# Supplementary material for: Genome sequence of the model rice variety KitaakeX
Source: BMC Genomics. 2019 Nov 27;20:905. doi: 10.1186/s12864-019-6262-4 (PMC6882167; doi:10.1186/s12864-019-6262-4)
Supplement: Supplementary file 4 — Additional file 4. Comparative genomic analysis between KitaakeX and Nipponbare. SNPs, InDels, PAVs, Inversions, and genes affected by SNPs, IndDels, PAVs and Inversions are listed in this file. [file 12864_2019_6262_MOESM4_ESM.xlsx]

## Sheet: SNPs
Additional file 4. Comparative genomic analysis between KitaakeX and Nipponbare
Chromosome	Position	Substitution
Chr1	4373	A>C
Chr1	10140	T>G
Chr1	20485	C>A
Chr1	24767	A>T
Chr1	36897	G>A
Chr1	37287	T>C
Chr1	38469	C>A
Chr1	41619	C>T
Chr1	45120	C>T
Chr1	69220	G>A
Chr1	80963	G>A
Chr1	94503	G>T
Chr1	98507	C>A
Chr1	108843	A>G
Chr1	114379	G>A
Chr1	114492	G>T
Chr1	116756	G>C
Chr1	117181	C>A
Chr1	123300	C>A
Chr1	123617	T>A
Chr1	124807	G>A
Chr1	128065	C>T
Chr1	132619	T>C
Chr1	136830	A>G
Chr1	139750	C>T
Chr1	140763	A>C
Chr1	140764	A>C
Chr1	147358	C>T
Chr1	164741	A>T
Chr1	170675	T>A
Chr1	175214	A>G
Chr1	175728	A>G
Chr1	178920	G>T
Chr1	184635	G>A
Chr1	185397	A>G
Chr1	188647	T>A
Chr1	189794	T>C
Chr1	190223	C>T
Chr1	195248	A>G
Chr1	197516	A>G
Chr1	199495	A>G
Chr1	208953	G>A
Chr1	228596	T>G
Chr1	236863	G>A
Chr1	247875	A>G
Chr1	253625	C>G
Chr1	255289	G>C
Chr1	259395	A>G
Chr1	260794	A>G
Chr1	261711	C>T
Chr1	271983	T>C
Chr1	274908	C>T
Chr1	288394	A>G
Chr1	290363	A>G
Chr1	291548	C>T
Chr1	298336	A>G
Chr1	299731	C>T
Chr1	303240	C>G
Chr1	312987	C>T
Chr1	318599	T>A
Chr1	339774	T>A
Chr1	350036	C>T
Chr1	375444	A>G
Chr1	385582	T>C
Chr1	397609	T>C
Chr1	405310	T>C
Chr1	411074	G>A
Chr1	412361	T>C
Chr1	416398	T>A
Chr1	436858	A>C
Chr1	457809	T>A
Chr1	459053	A>T
Chr1	469747	A>G
Chr1	471235	C>A
Chr1	471237	C>A
Chr1	471239	C>A
Chr1	497577	T>C
Chr1	497676	T>C
Chr1	497715	C>T
Chr1	497721	C>T
Chr1	497763	T>A
Chr1	497772	C>A
Chr1	497781	G>C
Chr1	497811	A>G
Chr1	497820	C>T
Chr1	497874	A>T
Chr1	497901	C>G
Chr1	497955	G>A
Chr1	497961	T>C
Chr1	498001	T>C
Chr1	498007	T>C
Chr1	498015	C>T
Chr1	498170	C>T
Chr1	498189	G>C
Chr1	498248	A>C
Chr1	498262	T>C
Chr1	498313	G>A
Chr1	498342	A>C
Chr1	498350	T>A
Chr1	498360	G>A
Chr1	498361	A>G
Chr1	498371	C>T
Chr1	498378	C>T
Chr1	498395	T>C
Chr1	498398	C>T
Chr1	498440	T>A
Chr1	498452	T>C
Chr1	498456	G>T
Chr1	498459	G>A
Chr1	498493	G>A
Chr1	498498	C>T
Chr1	498499	A>G
Chr1	498506	G>A
Chr1	498517	G>A
Chr1	498519	T>C
Chr1	498536	A>G
Chr1	498538	A>G
Chr1	498554	G>A
Chr1	498555	G>A
Chr1	498580	C>A
Chr1	498585	C>T
Chr1	498633	T>A
Chr1	498706	G>A
Chr1	498735	G>T
Chr1	498768	G>A
Chr1	498798	A>G
Chr1	498860	T>C
Chr1	498885	C>T
Chr1	498894	C>A
Chr1	498910	A>G
Chr1	498918	G>A
Chr1	498930	C>A
Chr1	498934	A>G
Chr1	498937	T>C
Chr1	498957	T>C
Chr1	498969	C>T
Chr1	498978	T>C
Chr1	498987	G>A
Chr1	499052	C>T
Chr1	499066	A>G
Chr1	499264	G>A
Chr1	499447	G>A
Chr1	499482	C>T
Chr1	499503	A>G
Chr1	499551	T>C
Chr1	499575	C>T
Chr1	499629	A>G
Chr1	499707	T>C
Chr1	499764	C>T
Chr1	499938	G>A
Chr1	500004	C>T
Chr1	500037	A>G
Chr1	500040	A>G
Chr1	500274	A>G
Chr1	500349	A>G
Chr1	500428	T>G
Chr1	500499	C>T
Chr1	500583	G>A
Chr1	500676	A>T
Chr1	500682	G>A
Chr1	500749	C>T
Chr1	500750	G>A
Chr1	500783	A>G
Chr1	500812	A>C
Chr1	500816	C>A
Chr1	501046	T>C
Chr1	501088	C>T
Chr1	501158	T>C
Chr1	501217	C>T
Chr1	501245	A>T
Chr1	501287	A>G
Chr1	501406	C>T
Chr1	501503	G>C
Chr1	501763	A>C
Chr1	501853	G>A
Chr1	502011	T>C
Chr1	502137	A>G
Chr1	502322	T>C
Chr1	504932	A>T
Chr1	534797	T>C
Chr1	559274	A>G
Chr1	560078	C>T
Chr1	561385	C>T
Chr1	562664	T>C
Chr1	575436	G>A
Chr1	576620	G>T
Chr1	579610	T>C
Chr1	580284	G>A
Chr1	586684	T>C
Chr1	589730	A>G
Chr1	599136	T>A
Chr1	599785	C>T
Chr1	609460	A>G
Chr1	609650	G>T
Chr1	622515	C>T
Chr1	628763	T>A
Chr1	711261	A>G
Chr1	759175	A>G
Chr1	783475	G>T
Chr1	852876	G>A
Chr1	857016	C>T
Chr1	905995	A>C
Chr1	906866	C>T
Chr1	913517	C>A
Chr1	1026886	G>T
Chr1	1033152	G>A
Chr1	1052256	G>A
Chr1	1052372	A>G
Chr1	1052537	C>G
Chr1	1052860	T>A
Chr1	1052931	T>A
Chr1	1053460	A>G
Chr1	1053496	A>G
Chr1	1053529	A>G
Chr1	1054070	G>T
Chr1	1054374	C>G
Chr1	1056216	G>A
Chr1	1056277	G>A
Chr1	1057044	C>T
Chr1	1058085	T>C
Chr1	1058992	A>G
Chr1	1059046	C>T
Chr1	1059968	C>T
Chr1	1059976	T>C
Chr1	1060190	C>G
Chr1	1060224	G>A
Chr1	1061391	A>T
Chr1	1061924	C>T
Chr1	1062829	C>T
Chr1	1062923	A>G
Chr1	1063135	A>G
Chr1	1063543	C>G
Chr1	1064043	A>T
Chr1	1064573	G>A
Chr1	1064636	G>A
Chr1	1064818	T>A
Chr1	1064822	C>T
Chr1	1065455	G>A
Chr1	1065943	G>T
Chr1	1066395	C>A
Chr1	1066496	T>G
Chr1	1066974	A>C
Chr1	1067129	A>G
Chr1	1067403	G>A
Chr1	1067420	T>A
Chr1	1067460	C>T
Chr1	1067467	A>G
Chr1	1067512	C>T
Chr1	1067516	A>G
Chr1	1067522	G>A
Chr1	1067552	C>T
Chr1	1067555	G>A
Chr1	1067560	G>A
Chr1	1067573	C>T
Chr1	1067583	T>C
Chr1	1067586	G>A
Chr1	1067599	C>T
Chr1	1067636	T>G
Chr1	1067670	A>G
Chr1	1067683	A>G
Chr1	1067688	C>T
Chr1	1067689	C>T
Chr1	1067741	T>G
Chr1	1067812	A>C
Chr1	1067916	C>T
Chr1	1068022	T>A
Chr1	1068142	G>A
Chr1	1068147	A>G
Chr1	1068192	T>G
Chr1	1068224	T>C
Chr1	1068228	G>A
Chr1	1068253	C>T
Chr1	1068315	T>C
Chr1	1068322	T>C
Chr1	1068733	C>T
Chr1	1068786	C>A
Chr1	1068788	G>C
Chr1	1068791	C>T
Chr1	1068808	C>T
Chr1	1068815	A>G
Chr1	1068825	C>T
Chr1	1068828	T>C
Chr1	1068841	G>A
Chr1	1068849	C>T
Chr1	1068886	A>G
Chr1	1068887	C>T
Chr1	1068904	A>G
Chr1	1068961	C>T
Chr1	1068979	A>T
Chr1	1068988	T>C
Chr1	1068991	C>T
Chr1	1069011	C>T
Chr1	1069073	T>C
Chr1	1069130	C>T
Chr1	1069211	A>G
Chr1	1070194	C>A
Chr1	1070344	T>A
Chr1	1070469	T>C
Chr1	1070658	C>A
Chr1	1070767	G>A
Chr1	1071106	G>A
Chr1	1072143	G>A
Chr1	1073361	A>G
Chr1	1073378	C>A
Chr1	1074476	C>T
Chr1	1075109	T>C
Chr1	1077413	C>T
Chr1	1077451	A>C
Chr1	1077601	A>T
Chr1	1077627	C>T
Chr1	1077738	A>G
Chr1	1077739	T>C
Chr1	1078409	T>C
Chr1	1078431	T>C
Chr1	1078458	T>G
Chr1	1078482	A>G
Chr1	1078495	C>T
Chr1	1078500	A>T
Chr1	1078676	T>G
Chr1	1078740	C>T
Chr1	1079107	G>A
Chr1	1079117	G>A
Chr1	1079124	A>G
Chr1	1079183	A>G
Chr1	1079184	C>T
Chr1	1079230	G>C
Chr1	1079265	A>G
Chr1	1079347	A>T
Chr1	1079379	C>G
Chr1	1079431	A>G
Chr1	1079452	G>A
Chr1	1079481	G>A
Chr1	1079498	G>A
Chr1	1079507	T>C
Chr1	1079508	C>T
Chr1	1079515	T>C
Chr1	1079561	T>C
Chr1	1079574	T>C
Chr1	1079579	A>G
Chr1	1079630	C>T
Chr1	1079639	A>G
Chr1	1079640	A>G
Chr1	1079694	T>C
Chr1	1079730	G>A
Chr1	1079758	C>T
Chr1	1079764	A>G
Chr1	1079775	G>A
Chr1	1079781	T>C
Chr1	1079842	T>A
Chr1	1079873	T>C
Chr1	1079949	T>C
Chr1	1079953	T>C
Chr1	1080034	T>G
Chr1	1080037	A>G
Chr1	1080047	G>A
Chr1	1080105	A>T
Chr1	1080111	G>A
Chr1	1080158	C>A
Chr1	1080212	G>T
Chr1	1080294	G>A
Chr1	1080341	C>T
Chr1	1080342	A>T
Chr1	1080415	T>A
Chr1	1080416	C>A
Chr1	1080529	C>T
Chr1	1080540	C>T
Chr1	1080573	C>T
Chr1	1080575	T>C
Chr1	1080611	G>T
Chr1	1080616	G>C
Chr1	1080705	C>T
Chr1	1080706	A>G
Chr1	1080714	A>G
Chr1	1080716	G>A
Chr1	1080718	G>A
Chr1	1080721	C>T
Chr1	1080741	G>A
Chr1	1081870	A>G
Chr1	1083617	G>C
Chr1	1085337	C>T
Chr1	1085960	G>A
Chr1	1087611	G>A
Chr1	1088331	T>A
Chr1	1088755	T>C
Chr1	1089847	T>G
Chr1	1089954	A>T
Chr1	1089968	C>T
Chr1	1090031	C>T
Chr1	1090106	A>T
Chr1	1090153	G>A
Chr1	1090603	T>G
Chr1	1096335	G>A
Chr1	1099442	A>T
Chr1	1099443	A>T
Chr1	1099444	A>T
Chr1	1107249	T>C
Chr1	1116068	A>G
Chr1	1121688	G>A
Chr1	1134362	C>T
Chr1	1146440	C>T
Chr1	1149697	G>A
Chr1	1149990	G>A
Chr1	1156159	A>G
Chr1	1175798	A>G
Chr1	1180160	C>G
Chr1	1185509	C>T
Chr1	1196920	G>A
Chr1	1209728	A>G
Chr1	1209950	A>T
Chr1	1210512	C>T
Chr1	1229645	A>C
Chr1	1238518	T>C
Chr1	1257266	T>C
Chr1	1278688	T>C
Chr1	1281565	G>A
Chr1	1282459	C>T
Chr1	1291024	G>A
Chr1	1295119	T>A
Chr1	1298122	T>C
Chr1	1298316	C>T
Chr1	1304006	G>A
Chr1	1305836	T>C
Chr1	1305987	C>G
Chr1	1309373	C>T
Chr1	1316709	C>T
Chr1	1320606	T>C
Chr1	1333932	T>C
Chr1	1335704	A>G
Chr1	1347368	G>A
Chr1	1347376	G>A
Chr1	1350723	C>A
Chr1	1362379	G>A
Chr1	1372742	T>C
Chr1	1372872	T>A
Chr1	1372873	T>A
Chr1	1376887	C>A
Chr1	1379866	G>A
Chr1	1381306	G>C
Chr1	1381307	G>C
Chr1	1381334	A>C
Chr1	1386248	A>G
Chr1	1386779	A>T
Chr1	1386993	A>G
Chr1	1387115	G>C
Chr1	1390603	A>G
Chr1	1391817	G>C
Chr1	1393622	G>T
Chr1	1393988	G>A
Chr1	1394800	T>C
Chr1	1396733	A>G
Chr1	1396803	G>A
Chr1	1396814	C>T
Chr1	1396824	G>A
Chr1	1398829	A>G
Chr1	1398844	A>T
Chr1	1398995	G>T
Chr1	1399092	A>T
Chr1	1399095	T>A
Chr1	1399122	G>C
Chr1	1399130	G>A
Chr1	1399262	T>C
Chr1	1399274	A>C
Chr1	1417528	T>A
Chr1	1417541	G>A
Chr1	1417551	G>C
Chr1	1417559	G>C
Chr1	1417566	G>A
Chr1	1417630	T>G
Chr1	1417661	T>C
Chr1	1418377	T>C
Chr1	1418380	G>A
Chr1	1418390	G>A
Chr1	1418393	A>C
Chr1	1418487	C>T
Chr1	1418489	T>A
Chr1	1418523	C>T
Chr1	1418540	C>T
Chr1	1418589	G>A
Chr1	1418598	C>T
Chr1	1418599	G>T
Chr1	1418685	A>G
Chr1	1418695	T>C
Chr1	1418734	T>C
Chr1	1418739	T>C
Chr1	1418751	T>C
Chr1	1418756	T>C
Chr1	1418758	C>T
Chr1	1418771	T>C
Chr1	1418788	G>A
Chr1	1418871	G>A
Chr1	1418937	A>G
Chr1	1418940	T>C
Chr1	1418966	T>C
Chr1	1418971	G>A
Chr1	1418994	T>C
Chr1	1419004	G>A
Chr1	1419046	G>A
Chr1	1419113	G>A
Chr1	1419143	T>C
Chr1	1419206	C>T
Chr1	1419264	A>G
Chr1	1419267	T>C
Chr1	1419268	G>A
Chr1	1419275	G>C
Chr1	1419305	G>A
Chr1	1419327	A>G
Chr1	1419365	T>C
Chr1	1419412	A>G
Chr1	1419428	G>T
Chr1	1419470	C>T
Chr1	1419471	G>A
Chr1	1419482	T>C
Chr1	1419502	G>C
Chr1	1419568	G>A
Chr1	1419645	G>A
Chr1	1419722	A>G
Chr1	1419723	A>G
Chr1	1419862	G>A
Chr1	1419881	C>T
Chr1	1419914	G>A
Chr1	1420027	C>T
Chr1	1420031	G>T
Chr1	1420074	C>T
Chr1	1420263	T>A
Chr1	1420283	G>A
Chr1	1420443	A>G
Chr1	1420508	T>A
Chr1	1420691	T>C
Chr1	1420817	A>G
Chr1	1420971	A>G
Chr1	1421008	A>G
Chr1	1421009	A>T
Chr1	1421019	C>T
Chr1	1421020	A>G
Chr1	1421053	C>G
Chr1	1421140	A>T
Chr1	1421150	G>A
Chr1	1421204	T>C
Chr1	1421205	T>C
Chr1	1426245	C>A
Chr1	1426246	A>C
Chr1	1426264	A>G
Chr1	1426268	C>T
Chr1	1426275	A>G
Chr1	1426283	G>C
Chr1	1426284	C>T
Chr1	1426288	G>A
Chr1	1426310	C>T
Chr1	1426311	A>G
Chr1	1426312	C>G
Chr1	1426329	C>T
Chr1	1426336	T>C
Chr1	1426345	T>G
Chr1	1426355	T>C
Chr1	1426356	G>A
Chr1	1426397	C>T
Chr1	1426441	A>G
Chr1	1426479	C>T
Chr1	1426512	A>G
Chr1	1426716	G>A
Chr1	1426742	G>A
Chr1	1426748	T>G
Chr1	1426803	A>G
Chr1	1426825	T>G
Chr1	1426933	G>A
Chr1	1426979	G>A
Chr1	1427017	G>A
Chr1	1427222	G>A
Chr1	1427228	G>C
Chr1	1427362	A>T
Chr1	1427403	T>C
Chr1	1427416	A>G
Chr1	1427453	C>T
Chr1	1427461	C>T
Chr1	1427555	C>T
Chr1	1427560	C>T
Chr1	1427571	T>A
Chr1	1427593	T>C
Chr1	1427604	C>T
Chr1	1427702	C>A
Chr1	1427708	C>T
Chr1	1427843	C>T
Chr1	1427978	A>C
Chr1	1427989	T>G
Chr1	1428009	C>G
Chr1	1428010	C>T
Chr1	1428014	T>C
Chr1	1428044	T>A
Chr1	1428156	A>T
Chr1	1428180	G>C
Chr1	1428188	A>G
Chr1	1428193	T>G
Chr1	1428208	C>T
Chr1	1428235	C>T
Chr1	1428291	C>T
Chr1	1428370	T>C
Chr1	1428593	A>G
Chr1	1428673	C>G
Chr1	1428689	C>G
Chr1	1428701	A>G
Chr1	1428759	A>T
Chr1	1428760	C>A
Chr1	1428764	C>T
Chr1	1428777	A>T
Chr1	1428802	T>A
Chr1	1428823	G>T
Chr1	1428869	C>G
Chr1	1428913	C>G
Chr1	1428949	T>C
Chr1	1428961	T>C
Chr1	1428969	G>T
Chr1	1428971	A>G
Chr1	1429075	G>A
Chr1	1429106	C>T
Chr1	1429133	A>G
Chr1	1429189	G>A
Chr1	1429214	T>G
Chr1	1429254	G>A
Chr1	1429310	A>T
Chr1	1429353	G>A
Chr1	1429366	G>A
Chr1	1429963	T>G
Chr1	1429971	T>C
Chr1	1429992	A>T
Chr1	1430045	A>T
Chr1	1430057	G>A
Chr1	1430086	G>T
Chr1	1430904	T>C
Chr1	1430945	T>C
Chr1	1431078	T>A
Chr1	1431097	T>C
Chr1	1431100	T>A
Chr1	1431108	T>C
Chr1	1431109	T>A
Chr1	1431131	A>G
Chr1	1431702	C>A
Chr1	1431722	A>G
Chr1	1431726	T>G
Chr1	1431727	G>C
Chr1	1431729	G>C
Chr1	1431731	G>C
Chr1	1431732	G>T
Chr1	1431752	C>G
Chr1	1431773	C>A
Chr1	1431774	C>G
Chr1	1431775	T>A
Chr1	1431776	A>G
Chr1	1431936	G>T
Chr1	1431938	T>A
Chr1	1431966	C>G
Chr1	1431972	C>T
Chr1	1432031	G>C
Chr1	1432032	C>T
Chr1	1432039	G>A
Chr1	1432045	G>C
Chr1	1432059	A>G
Chr1	1432061	A>C
Chr1	1432313	G>C
Chr1	1432331	A>G
Chr1	1432353	A>G
Chr1	1432354	T>G
Chr1	1432369	T>G
Chr1	1432374	C>A
Chr1	1432384	A>C
Chr1	1432487	G>C
Chr1	1432655	G>A
Chr1	1432681	A>T
Chr1	1432687	G>A
Chr1	1432688	C>G
Chr1	1432689	C>A
Chr1	1432698	A>G
Chr1	1432732	T>C
Chr1	1432760	C>A
Chr1	1432768	A>G
Chr1	1432769	A>G
Chr1	1432784	C>A
Chr1	1432813	G>A
Chr1	1432814	G>A
Chr1	1432823	C>G
Chr1	1432886	T>C
Chr1	1433861	C>T
Chr1	1433877	G>T
Chr1	1433907	T>C
Chr1	1433923	C>T
Chr1	1433987	G>C
Chr1	1434023	G>C
Chr1	1434026	C>G
Chr1	1434469	A>G
Chr1	1434594	G>C
Chr1	1434673	A>G
Chr1	1434699	A>G
Chr1	1434708	A>G
Chr1	1434734	T>G
Chr1	1434741	A>C
Chr1	1434754	G>A
Chr1	1434772	T>A
Chr1	1434778	A>T
Chr1	1434781	C>G
Chr1	1434834	A>C
Chr1	1434877	G>A
Chr1	1434899	G>T
Chr1	1435550	T>C
Chr1	1435592	C>T
Chr1	1435600	A>G
Chr1	1435649	C>T
Chr1	1435662	T>C
Chr1	1435711	C>A
Chr1	1435713	A>G
Chr1	1435751	G>A
Chr1	1435806	T>C
Chr1	1435824	T>C
Chr1	1435884	C>A
Chr1	1436473	C>T
Chr1	1436600	A>T
Chr1	1436608	G>A
Chr1	1436644	A>G
Chr1	1436709	A>C
Chr1	1436768	C>T
Chr1	1436771	C>T
Chr1	1436780	C>T
Chr1	1436781	G>A
Chr1	1436884	T>C
Chr1	1436935	T>A
Chr1	1436953	C>T
Chr1	1437387	A>T
Chr1	1437396	A>C
Chr1	1438211	A>G
Chr1	1438465	A>C
Chr1	1438575	C>A
Chr1	1438636	G>T
Chr1	1439395	A>G
Chr1	1440146	T>A
Chr1	1440452	T>C
Chr1	1440485	G>A
Chr1	1440595	T>C
Chr1	1440597	A>G
Chr1	1440845	A>G
Chr1	1440915	T>G
Chr1	1440916	T>A
Chr1	1441085	C>T
Chr1	1444455	A>T
Chr1	1444977	T>G
Chr1	1445167	A>G
Chr1	1445960	C>T
Chr1	1446519	T>C
Chr1	1447174	C>T
Chr1	1448556	T>G
Chr1	1450585	T>C
Chr1	1451542	A>C
Chr1	1451571	G>A
Chr1	1452761	C>T
Chr1	1452955	G>A
Chr1	1454255	C>T
Chr1	1454286	C>T
Chr1	1455531	C>T
Chr1	1455548	T>C
Chr1	1455653	T>A
Chr1	1455941	T>G
Chr1	1456064	C>T
Chr1	1456075	G>C
Chr1	1456106	G>A
Chr1	1456116	T>A
Chr1	1456121	A>G
Chr1	1456128	G>A
Chr1	1456138	A>G
Chr1	1456154	G>A
Chr1	1456157	T>A
Chr1	1456158	A>C
Chr1	1456230	T>A
Chr1	1456278	A>G
Chr1	1456292	T>G
Chr1	1456316	C>A
Chr1	1456362	A>C
Chr1	1456384	T>A
Chr1	1456385	C>A
Chr1	1456439	C>T
Chr1	1456567	G>T
Chr1	1456607	C>T
Chr1	1456620	G>A
Chr1	1456653	C>T
Chr1	1456755	A>G
Chr1	1456774	G>A
Chr1	1456782	A>G
Chr1	1456795	G>T
Chr1	1456849	T>C
Chr1	1456866	T>C
Chr1	1456874	G>A
Chr1	1456976	A>T
Chr1	1456992	A>G
Chr1	1457029	A>T
Chr1	1457433	G>A
Chr1	1457623	G>A
Chr1	1464037	A>C
Chr1	1466324	G>A
Chr1	1466347	A>G
Chr1	1466366	A>G
Chr1	1466986	T>C
Chr1	1467907	T>C
Chr1	1467947	C>T
Chr1	1469199	T>A
Chr1	1470263	T>C
Chr1	1470501	C>A
Chr1	1470797	A>G
Chr1	1471028	C>T
Chr1	1471390	C>G
Chr1	1471544	C>T
Chr1	1471622	G>A
Chr1	1472063	G>A
Chr1	1472080	T>C
Chr1	1472106	A>G
Chr1	1472116	G>A
Chr1	1472139	T>C
Chr1	1472145	T>C
Chr1	1472164	C>G
Chr1	1472200	A>G
Chr1	1472251	C>A
Chr1	1472291	A>C
Chr1	1472337	C>T
Chr1	1472346	A>G
Chr1	1472436	T>A
Chr1	1472457	T>C
Chr1	1472563	A>G
Chr1	1472821	A>G
Chr1	1473451	A>G
Chr1	1473838	C>A
Chr1	1473857	G>T
Chr1	1473895	A>G
Chr1	1473935	C>T
Chr1	1473939	G>A
Chr1	1473940	T>C
Chr1	1473966	T>C
Chr1	1474077	A>T
Chr1	1474091	T>C
Chr1	1474108	C>T
Chr1	1474208	T>C
Chr1	1474271	A>T
Chr1	1474794	G>A
Chr1	1475665	G>A
Chr1	1475673	G>A
Chr1	1475696	G>A
Chr1	1475792	G>A
Chr1	1475797	C>T
Chr1	1475907	C>T
Chr1	1475962	G>A
Chr1	1475968	C>T
Chr1	1475980	G>A
Chr1	1476045	A>G
Chr1	1476055	T>C
Chr1	1476072	A>G
Chr1	1476080	A>G
Chr1	1476082	G>A
Chr1	1476116	C>T
Chr1	1476951	G>T
Chr1	1477049	C>T
Chr1	1477268	C>T
Chr1	1477832	T>G
Chr1	1477955	T>C
Chr1	1477987	T>C
Chr1	1478045	C>T
Chr1	1478076	C>T
Chr1	1478101	T>G
Chr1	1478161	C>T
Chr1	1478192	C>T
Chr1	1478236	T>C
Chr1	1478241	T>C
Chr1	1478247	T>C
Chr1	1478280	A>G
Chr1	1478284	A>G
Chr1	1478294	A>G
Chr1	1478295	A>G
Chr1	1478296	T>C
Chr1	1478310	A>G
Chr1	1478314	A>C
Chr1	1478340	T>G
Chr1	1478352	T>C
Chr1	1478357	T>C
Chr1	1478378	G>A
Chr1	1478379	T>C
Chr1	1478431	C>T
Chr1	1478654	C>T
Chr1	1478655	G>A
Chr1	1478664	A>C
Chr1	1478678	C>T
Chr1	1478737	C>T
Chr1	1478763	A>G
Chr1	1478779	A>G
Chr1	1478853	C>T
Chr1	1478955	C>T
Chr1	1478986	T>G
Chr1	1479073	C>G
Chr1	1479091	G>A
Chr1	1479134	A>G
Chr1	1479165	T>A
Chr1	1479173	A>T
Chr1	1479272	A>C
Chr1	1479502	G>A
Chr1	1480050	A>C
Chr1	1480227	A>G
Chr1	1481758	T>A
Chr1	1481888	T>G
Chr1	1482026	A>G
Chr1	1482105	A>G
Chr1	1482284	G>T
Chr1	1483016	T>G
Chr1	1483197	C>T
Chr1	1483214	T>A
Chr1	1483284	T>C
Chr1	1483289	C>T
Chr1	1483297	A>G
Chr1	1483308	C>T
Chr1	1483400	C>T
Chr1	1483445	C>T
Chr1	1483510	G>A
Chr1	1483528	C>G
Chr1	1483595	A>G
Chr1	1483613	G>T
Chr1	1483724	G>A
Chr1	1483928	G>A
Chr1	1484065	T>C
Chr1	1484223	T>C
Chr1	1484281	T>C
Chr1	1484352	G>A
Chr1	1484471	G>A
Chr1	1484552	C>T
Chr1	1484834	G>A
Chr1	1484862	T>C
Chr1	1484864	G>T
Chr1	1484943	G>T
Chr1	1484976	G>A
Chr1	1484996	G>A
Chr1	1485032	A>G
Chr1	1485212	G>T
Chr1	1485264	A>G
Chr1	1485293	T>C
Chr1	1485331	T>C
Chr1	1485341	G>A
Chr1	1485409	T>C
Chr1	1485411	T>C
Chr1	1485413	A>G
Chr1	1485451	G>A
Chr1	1485531	A>G
Chr1	1485540	T>C
Chr1	1485595	A>G
Chr1	1485674	C>T
Chr1	1485707	A>G
Chr1	1485824	C>A
Chr1	1485943	A>C
Chr1	1486119	G>A
Chr1	1486154	G>C
Chr1	1486312	T>C
Chr1	1486476	T>C
Chr1	1486577	G>A
Chr1	1486578	A>G
Chr1	1486659	G>A
Chr1	1486670	T>C
Chr1	1486725	C>T
Chr1	1486751	C>T
Chr1	1486759	G>A
Chr1	1486766	C>T
Chr1	1486852	C>G
Chr1	1486864	C>T
Chr1	1486872	C>T
Chr1	1486879	C>T
Chr1	1486975	G>A
Chr1	1492210	A>G
Chr1	1492220	C>T
Chr1	1492227	T>C
Chr1	1492233	C>T
Chr1	1492316	A>G
Chr1	1492340	A>T
Chr1	1492352	C>T
Chr1	1492368	T>C
Chr1	1492503	C>T
Chr1	1492805	A>T
Chr1	1492824	G>C
Chr1	1493100	T>C
Chr1	1493658	G>A
Chr1	1494734	C>T
Chr1	1546304	A>T
Chr1	1546318	A>G
Chr1	1546319	A>T
Chr1	1546351	C>T
Chr1	1546406	T>C
Chr1	1546474	G>C
Chr1	1546476	A>T
Chr1	1546503	T>C
Chr1	1546507	C>T
Chr1	1546515	C>T
Chr1	1546595	G>A
Chr1	1546629	T>A
Chr1	1546648	C>G
Chr1	1546721	A>T
Chr1	1546732	T>C
Chr1	1546761	T>A
Chr1	1546765	C>T
Chr1	1546766	G>C
Chr1	1546787	G>A
Chr1	1546790	C>T
Chr1	1546795	C>T
Chr1	1546798	T>A
Chr1	1546815	G>A
Chr1	1546816	G>A
Chr1	1546818	C>T
Chr1	1546824	G>A
Chr1	1546827	T>C
Chr1	1546836	C>T
Chr1	1546839	A>C
Chr1	1546841	C>T
Chr1	1546846	T>C
Chr1	1546848	G>A
Chr1	1546853	C>A
Chr1	1546855	T>C
Chr1	1546860	C>T
Chr1	1546863	A>G
Chr1	1546872	A>G
Chr1	1546899	T>C
Chr1	1546938	A>G
Chr1	1547050	C>T
Chr1	1547051	T>C
Chr1	1547066	C>A
Chr1	1547081	G>T
Chr1	1547092	G>C
Chr1	1547101	A>G
Chr1	1547238	G>A
Chr1	1547250	C>G
Chr1	1547331	T>C
Chr1	1547389	G>A
Chr1	1547392	G>A
Chr1	1547393	T>C
Chr1	1547403	G>T
Chr1	1547404	A>T
Chr1	1547413	G>T
Chr1	1547435	G>C
Chr1	1547466	G>C
Chr1	1547483	A>T
Chr1	1547484	G>C
Chr1	1547485	T>G
Chr1	1547492	T>C
Chr1	1547534	G>A
Chr1	1547679	G>A
Chr1	1547682	G>A
Chr1	1547814	T>C
Chr1	1547835	G>T
Chr1	1547848	G>A
Chr1	1547849	T>C
Chr1	1547852	A>T
Chr1	1547855	T>C
Chr1	1547860	T>A
Chr1	1547865	C>G
Chr1	1547875	G>A
Chr1	1547885	G>T
Chr1	1547892	A>G
Chr1	1547895	T>G
Chr1	1548111	T>C
Chr1	1548128	G>A
Chr1	1548129	C>G
Chr1	1548204	G>A
Chr1	1548211	A>G
Chr1	1548212	C>T
Chr1	1548214	T>G
Chr1	1548215	C>G
Chr1	1548218	T>C
Chr1	1548219	T>G
Chr1	1548220	T>G
Chr1	1548412	C>T
Chr1	1548427	G>C
Chr1	1548433	T>A
Chr1	1548548	T>A
Chr1	1548557	G>C
Chr1	1548583	T>C
Chr1	1548716	C>G
Chr1	1548765	C>T
Chr1	1548814	G>C
Chr1	1548864	G>A
Chr1	1548894	T>C
Chr1	1548965	C>T
Chr1	1549023	A>C
Chr1	1549024	T>A
Chr1	1549027	A>C
Chr1	1549029	A>T
Chr1	1549058	C>T
Chr1	1549059	A>G
Chr1	1549119	T>A
Chr1	1549243	G>C
Chr1	1549307	A>G
Chr1	1549348	G>C
Chr1	1549646	T>A
Chr1	1549675	A>C
Chr1	1549749	A>T
Chr1	1549761	A>G
Chr1	1549785	C>T
Chr1	1549786	C>G
Chr1	1549794	G>A
Chr1	1549799	C>T
Chr1	1549818	C>A
Chr1	1549877	G>A
Chr1	1549892	A>T
Chr1	1549904	C>A
Chr1	1549939	A>G
Chr1	1549954	A>T
Chr1	1550053	T>C
Chr1	1550065	T>C
Chr1	1550105	T>A
Chr1	1550210	T>C
Chr1	1550229	A>G
Chr1	1550273	G>C
Chr1	1550291	C>T
Chr1	1550345	G>T
Chr1	1550414	T>G
Chr1	1550606	G>C
Chr1	1550664	T>A
Chr1	1550681	C>T
Chr1	1550687	A>T
Chr1	1550688	A>G
Chr1	1550707	G>C
Chr1	1550716	C>T
Chr1	1550776	G>T
Chr1	1550840	C>T
Chr1	1550859	C>G
Chr1	1550880	T>C
Chr1	1550952	T>A
Chr1	1551063	C>T
Chr1	1551067	T>C
Chr1	1551072	C>T
Chr1	1551095	A>G
Chr1	1551118	G>A
Chr1	1551179	T>A
Chr1	1551182	G>A
Chr1	1551186	T>G
Chr1	1551210	C>T
Chr1	1551227	G>A
Chr1	1551261	C>T
Chr1	1551265	C>T
Chr1	1551307	C>T
Chr1	1551383	T>G
Chr1	1551521	T>C
Chr1	1551534	T>C
Chr1	1551558	T>C
Chr1	1551567	C>T
Chr1	1551572	T>C
Chr1	1551589	A>G
Chr1	1551595	G>A
Chr1	1551632	T>C
Chr1	1551638	A>T
Chr1	1551648	C>A
Chr1	1551656	C>T
Chr1	1551662	C>T
Chr1	1551686	C>T
Chr1	1551722	T>C
Chr1	1551737	T>C
Chr1	1551738	T>C
Chr1	1551739	G>A
Chr1	1551740	T>G
Chr1	1551751	C>T
Chr1	1551757	A>G
Chr1	1551763	T>G
Chr1	1551766	G>A
Chr1	1551768	C>T
Chr1	1551775	C>T
Chr1	1551790	C>A
Chr1	1551791	A>G
Chr1	1551835	A>G
Chr1	1551838	T>C
Chr1	1551861	C>T
Chr1	1551896	A>T
Chr1	1552000	T>C
Chr1	1552019	G>A
Chr1	1552045	C>T
Chr1	1552102	G>T
Chr1	1552129	A>C
Chr1	1552141	G>A
Chr1	1552149	G>A
Chr1	1552153	G>C
Chr1	1552183	G>A
Chr1	1552207	G>A
Chr1	1552243	A>G
Chr1	1552256	A>G
Chr1	1552264	G>A
Chr1	1552288	C>T
Chr1	1552297	A>G
Chr1	1552299	C>G
Chr1	1552302	C>A
Chr1	1552340	A>T
Chr1	1552341	T>C
Chr1	1552342	T>A
Chr1	1552358	G>A
Chr1	1552372	C>A
Chr1	1552415	T>C
Chr1	1552425	A>G
Chr1	1552459	C>T
Chr1	1552470	T>G
Chr1	1552481	C>T
Chr1	1552490	G>A
Chr1	1552500	T>C
Chr1	1552537	T>C
Chr1	1552539	A>T
Chr1	1552632	A>C
Chr1	1552646	T>C
Chr1	1552733	T>C
Chr1	1552753	G>A
Chr1	1552804	A>T
Chr1	1552873	A>G
Chr1	1552881	A>C
Chr1	1552904	T>G
Chr1	1552915	C>A
Chr1	1552923	G>A
Chr1	1552955	T>G
Chr1	1552961	A>G
Chr1	1552978	A>G
Chr1	1552996	A>C
Chr1	1553023	A>G
Chr1	1553029	G>A
Chr1	1553041	C>A
Chr1	1553080	T>C
Chr1	1553083	G>A
Chr1	1553153	G>T
Chr1	1553154	T>C
Chr1	1553182	G>T
Chr1	1553183	G>T
Chr1	1553184	C>T
Chr1	1553195	G>T
Chr1	1553196	T>C
Chr1	1553204	T>A
Chr1	1553235	C>T
Chr1	1553251	G>A
Chr1	1553350	G>C
Chr1	1553380	T>C
Chr1	1553473	T>C
Chr1	1553479	C>T
Chr1	1553559	G>T
Chr1	1553562	T>G
Chr1	1553569	C>G
Chr1	1553613	C>T
Chr1	1553674	A>G
Chr1	1553737	A>G
Chr1	1553772	G>T
Chr1	1553773	C>G
Chr1	1553815	G>C
Chr1	1553824	C>G
Chr1	1553969	C>T
Chr1	1553978	G>T
Chr1	1554114	T>G
Chr1	1554208	G>A
Chr1	1554253	T>C
Chr1	1554325	G>C
Chr1	1554328	T>C
Chr1	1554358	C>T
Chr1	1554376	A>G
Chr1	1554429	C>A
Chr1	1554447	T>A
Chr1	1554448	A>T
Chr1	1554467	A>G
Chr1	1554473	C>T
Chr1	1554478	A>T
Chr1	1554479	A>T
Chr1	1554484	C>T
Chr1	1554489	A>G
Chr1	1555983	A>C
Chr1	1555990	T>C
Chr1	1556011	G>A
Chr1	1556119	T>A
Chr1	1556133	C>A
Chr1	1556146	G>T
Chr1	1556218	C>G
Chr1	1556224	C>G
Chr1	1556226	C>A
Chr1	1556227	G>C
Chr1	1556242	A>G
Chr1	1556305	C>A
Chr1	1556359	G>A
Chr1	1556384	T>C
Chr1	1556385	G>T
Chr1	1556468	C>T
Chr1	1556475	C>G
Chr1	1556480	T>A
Chr1	1556497	T>A
Chr1	1556512	T>C
Chr1	1556526	T>G
Chr1	1556575	A>C
Chr1	1556590	G>A
Chr1	1556890	C>T
Chr1	1556893	C>T
Chr1	1556961	A>C
Chr1	1556981	A>G
Chr1	1557569	A>T
Chr1	1557736	A>G
Chr1	1557744	A>G
Chr1	1557796	T>C
Chr1	1557807	G>T
Chr1	1557899	G>T
Chr1	1557905	T>G
Chr1	1557931	G>A
Chr1	1557938	C>T
Chr1	1557948	G>T
Chr1	1557955	A>G
Chr1	1557975	C>T
Chr1	1557976	G>A
Chr1	1557990	A>G
Chr1	1558032	A>G
Chr1	1558115	C>T
Chr1	1558132	T>A
Chr1	1558134	T>A
Chr1	1558150	C>T
Chr1	1558169	A>C
Chr1	1558194	T>C
Chr1	1558208	A>T
Chr1	1558213	G>A
Chr1	1558243	A>G
Chr1	1558244	C>T
Chr1	1558258	G>C
Chr1	1558289	T>C
Chr1	1558359	A>T
Chr1	1558378	A>G
Chr1	1558394	T>G
Chr1	1558403	G>T
Chr1	1558631	T>C
Chr1	1558654	T>C
Chr1	1558726	C>A
Chr1	1558739	A>C
Chr1	1559018	A>G
Chr1	1559150	A>G
Chr1	1559524	A>T
Chr1	1559598	T>C
Chr1	1559633	A>G
Chr1	1561135	A>C
Chr1	1561289	C>T
Chr1	1561744	T>C
Chr1	1562167	C>T
Chr1	1563075	C>T
Chr1	1563281	C>G
Chr1	1563862	T>C
Chr1	1564231	A>G
Chr1	1564649	A>T
Chr1	1566453	C>T
Chr1	1566489	T>G
Chr1	1566771	T>C
Chr1	1566792	C>G
Chr1	1566923	A>G
Chr1	1567166	G>A
Chr1	1567472	A>G
Chr1	1567475	T>C
Chr1	1567554	T>G
Chr1	1567814	T>A
Chr1	1568082	T>A
Chr1	1568259	T>C
Chr1	1568469	G>T
Chr1	1568515	G>C
Chr1	1568565	T>C
Chr1	1568595	A>G
Chr1	1568638	A>G
Chr1	1568640	A>G
Chr1	1568670	T>C
Chr1	1568844	G>A
Chr1	1568872	C>G
Chr1	1568884	C>T
Chr1	1568896	G>C
Chr1	1568944	T>C
Chr1	1568959	G>A
Chr1	1568967	T>C
Chr1	1568968	C>G
Chr1	1569507	C>T
Chr1	1569897	C>T
Chr1	1569915	G>A
Chr1	1569941	A>G
Chr1	1570015	G>A
Chr1	1570280	G>A
Chr1	1570366	C>T
Chr1	1570419	A>G
Chr1	1570425	G>A
Chr1	1570437	C>T
Chr1	1570462	A>G
Chr1	1570488	C>T
Chr1	1570561	G>A
Chr1	1570568	A>G
Chr1	1570620	G>A
Chr1	1570881	C>G
Chr1	1570916	C>A
Chr1	1570917	G>A
Chr1	1570986	C>G
Chr1	1570989	C>G
Chr1	1571145	G>C
Chr1	1571238	T>G
Chr1	1571346	C>T
Chr1	1571352	A>T
Chr1	1571359	G>A
Chr1	1571395	G>A
Chr1	1571417	T>C
Chr1	1572019	A>C
Chr1	1572022	T>G
Chr1	1572028	C>T
Chr1	1572107	G>T
Chr1	1572218	A>G
Chr1	1572263	A>C
Chr1	1572291	A>C
Chr1	1572419	A>G
Chr1	1572466	T>C
Chr1	1572518	C>G
Chr1	1572593	G>A
Chr1	1572617	C>A
Chr1	1572658	G>A
Chr1	1572777	A>T
Chr1	1572908	T>A
Chr1	1572939	A>T
Chr1	1572968	C>T
Chr1	1573003	C>T
Chr1	1573427	T>C
Chr1	1573503	A>G
Chr1	1573556	T>C
Chr1	1573734	G>C
Chr1	1573736	G>A
Chr1	1573746	A>G
Chr1	1573748	A>T
Chr1	1573753	T>C
Chr1	1573757	T>C
Chr1	1573758	G>A
Chr1	1573766	G>A
Chr1	1573769	G>T
Chr1	1573779	C>T
Chr1	1573795	A>T
Chr1	1573798	G>A
Chr1	1573804	G>A
Chr1	1573808	C>T
Chr1	1573809	T>C
Chr1	1573811	C>T
Chr1	1573812	T>C
Chr1	1573814	G>A
Chr1	1573852	A>G
Chr1	1573859	G>A
Chr1	1573865	G>A
Chr1	1573868	A>T
Chr1	1573872	A>G
Chr1	1573885	G>A
Chr1	1573893	A>G
Chr1	1573896	G>T
Chr1	1573898	A>G
Chr1	1573919	G>C
Chr1	1573930	C>T
Chr1	1573931	A>T
Chr1	1573942	G>A
Chr1	1573951	G>T
Chr1	1573976	T>C
Chr1	1574962	G>C
Chr1	1574979	G>A
Chr1	1574980	G>A
Chr1	1574983	C>A
Chr1	1574987	T>C
Chr1	1575008	A>G
Chr1	1575060	A>G
Chr1	1575077	G>A
Chr1	1575080	C>T
Chr1	1575165	A>T
Chr1	1575173	C>G
Chr1	1575177	G>A
Chr1	1575180	T>G
Chr1	1575185	C>A
Chr1	1575194	C>A
Chr1	1575214	A>G
Chr1	1575298	A>G
Chr1	1575356	G>T
Chr1	1575357	A>T
Chr1	1575360	C>T
Chr1	1575361	G>T
Chr1	1575367	T>G
Chr1	1575368	G>C
Chr1	1575369	T>C
Chr1	1575370	G>A
Chr1	1575372	T>C
Chr1	1575375	T>A
Chr1	1575376	A>T
Chr1	1575381	T>C
Chr1	1575445	G>A
Chr1	1575481	T>G
Chr1	1575495	A>G
Chr1	1575506	A>C
Chr1	1575513	C>T
Chr1	1575514	C>T
Chr1	1575516	C>T
Chr1	1575567	A>G
Chr1	1575584	T>C
Chr1	1575588	T>C
Chr1	1575600	G>C
Chr1	1575658	T>A
Chr1	1575737	T>C
Chr1	1575773	G>A
Chr1	1575776	G>A
Chr1	1575818	C>A
Chr1	1575891	G>C
Chr1	1575902	A>C
Chr1	1575905	A>G
Chr1	1575940	A>G
Chr1	1576049	T>C
Chr1	1576148	C>T
Chr1	1576163	C>T
Chr1	1576393	A>G
Chr1	1576406	C>T
Chr1	1576416	T>A
Chr1	1576442	A>T
Chr1	1576470	T>C
Chr1	1576489	G>A
Chr1	1576516	A>G
Chr1	1576544	C>A
Chr1	1576646	T>C
Chr1	1576710	A>C
Chr1	1576727	G>A
Chr1	1576808	A>G
Chr1	1576824	T>A
Chr1	1576828	G>C
Chr1	1576841	A>C
Chr1	1576894	G>T
Chr1	1576912	T>A
Chr1	1576913	G>A
Chr1	1576923	C>T
Chr1	1576944	G>A
Chr1	1577060	C>T
Chr1	1577139	C>A
Chr1	1577459	C>A
Chr1	1577489	A>G
Chr1	1577490	A>G
Chr1	1577504	G>C
Chr1	1577626	G>A
Chr1	1578061	T>C
Chr1	1590684	C>T
Chr1	1592774	A>T
Chr1	1598680	G>A
Chr1	1604018	C>A
Chr1	1608569	A>G
Chr1	1627139	T>C
Chr1	1642367	A>G
Chr1	1642404	G>A
Chr1	1642964	C>T
Chr1	1645980	G>A
Chr1	1649789	A>G
Chr1	1652634	C>T
Chr1	1653351	A>G
Chr1	1654559	A>G
Chr1	1658941	A>G
Chr1	1665135	A>T
Chr1	1666664	G>A
Chr1	1667831	A>G
Chr1	1668477	G>T
Chr1	1668707	C>G
Chr1	1679021	C>T
Chr1	1680771	A>G
Chr1	1680895	A>T
Chr1	1683122	G>A
Chr1	1684276	C>T
Chr1	1687369	A>G
Chr1	1695509	C>T
Chr1	1696131	T>C
Chr1	1712334	T>C
Chr1	1712491	C>A
Chr1	1719303	T>C
Chr1	1722291	A>G
Chr1	1723004	C>G
Chr1	1729226	C>T
Chr1	1734979	G>A
Chr1	1745800	A>G
Chr1	1747520	T>C
Chr1	1748620	A>G
Chr1	1752556	T>C
Chr1	1752771	C>T
Chr1	1753803	C>A
Chr1	1762121	T>A
Chr1	1762662	A>C
Chr1	1763537	A>G
Chr1	1770993	C>T
Chr1	1771644	C>T
Chr1	1775002	C>T
Chr1	1775841	T>C
Chr1	1775907	T>C
Chr1	1777375	A>G
Chr1	1780351	G>C
Chr1	1782046	C>T
Chr1	1782453	T>A
Chr1	1786345	T>C
Chr1	1787615	G>A
Chr1	1789513	T>G
Chr1	1797170	C>T
Chr1	1798620	G>T
Chr1	1818013	T>C
Chr1	1818015	C>T
Chr1	1829997	A>G
Chr1	1841467	T>C
Chr1	1842057	T>C
Chr1	1842603	G>A
Chr1	1843196	T>A
Chr1	1850029	A>G
Chr1	1850401	T>C
Chr1	1851811	T>A
Chr1	1853461	T>C
Chr1	1856098	T>C
Chr1	1856565	A>G
Chr1	1857207	T>C
Chr1	1872999	A>G
Chr1	1875929	T>C
Chr1	1879064	C>G
Chr1	1880411	T>C
Chr1	1880608	T>C
Chr1	1885252	T>G
Chr1	1885253	T>C
Chr1	1887465	T>G
Chr1	1888016	G>A
Chr1	1896722	C>T
Chr1	1897139	C>A
Chr1	1897371	A>G
Chr1	1897564	C>T
Chr1	1898250	T>A
Chr1	1899085	G>A
Chr1	1909179	A>T
Chr1	1911714	A>G
Chr1	1915792	C>T
Chr1	1916249	G>A
Chr1	1918007	A>C
Chr1	1926537	A>G
Chr1	1941874	A>C
Chr1	1948294	T>C
Chr1	1950211	T>C
Chr1	1951427	T>A
Chr1	1952498	C>T
Chr1	1953348	T>C
Chr1	1961853	T>A
Chr1	1976637	A>G
Chr1	1976773	G>A
Chr1	1977873	G>A
Chr1	1978218	A>G
Chr1	1978717	T>C
Chr1	1982133	G>A
Chr1	1983270	C>T
Chr1	1983288	A>G
Chr1	1993473	C>T
Chr1	1995544	C>A
Chr1	1999275	T>A
Chr1	2011022	C>T
Chr1	2011344	A>G
Chr1	2025718	A>G
Chr1	2039226	T>A
Chr1	2046518	C>T
Chr1	2047961	G>A
Chr1	2061280	T>C
Chr1	2079298	T>C
Chr1	2096112	G>C
Chr1	2114848	G>C
Chr1	2121987	C>T
Chr1	2130121	C>A
Chr1	2130284	T>A
Chr1	2130288	A>G
Chr1	2130432	G>A
Chr1	2130844	A>G
Chr1	2131003	T>C
Chr1	2131019	A>G
Chr1	2131094	A>G
Chr1	2131199	C>T
Chr1	2131254	C>A
Chr1	2131864	T>G
Chr1	2131905	C>T
Chr1	2155388	G>A
Chr1	2159901	A>T
Chr1	2162763	A>C
Chr1	2163310	A>G
Chr1	2163556	T>C
Chr1	2163643	A>C
Chr1	2164006	C>T
Chr1	2164069	T>C
Chr1	2164073	T>G
Chr1	2165109	A>G
Chr1	2165352	G>A
Chr1	2165784	G>T
Chr1	2167265	T>C
Chr1	2167312	T>G
Chr1	2169625	C>T
Chr1	2169861	G>A
Chr1	2169896	G>A
Chr1	2169934	C>T
Chr1	2169938	T>C
Chr1	2169949	C>T
Chr1	2169975	C>T
Chr1	2170037	T>C
Chr1	2170039	A>G
Chr1	2170103	G>A
Chr1	2170149	G>A
Chr1	2170213	A>C
Chr1	2170214	G>A
Chr1	2170228	A>G
Chr1	2170264	G>A
Chr1	2170267	T>C
Chr1	2170268	G>A
Chr1	2170312	C>T
Chr1	2170369	A>G
Chr1	2170531	G>C
Chr1	2170553	T>C
Chr1	2170738	C>T
Chr1	2170820	C>T
Chr1	2170832	T>C
Chr1	2170843	G>A
Chr1	2170856	A>G
Chr1	2170876	C>T
Chr1	2171350	G>T
Chr1	2171453	C>G
Chr1	2171526	G>A
Chr1	2171538	T>C
Chr1	2171550	T>C
Chr1	2171582	C>T
Chr1	2171620	C>G
Chr1	2171645	A>G
Chr1	2171725	A>G
Chr1	2171908	G>A
Chr1	2171976	G>A
Chr1	2171983	G>A
Chr1	2171990	T>C
Chr1	2172085	T>C
Chr1	2172272	C>T
Chr1	2172526	G>A
Chr1	2172545	G>T
Chr1	2172554	G>A
Chr1	2172620	T>C
Chr1	2172621	T>C
Chr1	2172642	T>C
Chr1	2172643	T>C
Chr1	2172661	C>T
Chr1	2172686	A>C
Chr1	2172759	A>G
Chr1	2172840	T>C
Chr1	2172915	A>G
Chr1	2173245	C>G
Chr1	2173522	A>G
Chr1	2173657	A>G
Chr1	2173691	A>G
Chr1	2173717	C>T
Chr1	2173746	T>G
Chr1	2173764	A>G
Chr1	2173830	A>G
Chr1	2173988	T>C
Chr1	2174055	T>C
Chr1	2174066	G>T
Chr1	2174072	G>A
Chr1	2174755	G>A
Chr1	2175376	A>G
Chr1	2175532	C>A
Chr1	2175562	G>A
Chr1	2176037	T>C
Chr1	2176040	T>C
Chr1	2176041	C>A
Chr1	2176077	C>T
Chr1	2176106	A>T
Chr1	2176134	A>G
Chr1	2176249	C>T
Chr1	2176261	A>G
Chr1	2176264	A>G
Chr1	2176361	T>C
Chr1	2176695	C>A
Chr1	2176787	C>T
Chr1	2176898	T>C
Chr1	2176917	C>T
Chr1	2176946	A>G
Chr1	2176952	G>A
Chr1	2176956	G>T
Chr1	2186985	C>T
Chr1	2187413	G>A
Chr1	2196944	G>A
Chr1	2203344	A>G
Chr1	2204680	C>T
Chr1	2204757	T>A
Chr1	2204808	C>T
Chr1	2205343	A>G
Chr1	2205473	C>G
Chr1	2205710	G>A
Chr1	2205827	T>A
Chr1	2205852	C>T
Chr1	2205861	G>A
Chr1	2205936	G>A
Chr1	2206439	T>C
Chr1	2206492	A>G
Chr1	2206571	T>C
Chr1	2206573	G>T
Chr1	2206596	T>G
Chr1	2206830	C>G
Chr1	2206904	A>T
Chr1	2209443	A>G
Chr1	2210227	C>T
Chr1	2210492	C>A
Chr1	2210636	G>A
Chr1	2210763	T>C
Chr1	2210890	C>T
Chr1	2211011	G>A
Chr1	2211551	A>G
Chr1	2212044	C>T
Chr1	2212144	G>A
Chr1	2212657	T>A
Chr1	2212941	A>G
Chr1	2213232	G>A
Chr1	2213507	G>T
Chr1	2213519	A>G
Chr1	2213558	T>C
Chr1	2213723	A>C
Chr1	2213917	A>G
Chr1	2214633	T>A
Chr1	2215199	A>G
Chr1	2217397	G>A
Chr1	2217410	G>C
Chr1	2217595	C>T
Chr1	2218642	A>C
Chr1	2218757	G>A
Chr1	2220821	G>A
Chr1	2220862	T>G
Chr1	2220865	C>T
Chr1	2221105	G>A
Chr1	2221283	A>G
Chr1	2221338	G>A
Chr1	2221403	A>C
Chr1	2221619	A>G
Chr1	2221876	A>G
Chr1	2222044	A>C
Chr1	2222195	G>A
Chr1	2222307	G>A
Chr1	2222502	G>A
Chr1	2223015	A>G
Chr1	2223572	G>C
Chr1	2223834	T>G
Chr1	2224641	A>G
Chr1	2224689	C>T
Chr1	2224720	T>C
Chr1	2225167	G>T
Chr1	2225457	C>T
Chr1	2225582	C>T
Chr1	2225590	G>T
Chr1	2225731	C>T
Chr1	2225739	A>G
Chr1	2225985	G>A
Chr1	2226019	A>T
Chr1	2226143	A>T
Chr1	2226675	C>T
Chr1	2226818	A>G
Chr1	2226869	G>A
Chr1	2226962	A>G
Chr1	2226995	C>T
Chr1	2227047	G>A
Chr1	2227273	T>C
Chr1	2227450	A>G
Chr1	2227988	G>A
Chr1	2228034	C>G
Chr1	2228155	C>T
Chr1	2228291	G>A
Chr1	2228487	A>G
Chr1	2229292	T>G
Chr1	2229431	A>G
Chr1	2229529	G>C
Chr1	2229806	C>T
Chr1	2230316	G>A
Chr1	2230418	T>C
Chr1	2230430	G>A
Chr1	2230490	T>C
Chr1	2230547	A>T
Chr1	2230565	A>G
Chr1	2230667	T>G
Chr1	2230697	A>G
Chr1	2230729	G>A
Chr1	2230761	G>A
Chr1	2230862	A>C
Chr1	2230868	G>T
Chr1	2230910	G>A
Chr1	2230941	T>C
Chr1	2231106	A>C
Chr1	2231816	G>A
Chr1	2231827	C>T
Chr1	2232418	T>C
Chr1	2232748	A>T
Chr1	2232782	G>A
Chr1	2232799	A>G
Chr1	2232886	G>A
Chr1	2232929	G>A
Chr1	2233001	A>G
Chr1	2233041	G>A
Chr1	2233392	A>T
Chr1	2233404	A>G
Chr1	2233413	A>G
Chr1	2233557	G>A
Chr1	2233574	A>G
Chr1	2233604	C>T
Chr1	2233620	T>C
Chr1	2233647	C>T
Chr1	2234674	A>T
Chr1	2234679	A>G
Chr1	2234904	T>C
Chr1	2234944	A>C
Chr1	2235501	A>C
Chr1	2235529	T>C
Chr1	2235941	C>T
Chr1	2235989	C>T
Chr1	2236160	T>C
Chr1	2237039	C>G
Chr1	2237345	G>A
Chr1	2237366	C>A
Chr1	2237391	C>T
Chr1	2237411	A>G
Chr1	2237510	G>A
Chr1	2237520	G>A
Chr1	2237534	A>C
Chr1	2237555	T>A
Chr1	2240489	A>C
Chr1	2241125	A>T
Chr1	2241542	C>A
Chr1	2243253	T>A
Chr1	2243262	A>C
Chr1	2243320	T>G
Chr1	2243343	A>C
Chr1	2243680	A>G
Chr1	2243863	G>A
Chr1	2244726	C>T
Chr1	2245652	T>C
Chr1	2245878	C>T
Chr1	2246652	G>A
Chr1	2246865	T>G
Chr1	2247537	T>C
Chr1	2247841	T>C
Chr1	2248207	A>G
Chr1	2248376	A>G
Chr1	2248385	G>A
Chr1	2248452	T>C
Chr1	2248625	A>G
Chr1	2249424	T>A
Chr1	2249721	G>T
Chr1	2250188	G>A
Chr1	2251857	A>C
Chr1	2253019	A>G
Chr1	2253477	G>A
Chr1	2253497	C>A
Chr1	2253579	C>A
Chr1	2253864	C>A
Chr1	2253978	G>T
Chr1	2254250	C>T
Chr1	2254276	C>T
Chr1	2254382	C>G
Chr1	2254489	T>A
Chr1	2254692	C>T
Chr1	2254895	T>G
Chr1	2254992	C>T
Chr1	2255760	C>T
Chr1	2255934	C>T
Chr1	2257984	A>G
Chr1	2258401	C>A
Chr1	2258594	A>G
Chr1	2259429	G>A
Chr1	2259870	G>C
Chr1	2260722	C>A
Chr1	2260740	A>C
Chr1	2261261	C>T
Chr1	2262027	G>C
Chr1	2262035	G>C
Chr1	2262073	A>C
Chr1	2262076	A>C
Chr1	2262077	A>G
Chr1	2262196	G>T
Chr1	2262407	A>G
Chr1	2262425	G>C
Chr1	2262467	T>C
Chr1	2262509	A>G
Chr1	2262601	G>A
Chr1	2262628	G>A
Chr1	2262663	C>T
Chr1	2262689	A>G
Chr1	2262921	A>G
Chr1	2262959	C>A
Chr1	2263143	C>T
Chr1	2263261	G>A
Chr1	2263694	G>C
Chr1	2264231	C>T
Chr1	2264623	G>A
Chr1	2264732	G>A
Chr1	2264745	A>G
Chr1	2264787	A>G
Chr1	2264970	C>T
Chr1	2265046	T>C
Chr1	2265083	T>C
Chr1	2265097	A>T
Chr1	2265254	A>T
Chr1	2265340	G>A
Chr1	2265348	T>C
Chr1	2265362	C>A
Chr1	2265374	A>G
Chr1	2265399	G>T
Chr1	2265417	C>T
Chr1	2265467	T>C
Chr1	2265518	A>G
Chr1	2266431	T>C
Chr1	2266459	T>C
Chr1	2266468	T>C
Chr1	2266649	G>C
Chr1	2266734	T>A
Chr1	2266821	A>G
Chr1	2267574	G>A
Chr1	2267682	C>T
Chr1	2267699	T>C
Chr1	2267705	C>T
Chr1	2267775	T>C
Chr1	2267796	T>C
Chr1	2267855	T>C
Chr1	2268178	C>T
Chr1	2268191	T>G
[truncated: 251,297+ more rows]

## Sheet: InDels
Additional file 4. Comparative genomic analysis between KitaakeX and Nipponbare
Chromosome	Position	Size (bp)	Variation Type
Chr1	4250	3	Insertion
Chr1	4266	1	Insertion
Chr1	4280	1	Deletion
Chr1	24066	1	Insertion
Chr1	31195	6	Deletion
Chr1	32972	3	Deletion
Chr1	97053	2	Deletion
Chr1	118675	1	Insertion
Chr1	128810	1	Insertion
Chr1	135120	1	Insertion
Chr1	191931	1	Deletion
Chr1	196319	3	Deletion
Chr1	203378	8	Insertion
Chr1	212603	1	Deletion
Chr1	222699	3	Insertion
Chr1	223320	6	Deletion
Chr1	250756	2	Deletion
Chr1	253442	24	Deletion
Chr1	258262	2	Deletion
Chr1	288032	3	Deletion
Chr1	289748	1	Insertion
Chr1	297327	3	Insertion
Chr1	298310	4	Insertion
Chr1	311186	1	Insertion
Chr1	317402	2	Insertion
Chr1	321380	1	Deletion
Chr1	330390	1	Insertion
Chr1	332222	2	Deletion
Chr1	370576	1	Deletion
Chr1	385479	1	Insertion
Chr1	385682	1	Deletion
Chr1	397872	1	Deletion
Chr1	402198	1	Deletion
Chr1	417342	2	Insertion
Chr1	419793	1	Deletion
Chr1	420503	1	Insertion
Chr1	427048	1	Deletion
Chr1	428693	1	Insertion
Chr1	436568	1	Deletion
Chr1	446686	1	Insertion
Chr1	459051	1	Insertion
Chr1	471233	12	Insertion
Chr1	473159	1	Insertion
Chr1	500718	2	Insertion
Chr1	500727	1	Insertion
Chr1	500810	1	Insertion
Chr1	500814	1	Deletion
Chr1	500822	2	Deletion
Chr1	500825	1	Deletion
Chr1	501002	1	Insertion
Chr1	501613	1	Insertion
Chr1	505323	1	Insertion
Chr1	507335	1	Insertion
Chr1	521071	4	Insertion
Chr1	526021	3	Insertion
Chr1	557297	38	Insertion
Chr1	559998	1	Deletion
Chr1	560401	1	Deletion
Chr1	560822	1	Deletion
Chr1	563385	1	Deletion
Chr1	567739	1	Deletion
Chr1	575388	1	Insertion
Chr1	578012	2	Deletion
Chr1	592294	10	Deletion
Chr1	626276	2	Deletion
Chr1	682012	1	Insertion
Chr1	729364	1	Deletion
Chr1	750085	1	Deletion
Chr1	784216	2	Insertion
Chr1	793406	2	Insertion
Chr1	793437	2	Insertion
Chr1	850230	1	Insertion
Chr1	861866	1	Insertion
Chr1	862548	2	Deletion
Chr1	871641	3	Insertion
Chr1	886059	4	Deletion
Chr1	902169	29	Insertion
Chr1	902376	30	Insertion
Chr1	911894	1	Insertion
Chr1	914306	1	Insertion
Chr1	938568	2	Deletion
Chr1	1019821	1	Insertion
Chr1	1050472	3	Insertion
Chr1	1052188	1	Insertion
Chr1	1053607	1	Deletion
Chr1	1053631	1	Insertion
Chr1	1053957	4	Deletion
Chr1	1060652	1	Insertion
Chr1	1062118	1	Deletion
Chr1	1065567	1	Deletion
Chr1	1065599	1	Deletion
Chr1	1067383	2	Insertion
Chr1	1067615	1	Insertion
Chr1	1067755	1	Deletion
Chr1	1068020	1	Deletion
Chr1	1068337	1	Deletion
Chr1	1068801	3	Insertion
Chr1	1068802	1	Insertion
Chr1	1068817	1	Insertion
Chr1	1068945	2	Deletion
Chr1	1069015	6	Deletion
Chr1	1069022	1	Deletion
Chr1	1069226	1	Deletion
Chr1	1073277	1	Deletion
Chr1	1075369	3	Insertion
Chr1	1078959	2	Insertion
Chr1	1079443	2	Deletion
Chr1	1079585	17	Deletion
Chr1	1079753	6	Insertion
Chr1	1079754	2	Insertion
Chr1	1079915	5	Insertion
Chr1	1079916	4	Insertion
Chr1	1079917	2	Insertion
Chr1	1079921	2	Insertion
Chr1	1079971	4	Insertion
Chr1	1080165	2	Insertion
Chr1	1080166	1	Insertion
Chr1	1080182	6	Deletion
Chr1	1080278	3	Deletion
Chr1	1080304	3	Deletion
Chr1	1080309	1	Deletion
Chr1	1080315	11	Deletion
Chr1	1080477	1	Deletion
Chr1	1080590	6	Insertion
Chr1	1080646	2	Deletion
Chr1	1080672	1	Insertion
Chr1	1080759	3	Deletion
Chr1	1080901	1	Deletion
Chr1	1080904	2	Deletion
Chr1	1081728	1	Insertion
Chr1	1082505	2	Deletion
Chr1	1083071	5	Deletion
Chr1	1103496	1	Deletion
Chr1	1106739	1	Insertion
Chr1	1108814	1	Deletion
Chr1	1111603	1	Deletion
Chr1	1116162	1	Insertion
Chr1	1117214	5	Insertion
Chr1	1118158	1	Insertion
Chr1	1128021	4	Deletion
Chr1	1128996	2	Deletion
Chr1	1133513	70	Deletion
Chr1	1133638	2	Insertion
Chr1	1134113	6	Deletion
Chr1	1135403	6	Deletion
Chr1	1136266	1	Deletion
Chr1	1146140	2	Insertion
Chr1	1152902	4	Insertion
Chr1	1154982	1	Deletion
Chr1	1170769	1	Insertion
Chr1	1175062	5	Deletion
Chr1	1184068	1	Deletion
Chr1	1188966	1	Insertion
Chr1	1190312	2	Deletion
Chr1	1205419	3	Insertion
Chr1	1223861	1	Deletion
Chr1	1224547	5	Insertion
Chr1	1247940	9	Deletion
Chr1	1264925	2	Insertion
Chr1	1265668	1	Insertion
Chr1	1279511	1	Insertion
Chr1	1288537	2	Deletion
Chr1	1292116	1	Insertion
Chr1	1305989	3	Deletion
Chr1	1308682	1	Insertion
Chr1	1311745	5	Insertion
Chr1	1311868	4	Deletion
Chr1	1311883	1	Insertion
Chr1	1321494	2	Insertion
Chr1	1342021	7	Insertion
Chr1	1344996	4	Deletion
Chr1	1347253	2	Deletion
Chr1	1347284	4	Insertion
Chr1	1347347	2	Deletion
Chr1	1347372	2	Insertion
Chr1	1347378	2	Insertion
Chr1	1347512	4	Insertion
Chr1	1355876	1	Insertion
Chr1	1364149	1	Deletion
Chr1	1372561	1	Deletion
Chr1	1379878	1	Deletion
Chr1	1380278	2	Insertion
Chr1	1380846	18	Deletion
Chr1	1385667	18	Insertion
Chr1	1385723	1	Insertion
Chr1	1394023	3	Insertion
Chr1	1396721	1	Insertion
Chr1	1397843	1	Deletion
Chr1	1398814	1	Insertion
Chr1	1399127	1	Deletion
Chr1	1399259	2	Deletion
Chr1	1399286	3	Deletion
Chr1	1417535	5	Deletion
Chr1	1417543	1	Deletion
Chr1	1418706	1	Insertion
Chr1	1418946	1	Deletion
Chr1	1419112	2	Insertion
Chr1	1419197	3	Deletion
Chr1	1419348	1	Insertion
Chr1	1419720	5	Insertion
Chr1	1420962	13	Insertion
Chr1	1421005	1	Insertion
Chr1	1421046	1	Insertion
Chr1	1421051	2	Insertion
Chr1	1426783	11	Insertion
Chr1	1426784	1	Insertion
Chr1	1427148	1	Insertion
Chr1	1427368	4	Deletion
Chr1	1427515	3	Deletion
Chr1	1427578	1	Deletion
Chr1	1428016	3	Deletion
Chr1	1428026	5	Deletion
Chr1	1428064	54	Deletion
Chr1	1428120	7	Deletion
Chr1	1428183	1	Insertion
Chr1	1428515	3	Deletion
Chr1	1428940	3	Insertion
Chr1	1428997	41	Deletion
Chr1	1429040	2	Deletion
Chr1	1429044	6	Deletion
Chr1	1429135	1	Deletion
Chr1	1429212	1	Insertion
Chr1	1429239	3	Insertion
Chr1	1429975	3	Insertion
Chr1	1429976	1	Insertion
Chr1	1431548	3	Deletion
Chr1	1431553	2	Deletion
Chr1	1431558	1	Deletion
Chr1	1431646	3	Deletion
Chr1	1431724	1	Insertion
Chr1	1431750	6	Insertion
Chr1	1431755	4	Insertion
Chr1	1431756	1	Insertion
Chr1	1431759	1	Insertion
Chr1	1431760	2	Insertion
Chr1	1431763	1	Insertion
Chr1	1431765	1	Insertion
Chr1	1431769	1	Insertion
Chr1	1431912	3	Deletion
Chr1	1431916	2	Deletion
Chr1	1431934	3	Insertion
Chr1	1431945	8	Insertion
Chr1	1432637	9	Deletion
Chr1	1432676	5	Deletion
Chr1	1432684	1	Deletion
Chr1	1432754	1	Deletion
Chr1	1432756	1	Deletion
Chr1	1432758	1	Deletion
Chr1	1432763	3	Deletion
Chr1	1432939	4	Deletion
Chr1	1432944	1	Deletion
Chr1	1432948	6	Deletion
Chr1	1432956	8	Deletion
Chr1	1434015	1	Insertion
Chr1	1434585	3	Deletion
Chr1	1434591	3	Deletion
Chr1	1434731	3	Deletion
Chr1	1434783	1	Insertion
Chr1	1435549	1	Insertion
Chr1	1435759	4	Insertion
Chr1	1435779	7	Deletion
Chr1	1435802	2	Insertion
Chr1	1435803	1	Insertion
Chr1	1435886	1	Deletion
Chr1	1436270	12	Insertion
Chr1	1436548	7	Insertion
Chr1	1436550	2	Insertion
Chr1	1436708	1	Deletion
Chr1	1436711	1	Deletion
Chr1	1436713	2	Deletion
Chr1	1436778	2	Deletion
Chr1	1436933	1	Insertion
Chr1	1436957	1	Deletion
Chr1	1436959	2	Deletion
Chr1	1436962	2	Deletion
Chr1	1437101	2	Insertion
Chr1	1437108	6	Insertion
Chr1	1437180	2	Insertion
Chr1	1437320	3	Deletion
Chr1	1437446	2	Insertion
Chr1	1438426	1	Deletion
Chr1	1440783	3	Deletion
Chr1	1441074	1	Deletion
Chr1	1445166	1	Deletion
Chr1	1449149	1	Insertion
Chr1	1449154	2	Insertion
Chr1	1449156	4	Insertion
Chr1	1449157	4	Insertion
Chr1	1449158	1	Insertion
Chr1	1449598	1	Deletion
Chr1	1451402	1	Deletion
Chr1	1456172	9	Insertion
Chr1	1456343	13	Deletion
Chr1	1456383	1	Insertion
Chr1	1456520	1	Deletion
Chr1	1456554	4	Insertion
Chr1	1456949	26	Insertion
Chr1	1456978	1	Deletion
Chr1	1457284	3	Deletion
Chr1	1457503	1	Insertion
Chr1	1457843	2	Insertion
Chr1	1467249	1	Deletion
Chr1	1468287	1	Deletion
Chr1	1472040	23	Insertion
Chr1	1472084	1	Insertion
Chr1	1472250	2	Insertion
Chr1	1472818	2	Deletion
Chr1	1473050	1	Deletion
Chr1	1473306	1	Insertion
Chr1	1474125	1	Deletion
Chr1	1474332	1	Deletion
Chr1	1476149	2	Insertion
Chr1	1476150	2	Insertion
Chr1	1476152	4	Insertion
Chr1	1476207	2	Deletion
Chr1	1476219	2	Deletion
Chr1	1478000	16	Insertion
Chr1	1478442	2	Insertion
Chr1	1478466	2	Deletion
Chr1	1478531	8	Insertion
Chr1	1478706	3	Deletion
Chr1	1481960	18	Insertion
Chr1	1482591	23	Deletion
Chr1	1483311	6	Insertion
Chr1	1483333	1	Deletion
Chr1	1483350	32	Insertion
Chr1	1483407	2	Deletion
Chr1	1483571	1	Insertion
Chr1	1483605	1	Insertion
Chr1	1483942	1	Insertion
Chr1	1485047	1	Deletion
Chr1	1486188	1	Deletion
Chr1	1492330	1	Insertion
Chr1	1492608	3	Deletion
Chr1	1546323	1	Deletion
Chr1	1546327	1	Deletion
Chr1	1546396	2	Deletion
Chr1	1546410	2	Insertion
Chr1	1546412	1	Insertion
Chr1	1546415	5	Insertion
Chr1	1546461	6	Deletion
Chr1	1546833	1	Deletion
Chr1	1546843	1	Deletion
Chr1	1548405	1	Insertion
Chr1	1548414	1	Deletion
Chr1	1548419	2	Deletion
Chr1	1548508	1	Deletion
Chr1	1548539	1	Deletion
Chr1	1548797	1	Insertion
Chr1	1548800	1	Deletion
Chr1	1548912	1	Insertion
Chr1	1548913	2	Insertion
Chr1	1548998	2	Insertion
Chr1	1549020	1	Deletion
Chr1	1549031	2	Insertion
Chr1	1549035	1	Deletion
Chr1	1549069	6	Insertion
Chr1	1549092	4	Insertion
Chr1	1549484	4	Insertion
Chr1	1549614	4	Deletion
Chr1	1549733	1	Deletion
Chr1	1549780	1	Deletion
Chr1	1549831	1	Deletion
Chr1	1549972	1	Insertion
Chr1	1549990	4	Insertion
Chr1	1550128	52	Deletion
Chr1	1550236	1	Insertion
Chr1	1550312	6	Deletion
Chr1	1550372	1	Deletion
Chr1	1550768	4	Insertion
Chr1	1551192	1	Deletion
Chr1	1551311	1	Insertion
Chr1	1551551	3	Insertion
Chr1	1551778	9	Deletion
Chr1	1551992	1	Deletion
Chr1	1552114	1	Deletion
Chr1	1552303	1	Insertion
Chr1	1552316	3	Deletion
Chr1	1552361	3	Insertion
Chr1	1552445	2	Insertion
Chr1	1552655	2	Insertion
Chr1	1552761	3	Deletion
Chr1	1552808	1	Deletion
Chr1	1552880	1	Deletion
Chr1	1552888	9	Deletion
Chr1	1552902	2	Deletion
Chr1	1552906	1	Deletion
Chr1	1552941	2	Deletion
Chr1	1553557	3	Insertion
Chr1	1554441	1	Insertion
Chr1	1555996	3	Deletion
Chr1	1556000	1	Deletion
Chr1	1556217	1	Insertion
Chr1	1556223	1	Deletion
Chr1	1556461	6	Deletion
Chr1	1556504	1	Deletion
Chr1	1556540	4	Deletion
Chr1	1556549	3	Deletion
Chr1	1556577	4	Insertion
Chr1	1556707	2	Insertion
Chr1	1557810	1	Deletion
Chr1	1557940	1	Deletion
Chr1	1558130	1	Insertion
Chr1	1558251	1	Insertion
Chr1	1558270	14	Insertion
Chr1	1558293	7	Deletion
Chr1	1558505	1	Deletion
Chr1	1558528	1	Deletion
Chr1	1558688	6	Insertion
Chr1	1558822	1	Insertion
Chr1	1559737	4	Deletion
Chr1	1559793	5	Deletion
Chr1	1559997	15	Insertion
Chr1	1566577	1	Insertion
Chr1	1568013	1	Insertion
Chr1	1568150	2	Deletion
Chr1	1568452	2	Insertion
Chr1	1568453	1	Insertion
Chr1	1568454	3	Insertion
Chr1	1568696	5	Deletion
Chr1	1568888	5	Insertion
Chr1	1568891	1	Insertion
Chr1	1568905	9	Insertion
Chr1	1568982	3	Deletion
Chr1	1570116	4	Deletion
Chr1	1570207	10	Insertion
Chr1	1570585	3	Insertion
Chr1	1571342	2	Insertion
Chr1	1572236	5	Deletion
Chr1	1572320	6	Deletion
Chr1	1572540	15	Deletion
Chr1	1572560	6	Deletion
Chr1	1572957	2	Deletion
Chr1	1573080	5	Insertion
Chr1	1573110	9	Deletion
Chr1	1573594	2	Deletion
Chr1	1573664	3	Deletion
Chr1	1573668	5	Deletion
Chr1	1573717	2	Deletion
Chr1	1573721	10	Deletion
Chr1	1573745	1	Deletion
Chr1	1573905	1	Deletion
Chr1	1573908	2	Deletion
Chr1	1573949	1	Insertion
Chr1	1574992	1	Deletion
Chr1	1575052	4	Deletion
Chr1	1575057	1	Deletion
Chr1	1575079	1	Deletion
Chr1	1575129	6	Deletion
Chr1	1575211	12	Insertion
Chr1	1575227	3	Insertion
Chr1	1575364	1	Insertion
Chr1	1575377	2	Insertion
Chr1	1575403	6	Deletion
Chr1	1575467	3	Deletion
Chr1	1575473	2	Deletion
Chr1	1575522	1	Insertion
Chr1	1575574	7	Insertion
Chr1	1575636	3	Deletion
Chr1	1575640	1	Deletion
Chr1	1575642	1	Deletion
Chr1	1575644	1	Deletion
Chr1	1575646	1	Deletion
Chr1	1575648	1	Deletion
Chr1	1575653	1	Deletion
Chr1	1575726	3	Deletion
Chr1	1575888	1	Deletion
Chr1	1575898	3	Deletion
Chr1	1576468	2	Deletion
Chr1	1576519	3	Deletion
Chr1	1576619	26	Insertion
Chr1	1576621	6	Insertion
Chr1	1576692	1	Insertion
Chr1	1576741	8	Insertion
Chr1	1576814	18	Insertion
Chr1	1576816	1	Insertion
Chr1	1576817	1	Insertion
Chr1	1576818	1	Insertion
Chr1	1576819	1	Insertion
Chr1	1576820	1	Insertion
Chr1	1576821	1	Insertion
Chr1	1576905	1	Deletion
Chr1	1577069	2	Insertion
Chr1	1577134	3	Insertion
Chr1	1578140	6	Deletion
Chr1	1592027	2	Deletion
Chr1	1608429	12	Insertion
Chr1	1608695	4	Deletion
Chr1	1621872	2	Insertion
Chr1	1624007	32	Insertion
Chr1	1633921	1	Insertion
Chr1	1636346	6	Deletion
Chr1	1637574	1	Insertion
Chr1	1639603	1	Insertion
Chr1	1646309	1	Deletion
Chr1	1667449	1	Deletion
Chr1	1674752	1	Deletion
Chr1	1680589	2	Deletion
Chr1	1685625	4	Insertion
Chr1	1703415	1	Deletion
Chr1	1707072	1	Deletion
Chr1	1708045	2	Deletion
Chr1	1716312	2	Insertion
Chr1	1717461	10	Deletion
Chr1	1721470	34	Insertion
Chr1	1724413	1	Insertion
Chr1	1725903	4	Insertion
Chr1	1727389	2	Deletion
Chr1	1730501	3	Insertion
Chr1	1732308	1	Insertion
Chr1	1734856	4	Deletion
Chr1	1735914	1	Deletion
Chr1	1739407	1	Deletion
Chr1	1752263	5	Deletion
Chr1	1759495	2	Insertion
Chr1	1761299	9	Insertion
Chr1	1764190	1	Deletion
Chr1	1764471	1	Deletion
Chr1	1765590	1	Deletion
Chr1	1768179	3	Deletion
Chr1	1781868	26	Insertion
Chr1	1782144	1	Insertion
Chr1	1782472	1	Deletion
Chr1	1792639	1	Deletion
Chr1	1798568	11	Insertion
Chr1	1800489	1	Deletion
Chr1	1821040	8	Insertion
Chr1	1826897	1	Deletion
Chr1	1830070	2	Insertion
Chr1	1847888	2	Insertion
Chr1	1850771	8	Insertion
Chr1	1852373	1	Deletion
Chr1	1879022	26	Deletion
Chr1	1880715	2	Insertion
Chr1	1886009	4	Insertion
Chr1	1916350	3	Insertion
Chr1	1922479	1	Deletion
Chr1	1927268	1	Deletion
Chr1	1939303	1	Insertion
Chr1	1951882	1	Insertion
Chr1	1955988	2	Deletion
Chr1	1977856	1	Insertion
Chr1	1979435	10	Insertion
Chr1	1982364	1	Deletion
Chr1	1990920	1	Deletion
Chr1	1997586	1	Insertion
Chr1	2001999	2	Deletion
Chr1	2009448	1	Deletion
Chr1	2029676	19	Insertion
Chr1	2043036	1	Deletion
Chr1	2060988	2	Insertion
Chr1	2068721	1	Insertion
Chr1	2071699	7	Deletion
Chr1	2100587	1	Deletion
Chr1	2114511	1	Insertion
Chr1	2118668	1	Deletion
Chr1	2130648	1	Deletion
Chr1	2131032	1	Insertion
Chr1	2152683	2	Deletion
Chr1	2155895	1	Deletion
Chr1	2162806	1	Insertion
Chr1	2162817	1	Deletion
Chr1	2163868	20	Insertion
Chr1	2164619	18	Insertion
Chr1	2169366	13	Insertion
Chr1	2169919	11	Deletion
Chr1	2169959	1	Deletion
Chr1	2170053	2	Deletion
Chr1	2170062	2	Deletion
Chr1	2170577	20	Insertion
Chr1	2170578	9	Insertion
Chr1	2171600	6	Insertion
Chr1	2171610	3	Insertion
Chr1	2171617	1	Insertion
Chr1	2171623	9	Insertion
Chr1	2171625	2	Insertion
Chr1	2171629	2	Insertion
Chr1	2171633	8	Insertion
Chr1	2171635	1	Insertion
Chr1	2171639	10	Insertion
Chr1	2172072	1	Insertion
Chr1	2172091	11	Deletion
Chr1	2172133	7	Deletion
Chr1	2172677	1	Insertion
Chr1	2172950	4	Insertion
Chr1	2173052	1	Deletion
Chr1	2176127	2	Deletion
Chr1	2176616	1	Deletion
Chr1	2176893	1	Insertion
Chr1	2178825	1	Deletion
Chr1	2183431	2	Insertion
Chr1	2184330	1	Insertion
Chr1	2204711	1	Deletion
Chr1	2205820	1	Deletion
Chr1	2206188	3	Insertion
Chr1	2206487	3	Deletion
Chr1	2208777	7	Insertion
Chr1	2208844	6	Insertion
Chr1	2210586	1	Insertion
Chr1	2211367	1	Deletion
Chr1	2213235	1	Deletion
Chr1	2213818	3	Deletion
Chr1	2214758	39	Insertion
Chr1	2218556	1	Insertion
Chr1	2220131	1	Deletion
Chr1	2220424	4	Insertion
Chr1	2222491	1	Insertion
Chr1	2226658	1	Insertion
Chr1	2226682	1	Insertion
Chr1	2226795	9	Insertion
Chr1	2229039	3	Insertion
Chr1	2229715	20	Insertion
Chr1	2230546	1	Deletion
Chr1	2232817	1	Deletion
Chr1	2233342	1	Deletion
Chr1	2233390	1	Insertion
Chr1	2233451	1	Insertion
Chr1	2233708	1	Deletion
Chr1	2234595	12	Insertion
Chr1	2234609	2	Insertion
Chr1	2234628	2	Insertion
Chr1	2234647	1	Insertion
Chr1	2234885	3	Deletion
Chr1	2235429	1	Deletion
Chr1	2237490	9	Insertion
Chr1	2237571	24	Insertion
Chr1	2240959	1	Deletion
Chr1	2241551	2	Deletion
Chr1	2243274	34	Deletion
Chr1	2243346	36	Deletion
Chr1	2245001	4	Deletion
Chr1	2246683	16	Deletion
Chr1	2246985	1	Deletion
Chr1	2247056	2	Deletion
Chr1	2248063	3	Insertion
Chr1	2248268	4	Insertion
Chr1	2248284	1	Deletion
Chr1	2251656	2	Deletion
Chr1	2253585	9	Insertion
Chr1	2254080	2	Insertion
Chr1	2254106	2	Insertion
Chr1	2254171	2	Deletion
Chr1	2254186	1	Deletion
Chr1	2254448	8	Deletion
Chr1	2254459	3	Deletion
Chr1	2254611	1	Insertion
Chr1	2255864	1	Deletion
Chr1	2257879	1	Deletion
Chr1	2257932	40	Deletion
Chr1	2258443	15	Deletion
Chr1	2262023	3	Deletion
Chr1	2262074	1	Insertion
Chr1	2262584	1	Deletion
Chr1	2262788	2	Deletion
Chr1	2263015	4	Deletion
Chr1	2263197	1	Deletion
Chr1	2263692	1	Insertion
Chr1	2267659	4	Insertion
Chr1	2268142	3	Deletion
Chr1	2268286	6	Deletion
Chr1	2268694	12	Insertion
Chr1	2269899	2	Deletion
Chr1	2270288	2	Insertion
Chr1	2270329	1	Insertion
Chr1	2270399	1	Deletion
Chr1	2270556	1	Deletion
Chr1	2272564	4	Deletion
Chr1	2272767	9	Deletion
Chr1	2276673	1	Deletion
Chr1	2278460	2	Insertion
Chr1	2278810	6	Deletion
Chr1	2278817	2	Deletion
Chr1	2283061	55	Deletion
Chr1	2283158	1	Deletion
Chr1	2294431	9	Insertion
Chr1	2294491	1	Insertion
Chr1	2294930	1	Insertion
Chr1	2295122	1	Insertion
Chr1	2296586	1	Insertion
Chr1	2298301	1	Insertion
Chr1	2298789	28	Deletion
Chr1	2299135	1	Deletion
Chr1	2299683	2	Deletion
Chr1	2299730	1	Insertion
Chr1	2299808	1	Deletion
Chr1	2299992	2	Deletion
Chr1	2300491	1	Insertion
Chr1	2300961	1	Insertion
Chr1	2300968	1	Deletion
Chr1	2300995	1	Deletion
Chr1	2301053	1	Insertion
Chr1	2301060	3	Deletion
Chr1	2301123	15	Insertion
Chr1	2301228	12	Deletion
Chr1	2301371	3	Insertion
Chr1	2301378	2	Insertion
Chr1	2301380	1	Insertion
Chr1	2301567	3	Deletion
Chr1	2301599	2	Insertion
Chr1	2301607	5	Insertion
Chr1	2301612	2	Insertion
Chr1	2301614	2	Insertion
Chr1	2301615	2	Insertion
Chr1	2301631	2	Deletion
Chr1	2301635	2	Deletion
Chr1	2301673	21	Insertion
Chr1	2301675	1	Insertion
Chr1	2301871	2	Deletion
Chr1	2302001	1	Deletion
Chr1	2302259	1	Insertion
Chr1	2303101	1	Insertion
Chr1	2303111	1	Insertion
Chr1	2303217	2	Insertion
Chr1	2303247	1	Insertion
Chr1	2303579	4	Insertion
Chr1	2303648	12	Insertion
Chr1	2304961	1	Deletion
Chr1	2314171	1	Insertion
Chr1	2314225	1	Deletion
Chr1	2314231	1	Deletion
Chr1	2315056	2	Deletion
Chr1	2319416	1	Insertion
Chr1	2320100	1	Insertion
Chr1	2321484	3	Deletion
Chr1	2321527	1	Deletion
Chr1	2322745	2	Deletion
Chr1	2322880	11	Insertion
Chr1	2325642	2	Insertion
Chr1	2326381	9	Deletion
Chr1	2328591	1	Insertion
Chr1	2329278	1	Insertion
Chr1	2343334	2	Insertion
Chr1	2344386	1	Insertion
Chr1	2346144	1	Insertion
Chr1	2358402	1	Deletion
Chr1	2358810	1	Insertion
Chr1	2363026	6	Deletion
Chr1	2363052	4	Deletion
Chr1	2363483	7	Insertion
Chr1	2363486	10	Insertion
Chr1	2364710	1	Insertion
Chr1	2364900	1	Deletion
Chr1	2370484	1	Deletion
Chr1	2370626	1	Insertion
Chr1	2373682	7	Deletion
Chr1	2374680	1	Deletion
Chr1	2374741	1	Deletion
Chr1	2375556	1	Insertion
Chr1	2376478	1	Deletion
Chr1	2376945	2	Insertion
Chr1	2377298	15	Deletion
Chr1	2379405	2	Deletion
Chr1	2384550	2	Insertion
Chr1	2385063	2	Insertion
Chr1	2385598	1	Insertion
Chr1	2385667	3	Insertion
Chr1	2385724	1	Deletion
Chr1	2385783	6	Insertion
Chr1	2386437	1	Insertion
Chr1	2386511	1	Insertion
Chr1	2386852	2	Insertion
Chr1	2386854	1	Insertion
Chr1	2386866	1	Insertion
Chr1	2388996	32	Insertion
Chr1	2388997	9	Insertion
Chr1	2389271	13	Deletion
Chr1	2389418	1	Deletion
Chr1	2391521	1	Deletion
Chr1	2397915	1	Deletion
Chr1	2398396	11	Deletion
Chr1	2404872	1	Deletion
Chr1	2405311	1	Deletion
Chr1	2412399	11	Insertion
Chr1	2414084	1	Deletion
Chr1	2414274	1	Deletion
Chr1	2415789	14	Deletion
Chr1	2415804	4	Deletion
Chr1	2416060	3	Insertion
Chr1	2419036	12	Insertion
Chr1	2420846	2	Deletion
Chr1	2421527	6	Deletion
Chr1	2421891	3	Insertion
Chr1	2421899	1	Insertion
Chr1	2422011	2	Insertion
Chr1	2422043	1	Insertion
Chr1	2422203	1	Insertion
Chr1	2422314	1	Insertion
Chr1	2422746	3	Deletion
Chr1	2427210	1	Insertion
Chr1	2427796	2	Deletion
Chr1	2427802	1	Deletion
Chr1	2427917	1	Deletion
Chr1	2428022	7	Deletion
Chr1	2428039	1	Deletion
Chr1	2428041	2	Deletion
Chr1	2428059	2	Deletion
Chr1	2428091	2	Insertion
Chr1	2428092	1	Insertion
Chr1	2428264	1	Deletion
Chr1	2428301	36	Insertion
Chr1	2428379	3	Insertion
Chr1	2428472	2	Deletion
Chr1	2428476	10	Deletion
Chr1	2428540	1	Insertion
Chr1	2428542	1	Insertion
Chr1	2428939	1	Insertion
Chr1	2428940	1	Insertion
Chr1	2428941	1	Insertion
Chr1	2428943	3	Insertion
Chr1	2429266	2	Insertion
Chr1	2429286	1	Deletion
Chr1	2429419	1	Insertion
Chr1	2429763	3	Insertion
Chr1	2429867	4	Insertion
Chr1	2429888	1	Deletion
Chr1	2429894	1	Insertion
Chr1	2430225	12	Deletion
Chr1	2430239	28	Deletion
Chr1	2430354	1	Deletion
Chr1	2430394	3	Insertion
Chr1	2430460	15	Insertion
Chr1	2430463	3	Insertion
Chr1	2430465	1	Insertion
Chr1	2430466	4	Insertion
Chr1	2430568	2	Insertion
Chr1	2430587	2	Insertion
Chr1	2430756	2	Deletion
Chr1	2430944	1	Insertion
Chr1	2430945	6	Insertion
Chr1	2431286	5	Deletion
Chr1	2431294	48	Deletion
Chr1	2431343	7	Deletion
Chr1	2431450	1	Deletion
Chr1	2431518	5	Insertion
Chr1	2431555	1	Deletion
Chr1	2444975	1	Insertion
Chr1	2444980	9	Insertion
Chr1	2445061	1	Insertion
Chr1	2445372	1	Insertion
Chr1	2448701	2	Insertion
Chr1	2450454	1	Deletion
Chr1	2451159	1	Insertion
Chr1	2451361	1	Deletion
Chr1	2452152	1	Insertion
Chr1	2452371	1	Insertion
Chr1	2452565	1	Deletion
Chr1	2452612	1	Insertion
Chr1	2452649	1	Deletion
Chr1	2452668	2	Insertion
Chr1	2452710	1	Deletion
Chr1	2452712	1	Insertion
Chr1	2452810	1	Deletion
Chr1	2453073	11	Deletion
Chr1	2453144	1	Deletion
Chr1	2453209	1	Deletion
Chr1	2453243	1	Insertion
Chr1	2453348	1	Insertion
Chr1	2453592	1	Deletion
Chr1	2453617	1	Deletion
Chr1	2453718	2	Deletion
Chr1	2453722	3	Deletion
Chr1	2453726	1	Deletion
Chr1	2453728	8	Deletion
Chr1	2453740	9	Deletion
Chr1	2453752	9	Deletion
Chr1	2454019	30	Insertion
Chr1	2454156	1	Deletion
Chr1	2455180	3	Insertion
Chr1	2456204	1	Insertion
Chr1	2458018	3	Insertion
Chr1	2458305	1	Insertion
Chr1	2458483	6	Deletion
Chr1	2458617	11	Deletion
Chr1	2460728	11	Deletion
Chr1	2460743	1	Deletion
Chr1	2460891	2	Insertion
Chr1	2460957	6	Insertion
Chr1	2460977	2	Deletion
Chr1	2463051	1	Insertion
Chr1	2463096	1	Deletion
Chr1	2463531	2	Deletion
Chr1	2463893	2	Deletion
Chr1	2463976	3	Insertion
Chr1	2464111	7	Deletion
Chr1	2464449	8	Insertion
Chr1	2464649	1	Insertion
Chr1	2464747	70	Insertion
Chr1	2464750	6	Insertion
Chr1	2464958	2	Insertion
Chr1	2465014	1	Deletion
Chr1	2465343	1	Deletion
Chr1	2465683	1	Deletion
Chr1	2465724	1	Insertion
Chr1	2466965	2	Insertion
Chr1	2466978	11	Insertion
Chr1	2466980	2	Insertion
Chr1	2466994	2	Insertion
Chr1	2467001	1	Deletion
Chr1	2467006	1	Deletion
Chr1	2467013	3	Deletion
Chr1	2467022	1	Deletion
Chr1	2467059	2	Deletion
Chr1	2467086	1	Insertion
Chr1	2467108	1	Insertion
Chr1	2467700	1	Insertion
Chr1	2467778	3	Deletion
Chr1	2468117	5	Deletion
Chr1	2468289	25	Insertion
Chr1	2468455	2	Deletion
Chr1	2468461	1	Deletion
Chr1	2468477	12	Insertion
Chr1	2490936	4	Deletion
Chr1	2491318	3	Insertion
Chr1	2491323	7	Insertion
Chr1	2491324	1	Insertion
Chr1	2491347	2	Deletion
Chr1	2491351	2	Deletion
Chr1	2491355	1	Deletion
Chr1	2491357	1	Deletion
Chr1	2491416	1	Deletion
Chr1	2491672	8	Deletion
Chr1	2491973	2	Deletion
Chr1	2492093	2	Insertion
Chr1	2492095	4	Insertion
Chr1	2493153	1	Insertion
Chr1	2493922	1	Deletion
Chr1	2494821	2	Insertion
Chr1	2495011	11	Deletion
Chr1	2495604	1	Insertion
Chr1	2495635	1	Insertion
Chr1	2495739	2	Insertion
Chr1	2498091	2	Insertion
Chr1	2502126	4	Insertion
Chr1	2504656	1	Insertion
Chr1	2515398	3	Insertion
Chr1	2516314	4	Insertion
Chr1	2516616	1	Insertion
Chr1	2517177	1	Insertion
Chr1	2517671	1	Insertion
Chr1	2518380	1	Insertion
Chr1	2518495	22	Insertion
Chr1	2521049	16	Deletion
Chr1	2522282	10	Deletion
Chr1	2522479	2	Deletion
Chr1	2522519	6	Insertion
Chr1	2523416	1	Deletion
Chr1	2533306	1	Insertion
Chr1	2533501	1	Deletion
Chr1	2533603	1	Deletion
Chr1	2533784	10	Insertion
Chr1	2534778	22	Deletion
Chr1	2535625	2	Deletion
Chr1	2537352	1	Deletion
Chr1	2538309	3	Insertion
Chr1	2538982	7	Insertion
Chr1	2539437	7	Deletion
Chr1	2539934	1	Deletion
Chr1	2540009	2	Insertion
Chr1	2540079	2	Deletion
Chr1	2540502	3	Insertion
Chr1	2540503	1	Insertion
Chr1	2540637	1	Insertion
Chr1	2543880	2	Insertion
Chr1	2566622	6	Deletion
Chr1	2569803	2	Deletion
Chr1	2570703	8	Deletion
Chr1	2571215	1	Insertion
Chr1	2571245	5	Insertion
Chr1	2571269	2	Deletion
Chr1	2571321	1	Insertion
Chr1	2571368	2	Insertion
Chr1	2571369	1	Insertion
Chr1	2571487	2	Deletion
Chr1	2571502	1	Deletion
Chr1	2571504	2	Deletion
Chr1	2571529	1	Insertion
Chr1	2571537	4	Insertion
Chr1	2571538	1	Insertion
Chr1	2572032	3	Deletion
Chr1	2572066	7	Deletion
Chr1	2572102	2	Deletion
Chr1	2572201	3	Insertion
Chr1	2572206	1	Insertion
Chr1	2572210	4	Insertion
Chr1	2572211	2	Insertion
Chr1	2572289	3	Insertion
Chr1	2572382	12	Deletion
Chr1	2572690	3	Insertion
Chr1	2572693	1	Insertion
Chr1	2572718	8	Insertion
Chr1	2572867	4	Insertion
Chr1	2572871	26	Insertion
Chr1	2572873	12	Insertion
Chr1	2572876	4	Insertion
Chr1	2572878	7	Insertion
Chr1	2572879	13	Insertion
Chr1	2574878	2	Deletion
Chr1	2575337	1	Deletion
Chr1	2575471	17	Insertion
Chr1	2575474	5	Insertion
Chr1	2575478	11	Insertion
Chr1	2575797	15	Insertion
Chr1	2576492	6	Deletion
Chr1	2576530	3	Deletion
Chr1	2576696	9	Insertion
Chr1	2576730	4	Insertion
Chr1	2576977	3	Deletion
Chr1	2577047	14	Insertion
Chr1	2577048	3	Insertion
Chr1	2577051	1	Insertion
Chr1	2577052	6	Insertion
Chr1	2577054	1	Insertion
Chr1	2577058	2	Insertion
Chr1	2577060	5	Insertion
Chr1	2577063	4	Insertion
Chr1	2577068	1	Insertion
Chr1	2577069	2	Insertion
Chr1	2578715	2	Insertion
Chr1	2578771	3	Insertion
Chr1	2578853	6	Insertion
Chr1	2578912	8	Insertion
Chr1	2578914	1	Insertion
Chr1	2578915	7	Insertion
Chr1	2579381	1	Insertion
Chr1	2579494	2	Insertion
Chr1	2579539	11	Insertion
Chr1	2579859	1	Deletion
Chr1	2579907	5	Insertion
Chr1	2579913	50	Insertion
Chr1	2579927	3	Insertion
Chr1	2579951	3	Deletion
Chr1	2580052	6	Insertion
Chr1	2580133	2	Deletion
Chr1	2580162	7	Insertion
Chr1	2580213	1	Insertion
Chr1	2580932	1	Deletion
Chr1	2580934	1	Deletion
Chr1	2580936	1	Deletion
Chr1	2580942	1	Deletion
Chr1	2581001	6	Deletion
Chr1	2581111	1	Deletion
Chr1	2581477	1	Insertion
Chr1	2581939	2	Deletion
Chr1	2582008	7	Deletion
Chr1	2582064	2	Insertion
Chr1	2582086	2	Deletion
Chr1	2582089	7	Deletion
Chr1	2582210	4	Insertion
Chr1	2582212	3	Insertion
Chr1	2582446	3	Deletion
Chr1	2582453	3	Deletion
Chr1	2582610	2	Insertion
Chr1	2582629	1	Insertion
Chr1	2582994	30	Insertion
Chr1	2582995	3	Insertion
Chr1	2583497	15	Insertion
Chr1	2583591	1	Deletion
Chr1	2584217	9	Insertion
Chr1	2584310	2	Deletion
Chr1	2585090	9	Deletion
Chr1	2590774	1	Deletion
Chr1	2590889	1	Insertion
Chr1	2590906	1	Insertion
Chr1	2591005	1	Deletion
Chr1	2592676	4	Deletion
Chr1	2593184	4	Insertion
Chr1	2594681	3	Deletion
Chr1	2595324	2	Deletion
Chr1	2595328	3	Deletion
Chr1	2595332	1	Deletion
Chr1	2595336	2	Deletion
Chr1	2595645	1	Insertion
Chr1	2596046	1	Deletion
Chr1	2596341	75	Deletion
Chr1	2596417	5	Deletion
Chr1	2596669	14	Deletion
Chr1	2597151	2	Deletion
Chr1	2598320	1	Deletion
Chr1	2600616	27	Deletion
Chr1	2600680	10	Deletion
Chr1	2600695	1	Deletion
Chr1	2600768	18	Insertion
Chr1	2600796	1	Insertion
Chr1	2600896	4	Insertion
Chr1	2600938	4	Deletion
Chr1	2601053	1	Deletion
Chr1	2601744	1	Insertion
Chr1	2601875	1	Insertion
Chr1	2602567	9	Deletion
Chr1	2602969	2	Insertion
Chr1	2603044	18	Insertion
Chr1	2603131	3	Insertion
Chr1	2603848	21	Insertion
Chr1	2604417	2	Deletion
Chr1	2604505	1	Insertion
Chr1	2604578	2	Deletion
Chr1	2604795	1	Insertion
Chr1	2604819	3	Deletion
Chr1	2604879	1	Deletion
Chr1	2604892	4	Deletion
Chr1	2604899	3	Deletion
Chr1	2604906	2	Deletion
Chr1	2604911	2	Deletion
Chr1	2604915	5	Deletion
Chr1	2604922	1	Deletion
Chr1	2604924	4	Deletion
Chr1	2604989	4	Insertion
Chr1	2605053	1	Deletion
Chr1	2605123	1	Deletion
Chr1	2605286	15	Insertion
Chr1	2605451	1	Deletion
Chr1	2605486	1	Insertion
Chr1	2605490	1	Insertion
Chr1	2605512	2	Deletion
Chr1	2606070	1	Insertion
Chr1	2606076	1	Insertion
Chr1	2606080	4	Deletion
Chr1	2606089	1	Deletion
Chr1	2606293	2	Insertion
Chr1	2606296	1	Insertion
Chr1	2606375	1	Deletion
Chr1	2606860	3	Deletion
Chr1	2606981	27	Deletion
Chr1	2607009	8	Deletion
Chr1	2607020	1	Deletion
Chr1	2607024	1	Deletion
Chr1	2607029	14	Deletion
Chr1	2607110	1	Insertion
Chr1	2607175	7	Deletion
Chr1	2607403	4	Deletion
Chr1	2607607	6	Deletion
Chr1	2607627	2	Deletion
Chr1	2607783	8	Deletion
Chr1	2607809	1	Insertion
Chr1	2607871	1	Insertion
Chr1	2607888	66	Insertion
Chr1	2607891	1	Insertion
Chr1	2607892	3	Insertion
Chr1	2607941	5	Insertion
Chr1	2608026	2	Deletion
Chr1	2608147	5	Deletion
Chr1	2608155	10	Deletion
Chr1	2608228	4	Deletion
Chr1	2608247	2	Deletion
Chr1	2608343	2	Deletion
Chr1	2608425	4	Deletion
Chr1	2608437	2	Deletion
Chr1	2608565	11	Deletion
Chr1	2608608	1	Insertion
Chr1	2608612	1	Deletion
Chr1	2608727	2	Deletion
Chr1	2609062	1	Deletion
Chr1	2609219	3	Deletion
Chr1	2609574	1	Deletion
Chr1	2609821	1	Insertion
Chr1	2609824	1	Insertion
Chr1	2609871	1	Deletion
Chr1	2610121	2	Deletion
Chr1	2610454	2	Insertion
Chr1	2610784	1	Deletion
Chr1	2610791	1	Insertion
Chr1	2610951	11	Insertion
Chr1	2610954	9	Insertion
Chr1	2610955	1	Insertion
Chr1	2610957	1	Insertion
Chr1	2610965	5	Insertion
Chr1	2610968	9	Insertion
Chr1	2611284	1	Deletion
Chr1	2611611	1	Insertion
Chr1	2612077	3	Insertion
Chr1	2612404	1	Deletion
Chr1	2612406	1	Deletion
Chr1	2612411	14	Deletion
Chr1	2619409	4	Insertion
Chr1	2620646	3	Deletion
Chr1	2623777	1	Insertion
Chr1	2627447	1	Insertion
Chr1	2629285	26	Insertion
Chr1	2629899	4	Deletion
Chr1	2631008	3	Insertion
Chr1	2632202	24	Insertion
Chr1	2632290	1	Insertion
Chr1	2632462	1	Deletion
Chr1	2632464	2	Deletion
Chr1	2632740	42	Insertion
Chr1	2633059	1	Insertion
Chr1	2633307	1	Deletion
Chr1	2633881	12	Deletion
Chr1	2643073	2	Deletion
Chr1	2647049	1	Deletion
Chr1	2647452	1	Insertion
Chr1	2650600	4	Deletion
Chr1	2650643	1	Insertion
Chr1	2651204	4	Insertion
Chr1	2654439	3	Deletion
Chr1	2656669	1	Insertion
Chr1	2657126	3	Deletion
Chr1	2658369	3	Insertion
Chr1	2658402	1	Deletion
Chr1	2658424	1	Insertion
Chr1	2658491	2	Deletion
Chr1	2659346	1	Insertion
Chr1	2659911	2	Insertion
Chr1	2660329	39	Insertion
Chr1	2660923	1	Deletion
Chr1	2661072	1	Deletion
Chr1	2661232	1	Deletion
Chr1	2662074	4	Deletion
Chr1	2662358	12	Deletion
Chr1	2662989	1	Deletion
Chr1	2663550	1	Deletion
Chr1	2663934	1	Deletion
Chr1	2664084	7	Insertion
Chr1	2664372	1	Deletion
Chr1	2664633	1	Deletion
Chr1	2664883	1	Insertion
Chr1	2665715	1	Deletion
Chr1	2665854	1	Deletion
Chr1	2666007	1	Deletion
Chr1	2666923	7	Deletion
Chr1	2696324	2	Deletion
Chr1	2696445	20	Deletion
Chr1	2696471	43	Deletion
Chr1	2696519	10	Deletion
Chr1	2696530	1	Deletion
Chr1	2696533	6	Deletion
Chr1	2696729	1	Insertion
Chr1	2696769	1	Deletion
Chr1	2698926	2	Deletion
Chr1	2699323	1	Insertion
Chr1	2699378	1	Deletion
Chr1	2704685	1	Insertion
Chr1	2704693	1	Insertion
Chr1	2704694	1	Insertion
Chr1	2704695	1	Insertion
Chr1	2710430	1	Insertion
Chr1	2710678	1	Deletion
Chr1	2717550	2	Insertion
Chr1	2717728	1	Insertion
Chr1	2718454	33	Insertion
Chr1	2718790	8	Deletion
Chr1	2718825	2	Deletion
Chr1	2718857	3	Insertion
Chr1	2718943	6	Deletion
Chr1	2719082	2	Insertion
Chr1	2719096	3	Insertion
Chr1	2719238	6	Deletion
Chr1	2719291	9	Insertion
Chr1	2719292	5	Insertion
Chr1	2719294	11	Insertion
Chr1	2719574	1	Insertion
Chr1	2720312	3	Deletion
Chr1	2721932	1	Insertion
Chr1	2721994	1	Insertion
Chr1	2722068	1	Deletion
Chr1	2722224	3	Insertion
Chr1	2722385	3	Deletion
Chr1	2722674	8	Deletion
Chr1	2723276	5	Insertion
Chr1	2723360	1	Insertion
Chr1	2723708	3	Insertion
Chr1	2724539	2	Insertion
Chr1	2724998	4	Insertion
Chr1	2725035	1	Insertion
Chr1	2725199	2	Deletion
Chr1	2725515	1	Insertion
Chr1	2726310	2	Insertion
Chr1	2728380	1	Insertion
Chr1	2730226	1	Deletion
Chr1	2731162	1	Deletion
Chr1	2731219	1	Deletion
Chr1	2732944	12	Deletion
Chr1	2732958	12	Deletion
Chr1	2732972	19	Deletion
Chr1	2734120	1	Insertion
Chr1	2735610	1	Insertion
Chr1	2737438	1	Deletion
Chr1	2737717	1	Deletion
Chr1	2742483	1	Insertion
Chr1	2743368	1	Insertion
Chr1	2743843	1	Insertion
Chr1	2744363	11	Insertion
Chr1	2744365	35	Insertion
Chr1	2744964	2	Deletion
Chr1	2745287	1	Deletion
Chr1	2746240	1	Insertion
Chr1	2749757	1	Deletion
Chr1	2749780	1	Insertion
Chr1	2749878	1	Deletion
Chr1	2749968	4	Deletion
Chr1	2750348	3	Insertion
Chr1	2751287	1	Deletion
Chr1	2751834	1	Deletion
Chr1	2754421	4	Deletion
Chr1	2754432	4	Deletion
Chr1	2754459	1	Deletion
Chr1	2754872	1	Insertion
Chr1	2755372	1	Insertion
Chr1	2755525	15	Insertion
Chr1	2758188	1	Insertion
Chr1	2758578	2	Deletion
Chr1	2759016	1	Deletion
Chr1	2759422	1	Deletion
Chr1	2759591	3	Insertion
Chr1	2760069	1	Deletion
Chr1	2760299	1	Insertion
Chr1	2762142	2	Deletion
Chr1	2762439	6	Deletion
Chr1	2762498	1	Deletion
Chr1	2762504	1	Deletion
Chr1	2762717	19	Insertion
Chr1	2763012	3	Insertion
Chr1	2763358	1	Insertion
Chr1	2763468	5	Deletion
Chr1	2763476	6	Deletion
Chr1	2763484	3	Deletion
Chr1	2763610	7	Insertion
Chr1	2763770	4	Insertion
Chr1	2763851	1	Deletion
Chr1	2764042	14	Deletion
Chr1	2765532	3	Deletion
Chr1	2765626	1	Deletion
Chr1	2765859	1	Insertion
Chr1	2767561	1	Deletion
Chr1	2767825	1	Insertion
Chr1	2768028	12	Deletion
Chr1	2768312	10	Deletion
Chr1	2768789	1	Deletion
Chr1	2768838	3	Insertion
Chr1	2769339	1	Deletion
Chr1	2772101	1	Deletion
Chr1	2772714	1	Deletion
Chr1	2772751	2	Insertion
Chr1	2772752	3	Insertion
Chr1	2772753	2	Insertion
Chr1	2772823	1	Insertion
Chr1	2773442	1	Deletion
Chr1	2773587	21	Deletion
Chr1	2776986	1	Insertion
Chr1	2777194	1	Insertion
Chr1	2777639	7	Insertion
Chr1	2777813	14	Insertion
Chr1	2777820	14	Insertion
Chr1	2778049	4	Insertion
Chr1	2778327	1	Insertion
Chr1	2779543	1	Deletion
Chr1	2779930	1	Deletion
Chr1	2779938	2	Insertion
Chr1	2781099	4	Deletion
Chr1	2781325	21	Deletion
Chr1	2781349	2	Deletion
Chr1	2781352	1	Deletion
Chr1	2781354	1	Deletion
Chr1	2781358	14	Deletion
Chr1	2782310	1	Insertion
Chr1	2782653	1	Insertion
Chr1	2783450	3	Deletion
Chr1	2783642	12	Insertion
Chr1	2784111	18	Deletion
Chr1	2784276	4	Deletion
Chr1	2784284	1	Deletion
Chr1	2784286	1	Insertion
Chr1	2784291	4	Deletion
Chr1	2786405	8	Deletion
Chr1	2786414	3	Deletion
Chr1	2786638	4	Deletion
Chr1	2788672	62	Deletion
Chr1	2788809	1	Deletion
Chr1	2789298	1	Insertion
Chr1	2789364	1	Insertion
Chr1	2789521	1	Insertion
Chr1	2790095	72	Deletion
Chr1	2791237	2	Deletion
Chr1	2791241	3	Deletion
Chr1	2791247	1	Insertion
Chr1	2791254	1	Insertion
Chr1	2791761	1	Deletion
Chr1	2791844	1	Insertion
Chr1	2794316	4	Insertion
Chr1	2794349	8	Deletion
Chr1	2794963	1	Deletion
Chr1	2795100	56	Insertion
Chr1	2795494	1	Deletion
Chr1	2795938	3	Deletion
Chr1	2795978	2	Insertion
Chr1	2796422	7	Insertion
Chr1	2796459	2	Deletion
Chr1	2796479	8	Insertion
Chr1	2796494	5	Insertion
Chr1	2796497	1	Insertion
Chr1	2796498	1	Insertion
Chr1	2796619	1	Deletion
Chr1	2796674	2	Insertion
Chr1	2796710	1	Insertion
Chr1	2796965	3	Insertion
Chr1	2797192	2	Deletion
Chr1	2797466	4	Deletion
Chr1	2798612	4	Deletion
Chr1	2799008	1	Insertion
Chr1	2799834	1	Insertion
Chr1	2799936	3	Insertion
Chr1	2800114	1	Deletion
Chr1	2800366	2	Insertion
Chr1	2800518	7	Insertion
Chr1	2800520	1	Insertion
Chr1	2800521	1	Insertion
Chr1	2800550	3	Deletion
Chr1	2800600	12	Deletion
Chr1	2800685	1	Deletion
Chr1	2800700	1	Deletion
Chr1	2800707	1	Deletion
Chr1	2800709	5	Deletion
Chr1	2800715	1	Deletion
Chr1	2800792	3	Deletion
Chr1	2802380	3	Deletion
Chr1	2802643	3	Deletion
Chr1	2803378	8	Insertion
Chr1	2803436	2	Insertion
Chr1	2803474	1	Deletion
Chr1	2803503	1	Insertion
Chr1	2803612	2	Deletion
Chr1	2803697	1	Deletion
Chr1	2803702	2	Deletion
Chr1	2805403	1	Insertion
Chr1	2805429	1	Deletion
Chr1	2805568	1	Deletion
Chr1	2805608	5	Insertion
Chr1	2805807	1	Deletion
Chr1	2806395	1	Deletion
Chr1	2806704	1	Deletion
Chr1	2806706	1	Deletion
Chr1	2806709	1	Insertion
Chr1	2807043	3	Insertion
Chr1	2807630	11	Insertion
Chr1	2807674	1	Insertion
Chr1	2807730	1	Deletion
Chr1	2807732	7	Deletion
Chr1	2807743	5	Deletion
Chr1	2807753	4	Deletion
Chr1	2807776	3	Deletion
Chr1	2807783	3	Deletion
Chr1	2807867	1	Deletion
Chr1	2807910	1	Insertion
Chr1	2807993	1	Deletion
Chr1	2807996	1	Insertion
Chr1	2808190	1	Deletion
Chr1	2808320	4	Insertion
Chr1	2808404	1	Deletion
Chr1	2808646	2	Insertion
Chr1	2808702	2	Insertion
Chr1	2808865	1	Deletion
Chr1	2808867	1	Deletion
Chr1	2809480	1	Deletion
Chr1	2809503	4	Deletion
Chr1	2809814	6	Insertion
Chr1	2809821	1	Insertion
Chr1	2809828	5	Insertion
Chr1	2809831	6	Insertion
Chr1	2809832	2	Insertion
Chr1	2809910	1	Insertion
Chr1	2809997	3	Insertion
Chr1	2810061	7	Insertion
Chr1	2810062	1	Insertion
Chr1	2810063	2	Insertion
Chr1	2810064	3	Insertion
Chr1	2810240	1	Insertion
Chr1	2811122	2	Deletion
Chr1	2811248	1	Deletion
Chr1	2811266	1	Deletion
Chr1	2812745	2	Deletion
Chr1	2812755	8	Deletion
Chr1	2812817	1	Insertion
Chr1	2813096	6	Insertion
Chr1	2813141	3	Deletion
Chr1	2813146	1	Deletion
Chr1	2813152	2	Insertion
Chr1	2813434	2	Deletion
Chr1	2813437	1	Deletion
Chr1	2813439	1	Deletion
Chr1	2813476	4	Insertion
Chr1	2815259	1	Insertion
Chr1	2815377	1	Deletion
Chr1	2815384	1	Deletion
Chr1	2815533	1	Deletion
Chr1	2815576	1	Deletion
Chr1	2815582	1	Deletion
Chr1	2815641	1	Deletion
Chr1	2815703	5	Deletion
Chr1	2816026	1	Deletion
Chr1	2816571	1	Deletion
Chr1	2816602	61	Insertion
Chr1	2816616	1	Insertion
Chr1	2816668	6	Insertion
Chr1	2816859	10	Deletion
Chr1	2817018	1	Deletion
Chr1	2817046	13	Insertion
Chr1	2817210	1	Deletion
Chr1	2817778	1	Insertion
Chr1	2820983	1	Deletion
Chr1	2821327	1	Insertion
Chr1	2823050	34	Deletion
Chr1	2823087	8	Deletion
Chr1	2823097	17	Deletion
Chr1	2823363	2	Insertion
Chr1	2824338	1	Deletion
Chr1	2825428	3	Insertion
Chr1	2825511	2	Deletion
Chr1	2825571	1	Insertion
Chr1	2826138	6	Insertion
Chr1	2826600	10	Insertion
Chr1	2826646	1	Deletion
Chr1	2828601	1	Deletion
Chr1	2829327	1	Deletion
Chr1	2830186	2	Deletion
Chr1	2830196	1	Deletion
Chr1	2830402	10	Deletion
Chr1	2830509	3	Insertion
Chr1	2830512	2	Insertion
Chr1	2830513	2	Insertion
Chr1	2830514	1	Insertion
Chr1	2832404	1	Deletion
Chr1	2833912	3	Deletion
Chr1	2838839	1	Insertion
Chr1	2838871	1	Deletion
Chr1	2838940	2	Deletion
Chr1	2838949	1	Deletion
Chr1	2838955	1	Insertion
Chr1	2839100	40	Deletion
Chr1	2839360	1	Insertion
Chr1	2839442	2	Insertion
Chr1	2840486	1	Deletion
Chr1	2840488	3	Deletion
Chr1	2840514	1	Insertion
Chr1	2840560	1	Deletion
Chr1	2840566	1	Insertion
Chr1	2840575	1	Deletion
Chr1	2840613	15	Insertion
Chr1	2844232	1	Insertion
Chr1	2844242	1	Insertion
Chr1	2845077	12	Deletion
Chr1	2845438	1	Insertion
Chr1	2846111	3	Insertion
Chr1	2846112	1	Insertion
Chr1	2846128	1	Insertion
Chr1	2846160	2	Deletion
Chr1	2846169	1	Deletion
Chr1	2846296	1	Insertion
Chr1	2848440	6	Deletion
Chr1	2848465	1	Insertion
Chr1	2848484	8	Deletion
Chr1	2848733	3	Deletion
Chr1	2848969	1	Deletion
Chr1	2848974	1	Deletion
Chr1	2849102	12	Deletion
Chr1	2849321	1	Insertion
Chr1	2849637	6	Deletion
Chr1	2849646	1	Deletion
Chr1	2850031	1	Insertion
Chr1	2850032	2	Insertion
Chr1	2850115	2	Insertion
Chr1	2852701	1	Deletion
Chr1	2853053	10	Deletion
Chr1	2853064	2	Deletion
Chr1	2854151	1	Insertion
Chr1	2854230	6	Insertion
Chr1	2863679	1	Deletion
Chr1	2864068	1	Insertion
Chr1	2874632	1	Insertion
Chr1	2881616	8	Insertion
Chr1	2882050	1	Deletion
Chr1	2884972	2	Insertion
Chr1	2886799	1	Insertion
Chr1	2888626	1	Insertion
Chr1	2893862	1	Deletion
Chr1	2901632	2	Deletion
Chr1	2907941	1	Insertion
Chr1	2911101	1	Deletion
Chr1	2913398	1	Deletion
Chr1	2913587	3	Insertion
Chr1	2914983	3	Insertion
Chr1	2915424	3	Deletion
Chr1	2917385	13	Deletion
Chr1	2917401	11	Deletion
Chr1	2917550	1	Insertion
Chr1	2917780	3	Insertion
Chr1	2934798	4	Deletion
Chr1	2936180	1	Deletion
Chr1	2936744	8	Insertion
Chr1	2936835	14	Insertion
Chr1	2937015	9	Insertion
Chr1	2937866	2	Deletion
Chr1	2939145	17	Deletion
Chr1	2939538	1	Insertion
Chr1	2939878	16	Insertion
Chr1	2940101	1	Insertion
Chr1	2943331	4	Deletion
Chr1	2943533	1	Deletion
Chr1	2943626	4	Deletion
Chr1	2945314	8	Deletion
Chr1	2946119	1	Deletion
Chr1	2946381	33	Insertion
Chr1	2993507	1	Deletion
Chr1	2994895	1	Insertion
Chr1	3007833	1	Deletion
Chr1	3009241	3	Insertion
Chr1	3009243	1	Insertion
Chr1	3010424	1	Deletion
Chr1	3010893	5	Deletion
Chr1	3015444	4	Insertion
Chr1	3015504	3	Deletion
Chr1	3015510	1	Insertion
Chr1	3015520	1	Deletion
Chr1	3015530	1	Deletion
Chr1	3015540	2	Insertion
Chr1	3015705	48	Deletion
Chr1	3015754	3	Deletion
Chr1	3028113	33	Insertion
Chr1	3043610	23	Insertion
Chr1	3046284	6	Deletion
Chr1	3046293	15	Deletion
Chr1	3046586	1	Insertion
Chr1	3048343	1	Insertion
Chr1	3048404	1	Insertion
Chr1	3048769	39	Deletion
Chr1	3049436	1	Insertion
Chr1	3049564	7	Deletion
Chr1	3050766	2	Insertion
Chr1	3050978	6	Deletion
Chr1	3051496	1	Deletion
Chr1	3051932	1	Insertion
Chr1	3060938	2	Insertion
Chr1	3062343	3	Deletion
Chr1	3062479	3	Insertion
Chr1	3066906	1	Deletion
Chr1	3068489	3	Insertion
Chr1	3070245	2	Insertion
Chr1	3070503	1	Insertion
Chr1	3071487	1	Insertion
Chr1	3071664	3	Deletion
Chr1	3073635	1	Insertion
Chr1	3073637	2	Insertion
Chr1	3073939	6	Deletion
Chr1	3073947	1	Deletion
Chr1	3073952	1	Deletion
Chr1	3073954	1	Deletion
Chr1	3074069	1	Deletion
Chr1	3074072	1	Insertion
Chr1	3076024	2	Insertion
Chr1	3078809	34	Deletion
Chr1	3079164	3	Insertion
Chr1	3079709	21	Deletion
Chr1	3080022	22	Deletion
Chr1	3080386	1	Insertion
Chr1	3080423	4	Insertion
Chr1	3080860	1	Deletion
Chr1	3081107	1	Deletion
Chr1	3081337	8	Deletion
Chr1	3081355	1	Insertion
Chr1	3081521	3	Deletion
Chr1	3081722	3	Insertion
Chr1	3081728	1	Insertion
Chr1	3082125	1	Deletion
Chr1	3082128	1	Deletion
Chr1	3082191	16	Insertion
Chr1	3082243	3	Deletion
Chr1	3082307	2	Insertion
Chr1	3082308	2	Insertion
Chr1	3082325	2	Insertion
Chr1	3082364	5	Insertion
Chr1	3082468	1	Deletion
Chr1	3082470	2	Deletion
Chr1	3082520	7	Deletion
Chr1	3082576	5	Insertion
Chr1	3082703	8	Insertion
Chr1	3082873	2	Deletion
Chr1	3082886	8	Insertion
Chr1	3082958	6	Deletion
Chr1	3083053	5	Deletion
Chr1	3083098	4	Deletion
Chr1	3083104	3	Deletion
Chr1	3083108	3	Deletion
Chr1	3083113	1	Deletion
Chr1	3083135	1	Insertion
Chr1	3083142	1	Deletion
Chr1	3083344	6	Deletion
Chr1	3083364	83	Deletion
Chr1	3083662	6	Insertion
Chr1	3083663	1	Insertion
Chr1	3083771	1	Insertion
Chr1	3084189	2	Insertion
Chr1	3084321	1	Deletion
Chr1	3084371	1	Deletion
Chr1	3084374	1	Deletion
Chr1	3084548	1	Insertion
Chr1	3084595	8	Insertion
Chr1	3084967	1	Deletion
Chr1	3085070	2	Deletion
Chr1	3085089	1	Insertion
Chr1	3085249	6	Insertion
Chr1	3085758	9	Insertion
Chr1	3086115	4	Deletion
Chr1	3086231	1	Deletion
Chr1	3086984	2	Insertion
Chr1	3087081	1	Insertion
Chr1	3087146	3	Insertion
Chr1	3087286	1	Deletion
Chr1	3087850	13	Deletion
Chr1	3092226	12	Insertion
Chr1	3092799	4	Insertion
Chr1	3093089	1	Deletion
Chr1	3094689	1	Deletion
Chr1	3094693	2	Deletion
Chr1	3094697	2	Deletion
Chr1	3094941	1	Insertion
Chr1	3095007	2	Deletion
Chr1	3095255	19	Deletion
Chr1	3096293	1	Insertion
Chr1	3096742	1	Deletion
Chr1	3096948	1	Deletion
Chr1	3097694	8	Insertion
Chr1	3097697	4	Insertion
Chr1	3097834	1	Deletion
Chr1	3104552	2	Deletion
Chr1	3105409	5	Deletion
Chr1	3108630	29	Insertion
Chr1	3109224	17	Insertion
Chr1	3111017	2	Insertion
Chr1	3112431	2	Insertion
Chr1	3116816	2	Insertion
Chr1	3117326	1	Deletion
Chr1	3118147	2	Deletion
Chr1	3119851	5	Deletion
Chr1	3119857	1	Deletion
Chr1	3120094	3	Insertion
Chr1	3121268	4	Insertion
Chr1	3121655	1	Deletion
Chr1	3122392	4	Deletion
Chr1	3122986	1	Deletion
Chr1	3127520	2	Deletion
Chr1	3128308	6	Deletion
Chr1	3128611	1	Insertion
Chr1	3128876	1	Insertion
Chr1	3128886	1	Insertion
Chr1	3129034	21	Deletion
Chr1	3129059	3	Deletion
Chr1	3129064	5	Deletion
Chr1	3132575	29	Insertion
Chr1	3132668	2	Deletion
Chr1	3132893	1	Deletion
Chr1	3135613	1	Deletion
Chr1	3135760	1	Deletion
Chr1	3139185	20	Deletion
Chr1	3139689	14	Deletion
Chr1	3141364	13	Insertion
Chr1	3141449	1	Deletion
Chr1	3141951	6	Insertion
Chr1	3141953	1	Insertion
Chr1	3141967	18	Insertion
Chr1	3141969	4	Insertion
Chr1	3141971	11	Insertion
Chr1	3141972	2	Insertion
Chr1	3142143	1	Deletion
Chr1	3142217	11	Insertion
Chr1	3142219	4	Insertion
Chr1	3143738	1	Deletion
Chr1	3143742	1	Insertion
Chr1	3144377	1	Deletion
Chr1	3144380	1	Insertion
Chr1	3144603	1	Deletion
Chr1	3144607	1	Insertion
Chr1	3145537	1	Deletion
Chr1	3145539	2	Deletion
Chr1	3168975	3	Deletion
Chr1	3169052	2	Insertion
Chr1	3169061	1	Insertion
Chr1	3169132	6	Insertion
Chr1	3169134	4	Insertion
Chr1	3169135	4	Insertion
Chr1	3169137	3	Insertion
Chr1	3169482	1	Insertion
Chr1	3169569	2	Deletion
Chr1	3169845	3	Deletion
Chr1	3170171	1	Deletion
Chr1	3170267	1	Deletion
Chr1	3170493	12	Insertion
Chr1	3170495	2	Insertion
Chr1	3170496	5	Insertion
Chr1	3170618	2	Deletion
Chr1	3170626	5	Deletion
Chr1	3170915	8	Deletion
Chr1	3171271	8	Insertion
Chr1	3171806	2	Insertion
Chr1	3171960	1	Insertion
Chr1	3172129	9	Insertion
Chr1	3172165	7	Deletion
Chr1	3172643	1	Deletion
Chr1	3172782	2	Deletion
Chr1	3173005	1	Insertion
Chr1	3178752	1	Insertion
Chr1	3178755	1	Deletion
Chr1	3193110	2	Deletion
Chr1	3194626	19	Insertion
Chr1	3194631	13	Insertion
Chr1	3194633	5	Insertion
Chr1	3194635	4	Insertion
Chr1	3195513	1	Insertion
Chr1	3195820	1	Deletion
Chr1	3195890	1	Insertion
Chr1	3195925	17	Insertion
Chr1	3195981	2	Deletion
Chr1	3196727	2	Deletion
Chr1	3197652	4	Deletion
Chr1	3198690	2	Insertion
Chr1	3199605	2	Insertion
Chr1	3202551	2	Deletion
Chr1	3203344	2	Deletion
Chr1	3204400	1	Insertion
Chr1	3204401	1	Insertion
Chr1	3204462	3	Deletion
Chr1	3204497	1	Deletion
Chr1	3204872	29	Deletion
Chr1	3205179	3	Deletion
Chr1	3205273	1	Deletion
Chr1	3207335	1	Deletion
Chr1	3209898	1	Insertion
Chr1	3211786	1	Insertion
Chr1	3212160	6	Deletion
Chr1	3216552	2	Deletion
Chr1	3219651	10	Insertion
Chr1	3222456	9	Insertion
Chr1	3222733	5	Deletion
Chr1	3222813	1	Deletion
Chr1	3222918	4	Deletion
Chr1	3223771	20	Insertion
Chr1	3224774	53	Deletion
Chr1	3225036	1	Insertion
Chr1	3225162	18	Deletion
Chr1	3230364	4	Deletion
Chr1	3235233	1	Deletion
Chr1	3235874	5	Insertion
Chr1	3235884	1	Deletion
Chr1	3236374	2	Deletion
Chr1	3238549	1	Insertion
Chr1	3238913	4	Insertion
Chr1	3238915	8	Insertion
Chr1	3238918	4	Insertion
Chr1	3238921	4	Insertion
Chr1	3239207	1	Deletion
Chr1	3239262	1	Insertion
Chr1	3239465	1	Deletion
Chr1	3239488	8	Insertion
Chr1	3240177	1	Deletion
Chr1	3240261	6	Insertion
Chr1	3242771	2	Deletion
Chr1	3242906	23	Insertion
Chr1	3243135	1	Insertion
Chr1	3243155	1	Deletion
Chr1	3243614	12	Deletion
Chr1	3246841	1	Deletion
Chr1	3246895	1	Deletion
Chr1	3247042	2	Deletion
Chr1	3247755	1	Deletion
Chr1	3247792	1	Deletion
Chr1	3247821	7	Deletion
Chr1	3247914	4	Deletion
Chr1	3248006	1	Insertion
Chr1	3248036	4	Deletion
Chr1	3248193	18	Insertion
Chr1	3248298	3	Deletion
Chr1	3248357	1	Insertion
Chr1	3248500	2	Insertion
Chr1	3248645	3	Insertion
Chr1	3248684	4	Insertion
Chr1	3248688	1	Insertion
Chr1	3248689	1	Insertion
Chr1	3248730	1	Deletion
Chr1	3248781	1	Insertion
Chr1	3248869	1	Insertion
Chr1	3248882	2	Deletion
Chr1	3248887	5	Deletion
Chr1	3248956	1	Deletion
Chr1	3249055	1	Deletion
Chr1	3249083	1	Deletion
Chr1	3251687	3	Insertion
Chr1	3251860	2	Insertion
Chr1	3252120	3	Deletion
Chr1	3252566	1	Deletion
Chr1	3253757	8	Insertion
Chr1	3257698	1	Deletion
Chr1	3258874	48	Insertion
Chr1	3259646	1	Insertion
Chr1	3265459	21	Insertion
Chr1	3265954	1	Insertion
Chr1	3266238	3	Deletion
Chr1	3266308	1	Deletion
Chr1	3266487	1	Insertion
Chr1	3266495	3	Insertion
Chr1	3266502	5	Insertion
Chr1	3266506	6	Insertion
Chr1	3266507	5	Insertion
Chr1	3266552	1	Insertion
Chr1	3266554	3	Insertion
Chr1	3266556	3	Insertion
Chr1	3266557	1	Insertion
Chr1	3266559	2	Insertion
Chr1	3268060	3	Insertion
Chr1	3269058	5	Insertion
Chr1	3269073	1	Insertion
Chr1	3269087	1	Insertion
Chr1	3269126	1	Insertion
Chr1	3269579	1	Insertion
Chr1	3269660	1	Deletion
Chr1	3269663	1	Insertion
Chr1	3269680	12	Insertion
Chr1	3269879	1	Insertion
Chr1	3270221	5	Deletion
Chr1	3270460	1	Deletion
Chr1	3270571	1	Insertion
Chr1	3270623	1	Deletion
Chr1	3270687	5	Deletion
Chr1	3271130	2	Insertion
Chr1	3271399	1	Insertion
Chr1	3271493	2	Deletion
Chr1	3271515	1	Insertion
Chr1	3271584	1	Insertion
Chr1	3273452	1	Insertion
Chr1	3275095	1	Insertion
Chr1	3275099	1	Deletion
Chr1	3275631	3	Deletion
Chr1	3275685	1	Deletion
Chr1	3275693	1	Insertion
Chr1	3276241	1	Deletion
Chr1	3276395	1	Insertion
Chr1	3276420	1	Insertion
Chr1	3299164	1	Deletion
Chr1	3299239	1	Deletion
Chr1	3299266	2	Insertion
Chr1	3299335	8	Deletion
Chr1	3299434	1	Deletion
Chr1	3299438	1	Deletion
Chr1	3299440	3	Deletion
Chr1	3299446	4	Deletion
Chr1	3300347	1	Insertion
Chr1	3300417	2	Insertion
Chr1	3301797	1	Insertion
Chr1	3301825	1	Deletion
Chr1	3302501	1	Insertion
Chr1	3302504	1	Insertion
Chr1	3302507	1	Insertion
Chr1	3303946	7	Deletion
Chr1	3308826	1	Deletion
Chr1	3308858	1	Insertion
Chr1	3308859	1	Insertion
Chr1	3308860	7	Insertion
Chr1	3308861	2	Insertion
Chr1	3308873	1	Deletion
Chr1	3308948	1	Deletion
Chr1	3309084	2	Deletion
Chr1	3309122	3	Insertion
Chr1	3309123	3	Insertion
Chr1	3309253	4	Insertion
Chr1	3309254	1	Insertion
Chr1	3309255	9	Insertion
Chr1	3309256	1	Insertion
Chr1	3309344	7	Insertion
Chr1	3309399	1	Insertion
Chr1	3309409	6	Deletion
Chr1	3309443	26	Deletion
Chr1	3309480	1	Deletion
Chr1	3309542	2	Insertion
Chr1	3309552	3	Insertion
Chr1	3309664	2	Deletion
Chr1	3309669	3	Deletion
Chr1	3309684	1	Deletion
Chr1	3309687	1	Insertion
Chr1	3309691	1	Insertion
Chr1	3309705	2	Insertion
Chr1	3309709	3	Deletion
Chr1	3309714	1	Deletion
Chr1	3309724	2	Insertion
Chr1	3318063	3	Deletion
Chr1	3318351	2	Insertion
Chr1	3318356	2	Deletion
Chr1	3318431	1	Deletion
Chr1	3318884	2	Deletion
Chr1	3318887	1	Deletion
Chr1	3318980	3	Deletion
Chr1	3320275	1	Insertion
Chr1	3320653	3	Deletion
Chr1	3320676	2	Deletion
Chr1	3321177	4	Deletion
Chr1	3321530	1	Deletion
Chr1	3321925	2	Deletion
Chr1	3322020	2	Insertion
Chr1	3322058	17	Deletion
Chr1	3322078	9	Deletion
Chr1	3322091	12	Deletion
Chr1	3322242	1	Deletion
[truncated: 73,185 more rows]

## Sheet: PAVs
Additional file 4. Comparative genomic analysis between KitaakeX and Nipponbare
Chromosome	Start position	End position	Size (bp)
Chr1	282546	283099	553
Chr1	401358	401526	168
Chr1	734833	736934	2101
Chr1	785399	785745	346
Chr1	1077755	1078367	612
Chr1	1399824	1416991	17167
Chr1	1417686	1418372	686
Chr1	1421226	1426237	5011
Chr1	1429369	1429956	587
Chr1	1430146	1430875	729
Chr1	1431201	1431529	328
Chr1	1433014	1433740	726
Chr1	1434033	1434463	430
Chr1	1434907	1435544	637
Chr1	1435939	1436227	288
Chr1	1487102	1492181	5079
Chr1	1518900	1521891	2991
Chr1	1523178	1546290	23112
Chr1	1554492	1555972	1480
Chr1	1557021	1557404	383
Chr1	1569002	1569497	495
Chr1	1571460	1572015	555
Chr1	1573981	1574940	959
Chr1	1576182	1576376	194
Chr1	1712518	1712612	94
Chr1	1804288	1804718	430
Chr1	2126222	2130108	3886
Chr1	2233846	2234190	344
Chr1	2298453	2298609	156
Chr1	2330718	2343167	12449
Chr1	2364969	2370382	5413
Chr1	2381477	2383060	1583
Chr1	2412862	2413617	755
Chr1	2415583	2415686	103
Chr1	2432102	2441461	9359
Chr1	2465925	2466469	544
Chr1	2468630	2490874	22244
Chr1	2496502	2497411	909
Chr1	2524417	2531159	6742
Chr1	2545892	2565765	19873
Chr1	2571695	2571926	231
Chr1	2577458	2578590	1132
Chr1	2580247	2580632	385
Chr1	2583183	2583430	247
Chr1	2586742	2590430	3688
Chr1	2591012	2591522	510
Chr1	2601261	2601390	129
Chr1	2605534	2606017	483
Chr1	2634934	2638885	3951
Chr1	2641897	2642655	758
Chr1	2648073	2650183	2110
Chr1	2667846	2695071	27225
Chr1	2733913	2734097	184
Chr1	2770063	2772078	2015
Chr1	2773761	2776974	3213
Chr1	2778331	2779318	987
Chr1	2780290	2780879	589
Chr1	2795239	2795385	146
Chr1	2800816	2802258	1442
Chr1	2802985	2803327	342
Chr1	2803802	2805291	1489
Chr1	2810504	2810834	330
Chr1	2813764	2815228	1464
Chr1	2830542	2832350	1808
Chr1	2834358	2838833	4475
Chr1	2839611	2840386	775
Chr1	2844266	2844736	470
Chr1	2846302	2848013	1711
Chr1	2849775	2849997	222
Chr1	2854311	2854656	345
Chr1	2880829	2880942	113
Chr1	2909669	2910722	1053
Chr1	2918121	2930196	12075
Chr1	2930672	2932114	1442
Chr1	2933019	2934650	1631
Chr1	2947614	2947945	331
Chr1	2985688	2993310	7622
Chr1	3017424	3026976	9552
Chr1	3029047	3041053	12006
Chr1	3071266	3071378	112
Chr1	3081111	3081293	182
Chr1	3081736	3082107	371
Chr1	3099557	3103449	3892
Chr1	3133042	3133206	164
Chr1	3145589	3168827	23238
Chr1	3178962	3190288	11326
Chr1	3192093	3192378	285
Chr1	3225824	3227286	1462
Chr1	3239030	3239137	107
Chr1	3241208	3241530	322
Chr1	3244339	3245021	682
Chr1	3247053	3247701	648
Chr1	3249100	3251339	2239
Chr1	3276659	3287576	10917
Chr1	3288087	3288316	229
Chr1	3289983	3298907	8924
Chr1	3299487	3300143	656
Chr1	3308697	3308785	88
Chr1	3309771	3317984	8213
Chr1	3324550	3325666	1116
Chr1	3325847	3325988	141
Chr1	3333737	3341531	7794
Chr1	3353049	3358400	5351
Chr1	3365558	3369858	4300
Chr1	3456603	3456764	161
Chr1	3842730	3843319	589
Chr1	3996696	3996804	108
Chr1	4189563	4189654	91
Chr1	4283055	4283199	144
Chr1	4451918	4452017	99
Chr1	5010550	5011218	668
Chr1	5014063	5027536	13473
Chr1	5054479	5062085	7606
Chr1	5429016	5429151	135
Chr1	5798285	5799217	932
Chr1	5842846	5853455	10609
Chr1	6778458	6778552	94
Chr1	7039944	7040054	110
Chr1	8436347	8436780	433
Chr1	8446876	8446990	114
Chr1	8560938	8561164	226
Chr1	8610511	8610635	124
Chr1	8670400	8670986	586
Chr1	8851801	8852061	260
Chr1	8958228	8958642	414
Chr1	9155055	9156141	1086
Chr1	9506928	9509704	2776
Chr1	10212246	10225231	12985
Chr1	10790602	10790695	93
Chr1	10899417	10900868	1451
Chr1	11056643	11056744	101
Chr1	11114115	11114510	395
Chr1	11352462	11352563	101
Chr1	11490680	11490771	91
Chr1	11540312	11540421	109
Chr1	11559612	11559808	196
Chr1	11569875	11570024	149
Chr1	11647734	11647971	237
Chr1	11661739	11675554	13815
Chr1	11728790	11735163	6373
Chr1	11799171	11799326	155
Chr1	14042191	14042336	145
Chr1	14119088	14119200	112
Chr1	14824620	14830225	5605
Chr1	14903300	14903539	239
Chr1	14903792	14904118	326
Chr1	15123148	15126170	3022
Chr1	16243422	16243608	186
Chr1	16255638	16262380	6742
Chr1	16453576	16454337	761
Chr1	16815233	16820010	4777
Chr1	17026436	17026560	124
Chr1	17076499	17077446	947
Chr1	17088559	17088999	440
Chr1	17099028	17104995	5967
Chr1	17224892	17225616	724
Chr1	17530830	17530998	168
Chr1	17627352	17627607	255
Chr1	17880464	17880572	108
Chr1	18871420	18872472	1052
Chr1	18880218	18880341	123
Chr1	18882812	18885017	2205
Chr1	18897952	18940748	42796
Chr1	19135576	19136475	899
Chr1	19138326	19138446	120
Chr1	19698705	19698891	186
Chr1	20143442	20144087	645
Chr1	20362082	20362176	94
Chr1	20543914	20544003	89
Chr1	20549412	20549534	122
Chr1	20558679	20559119	440
Chr1	21167309	21167410	101
Chr1	21322343	21323043	700
Chr1	21325073	21327625	2552
Chr1	21339707	21371134	31427
Chr1	21372259	21373417	1158
Chr1	21374799	21375720	921
Chr1	21376433	21417593	41160
Chr1	21417882	21418152	270
Chr1	21421748	21424797	3049
Chr1	21426091	21431075	4984
Chr1	21432082	21433562	1480
Chr1	21438875	21472966	34091
Chr1	21500636	21500733	97
Chr1	22597055	22598271	1216
Chr1	22657704	22658133	429
Chr1	22724969	22725068	99
Chr1	22747253	22747396	143
Chr1	23026050	23026191	141
Chr1	23092727	23094769	2042
Chr1	23718639	23718736	97
Chr1	23901865	23902338	473
Chr1	23905551	23919188	13637
Chr1	23920956	23921104	148
Chr1	23926134	23927034	900
Chr1	23930204	23930351	147
Chr1	23937720	23938273	553
Chr1	24010189	24013273	3084
Chr1	24026628	24026807	179
Chr1	24053886	24054047	161
Chr1	24062428	24065411	2983
Chr1	24071189	24072557	1368
Chr1	24072767	24073624	857
Chr1	24073814	24075711	1897
Chr1	24078909	24080596	1687
Chr1	24113365	24118225	4860
Chr1	24119216	24130024	10808
Chr1	24146195	24146785	590
Chr1	24169781	24170522	741
Chr1	24218573	24222584	4011
Chr1	24320158	24320398	240
Chr1	24369956	24372955	2999
Chr1	24391331	24391601	270
Chr1	24476591	24476679	88
Chr1	24638728	24639326	598
Chr1	25048735	25048870	135
Chr1	25234353	25237064	2711
Chr1	25400256	25400441	185
Chr1	25601634	25601739	105
Chr1	25669081	25669332	251
Chr1	26135738	26138782	3044
Chr1	27080811	27080906	95
Chr1	27199016	27199111	95
Chr1	27285597	27285688	91
Chr1	27404477	27404599	122
Chr1	28019691	28024225	4534
Chr1	28565973	28566458	485
Chr1	30551353	30559069	7716
Chr1	31031551	31031708	157
Chr1	31283073	31283195	122
Chr1	31369295	31370221	926
Chr1	31549486	31551116	1630
Chr1	32074638	32074938	300
Chr1	32170287	32170375	88
Chr1	32519503	32519591	88
Chr1	32635954	32640323	4369
Chr1	32721410	32721571	161
Chr1	33217610	33217894	284
Chr1	33620677	33620770	93
Chr1	34076030	34076187	157
Chr1	34132125	34132294	169
Chr1	34182939	34183044	105
Chr1	34685356	34685481	125
Chr1	34821328	34821421	93
Chr1	35299316	35300437	1121
Chr1	35423212	35423350	138
Chr1	35773978	35774206	228
Chr1	35822443	35828995	6552
Chr1	36163746	36175066	11320
Chr1	36188566	36192807	4241
Chr1	36194404	36194996	592
Chr1	36598497	36598608	111
Chr1	37523664	37524103	439
Chr1	37705528	37706255	727
Chr1	38421460	38421764	304
Chr1	38647535	38648356	821
Chr1	38912748	38913732	984
Chr1	39127789	39128211	422
Chr1	39869014	39869187	173
Chr1	40148898	40150128	1230
Chr1	40458769	40459855	1086
Chr1	41118638	41119074	436
Chr1	41337864	41343646	5782
Chr1	41361388	41361794	406
Chr1	41516203	41516439	236
Chr1	41556989	41558199	1210
Chr1	41559319	41559575	256
Chr1	41565794	41570683	4889
Chr1	41577992	41578406	414
Chr1	41792763	41792875	112
Chr1	41797187	41797311	124
Chr1	42079575	42080438	863
Chr1	42170801	42176867	6066
Chr1	42343255	42343398	143
Chr1	42670741	42671044	303
Chr1	42753379	42753469	90
Chr1	42819464	42819588	124
Chr1	43184656	43184757	101
Chr1	43519530	43522725	3195
Chr1	43523745	43526745	3000
Chr1	43545877	43545974	97
Chr1	43569649	43573283	3634
Chr1	43581970	43587384	5414
Chr1	43788681	43788780	99
Chr1	43989580	43989757	177
Chr1	44035634	44035856	222
Chr1	44042293	44042714	421
Chr1	44081607	44086976	5369
Chr1	44091786	44092032	246
Chr10	149256	149392	136
Chr10	807640	807769	129
Chr10	887979	888153	174
Chr10	1612453	1612609	156
Chr10	1650877	1651059	182
Chr10	1671910	1672020	110
Chr10	1891323	1891626	303
Chr10	2004536	2004986	450
Chr10	2168344	2168719	375
Chr10	2172230	2172328	98
Chr10	2173809	2174322	513
Chr10	2284550	2285036	486
Chr10	2321107	2322556	1449
Chr10	2336813	2337580	767
Chr10	2360600	2360822	222
Chr10	2372062	2372333	271
Chr10	2385644	2386585	941
Chr10	2391336	2391525	189
Chr10	2399458	2411109	11651
Chr10	2414370	2419716	5346
Chr10	2435020	2446992	11972
Chr10	2487302	2487444	142
Chr10	2531687	2551092	19405
Chr10	2629972	2630122	150
Chr10	2636965	2638476	1511
Chr10	2649001	2649792	791
Chr10	2697757	2698868	1111
Chr10	2700443	2701011	568
Chr10	2708022	2713370	5348
Chr10	2716963	2722402	5439
Chr10	2725259	2726613	1354
Chr10	2727582	2728039	457
Chr10	2731723	2732165	442
Chr10	2736111	2736643	532
Chr10	2772195	2777114	4919
Chr10	3539478	3539597	119
Chr10	3690554	3690706	152
Chr10	3752398	3752502	104
Chr10	4031298	4031668	370
Chr10	4153318	4154067	749
Chr10	4192403	4192555	152
Chr10	4236738	4270454	33716
Chr10	4270939	4290792	19853
Chr10	4534628	4534832	204
Chr10	4717528	4717650	122
Chr10	4779515	4779628	113
Chr10	4865348	4865513	165
Chr10	4937337	4937479	142
Chr10	5687859	5688841	982
Chr10	6350599	6351046	447
Chr10	6747599	6747760	161
Chr10	6898407	6900572	2165
Chr10	7171804	7171980	176
Chr10	7666867	7671540	4673
Chr10	7836247	7836652	405
Chr10	8391401	8391501	100
Chr10	8501674	8501769	95
Chr10	8503793	8504064	271
Chr10	8672560	8673867	1307
Chr10	8674530	8674667	137
Chr10	8686572	8686666	94
Chr10	8900076	8900193	117
Chr10	9805252	9805467	215
Chr10	10005992	10006308	316
Chr10	10203786	10203878	92
Chr10	10236754	10236887	133
Chr10	10429747	10453794	24047
Chr10	10453916	10464871	10955
Chr10	10465786	10465969	183
Chr10	10926181	10926731	550
Chr10	11088474	11088931	457
Chr10	11104444	11107938	3494
Chr10	11331227	11331364	137
Chr10	11360828	11361000	172
Chr10	11530644	11530770	126
Chr10	11832499	11833432	933
Chr10	12008106	12008294	188
Chr10	12124444	12130494	6050
Chr10	12217062	12217232	170
Chr10	12439378	12439926	548
Chr10	12712680	12712787	107
Chr10	12835934	12836054	120
Chr10	12873638	12926610	52972
Chr10	13113096	13122335	9239
Chr10	13385550	13385677	127
Chr10	13475535	13475627	92
Chr10	13673950	13675662	1712
Chr10	13699148	13699264	116
Chr10	13979254	13980825	1571
Chr10	14002987	14003238	251
Chr10	14087710	14087861	151
Chr10	14370101	14370193	92
Chr10	14385247	14389689	4442
Chr10	14414108	14414248	140
Chr10	15019913	15021402	1489
Chr10	15536131	15537025	894
Chr10	15777945	15778524	579
Chr10	15780262	15780400	138
Chr10	16093307	16093469	162
Chr10	16229429	16229908	479
Chr10	16492234	16493164	930
Chr10	16811841	16812739	898
Chr10	17157871	17158625	754
Chr10	17174949	17175045	96
Chr10	17299515	17299620	105
Chr10	17826096	17826252	156
Chr10	17916711	17916817	106
Chr10	17976653	17976974	321
Chr10	18376996	18377087	91
Chr10	18664537	18664661	124
Chr10	18884839	18884969	130
Chr10	18975199	18975327	128
Chr10	19101218	19101616	398
Chr10	19333332	19352352	19020
Chr10	19510304	19513826	3522
Chr10	19639052	19640854	1802
Chr10	19773258	19774671	1413
Chr10	19879086	19883592	4506
Chr10	20066294	20066487	193
Chr10	20067938	20068779	841
Chr10	20259216	20260786	1570
Chr10	20359524	20359617	93
Chr10	20362825	20363801	976
Chr10	20428092	20428351	259
Chr10	20651554	20651665	111
Chr10	21500600	21500739	139
Chr10	21721899	21722087	188
Chr10	22048123	22048738	615
Chr10	22496330	22496490	160
Chr10	22860602	22860762	160
Chr10	22979980	22980399	419
Chr10	23449521	23449738	217
Chr10	23540311	23540936	625
Chr10	23804708	23804823	115
Chr10	23850039	23850166	127
Chr11	225294	225534	240
Chr11	468237	468427	190
Chr11	899945	900546	601
Chr11	1709394	1711990	2596
Chr11	2359835	2359939	104
Chr11	2374844	2374959	115
Chr11	2530935	2531042	107
Chr11	3134963	3136294	1331
Chr11	3141261	3141353	92
Chr11	3417372	3417864	492
Chr11	3610030	3620772	10742
Chr11	3648076	3648198	122
Chr11	4233730	4234812	1082
Chr11	4407539	4407626	87
Chr11	4539031	4539161	130
Chr11	4889473	4889709	236
Chr11	4893773	4898072	4299
Chr11	4900209	4914688	14479
Chr11	4916698	4917719	1021
Chr11	4987439	4987834	395
Chr11	4994927	4998244	3317
Chr11	4999115	4999466	351
Chr11	4999921	5001539	1618
Chr11	5001991	5002867	876
Chr11	5004463	5007761	3298
Chr11	5017167	5017324	157
Chr11	5020107	5021927	1820
Chr11	5022074	5022397	323
Chr11	5023630	5023738	108
Chr11	5026005	5027245	1240
Chr11	5028709	5029520	811
Chr11	5029981	5045883	15902
Chr11	5050650	5050928	278
Chr11	5051347	5051480	133
Chr11	5070517	5072828	2311
Chr11	5077517	5079019	1502
Chr11	5080581	5080914	333
Chr11	5081582	5082204	622
Chr11	5082731	5083718	987
Chr11	5083960	5110642	26682
Chr11	5113197	5114131	934
Chr11	5115988	5116220	232
Chr11	5119468	5119697	229
Chr11	5122626	5136461	13835
Chr11	5138757	5140329	1572
Chr11	5142965	5146670	3705
Chr11	5148963	5150314	1351
Chr11	5150810	5151503	693
Chr11	5153185	5154337	1152
Chr11	5158318	5160452	2134
Chr11	5171092	5171899	807
Chr11	5173659	5173887	228
Chr11	5174987	5175581	594
Chr11	5176696	5184353	7657
Chr11	5186383	5188473	2090
Chr11	5189756	5190924	1168
Chr11	5192416	5192652	236
Chr11	5193347	5193512	165
Chr11	5194261	5194634	373
Chr11	5196135	5197549	1414
Chr11	5201155	5203727	2572
Chr11	5205686	5206537	851
Chr11	5208663	5209827	1164
Chr11	5211042	5212812	1770
Chr11	5213117	5213303	186
Chr11	5213914	5214241	327
Chr11	5245758	5246117	359
Chr11	5264365	5264605	240
Chr11	5278398	5287594	9196
Chr11	5306623	5316790	10167
Chr11	5319145	5326284	7139
Chr11	5329601	5334799	5198
Chr11	5335249	5346034	10785
Chr11	5369293	5391018	21725
Chr11	5398842	5400443	1601
Chr11	5403079	5415647	12568
Chr11	5451416	5452278	862
Chr11	5453048	5453290	242
Chr11	5454029	5454178	149
Chr11	5574703	5574882	179
Chr11	5885224	5885853	629
Chr11	5900595	5900703	108
Chr11	6272399	6272801	402
Chr11	6317267	6323013	5746
Chr11	6353914	6354050	136
Chr11	6439201	6442937	3736
Chr11	6450004	6450127	123
Chr11	6459584	6460060	476
Chr11	6484193	6484309	116
Chr11	6530300	6530578	278
Chr11	6641281	6641845	564
Chr11	6642769	6645643	2874
Chr11	6646944	6647279	335
Chr11	6650888	6656874	5986
Chr11	6657510	6662847	5337
Chr11	6663635	6664004	369
Chr11	6664264	6666191	1927
Chr11	6668248	6668926	678
Chr11	6672694	6673254	560
Chr11	6674025	6677872	3847
Chr11	6680742	6681381	639
Chr11	6685159	6715737	30578
Chr11	6718594	6741478	22884
Chr11	6742774	6757916	15142
Chr11	6759410	6830722	71312
Chr11	6885641	6918308	32667
Chr11	6918443	6941793	23350
Chr11	6942326	7010727	68401
Chr11	7011886	7121867	109981
Chr11	7122803	7123492	689
Chr11	7127483	7128359	876
Chr11	7129270	7130530	1260
Chr11	7157514	7170497	12983
Chr11	7186187	7186659	472
Chr11	7189466	7189805	339
Chr11	7208131	7210493	2362
Chr11	7210807	7210996	189
Chr11	7212483	7214357	1874
Chr11	7216347	7220238	3891
Chr11	7223161	7223795	634
Chr11	7225468	7225941	473
Chr11	7226686	7239097	12411
Chr11	7242167	7242503	336
Chr11	7245661	7245754	93
Chr11	7247514	7257001	9487
Chr11	7261201	7275666	14465
Chr11	7278482	7279653	1171
Chr11	7280842	7281774	932
Chr11	7282534	7285511	2977
Chr11	7293243	7293551	308
Chr11	7293823	7295637	1814
Chr11	7303763	7304539	776
Chr11	7305019	7306082	1063
Chr11	7306533	7306837	304
Chr11	7309013	7311025	2012
Chr11	7320621	7320829	208
Chr11	7371433	7382392	10959
Chr11	7389725	7395491	5766
Chr11	7406011	7406290	279
Chr11	7407429	7408410	981
Chr11	7409451	7409781	330
Chr11	7410784	7410925	141
Chr11	7411967	7412197	230
Chr11	7430513	7430737	224
Chr11	7441960	7442101	141
Chr11	7448329	7448904	575
Chr11	7449106	7457779	8673
Chr11	7464114	7464373	259
Chr11	7464681	7464854	173
Chr11	7489195	7495250	6055
Chr11	7547668	7550130	2462
Chr11	7550344	7558063	7719
Chr11	7578942	7579413	471
Chr11	7618474	7618605	131
Chr11	7754048	7754875	827
Chr11	7806740	7807316	576
Chr11	7807838	7810753	2915
Chr11	8198720	8198812	92
Chr11	8972031	8972934	903
Chr11	9202453	9240786	38333
Chr11	9932176	9935632	3456
Chr11	10116536	10116680	144
Chr11	10371925	10372018	93
Chr11	10776766	10777054	288
Chr11	11157123	11157238	115
Chr11	11166050	11166176	126
Chr11	11246847	11247795	948
Chr11	11356036	11356467	431
Chr11	11984441	11985114	673
Chr11	12227475	12228136	661
Chr11	12519953	12520913	960
Chr11	12522411	12522523	112
Chr11	12543565	12544627	1062
Chr11	12638175	12638394	219
Chr11	12700418	12700602	184
Chr11	13479894	13486447	6553
Chr11	13491724	13499624	7900
Chr11	13500822	13502183	1361
Chr11	13545546	13554341	8795
Chr11	13558683	13563543	4860
Chr11	13627091	13627221	130
Chr11	14173367	14173467	100
Chr11	14566138	14566602	464
Chr11	15664613	15664872	259
Chr11	15969759	15970281	522
Chr11	15971400	15972208	808
Chr11	15981106	15982967	1861
Chr11	16038067	16038181	114
Chr11	16159408	16159566	158
Chr11	16406458	16406584	126
Chr11	16562442	16562672	230
Chr11	16645769	16648037	2268
Chr11	17175116	17176566	1450
Chr11	17177707	17177889	182
Chr11	17268822	17268942	120
Chr11	17278490	17278630	140
Chr11	17335534	17335766	232
Chr11	17652536	17652829	293
Chr11	17997427	17997676	249
Chr11	18041313	18041636	323
Chr11	18057225	18058150	925
Chr11	18086324	18088184	1860
Chr11	18113256	18113349	93
Chr11	18248330	18248681	351
Chr11	18551219	18568318	17099
Chr11	18580241	18580514	273
Chr11	18603477	18604196	719
Chr11	18698105	18698320	215
Chr11	19077301	19078977	1676
Chr11	19154266	19154408	142
Chr11	19206787	19206922	135
Chr11	19218105	19218858	753
Chr11	19399203	19400715	1512
Chr11	19477706	19477890	184
Chr11	19780926	19781309	383
Chr11	19795291	19795401	110
Chr11	19821917	19822154	237
Chr11	19837567	19838071	504
Chr11	19845164	19845254	90
Chr11	19871063	19872151	1088
Chr11	19881519	19883613	2094
Chr11	19884196	19885565	1369
Chr11	19887548	19890753	3205
Chr11	19893106	19893673	567
Chr11	19895662	19896259	597
Chr11	19897237	19938935	41698
Chr11	19940208	19940783	575
Chr11	19950426	19988302	37876
Chr11	19990601	19990698	97
Chr11	19991408	20005476	14068
Chr11	20007204	20017175	9971
Chr11	20018295	20019782	1487
Chr11	20020200	20020916	716
Chr11	20025148	20052223	27075
Chr11	20053649	20145616	91967
Chr11	20153330	20154119	789
Chr11	20157756	20159766	2010
Chr11	20160404	20163221	2817
Chr11	20571019	20571492	473
Chr11	20605474	20605720	246
Chr11	20611736	20612182	446
Chr11	20916265	20916401	136
Chr11	21506701	21506831	130
Chr11	22507408	22507508	100
Chr11	22558383	22558539	156
Chr11	22566134	22567951	1817
Chr11	22577786	22578002	216
Chr11	22588639	22589998	1359
Chr11	22603163	22618375	15212
Chr11	22621857	22622078	221
Chr11	22626974	22627112	138
Chr11	22636115	22636586	471
Chr11	22636840	22636954	114
Chr11	22650506	22667977	17471
Chr11	22701544	22705713	4169
Chr11	22776276	22776430	154
Chr11	22911947	22912404	457
Chr11	22927256	22927478	222
Chr11	22933023	22933548	525
Chr11	22961111	22961321	210
Chr11	22972721	22972811	90
Chr11	22978023	22978891	868
Chr11	22980523	22980623	100
Chr11	22987933	23045057	57124
Chr11	23047857	23068449	20592
Chr11	23076664	23077725	1061
Chr11	23079699	23081665	1966
Chr11	23099800	23100348	548
Chr11	23159679	23161094	1415
Chr11	23161824	23162381	557
Chr11	23163878	23165420	1542
Chr11	23166863	23167596	733
Chr11	23170723	23170914	191
Chr11	23171362	23175144	3782
Chr11	23175879	23183824	7945
Chr11	23185395	23185643	248
Chr11	23223034	23223852	818
Chr11	23227143	23227337	194
Chr11	23265863	23271777	5914
Chr11	23275515	23282175	6660
Chr11	23286638	23286893	255
Chr11	23293093	23293374	281
Chr11	23293832	23294130	298
Chr11	23297732	23298010	278
Chr11	23298867	23301358	2491
Chr11	23305800	23305990	190
Chr11	23306653	23308099	1446
Chr11	23308342	23308598	256
Chr11	23319675	23319799	124
Chr11	23330395	23331429	1034
Chr11	23422405	23422719	314
Chr11	23436872	23440675	3803
Chr11	23442028	23443245	1217
Chr11	23444386	23444968	582
Chr11	23466755	23467297	542
Chr11	23470220	23470919	699
Chr11	23489836	23490393	557
Chr11	23505268	23505388	120
Chr11	23518666	23518813	147
Chr11	23521221	23522699	1478
Chr11	23539677	23540199	522
Chr11	23546678	23547127	449
Chr11	23548269	23549208	939
Chr11	23568924	23573385	4461
Chr11	23823910	23824142	232
Chr11	23838621	23838711	90
Chr11	24033373	24034634	1261
Chr11	24441087	24441207	120
Chr11	24697376	24697509	133
Chr11	24889272	24889373	101
Chr11	24986023	25023942	37919
Chr11	25045718	25056994	11276
Chr11	25083012	25092293	9281
Chr11	25093453	25101295	7842
Chr11	25102899	25106019	3120
Chr11	25106323	25106564	241
Chr11	25108247	25111615	3368
Chr11	25115069	25132077	17008
Chr11	25133056	25157936	24880
Chr11	25158642	25161656	3014
Chr11	25168461	25171103	2642
Chr11	25180072	25180286	214
Chr11	25180499	25184773	4274
Chr11	25186979	25217133	30154
Chr11	25218149	25224942	6793
Chr11	25225927	25317451	91524
Chr11	25328193	25328869	676
Chr11	25481673	25482152	479
Chr11	25636662	25638209	1547
Chr11	25764275	25764371	96
Chr11	25768795	25780017	11222
Chr11	25791048	25792156	1108
Chr11	26444744	26444855	111
Chr11	26563891	26568850	4959
Chr11	26618514	26619634	1120
Chr11	26648533	26650296	1763
Chr11	26655012	26655250	238
Chr11	26655953	26656043	90
Chr11	26744663	26771759	27096
Chr11	26908142	26908259	117
Chr11	26915242	26916528	1286
Chr11	26925424	26925591	167
Chr11	26926613	26927833	1220
Chr11	26928070	26929191	1121
Chr11	26929921	26930742	821
Chr11	26930987	26981692	50705
Chr11	26982484	26983764	1280
Chr11	26985698	26986455	757
Chr11	26996252	26997433	1181
Chr11	27004340	27004427	87
Chr11	27006194	27007075	881
Chr11	27008000	27008658	658
Chr11	27043662	27056915	13253
Chr11	27089728	27089930	202
Chr11	27101857	27103582	1725
Chr11	27541021	27541434	413
Chr11	27602317	27608185	5868
Chr11	28218845	28219566	721
Chr11	28220116	28221076	960
Chr11	28222040	28223932	1892
Chr11	28235556	28235669	113
Chr11	28241959	28243174	1215
Chr11	28246360	28247100	740
Chr11	28267801	28269056	1255
Chr11	28282802	28307719	24917
Chr11	28308591	28346217	37626
Chr11	28506035	28510184	4149
Chr11	28523493	28525553	2060
Chr11	28624851	28625800	949
Chr11	28630840	28633251	2411
Chr11	28636835	28640799	3964
Chr11	28644266	28662368	18102
Chr11	28677602	28677775	173
Chr11	28684006	28687675	3669
Chr11	28715246	28718373	3127
Chr11	28743904	28748639	4735
Chr11	28748994	28770756	21762
Chr11	28771379	28771755	376
Chr11	28772175	28776913	4738
Chr11	28778178	28778966	788
Chr11	28782705	28789131	6426
Chr11	28816445	28816783	338
Chr11	28843220	28855697	12477
Chr11	28857572	28859591	2019
Chr11	28871018	28871218	200
Chr11	28883690	28885311	1621
Chr11	28885529	28888532	3003
Chr11	28895069	28895302	233
Chr11	28895697	28896563	866
Chr11	28896793	28908048	11255
Chr11	28909141	28917272	8131
Chr11	28917883	28918117	234
Chr11	28922184	28942321	20137
Chr11	28943866	28945409	1543
Chr11	28948302	28948661	359
Chr11	28950121	28951574	1453
Chr11	28954030	28954680	650
Chr11	28956011	28958067	2056
Chr11	28963647	28963894	247
Chr11	28976726	28978247	1521
Chr11	28981282	28985595	4313
Chr11	28985718	28986427	709
Chr11	28986567	28986883	316
Chr11	28987844	28990350	2506
Chr11	28992499	28997740	5241
Chr11	29009692	29011034	1342
Chr11	29016882	29017030	148
Chr11	29024781	29025290	509
Chr11	29031142	29031879	737
Chr11	29034068	29037319	3251
Chr11	29054529	29059511	4982
Chr11	29064969	29065112	143
Chr11	29066969	29073618	6649
Chr11	29077259	29099880	22621
Chr11	29105963	29106946	983
Chr11	29110167	29117456	7289
Chr11	29121094	29124813	3719
Chr11	29129874	29135200	5326
Chr11	29143837	29150563	6726
Chr11	29162927	29163298	371
Chr11	29164598	29165626	1028
Chr11	29166081	29173366	7285
Chr11	29192430	29192536	106
Chr11	29194320	29195546	1226
Chr11	29310896	29314043	3147
Chr11	29330760	29331223	463
Chr11	29334034	29338751	4717
Chr11	29343579	29352363	8784
Chr11	29352728	29355789	3061
Chr11	29402920	29406531	3611
Chr11	29417177	29421442	4265
Chr11	29423697	29425584	1887
Chr11	29430489	29431346	857
Chr11	29432881	29433406	525
Chr11	29438231	29439229	998
Chr11	29442558	29444142	1584
Chr11	29444681	29445840	1159
Chr11	29448524	29448910	386
Chr11	29550546	29550648	102
Chr11	29601773	29601983	210
Chr12	375967	376099	132
Chr12	448696	448786	90
Chr12	574730	574894	164
Chr12	1189871	1190134	263
Chr12	1317945	1318046	101
Chr12	1687258	1687346	88
Chr12	1932628	1933734	1106
Chr12	1958287	1958487	200
Chr12	2483122	2489468	6346
Chr12	2642861	2643091	230
Chr12	2986911	2987497	586
Chr12	3651766	3651858	92
Chr12	3789059	3789153	94
Chr12	3878161	3878990	829
Chr12	4558485	4558577	92
Chr12	5183010	5183108	98
Chr12	5564953	5565885	932
Chr12	5748282	5748398	116
Chr12	5836933	5839171	2238
Chr12	5873872	5876882	3010
Chr12	5877602	5878884	1282
Chr12	5880255	5912500	32245
Chr12	6091195	6094422	3227
Chr12	6094868	6095812	944
Chr12	6097097	6099284	2187
Chr12	6099666	6101782	2116
Chr12	6102385	6103062	677
Chr12	6107948	6109475	1527
Chr12	6110060	6110428	368
Chr12	6114411	6114985	574
Chr12	6115473	6118662	3189
Chr12	6121422	6124894	3472
Chr12	6125573	6125729	156
Chr12	6126701	6128177	1476
Chr12	6128497	6128827	330
Chr12	6129783	6132854	3071
Chr12	6139596	6139996	400
Chr12	6140274	6143240	2966
Chr12	6145572	6179011	33439
Chr12	6184877	6185884	1007
Chr12	6194695	6195643	948
Chr12	6206000	6206188	188
Chr12	6219363	6225043	5680
Chr12	6232387	6232948	561
Chr12	6257822	6259605	1783
Chr12	6336343	6337129	786
Chr12	6371857	6376601	4744
Chr12	6453424	6454005	581
Chr12	6460670	6463803	3133
Chr12	6569370	6570195	825
Chr12	6570565	6570807	242
Chr12	6571472	6571656	184
Chr12	6571955	6572991	1036
Chr12	6574133	6574320	187
Chr12	6575755	6576166	411
Chr12	6577279	6598968	21689
Chr12	6600525	6602651	2126
Chr12	6604285	6604738	453
Chr12	6605130	6605305	175
Chr12	6607178	6612668	5490
Chr12	6614346	6615013	667
Chr12	6620077	6623017	2940
Chr12	6645155	6647480	2325
Chr12	6649654	6649989	335
Chr12	6651112	6651420	308
Chr12	6652061	6652183	122
Chr12	6652388	6653855	1467
Chr12	6659008	6659173	165
Chr12	6664114	6664682	568
Chr12	6666523	6681926	15403
Chr12	6682660	6683332	672
Chr12	6691674	6692208	534
Chr12	6841099	6841353	254
Chr12	7576470	7576653	183
Chr12	7584057	7584193	136
Chr12	7768619	7781123	12504
Chr12	8431874	8440885	9011
Chr12	8811915	8812021	106
Chr12	8819711	8819841	130
Chr12	9173991	9174124	133
Chr12	9421198	9421668	470
Chr12	9471838	9471957	119
Chr12	9661875	9662115	240
Chr12	11455995	11456276	281
Chr12	11494380	11495978	1598
Chr12	11590788	11593322	2534
Chr12	11621968	11622292	324
Chr12	11626486	11627858	1372
Chr12	11631267	11631386	119
Chr12	11644248	11644552	304
Chr12	11653561	11662210	8649
Chr12	11673052	11673372	320
Chr12	11963431	11967247	3816
Chr12	12420774	12420891	117
Chr12	12611176	12611321	145
Chr12	12815531	12815655	124
Chr12	13180447	13180962	515
Chr12	13190104	13190280	176
Chr12	13506604	13506709	105
Chr12	13733343	13733532	189
Chr12	14309160	14309325	165
Chr12	14817641	14817792	151
Chr12	14823772	14823872	100
Chr12	15266173	15266265	92
Chr12	15478538	15478720	182
Chr12	15691716	15691927	211
Chr12	16728835	16728938	103
Chr12	17054876	17054964	88
Chr12	17434351	17434444	93
Chr12	17623049	17623924	875
Chr12	17919501	17919631	130
Chr12	17960226	17961825	1599
Chr12	17972748	17973038	290
Chr12	18038418	18045490	7072
Chr12	18057885	18058289	404
Chr12	18098000	18113916	15916
Chr12	18114341	18115693	1352
Chr12	18116153	18131867	15714
Chr12	18133171	18135884	2713
Chr12	18138427	18139669	1242
Chr12	18140053	18140220	167
Chr12	18140887	18143241	2354
Chr12	18144723	18147041	2318
Chr12	18151969	18155310	3341
Chr12	18155637	18158329	2692
Chr12	18159631	18159864	233
Chr12	18162762	18163936	1174
Chr12	18164224	18192165	27941
Chr12	18192278	18199827	7549
Chr12	18200781	18201607	826
Chr12	18202403	18202808	405
Chr12	18203539	18221445	17906
Chr12	18222539	18223618	1079
Chr12	18226941	18228310	1369
Chr12	18229290	18230262	972
Chr12	18232183	18233410	1227
Chr12	18237074	18237223	149
Chr12	18240285	18240496	211
Chr12	18240765	18242747	1982
Chr12	18243948	18245795	1847
Chr12	18247256	18248454	1198
Chr12	18253534	18253894	360
Chr12	18255259	18257954	2695
Chr12	18315695	18317807	2112
Chr12	18321394	18336762	15368
Chr12	18338110	18347848	9738
Chr12	18354436	18358815	4379
Chr12	18360044	18364204	4160
Chr12	18366315	18366471	156
Chr12	18366985	18369763	2778
Chr12	18373214	18373697	483
Chr12	18375087	18375340	253
Chr12	18380019	18383352	3333
Chr12	18482453	18482878	425
Chr12	18505742	18507069	1327
Chr12	18593194	18611556	18362
Chr12	18631629	18631851	222
Chr12	18632490	18638466	5976
Chr12	18639127	18640307	1180
Chr12	18641959	18642166	207
Chr12	18643385	18643548	163
Chr12	18646482	18647770	1288
Chr12	18648376	18648721	345
Chr12	18649392	18650416	1024
Chr12	18650679	18652892	2213
Chr12	18653317	18654370	1053
Chr12	18657582	18659045	1463
Chr12	19012961	19013207	246
Chr12	19394465	19394745	280
Chr12	19526431	19526530	99
Chr12	19596529	19596653	124
Chr12	19885326	19886415	1089
Chr12	20262841	20264860	2019
Chr12	20621833	20622299	466
Chr12	21193639	21193751	112
Chr12	21253322	21253410	88
Chr12	22155896	22156057	161
Chr12	22221445	22222313	868
Chr12	22240176	22240342	166
Chr12	22346228	22346353	125
Chr12	22546308	22546409	101
Chr12	22690285	22690381	96
Chr12	23020263	23020352	89
Chr12	23084348	23087240	2892
Chr12	23088870	23102808	13938
Chr12	23181382	23181617	235
Chr12	23304102	23304234	132
Chr12	23608163	23608256	93
Chr12	24227412	24227609	197
Chr12	24744574	24744662	88
Chr12	24878619	24882616	3997
Chr12	25150337	25152942	2605
Chr12	25233232	25257736	24504
Chr12	25442492	25443112	620
Chr12	25812532	25812778	246
Chr12	25846603	25846742	139
Chr12	26059187	26059317	130
Chr12	26125839	26126182	343
Chr12	26499110	26500916	1806
Chr12	26502057	26508017	5960
Chr12	26508393	26509241	848
Chr12	26559645	26559940	295
Chr12	26560337	26561052	715
Chr12	26563726	26575488	11762
Chr12	26575980	26576656	676
Chr12	26581879	26582328	449
Chr12	26584919	26585155	236
Chr12	26587743	26588166	423
Chr12	26588352	26588508	156
Chr12	26590555	26591242	687
Chr12	26591999	26593723	1724
Chr12	26593878	26594427	549
Chr12	26594791	26596785	1994
Chr12	26606732	26607692	960
Chr12	26607956	26608460	504
Chr12	26609686	26609948	262
Chr12	26610317	26610915	598
Chr12	26612408	26614133	1725
Chr12	26615703	26617464	1761
Chr12	26619235	26630068	10833
Chr12	26630834	26631195	361
Chr12	26631834	26634208	2374
Chr12	26639072	26640563	1491
Chr12	26641060	26641405	345
Chr12	26641801	26645035	3234
Chr12	26650354	26650489	135
Chr12	26653507	26654038	531
Chr12	26654652	26654836	184
Chr12	26661077	26663496	2419
Chr12	26664626	26665614	988
Chr12	26665768	26666700	932
Chr12	26668942	26669276	334
Chr12	26669878	26670387	509
Chr12	26670885	26680012	9127
Chr12	26681595	26691389	9794
Chr12	26692684	26692926	242
Chr12	26695213	26695710	497
Chr12	26696794	26696893	99
Chr12	26705984	26707792	1808
Chr12	26707989	26710249	2260
Chr12	26711208	26711877	669
Chr12	26712682	26713027	345
Chr12	26713646	26713878	232
Chr12	26719130	26737967	18837
Chr2	282278	282407	129
Chr2	1730607	1730774	167
Chr2	2402901	2403027	126
Chr2	2453746	2455719	1973
Chr2	3305602	3306670	1068
Chr2	3309278	3309829	551
Chr2	3337595	3350498	12903
Chr2	3361996	3362152	156
Chr2	3396497	3396841	344
Chr2	3500818	3500966	148
Chr2	3718606	3718748	142
Chr2	3724559	3725128	569
Chr2	4129662	4129791	129
Chr2	5171961	5172294	333
Chr2	5457615	5457703	88
Chr2	5662229	5662374	145
Chr2	6040450	6040709	259
Chr2	6052328	6065090	12762
Chr2	6862380	6862498	118
Chr2	6946644	6947271	627
Chr2	7298415	7298646	231
Chr2	7318944	7319064	120
Chr2	7331937	7332035	98
Chr2	7382981	7383802	821
Chr2	7442821	7442914	93
Chr2	8868212	8868624	412
Chr2	8983505	8983749	244
Chr2	9120107	9123130	3023
Chr2	9174082	9174874	792
Chr2	9383438	9425302	41864
Chr2	9484782	9485571	789
Chr2	9605873	9606099	226
Chr2	9840689	9841869	1180
Chr2	9892968	9893641	673
Chr2	10180104	10180202	98
Chr2	10391895	10392014	119
Chr2	11734362	11734482	120
Chr2	11779688	11779814	126
Chr2	12383883	12385663	1780
Chr2	13142751	13142840	89
Chr2	13651228	13652066	838
Chr2	13722819	13724978	2159
Chr2	13776578	13781012	4434
Chr2	14489271	14489459	188
Chr2	14781299	14782242	943
Chr2	14911183	14911279	96
Chr2	15204472	15204588	116
Chr2	16041664	16041758	94
Chr2	16193683	16193821	138
Chr2	16339421	16339537	116
Chr2	16546961	16560360	13399
Chr2	16582209	16582369	160
Chr2	16718588	16719475	887
Chr2	16759430	16759538	108
Chr2	16771351	16771466	115
Chr2	16780321	16802805	22484
Chr2	16830139	16831631	1492
Chr2	16855239	16859553	4314
Chr2	16871626	16871887	261
Chr2	16887010	16887180	170
Chr2	16897555	16897725	170
Chr2	16911312	16914263	2951
Chr2	16918318	16941646	23328
Chr2	16967709	16968761	1052
Chr2	16986365	16986701	336
Chr2	17005010	17023444	18434
Chr2	17048545	17051269	2724
Chr2	17064944	17065607	663
Chr2	17087902	17105859	17957
Chr2	17167412	17170311	2899
Chr2	17192690	17195838	3148
Chr2	17202504	17212568	10064
Chr2	17242155	17243101	946
Chr2	17279601	17290929	11328
Chr2	17303485	17303757	272
Chr2	17524326	17524508	182
Chr2	17675377	17675512	135
Chr2	17676188	17676417	229
Chr2	18018841	18092421	73580
Chr2	18103051	18111044	7993
Chr2	18113913	18114008	95
Chr2	18124191	18127956	3765
Chr2	18130148	18141908	11760
Chr2	18159339	18162610	3271
Chr2	18163348	18166359	3011
Chr2	18168562	18176728	8166
Chr2	18181807	18184798	2991
Chr2	18214273	18215658	1385
Chr2	18300075	18300192	117
Chr2	18320098	18321420	1322
Chr2	18339621	18351307	11686
Chr2	18356531	18356625	94
Chr2	18377830	18381852	4022
Chr2	18393108	18393939	831
Chr2	18421471	18426892	5421
Chr2	18427119	18430303	3184
Chr2	18430638	18439016	8378
Chr2	18440441	18441347	906
Chr2	18443230	18443482	252
Chr2	18457544	18457770	226
Chr2	18461488	18461755	267
Chr2	18465286	18475890	10604
Chr2	18476494	18479525	3031
Chr2	18483678	18490227	6549
Chr2	18491193	18492653	1460
Chr2	18492824	18494143	1319
Chr2	18496694	18497237	543
Chr2	18498039	18509888	11849
Chr2	18510675	18589314	78639
Chr2	18589776	18604683	14907
Chr2	18606953	18607041	88
Chr2	18607570	18608307	737
Chr2	18612110	18622863	10753
Chr2	18623601	18623796	195
Chr2	18645664	18653450	7786
Chr2	18671096	18671212	116
Chr2	18808988	18812427	3439
Chr2	18826899	18830058	3159
Chr2	19034706	19034824	118
Chr2	19134019	19143932	9913
Chr2	19191509	19191801	292
Chr2	19511950	19512258	308
Chr2	19528762	19542164	13402
Chr2	19549696	19552344	2648
Chr2	19554961	19556098	1137
Chr2	19559423	19559661	238
Chr2	19561677	19564021	2344
Chr2	19566753	19567001	248
Chr2	19567478	19567687	209
Chr2	19568018	19568322	304
Chr2	19569050	19569176	126
Chr2	19570577	19570686	109
Chr2	19570967	19573030	2063
Chr2	19574876	19574998	122
Chr2	19579611	19579875	264
Chr2	19592873	19593109	236
Chr2	19617952	19618068	116
Chr2	19646759	19647161	402
Chr2	19673394	19673595	201
Chr2	19673966	19676588	2622
Chr2	19685802	19697125	11323
Chr2	19712805	19713107	302
Chr2	19717048	19717429	381
Chr2	19724818	19726205	1387
Chr2	19747154	19758934	11780
Chr2	19831906	19832003	97
Chr2	19846220	19847314	1094
Chr2	20101652	20102035	383
Chr2	20115602	20115741	139
Chr2	21509741	21509866	125
Chr2	21612038	21613021	983
Chr2	22204082	22204196	114
Chr2	22353984	22354129	145
Chr2	22400106	22400668	562
Chr2	22443899	22444071	172
Chr2	22664516	22664623	107
Chr2	22969270	22969408	138
Chr2	24632062	24632202	140
Chr2	24664419	24664603	184
Chr2	24710001	24713258	3257
Chr2	24763059	24763503	444
Chr2	24764028	24764193	165
Chr2	24773460	24781276	7816
Chr2	24782420	24785194	2774
Chr2	24786516	24787447	931
Chr2	24788107	24794302	6195
Chr2	24794720	24794852	132
Chr2	24796365	24817410	21045
Chr2	24817597	24836640	19043
Chr2	24836931	24857472	20541
Chr2	24870180	24873333	3153
Chr2	24874091	24875636	1545
Chr2	24878794	24880237	1443
Chr2	24890089	24895127	5038
Chr2	24906781	24962250	55469
Chr2	24974304	24977914	3610
Chr2	24987578	24994303	6725
Chr2	25006669	25008361	1692
Chr2	25059434	25090699	31265
Chr2	25093460	25161614	68154
Chr2	25162737	25164085	1348
Chr2	25164722	25165047	325
Chr2	25171279	25173195	1916
Chr2	25178309	25178596	287
Chr2	25187869	25188234	365
Chr2	25188972	25197104	8132
Chr2	25201605	25202199	594
Chr2	25203176	25203317	141
Chr2	25203838	25205370	1532
Chr2	25208300	25209426	1126
Chr2	25209955	25210823	868
Chr2	25211364	25211957	593
Chr2	25215839	25216437	598
Chr2	25251352	25251577	225
Chr2	25314142	25314562	420
Chr2	25573278	25577551	4273
Chr2	25590451	25590642	191
Chr2	25648174	25648285	111
Chr2	25979143	25979341	198
Chr2	26073398	26090165	16767
Chr2	26091993	26092369	376
Chr2	26466099	26470110	4011
Chr2	26471665	26471806	141
Chr2	27272219	27272822	603
Chr2	27274967	27275202	235
Chr2	27348887	27348975	88
Chr2	27528158	27529547	1389
Chr2	27546288	27547242	954
Chr2	28193088	28193388	300
Chr2	28223496	28223623	127
Chr2	28369865	28369966	101
Chr2	28599362	28599496	134
Chr2	29409966	29410552	586
Chr2	29519580	29519716	136
Chr2	30120358	30120719	361
Chr2	31135543	31138016	2473
Chr2	31189280	31196367	7087
Chr2	31204081	31205045	964
Chr2	31325831	31326457	626
Chr2	33972051	33972222	171
Chr2	34249178	34249309	131
Chr2	35316200	35316330	130
Chr2	36032007	36032129	122
Chr3	536930	537087	157
Chr3	1331853	1332609	756
Chr3	1349203	1349729	526
Chr3	1351417	1351520	103
Chr3	1481340	1481526	186
Chr3	1485586	1485801	215
Chr3	1489940	1490339	399
Chr3	1524334	1524423	89
Chr3	3097619	3097779	160
Chr3	3729496	3729806	310
Chr3	3993093	3993522	429
Chr3	4429680	4429832	152
Chr3	4501430	4501538	108
Chr3	4603233	4603331	98
Chr3	4664301	4664408	107
Chr3	4696618	4696709	91
Chr3	5148322	5148415	93
Chr3	5238911	5238998	87
Chr3	6615499	6615986	487
Chr3	7016591	7016697	106
Chr3	7725489	7725624	135
Chr3	7843472	7843686	214
Chr3	8073560	8073698	138
Chr3	8194326	8194484	158
Chr3	8355346	8355698	352
Chr3	8366790	8370698	3908
Chr3	8419294	8419529	235
Chr3	8429025	8434503	5478
Chr3	8530430	8530568	138
Chr3	8534380	8534623	243
Chr3	8541255	8541636	381
Chr3	8571744	8572121	377
Chr3	8573289	8573654	365
Chr3	8573896	8574152	256
Chr3	8575263	8576663	1400
Chr3	8608678	8612306	3628
Chr3	8626837	8627876	1039
Chr3	9279941	9280052	111
Chr3	9816470	9816901	431
Chr3	10563156	10563291	135
Chr3	10589717	10589909	192
Chr3	11397243	11397352	109
Chr3	11554261	11554362	101
Chr3	11578094	11578341	247
Chr3	11912048	11912136	88
Chr3	11912927	11913031	104
Chr3	12233871	12234027	156
Chr3	12743338	12743483	145
Chr3	12945994	12946086	92
Chr3	13588252	13594183	5931
Chr3	13891526	13904025	12499
Chr3	13923480	13941335	17855
Chr3	14157922	14158324	402
Chr3	14604750	14604860	110
Chr3	15226288	15227690	1402
Chr3	15229502	15234526	5024
Chr3	15283091	15283623	532
Chr3	15285197	15286238	1041
Chr3	15286407	15294997	8590
Chr3	15530350	15530598	248
Chr3	15531763	15531871	108
Chr3	15646375	15646524	149
Chr3	15691389	15691801	412
Chr3	15840094	15840198	104
Chr3	15907817	15908026	209
Chr3	16333647	16333988	341
Chr3	16346709	16346869	160
Chr3	16569339	16574594	5255
Chr3	16594269	16594375	106
Chr3	16597668	16607469	9801
Chr3	16628913	16638320	9407
Chr3	16651124	16658853	7729
Chr3	16660766	16661161	395
Chr3	16663896	16676876	12980
Chr3	16727766	16727927	161
Chr3	16732607	16733511	904
Chr3	16734726	16735494	768
Chr3	16739628	16766643	27015
Chr3	16775489	16901290	125801
Chr3	16902212	16902654	442
Chr3	16902924	16904799	1875
Chr3	16905219	16905420	201
Chr3	16905727	16938728	33001
Chr3	16939274	16943699	4425
Chr3	16944168	16944977	809
Chr3	16946879	16949306	2427
Chr3	16950395	16950675	280
Chr3	16951217	16951963	746
Chr3	17170847	17170982	135
Chr3	17555151	17555278	127
Chr3	17991723	17991823	100
Chr3	18675053	18675145	92
Chr3	19356162	19356589	427
Chr3	19556473	19556688	215
Chr3	19846288	19846378	90
Chr3	20480461	20497338	16877
Chr3	21700026	21700114	88
Chr3	21923634	21923745	111
Chr3	22041182	22041433	251
Chr3	22134940	22135106	166
Chr3	22616020	22616124	104
Chr3	23345568	23345730	162
Chr3	23430723	23430928	205
Chr3	23752680	23752767	87
Chr3	23920633	23921338	705
Chr3	24696187	24696887	700
Chr3	24821473	24821629	156
Chr3	25376372	25376488	116
Chr3	25441190	25441852	662
Chr3	25472758	25472853	95
Chr3	25917389	25917543	154
Chr3	25982303	25982986	683
Chr3	25995730	25995912	182
Chr3	26001736	26002000	264
Chr3	26004412	26016398	11986
Chr3	26022048	26038289	16241
Chr3	26064805	26065284	479
Chr3	26076916	26077216	300
Chr3	26109719	26109883	164
Chr3	26115241	26120943	5702
Chr3	26121430	26132594	11164
Chr3	26139643	26147986	8343
Chr3	26159310	26162459	3149
Chr3	26166295	26180274	13979
Chr3	26180532	26183443	2911
Chr3	26183620	26194733	11113
Chr3	26195814	26232085	36271
Chr3	26237980	26265597	27617
Chr3	26267085	26270836	3751
Chr3	26275056	26289235	14179
Chr3	26291598	26310020	18422
Chr3	26314557	26358322	43765
Chr3	26374092	26374215	123
Chr3	26387466	26387556	90
Chr3	26396580	26396799	219
Chr3	26444379	26444991	612
Chr3	26451378	26451779	401
Chr3	26456842	26457179	337
Chr3	26513680	26548180	34500
Chr3	26548579	26548693	114
Chr3	26553355	26576798	23443
Chr3	26598059	26598318	259
Chr3	26625681	26643505	17824
Chr3	26649054	26659851	10797
Chr3	26663761	26672119	8358
Chr3	26689056	26697699	8643
Chr3	26706595	26708307	1712
Chr3	26712747	26713225	478
Chr3	26715081	26726317	11236
Chr3	26747024	26776338	29314
Chr3	26779384	26782705	3321
Chr3	26785497	26814827	29330
Chr3	26815575	26820259	4684
Chr3	26826284	26826836	552
Chr3	26833576	26837616	4040
Chr3	26843554	26845429	1875
Chr3	26859150	26859999	849
Chr3	26860990	26871505	10515
Chr3	26885369	26888219	2850
Chr3	26908349	26908590	241
Chr3	26931207	26944053	12846
Chr3	26961024	26961362	338
Chr3	26995187	26995446	259
Chr3	27006542	27009681	3139
Chr3	27022496	27022658	162
Chr3	27033791	27036873	3082
Chr3	27138138	27138232	94
Chr3	27440706	27440806	100
Chr3	27500820	27505139	4319
Chr3	27570630	27570723	93
Chr3	27587107	27587198	91
Chr3	27629097	27629331	234
Chr3	27688653	27689693	1040
Chr3	28224007	28224176	169
Chr3	28345151	28345582	431
Chr3	28418214	28418302	88
Chr3	28695924	28696831	907
Chr3	28701734	28701985	251
Chr3	29026219	29026312	93
Chr3	29801319	29801564	245
Chr3	29958744	29961746	3002
Chr3	30019840	30019949	109
Chr3	30174838	30176237	1399
Chr3	31157014	31157744	730
Chr3	32280486	32350103	69617
Chr3	32357391	32364025	6634
Chr3	32366082	32366339	257
Chr3	32374641	32380486	5845
Chr3	33554341	33554451	110
Chr3	33580784	33580874	90
Chr3	33719870	33719992	122
Chr3	33770719	33770811	92
Chr3	34285356	34285479	123
Chr3	34418694	34418862	168
Chr3	34494741	34494844	103
Chr3	34534511	34534653	142
Chr3	35332697	35333241	544
Chr3	35566150	35566260	110
Chr3	36877883	36877979	96
Chr3	37084010	37089093	5083
Chr4	48463	48555	92
Chr4	63543	63682	139
Chr4	275226	278219	2993
Chr4	290447	290992	545
Chr4	297640	310473	12833
Chr4	310819	313977	3158
Chr4	325760	334320	8560
Chr4	355011	355145	134
Chr4	717796	719550	1754
Chr4	792172	799868	7696
Chr4	811317	811560	243
Chr4	857558	868125	10567
Chr4	868248	868356	108
Chr4	869526	869657	131
Chr4	870221	871810	1589
Chr4	874620	877073	2453
Chr4	884135	886376	2241
Chr4	922932	926793	3861
Chr4	934804	938125	3321
Chr4	943627	944276	649
Chr4	1136842	1137459	617
Chr4	1447822	1448222	400
Chr4	1702364	1702579	215
Chr4	2215228	2215659	431
Chr4	2484590	2484875	285
Chr4	2487510	2498816	11306
Chr4	2689621	2733626	44005
Chr4	2739117	2789379	50262
Chr4	2790186	2793880	3694
Chr4	2796735	2847059	50324
Chr4	2848070	2867963	19893
Chr4	3012909	3013065	156
Chr4	3155862	3190687	34825
Chr4	3191581	3239075	47494
Chr4	3587836	3588004	168
Chr4	3602002	3602232	230
Chr4	3602956	3603134	178
Chr4	3650203	3650320	117
Chr4	3706054	3706160	106
Chr4	3769134	3769744	610
Chr4	4036851	4040564	3713
Chr4	4042936	4165948	123012
Chr4	4181761	4182138	377
Chr4	4184833	4188519	3686
Chr4	4195503	4195643	140
Chr4	4206735	4206977	242
Chr4	4211945	4226083	14138
Chr4	4227377	4229002	1625
Chr4	4234773	4234926	153
Chr4	4246663	4246753	90
Chr4	4249520	4254002	4482
Chr4	4258844	4261469	2625
Chr4	4261622	4268166	6544
Chr4	4271864	4278729	6865
Chr4	4280388	4296839	16451
Chr4	4297640	4297806	166
Chr4	4315992	4326751	10759
Chr4	4356001	4370569	14568
Chr4	4372149	4373090	941
Chr4	4377723	4380875	3152
Chr4	4392162	4414478	22316
Chr4	4418505	4436707	18202
Chr4	4442983	4458632	15649
Chr4	4461787	4470892	9105
Chr4	4473266	4473540	274
Chr4	4480689	4483274	2585
Chr4	4483483	4488654	5171
Chr4	4510997	4518279	7282
Chr4	4528921	4541559	12638
Chr4	4594836	4619768	24932
Chr4	4629011	4639573	10562
Chr4	4643283	4650643	7360
Chr4	4655695	4659109	3414
Chr4	4663665	4664780	1115
Chr4	4665639	4711626	45987
Chr4	4713075	4736246	23171
Chr4	4740098	4795364	55266
Chr4	4796841	4797506	665
Chr4	4797876	4799808	1932
Chr4	4801484	4811578	10094
Chr4	4864927	4867393	2466
Chr4	4870964	4875076	4112
Chr4	4905024	4908394	3370
Chr4	4938459	4943678	5219
Chr4	5352561	5352661	100
Chr4	5391655	5391800	145
Chr4	5430167	5430856	689
Chr4	5431464	5431843	379
Chr4	5474464	5474568	104
Chr4	5505578	5505703	125
Chr4	5598479	5599278	799
Chr4	5833138	5834363	1225
Chr4	6023942	6024147	205
Chr4	6100504	6100806	302
Chr4	6481858	6482288	430
Chr4	6603434	6614732	11298
Chr4	6676889	6677041	152
Chr4	7476924	7477299	375
Chr4	7493743	7494922	1179
Chr4	7500087	7500256	169
Chr4	7658687	7659377	690
Chr4	7687411	7688467	1056
Chr4	7694177	7694720	543
Chr4	7702135	7712588	10453
Chr4	7745386	7745490	104
Chr4	7776426	7787877	11451
Chr4	7809311	7810396	1085
Chr4	8182628	8182720	92
Chr4	8272844	8272947	103
Chr4	8345723	8345877	154
Chr4	8606944	8607446	502
Chr4	9147213	9179138	31925
Chr4	9355674	9356519	845
Chr4	10145501	10145738	237
Chr4	10257201	10257380	179
Chr4	10333357	10336620	3263
Chr4	10375077	10375275	198
Chr4	10448594	10449147	553
Chr4	10450984	10451267	283
Chr4	10451976	10452490	514
Chr4	10452652	10453166	514
Chr4	10958618	10959365	747
Chr4	11041030	11046786	5756
Chr4	11167819	11171384	3565
Chr4	11721774	11724535	2761
Chr4	11728792	11732517	3725
Chr4	11740221	11756289	16068
Chr4	12113497	12113756	259
Chr4	12624192	12624375	183
Chr4	12920933	12921171	238
Chr4	13088060	13088153	93
Chr4	13412759	13412925	166
Chr4	14361159	14361338	179
Chr4	14901798	14902027	229
Chr4	15147996	15172154	24158
Chr4	15497807	15498444	637
Chr4	15865382	15865541	159
Chr4	15962793	15973952	11159
Chr4	16005124	16019070	13946
Chr4	16019718	16020801	1083
Chr4	16022560	16028037	5477
Chr4	16033643	16046873	13230
Chr4	16057551	16071845	14294
Chr4	16097901	16104532	6631
Chr4	16335355	16336391	1036
Chr4	16525533	16526067	534
Chr4	16768718	16768900	182
Chr4	17081028	17081189	161
Chr4	17172199	17172615	416
Chr4	17203270	17213761	10491
Chr4	17213912	17222236	8324
Chr4	17263068	17338860	75792
Chr4	17355213	17355400	187
Chr4	17369821	17370269	448
Chr4	17370688	17370799	111
Chr4	17372529	17372740	211
Chr4	17377138	17377402	264
Chr4	17380432	17380668	236
Chr4	17380881	17381910	1029
Chr4	17382490	17382794	304
Chr4	17389939	17390192	253
Chr4	17418343	17418446	103
Chr4	17517104	17517358	254
Chr4	17619399	17619678	279
Chr4	17687337	17687667	330
Chr4	18091297	18091436	139
Chr4	18313228	18314004	776
Chr4	18318844	18329579	10735
Chr4	18342021	18354090	12069
Chr4	18438671	18438789	118
Chr4	18526424	18537402	10978
Chr4	18554025	18558439	4414
Chr4	18561202	18573503	12301
Chr4	18675772	18685584	9812
Chr4	18687668	18688902	1234
Chr4	18695551	18695706	155
Chr4	18696513	18726030	29517
Chr4	18727281	18731770	4489
Chr4	18732443	18732988	545
Chr4	18739854	18740834	980
Chr4	18742586	18744667	2081
Chr4	18749574	18751509	1935
Chr4	18754792	18757569	2777
Chr4	18758062	18765399	7337
Chr4	18768452	18769017	565
Chr4	18777235	18777328	93
Chr4	18778706	18779786	1080
Chr4	18779903	18785826	5923
Chr4	18788479	18792081	3602
Chr4	18804538	18805029	491
Chr4	18806569	18809104	2535
Chr4	18817089	18819023	1934
Chr4	18820246	18824643	4397
Chr4	18825274	18826317	1043
Chr4	18826492	18833558	7066
Chr4	18837942	18838467	525
Chr4	18841372	18842478	1106
Chr4	18843419	18861162	17743
Chr4	18957040	19015008	57968
Chr4	19016135	19017536	1401
Chr4	19047256	19050379	3123
Chr4	19357169	19357327	158
Chr4	19456620	19460409	3789
Chr4	19613004	19613557	553
Chr4	19616733	19618458	1725
Chr4	19731738	19731826	88
Chr4	19760136	19760238	102
Chr4	19919456	19919605	149
Chr4	19980383	19980493	110
Chr4	20027681	20027786	105
Chr4	20443192	20443357	165
Chr4	20664572	20664717	145
Chr4	20827445	20828745	1300
Chr4	21016510	21016610	100
Chr4	21109861	21113760	3899
Chr4	21118135	21125923	7788
Chr4	21146506	21147550	1044
Chr4	21167011	21167453	442
Chr4	21173616	21174564	948
Chr4	21207373	21225650	18277
Chr4	21256159	21259130	2971
Chr4	21263265	21263498	233
Chr4	21274043	21274394	351
Chr4	21298444	21302290	3846
Chr4	21322413	21328167	5754
Chr4	21347184	21348388	1204
Chr4	21613425	21613543	118
Chr4	21692110	21692359	249
Chr4	21737838	21738296	458
Chr4	21922758	21925032	2274
Chr4	22015196	22015346	150
Chr4	22018993	22031733	12740
Chr4	22072450	22072602	152
Chr4	22151708	22151813	105
Chr4	22594547	22595394	847
Chr4	22808968	22809330	362
Chr4	22862063	22862340	277
Chr4	22892656	22892749	93
Chr4	23052048	23052954	906
Chr4	23135606	23145258	9652
Chr4	23211266	23262275	51009
Chr4	23449436	23453734	4298
Chr4	23498975	23499283	308
Chr4	23696900	23697002	102
Chr4	23703250	23703432	182
Chr4	23704201	23704358	157
Chr4	23736260	23736584	324
Chr4	23878674	23879640	966
Chr4	24090507	24090622	115
Chr4	24238904	24239054	150
Chr4	24302957	24303777	820
Chr4	24304206	24311718	7512
Chr4	24391869	24391957	88
Chr4	25172763	25173398	635
Chr4	25179070	25179196	126
Chr4	25180767	25180865	98
Chr4	25273099	25273200	101
Chr4	25419859	25420157	298
Chr4	26517575	26520051	2476
Chr4	26940965	26941055	90
Chr4	27032278	27032930	652
Chr4	27033220	27033339	119
Chr4	27711595	27711706	111
Chr4	27895550	27895645	95
Chr4	27910031	27910191	160
Chr4	28277469	28277898	429
Chr4	28321634	28322243	609
Chr4	28396780	28397211	431
Chr4	30180036	30180291	255
Chr4	30447381	30448812	1431
Chr4	30518567	30518668	101
Chr4	30567246	30567366	120
Chr4	30693426	30693857	431
Chr4	31013895	31014146	251
Chr4	31132923	31133063	140
Chr4	31326036	31326158	122
Chr4	32058954	32060219	1265
Chr4	32437782	32437961	179
Chr4	32634980	32635137	157
Chr4	32725179	32725609	430
Chr4	32739579	32739695	116
Chr4	32785533	32793473	7940
Chr4	32800859	32804996	4137
Chr4	33274548	33275376	828
Chr4	33288979	33289380	401
Chr4	33335448	33335704	256
Chr4	33354336	33358548	4212
Chr4	33359418	33360058	640
Chr4	33365430	33365562	132
Chr4	33368629	33369248	619
Chr4	33374405	33374551	146
Chr4	33374892	33375169	277
Chr4	33379919	33380320	401
Chr4	33381107	33386588	5481
Chr4	33386820	33387253	433
Chr4	33403128	33403370	242
Chr4	33416326	33416504	178
Chr4	33416989	33417251	262
Chr4	33418587	33418850	263
Chr4	33549147	33553225	4078
Chr4	33588500	33594905	6405
Chr4	33723804	33734581	10777
Chr4	33934235	33934347	112
Chr4	34336264	34336368	104
Chr4	34490588	34490933	345
Chr4	34827756	34832071	4315
Chr4	34909087	34909175	88
Chr4	34911043	34911199	156
Chr4	34927186	34927738	552
Chr4	35200044	35200156	112
Chr4	35298829	35299010	181
Chr4	36814205	36814363	158
Chr4	36871605	36916160	44555
Chr5	81440	81580	140
Chr5	126096	126335	239
Chr5	387978	389159	1181
Chr5	481418	481539	121
Chr5	825102	826195	1093
Chr5	964402	964591	189
Chr5	1698239	1698561	322
Chr5	2541773	2541913	140
Chr5	2543975	2544085	110
Chr5	3219347	3221618	2271
Chr5	3306333	3306979	646
Chr5	3377034	3377460	426
Chr5	3535842	3535955	113
Chr5	4067058	4067754	696
Chr5	4763570	4763688	118
Chr5	5387489	5387579	90
Chr5	5469436	5469526	90
Chr5	5514503	5514704	201
Chr5	6155595	6155713	118
Chr5	6261385	6262242	857
Chr5	6461370	6461503	133
Chr5	6476180	6476610	430
Chr5	6783428	6783534	106
Chr5	6953854	6954032	178
Chr5	7691043	7700530	9487
Chr5	7751819	7751940	121
Chr5	7804076	7804163	87
Chr5	7866688	7866853	165
Chr5	8197342	8198145	803
Chr5	8274716	8274835	119
Chr5	8292305	8292464	159
Chr5	8937937	8938081	144
Chr5	9155482	9155809	327
Chr5	9168670	9174733	6063
Chr5	10147736	10147828	92
Chr5	11057430	11057887	457
Chr5	11662915	11663162	247
Chr5	12399634	12404070	4436
Chr5	12539881	12540036	155
Chr5	12545895	12550362	4467
Chr5	12571548	12571687	139
Chr5	12676139	12676903	764
Chr5	12946724	12946872	148
Chr5	13233422	13240275	6853
Chr5	13739216	13741149	1933
Chr5	14188432	14188698	266
Chr5	14624530	14624644	114
Chr5	14704900	14705169	269
Chr5	14783505	14787941	4436
Chr5	14898341	14898648	307
Chr5	15455837	15455993	156
Chr5	15476662	15476750	88
Chr5	15509169	15509306	137
Chr5	16306633	16306933	300
Chr5	16307432	16308035	603
Chr5	16570453	16570941	488
Chr5	16606418	16606506	88
Chr5	16841659	16841787	128
Chr5	17174835	17176974	2139
Chr5	17178174	17178334	160
Chr5	17262384	17262648	264
Chr5	17269942	17270038	96
Chr5	17276930	17283699	6769
Chr5	17287680	17288644	964
Chr5	17302088	17302219	131
Chr5	17313148	17313274	126
Chr5	17366520	17366680	160
Chr5	17395883	17397550	1667
Chr5	17648588	17649205	617
Chr5	17868575	17868662	87
Chr5	18320113	18320242	129
Chr5	18365674	18365891	217
Chr5	19034210	19035491	1281
Chr5	19063253	19063376	123
Chr5	19089482	19091686	2204
Chr5	20566432	20566526	94
Chr5	20762341	20762492	151
Chr5	20893379	20894647	1268
Chr5	21030715	21031626	911
Chr5	21342202	21342404	202
Chr5	21343255	21343386	131
Chr5	21640814	21645494	4680
Chr5	21781432	21781687	255
Chr5	21922574	21923093	519
Chr5	22087246	22087696	450
Chr5	22165171	22166210	1039
Chr5	22658073	22658182	109
Chr5	22730299	22730446	147
Chr5	23268535	23268665	130
Chr5	23310359	23310467	108
Chr5	24511620	24512292	672
Chr5	25022417	25022511	94
Chr5	25053312	25055008	1696
Chr5	25098847	25105089	6242
Chr5	25106189	25111461	5272
Chr5	25627391	25627486	95
Chr5	25763201	25763293	92
Chr5	25812129	25812318	189
Chr5	25940088	25940635	547
Chr5	26943028	26943136	108
Chr5	27138462	27138609	147
Chr5	27395932	27396048	116
Chr5	27639599	27639937	338
Chr5	27641427	27641516	89
Chr5	27717342	27717438	96
Chr5	27764741	27769520	4779
Chr5	28005785	28005899	114
Chr5	28117496	28117662	166
Chr5	28483227	28483363	136
Chr5	28845615	28845734	119
Chr5	28858568	28869126	10558
Chr5	29422452	29422783	331
Chr5	29737695	29737799	104
Chr5	29944157	29944360	203
Chr5	30005810	30018252	12442
Chr5	30159105	30163368	4263
Chr5	30163642	30164019	377
Chr5	30204897	30205483	586
Chr6	183017	183149	132
Chr6	1308262	1308371	109
Chr6	1386578	1386715	137
Chr6	1517746	1517875	129
Chr6	1752972	1753100	128
Chr6	2486737	2486846	109
Chr6	2801562	2803801	2239
Chr6	3206933	3207025	92
Chr6	3279302	3281142	1840
Chr6	3353738	3354174	436
Chr6	3531389	3531880	491
Chr6	4261754	4262226	472
Chr6	4263554	4263889	335
Chr6	4265296	4265446	150
Chr6	4294464	4295137	673
Chr6	4296091	4297134	1043
Chr6	4299950	4312233	12283
Chr6	4319768	4331069	11301
Chr6	4332921	4333926	1005
Chr6	4334288	4334518	230
Chr6	4343982	4349404	5422
Chr6	4350971	4352077	1106
Chr6	4547197	4549338	2141
Chr6	4551398	4564294	12896
Chr6	4568628	4572200	3572
Chr6	4574456	4624757	50301
Chr6	4647220	4668182	20962
Chr6	4673634	4675170	1536
Chr6	4769708	4770026	318
Chr6	4936920	4937037	117
Chr6	5275198	5275361	163
Chr6	5296783	5297147	364
Chr6	5489721	5489846	125
Chr6	6364581	6364679	98
Chr6	6881678	6881788	110
Chr6	7419855	7420260	405
[truncated: 830 more rows]

## Sheet: Inversions
Additional file 4. Comparative genomic analysis between KitaakeX and Nipponbare
Chromosome	Start position	End position	Size (bp)
Chr1	3095592	3096471	879
Chr1	16097228	16099643	2415
Chr10	2581818	2629972	48154
Chr10	3336526	3365510	28984
Chr10	11316004	11316324	320
Chr11	5116419	5118429	2010
Chr11	5188473	5189756	1283
Chr11	7010727	7011886	1159
Chr11	12009440	12009529	89
Chr11	12403438	12424563	21125
Chr11	12429714	12446445	16731
Chr11	12520913	12521591	678
Chr11	12529483	12530366	883
Chr11	16060796	16061286	490
Chr11	25763575	25764275	700
Chr12	3445276	3445712	436
Chr12	5678122	5700057	21935
Chr12	9744047	9756621	12574
Chr2	9174874	9180600	5726
Chr2	18909189	18910083	894
Chr4	15857927	15858738	811
Chr4	15858745	15865382	6637
Chr4	15865541	15866970	1429
Chr4	16104532	16136174	31642
Chr7	11766087	11769596	3509
Chr7	23082912	23085137	2225
Chr8	14551402	14551495	93
Chr8	17594911	17595342	431
Chr8	20767174	20767847	673

## Sheet: SNP-genes
Additional file 4. Comparative genomic analysis between KitaakeX and Nipponbare
Chromosome	Position	Substitution	Effect	Gene ID
Chr1	37287	T>C	Missense	OsKitaake01g000600
Chr1	208953	G>A	Missense	OsKitaake01g002800
Chr1	318599	T>A	Missense	OsKitaake01g004300
Chr1	405310	T>C	Missense	OsKitaake01g005600
Chr1	457809	T>A	Missense	OsKitaake01g006500
Chr1	628763	T>A	Missense	OsKitaake01g113700
Chr1	783475	G>T	Missense	OsKitaake01g008300
Chr1	1107249	T>C	Missense	OsKitaake01g013000
Chr1	1381306	G>C	Missense	OsKitaake01g016600
Chr1	1381334	A>C	Missense	OsKitaake01g016600
Chr1	1391817	G>C	Missense	OsKitaake01g016800
Chr1	1421140	A>T	Missense	OsKitaake01g017300
Chr1	1421150	G>A	Missense	OsKitaake01g017300
Chr1	1421204	T>C	Missense	OsKitaake01g017300
Chr1	1427978	A>C	Missense	OsKitaake01g017600
Chr1	1427989	T>G	Missense	OsKitaake01g017600
Chr1	1428291	C>T	Missense	OsKitaake01g017600
Chr1	1428593	A>G	Missense	OsKitaake01g017600
Chr1	1428689	C>G	Missense	OsKitaake01g017600
Chr1	1428701	A>G	Missense	OsKitaake01g017600
Chr1	1428759	A>T	Missense	OsKitaake01g017600
Chr1	1428760	C>A	Missense	OsKitaake01g017600
Chr1	1428764	C>T	Missense	OsKitaake01g017600
Chr1	1428777	A>T	Missense	OsKitaake01g017600
Chr1	1428823	G>T	Missense	OsKitaake01g017600
Chr1	1428869	C>G	Missense	OsKitaake01g017600
Chr1	1428969	G>T	Missense	OsKitaake01g017600
Chr1	1428971	A>G	Missense	OsKitaake01g017600
Chr1	1432031	G>C	Missense	OsKitaake01g017700
Chr1	1432032	C>T	Missense	OsKitaake01g017700
Chr1	1432059	A>G	Missense	OsKitaake01g017700
Chr1	1432313	G>C	Missense	OsKitaake01g017700
Chr1	1432331	A>G	Missense	OsKitaake01g017700
Chr1	1432353	A>G	Missense	OsKitaake01g017700
Chr1	1432354	T>G	Missense	OsKitaake01g017700
Chr1	1432374	C>A	Missense	OsKitaake01g017700
Chr1	1432487	G>C	Missense	OsKitaake01g017700
Chr1	1432655	G>A	Missense	OsKitaake01g017700
Chr1	1432681	A>T	Missense	OsKitaake01g017700
Chr1	1432688	C>G	Missense	OsKitaake01g017700
Chr1	1432689	C>A	Missense	OsKitaake01g017700
Chr1	1432698	A>G	Missense	OsKitaake01g017700
Chr1	1432760	C>A	Missense	OsKitaake01g017700
Chr1	1432769	A>G	Missense	OsKitaake01g017700
Chr1	1432784	C>A	Missense	OsKitaake01g017700
Chr1	1452761	C>T	Missense	OsKitaake01g018100
Chr1	1471390	C>G	Missense	OsKitaake01g018300
Chr1	1477049	C>T	Missense	OsKitaake01g018400
Chr1	1477268	C>T	Missense	OsKitaake01g018400
Chr1	1546648	C>G	Missense	OsKitaake01g018700
Chr1	1547050	C>T	Missense	OsKitaake01g018700
Chr1	1547051	T>C	Missense	OsKitaake01g018700
Chr1	1547066	C>A	Missense	OsKitaake01g018700
Chr1	1547081	G>T	Missense	OsKitaake01g018700
Chr1	1547092	G>C	Missense	OsKitaake01g018700
Chr1	1547101	A>G	Missense	OsKitaake01g018700
Chr1	1547389	G>A	Missense	OsKitaake01g018700
Chr1	1547392	G>A	Missense	OsKitaake01g018700
Chr1	1547393	T>C	Missense	OsKitaake01g018700
Chr1	1547404	A>T	Missense	OsKitaake01g018700
Chr1	1547413	G>T	Missense	OsKitaake01g018700
Chr1	1547435	G>C	Missense	OsKitaake01g018700
Chr1	1547483	A>T	Missense	OsKitaake01g018700
Chr1	1547484	G>C	Missense	OsKitaake01g018700
Chr1	1547485	T>G	Missense	OsKitaake01g018700
Chr1	1547492	T>C	Missense	OsKitaake01g018700
Chr1	1547848	G>A	Missense	OsKitaake01g018700
Chr1	1547849	T>C	Missense	OsKitaake01g018700
Chr1	1547852	A>T	Missense	OsKitaake01g018700
Chr1	1547855	T>C	Missense	OsKitaake01g018700
Chr1	1547860	T>A	Missense	OsKitaake01g018700
Chr1	1547875	G>A	Missense	OsKitaake01g018700
Chr1	1547885	G>T	Missense	OsKitaake01g018700
Chr1	1548128	G>A	Missense	OsKitaake01g018700
Chr1	1548211	A>G	Missense	OsKitaake01g018700
Chr1	1548212	C>T	Missense	OsKitaake01g018700
Chr1	1548214	T>G	Missense	OsKitaake01g018700
Chr1	1548215	C>G	Missense	OsKitaake01g018700
Chr1	1548218	T>C	Missense	OsKitaake01g018700
Chr1	1548219	T>G	Missense	OsKitaake01g018700
Chr1	1548220	T>G	Missense	OsKitaake01g018700
Chr1	1548716	C>G	Missense	OsKitaake01g018700
Chr1	1548814	G>C	Missense	OsKitaake01g018700
Chr1	1548965	C>T	Missense	OsKitaake01g018700
Chr1	1553153	G>T	Missense	OsKitaake01g018800
Chr1	1553154	T>C	Missense	OsKitaake01g018800
Chr1	1553183	G>T	Missense	OsKitaake01g018800
Chr1	1553184	C>T	Missense	OsKitaake01g018800
Chr1	1553195	G>T	Missense	OsKitaake01g018800
Chr1	1553196	T>C	Missense	OsKitaake01g018800
Chr1	1553204	T>A	Missense	OsKitaake01g018800
Chr1	1553235	C>T	Missense	OsKitaake01g018800
Chr1	1553559	G>T	Missense	OsKitaake01g018800
Chr1	1553562	T>G	Missense	OsKitaake01g018800
Chr1	1553613	C>T	Missense	OsKitaake01g018800
Chr1	1553815	G>C	Missense	OsKitaake01g018800
Chr1	1553969	C>T	Missense	OsKitaake01g018800
Chr1	1553978	G>T	Missense	OsKitaake01g018800
Chr1	1556133	C>A	Missense	OsKitaake01g018800
Chr1	1556224	C>G	Missense	OsKitaake01g018800
Chr1	1556226	C>A	Stop gained	OsKitaake01g018800
Chr1	1556227	G>C	Missense	OsKitaake01g018800
Chr1	1556384	T>C	Missense	OsKitaake01g018800
Chr1	1556385	G>T	Missense	OsKitaake01g018800
Chr1	1563862	T>C	Missense	OsKitaake01g018900
Chr1	1564231	A>G	Missense	OsKitaake01g018900
Chr1	1567166	G>A	Missense	OsKitaake01g019000
Chr1	1570280	G>A	Missense	OsKitaake01g019200
Chr1	1570462	A>G	Missense	OsKitaake01g019200
Chr1	1570561	G>A	Missense	OsKitaake01g019200
Chr1	1570568	A>G	Missense	OsKitaake01g019200
Chr1	1570916	C>A	Missense	OsKitaake01g019200
Chr1	1572291	A>C	Missense	OsKitaake01g019300
Chr1	1572466	T>C	Missense	OsKitaake01g019300
Chr1	1572658	G>A	Missense	OsKitaake01g019300
Chr1	1575165	A>T	Missense	OsKitaake01g019400
Chr1	1575173	C>G	Missense	OsKitaake01g019400
Chr1	1575177	G>A	Missense	OsKitaake01g019400
Chr1	1575180	T>G	Missense	OsKitaake01g019400
Chr1	1575214	A>G	Missense	OsKitaake01g019400
Chr1	1575298	A>G	Missense	OsKitaake01g019400
Chr1	1578061	T>C	Missense	OsKitaake01g019400
Chr1	1627139	T>C	Missense	OsKitaake01g019900
Chr1	2131864	T>G	Missense	OsKitaake01g026800
Chr1	2159901	A>T	Missense	OsKitaake01g027200
Chr1	2203344	A>G	Missense	OsKitaake01g027708
Chr1	2213723	A>C	Missense	OsKitaake01g027800
Chr1	2214633	T>A	Missense	OsKitaake01g027800
Chr1	2255760	C>T	Missense	OsKitaake01g028000
Chr1	2265348	T>C	Missense	OsKitaake01g028100
Chr1	2265362	C>A	Missense	OsKitaake01g028100
Chr1	2265374	A>G	Missense	OsKitaake01g028100
Chr1	2265467	T>C	Missense	OsKitaake01g028100
Chr1	2266734	T>A	Missense	OsKitaake01g028100
Chr1	2285289	C>A	Missense	OsKitaake01g028200
Chr1	2289789	T>C	Missense	OsKitaake01g028200
Chr1	2303382	C>T	Missense	OsKitaake01g028400
Chr1	2304175	G>A	Missense	OsKitaake01g028400
Chr1	2304341	A>G	Missense	OsKitaake01g028400
Chr1	2304394	T>A	Missense	OsKitaake01g028400
Chr1	2304410	T>C	Missense	OsKitaake01g028400
Chr1	2304412	A>G	Missense	OsKitaake01g028400
Chr1	2385303	A>G	Missense	OsKitaake01g029200
Chr1	2385309	G>C	Missense	OsKitaake01g029200
Chr1	2418860	A>G	Missense	OsKitaake01g030000
Chr1	2421537	C>T	Missense	OsKitaake01g030100
Chr1	2429089	C>T	Missense	OsKitaake01g030400
Chr1	2429829	C>G	Missense	OsKitaake01g030400
Chr1	2442073	C>T	Missense	OsKitaake01g030700
Chr1	2451461	T>A	Missense	OsKitaake01g030900
Chr1	2451462	T>G	Missense	OsKitaake01g030900
Chr1	2455362	G>C	Missense	OsKitaake01g031000
Chr1	2456621	T>C	Missense	OsKitaake01g031000
Chr1	2458020	A>C	Missense	OsKitaake01g031100
Chr1	2519012	G>A	Missense	OsKitaake01g032000
Chr1	2566632	A>G	Missense	OsKitaake01g032400
Chr1	2566764	A>G	Missense	OsKitaake01g032400
Chr1	2572472	C>T	Missense	OsKitaake01g032500
Chr1	2574172	G>A	Missense	OsKitaake01g032500
Chr1	2575568	G>T	Missense	OsKitaake01g032600
Chr1	2575617	C>T	Missense	OsKitaake01g032600
Chr1	2575620	A>G	Missense	OsKitaake01g032600
Chr1	2575628	T>C	Missense	OsKitaake01g032600
Chr1	2575718	G>T	Missense	OsKitaake01g032600
Chr1	2575936	C>T	Missense	OsKitaake01g032600
Chr1	2575946	A>C	Missense	OsKitaake01g032600
Chr1	2575956	C>T	Missense	OsKitaake01g032600
Chr1	2576019	G>A	Missense	OsKitaake01g032600
Chr1	2576029	C>T	Missense	OsKitaake01g032600
Chr1	2576184	C>T	Missense	OsKitaake01g032600
Chr1	2576237	G>A	Missense	OsKitaake01g032600
Chr1	2576280	C>T	Missense	OsKitaake01g032600
Chr1	2576311	A>C	Missense	OsKitaake01g032600
Chr1	2576316	C>T	Missense	OsKitaake01g032600
Chr1	2576320	T>G	Missense	OsKitaake01g032600
Chr1	2576328	T>C	Missense	OsKitaake01g032600
Chr1	2576360	G>A	Missense	OsKitaake01g032600
Chr1	2576364	C>A	Missense	OsKitaake01g032600
Chr1	2576373	C>A	Missense	OsKitaake01g032600
Chr1	2576406	G>T	Missense	OsKitaake01g032600
Chr1	2576424	G>C	Missense	OsKitaake01g032600
Chr1	2576431	C>G	Missense	OsKitaake01g032600
Chr1	2576818	G>A	Splice donor	OsKitaake01g032600
Chr1	2576824	T>C	Missense	OsKitaake01g032600
Chr1	2576849	C>A	Stop gained	OsKitaake01g032600
Chr1	2576881	T>G	Missense	OsKitaake01g032600
Chr1	2576958	C>A	Missense	OsKitaake01g032600
Chr1	2576984	C>A	Missense	OsKitaake01g032600
Chr1	2576995	C>T	Missense	OsKitaake01g032600
Chr1	2576998	C>T	Missense	OsKitaake01g032600
Chr1	2578993	T>C	Missense	OsKitaake01g032700
Chr1	2579002	T>A	Stop gained	OsKitaake01g032700
Chr1	2581587	G>C	Missense	OsKitaake01g032800
Chr1	2582761	C>G	Missense	OsKitaake01g032800
Chr1	2582766	T>C	Missense	OsKitaake01g032800
Chr1	2582857	C>A	Missense	OsKitaake01g032800
Chr1	2583018	C>T	Missense	OsKitaake01g032800
Chr1	2583071	G>C	Missense	OsKitaake01g032800
Chr1	2584176	C>T	Stop gained	OsKitaake01g032800
Chr1	2593021	T>C	Missense	OsKitaake01g032900
Chr1	2594131	C>G	Missense	OsKitaake01g032900
Chr1	2594358	A>C	Missense	OsKitaake01g032900
Chr1	2594371	T>G	Missense	OsKitaake01g032900
Chr1	2594380	C>A	Missense	OsKitaake01g032900
Chr1	2594666	T>C	Missense	OsKitaake01g032900
Chr1	2594687	G>A	Missense	OsKitaake01g032900
Chr1	2594717	C>T	Missense	OsKitaake01g032900
Chr1	2594751	T>C	Missense	OsKitaake01g032900
Chr1	2594768	C>A	Missense	OsKitaake01g032900
Chr1	2595189	C>A	Missense	OsKitaake01g032900
Chr1	2597243	C>G	Missense	OsKitaake01g033000
Chr1	2597250	C>A	Missense	OsKitaake01g033000
Chr1	2597442	A>C	Missense	OsKitaake01g033000
Chr1	2598587	C>T	Missense	OsKitaake01g033000
Chr1	2599420	G>A	Missense	OsKitaake01g033000
Chr1	2600959	A>T	Splice donor	OsKitaake01g033100
Chr1	2603170	C>A	Missense	OsKitaake01g033200
Chr1	2621742	T>A	Missense	OsKitaake01g033300
Chr1	2645679	C>T	Missense	OsKitaake01g033400
Chr1	2645727	A>C	Missense	OsKitaake01g033400
Chr1	2645937	G>A	Missense	OsKitaake01g033400
Chr1	2646148	T>A	Missense	OsKitaake01g033400
Chr1	2655876	T>C	Missense	OsKitaake01g033408
Chr1	2655891	C>T	Missense	OsKitaake01g033408
Chr1	2655902	G>A	Missense	OsKitaake01g033408
Chr1	2656091	A>G	Missense	OsKitaake01g033408
Chr1	2656173	A>T	Missense	OsKitaake01g033408
Chr1	2657448	G>A	Missense	OsKitaake01g033600
Chr1	2701646	A>G	Missense	OsKitaake01g033800
Chr1	2702294	A>T	Missense	OsKitaake01g033800
Chr1	2702481	C>A	Missense	OsKitaake01g033800
Chr1	2702579	C>T	Missense	OsKitaake01g033800
Chr1	2702706	A>C	Missense	OsKitaake01g033800
Chr1	2702857	C>A	Missense	OsKitaake01g033800
Chr1	2703184	T>A	Missense	OsKitaake01g033800
Chr1	2719952	T>A	Missense	OsKitaake01g034108
Chr1	2720136	C>T	Missense	OsKitaake01g034108
Chr1	2720390	G>C	Missense	OsKitaake01g034108
Chr1	2720583	A>G	Missense	OsKitaake01g034108
Chr1	2720714	T>C	Missense	OsKitaake01g034108
Chr1	2720757	T>A	Missense	OsKitaake01g034108
Chr1	2720821	T>G	Missense	OsKitaake01g034108
Chr1	2720972	C>T	Missense	OsKitaake01g034108
Chr1	2721038	A>G	Missense	OsKitaake01g034108
Chr1	2721339	C>T	Missense	OsKitaake01g034108
Chr1	2721948	C>A	Missense	OsKitaake01g034116
Chr1	2722038	C>T	Missense	OsKitaake01g034116
Chr1	2722134	G>T	Missense	OsKitaake01g034116
Chr1	2722345	C>T	Missense	OsKitaake01g034116
Chr1	2722372	T>G	Missense	OsKitaake01g034116
Chr1	2722528	C>T	Missense	OsKitaake01g034116
Chr1	2722564	C>T	Missense	OsKitaake01g034116
Chr1	2722815	T>C	Missense	OsKitaake01g034116
Chr1	2722826	G>A	Missense	OsKitaake01g034116
Chr1	2722886	C>T	Missense	OsKitaake01g034116
Chr1	2759634	A>C	Missense	OsKitaake01g034900
Chr1	2759793	T>C	Missense	OsKitaake01g034900
Chr1	2762064	G>T	Missense	OsKitaake01g034900
Chr1	2762308	C>G	Missense	OsKitaake01g034900
Chr1	2762323	A>G	Missense	OsKitaake01g034900
Chr1	2765048	A>G	Missense	OsKitaake01g034908
Chr1	2768127	G>C	Missense	OsKitaake01g034908
Chr1	2768831	T>A	Missense	OsKitaake01g034908
Chr1	2769025	G>A	Missense	OsKitaake01g034908
Chr1	2769434	T>C	Missense	OsKitaake01g034908
Chr1	2779764	T>G	Missense	OsKitaake01g035100
Chr1	2779839	A>G	Missense	OsKitaake01g035100
Chr1	2781023	T>G	Missense	OsKitaake01g035100
Chr1	2786483	T>A	Missense	OsKitaake01g035100
Chr1	2793095	C>T	Missense	OsKitaake01g035200
Chr1	2793212	T>C	Missense	OsKitaake01g035200
Chr1	2793259	A>G	Missense	OsKitaake01g035200
Chr1	2793265	A>G	Missense	OsKitaake01g035200
Chr1	2796084	C>A	Missense	OsKitaake01g035300
Chr1	2796312	G>T	Missense	OsKitaake01g035300
Chr1	2798978	T>C	Missense	OsKitaake01g035300
Chr1	2802510	C>A	Missense	OsKitaake01g035400
Chr1	2802513	A>G	Missense	OsKitaake01g035400
Chr1	2802515	C>A	Missense	OsKitaake01g035400
Chr1	2802555	C>T	Missense	OsKitaake01g035400
Chr1	2802612	G>A	Missense	OsKitaake01g035400
Chr1	2802636	C>T	Missense	OsKitaake01g035400
Chr1	2802747	T>C	Missense	OsKitaake01g035400
Chr1	2802774	T>C	Missense	OsKitaake01g035400
Chr1	2802857	G>A	Missense	OsKitaake01g035400
Chr1	2805898	A>G	Missense	OsKitaake01g035400
Chr1	2806247	C>T	Missense	OsKitaake01g035400
Chr1	2806339	T>A	Missense	OsKitaake01g035400
Chr1	2806598	T>A	Missense	OsKitaake01g035400
Chr1	2806903	G>C	Missense	OsKitaake01g035400
Chr1	2807170	G>A	Missense	OsKitaake01g035400
Chr1	2807176	A>G	Missense	OsKitaake01g035400
Chr1	2807362	A>T	Missense	OsKitaake01g035400
Chr1	2807392	A>G	Missense	OsKitaake01g035400
Chr1	2807526	A>G	Missense	OsKitaake01g035400
Chr1	2809075	G>T	Missense	OsKitaake01g035500
Chr1	2809120	T>A	Missense	OsKitaake01g035500
Chr1	2809122	G>C	Missense	OsKitaake01g035500
Chr1	2809123	C>T	Missense	OsKitaake01g035500
Chr1	2809344	C>G	Missense	OsKitaake01g035500
Chr1	2809357	A>C	Missense	OsKitaake01g035500
Chr1	2812617	C>A	Missense	OsKitaake01g035500
Chr1	2812849	G>A	Missense	OsKitaake01g035500
Chr1	2812966	G>A	Missense	OsKitaake01g035500
Chr1	2813243	T>A	Missense	OsKitaake01g035500
Chr1	2813341	A>C	Missense	OsKitaake01g035500
Chr1	2813351	G>A	Missense	OsKitaake01g035500
Chr1	2813649	T>A	Missense	OsKitaake01g035500
Chr1	2832436	C>A	Missense	OsKitaake01g035900
Chr1	2832494	A>T	Missense	OsKitaake01g035900
Chr1	2832498	C>G	Missense	OsKitaake01g035900
Chr1	2832517	C>T	Missense	OsKitaake01g035900
Chr1	2832538	G>A	Missense	OsKitaake01g035900
Chr1	2832559	C>G	Missense	OsKitaake01g035900
Chr1	2832590	T>C	Missense	OsKitaake01g035900
Chr1	2832688	T>G	Missense	OsKitaake01g035900
Chr1	2832889	A>G	Missense	OsKitaake01g035900
Chr1	2833787	G>A	Missense	OsKitaake01g035900
Chr1	2838860	G>C	Splice acceptor	OsKitaake01g035908
Chr1	2838864	C>A	Missense	OsKitaake01g035908
Chr1	2838873	A>T	Missense	OsKitaake01g035908
Chr1	2838885	C>T	Missense	OsKitaake01g035908
Chr1	2838945	G>C	Missense	OsKitaake01g035908
Chr1	2838947	A>T	Missense	OsKitaake01g035908
Chr1	2838951	C>G	Missense	OsKitaake01g035908
Chr1	2838953	C>G	Missense	OsKitaake01g035908
Chr1	2838960	G>T	Missense	OsKitaake01g035908
Chr1	2838963	T>C	Missense	OsKitaake01g035908
Chr1	2839045	G>C	Missense	OsKitaake01g035908
Chr1	2839056	T>C	Missense	OsKitaake01g035908
Chr1	2839076	G>A	Missense	OsKitaake01g035908
Chr1	2839185	C>A	Missense	OsKitaake01g035908
Chr1	2839195	A>G	Stop lost	OsKitaake01g035908
Chr1	2839199	C>T	Missense	OsKitaake01g035908
Chr1	2840593	G>T	Missense	OsKitaake01g036000
Chr1	2840692	C>T	Missense	OsKitaake01g036000
Chr1	2840764	G>A	Missense	OsKitaake01g036000
Chr1	2840772	A>G	Missense	OsKitaake01g036000
Chr1	2840787	C>G	Missense	OsKitaake01g036000
Chr1	2840863	G>C	Missense	OsKitaake01g036000
Chr1	2841082	G>A	Missense	OsKitaake01g036000
Chr1	2841159	C>G	Missense	OsKitaake01g036000
Chr1	2841160	A>G	Missense	OsKitaake01g036000
Chr1	2841228	A>C	Missense	OsKitaake01g036000
Chr1	2841231	T>C	Missense	OsKitaake01g036000
Chr1	2841234	C>T	Missense	OsKitaake01g036000
Chr1	2841237	A>T	Missense	OsKitaake01g036000
Chr1	2841246	G>A	Missense	OsKitaake01g036000
Chr1	2841307	C>T	Missense	OsKitaake01g036000
Chr1	2841310	A>G	Missense	OsKitaake01g036000
Chr1	2841311	C>G	Missense	OsKitaake01g036000
Chr1	2841336	A>G	Missense	OsKitaake01g036000
Chr1	2841343	A>G	Missense	OsKitaake01g036000
Chr1	2841348	C>G	Missense	OsKitaake01g036000
Chr1	2841382	G>A	Missense	OsKitaake01g036000
Chr1	2841435	A>T	Missense	OsKitaake01g036000
Chr1	2841471	G>A	Missense	OsKitaake01g036000
Chr1	2841472	A>T	Missense	OsKitaake01g036000
Chr1	2841477	A>G	Missense	OsKitaake01g036000
Chr1	2841499	G>A	Missense	OsKitaake01g036000
Chr1	2841501	G>A	Missense	OsKitaake01g036000
Chr1	2841619	C>T	Missense	OsKitaake01g036000
Chr1	2841633	G>A	Missense	OsKitaake01g036000
Chr1	2841670	T>C	Missense	OsKitaake01g036000
Chr1	2841682	C>A	Missense	OsKitaake01g036000
Chr1	2841694	C>A	Missense	OsKitaake01g036000
Chr1	2841852	T>A	Missense	OsKitaake01g036000
Chr1	2841969	G>A	Missense	OsKitaake01g036000
Chr1	2842134	G>A	Missense	OsKitaake01g036000
Chr1	2842252	A>G	Missense	OsKitaake01g036000
Chr1	2842555	C>T	Missense	OsKitaake01g036000
Chr1	2842573	T>G	Missense	OsKitaake01g036000
Chr1	2842672	A>G	Missense	OsKitaake01g036000
Chr1	2842794	A>C	Missense	OsKitaake01g036000
Chr1	2842830	G>A	Missense	OsKitaake01g036000
Chr1	2842851	A>G	Missense	OsKitaake01g036000
Chr1	2842882	A>G	Missense	OsKitaake01g036000
Chr1	2842905	G>C	Missense	OsKitaake01g036000
Chr1	2842919	G>C	Missense	OsKitaake01g036000
Chr1	2843077	T>C	Missense	OsKitaake01g036000
Chr1	2843627	T>A	Missense	OsKitaake01g036000
Chr1	2843723	G>A	Missense	OsKitaake01g036000
Chr1	2843786	A>T	Missense	OsKitaake01g036000
Chr1	2844783	T>G	Missense	OsKitaake01g036100
Chr1	2844804	T>C	Missense	OsKitaake01g036100
Chr1	2844876	T>C	Missense	OsKitaake01g036100
Chr1	2844909	T>C	Missense	OsKitaake01g036100
Chr1	2844985	C>T	Missense	OsKitaake01g036100
Chr1	2845760	G>C	Missense	OsKitaake01g036100
Chr1	2845859	C>A	Missense	OsKitaake01g036100
Chr1	2845934	T>C	Missense	OsKitaake01g036100
Chr1	2845935	C>T	Missense	OsKitaake01g036100
Chr1	2848196	G>T	Missense	OsKitaake01g036200
Chr1	2848385	G>C	Missense	OsKitaake01g036200
Chr1	2848466	A>C	Missense	OsKitaake01g036200
Chr1	2848467	G>T	Missense	OsKitaake01g036200
Chr1	2848706	G>A	Missense	OsKitaake01g036200
Chr1	2848841	C>T	Missense	OsKitaake01g036200
Chr1	2848885	A>G	Missense	OsKitaake01g036200
Chr1	2848904	G>A	Missense	OsKitaake01g036200
Chr1	2849044	G>A	Missense	OsKitaake01g036200
Chr1	2851143	G>A	Missense	OsKitaake01g036300
Chr1	2855048	T>C	Missense	OsKitaake01g036400
Chr1	2855756	G>C	Missense	OsKitaake01g036400
Chr1	2865929	A>C	Missense	OsKitaake01g036700
Chr1	2872596	G>A	Missense	OsKitaake01g036900
Chr1	2872941	T>C	Missense	OsKitaake01g036900
Chr1	2873180	T>C	Missense	OsKitaake01g036900
Chr1	2891474	A>G	Missense	OsKitaake01g037200
Chr1	2891900	C>A	Missense	OsKitaake01g037200
Chr1	2935711	A>G	Missense	OsKitaake01g037608
Chr1	2935735	G>A	Missense	OsKitaake01g037608
Chr1	2935768	T>A	Missense	OsKitaake01g037608
Chr1	2935935	C>A	Missense	OsKitaake01g037608
Chr1	2935936	C>T	Missense	OsKitaake01g037608
Chr1	2936032	A>T	Missense	OsKitaake01g037608
Chr1	2936075	G>A	Missense	OsKitaake01g037608
Chr1	2936141	T>C	Missense	OsKitaake01g037608
Chr1	2936153	C>T	Missense	OsKitaake01g037608
Chr1	2936194	G>A	Missense	OsKitaake01g037608
Chr1	2936696	C>T	Missense	OsKitaake01g037616
Chr1	2936801	G>C	Missense	OsKitaake01g037616
Chr1	2936828	A>C	Missense	OsKitaake01g037616
Chr1	2936843	A>G	Missense	OsKitaake01g037616
Chr1	2937000	T>C	Missense	OsKitaake01g037616
Chr1	2937183	A>G	Missense	OsKitaake01g037616
Chr1	2938096	T>A	Start lost	OsKitaake01g037624
Chr1	2938300	C>T	Missense	OsKitaake01g037624
Chr1	2938344	T>C	Missense	OsKitaake01g037624
Chr1	2938434	T>C	Missense	OsKitaake01g037624
Chr1	2998591	G>T	Missense	OsKitaake01g037800
Chr1	3002068	A>G	Missense	OsKitaake01g037900
Chr1	3009822	C>A	Missense	OsKitaake01g038100
Chr1	3044243	G>T	Missense	OsKitaake01g038200
Chr1	3044244	A>T	Missense	OsKitaake01g038200
Chr1	3044289	T>A	Missense	OsKitaake01g038200
Chr1	3045016	G>A	Missense	OsKitaake01g038200
Chr1	3048059	C>A	Missense	OsKitaake01g038300
Chr1	3053893	A>C	Missense	OsKitaake01g038500
Chr1	3054245	A>G	Missense	OsKitaake01g038500
Chr1	3061255	C>G	Missense	OsKitaake01g038700
Chr1	3073595	C>G	Missense	OsKitaake01g038800
Chr1	3073875	C>A	Missense	OsKitaake01g038800
Chr1	3073891	G>C	Missense	OsKitaake01g038800
Chr1	3073920	T>G	Missense	OsKitaake01g038800
Chr1	3073924	G>C	Missense	OsKitaake01g038800
Chr1	3073929	C>A	Missense	OsKitaake01g038800
Chr1	3073933	C>A	Missense	OsKitaake01g038800
Chr1	3073958	G>A	Missense	OsKitaake01g038800
Chr1	3073967	A>G	Missense	OsKitaake01g038800
Chr1	3073968	A>G	Missense	OsKitaake01g038800
Chr1	3073989	T>C	Missense	OsKitaake01g038800
Chr1	3074000	G>C	Missense	OsKitaake01g038800
Chr1	3074018	G>A	Missense	OsKitaake01g038800
Chr1	3074073	G>A	Missense	OsKitaake01g038800
Chr1	3074078	G>A	Missense	OsKitaake01g038800
Chr1	3074079	T>C	Missense	OsKitaake01g038800
Chr1	3074081	T>G	Missense	OsKitaake01g038800
Chr1	3074082	T>A	Missense	OsKitaake01g038800
Chr1	3074121	A>G	Missense	OsKitaake01g038800
Chr1	3074123	G>A	Missense	OsKitaake01g038800
Chr1	3074439	C>T	Missense	OsKitaake01g038800
Chr1	3084425	G>A	Missense	OsKitaake01g039100
Chr1	3084431	A>T	Missense	OsKitaake01g039100
Chr1	3084440	T>C	Missense	OsKitaake01g039100
Chr1	3084531	T>G	Missense	OsKitaake01g039100
Chr1	3084694	A>G	Missense	OsKitaake01g039100
Chr1	3084730	A>G	Missense	OsKitaake01g039100
Chr1	3084876	T>A	Missense	OsKitaake01g039100
Chr1	3084889	T>G	Missense	OsKitaake01g039100
Chr1	3084928	C>T	Missense	OsKitaake01g039100
Chr1	3085139	G>C	Missense	OsKitaake01g039100
Chr1	3085216	G>T	Missense	OsKitaake01g039100
Chr1	3085236	C>A	Missense	OsKitaake01g039100
Chr1	3091077	C>A	Missense	OsKitaake01g039300
Chr1	3091343	A>C	Missense	OsKitaake01g039300
Chr1	3106211	G>T	Missense	OsKitaake01g039700
Chr1	3107061	A>G	Missense	OsKitaake01g039800
Chr1	3107097	G>A	Missense	OsKitaake01g039800
Chr1	3113609	G>A	Missense	OsKitaake01g040200
Chr1	3113658	C>A	Missense	OsKitaake01g040200
Chr1	3115496	A>T	Missense	OsKitaake01g040300
Chr1	3115857	G>C	Missense	OsKitaake01g040300
Chr1	3116864	G>T	Missense	OsKitaake01g040400
Chr1	3118280	T>C	Missense	OsKitaake01g040400
Chr1	3118285	G>T	Missense	OsKitaake01g040400
Chr1	3124835	A>G	Missense	OsKitaake01g040600
Chr1	3126233	A>C	Missense	OsKitaake01g040600
Chr1	3126633	G>A	Missense	OsKitaake01g040600
Chr1	3126634	C>T	Missense	OsKitaake01g040600
Chr1	3134687	G>T	Missense	OsKitaake01g040900
Chr1	3138952	C>A	Missense	OsKitaake01g041000
Chr1	3143478	C>T	Missense	OsKitaake01g041200
Chr1	3143533	C>T	Missense	OsKitaake01g041200
Chr1	3143551	A>G	Missense	OsKitaake01g041200
Chr1	3143629	T>G	Missense	OsKitaake01g041200
Chr1	3143694	A>G	Missense	OsKitaake01g041200
Chr1	3143699	T>G	Missense	OsKitaake01g041200
Chr1	3143703	G>A	Missense	OsKitaake01g041200
Chr1	3143704	A>T	Missense	OsKitaake01g041200
Chr1	3143730	T>A	Missense	OsKitaake01g041200
Chr1	3143746	G>T	Missense	OsKitaake01g041200
Chr1	3143752	T>G	Missense	OsKitaake01g041200
Chr1	3143755	T>G	Missense	OsKitaake01g041200
Chr1	3143760	A>T	Missense	OsKitaake01g041200
Chr1	3143761	A>G	Missense	OsKitaake01g041200
Chr1	3143762	C>G	Missense	OsKitaake01g041200
Chr1	3143779	C>A	Missense	OsKitaake01g041200
Chr1	3143791	C>T	Missense	OsKitaake01g041200
Chr1	3143803	C>A	Missense	OsKitaake01g041200
Chr1	3143813	C>G	Missense	OsKitaake01g041200
Chr1	3143835	G>A	Missense	OsKitaake01g041200
Chr1	3143847	C>T	Missense	OsKitaake01g041200
Chr1	3143896	T>C	Missense	OsKitaake01g041200
Chr1	3143907	G>C	Missense	OsKitaake01g041200
Chr1	3143909	A>C	Missense	OsKitaake01g041200
Chr1	3143911	A>G	Missense	OsKitaake01g041200
Chr1	3143913	T>G	Missense	OsKitaake01g041200
Chr1	3143914	G>A	Missense	OsKitaake01g041200
Chr1	3143924	T>A	Missense	OsKitaake01g041200
Chr1	3143967	G>T	Missense	OsKitaake01g041200
Chr1	3143968	C>T	Missense	OsKitaake01g041200
Chr1	3143970	T>C	Missense	OsKitaake01g041200
Chr1	3143971	T>G	Missense	OsKitaake01g041200
Chr1	3143980	T>C	Missense	OsKitaake01g041200
Chr1	3144015	T>C	Missense	OsKitaake01g041200
Chr1	3144022	C>T	Missense	OsKitaake01g041200
Chr1	3144025	C>T	Missense	OsKitaake01g041200
Chr1	3144040	A>T	Missense	OsKitaake01g041200
Chr1	3144049	A>C	Missense	OsKitaake01g041200
Chr1	3144070	G>T	Missense	OsKitaake01g041200
Chr1	3144081	C>A	Missense	OsKitaake01g041200
Chr1	3144082	G>A	Missense	OsKitaake01g041200
Chr1	3144096	A>T	Missense	OsKitaake01g041200
Chr1	3144097	T>C	Missense	OsKitaake01g041200
Chr1	3144103	A>C	Missense	OsKitaake01g041200
Chr1	3144117	T>C	Missense	OsKitaake01g041200
Chr1	3144122	G>C	Missense	OsKitaake01g041200
Chr1	3144133	T>C	Missense	OsKitaake01g041200
Chr1	3144146	C>A	Missense	OsKitaake01g041200
Chr1	3144147	T>C	Missense	OsKitaake01g041200
Chr1	3144154	C>T	Missense	OsKitaake01g041200
Chr1	3144182	A>T	Stop gained	OsKitaake01g041200
Chr1	3144184	A>T	Missense	OsKitaake01g041200
Chr1	3144185	T>G	Missense	OsKitaake01g041200
Chr1	3144187	G>C	Missense	OsKitaake01g041200
Chr1	3144190	G>C	Missense	OsKitaake01g041200
Chr1	3144193	T>C	Missense	OsKitaake01g041200
Chr1	3144194	A>C	Missense	OsKitaake01g041200
Chr1	3144197	C>T	Missense	OsKitaake01g041200
Chr1	3144217	T>A	Missense	OsKitaake01g041200
Chr1	3144247	T>G	Missense	OsKitaake01g041200
Chr1	3144261	G>A	Missense	OsKitaake01g041200
Chr1	3144279	T>G	Missense	OsKitaake01g041200
Chr1	3144288	T>C	Missense	OsKitaake01g041200
Chr1	3144309	G>C	Missense	OsKitaake01g041200
Chr1	3144332	T>A	Missense	OsKitaake01g041200
Chr1	3144333	T>C	Missense	OsKitaake01g041200
Chr1	3144340	G>A	Missense	OsKitaake01g041200
Chr1	3144342	G>T	Missense	OsKitaake01g041200
Chr1	3144350	A>C	Missense	OsKitaake01g041200
Chr1	3144379	T>C	Missense	OsKitaake01g041200
Chr1	3144394	T>C	Missense	OsKitaake01g041200
Chr1	3144396	T>G	Missense	OsKitaake01g041200
Chr1	3144408	T>C	Missense	OsKitaake01g041200
Chr1	3144440	A>C	Missense	OsKitaake01g041200
Chr1	3144441	A>T	Missense	OsKitaake01g041200
Chr1	3144442	A>C	Missense	OsKitaake01g041200
Chr1	3144456	C>G	Missense	OsKitaake01g041200
Chr1	3144458	A>T	Missense	OsKitaake01g041200
Chr1	3144460	C>T	Missense	OsKitaake01g041200
Chr1	3144461	T>C	Missense	OsKitaake01g041200
Chr1	3144466	G>C	Missense	OsKitaake01g041200
Chr1	3144470	C>T	Missense	OsKitaake01g041200
Chr1	3144472	T>A	Missense	OsKitaake01g041200
Chr1	3144516	C>T	Missense	OsKitaake01g041200
Chr1	3144517	C>T	Missense	OsKitaake01g041200
Chr1	3144522	A>G	Missense	OsKitaake01g041200
Chr1	3144528	C>A	Missense	OsKitaake01g041200
Chr1	3144529	G>T	Missense	OsKitaake01g041200
Chr1	3144530	T>G	Missense	OsKitaake01g041200
Chr1	3144538	C>T	Missense	OsKitaake01g041200
Chr1	3144540	T>A	Missense	OsKitaake01g041200
Chr1	3144541	T>C	Missense	OsKitaake01g041200
Chr1	3144546	G>T	Missense	OsKitaake01g041200
Chr1	3144581	T>A	Missense	OsKitaake01g041200
Chr1	3144589	G>A	Missense	OsKitaake01g041200
Chr1	3144606	A>T	Missense	OsKitaake01g041200
Chr1	3144621	T>A	Missense	OsKitaake01g041200
Chr1	3144622	G>A	Missense	OsKitaake01g041200
Chr1	3144649	T>C	Missense	OsKitaake01g041200
Chr1	3144656	T>A	Missense	OsKitaake01g041200
Chr1	3144658	T>C	Missense	OsKitaake01g041200
Chr1	3144672	A>G	Missense	OsKitaake01g041200
Chr1	3144676	T>C	Missense	OsKitaake01g041200
Chr1	3144693	A>G	Missense	OsKitaake01g041200
Chr1	3144695	T>C	Missense	OsKitaake01g041200
Chr1	3144696	A>G	Missense	OsKitaake01g041200
Chr1	3144708	T>C	Missense	OsKitaake01g041200
Chr1	3144711	G>T	Missense	OsKitaake01g041200
Chr1	3144731	C>A	Missense	OsKitaake01g041200
Chr1	3144754	T>C	Missense	OsKitaake01g041200
Chr1	3144765	G>A	Missense	OsKitaake01g041200
Chr1	3144771	A>T	Missense	OsKitaake01g041200
Chr1	3144785	T>A	Missense	OsKitaake01g041200
Chr1	3144822	A>G	Missense	OsKitaake01g041200
Chr1	3144832	G>C	Missense	OsKitaake01g041200
Chr1	3144848	A>C	Missense	OsKitaake01g041200
Chr1	3144854	A>T	Missense	OsKitaake01g041200
Chr1	3144867	G>T	Missense	OsKitaake01g041200
Chr1	3144879	T>C	Missense	OsKitaake01g041200
Chr1	3144888	G>T	Missense	OsKitaake01g041200
Chr1	3144895	C>G	Missense	OsKitaake01g041200
Chr1	3144903	G>C	Missense	OsKitaake01g041200
Chr1	3144904	T>C	Missense	OsKitaake01g041200
Chr1	3144914	C>A	Missense	OsKitaake01g041200
Chr1	3144916	T>G	Missense	OsKitaake01g041200
Chr1	3144919	C>T	Missense	OsKitaake01g041200
Chr1	3144925	G>C	Missense	OsKitaake01g041200
Chr1	3144927	A>G	Missense	OsKitaake01g041200
Chr1	3144958	C>T	Missense	OsKitaake01g041200
Chr1	3144972	G>A	Missense	OsKitaake01g041200
Chr1	3144973	T>C	Missense	OsKitaake01g041200
Chr1	3145007	C>T	Missense	OsKitaake01g041200
Chr1	3145011	C>G	Missense	OsKitaake01g041200
Chr1	3145012	T>A	Missense	OsKitaake01g041200
Chr1	3145017	G>A	Missense	OsKitaake01g041200
Chr1	3145018	A>C	Missense	OsKitaake01g041200
Chr1	3145025	T>A	Missense	OsKitaake01g041200
Chr1	3145046	A>C	Missense	OsKitaake01g041200
Chr1	3145075	G>A	Missense	OsKitaake01g041200
Chr1	3145082	A>T	Missense	OsKitaake01g041200
Chr1	3145084	T>C	Missense	OsKitaake01g041200
Chr1	3145098	C>G	Missense	OsKitaake01g041200
Chr1	3145115	C>A	Missense	OsKitaake01g041200
Chr1	3145117	C>T	Missense	OsKitaake01g041200
Chr1	3145133	A>T	Missense	OsKitaake01g041200
Chr1	3145135	T>C	Missense	OsKitaake01g041200
Chr1	3145137	C>G	Missense	OsKitaake01g041200
Chr1	3145146	T>C	Missense	OsKitaake01g041200
Chr1	3145147	C>T	Missense	OsKitaake01g041200
Chr1	3145155	G>A	Missense	OsKitaake01g041200
Chr1	3145168	T>C	Missense	OsKitaake01g041200
Chr1	3145173	T>C	Missense	OsKitaake01g041200
Chr1	3145177	T>C	Missense	OsKitaake01g041200
Chr1	3145182	G>T	Missense	OsKitaake01g041200
Chr1	3145186	C>T	Missense	OsKitaake01g041200
Chr1	3145188	G>T	Missense	OsKitaake01g041200
Chr1	3145203	C>T	Missense	OsKitaake01g041200
Chr1	3145207	T>A	Missense	OsKitaake01g041200
Chr1	3145215	A>T	Missense	OsKitaake01g041200
Chr1	3145224	T>G	Missense	OsKitaake01g041200
Chr1	3145231	G>A	Missense	OsKitaake01g041200
Chr1	3145236	T>C	Missense	OsKitaake01g041200
Chr1	3145239	A>G	Missense	OsKitaake01g041200
Chr1	3145268	G>T	Missense	OsKitaake01g041200
Chr1	3145279	G>T	Missense	OsKitaake01g041200
Chr1	3145298	C>A	Missense	OsKitaake01g041200
Chr1	3145299	C>A	Missense	OsKitaake01g041200
Chr1	3145310	C>G	Missense	OsKitaake01g041200
Chr1	3145311	C>T	Stop gained	OsKitaake01g041200
Chr1	3145312	A>C	Missense	OsKitaake01g041200
Chr1	3145318	A>G	Missense	OsKitaake01g041200
Chr1	3145332	A>G	Missense	OsKitaake01g041200
Chr1	3145348	T>A	Missense	OsKitaake01g041200
Chr1	3145368	G>A	Missense	OsKitaake01g041200
Chr1	3145375	A>G	Missense	OsKitaake01g041200
Chr1	3145380	T>C	Missense	OsKitaake01g041200
Chr1	3145381	G>T	Missense	OsKitaake01g041200
Chr1	3145419	T>C	Missense	OsKitaake01g041200
Chr1	3145423	A>G	Missense	OsKitaake01g041200
Chr1	3145428	T>G	Missense	OsKitaake01g041200
Chr1	3145429	C>T	Missense	OsKitaake01g041200
Chr1	3145431	C>G	Missense	OsKitaake01g041200
Chr1	3145451	C>A	Missense	OsKitaake01g041200
Chr1	3145452	A>G	Missense	OsKitaake01g041200
Chr1	3145453	A>C	Missense	OsKitaake01g041200
Chr1	3145458	T>C	Missense	OsKitaake01g041200
Chr1	3145468	C>G	Missense	OsKitaake01g041200
Chr1	3145495	T>C	Missense	OsKitaake01g041200
Chr1	3145505	C>G	Missense	OsKitaake01g041200
Chr1	3145516	G>T	Missense	OsKitaake01g041200
Chr1	3145518	T>G	Missense	OsKitaake01g041200
Chr1	3145526	A>T	Missense	OsKitaake01g041200
Chr1	3145543	A>C	Missense	OsKitaake01g041200
Chr1	3145571	T>G	Missense	OsKitaake01g041200
Chr1	3169029	T>A	Splice acceptor	OsKitaake01g041400
Chr1	3175381	T>A	Missense	OsKitaake01g041500
Chr1	3176611	T>C	Missense	OsKitaake01g041500
Chr1	3178253	A>G	Missense	OsKitaake01g041500
Chr1	3197015	C>T	Missense	OsKitaake01g041700
Chr1	3197546	A>C	Missense	OsKitaake01g041700
Chr1	3230333	A>G	Missense	OsKitaake01g042200
Chr1	3237577	G>T	Missense	OsKitaake01g042300
Chr1	3239872	T>C	Missense	OsKitaake01g042300
Chr1	3243766	A>G	Missense	OsKitaake01g042400
Chr1	3243774	T>C	Missense	OsKitaake01g042400
Chr1	3243780	C>T	Missense	OsKitaake01g042400
Chr1	3243795	G>A	Missense	OsKitaake01g042400
Chr1	3243957	G>A	Missense	OsKitaake01g042400
Chr1	3243992	C>G	Missense	OsKitaake01g042400
Chr1	3244026	G>C	Missense	OsKitaake01g042400
Chr1	3244130	C>A	Missense	OsKitaake01g042400
Chr1	3244171	T>C	Missense	OsKitaake01g042400
Chr1	3244203	G>A	Missense	OsKitaake01g042400
Chr1	3244230	G>C	Missense	OsKitaake01g042400
Chr1	3244237	T>G	Missense	OsKitaake01g042400
Chr1	3244263	G>A	Missense	OsKitaake01g042400
Chr1	3244264	T>C	Missense	OsKitaake01g042400
Chr1	3244288	A>T	Missense	OsKitaake01g042400
Chr1	3244298	G>T	Missense	OsKitaake01g042400
Chr1	3244315	T>C	Missense	OsKitaake01g042400
Chr1	3244321	C>A	Missense	OsKitaake01g042400
Chr1	3244324	C>T	Missense	OsKitaake01g042400
Chr1	3244327	T>A	Missense	OsKitaake01g042400
Chr1	3245201	T>A	Missense	OsKitaake01g042400
Chr1	3245272	T>C	Missense	OsKitaake01g042400
Chr1	3245314	T>C	Missense	OsKitaake01g042400
Chr1	3245613	G>C	Missense	OsKitaake01g042400
Chr1	3245692	T>A	Missense	OsKitaake01g042400
Chr1	3245973	C>T	Missense	OsKitaake01g042400
Chr1	3246070	C>G	Missense	OsKitaake01g042400
Chr1	3246082	C>T	Missense	OsKitaake01g042400
Chr1	3246102	C>G	Missense	OsKitaake01g042400
Chr1	3246397	A>C	Missense	OsKitaake01g042400
Chr1	3246426	T>C	Missense	OsKitaake01g042400
Chr1	3246610	C>G	Missense	OsKitaake01g042400
Chr1	3246661	C>A	Missense	OsKitaake01g042400
Chr1	3246682	G>C	Missense	OsKitaake01g042400
Chr1	3260005	A>C	Missense	OsKitaake01g042700
Chr1	3260145	T>C	Missense	OsKitaake01g042700
Chr1	3260211	G>A	Missense	OsKitaake01g042700
Chr1	3260667	G>A	Missense	OsKitaake01g042700
Chr1	3273169	A>T	Missense	OsKitaake01g042900
Chr1	3275106	C>T	Missense	OsKitaake01g042900
Chr1	3275122	G>A	Missense	OsKitaake01g042900
Chr1	3275127	C>A	Missense	OsKitaake01g042900
Chr1	3275133	T>G	Missense	OsKitaake01g042900
Chr1	3275154	A>T	Missense	OsKitaake01g042900
Chr1	3275159	G>T	Missense	OsKitaake01g042900
Chr1	3275184	A>T	Missense	OsKitaake01g042900
Chr1	3275196	G>A	Missense	OsKitaake01g042900
Chr1	3275197	G>A	Missense	OsKitaake01g042900
Chr1	3275205	C>A	Missense	OsKitaake01g042900
Chr1	3275241	C>G	Missense	OsKitaake01g042900
Chr1	3275247	C>G	Missense	OsKitaake01g042900
Chr1	3275281	T>C	Missense	OsKitaake01g042900
Chr1	3275293	G>A	Missense	OsKitaake01g042900
Chr1	3275303	C>G	Missense	OsKitaake01g042900
Chr1	3275323	C>G	Missense	OsKitaake01g042900
Chr1	3275332	C>T	Missense	OsKitaake01g042900
Chr1	3275383	G>A	Missense	OsKitaake01g042900
Chr1	3275405	T>A	Missense	OsKitaake01g042900
Chr1	3275406	A>G	Missense	OsKitaake01g042900
Chr1	3275407	C>T	Missense	OsKitaake01g042900
Chr1	3275430	G>A	Missense	OsKitaake01g042900
Chr1	3275469	T>A	Missense	OsKitaake01g042900
Chr1	3275483	C>A	Missense	OsKitaake01g042900
Chr1	3275485	A>G	Missense	OsKitaake01g042900
Chr1	3275486	A>C	Missense	OsKitaake01g042900
Chr1	3275493	A>G	Missense	OsKitaake01g042900
Chr1	3275495	T>A	Missense	OsKitaake01g042900
Chr1	3275551	A>G	Missense	OsKitaake01g042900
Chr1	3275557	A>C	Missense	OsKitaake01g042900
Chr1	3275566	C>T	Missense	OsKitaake01g042900
Chr1	3275591	C>A	Missense	OsKitaake01g042900
Chr1	3275595	G>A	Missense	OsKitaake01g042900
Chr1	3275603	T>A	Missense	OsKitaake01g042900
Chr1	3275604	G>A	Missense	OsKitaake01g042900
Chr1	3275608	C>T	Missense	OsKitaake01g042900
Chr1	3275620	A>T	Missense	OsKitaake01g042900
Chr1	3275622	A>G	Missense	OsKitaake01g042900
Chr1	3275634	A>C	Missense	OsKitaake01g042900
Chr1	3275640	A>G	Missense	OsKitaake01g042900
Chr1	3275653	C>A	Missense	OsKitaake01g042900
Chr1	3275656	C>T	Missense	OsKitaake01g042900
Chr1	3275667	A>T	Missense	OsKitaake01g042900
Chr1	3275679	A>G	Missense	OsKitaake01g042900
Chr1	3275687	G>C	Missense	OsKitaake01g042900
Chr1	3275689	T>A	Missense	OsKitaake01g042900
Chr1	3275690	G>T	Missense	OsKitaake01g042900
Chr1	3275691	G>T	Stop gained	OsKitaake01g042900
Chr1	3275718	C>A	Missense	OsKitaake01g042900
Chr1	3275757	A>G	Missense	OsKitaake01g042900
Chr1	3275765	G>T	Missense	OsKitaake01g042900
Chr1	3275787	A>G	Missense	OsKitaake01g042900
Chr1	3275823	A>G	Missense	OsKitaake01g042900
Chr1	3275833	G>C	Missense	OsKitaake01g042900
Chr1	3275842	G>A	Missense	OsKitaake01g042900
Chr1	3275849	G>C	Missense	OsKitaake01g042900
Chr1	3275932	T>C	Missense	OsKitaake01g042900
Chr1	3275953	A>T	Missense	OsKitaake01g042900
Chr1	3275980	T>C	Missense	OsKitaake01g042900
Chr1	3275992	C>T	Missense	OsKitaake01g042900
Chr1	3276052	T>G	Missense	OsKitaake01g042900
Chr1	3276058	G>A	Missense	OsKitaake01g042900
Chr1	3276090	G>C	Missense	OsKitaake01g042900
Chr1	3276168	G>A	Missense	OsKitaake01g042900
Chr1	3276180	A>T	Missense	OsKitaake01g042900
Chr1	3300464	A>G	Missense	OsKitaake01g043200
Chr1	3301019	A>C	Missense	OsKitaake01g043200
Chr1	3301025	G>C	Missense	OsKitaake01g043200
Chr1	3301070	G>C	Missense	OsKitaake01g043200
Chr1	3301222	G>C	Missense	OsKitaake01g043200
Chr1	3301244	G>A	Missense	OsKitaake01g043200
Chr1	3301245	G>A	Missense	OsKitaake01g043200
Chr1	3301411	A>G	Missense	OsKitaake01g043200
Chr1	3301424	G>A	Missense	OsKitaake01g043200
Chr1	3301463	A>G	Missense	OsKitaake01g043200
Chr1	3301500	A>G	Missense	OsKitaake01g043200
Chr1	3301525	C>G	Missense	OsKitaake01g043200
Chr1	3301586	T>G	Missense	OsKitaake01g043200
Chr1	3301659	A>C	Missense	OsKitaake01g043200
Chr1	3301730	G>T	Missense	OsKitaake01g043200
Chr1	3301742	C>T	Missense	OsKitaake01g043200
Chr1	3301745	T>C	Missense	OsKitaake01g043200
Chr1	3301746	A>T	Missense	OsKitaake01g043200
Chr1	3301957	G>T	Missense	OsKitaake01g043200
Chr1	3301999	A>T	Missense	OsKitaake01g043200
Chr1	3302057	C>A	Missense	OsKitaake01g043200
Chr1	3302062	C>G	Missense	OsKitaake01g043200
Chr1	3302063	A>T	Missense	OsKitaake01g043200
Chr1	3302064	C>G	Missense	OsKitaake01g043200
Chr1	3302068	G>C	Missense	OsKitaake01g043200
Chr1	3302103	G>C	Missense	OsKitaake01g043200
Chr1	3302212	G>T	Missense	OsKitaake01g043200
Chr1	3302491	T>A	Missense	OsKitaake01g043200
Chr1	3302492	A>C	Missense	OsKitaake01g043200
Chr1	3302495	C>G	Missense	OsKitaake01g043200
Chr1	3302497	T>G	Missense	OsKitaake01g043200
Chr1	3302503	C>G	Missense	OsKitaake01g043200
Chr1	3302546	A>G	Missense	OsKitaake01g043200
Chr1	3302614	G>A	Missense	OsKitaake01g043200
Chr1	3302638	C>T	Missense	OsKitaake01g043200
Chr1	3302647	A>G	Missense	OsKitaake01g043200
Chr1	3302714	T>A	Missense	OsKitaake01g043200
Chr1	3303109	G>A	Missense	OsKitaake01g043200
Chr1	3303601	T>C	Missense	OsKitaake01g043200
Chr1	3303745	G>A	Missense	OsKitaake01g043200
Chr1	3303760	T>G	Missense	OsKitaake01g043200
Chr1	3318020	T>G	Missense	OsKitaake01g043300
Chr1	3318024	T>C	Missense	OsKitaake01g043300
Chr1	3318025	G>A	Missense	OsKitaake01g043300
Chr1	3318026	C>G	Missense	OsKitaake01g043300
Chr1	3318028	A>T	Missense	OsKitaake01g043300
Chr1	3318060	T>G	Missense	OsKitaake01g043300
Chr1	3318076	G>A	Missense	OsKitaake01g043300
Chr1	3318085	G>C	Missense	OsKitaake01g043300
Chr1	3318099	A>G	Missense	OsKitaake01g043300
Chr1	3318112	A>G	Missense	OsKitaake01g043300
Chr1	3318157	C>T	Missense	OsKitaake01g043300
Chr1	3318166	G>A	Missense	OsKitaake01g043300
Chr1	3318275	C>G	Missense	OsKitaake01g043300
Chr1	3318282	A>C	Missense	OsKitaake01g043300
Chr1	3318360	C>G	Missense	OsKitaake01g043300
Chr1	3318382	A>C	Missense	OsKitaake01g043300
Chr1	3318385	G>A	Missense	OsKitaake01g043300
Chr1	3318393	G>A	Missense	OsKitaake01g043300
Chr1	3318413	A>C	Missense	OsKitaake01g043300
Chr1	3318417	G>T	Missense	OsKitaake01g043300
Chr1	3318432	G>A	Missense	OsKitaake01g043300
Chr1	3318609	G>C	Missense	OsKitaake01g043300
Chr1	3318666	T>A	Missense	OsKitaake01g043300
Chr1	3318672	G>T	Missense	OsKitaake01g043300
Chr1	3318716	G>A	Missense	OsKitaake01g043300
Chr1	3318730	C>T	Missense	OsKitaake01g043300
Chr1	3318735	C>T	Stop gained	OsKitaake01g043300
Chr1	3318736	A>G	Missense	OsKitaake01g043300
Chr1	3318745	G>A	Missense	OsKitaake01g043300
Chr1	3318764	A>C	Missense	OsKitaake01g043300
Chr1	3318774	T>A	Missense	OsKitaake01g043300
Chr1	3318805	G>A	Missense	OsKitaake01g043300
Chr1	3318845	G>C	Missense	OsKitaake01g043300
Chr1	3318852	C>A	Missense	OsKitaake01g043300
Chr1	3318876	T>A	Missense	OsKitaake01g043300
Chr1	3318877	G>T	Missense	OsKitaake01g043300
Chr1	3318882	T>A	Missense	OsKitaake01g043300
Chr1	3318888	A>G	Missense	OsKitaake01g043300
Chr1	3318897	G>A	Missense	OsKitaake01g043300
Chr1	3318916	C>T	Missense	OsKitaake01g043300
Chr1	3318918	A>G	Missense	OsKitaake01g043300
Chr1	3318942	G>T	Missense	OsKitaake01g043300
Chr1	3318948	G>A	Missense	OsKitaake01g043300
Chr1	3318951	G>T	Missense	OsKitaake01g043300
Chr1	3318963	A>C	Missense	OsKitaake01g043300
Chr1	3318973	T>C	Missense	OsKitaake01g043300
Chr1	3319017	T>G	Missense	OsKitaake01g043300
Chr1	3319116	T>A	Missense	OsKitaake01g043300
Chr1	3319244	T>G	Missense	OsKitaake01g043300
Chr1	3319324	G>A	Missense	OsKitaake01g043300
Chr1	3319397	A>C	Missense	OsKitaake01g043300
Chr1	3319462	G>T	Missense	OsKitaake01g043300
Chr1	3322155	G>A	Missense	OsKitaake01g043300
Chr1	3322161	C>T	Missense	OsKitaake01g043300
Chr1	3322165	T>G	Missense	OsKitaake01g043300
Chr1	3322180	G>A	Missense	OsKitaake01g043300
Chr1	3322185	G>A	Missense	OsKitaake01g043300
Chr1	3322186	G>T	Missense	OsKitaake01g043300
Chr1	3322189	C>G	Missense	OsKitaake01g043300
Chr1	3322228	T>C	Missense	OsKitaake01g043300
Chr1	3322239	C>T	Missense	OsKitaake01g043300
Chr1	3322246	G>C	Missense	OsKitaake01g043300
Chr1	3322248	G>T	Missense	OsKitaake01g043300
Chr1	3322260	G>A	Missense	OsKitaake01g043300
Chr1	3322262	T>C	Splice donor	OsKitaake01g043300
Chr1	3322317	T>A	Missense	OsKitaake01g043300
Chr1	3322333	A>G	Missense	OsKitaake01g043300
Chr1	3322379	T>G	Missense	OsKitaake01g043300
Chr1	3322392	C>G	Missense	OsKitaake01g043300
Chr1	3322446	G>A	Missense	OsKitaake01g043300
Chr1	3322464	T>C	Missense	OsKitaake01g043300
Chr1	3322482	T>C	Missense	OsKitaake01g043300
Chr1	3322543	G>C	Missense	OsKitaake01g043300
Chr1	3322629	G>A	Missense	OsKitaake01g043300
Chr1	3322732	G>T	Missense	OsKitaake01g043300
Chr1	3322806	T>C	Missense	OsKitaake01g043300
Chr1	3322915	T>C	Missense	OsKitaake01g043300
Chr1	3323118	C>G	Missense	OsKitaake01g043300
Chr1	3323124	A>G	Missense	OsKitaake01g043300
Chr1	3323137	T>C	Missense	OsKitaake01g043300
Chr1	3323182	C>A	Missense	OsKitaake01g043300
Chr1	3323223	T>A	Missense	OsKitaake01g043300
Chr1	3323225	C>A	Missense	OsKitaake01g043300
Chr1	3323227	T>A	Missense	OsKitaake01g043300
Chr1	3323250	G>A	Missense	OsKitaake01g043300
Chr1	3323271	C>T	Stop gained	OsKitaake01g043300
Chr1	3323273	G>T	Missense	OsKitaake01g043300
Chr1	3323351	C>G	Missense	OsKitaake01g043300
Chr1	3323371	A>T	Missense	OsKitaake01g043300
Chr1	3323372	C>A	Missense	OsKitaake01g043300
Chr1	3323374	A>C	Missense	OsKitaake01g043300
Chr1	3323381	G>C	Missense	OsKitaake01g043300
Chr1	3323383	G>A	Missense	OsKitaake01g043300
Chr1	3323385	G>C	Missense	OsKitaake01g043300
Chr1	3323400	G>C	Missense	OsKitaake01g043300
Chr1	3323401	A>G	Missense	OsKitaake01g043300
Chr1	3323410	T>C	Missense	OsKitaake01g043300
Chr1	3323413	A>G	Missense	OsKitaake01g043300
Chr1	3323415	G>A	Missense	OsKitaake01g043300
Chr1	3323416	C>T	Missense	OsKitaake01g043300
Chr1	3323421	G>C	Missense	OsKitaake01g043300
Chr1	3323437	T>A	Missense	OsKitaake01g043300
Chr1	3323449	G>C	Missense	OsKitaake01g043300
Chr1	3323460	G>A	Missense	OsKitaake01g043300
Chr1	3323461	G>A	Missense	OsKitaake01g043300
Chr1	3323464	T>C	Missense	OsKitaake01g043300
Chr1	3323465	G>T	Missense	OsKitaake01g043300
Chr1	3323470	C>T	Missense	OsKitaake01g043300
Chr1	3323499	T>G	Missense	OsKitaake01g043300
Chr1	3323500	T>C	Missense	OsKitaake01g043300
Chr1	3323548	T>G	Stop gained	OsKitaake01g043300
Chr1	3323550	C>G	Missense	OsKitaake01g043300
Chr1	3323551	A>G	Missense	OsKitaake01g043300
Chr1	3323560	T>C	Missense	OsKitaake01g043300
Chr1	3323563	T>C	Missense	OsKitaake01g043300
Chr1	3323569	G>A	Missense	OsKitaake01g043300
Chr1	3323574	C>T	Missense	OsKitaake01g043300
Chr1	3323580	A>C	Missense	OsKitaake01g043300
Chr1	3323586	T>C	Missense	OsKitaake01g043300
Chr1	3323599	T>C	Missense	OsKitaake01g043300
Chr1	3323604	G>C	Missense	OsKitaake01g043300
Chr1	3323613	C>T	Missense	OsKitaake01g043300
Chr1	3323637	G>C	Missense	OsKitaake01g043300
Chr1	3323686	C>T	Missense	OsKitaake01g043300
Chr1	3323688	G>C	Missense	OsKitaake01g043300
Chr1	3323785	A>G	Missense	OsKitaake01g043300
Chr1	3323808	T>A	Missense	OsKitaake01g043300
Chr1	3323826	C>T	Missense	OsKitaake01g043300
Chr1	3323908	A>G	Missense	OsKitaake01g043300
Chr1	3326880	T>C	Missense	OsKitaake01g043500
Chr1	3327061	G>C	Missense	OsKitaake01g043500
Chr1	3327234	T>G	Missense	OsKitaake01g043500
Chr1	3327343	C>T	Missense	OsKitaake01g043500
Chr1	3327466	G>A	Missense	OsKitaake01g043500
Chr1	3327472	A>G	Missense	OsKitaake01g043500
Chr1	3327499	T>G	Missense	OsKitaake01g043500
Chr1	3327578	G>C	Missense	OsKitaake01g043500
Chr1	3327594	G>A	Missense	OsKitaake01g043500
Chr1	3327744	A>G	Missense	OsKitaake01g043500
Chr1	3327790	G>A	Missense	OsKitaake01g043500
Chr1	3327822	A>C	Missense	OsKitaake01g043500
Chr1	3328049	T>A	Missense	OsKitaake01g043500
Chr1	3331461	C>A	Missense	OsKitaake01g043500
Chr1	3331609	A>C	Missense	OsKitaake01g043500
Chr1	3331760	G>T	Stop gained	OsKitaake01g043500
Chr1	3331764	T>C	Missense	OsKitaake01g043500
Chr1	3331776	C>A	Missense	OsKitaake01g043500
Chr1	3331833	A>G	Missense	OsKitaake01g043500
Chr1	3331895	T>G	Missense	OsKitaake01g043500
Chr1	3331939	A>T	Missense	OsKitaake01g043500
Chr1	3331941	G>T	Missense	OsKitaake01g043500
Chr1	3332050	A>C	Missense	OsKitaake01g043500
Chr1	3332070	T>C	Missense	OsKitaake01g043500
Chr1	3332077	G>T	Missense	OsKitaake01g043500
Chr1	3332117	G>A	Missense	OsKitaake01g043500
Chr1	3332123	T>C	Missense	OsKitaake01g043500
Chr1	3332144	A>G	Missense	OsKitaake01g043500
Chr1	3332172	G>A	Missense	OsKitaake01g043500
Chr1	3332189	C>A	Missense	OsKitaake01g043500
Chr1	3332192	A>G	Missense	OsKitaake01g043500
Chr1	3332223	T>C	Missense	OsKitaake01g043500
Chr1	3332232	T>C	Missense	OsKitaake01g043500
Chr1	3332270	C>G	Missense	OsKitaake01g043500
Chr1	3332283	A>G	Missense	OsKitaake01g043500
Chr1	3332288	A>G	Missense	OsKitaake01g043500
Chr1	3332435	G>T	Missense	OsKitaake01g043500
Chr1	3332565	G>A	Missense	OsKitaake01g043500
Chr1	3332567	A>G	Missense	OsKitaake01g043500
Chr1	3332570	G>T	Missense	OsKitaake01g043500
Chr1	3332573	T>C	Missense	OsKitaake01g043500
Chr1	3332582	A>T	Missense	OsKitaake01g043500
Chr1	3332585	G>A	Missense	OsKitaake01g043500
Chr1	3332588	T>C	Missense	OsKitaake01g043500
Chr1	3332595	C>A	Missense	OsKitaake01g043500
Chr1	3332628	G>A	Missense	OsKitaake01g043500
Chr1	3332632	A>C	Missense	OsKitaake01g043500
Chr1	3332645	T>C	Missense	OsKitaake01g043500
Chr1	3332648	T>C	Missense	OsKitaake01g043500
Chr1	3332683	T>A	Missense	OsKitaake01g043500
Chr1	3332684	C>A	Missense	OsKitaake01g043500
Chr1	3332695	T>G	Missense	OsKitaake01g043500
Chr1	3332696	A>G	Missense	OsKitaake01g043500
Chr1	3332697	A>G	Missense	OsKitaake01g043500
Chr1	3332701	A>C	Missense	OsKitaake01g043500
Chr1	3332711	T>C	Missense	OsKitaake01g043500
Chr1	3332715	G>C	Missense	OsKitaake01g043500
Chr1	3332722	A>C	Missense	OsKitaake01g043500
Chr1	3332723	G>A	Missense	OsKitaake01g043500
Chr1	3332724	T>C	Missense	OsKitaake01g043500
Chr1	3332727	G>A	Missense	OsKitaake01g043500
Chr1	3332731	G>A	Missense	OsKitaake01g043500
Chr1	3332733	A>C	Missense	OsKitaake01g043500
Chr1	3332735	G>T	Missense	OsKitaake01g043500
Chr1	3332736	G>T	Missense	OsKitaake01g043500
Chr1	3332740	A>C	Missense	OsKitaake01g043500
Chr1	3332753	G>A	Missense	OsKitaake01g043500
Chr1	3332756	A>G	Missense	OsKitaake01g043500
Chr1	3332757	C>T	Missense	OsKitaake01g043500
Chr1	3332759	A>G	Missense	OsKitaake01g043500
Chr1	3332763	C>A	Missense	OsKitaake01g043500
Chr1	3332774	A>G	Missense	OsKitaake01g043500
Chr1	3332775	A>G	Missense	OsKitaake01g043500
Chr1	3332778	T>C	Missense	OsKitaake01g043500
Chr1	3332784	C>T	Missense	OsKitaake01g043500
Chr1	3332814	C>T	Missense	OsKitaake01g043500
Chr1	3332828	A>G	Missense	OsKitaake01g043500
Chr1	3332837	A>T	Missense	OsKitaake01g043500
Chr1	3342282	T>G	Start lost	OsKitaake01g043600
Chr1	3342353	C>A	Missense	OsKitaake01g043600
Chr1	3342945	G>A	Missense	OsKitaake01g043600
Chr1	3342959	G>A	Missense	OsKitaake01g043600
Chr1	3342974	G>A	Missense	OsKitaake01g043600
Chr1	3343118	A>G	Missense	OsKitaake01g043600
Chr1	3343167	A>G	Missense	OsKitaake01g043600
Chr1	3343172	C>A	Missense	OsKitaake01g043600
Chr1	3343493	C>A	Missense	OsKitaake01g043600
Chr1	3343499	A>G	Missense	OsKitaake01g043600
Chr1	3343536	T>C	Missense	OsKitaake01g043600
Chr1	3344052	G>C	Missense	OsKitaake01g043600
Chr1	3344145	A>C	Missense	OsKitaake01g043600
Chr1	3344236	T>G	Missense	OsKitaake01g043600
Chr1	3344283	G>T	Missense	OsKitaake01g043600
Chr1	3344441	T>C	Missense	OsKitaake01g043600
Chr1	3344476	A>C	Missense	OsKitaake01g043600
Chr1	3344813	G>A	Missense	OsKitaake01g043600
Chr1	3346001	A>T	Missense	OsKitaake01g043700
Chr1	3346049	A>G	Missense	OsKitaake01g043700
Chr1	3347087	G>A	Missense	OsKitaake01g043800
Chr1	3347150	T>C	Missense	OsKitaake01g043800
Chr1	3347294	A>G	Missense	OsKitaake01g043800
Chr1	3347342	C>T	Missense	OsKitaake01g043800
Chr1	3347400	A>C	Missense	OsKitaake01g043800
Chr1	3347406	G>A	Missense	OsKitaake01g043800
Chr1	3347420	C>T	Missense	OsKitaake01g043800
Chr1	3347478	C>A	Missense	OsKitaake01g043800
Chr1	3347525	G>T	Missense	OsKitaake01g043800
Chr1	3349740	C>T	Missense	OsKitaake01g043900
Chr1	3349812	A>G	Missense	OsKitaake01g043900
Chr1	3349827	T>C	Splice acceptor	OsKitaake01g043900
Chr1	3349863	G>A	Missense	OsKitaake01g043900
Chr1	3349941	T>C	Missense	OsKitaake01g043900
Chr1	3350002	G>A	Missense	OsKitaake01g043900
Chr1	3350115	G>C	Missense	OsKitaake01g043900
Chr1	3350125	A>G	Missense	OsKitaake01g043900
Chr1	3350176	C>T	Missense	OsKitaake01g043900
Chr1	3350206	G>C	Missense	OsKitaake01g043900
Chr1	3359097	C>T	Missense	OsKitaake01g044200
Chr1	3359213	G>T	Missense	OsKitaake01g044200
Chr1	3359380	C>A	Missense	OsKitaake01g044200
Chr1	3359479	G>T	Missense	OsKitaake01g044200
Chr1	3359502	G>A	Missense	OsKitaake01g044200
Chr1	3364514	T>C	Missense	OsKitaake01g044400
Chr1	3364515	G>C	Missense	OsKitaake01g044400
Chr1	3364610	C>T	Missense	OsKitaake01g044400
Chr1	3365027	A>G	Missense	OsKitaake01g044400
Chr1	3373523	A>G	Missense	OsKitaake01g044500
Chr1	3373754	G>A	Missense	OsKitaake01g044500
Chr1	3375838	T>C	Missense	OsKitaake01g044600
Chr1	3375850	C>T	Missense	OsKitaake01g044600
Chr1	3375859	G>A	Missense	OsKitaake01g044600
Chr1	3375934	A>G	Missense	OsKitaake01g044600
Chr1	3376072	G>A	Missense	OsKitaake01g044600
Chr1	3378214	C>T	Missense	OsKitaake01g044700
Chr1	3378259	C>T	Missense	OsKitaake01g044700
Chr1	3378260	T>C	Missense	OsKitaake01g044700
Chr1	3378265	T>G	Missense	OsKitaake01g044700
Chr1	3378443	C>T	Missense	OsKitaake01g044700
Chr1	3378446	T>C	Missense	OsKitaake01g044700
Chr1	3378458	C>T	Missense	OsKitaake01g044700
Chr1	3378617	A>T	Missense	OsKitaake01g044700
Chr1	3378680	G>T	Missense	OsKitaake01g044700
Chr1	3378692	C>T	Missense	OsKitaake01g044700
Chr1	3391039	G>A	Missense	OsKitaake01g045000
Chr1	3402116	G>A	Missense	OsKitaake01g045200
Chr1	3407193	T>C	Missense	OsKitaake01g045300
Chr1	3408660	G>A	Missense	OsKitaake01g045300
Chr1	3410077	C>T	Missense	OsKitaake01g045300
Chr1	3411759	A>G	Missense	OsKitaake01g045300
Chr1	3446928	C>A	Missense	OsKitaake01g045400
Chr1	3448018	C>G	Missense	OsKitaake01g045500
Chr1	3825311	C>T	Missense	OsKitaake01g051700
Chr1	4222852	G>A	Missense	OsKitaake01g056500
Chr1	4690013	A>G	Splice donor	OsKitaake01g062900
Chr1	4722429	G>T	Stop gained	OsKitaake01g063200
Chr1	4722708	A>G	Missense	OsKitaake01g063200
Chr1	4744751	C>A	Missense	OsKitaake01g063300
Chr1	4804284	A>G	Missense	OsKitaake01g064100
Chr1	4815030	A>G	Missense	OsKitaake01g064200
Chr1	4826088	A>C	Missense	OsKitaake01g064400
Chr1	4873319	T>C	Missense	OsKitaake01g065108
Chr1	4873648	C>T	Missense	OsKitaake01g065108
Chr1	4887977	C>G	Missense	OsKitaake01g065300
Chr1	4924893	C>T	Missense	OsKitaake01g065700
Chr1	4925758	T>C	Missense	OsKitaake01g065700
Chr1	4925779	A>C	Missense	OsKitaake01g065700
Chr1	4938158	A>G	Missense	OsKitaake01g065800
Chr1	4938191	A>G	Missense	OsKitaake01g065800
Chr1	4945290	T>A	Missense	OsKitaake01g065900
Chr1	4970921	A>G	Missense	OsKitaake01g066116
Chr1	5033708	T>C	Missense	OsKitaake01g066300
Chr1	5034624	T>C	Missense	OsKitaake01g066300
Chr1	5051364	G>T	Missense	OsKitaake01g066400
Chr1	5063480	T>C	Missense	OsKitaake01g066500
Chr1	5063500	G>A	Missense	OsKitaake01g066500
Chr1	5131458	A>G	Missense	OsKitaake01g067500
Chr1	5824898	C>T	Missense	OsKitaake01g073608
Chr1	5870784	C>T	Missense	OsKitaake01g074700
Chr1	5930504	C>T	Missense	OsKitaake01g075700
Chr1	6391443	G>C	Missense	OsKitaake01g080800
Chr1	6444470	C>G	Missense	OsKitaake01g081400
Chr1	6808063	C>G	Missense	OsKitaake01g085900
Chr1	6938718	T>C	Missense	OsKitaake01g087300
Chr1	7006937	G>T	Missense	OsKitaake01g087908
Chr1	7173534	A>G	Missense	OsKitaake01g089500
Chr1	7198310	C>T	Missense	OsKitaake01g089900
Chr1	7227967	C>A	Missense	OsKitaake01g090600
Chr1	7516076	A>T	Missense	OsKitaake01g094100
Chr1	7590519	G>A	Missense	OsKitaake01g095300
Chr1	8577302	C>T	Missense	OsKitaake01g107300
Chr1	8740494	A>G	Missense	OsKitaake01g109500
Chr1	8875899	T>C	Missense	OsKitaake01g110700
Chr1	8920513	G>T	Missense	OsKitaake01g111400
Chr1	8949508	T>C	Missense	OsKitaake01g111808
Chr1	8949516	T>G	Missense	OsKitaake01g111808
Chr1	8949561	T>C	Missense	OsKitaake01g111808
Chr1	8949574	T>G	Missense	OsKitaake01g111808
Chr1	8949577	C>A	Missense	OsKitaake01g111808
Chr1	8949658	A>C	Missense	OsKitaake01g111808
Chr1	8949661	C>T	Missense	OsKitaake01g111808
Chr1	8949680	T>G	Missense	OsKitaake01g111808
Chr1	8971233	T>C	Missense	OsKitaake01g112200
Chr1	8971507	C>A	Missense	OsKitaake01g112200
Chr1	8971534	C>T	Missense	OsKitaake01g112200
Chr1	9035538	C>T	Missense	OsKitaake01g116100
Chr1	9035667	G>A	Missense	OsKitaake01g116100
Chr1	9067025	C>A	Missense	OsKitaake01g116600
Chr1	9077536	C>T	Missense	OsKitaake01g116800
Chr1	9139961	G>C	Missense	OsKitaake01g117500
Chr1	9164000	T>C	Missense	OsKitaake01g117800
Chr1	9187624	T>G	Missense	OsKitaake01g118100
Chr1	9189972	A>G	Missense	OsKitaake01g118133
Chr1	9199347	G>A	Missense	OsKitaake01g118200
Chr1	9226792	A>G	Missense	OsKitaake01g118600
Chr1	9241548	C>T	Missense	OsKitaake01g118800
Chr1	9242324	C>G	Missense	OsKitaake01g118800
Chr1	9242635	A>C	Stop lost	OsKitaake01g118800
Chr1	9439763	G>T	Stop gained	OsKitaake01g121000
Chr1	9439767	C>T	Missense	OsKitaake01g121000
Chr1	9439770	C>T	Missense	OsKitaake01g121000
Chr1	9439773	C>A	Missense	OsKitaake01g121000
Chr1	9439779	C>A	Stop gained	OsKitaake01g121000
Chr1	9439782	C>T	Missense	OsKitaake01g121000
Chr1	9449540	G>A	Missense	OsKitaake01g121200
Chr1	9460538	G>T	Missense	OsKitaake01g121300
Chr1	9645858	C>T	Missense	OsKitaake01g123400
Chr1	9662458	A>G	Missense	OsKitaake01g123500
Chr1	9896159	T>C	Missense	OsKitaake01g125400
Chr1	10033215	T>C	Missense	OsKitaake01g126800
Chr1	10523871	G>A	Missense	OsKitaake01g131500
Chr1	10688906	A>G	Missense	OsKitaake01g132600
Chr1	11109898	G>A	Missense	OsKitaake01g136500
Chr1	11110541	C>T	Missense	OsKitaake01g136500
Chr1	11152312	A>C	Missense	OsKitaake01g137200
Chr1	11522326	A>G	Missense	OsKitaake01g140000
Chr1	11522452	A>G	Missense	OsKitaake01g140000
Chr1	11522679	C>T	Missense	OsKitaake01g140000
Chr1	11522762	G>C	Missense	OsKitaake01g140000
Chr1	11675624	C>G	Missense	OsKitaake01g140800
Chr1	11675632	C>T	Missense	OsKitaake01g140800
Chr1	11675635	C>A	Missense	OsKitaake01g140800
Chr1	11675641	C>G	Missense	OsKitaake01g140800
Chr1	11675653	C>G	Missense	OsKitaake01g140800
Chr1	11780165	C>G	Missense	OsKitaake01g145300
Chr1	11885443	C>T	Missense	OsKitaake01g146300
Chr1	11983777	G>C	Missense	OsKitaake01g147000
Chr1	13192113	G>T	Missense	OsKitaake01g155600
Chr1	14415395	A>G	Missense	OsKitaake01g164100
Chr1	14415455	A>G	Missense	OsKitaake01g164100
Chr1	14416031	C>T	Missense	OsKitaake01g164100
Chr1	14448922	C>A	Missense	OsKitaake01g164300
Chr1	14452213	G>C	Missense	OsKitaake01g164300
Chr1	14562872	G>T	Missense	OsKitaake01g165300
Chr1	14735044	T>C	Missense	OsKitaake01g166800
Chr1	14791046	C>T	Missense	OsKitaake01g167300
Chr1	14791551	T>C	Missense	OsKitaake01g167300
Chr1	14838171	A>C	Missense	OsKitaake01g141300
Chr1	14892072	A>C	Missense	OsKitaake01g141900
Chr1	14896797	T>C	Missense	OsKitaake01g142100
Chr1	14897429	G>T	Missense	OsKitaake01g142100
Chr1	15236063	C>T	Missense	OsKitaake01g144750
Chr1	15313175	T>C	Missense	OsKitaake01g167800
Chr1	15338720	A>G	Missense	OsKitaake01g168133
Chr1	15395074	G>A	Missense	OsKitaake01g168450
Chr1	17772414	T>C	Missense	OsKitaake01g180800
Chr1	17944688	C>A	Missense	OsKitaake01g182000
Chr1	18875505	T>G	Missense	OsKitaake01g189600
Chr1	18889979	C>G	Missense	OsKitaake01g189800
Chr1	18894445	C>A	Missense	OsKitaake01g189800
Chr1	18894482	A>G	Missense	OsKitaake01g189800
Chr1	18894491	T>C	Missense	OsKitaake01g189800
Chr1	18895394	T>C	Missense	OsKitaake01g189800
Chr1	18897020	T>C	Missense	OsKitaake01g189800
Chr1	18960988	A>G	Missense	OsKitaake01g190400
Chr1	18965773	C>T	Stop gained	OsKitaake01g190500
Chr1	18966923	A>G	Missense	OsKitaake01g190500
Chr1	18968078	T>A	Missense	OsKitaake01g190500
Chr1	18974275	T>C	Missense	OsKitaake01g190600
Chr1	18975520	A>C	Missense	OsKitaake01g190600
Chr1	18977773	A>G	Missense	OsKitaake01g190700
Chr1	19757455	C>T	Missense	OsKitaake01g196700
Chr1	20958381	G>C	Missense	OsKitaake01g205100
Chr1	20981044	A>G	Missense	OsKitaake01g205300
Chr1	21577726	T>G	Missense	OsKitaake01g207900
Chr1	21848368	A>T	Missense	OsKitaake01g210400
Chr1	23189191	G>C	Missense	OsKitaake01g221400
Chr1	23865301	C>A	Missense	OsKitaake01g229001
Chr1	23872865	C>T	Missense	OsKitaake01g229200
Chr1	23902990	C>G	Missense	OsKitaake01g229600
Chr1	23902996	A>C	Missense	OsKitaake01g229600
Chr1	23902999	A>C	Missense	OsKitaake01g229600
Chr1	23903005	C>A	Missense	OsKitaake01g229600
Chr1	23903014	A>C	Missense	OsKitaake01g229600
Chr1	23903161	A>G	Missense	OsKitaake01g229600
Chr1	23904148	C>A	Missense	OsKitaake01g229600
Chr1	23904150	G>A	Missense	OsKitaake01g229600
Chr1	23904163	T>C	Missense	OsKitaake01g229600
Chr1	23904167	C>G	Missense	OsKitaake01g229600
Chr1	23904205	C>T	Missense	OsKitaake01g229600
Chr1	23904210	C>G	Missense	OsKitaake01g229600
Chr1	23904360	A>T	Missense	OsKitaake01g229600
Chr1	23904460	A>C	Missense	OsKitaake01g229600
Chr1	23904483	A>G	Missense	OsKitaake01g229600
Chr1	23904484	G>T	Missense	OsKitaake01g229600
Chr1	23904489	G>A	Missense	OsKitaake01g229600
Chr1	23904495	G>A	Missense	OsKitaake01g229600
Chr1	23919457	G>A	Missense	OsKitaake01g229700
Chr1	23919474	T>C	Missense	OsKitaake01g229700
Chr1	23919514	G>A	Missense	OsKitaake01g229700
Chr1	23919637	C>T	Missense	OsKitaake01g229700
Chr1	23919646	G>A	Missense	OsKitaake01g229700
Chr1	23919682	C>A	Missense	OsKitaake01g229700
Chr1	23919688	G>C	Missense	OsKitaake01g229700
Chr1	23919745	G>A	Missense	OsKitaake01g229700
Chr1	23919826	C>T	Missense	OsKitaake01g229700
Chr1	23919873	A>G	Missense	OsKitaake01g229700
Chr1	23919949	T>C	Missense	OsKitaake01g229700
Chr1	23920449	A>G	Missense	OsKitaake01g229700
Chr1	23920724	G>A	Missense	OsKitaake01g229700
Chr1	23920818	A>T	Missense	OsKitaake01g229700
Chr1	23920844	A>G	Missense	OsKitaake01g229700
Chr1	23920932	C>T	Missense	OsKitaake01g229700
Chr1	23923471	A>G	Missense	OsKitaake01g229800
Chr1	23923477	T>C	Missense	OsKitaake01g229800
Chr1	23923496	A>G	Missense	OsKitaake01g229800
Chr1	23923708	T>C	Missense	OsKitaake01g229800
Chr1	23923715	G>A	Missense	OsKitaake01g229800
Chr1	23923718	G>A	Missense	OsKitaake01g229800
Chr1	23923834	T>C	Missense	OsKitaake01g229800
Chr1	23923946	G>A	Missense	OsKitaake01g229800
Chr1	23923960	G>T	Missense	OsKitaake01g229800
Chr1	23924285	A>G	Missense	OsKitaake01g229800
Chr1	23924561	G>A	Missense	OsKitaake01g229800
Chr1	23924630	A>G	Missense	OsKitaake01g229800
Chr1	23925433	A>T	Missense	OsKitaake01g229800
Chr1	23927217	G>A	Missense	OsKitaake01g229900
Chr1	23927225	A>C	Missense	OsKitaake01g229900
Chr1	23927270	G>A	Missense	OsKitaake01g229900
Chr1	23927402	G>T	Missense	OsKitaake01g229900
Chr1	23927858	C>A	Missense	OsKitaake01g229900
Chr1	23927894	A>C	Missense	OsKitaake01g229900
Chr1	23927912	A>C	Missense	OsKitaake01g229900
Chr1	23928036	T>A	Missense	OsKitaake01g229900
Chr1	23928131	T>C	Missense	OsKitaake01g229900
Chr1	23928950	G>A	Missense	OsKitaake01g229900
Chr1	23931188	T>G	Missense	OsKitaake01g230000
Chr1	23931190	A>G	Missense	OsKitaake01g230000
Chr1	23931193	A>C	Missense	OsKitaake01g230000
Chr1	23931214	G>C	Missense	OsKitaake01g230000
Chr1	23931228	C>T	Missense	OsKitaake01g230000
Chr1	23931294	T>C	Missense	OsKitaake01g230000
Chr1	23931331	T>G	Missense	OsKitaake01g230000
Chr1	23931334	G>A	Missense	OsKitaake01g230000
Chr1	23931676	G>A	Missense	OsKitaake01g230000
Chr1	23931792	G>A	Missense	OsKitaake01g230000
Chr1	23932070	A>C	Missense	OsKitaake01g230000
Chr1	23932348	A>G	Missense	OsKitaake01g230000
Chr1	23934324	C>G	Missense	OsKitaake01g230100
Chr1	23934725	G>C	Missense	OsKitaake01g230100
Chr1	23935203	G>A	Missense	OsKitaake01g230100
Chr1	23935348	G>A	Missense	OsKitaake01g230100
Chr1	23935797	T>A	Missense	OsKitaake01g230100
Chr1	23936038	T>G	Missense	OsKitaake01g230100
Chr1	23946275	C>T	Missense	OsKitaake01g230200
Chr1	24021758	A>C	Missense	OsKitaake01g230900
Chr1	24029376	G>T	Missense	OsKitaake01g231000
Chr1	24029808	C>A	Missense	OsKitaake01g231000
Chr1	24030320	C>G	Missense	OsKitaake01g231000
Chr1	24030553	G>T	Missense	OsKitaake01g231000
Chr1	24030652	T>C	Missense	OsKitaake01g231000
Chr1	24060275	G>A	Missense	OsKitaake01g231200
Chr1	24061172	C>A	Missense	OsKitaake01g231200
Chr1	24061176	C>T	Missense	OsKitaake01g231200
Chr1	24061576	C>A	Missense	OsKitaake01g231200
Chr1	24061687	C>T	Missense	OsKitaake01g231200
Chr1	24084434	T>C	Missense	OsKitaake01g231400
Chr1	24084536	C>T	Missense	OsKitaake01g231400
Chr1	24148118	T>G	Missense	OsKitaake01g232000
Chr1	24150163	A>T	Missense	OsKitaake01g232100
Chr1	24153449	G>A	Missense	OsKitaake01g232200
Chr1	24153474	A>T	Missense	OsKitaake01g232200
Chr1	24153753	C>T	Missense	OsKitaake01g232200
Chr1	24153794	C>T	Missense	OsKitaake01g232200
Chr1	24154077	G>A	Missense	OsKitaake01g232200
Chr1	24154104	A>G	Missense	OsKitaake01g232200
Chr1	24154200	C>T	Missense	OsKitaake01g232200
Chr1	24155576	T>C	Missense	OsKitaake01g232200
Chr1	24155599	C>T	Start lost	OsKitaake01g232200
Chr1	24164929	G>T	Missense	OsKitaake01g232400
Chr1	24177752	G>A	Missense	OsKitaake01g232500
Chr1	24187287	T>A	Missense	OsKitaake01g232700
Chr1	24187729	G>C	Missense	OsKitaake01g232700
Chr1	24187961	C>T	Missense	OsKitaake01g232700
Chr1	24187966	C>G	Missense	OsKitaake01g232700
Chr1	24188052	G>C	Missense	OsKitaake01g232700
Chr1	24188064	C>T	Missense	OsKitaake01g232700
Chr1	24188067	T>A	Missense	OsKitaake01g232700
Chr1	24188096	C>A	Missense	OsKitaake01g232700
Chr1	24188129	C>G	Missense	OsKitaake01g232700
Chr1	24188177	A>C	Missense	OsKitaake01g232700
Chr1	24188216	C>T	Missense	OsKitaake01g232700
Chr1	24188227	T>A	Missense	OsKitaake01g232700
Chr1	24188230	A>C	Stop gained	OsKitaake01g232700
Chr1	24188231	T>C	Missense	OsKitaake01g232700
Chr1	24202706	C>A	Missense	OsKitaake01g232900
Chr1	24204671	T>A	Missense	OsKitaake01g233000
Chr1	24204748	C>G	Missense	OsKitaake01g233000
Chr1	24210664	T>C	Missense	OsKitaake01g233100
Chr1	24210692	G>A	Missense	OsKitaake01g233100
Chr1	24211315	G>A	Missense	OsKitaake01g233100
Chr1	24211985	G>T	Missense	OsKitaake01g233100
Chr1	24217412	A>G	Missense	OsKitaake01g233200
Chr1	24217629	C>T	Missense	OsKitaake01g233200
Chr1	24217649	C>T	Missense	OsKitaake01g233200
Chr1	24231317	C>T	Missense	OsKitaake01g233300
Chr1	24231587	G>T	Missense	OsKitaake01g233300
Chr1	24231589	C>T	Missense	OsKitaake01g233300
Chr1	24231640	A>T	Missense	OsKitaake01g233300
Chr1	24305022	G>A	Missense	OsKitaake01g234000
Chr1	24308058	C>A	Stop gained	OsKitaake01g234000
Chr1	24309059	G>C	Missense	OsKitaake01g234000
Chr1	24328720	A>G	Missense	OsKitaake01g234201
Chr1	24329540	A>G	Missense	OsKitaake01g234300
Chr1	24366446	T>G	Missense	OsKitaake01g234600
Chr1	24366835	A>G	Missense	OsKitaake01g234600
Chr1	24366919	T>G	Missense	OsKitaake01g234600
Chr1	24369910	G>A	Missense	OsKitaake01g234700
Chr1	24373027	T>C	Missense	OsKitaake01g234700
Chr1	24373723	G>T	Missense	OsKitaake01g234700
Chr1	24374284	T>C	Missense	OsKitaake01g234700
Chr1	24376325	G>A	Missense	OsKitaake01g234700
Chr1	24376350	C>A	Missense	OsKitaake01g234700
Chr1	24376683	C>T	Missense	OsKitaake01g234700
Chr1	24382298	T>G	Missense	OsKitaake01g234700
Chr1	24385499	G>T	Missense	OsKitaake01g234800
Chr1	24385609	G>A	Missense	OsKitaake01g234800
Chr1	24386447	A>G	Missense	OsKitaake01g234800
Chr1	24460426	C>T	Missense	OsKitaake01g235132
Chr1	24490227	A>T	Missense	OsKitaake01g235600
Chr1	24523870	A>C	Missense	OsKitaake01g236250
Chr1	24524516	C>T	Missense	OsKitaake01g236250
Chr1	24525076	C>T	Missense	OsKitaake01g236250
Chr1	24597823	G>A	Missense	OsKitaake01g237700
Chr1	24624646	T>G	Missense	OsKitaake01g237900
Chr1	24624702	G>A	Missense	OsKitaake01g237900
Chr1	24881282	G>A	Missense	OsKitaake01g240300
Chr1	25134138	A>C	Missense	OsKitaake01g243300
Chr1	25204797	T>G	Missense	OsKitaake01g243800
Chr1	25217043	A>G	Missense	OsKitaake01g244000
Chr1	25385822	T>C	Missense	OsKitaake01g246100
Chr1	25465157	A>G	Missense	OsKitaake01g246800
Chr1	25466252	T>C	Missense	OsKitaake01g246800
Chr1	25466253	T>C	Missense	OsKitaake01g246800
Chr1	25466570	G>A	Missense	OsKitaake01g246800
Chr1	25538857	T>C	Missense	OsKitaake01g247566
Chr1	25592186	G>C	Missense	OsKitaake01g248500
Chr1	28422499	C>T	Missense	OsKitaake01g275300
Chr1	28469963	G>C	Missense	OsKitaake01g276100
Chr1	28491430	G>C	Missense	OsKitaake01g276433
Chr1	28515909	A>G	Missense	OsKitaake01g276700
Chr1	28699002	G>A	Missense	OsKitaake01g278500
Chr1	29742897	T>A	Missense	OsKitaake01g292200
Chr1	29844162	A>G	Missense	OsKitaake01g293100
Chr1	29848160	A>G	Missense	OsKitaake01g293200
Chr1	29851043	C>T	Stop gained	OsKitaake01g293200
Chr1	30406585	A>G	Missense	OsKitaake01g300700
Chr1	30584509	T>G	Missense	OsKitaake01g302800
Chr1	30584510	C>A	Missense	OsKitaake01g302800
Chr1	30840848	G>A	Missense	OsKitaake01g305900
Chr1	31895375	T>C	Missense	OsKitaake01g321550
Chr1	33699598	C>T	Missense	OsKitaake01g345800
Chr1	34247446	A>G	Missense	OsKitaake01g353000
Chr1	34378543	A>G	Missense	OsKitaake01g356000
Chr1	34660436	G>A	Missense	OsKitaake01g364000
Chr1	34741752	C>T	Stop gained	OsKitaake01g365300
Chr1	35292598	A>G	Missense	OsKitaake01g372100
Chr1	35296420	T>G	Missense	OsKitaake01g372200
Chr1	35328638	T>A	Missense	OsKitaake01g372600
Chr1	35391336	T>A	Missense	OsKitaake01g373250
Chr1	35391339	T>C	Missense	OsKitaake01g373250
Chr1	35391340	A>T	Missense	OsKitaake01g373250
Chr1	35391341	C>G	Stop gained	OsKitaake01g373250
Chr1	35392458	A>G	Missense	OsKitaake01g373300
Chr1	35392527	G>T	Missense	OsKitaake01g373300
Chr1	35392874	C>T	Missense	OsKitaake01g373300
Chr1	35393723	G>A	Missense	OsKitaake01g373300
Chr1	35440492	G>A	Missense	OsKitaake01g374100
Chr1	36145862	T>C	Missense	OsKitaake01g383400
Chr1	36158360	G>A	Stop gained	OsKitaake01g383901
Chr1	36158375	C>T	Missense	OsKitaake01g383901
Chr1	36177583	T>C	Missense	OsKitaake01g384100
Chr1	36180312	T>G	Missense	OsKitaake01g384200
Chr1	36354057	T>A	Missense	OsKitaake01g386000
Chr1	36354296	C>T	Missense	OsKitaake01g386000
Chr1	36354395	T>C	Missense	OsKitaake01g386000
Chr1	36405687	T>C	Missense	OsKitaake01g386500
Chr1	36966562	T>C	Missense	OsKitaake01g393700
Chr1	37335723	C>T	Missense	OsKitaake01g398401
Chr1	38681859	C>T	Missense	OsKitaake01g413400
Chr1	38903900	C>A	Missense	OsKitaake01g417500
Chr1	38935067	C>A	Missense	OsKitaake01g417800
Chr1	38939704	G>T	Missense	OsKitaake01g417800
Chr1	39312282	T>C	Missense	OsKitaake01g423200
Chr1	39319166	G>A	Missense	OsKitaake01g423500
Chr1	40093719	C>T	Missense	OsKitaake01g434800
Chr1	40830395	C>G	Missense	OsKitaake01g444300
Chr1	40853089	C>A	Missense	OsKitaake01g444700
Chr1	40973124	A>G	Missense	OsKitaake01g447100
Chr1	40973283	A>T	Missense	OsKitaake01g447100
Chr1	40984416	C>G	Missense	OsKitaake01g447200
Chr1	40995857	A>T	Missense	OsKitaake01g447500
Chr1	41003827	G>A	Missense	OsKitaake01g447600
Chr1	41108511	A>C	Missense	OsKitaake01g448700
Chr1	41172891	A>G	Missense	OsKitaake01g449400
Chr1	41277632	G>A	Missense	OsKitaake01g451000
Chr1	41447459	A>C	Missense	OsKitaake01g452600
Chr1	41533096	G>A	Missense	OsKitaake01g453500
Chr1	41533284	G>C	Missense	OsKitaake01g453500
Chr1	41541507	G>T	Missense	OsKitaake01g453700
Chr1	41542954	T>G	Missense	OsKitaake01g453700
Chr1	41554185	C>G	Missense	OsKitaake01g453900
Chr1	41554188	C>G	Missense	OsKitaake01g453900
Chr1	41601704	C>G	Missense	OsKitaake01g454200
Chr1	41610613	C>T	Missense	OsKitaake01g454400
Chr1	41611625	C>T	Missense	OsKitaake01g454400
Chr1	41924572	G>A	Missense	OsKitaake01g459400
Chr1	42101410	A>G	Missense	OsKitaake01g462300
Chr1	42963578	C>T	Missense	OsKitaake01g473700
Chr1	42972021	C>G	Missense	OsKitaake01g473900
Chr1	42997205	A>G	Missense	OsKitaake01g474400
Chr1	43073689	G>A	Missense	OsKitaake01g475300
Chr1	43269561	T>C	Missense	OsKitaake01g478100
Chr1	43275016	G>A	Missense	OsKitaake01g478200
Chr1	43282032	G>A	Missense	OsKitaake01g478400
Chr1	43282819	A>G	Missense	OsKitaake01g478400
Chr1	43410389	C>A	Missense	OsKitaake01g480500
Chr1	43410548	C>T	Missense	OsKitaake01g480500
Chr1	43413390	C>T	Missense	OsKitaake01g480600
Chr1	43590387	C>T	Missense	OsKitaake01g483900
Chr1	43590403	A>T	Missense	OsKitaake01g483900
Chr1	43590427	T>G	Missense	OsKitaake01g483900
Chr1	43590699	T>G	Missense	OsKitaake01g483900
Chr1	43592178	G>A	Missense	OsKitaake01g483900
Chr1	43653106	G>T	Missense	OsKitaake01g485100
Chr1	43719547	A>C	Missense	OsKitaake01g486300
Chr1	43943600	G>T	Missense	OsKitaake01g490100
Chr1	44005568	A>C	Missense	OsKitaake01g490700
Chr1	44006439	A>T	Missense	OsKitaake01g490700
Chr1	44007474	A>T	Missense	OsKitaake01g490700
Chr1	44015909	T>C	Missense	OsKitaake01g490800
Chr1	44017600	T>C	Missense	OsKitaake01g490800
Chr1	44019529	G>A	Missense	OsKitaake01g490800
Chr1	44029292	G>A	Missense	OsKitaake01g491000
Chr1	44029859	G>A	Missense	OsKitaake01g491000
Chr1	44078544	A>C	Missense	OsKitaake01g491700
Chr1	44180622	T>A	Missense	OsKitaake01g493400
Chr1	44201940	C>T	Missense	OsKitaake01g493800
Chr10	413653	T>A	Missense	OsKitaake10g002800
Chr10	413654	C>T	Missense	OsKitaake10g002800
Chr10	413662	T>G	Missense	OsKitaake10g002800
Chr10	413663	C>A	Missense	OsKitaake10g002800
Chr10	413666	A>C	Missense	OsKitaake10g002800
Chr10	413668	G>T	Missense	OsKitaake10g002800
Chr10	1497850	C>A	Missense	OsKitaake10g010400
Chr10	1577262	A>C	Missense	OsKitaake10g010801
Chr10	1776980	A>G	Missense	OsKitaake10g013000
Chr10	1834539	G>T	Missense	OsKitaake10g013500
Chr10	1869574	G>A	Missense	OsKitaake10g014400
Chr10	1869580	G>T	Missense	OsKitaake10g014400
Chr10	2089251	T>C	Missense	OsKitaake10g016300
Chr10	2094644	A>G	Missense	OsKitaake10g016300
Chr10	2159895	A>C	Missense	OsKitaake10g016800
Chr10	2159911	C>T	Missense	OsKitaake10g016800
Chr10	2159943	G>A	Missense	OsKitaake10g016800
Chr10	2159947	C>T	Missense	OsKitaake10g016800
Chr10	2159964	A>G	Missense	OsKitaake10g016800
Chr10	2160042	C>A	Missense	OsKitaake10g016800
Chr10	2160120	A>G	Missense	OsKitaake10g016800
Chr10	2160156	A>G	Missense	OsKitaake10g016800
Chr10	2165149	C>A	Missense	OsKitaake10g016900
Chr10	2165167	G>A	Missense	OsKitaake10g016900
Chr10	2165182	T>A	Missense	OsKitaake10g016900
Chr10	2165660	G>A	Missense	OsKitaake10g016900
Chr10	2165737	A>T	Missense	OsKitaake10g016900
Chr10	2165747	C>T	Missense	OsKitaake10g016900
Chr10	2165752	C>G	Missense	OsKitaake10g016900
Chr10	2165829	C>G	Missense	OsKitaake10g016900
Chr10	2165930	T>C	Missense	OsKitaake10g016900
Chr10	2166071	T>C	Missense	OsKitaake10g016900
Chr10	2166094	T>C	Missense	OsKitaake10g016900
Chr10	2166197	C>T	Missense	OsKitaake10g016900
Chr10	2166249	C>A	Missense	OsKitaake10g016900
Chr10	2166377	G>C	Missense	OsKitaake10g016900
Chr10	2175298	A>G	Stop lost	OsKitaake10g017000
Chr10	2175305	G>C	Missense	OsKitaake10g017000
Chr10	2175472	T>C	Missense	OsKitaake10g017000
Chr10	2175478	G>T	Missense	OsKitaake10g017000
Chr10	2175567	A>C	Missense	OsKitaake10g017000
Chr10	2175772	T>A	Missense	OsKitaake10g017000
Chr10	2175815	T>G	Missense	OsKitaake10g017000
Chr10	2175946	G>C	Missense	OsKitaake10g017000
Chr10	2176044	A>C	Missense	OsKitaake10g017000
Chr10	2176128	G>A	Missense	OsKitaake10g017000
Chr10	2189818	T>C	Missense	OsKitaake10g017100
Chr10	2196106	A>T	Missense	OsKitaake10g017200
Chr10	2196121	G>C	Missense	OsKitaake10g017200
Chr10	2196129	G>T	Missense	OsKitaake10g017200
Chr10	2196133	C>A	Missense	OsKitaake10g017200
Chr10	2196134	A>T	Missense	OsKitaake10g017200
Chr10	2196138	C>A	Missense	OsKitaake10g017200
Chr10	2196144	A>T	Missense	OsKitaake10g017200
Chr10	2196151	T>G	Missense	OsKitaake10g017200
Chr10	2196183	A>G	Missense	OsKitaake10g017200
Chr10	2196203	C>G	Missense	OsKitaake10g017200
Chr10	2196245	A>G	Missense	OsKitaake10g017200
Chr10	2196250	T>A	Missense	OsKitaake10g017200
Chr10	2196291	C>T	Missense	OsKitaake10g017200
Chr10	2196299	A>G	Missense	OsKitaake10g017200
Chr10	2196318	T>A	Missense	OsKitaake10g017200
Chr10	2196356	G>T	Missense	OsKitaake10g017200
Chr10	2196363	C>T	Missense	OsKitaake10g017200
Chr10	2196427	A>C	Missense	OsKitaake10g017200
Chr10	2196441	T>A	Missense	OsKitaake10g017200
Chr10	2196473	A>G	Missense	OsKitaake10g017200
Chr10	2196504	T>C	Missense	OsKitaake10g017200
Chr10	2196506	G>A	Missense	OsKitaake10g017200
Chr10	2196516	A>G	Missense	OsKitaake10g017200
Chr10	2196524	T>C	Missense	OsKitaake10g017200
Chr10	2196528	A>G	Missense	OsKitaake10g017200
Chr10	2196589	G>C	Missense	OsKitaake10g017200
Chr10	2196590	T>C	Missense	OsKitaake10g017200
Chr10	2196624	C>T	Missense	OsKitaake10g017200
Chr10	2196725	T>C	Missense	OsKitaake10g017200
Chr10	2196782	A>C	Missense	OsKitaake10g017200
Chr10	2196800	G>A	Missense	OsKitaake10g017200
Chr10	2196860	G>A	Missense	OsKitaake10g017200
Chr10	2196918	G>A	Missense	OsKitaake10g017200
Chr10	2197167	C>T	Missense	OsKitaake10g017200
Chr10	2197187	A>T	Missense	OsKitaake10g017200
Chr10	2236523	T>G	Missense	OsKitaake10g017800
Chr10	2246336	A>G	Missense	OsKitaake10g017900
Chr10	2283028	C>T	Stop gained	OsKitaake10g018500
Chr10	2283056	G>A	Missense	OsKitaake10g018500
Chr10	2283269	C>T	Missense	OsKitaake10g018500
Chr10	2283419	C>T	Missense	OsKitaake10g018500
Chr10	2283457	C>G	Missense	OsKitaake10g018500
Chr10	2283458	C>G	Missense	OsKitaake10g018500
Chr10	2283460	T>G	Missense	OsKitaake10g018500
Chr10	2283463	T>C	Missense	OsKitaake10g018500
Chr10	2283466	A>G	Missense	OsKitaake10g018500
Chr10	2283470	C>A	Missense	OsKitaake10g018500
Chr10	2283476	C>G	Missense	OsKitaake10g018500
Chr10	2283481	C>G	Missense	OsKitaake10g018500
Chr10	2283520	T>C	Missense	OsKitaake10g018500
Chr10	2283655	G>A	Missense	OsKitaake10g018500
Chr10	2283670	C>T	Missense	OsKitaake10g018500
Chr10	2302935	G>A	Missense	OsKitaake10g018700
Chr10	2302954	T>A	Missense	OsKitaake10g018700
Chr10	2303220	A>G	Missense	OsKitaake10g018700
Chr10	2303370	T>C	Missense	OsKitaake10g018700
Chr10	2304386	T>A	Stop lost	OsKitaake10g018900
Chr10	2304611	C>T	Missense	OsKitaake10g018900
Chr10	2304692	A>C	Missense	OsKitaake10g018900
Chr10	2307463	A>G	Missense	OsKitaake10g019000
Chr10	2308040	T>C	Missense	OsKitaake10g019000
Chr10	2357320	C>T	Missense	OsKitaake10g019300
Chr10	2357530	G>C	Missense	OsKitaake10g019300
Chr10	2423010	A>T	Missense	OsKitaake10g019533
Chr10	2423448	G>C	Missense	OsKitaake10g019533
Chr10	2427204	T>A	Missense	OsKitaake10g019566
Chr10	2427586	C>A	Missense	OsKitaake10g019566
Chr10	2449997	G>T	Missense	OsKitaake10g019600
Chr10	2450104	G>A	Missense	OsKitaake10g019600
Chr10	2555217	A>G	Missense	OsKitaake10g020100
Chr10	2563106	A>G	Missense	OsKitaake10g020200
Chr10	2601967	T>C	Missense	OsKitaake10g020700
Chr10	2617300	G>A	Missense	OsKitaake10g021100
Chr10	2633078	T>C	Missense	OsKitaake10g021200
Chr10	2633789	T>C	Missense	OsKitaake10g021200
Chr10	2633890	G>T	Missense	OsKitaake10g021200
Chr10	2634314	C>T	Missense	OsKitaake10g021200
Chr10	2634548	A>C	Missense	OsKitaake10g021200
Chr10	2634608	A>G	Missense	OsKitaake10g021200
Chr10	2634948	G>C	Missense	OsKitaake10g021200
Chr10	2640066	A>G	Missense	OsKitaake10g021250
Chr10	2640606	A>T	Missense	OsKitaake10g021250
Chr10	2640724	T>A	Missense	OsKitaake10g021250
Chr10	2640824	A>G	Missense	OsKitaake10g021250
Chr10	2640945	T>G	Missense	OsKitaake10g021250
Chr10	2645656	C>T	Missense	OsKitaake10g021300
Chr10	2647795	C>T	Missense	OsKitaake10g021300
Chr10	2663764	A>G	Missense	OsKitaake10g021600
Chr10	2663887	T>G	Missense	OsKitaake10g021600
Chr10	2667643	A>G	Missense	OsKitaake10g021700
Chr10	2670439	T>C	Missense	OsKitaake10g021700
Chr10	2695177	C>T	Missense	OsKitaake10g022100
Chr10	2695254	C>A	Missense	OsKitaake10g022100
Chr10	2701669	G>A	Missense	OsKitaake10g022200
Chr10	2701881	G>A	Missense	OsKitaake10g022200
Chr10	2702063	T>G	Missense	OsKitaake10g022200
Chr10	2702085	A>G	Missense	OsKitaake10g022200
Chr10	2702101	A>G	Missense	OsKitaake10g022200
Chr10	2702104	A>G	Missense	OsKitaake10g022200
Chr10	2702121	C>T	Missense	OsKitaake10g022200
Chr10	2702142	A>T	Missense	OsKitaake10g022200
Chr10	2702148	G>A	Missense	OsKitaake10g022200
Chr10	2702158	G>A	Missense	OsKitaake10g022200
Chr10	2702182	T>C	Missense	OsKitaake10g022200
Chr10	2702203	G>T	Missense	OsKitaake10g022200
Chr10	2702266	T>A	Missense	OsKitaake10g022200
Chr10	2702292	G>C	Missense	OsKitaake10g022200
Chr10	2702343	G>C	Missense	OsKitaake10g022200
Chr10	2702415	A>C	Missense	OsKitaake10g022200
Chr10	2702493	T>G	Missense	OsKitaake10g022200
Chr10	2702679	G>T	Missense	OsKitaake10g022200
Chr10	2702847	A>G	Missense	OsKitaake10g022200
Chr10	2703003	C>T	Missense	OsKitaake10g022200
Chr10	2703106	T>G	Missense	OsKitaake10g022200
Chr10	2703144	G>A	Missense	OsKitaake10g022200
Chr10	2703424	G>T	Missense	OsKitaake10g022200
Chr10	2729792	C>T	Missense	OsKitaake10g022400
Chr10	2729794	G>T	Missense	OsKitaake10g022400
Chr10	2729795	A>C	Missense	OsKitaake10g022400
Chr10	2729855	T>G	Missense	OsKitaake10g022400
Chr10	2729875	A>G	Missense	OsKitaake10g022400
Chr10	2730001	G>A	Missense	OsKitaake10g022400
Chr10	2730037	G>A	Missense	OsKitaake10g022400
Chr10	2730044	C>T	Missense	OsKitaake10g022400
Chr10	2730079	T>G	Missense	OsKitaake10g022400
Chr10	2730253	A>G	Missense	OsKitaake10g022400
Chr10	2730391	C>A	Missense	OsKitaake10g022400
Chr10	2730442	A>G	Missense	OsKitaake10g022400
Chr10	2730502	A>G	Missense	OsKitaake10g022400
Chr10	2730509	A>T	Missense	OsKitaake10g022400
Chr10	2730560	A>G	Missense	OsKitaake10g022400
Chr10	2730612	A>T	Missense	OsKitaake10g022400
Chr10	2730617	C>A	Missense	OsKitaake10g022400
Chr10	2730623	T>C	Missense	OsKitaake10g022400
Chr10	2730934	G>A	Missense	OsKitaake10g022400
Chr10	2730955	C>T	Missense	OsKitaake10g022400
Chr10	2730991	G>C	Missense	OsKitaake10g022400
Chr10	2731042	A>G	Missense	OsKitaake10g022400
Chr10	2731066	G>A	Missense	OsKitaake10g022400
Chr10	2731106	G>A	Missense	OsKitaake10g022400
Chr10	2731186	T>A	Missense	OsKitaake10g022400
Chr10	2731190	A>G	Missense	OsKitaake10g022400
Chr10	2731225	A>G	Missense	OsKitaake10g022400
Chr10	2731226	C>T	Missense	OsKitaake10g022400
Chr10	2731308	C>G	Missense	OsKitaake10g022400
Chr10	2731378	A>G	Missense	OsKitaake10g022400
Chr10	2731382	C>T	Missense	OsKitaake10g022400
Chr10	2731471	A>G	Missense	OsKitaake10g022400
Chr10	2731492	A>G	Missense	OsKitaake10g022400
Chr10	2732303	T>C	Missense	OsKitaake10g022500
Chr10	2732574	T>A	Missense	OsKitaake10g022500
Chr10	2732638	A>G	Missense	OsKitaake10g022500
Chr10	2733292	G>A	Missense	OsKitaake10g022500
Chr10	2733313	G>A	Missense	OsKitaake10g022500
Chr10	2733315	C>G	Missense	OsKitaake10g022500
Chr10	2733844	T>C	Missense	OsKitaake10g022500
Chr10	2734374	T>C	Missense	OsKitaake10g022500
Chr10	2741915	T>A	Missense	OsKitaake10g022600
Chr10	2742997	G>T	Missense	OsKitaake10g022600
Chr10	2743298	C>T	Missense	OsKitaake10g022600
Chr10	2743797	A>C	Missense	OsKitaake10g022600
Chr10	2770596	T>C	Missense	OsKitaake10g022700
Chr10	2796619	C>T	Missense	OsKitaake10g022900
Chr10	3641741	T>C	Missense	OsKitaake10g027200
Chr10	3838922	G>A	Missense	OsKitaake10g029100
Chr10	3974782	A>G	Missense	OsKitaake10g030000
Chr10	4833713	T>C	Splice acceptor	OsKitaake10g034732
Chr10	4896050	G>A	Missense	OsKitaake10g035400
Chr10	4907405	T>A	Start lost	OsKitaake10g035500
Chr10	4907950	G>T	Missense	OsKitaake10g035500
Chr10	4911517	G>T	Missense	OsKitaake10g035500
Chr10	4918265	T>C	Missense	OsKitaake10g035600
Chr10	5521480	A>T	Missense	OsKitaake10g038300
Chr10	5972864	G>A	Missense	OsKitaake10g040900
Chr10	6482930	C>G	Missense	OsKitaake10g044200
Chr10	7889540	G>A	Missense	OsKitaake10g049900
Chr10	8374334	A>C	Missense	OsKitaake10g052600
Chr10	9568229	G>A	Missense	OsKitaake10g055800
Chr10	9657774	C>G	Missense	OsKitaake10g056450
Chr10	9658285	T>C	Missense	OsKitaake10g056450
Chr10	10363604	C>T	Splice donor	OsKitaake10g060200
Chr10	10776892	T>G	Missense	OsKitaake10g063800
Chr10	10798263	C>G	Missense	OsKitaake10g063900
Chr10	10798273	T>C	Missense	OsKitaake10g063900
Chr10	10798451	C>T	Missense	OsKitaake10g063900
Chr10	10837297	C>G	Missense	OsKitaake10g064200
Chr10	10888494	T>C	Missense	OsKitaake10g064250
Chr10	10939092	C>A	Missense	OsKitaake10g064500
Chr10	10942226	T>C	Missense	OsKitaake10g064500
Chr10	10942442	G>A	Missense	OsKitaake10g064500
Chr10	10951084	T>C	Missense	OsKitaake10g064550
Chr10	10951166	C>T	Missense	OsKitaake10g064550
Chr10	11085331	A>T	Missense	OsKitaake10g065301
Chr10	11168304	T>C	Missense	OsKitaake10g065500
Chr10	11171351	T>C	Missense	OsKitaake10g065600
Chr10	11171575	A>G	Missense	OsKitaake10g065600
Chr10	11306475	C>G	Missense	OsKitaake10g066800
Chr10	11356717	A>G	Missense	OsKitaake10g067100
Chr10	11422498	G>T	Missense	OsKitaake10g068035
Chr10	11567641	C>T	Missense	OsKitaake10g165828
Chr10	11570082	C>A	Missense	OsKitaake10g165832
Chr10	11570485	T>C	Missense	OsKitaake10g165832
Chr10	11572073	G>A	Missense	OsKitaake10g165833
Chr10	11572193	C>A	Missense	OsKitaake10g165833
Chr10	11572194	T>G	Missense	OsKitaake10g165833
Chr10	11572377	C>A	Stop gained	OsKitaake10g165833
Chr10	11576336	C>T	Missense	OsKitaake10g165835
Chr10	11709297	A>T	Missense	OsKitaake10g070100
Chr10	12099258	C>G	Missense	OsKitaake10g072200
Chr10	12384004	A>C	Missense	OsKitaake10g074400
Chr10	13396295	C>G	Missense	OsKitaake10g080200
Chr10	14086741	G>A	Missense	OsKitaake10g087400
Chr10	14241933	G>A	Missense	OsKitaake10g089200
Chr10	15384009	T>C	Missense	OsKitaake10g098500
Chr10	15391635	C>T	Missense	OsKitaake10g098600
Chr10	15605400	G>A	Missense	OsKitaake10g101200
Chr10	15605407	G>C	Missense	OsKitaake10g101200
Chr10	15605446	G>T	Missense	OsKitaake10g101200
Chr10	15605450	G>T	Missense	OsKitaake10g101200
Chr10	15605451	G>T	Missense	OsKitaake10g101200
Chr10	16062075	G>A	Missense	OsKitaake10g106600
Chr10	16062076	C>A	Missense	OsKitaake10g106600
Chr10	16062078	G>A	Missense	OsKitaake10g106600
Chr10	16062237	G>C	Missense	OsKitaake10g106600
Chr10	16062238	C>G	Missense	OsKitaake10g106600
Chr10	16085883	T>A	Missense	OsKitaake10g106900
Chr10	16098738	C>G	Missense	OsKitaake10g107000
Chr10	16510513	A>C	Missense	OsKitaake10g112200
Chr10	17026007	T>C	Missense	OsKitaake10g116600
Chr10	17524726	C>G	Missense	OsKitaake10g119600
Chr10	17524779	C>T	Missense	OsKitaake10g119600
Chr10	17524786	C>T	Missense	OsKitaake10g119600
Chr10	17852882	A>G	Missense	OsKitaake10g123700
Chr10	17916697	G>T	Missense	OsKitaake10g125300
Chr10	17916707	A>G	Missense	OsKitaake10g125300
Chr10	17916884	C>A	Missense	OsKitaake10g125300
Chr10	17916902	C>A	Missense	OsKitaake10g125300
Chr10	17916910	C>A	Missense	OsKitaake10g125300
Chr10	18123091	G>A	Missense	OsKitaake10g128200
Chr10	18183631	C>G	Missense	OsKitaake10g128500
Chr10	18291489	C>A	Missense	OsKitaake10g129200
Chr10	18697273	A>T	Missense	OsKitaake10g133000
Chr10	18727832	G>C	Missense	OsKitaake10g133500
Chr10	18832172	T>G	Missense	OsKitaake10g134100
Chr10	19603866	G>C	Missense	OsKitaake10g144400
Chr10	19624218	T>A	Missense	OsKitaake10g144900
Chr10	19771851	C>G	Missense	OsKitaake10g147000
Chr10	19780063	G>C	Missense	OsKitaake10g147200
Chr10	19794885	A>G	Missense	OsKitaake10g147400
Chr10	19800251	T>C	Missense	OsKitaake10g147500
Chr10	19806331	G>C	Missense	OsKitaake10g147600
Chr10	19835921	C>G	Missense	OsKitaake10g147900
Chr10	19837009	T>G	Missense	OsKitaake10g147900
Chr10	19856057	G>T	Missense	OsKitaake10g148400
Chr10	19867822	C>T	Missense	OsKitaake10g148600
Chr10	19874243	C>G	Missense	OsKitaake10g148700
Chr10	19875763	A>C	Missense	OsKitaake10g148800
Chr10	19884430	A>G	Missense	OsKitaake10g148900
Chr10	19887188	T>C	Missense	OsKitaake10g149000
Chr10	19887338	C>T	Missense	OsKitaake10g149000
Chr10	19887749	C>G	Missense	OsKitaake10g149000
Chr10	19888345	T>G	Missense	OsKitaake10g149000
Chr10	19888346	T>G	Missense	OsKitaake10g149000
Chr10	19966367	C>T	Missense	OsKitaake10g150200
Chr10	20000259	T>G	Missense	OsKitaake10g150800
Chr10	20013895	A>C	Missense	OsKitaake10g151100
Chr10	20051613	G>T	Missense	OsKitaake10g151600
Chr10	20053829	T>G	Missense	OsKitaake10g151600
Chr10	20146361	A>G	Stop lost	OsKitaake10g152700
Chr10	20186296	A>C	Missense	OsKitaake10g153500
Chr10	20287187	C>T	Missense	OsKitaake10g154200
Chr10	20707337	G>C	Missense	OsKitaake10g159300
Chr10	21086789	G>A	Missense	OsKitaake10g163600
Chr10	21729327	G>A	Missense	OsKitaake10g174100
Chr10	22028515	C>T	Missense	OsKitaake10g178400
Chr10	22046085	C>G	Missense	OsKitaake10g178600
Chr10	22056081	G>T	Stop lost	OsKitaake10g178700
Chr10	22248472	C>T	Missense	OsKitaake10g181700
Chr10	22268621	A>C	Missense	OsKitaake10g182100
Chr10	22329394	A>G	Start lost	OsKitaake10g183000
Chr10	22436710	G>C	Missense	OsKitaake10g184500
Chr10	22436711	C>G	Missense	OsKitaake10g184500
Chr10	22576123	G>C	Missense	OsKitaake10g186600
Chr10	22576124	C>G	Missense	OsKitaake10g186600
Chr10	22940536	T>A	Missense	OsKitaake10g192000
Chr10	22980925	G>A	Missense	OsKitaake10g192500
Chr10	23116066	C>T	Missense	OsKitaake10g194900
Chr10	23151869	C>T	Missense	OsKitaake10g195250
Chr10	23189394	T>G	Missense	OsKitaake10g195600
Chr11	21380	T>G	Missense	OsKitaake11g000048
Chr11	21608	A>G	Missense	OsKitaake11g000048
Chr11	21979	G>C	Missense	OsKitaake11g000048
Chr11	23006	T>C	Missense	OsKitaake11g000048
Chr11	97608	C>A	Missense	OsKitaake11g000208
Chr11	97612	G>C	Missense	OsKitaake11g000208
Chr11	97616	C>T	Missense	OsKitaake11g000208
Chr11	97630	C>G	Missense	OsKitaake11g000208
Chr11	97634	T>A	Missense	OsKitaake11g000208
Chr11	530658	A>C	Missense	OsKitaake11g006000
Chr11	567505	A>G	Missense	OsKitaake11g006800
Chr11	961973	G>A	Missense	OsKitaake11g012100
Chr11	1026689	G>A	Missense	OsKitaake11g012800
Chr11	1227133	T>C	Missense	OsKitaake11g014700
Chr11	1278778	C>T	Missense	OsKitaake11g015600
Chr11	1312041	G>A	Missense	OsKitaake11g016100
Chr11	1312140	A>G	Missense	OsKitaake11g016100
Chr11	1457826	T>C	Stop lost	OsKitaake11g019100
Chr11	1469961	C>T	Missense	OsKitaake11g019300
Chr11	1485857	A>C	Missense	OsKitaake11g019500
Chr11	1487312	C>T	Missense	OsKitaake11g019500
Chr11	1494698	T>C	Missense	OsKitaake11g019700
Chr11	1500495	T>C	Missense	OsKitaake11g019800
Chr11	1503409	T>C	Missense	OsKitaake11g019900
Chr11	1519260	T>C	Missense	OsKitaake11g020200
Chr11	1519302	C>G	Missense	OsKitaake11g020200
Chr11	1531720	T>G	Missense	OsKitaake11g020200
Chr11	1550522	G>A	Splice donor	OsKitaake11g020300
Chr11	1554791	G>A	Splice donor	OsKitaake11g020500
Chr11	1616817	C>G	Missense	OsKitaake11g021200
Chr11	1620302	G>A	Missense	OsKitaake11g021200
Chr11	1689488	G>C	Missense	OsKitaake11g022400
Chr11	1744649	A>C	Missense	OsKitaake11g023500
Chr11	1806356	G>A	Splice acceptor	OsKitaake11g025100
Chr11	1896615	A>G	Missense	OsKitaake11g026800
Chr11	1931169	T>C	Missense	OsKitaake11g027000
Chr11	2933931	C>G	Missense	OsKitaake11g041500
Chr11	2948140	A>G	Missense	OsKitaake11g041700
Chr11	3191704	G>A	Missense	OsKitaake11g044300
Chr11	3348051	A>C	Missense	OsKitaake11g046400
Chr11	3489117	C>T	Missense	OsKitaake11g048300
Chr11	3491861	C>G	Missense	OsKitaake11g048300
Chr11	3629170	C>A	Missense	OsKitaake11g050200
Chr11	3642796	C>A	Missense	OsKitaake11g050400
Chr11	3683170	C>G	Missense	OsKitaake11g051200
Chr11	3697768	T>C	Missense	OsKitaake11g051300
Chr11	4605849	C>T	Stop gained	OsKitaake11g060600
Chr11	4674075	G>A	Missense	OsKitaake11g061100
Chr11	4676383	A>G	Missense	OsKitaake11g061200
Chr11	4879244	A>G	Missense	OsKitaake11g062500
Chr11	4879500	T>C	Missense	OsKitaake11g062500
Chr11	4879556	C>T	Missense	OsKitaake11g062500
Chr11	4884187	G>T	Missense	OsKitaake11g062600
Chr11	4884885	G>T	Missense	OsKitaake11g062600
Chr11	4943238	G>A	Missense	OsKitaake11g063000
Chr11	4943804	A>G	Missense	OsKitaake11g063000
Chr11	4949054	G>A	Missense	OsKitaake11g063100
Chr11	4979879	G>A	Missense	OsKitaake11g063400
Chr11	4982588	C>T	Missense	OsKitaake11g063500
Chr11	4983195	C>T	Missense	OsKitaake11g063500
Chr11	4986843	C>A	Missense	OsKitaake11g063500
Chr11	5011048	T>C	Missense	OsKitaake11g063600
Chr11	5011050	A>G	Missense	OsKitaake11g063600
Chr11	5011081	T>C	Missense	OsKitaake11g063600
Chr11	5011914	A>G	Missense	OsKitaake11g063600
Chr11	5011980	G>A	Missense	OsKitaake11g063600
Chr11	5012546	G>T	Missense	OsKitaake11g063600
Chr11	5013593	A>G	Missense	OsKitaake11g063600
Chr11	5015653	G>C	Missense	OsKitaake11g063700
Chr11	5015749	T>C	Missense	OsKitaake11g063700
Chr11	5015794	C>G	Missense	OsKitaake11g063700
Chr11	5015821	G>C	Missense	OsKitaake11g063700
Chr11	5016005	C>T	Missense	OsKitaake11g063700
Chr11	5046663	C>T	Missense	OsKitaake11g064000
Chr11	5047182	G>C	Missense	OsKitaake11g064000
Chr11	5047240	A>C	Missense	OsKitaake11g064000
Chr11	5047401	G>T	Missense	OsKitaake11g064000
Chr11	5048084	G>C	Missense	OsKitaake11g064000
Chr11	5048211	C>T	Missense	OsKitaake11g064000
Chr11	5049518	G>T	Missense	OsKitaake11g064000
Chr11	5049523	T>C	Missense	OsKitaake11g064000
Chr11	5049539	G>C	Missense	OsKitaake11g064000
Chr11	5076328	C>T	Missense	OsKitaake11g064300
Chr11	5076330	T>C	Missense	OsKitaake11g064300
Chr11	5076331	G>T	Missense	OsKitaake11g064300
Chr11	5076393	C>G	Missense	OsKitaake11g064300
Chr11	5076444	T>A	Missense	OsKitaake11g064300
Chr11	5076495	G>C	Missense	OsKitaake11g064300
Chr11	5076641	C>T	Missense	OsKitaake11g064300
Chr11	5076670	T>C	Missense	OsKitaake11g064300
Chr11	5076686	G>C	Missense	OsKitaake11g064300
Chr11	5076708	T>C	Missense	OsKitaake11g064300
Chr11	5076747	T>G	Missense	OsKitaake11g064300
Chr11	5114152	G>T	Splice acceptor	OsKitaake11g064366
Chr11	5114153	C>T	Missense	OsKitaake11g064366
Chr11	5114224	A>T	Missense	OsKitaake11g064366
Chr11	5114551	G>A	Missense	OsKitaake11g064366
Chr11	5114699	T>C	Missense	OsKitaake11g064366
Chr11	5114807	C>T	Missense	OsKitaake11g064366
Chr11	5114846	T>G	Missense	OsKitaake11g064366
Chr11	5114888	A>G	Missense	OsKitaake11g064366
Chr11	5114919	G>T	Missense	OsKitaake11g064366
Chr11	5114998	T>C	Missense	OsKitaake11g064366
Chr11	5115057	A>G	Missense	OsKitaake11g064366
Chr11	5115062	G>T	Missense	OsKitaake11g064366
Chr11	5115067	C>T	Missense	OsKitaake11g064366
Chr11	5115397	A>G	Missense	OsKitaake11g064366
Chr11	5119783	T>G	Missense	OsKitaake11g064500
Chr11	5119822	A>G	Missense	OsKitaake11g064500
Chr11	5119881	C>A	Missense	OsKitaake11g064500
Chr11	5119896	A>G	Missense	OsKitaake11g064500
Chr11	5119900	T>C	Missense	OsKitaake11g064500
Chr11	5119902	A>G	Missense	OsKitaake11g064500
Chr11	5119993	G>T	Missense	OsKitaake11g064500
Chr11	5120010	T>A	Stop lost	OsKitaake11g064500
Chr11	5120951	C>A	Splice acceptor	OsKitaake11g064600
Chr11	5121402	C>T	Missense	OsKitaake11g064600
Chr11	5121412	C>T	Missense	OsKitaake11g064600
Chr11	5121442	G>A	Missense	OsKitaake11g064600
Chr11	5121460	G>C	Missense	OsKitaake11g064600
Chr11	5121465	A>C	Missense	OsKitaake11g064600
Chr11	5121475	A>G	Missense	OsKitaake11g064600
Chr11	5121488	A>C	Missense	OsKitaake11g064600
Chr11	5121564	T>C	Missense	OsKitaake11g064600
Chr11	5121624	C>T	Missense	OsKitaake11g064600
Chr11	5121706	C>A	Missense	OsKitaake11g064600
Chr11	5121709	T>C	Missense	OsKitaake11g064600
Chr11	5121757	A>G	Missense	OsKitaake11g064600
Chr11	5122062	T>A	Missense	OsKitaake11g064600
Chr11	5122243	G>A	Missense	OsKitaake11g064600
Chr11	5122317	C>T	Missense	OsKitaake11g064600
Chr11	5122407	C>T	Splice acceptor	OsKitaake11g064600
Chr11	5140821	T>A	Missense	OsKitaake11g064700
Chr11	5140827	G>A	Missense	OsKitaake11g064700
Chr11	5140837	A>G	Missense	OsKitaake11g064700
Chr11	5140863	G>T	Missense	OsKitaake11g064700
[truncated: 8,424 more rows]

## Sheet: InDel-genes
Additional file 4. Comparative genomic analysis between KitaakeX and Nipponbare
Chromosome	Position	Size (bp)	Variation Type	Effect	Gene ID
Chr1	223320	6	Deletion	Inframe deletion	OsKitaake01g003100
Chr1	871641	3	Insertion	Frameshift	OsKitaake01g009500
Chr1	1083071	5	Deletion	Splice acceptor	OsKitaake01g012700
Chr1	1394023	3	Insertion	Frameshift	OsKitaake01g016800
Chr1	1399286	3	Deletion	Inframe deletion	OsKitaake01g017000
Chr1	1428515	3	Deletion	Inframe deletion	OsKitaake01g017600
Chr1	1428940	3	Insertion	Frameshift	OsKitaake01g017600
Chr1	1428997	41	Deletion	Frameshift	OsKitaake01g017600
Chr1	1432637	9	Deletion	Inframe deletion	OsKitaake01g017700
Chr1	1432676	5	Deletion	Frameshift	OsKitaake01g017700
Chr1	1432684	1	Deletion	Frameshift	OsKitaake01g017700
Chr1	1432754	1	Deletion	Frameshift	OsKitaake01g017700
Chr1	1432756	1	Deletion	Frameshift	OsKitaake01g017700
Chr1	1432758	1	Deletion	Frameshift	OsKitaake01g017700
Chr1	1432763	3	Deletion	Inframe deletion	OsKitaake01g017700
Chr1	1548797	1	Insertion	Frameshift	OsKitaake01g018700
Chr1	1548800	1	Deletion	Frameshift	OsKitaake01g018700
Chr1	1548912	1	Insertion	Frameshift	OsKitaake01g018700
Chr1	1548913	2	Insertion	Frameshift	OsKitaake01g018700
Chr1	1553557	3	Insertion	Frameshift	OsKitaake01g018800
Chr1	1556217	1	Insertion	Frameshift	OsKitaake01g018800
Chr1	1556223	1	Deletion	Frameshift	OsKitaake01g018800
Chr1	1570207	10	Insertion	Frameshift	OsKitaake01g019200
Chr1	1570585	3	Insertion	Frameshift	OsKitaake01g019200
Chr1	1572236	5	Deletion	Frameshift	OsKitaake01g019300
Chr1	1572320	6	Deletion	Inframe deletion	OsKitaake01g019300
Chr1	1572540	15	Deletion	Inframe deletion	OsKitaake01g019300
Chr1	1572560	6	Deletion	Inframe deletion	OsKitaake01g019300
Chr1	1575129	6	Deletion	Inframe deletion	OsKitaake01g019400
Chr1	1575211	12	Insertion	Frameshift	OsKitaake01g019400
Chr1	1575227	3	Insertion	Frameshift	OsKitaake01g019400
Chr1	1578140	6	Deletion	Inframe deletion	OsKitaake01g019400
Chr1	2213818	3	Deletion	Inframe deletion	OsKitaake01g027800
Chr1	2268694	12	Insertion	Frameshift	OsKitaake01g028100
Chr1	2294431	9	Insertion	Frameshift	OsKitaake01g028300
Chr1	2301371	3	Insertion	Frameshift	OsKitaake01g028400
Chr1	2301378	2	Insertion	Frameshift	OsKitaake01g028400
Chr1	2301380	1	Insertion	Frameshift	OsKitaake01g028400
Chr1	2301567	3	Deletion	Inframe deletion	OsKitaake01g028400
Chr1	2301599	2	Insertion	Splice donor	OsKitaake01g028400
Chr1	2421527	6	Deletion	Inframe deletion	OsKitaake01g030100
Chr1	2429763	3	Insertion	Frameshift	OsKitaake01g030400
Chr1	2458018	3	Insertion	Frameshift	OsKitaake01g031100
Chr1	2466978	11	Insertion	Splice acceptor	OsKitaake01g031300
Chr1	2466980	2	Insertion	Splice acceptor	OsKitaake01g031300
Chr1	2467700	1	Insertion	Frameshift	OsKitaake01g031400
Chr1	2491318	3	Insertion	Splice acceptor	OsKitaake01g031700
Chr1	2533306	1	Insertion	Frameshift	OsKitaake01g032200
Chr1	2566622	6	Deletion	Inframe deletion	OsKitaake01g032400
Chr1	2572289	3	Insertion	Frameshift	OsKitaake01g032500
Chr1	2572382	12	Deletion	Inframe deletion	OsKitaake01g032500
Chr1	2576977	3	Deletion	Inframe deletion	OsKitaake01g032600
Chr1	2577047	14	Insertion	Frameshift	OsKitaake01g032600
Chr1	2577048	3	Insertion	Frameshift	OsKitaake01g032600
Chr1	2577051	1	Insertion	Frameshift	OsKitaake01g032600
Chr1	2577052	6	Insertion	Frameshift	OsKitaake01g032600
Chr1	2577054	1	Insertion	Frameshift	OsKitaake01g032600
Chr1	2577058	2	Insertion	Frameshift	OsKitaake01g032600
Chr1	2577060	5	Insertion	Frameshift	OsKitaake01g032600
Chr1	2577063	4	Insertion	Frameshift	OsKitaake01g032600
Chr1	2577068	1	Insertion	Frameshift	OsKitaake01g032600
Chr1	2577069	2	Insertion	Frameshift	OsKitaake01g032600
Chr1	2582994	30	Insertion	Frameshift	OsKitaake01g032800
Chr1	2582995	3	Insertion	Frameshift	OsKitaake01g032800
Chr1	2584217	9	Insertion	Frameshift	OsKitaake01g032800
Chr1	2594681	3	Deletion	Inframe deletion	OsKitaake01g032900
Chr1	2657126	3	Deletion	Inframe deletion	OsKitaake01g033600
Chr1	2696471	43	Deletion	Splice donor	OsKitaake01g033608
Chr1	2721932	1	Insertion	Frameshift	OsKitaake01g034116
Chr1	2721994	1	Insertion	Frameshift	OsKitaake01g034116
Chr1	2722068	1	Deletion	Frameshift	OsKitaake01g034116
Chr1	2722224	3	Insertion	Frameshift	OsKitaake01g034116
Chr1	2722385	3	Deletion	Inframe deletion	OsKitaake01g034116
Chr1	2759591	3	Insertion	Frameshift	OsKitaake01g034900
Chr1	2768838	3	Insertion	Frameshift	OsKitaake01g034908
Chr1	2794349	8	Deletion	Frameshift	OsKitaake01g035200
Chr1	2802643	3	Deletion	Inframe deletion	OsKitaake01g035400
Chr1	2833912	3	Deletion	Inframe deletion	OsKitaake01g035900
Chr1	2838871	1	Deletion	Frameshift	OsKitaake01g035908
Chr1	2838940	2	Deletion	Frameshift	OsKitaake01g035908
Chr1	2838949	1	Deletion	Frameshift	OsKitaake01g035908
Chr1	2838955	1	Insertion	Frameshift	OsKitaake01g035908
Chr1	2839100	40	Deletion	Frameshift	OsKitaake01g035908
Chr1	2840613	15	Insertion	Frameshift	OsKitaake01g036000
Chr1	2845077	12	Deletion	Inframe deletion	OsKitaake01g036100
Chr1	2848440	6	Deletion	Inframe deletion	OsKitaake01g036200
Chr1	2848465	1	Insertion	Frameshift	OsKitaake01g036200
Chr1	2848484	8	Deletion	Frameshift	OsKitaake01g036200
Chr1	2848733	3	Deletion	Inframe deletion	OsKitaake01g036200
Chr1	2848969	1	Deletion	Frameshift	OsKitaake01g036200
Chr1	2848974	1	Deletion	Frameshift	OsKitaake01g036200
Chr1	2849102	12	Deletion	Inframe deletion	OsKitaake01g036200
Chr1	2934798	4	Deletion	Frameshift	OsKitaake01g037608
Chr1	2936180	1	Deletion	Frameshift	OsKitaake01g037608
Chr1	2936744	8	Insertion	Frameshift	OsKitaake01g037616
Chr1	2936835	14	Insertion	Frameshift	OsKitaake01g037616
Chr1	2937015	9	Insertion	Frameshift	OsKitaake01g037616
Chr1	2943331	4	Deletion	Frameshift	OsKitaake01g037640
Chr1	3073635	1	Insertion	Frameshift	OsKitaake01g038800
Chr1	3073637	2	Insertion	Frameshift	OsKitaake01g038800
Chr1	3073939	6	Deletion	Inframe deletion	OsKitaake01g038800
Chr1	3073947	1	Deletion	Frameshift	OsKitaake01g038800
Chr1	3073952	1	Deletion	Frameshift	OsKitaake01g038800
Chr1	3073954	1	Deletion	Frameshift	OsKitaake01g038800
Chr1	3074069	1	Deletion	Frameshift	OsKitaake01g038800
Chr1	3074072	1	Insertion	Frameshift	OsKitaake01g038800
Chr1	3085249	6	Insertion	Frameshift	OsKitaake01g039100
Chr1	3119851	5	Deletion	Frameshift	OsKitaake01g040500
Chr1	3119857	1	Deletion	Frameshift	OsKitaake01g040500
Chr1	3127520	2	Deletion	Frameshift	OsKitaake01g040700
Chr1	3143738	1	Deletion	Frameshift	OsKitaake01g041200
Chr1	3143742	1	Insertion	Frameshift	OsKitaake01g041200
Chr1	3144377	1	Deletion	Frameshift	OsKitaake01g041200
Chr1	3144380	1	Insertion	Frameshift	OsKitaake01g041200
Chr1	3144603	1	Deletion	Frameshift	OsKitaake01g041200
Chr1	3144607	1	Insertion	Frameshift	OsKitaake01g041200
Chr1	3145537	1	Deletion	Frameshift	OsKitaake01g041200
Chr1	3145539	2	Deletion	Frameshift	OsKitaake01g041200
Chr1	3197652	4	Deletion	Frameshift	OsKitaake01g041700
Chr1	3273452	1	Insertion	Frameshift	OsKitaake01g042900
Chr1	3275095	1	Insertion	Frameshift	OsKitaake01g042900
Chr1	3275099	1	Deletion	Frameshift	OsKitaake01g042900
Chr1	3275631	3	Deletion	Inframe deletion	OsKitaake01g042900
Chr1	3275685	1	Deletion	Frameshift	OsKitaake01g042900
Chr1	3275693	1	Insertion	Frameshift	OsKitaake01g042900
Chr1	3302501	1	Insertion	Frameshift	OsKitaake01g043200
Chr1	3302504	1	Insertion	Frameshift	OsKitaake01g043200
Chr1	3302507	1	Insertion	Frameshift	OsKitaake01g043200
Chr1	3318063	3	Deletion	Inframe deletion	OsKitaake01g043300
Chr1	3318351	2	Insertion	Frameshift	OsKitaake01g043300
Chr1	3318356	2	Deletion	Frameshift	OsKitaake01g043300
Chr1	3318431	1	Deletion	Frameshift	OsKitaake01g043300
Chr1	3318884	2	Deletion	Frameshift	OsKitaake01g043300
Chr1	3318887	1	Deletion	Frameshift	OsKitaake01g043300
Chr1	3318980	3	Deletion	Inframe deletion	OsKitaake01g043300
Chr1	3322242	1	Deletion	Frameshift	OsKitaake01g043300
Chr1	3322245	1	Insertion	Frameshift	OsKitaake01g043300
Chr1	3323364	3	Deletion	Inframe deletion	OsKitaake01g043300
Chr1	3323420	1	Insertion	Frameshift	OsKitaake01g043300
Chr1	3323426	1	Deletion	Frameshift	OsKitaake01g043300
Chr1	3323545	1	Insertion	Frameshift	OsKitaake01g043300
Chr1	3323721	1	Deletion	Frameshift	OsKitaake01g043300
Chr1	3324033	2	Insertion	Splice acceptor	OsKitaake01g043400
Chr1	3332679	1	Insertion	Frameshift	OsKitaake01g043500
Chr1	3332688	2	Insertion	Frameshift	OsKitaake01g043500
Chr1	3332876	2	Insertion	Frameshift	OsKitaake01g043500
Chr1	3346072	3	Deletion	Inframe deletion	OsKitaake01g043700
Chr1	3346129	7	Insertion	Frameshift	OsKitaake01g043700
Chr1	3346130	1	Insertion	Frameshift	OsKitaake01g043700
Chr1	3347518	3	Deletion	Inframe deletion	OsKitaake01g043800
Chr1	3349709	8	Insertion	Frameshift	OsKitaake01g043900
Chr1	3359510	18	Deletion	Inframe deletion	OsKitaake01g044200
Chr1	3373650	21	Deletion	Inframe deletion	OsKitaake01g044500
Chr1	3376031	3	Deletion	Inframe deletion	OsKitaake01g044600
Chr1	3378609	3	Deletion	Inframe deletion	OsKitaake01g044700
Chr1	3384525	6	Insertion	Frameshift	OsKitaake01g044900
Chr1	3415202	3	Deletion	Inframe deletion	OsKitaake01g045300
Chr1	4681219	3	Insertion	Frameshift	OsKitaake01g062700
Chr1	4744434	9	Deletion	Inframe deletion	OsKitaake01g063208
Chr1	4825876	1	Insertion	Frameshift	OsKitaake01g064400
Chr1	4862472	9	Insertion	Frameshift	OsKitaake01g065000
Chr1	4970431	3	Insertion	Frameshift	OsKitaake01g066116
Chr1	5051119	1	Insertion	Frameshift	OsKitaake01g066400
Chr1	5051357	6	Deletion	Inframe deletion	OsKitaake01g066400
Chr1	5731335	1	Insertion	Frameshift	OsKitaake01g072800
Chr1	5731365	1	Insertion	Frameshift	OsKitaake01g072800
Chr1	5731368	1	Insertion	Frameshift	OsKitaake01g072800
Chr1	6504317	1	Insertion	Frameshift	OsKitaake01g082200
Chr1	6938861	3	Deletion	Inframe deletion	OsKitaake01g087300
Chr1	7006917	15	Deletion	Inframe deletion	OsKitaake01g087908
Chr1	7006943	1	Deletion	Frameshift	OsKitaake01g087908
Chr1	7096539	3	Deletion	Frameshift	OsKitaake01g088800
Chr1	7174416	3	Deletion	Inframe deletion	OsKitaake01g089500
Chr1	7184514	21	Insertion	Frameshift	OsKitaake01g089700
Chr1	7217295	1	Deletion	Frameshift	OsKitaake01g090300
Chr1	8923150	2	Insertion	Frameshift	OsKitaake01g111500
Chr1	8949470	11	Deletion	Frameshift	OsKitaake01g111808
Chr1	8949525	6	Deletion	Inframe deletion	OsKitaake01g111808
Chr1	8959347	11	Deletion	Frameshift	OsKitaake01g112008
Chr1	9069474	12	Insertion	Frameshift	OsKitaake01g116700
Chr1	9076181	3	Deletion	Inframe deletion	OsKitaake01g116800
Chr1	9439762	2	Insertion	Frameshift	OsKitaake01g121000
Chr1	9439784	2	Deletion	Frameshift	OsKitaake01g121000
Chr1	9928999	13	Deletion	Frameshift	OsKitaake01g125900
Chr1	9929361	9	Deletion	Inframe deletion	OsKitaake01g125900
Chr1	10496279	3	Insertion	Frameshift	OsKitaake01g131150
Chr1	10496495	13	Insertion	Frameshift	OsKitaake01g131150
Chr1	10496605	4	Insertion	Frameshift	OsKitaake01g131150
Chr1	10643912	3	Deletion	Inframe deletion	OsKitaake01g132100
Chr1	10943597	22	Insertion	Frameshift	OsKitaake01g134601
Chr1	11522449	3	Insertion	Frameshift	OsKitaake01g140000
Chr1	11675557	1	Insertion	Frameshift	OsKitaake01g140800
Chr1	11675565	1	Insertion	Frameshift	OsKitaake01g140800
Chr1	11675579	1	Insertion	Frameshift	OsKitaake01g140800
Chr1	11675605	1	Insertion	Frameshift	OsKitaake01g140800
Chr1	12273065	1	Insertion	Frameshift	OsKitaake01g148900
Chr1	14683027	15	Insertion	Frameshift	OsKitaake01g166200
Chr1	15999487	1	Insertion	Frameshift	OsKitaake01g173400
Chr1	18828532	2	Insertion	Frameshift	OsKitaake01g189300
Chr1	18875600	4	Insertion	Frameshift	OsKitaake01g189600
Chr1	20853283	1	Deletion	Frameshift	OsKitaake01g204300
Chr1	22633854	1	Deletion	Frameshift	OsKitaake01g216600
Chr1	23178667	1	Insertion	Frameshift	OsKitaake01g221100
Chr1	23870984	12	Deletion	Inframe deletion	OsKitaake01g229100
Chr1	23902994	1	Insertion	Frameshift	OsKitaake01g229600
Chr1	23903003	1	Insertion	Frameshift	OsKitaake01g229600
Chr1	23903004	1	Insertion	Frameshift	OsKitaake01g229600
Chr1	23903030	3	Deletion	Inframe deletion	OsKitaake01g229600
Chr1	23904439	3	Deletion	Inframe deletion	OsKitaake01g229600
Chr1	23904476	3	Deletion	Inframe deletion	OsKitaake01g229600
Chr1	23919656	6	Deletion	Inframe deletion	OsKitaake01g229700
Chr1	23923557	6	Insertion	Frameshift	OsKitaake01g229800
Chr1	23927417	6	Insertion	Frameshift	OsKitaake01g229900
Chr1	23931017	3	Insertion	Frameshift	OsKitaake01g230000
Chr1	23931207	1	Deletion	Frameshift	OsKitaake01g230000
Chr1	23931210	2	Deletion	Frameshift	OsKitaake01g230000
Chr1	23931224	2	Deletion	Frameshift	OsKitaake01g230000
Chr1	23931231	1	Deletion	Frameshift	OsKitaake01g230000
Chr1	24029827	32	Deletion	Frameshift	OsKitaake01g231000
Chr1	24067889	3	Insertion	Frameshift	OsKitaake01g231300
Chr1	24160332	6	Insertion	Frameshift	OsKitaake01g232300
Chr1	24160341	3	Insertion	Frameshift	OsKitaake01g232300
Chr1	24184501	9	Deletion	Start lost	OsKitaake01g232600
Chr1	24187970	3	Deletion	Inframe deletion	OsKitaake01g232700
Chr1	24204259	13	Deletion	Frameshift	OsKitaake01g232900
Chr1	24204379	1	Deletion	Frameshift	OsKitaake01g232900
Chr1	24204643	2	Insertion	Frameshift	OsKitaake01g233000
Chr1	24217378	1	Insertion	Frameshift	OsKitaake01g233200
Chr1	24366170	15	Insertion	Frameshift	OsKitaake01g234600
Chr1	24460537	12	Insertion	Frameshift	OsKitaake01g235132
Chr1	24603809	6	Deletion	Inframe deletion	OsKitaake01g237700
Chr1	25786337	1	Deletion	Frameshift	OsKitaake01g250666
Chr1	26831615	1	Insertion	Frameshift	OsKitaake01g260850
Chr1	28673421	1	Deletion	Frameshift	OsKitaake01g278200
Chr1	28727568	3	Deletion	Inframe deletion	OsKitaake01g278800
Chr1	29148271	3	Insertion	Frameshift	OsKitaake01g283500
Chr1	29447897	1	Insertion	Frameshift	OsKitaake01g288100
Chr1	30273609	1	Insertion	Frameshift	OsKitaake01g298300
Chr1	31028241	18	Deletion	Inframe deletion	OsKitaake01g309050
Chr1	31061337	3	Insertion	Frameshift	OsKitaake01g309700
Chr1	31895373	5	Insertion	Frameshift	OsKitaake01g321550
Chr1	33006737	3	Deletion	Inframe deletion	OsKitaake01g336600
Chr1	33590776	1	Deletion	Frameshift	OsKitaake01g344301
Chr1	34412208	1	Insertion	Frameshift	OsKitaake01g358000
Chr1	35340168	3	Insertion	Frameshift	OsKitaake01g372700
Chr1	35391335	1	Insertion	Frameshift	OsKitaake01g373250
Chr1	35511847	1	Insertion	Frameshift	OsKitaake01g375450
Chr1	36158268	3	Deletion	Inframe deletion	OsKitaake01g383901
Chr1	36158552	8	Deletion	Frameshift	OsKitaake01g383901
Chr1	39070958	6	Deletion	Inframe deletion	OsKitaake01g419500
Chr1	39357092	3	Insertion	Frameshift	OsKitaake01g424300
Chr1	39437915	1	Insertion	Frameshift	OsKitaake01g425200
Chr1	39953681	6	Insertion	Frameshift	OsKitaake01g432300
Chr1	40960415	6	Deletion	Inframe deletion	OsKitaake01g446800
Chr1	41389815	1	Deletion	Frameshift	OsKitaake01g452100
Chr1	41389972	1	Insertion	Frameshift	OsKitaake01g452100
Chr1	41542072	1	Deletion	Frameshift	OsKitaake01g453700
Chr1	42602822	2	Insertion	Frameshift	OsKitaake01g469100
Chr1	42948121	15	Deletion	Inframe deletion	OsKitaake01g473400
Chr1	43058654	3	Deletion	Inframe deletion	OsKitaake01g475100
Chr1	43537499	3	Deletion	Inframe deletion	OsKitaake01g483000
Chr1	43590511	27	Deletion	Inframe deletion	OsKitaake01g483900
Chr1	43590541	21	Deletion	Inframe deletion	OsKitaake01g483900
Chr1	43590564	1	Deletion	Frameshift	OsKitaake01g483900
Chr1	43591215	1	Deletion	Frameshift	OsKitaake01g483900
Chr1	43999632	15	Insertion	Frameshift	OsKitaake01g490500
Chr1	44017578	6	Deletion	Inframe deletion	OsKitaake01g490800
Chr10	413645	3	Deletion	Inframe deletion	OsKitaake10g002800
Chr10	413652	1	Insertion	Frameshift	OsKitaake10g002800
Chr10	413660	2	Insertion	Frameshift	OsKitaake10g002800
Chr10	1577218	1	Insertion	Frameshift	OsKitaake10g010801
Chr10	1749243	3	Insertion	Frameshift	OsKitaake10g012600
Chr10	1749282	12	Insertion	Frameshift	OsKitaake10g012600
Chr10	1869570	3	Deletion	Inframe deletion	OsKitaake10g014400
Chr10	1926858	3	Deletion	Inframe deletion	OsKitaake10g015150
Chr10	2131847	4	Insertion	Frameshift	OsKitaake10g016600
Chr10	2131848	2	Insertion	Frameshift	OsKitaake10g016600
Chr10	2160270	4	Deletion	Frameshift	OsKitaake10g016800
Chr10	2196361	1	Insertion	Frameshift	OsKitaake10g017200
Chr10	2211589	1	Deletion	Frameshift	OsKitaake10g017300
Chr10	2283133	1	Deletion	Frameshift	OsKitaake10g018500
Chr10	2283455	5	Insertion	Frameshift	OsKitaake10g018500
Chr10	2283462	1	Insertion	Frameshift	OsKitaake10g018500
Chr10	2283474	1	Insertion	Frameshift	OsKitaake10g018500
Chr10	2283480	2	Insertion	Frameshift	OsKitaake10g018500
Chr10	2290644	3	Deletion	Inframe deletion	OsKitaake10g018600
Chr10	2357289	9	Deletion	Inframe deletion	OsKitaake10g019300
Chr10	2451883	2	Deletion	Frameshift	OsKitaake10g019600
Chr10	2555748	7	Insertion	Frameshift	OsKitaake10g020100
Chr10	2562678	13	Deletion	Frameshift	OsKitaake10g020200
Chr10	2622003	51	Deletion	Inframe deletion	OsKitaake10g021100
Chr10	2633696	2	Insertion	Frameshift	OsKitaake10g021200
Chr10	2633997	1	Deletion	Frameshift	OsKitaake10g021200
Chr10	2634993	29	Insertion	Frameshift	OsKitaake10g021200
Chr10	2640107	1	Insertion	Frameshift	OsKitaake10g021250
Chr10	2675131	2	Insertion	Frameshift	OsKitaake10g021850
Chr10	2701486	3	Deletion	Start lost	OsKitaake10g022200
Chr10	2702244	1	Insertion	Frameshift	OsKitaake10g022200
Chr10	2702249	1	Deletion	Frameshift	OsKitaake10g022200
Chr10	2732361	38	Insertion	Frameshift	OsKitaake10g022500
Chr10	2732363	4	Insertion	Frameshift	OsKitaake10g022500
Chr10	2732366	3	Insertion	Frameshift	OsKitaake10g022500
Chr10	2732565	3	Insertion	Frameshift	OsKitaake10g022500
Chr10	2741828	4	Insertion	Start lost	OsKitaake10g022600
Chr10	2742498	2	Deletion	Frameshift	OsKitaake10g022600
Chr10	2742598	4	Insertion	Frameshift	OsKitaake10g022600
Chr10	2743416	2	Insertion	Frameshift	OsKitaake10g022600
Chr10	2796235	11	Insertion	Frameshift	OsKitaake10g022900
Chr10	4854186	2	Insertion	Frameshift	OsKitaake10g035000
Chr10	6038535	9	Insertion	Frameshift	OsKitaake10g041600
Chr10	8374713	1	Insertion	Frameshift	OsKitaake10g052600
Chr10	10888941	3	Insertion	Frameshift	OsKitaake10g064250
Chr10	10896079	4	Insertion	Frameshift	OsKitaake10g064300
Chr10	10951431	1	Insertion	Frameshift	OsKitaake10g064550
Chr10	11414135	1	Deletion	Frameshift	OsKitaake10g067695
Chr10	11570539	4	Insertion	Frameshift	OsKitaake10g165832
Chr10	11573454	4	Insertion	Frameshift	OsKitaake10g165834
Chr10	11588879	12	Insertion	Frameshift	OsKitaake10g069100
Chr10	12446518	2	Deletion	Splice acceptor	OsKitaake10g075000
Chr10	14897138	1	Insertion	Frameshift	OsKitaake10g092801
Chr10	15047018	1	Insertion	Frameshift	OsKitaake10g094400
Chr10	15497888	1	Deletion	Frameshift	OsKitaake10g100000
Chr10	15605347	1	Deletion	Frameshift	OsKitaake10g101200
Chr10	15605352	3	Deletion	Inframe deletion	OsKitaake10g101200
Chr10	15605364	1	Deletion	Frameshift	OsKitaake10g101200
Chr10	15605368	2	Deletion	Frameshift	OsKitaake10g101200
Chr10	15605382	2	Deletion	Frameshift	OsKitaake10g101200
Chr10	15605391	1	Deletion	Frameshift	OsKitaake10g101200
Chr10	15605395	3	Deletion	Inframe deletion	OsKitaake10g101200
Chr10	15605399	1	Deletion	Frameshift	OsKitaake10g101200
Chr10	15605421	1	Deletion	Frameshift	OsKitaake10g101200
Chr10	15605423	1	Deletion	Frameshift	OsKitaake10g101200
Chr10	15605440	1	Deletion	Frameshift	OsKitaake10g101200
Chr10	15605448	2	Deletion	Frameshift	OsKitaake10g101200
Chr10	15605453	1	Deletion	Frameshift	OsKitaake10g101200
Chr10	15605456	1	Deletion	Frameshift	OsKitaake10g101200
Chr10	15605463	1	Deletion	Frameshift	OsKitaake10g101200
Chr10	16085893	1	Insertion	Frameshift	OsKitaake10g106900
Chr10	16085932	1	Deletion	Frameshift	OsKitaake10g106900
Chr10	16563889	1	Insertion	Frameshift	OsKitaake10g112502
Chr10	17882513	1	Deletion	Frameshift	OsKitaake10g124600
Chr10	17913922	1	Insertion	Frameshift	OsKitaake10g125101
Chr10	17916891	1	Deletion	Frameshift	OsKitaake10g125300
Chr10	17916914	1	Insertion	Frameshift	OsKitaake10g125300
Chr10	17967211	3	Deletion	Inframe deletion	OsKitaake10g126300
Chr10	18017197	1	Deletion	Frameshift	OsKitaake10g127000
Chr10	18017234	1	Deletion	Frameshift	OsKitaake10g127000
Chr10	18017255	2	Deletion	Frameshift	OsKitaake10g127000
Chr10	18017266	1	Deletion	Frameshift	OsKitaake10g127000
Chr10	18778289	21	Deletion	Inframe deletion	OsKitaake10g133900
Chr10	18875555	1	Deletion	Frameshift	OsKitaake10g134400
Chr10	18903327	1	Deletion	Frameshift	OsKitaake10g134900
Chr10	18961680	1	Insertion	Frameshift	OsKitaake10g135300
Chr10	19009246	6	Insertion	Frameshift	OsKitaake10g135900
Chr10	19465018	1	Insertion	Frameshift	OsKitaake10g142600
Chr10	19774928	1	Deletion	Frameshift	OsKitaake10g147100
Chr10	19866023	3	Deletion	Frameshift	OsKitaake10g148500
Chr10	19887440	4	Insertion	Splice acceptor	OsKitaake10g149000
Chr10	20107784	32	Deletion	Splice donor	OsKitaake10g152200
Chr10	20224359	1	Deletion	Frameshift	OsKitaake10g153900
Chr10	20224370	3	Deletion	Inframe deletion	OsKitaake10g153900
Chr10	20286998	1	Insertion	Frameshift	OsKitaake10g154200
Chr10	20707335	1	Deletion	Frameshift	OsKitaake10g159300
Chr10	20707341	6	Deletion	Inframe deletion	OsKitaake10g159300
Chr10	20707362	1	Deletion	Frameshift	OsKitaake10g159300
Chr10	20707364	1	Deletion	Frameshift	OsKitaake10g159300
Chr10	20707392	1	Deletion	Frameshift	OsKitaake10g159300
Chr10	21012354	1	Deletion	Frameshift	OsKitaake10g162900
Chr10	21256707	1	Insertion	Frameshift	OsKitaake10g165603
Chr10	21259979	3	Insertion	Frameshift	OsKitaake10g166100
Chr10	21458620	2	Insertion	Frameshift	OsKitaake10g170400
Chr10	22045982	6	Deletion	Inframe deletion	OsKitaake10g178600
Chr10	22111792	24	Deletion	Inframe deletion	OsKitaake10g179300
Chr10	22248418	1	Insertion	Frameshift	OsKitaake10g181700
Chr10	22436593	2	Insertion	Frameshift	OsKitaake10g184500
Chr10	22436596	3	Deletion	Inframe deletion	OsKitaake10g184500
Chr10	22436641	1	Deletion	Frameshift	OsKitaake10g184500
Chr10	22436647	1	Deletion	Frameshift	OsKitaake10g184500
Chr10	22436680	1	Deletion	Frameshift	OsKitaake10g184500
Chr10	22436700	2	Deletion	Frameshift	OsKitaake10g184500
Chr10	22436705	1	Deletion	Frameshift	OsKitaake10g184500
Chr10	22436765	1	Insertion	Frameshift	OsKitaake10g184500
Chr10	22436773	1	Deletion	Frameshift	OsKitaake10g184500
Chr10	22436780	1	Deletion	Frameshift	OsKitaake10g184500
Chr10	22576111	1	Deletion	Frameshift	OsKitaake10g186600
Chr10	22576157	1	Deletion	Frameshift	OsKitaake10g186600
Chr10	23084069	5	Deletion	Frameshift	OsKitaake10g194250
Chr11	97606	1	Deletion	Frameshift	OsKitaake11g000208
Chr11	97610	1	Deletion	Frameshift	OsKitaake11g000208
Chr11	97617	1	Insertion	Frameshift	OsKitaake11g000208
Chr11	97622	2	Deletion	Frameshift	OsKitaake11g000208
Chr11	97629	1	Deletion	Frameshift	OsKitaake11g000208
Chr11	97632	1	Insertion	Frameshift	OsKitaake11g000208
Chr11	961408	6	Deletion	Inframe deletion	OsKitaake11g012100
Chr11	1067306	24	Deletion	Inframe deletion	OsKitaake11g013000
Chr11	1487496	1	Deletion	Frameshift	OsKitaake11g019500
Chr11	1672892	4	Insertion	Frameshift	OsKitaake11g022200
Chr11	1700905	1	Insertion	Frameshift	OsKitaake11g022600
Chr11	1714359	1	Insertion	Frameshift	OsKitaake11g022800
Chr11	1825191	1	Insertion	Splice acceptor	OsKitaake11g025400
Chr11	2003880	15	Deletion	Inframe deletion	OsKitaake11g028800
Chr11	2029641	33	Insertion	Frameshift	OsKitaake11g029500
Chr11	2060358	1	Deletion	Frameshift	OsKitaake11g030200
Chr11	2767506	2	Deletion	Splice donor	OsKitaake11g039000
Chr11	3102771	2	Insertion	Frameshift	OsKitaake11g043600
Chr11	3216814	3	Deletion	Inframe deletion	OsKitaake11g044400
Chr11	3278612	1	Insertion	Frameshift	OsKitaake11g045500
Chr11	3278752	3	Deletion	Inframe deletion	OsKitaake11g045500
Chr11	3352339	3	Insertion	Frameshift	OsKitaake11g046600
Chr11	3474630	1	Insertion	Frameshift	OsKitaake11g048050
Chr11	3474648	1	Insertion	Frameshift	OsKitaake11g048050
Chr11	4649294	1	Insertion	Frameshift	OsKitaake11g061001
Chr11	4884023	1	Deletion	Frameshift	OsKitaake11g062600
Chr11	4884374	2	Deletion	Frameshift	OsKitaake11g062600
Chr11	4884805	14	Insertion	Frameshift	OsKitaake11g062600
Chr11	4986851	6	Insertion	Frameshift	OsKitaake11g063500
Chr11	5048067	1	Insertion	Frameshift	OsKitaake11g064000
Chr11	5049517	2	Insertion	Frameshift	OsKitaake11g064000
Chr11	5049520	1	Insertion	Frameshift	OsKitaake11g064000
Chr11	5076338	3	Deletion	Inframe deletion	OsKitaake11g064300
Chr11	5076354	9	Deletion	Inframe deletion	OsKitaake11g064300
Chr11	5076457	3	Insertion	Frameshift	OsKitaake11g064300
Chr11	5076507	3	Deletion	Inframe deletion	OsKitaake11g064300
Chr11	5076718	9	Deletion	Inframe deletion	OsKitaake11g064300
Chr11	5076799	3	Deletion	Inframe deletion	OsKitaake11g064300
Chr11	5076963	9	Insertion	Frameshift	OsKitaake11g064300
Chr11	5114214	1	Insertion	Frameshift	OsKitaake11g064366
Chr11	5114706	4	Deletion	Frameshift	OsKitaake11g064366
Chr11	5114880	1	Insertion	Frameshift	OsKitaake11g064366
Chr11	5114934	1	Insertion	Frameshift	OsKitaake11g064366
Chr11	5115040	1	Deletion	Frameshift	OsKitaake11g064366
Chr11	5119771	1	Deletion	Frameshift	OsKitaake11g064500
Chr11	5120920	1	Deletion	Frameshift	OsKitaake11g064600
Chr11	5140641	3	Deletion	Inframe deletion	OsKitaake11g064700
Chr11	5164113	3	Deletion	Inframe deletion	OsKitaake11g065000
Chr11	5195513	3	Deletion	Inframe deletion	OsKitaake11g065301
Chr11	5195783	6	Deletion	Inframe deletion	OsKitaake11g065301
Chr11	5195910	15	Insertion	Frameshift	OsKitaake11g065301
Chr11	5207525	1	Deletion	Frameshift	OsKitaake11g065500
Chr11	5208162	1	Deletion	Frameshift	OsKitaake11g065500
Chr11	5346768	2	Insertion	Frameshift	OsKitaake11g066532
Chr11	5346868	3	Insertion	Frameshift	OsKitaake11g066532
Chr11	5871248	2	Deletion	Frameshift	OsKitaake11g071600
Chr11	6251194	1	Insertion	Frameshift	OsKitaake11g075000
Chr11	6330091	3	Insertion	Frameshift	OsKitaake11g075400
Chr11	6336364	2	Insertion	Frameshift	OsKitaake11g075500
Chr11	6336585	2	Insertion	Frameshift	OsKitaake11g075500
Chr11	6393496	1	Insertion	Frameshift	OsKitaake11g076000
Chr11	6429896	3	Deletion	Inframe deletion	OsKitaake11g076500
Chr11	6478631	1	Deletion	Frameshift	OsKitaake11g077000
Chr11	6478727	2	Insertion	Frameshift	OsKitaake11g077000
Chr11	6637621	3	Insertion	Frameshift	OsKitaake11g078800
Chr11	6641000	1	Deletion	Frameshift	OsKitaake11g078900
Chr11	6641162	28	Insertion	Frameshift	OsKitaake11g078900
Chr11	6642505	6	Deletion	Inframe deletion	OsKitaake11g078900
Chr11	6647818	43	Insertion	Frameshift	OsKitaake11g079000
Chr11	6647822	25	Insertion	Frameshift	OsKitaake11g079000
Chr11	6647824	4	Insertion	Frameshift	OsKitaake11g079000
Chr11	6648918	3	Deletion	Inframe deletion	OsKitaake11g079000
Chr11	6648924	15	Deletion	Inframe deletion	OsKitaake11g079000
Chr11	6648940	3	Deletion	Inframe deletion	OsKitaake11g079000
Chr11	6669049	3	Insertion	Frameshift	OsKitaake11g079100
Chr11	6669052	3	Insertion	Frameshift	OsKitaake11g079100
Chr11	6669690	3	Insertion	Frameshift	OsKitaake11g079100
Chr11	6669703	11	Insertion	Frameshift	OsKitaake11g079100
Chr11	6669704	1	Insertion	Frameshift	OsKitaake11g079100
Chr11	6669830	3	Insertion	Frameshift	OsKitaake11g079100
Chr11	6670954	1	Insertion	Frameshift	OsKitaake11g079200
Chr11	6670955	2	Insertion	Frameshift	OsKitaake11g079200
Chr11	6671300	1	Deletion	Frameshift	OsKitaake11g079200
Chr11	6671303	1	Insertion	Frameshift	OsKitaake11g079200
Chr11	6681810	2	Insertion	Frameshift	OsKitaake11g079400
Chr11	6681942	9	Insertion	Frameshift	OsKitaake11g079400
Chr11	6684370	9	Deletion	Inframe deletion	OsKitaake11g079400
Chr11	6684814	3	Insertion	Frameshift	OsKitaake11g079400
Chr11	6684843	4	Insertion	Frameshift	OsKitaake11g079400
Chr11	6684844	2	Insertion	Frameshift	OsKitaake11g079400
Chr11	6684963	4	Insertion	Frameshift	OsKitaake11g079400
Chr11	6684965	5	Insertion	Frameshift	OsKitaake11g079400
Chr11	7126802	1	Deletion	Frameshift	OsKitaake11g080950
Chr11	7127072	4	Insertion	Frameshift	OsKitaake11g080950
Chr11	7127107	1	Insertion	Frameshift	OsKitaake11g080950
Chr11	7127157	1	Deletion	Frameshift	OsKitaake11g080950
Chr11	7127160	4	Deletion	Frameshift	OsKitaake11g080950
Chr11	7127166	3	Deletion	Inframe deletion	OsKitaake11g080950
Chr11	7127170	1	Deletion	Frameshift	OsKitaake11g080950
Chr11	7128612	14	Deletion	Frameshift	OsKitaake11g081000
Chr11	7128859	2	Insertion	Frameshift	OsKitaake11g081000
Chr11	7128997	2	Insertion	Frameshift	OsKitaake11g081000
Chr11	7129024	1	Deletion	Frameshift	OsKitaake11g081000
Chr11	7129035	1	Insertion	Frameshift	OsKitaake11g081000
Chr11	7129039	1	Insertion	Frameshift	OsKitaake11g081000
Chr11	7129056	16	Insertion	Frameshift	OsKitaake11g081000
Chr11	7129087	1	Deletion	Frameshift	OsKitaake11g081000
Chr11	7131884	3	Insertion	Frameshift	OsKitaake11g081100
Chr11	7182977	6	Insertion	Frameshift	OsKitaake11g081600
Chr11	7220758	3	Insertion	Frameshift	OsKitaake11g082200
Chr11	7239305	6	Deletion	Inframe deletion	OsKitaake11g082400
Chr11	7243567	1	Deletion	Frameshift	OsKitaake11g082500
Chr11	7243862	5	Insertion	Frameshift	OsKitaake11g082500
Chr11	7244126	5	Insertion	Frameshift	OsKitaake11g082500
Chr11	7257404	3	Insertion	Frameshift	OsKitaake11g082700
Chr11	7257637	3	Insertion	Frameshift	OsKitaake11g082700
Chr11	7258241	3	Insertion	Frameshift	OsKitaake11g082700
Chr11	7258455	3	Insertion	Frameshift	OsKitaake11g082700
Chr11	7279671	6	Insertion	Frameshift	OsKitaake11g082800
Chr11	7280214	3	Insertion	Frameshift	OsKitaake11g082800
Chr11	7280238	3	Deletion	Inframe deletion	OsKitaake11g082800
Chr11	7280247	9	Deletion	Inframe deletion	OsKitaake11g082800
Chr11	7280752	1	Deletion	Frameshift	OsKitaake11g082800
Chr11	7285876	4	Insertion	Splice acceptor	OsKitaake11g082900
Chr11	7292492	6	Deletion	Inframe deletion	OsKitaake11g083000
Chr11	7308695	9	Deletion	Inframe deletion	OsKitaake11g083200
Chr11	7308728	3	Deletion	Inframe deletion	OsKitaake11g083200
Chr11	7315657	3	Deletion	Inframe deletion	OsKitaake11g083400
Chr11	7315975	3	Insertion	Frameshift	OsKitaake11g083400
Chr11	7316550	2	Deletion	Frameshift	OsKitaake11g083400
Chr11	7316560	2	Deletion	Frameshift	OsKitaake11g083400
Chr11	7316563	2	Deletion	Frameshift	OsKitaake11g083400
Chr11	7316566	3	Deletion	Inframe deletion	OsKitaake11g083400
Chr11	7316807	3	Deletion	Inframe deletion	OsKitaake11g083400
Chr11	7316873	3	Insertion	Frameshift	OsKitaake11g083400
Chr11	7321991	3	Insertion	Frameshift	OsKitaake11g083500
Chr11	7327273	1	Insertion	Frameshift	OsKitaake11g083600
Chr11	7327275	2	Insertion	Frameshift	OsKitaake11g083600
Chr11	7327787	9	Insertion	Frameshift	OsKitaake11g083600
Chr11	7327795	3	Insertion	Frameshift	OsKitaake11g083600
Chr11	7440337	3	Insertion	Frameshift	OsKitaake11g084200
Chr11	7466990	6	Insertion	Frameshift	OsKitaake11g084300
Chr11	7467206	6	Insertion	Frameshift	OsKitaake11g084300
Chr11	7468011	18	Insertion	Frameshift	OsKitaake11g084300
Chr11	7578127	1	Insertion	Frameshift	OsKitaake11g085132
Chr11	7578196	4	Insertion	Frameshift	OsKitaake11g085132
Chr11	7578441	4	Insertion	Frameshift	OsKitaake11g085132
Chr11	7578460	3	Insertion	Frameshift	OsKitaake11g085132
Chr11	9280456	1	Insertion	Frameshift	OsKitaake11g097200
Chr11	12005224	7	Insertion	Frameshift	OsKitaake11g111300
Chr11	13674461	14	Deletion	Splice acceptor	OsKitaake11g115800
Chr11	14062416	3	Insertion	Frameshift	OsKitaake11g117600
Chr11	14952731	2	Insertion	Frameshift	OsKitaake11g123101
Chr11	15621910	1	Insertion	Frameshift	OsKitaake11g125600
Chr11	15649003	1	Insertion	Frameshift	OsKitaake11g125900
Chr11	16882215	3	Deletion	Inframe deletion	OsKitaake11g132701
Chr11	16882220	1	Deletion	Frameshift	OsKitaake11g132701
Chr11	17503439	15	Insertion	Frameshift	OsKitaake11g137000
Chr11	17797861	4	Insertion	Frameshift	OsKitaake11g139300
Chr11	17855039	12	Deletion	Inframe deletion	OsKitaake11g139800
Chr11	17874864	3	Deletion	Inframe deletion	OsKitaake11g140000
Chr11	17874953	10	Insertion	Frameshift	OsKitaake11g140000
Chr11	17874955	2	Insertion	Frameshift	OsKitaake11g140000
Chr11	17874974	3	Deletion	Inframe deletion	OsKitaake11g140000
Chr11	18594718	1	Insertion	Frameshift	OsKitaake11g144100
Chr11	18594722	1	Insertion	Frameshift	OsKitaake11g144100
Chr11	18747140	2	Deletion	Frameshift	OsKitaake11g145650
Chr11	18985747	9	Deletion	Inframe deletion	OsKitaake11g147800
Chr11	19223784	1	Insertion	Frameshift	OsKitaake11g149100
Chr11	19797902	6	Deletion	Inframe deletion	OsKitaake11g154800
Chr11	19831089	9	Deletion	Inframe deletion	OsKitaake11g154900
Chr11	19832432	1	Deletion	Frameshift	OsKitaake11g154900
Chr11	19839418	9	Insertion	Frameshift	OsKitaake11g155000
Chr11	19848955	1	Deletion	Frameshift	OsKitaake11g155300
Chr11	19849000	4	Deletion	Frameshift	OsKitaake11g155300
Chr11	19849361	22	Deletion	Frameshift	OsKitaake11g155300
Chr11	19858407	16	Deletion	Frameshift	OsKitaake11g155500
Chr11	19859882	6	Insertion	Frameshift	OsKitaake11g155500
Chr11	19895008	3	Insertion	Frameshift	OsKitaake11g155800
Chr11	19895009	3	Insertion	Frameshift	OsKitaake11g155800
Chr11	19895068	3	Insertion	Frameshift	OsKitaake11g155800
Chr11	19895101	3	Insertion	Frameshift	OsKitaake11g155800
Chr11	19895118	3	Insertion	Frameshift	OsKitaake11g155800
Chr11	19895197	3	Insertion	Frameshift	OsKitaake11g155800
Chr11	19895294	1	Deletion	Frameshift	OsKitaake11g155800
Chr11	19895298	3	Deletion	Inframe deletion	OsKitaake11g155800
Chr11	19895305	3	Deletion	Inframe deletion	OsKitaake11g155800
Chr11	19895310	2	Deletion	Frameshift	OsKitaake11g155800
Chr11	19895480	3	Insertion	Frameshift	OsKitaake11g155800
Chr11	19939159	3	Insertion	Frameshift	OsKitaake11g156450
Chr11	19939437	1	Deletion	Frameshift	OsKitaake11g156450
Chr11	19939441	6	Deletion	Inframe deletion	OsKitaake11g156450
Chr11	19939449	1	Deletion	Frameshift	OsKitaake11g156450
Chr11	19939451	1	Deletion	Frameshift	OsKitaake11g156450
Chr11	19939508	3	Insertion	Frameshift	OsKitaake11g156450
Chr11	19939676	4	Insertion	Frameshift	OsKitaake11g156450
Chr11	19939677	2	Insertion	Frameshift	OsKitaake11g156450
Chr11	19941105	2	Deletion	Frameshift	OsKitaake11g156450
Chr11	19950278	3	Deletion	Inframe deletion	OsKitaake11g156600
Chr11	19988390	2	Insertion	Frameshift	OsKitaake11g157100
Chr11	19988392	1	Insertion	Frameshift	OsKitaake11g157100
Chr11	19988419	3	Insertion	Frameshift	OsKitaake11g157100
Chr11	19988468	2	Insertion	Frameshift	OsKitaake11g157100
Chr11	19988471	1	Insertion	Frameshift	OsKitaake11g157100
Chr11	19989038	2	Insertion	Frameshift	OsKitaake11g157100
Chr11	19989040	1	Insertion	Frameshift	OsKitaake11g157100
Chr11	19989041	1	Insertion	Frameshift	OsKitaake11g157100
Chr11	20052767	5	Insertion	Frameshift	OsKitaake11g157328
Chr11	20052768	3	Insertion	Frameshift	OsKitaake11g157328
Chr11	20150268	3	Deletion	Inframe deletion	OsKitaake11g157500
Chr11	20167866	5	Insertion	Frameshift	OsKitaake11g157700
Chr11	20167943	27	Insertion	Frameshift	OsKitaake11g157700
Chr11	20167956	1	Insertion	Frameshift	OsKitaake11g157700
Chr11	20168503	1	Deletion	Frameshift	OsKitaake11g157700
Chr11	20168793	1	Deletion	Frameshift	OsKitaake11g157700
Chr11	20467716	1	Insertion	Frameshift	OsKitaake11g160300
Chr11	20550198	2	Deletion	Frameshift	OsKitaake11g160800
Chr11	22411553	2	Insertion	Frameshift	OsKitaake11g177700
Chr11	22533134	12	Insertion	Frameshift	OsKitaake11g178700
Chr11	22534536	30	Deletion	Inframe deletion	OsKitaake11g178700
Chr11	22568026	1	Deletion	Frameshift	OsKitaake11g179100
Chr11	22568261	12	Deletion	Inframe deletion	OsKitaake11g179100
Chr11	22568463	3	Deletion	Inframe deletion	OsKitaake11g179100
Chr11	22581948	3	Insertion	Frameshift	OsKitaake11g179200
Chr11	22634317	2	Insertion	Frameshift	OsKitaake11g179500
Chr11	22637781	2	Insertion	Frameshift	OsKitaake11g179600
Chr11	22637829	1	Deletion	Frameshift	OsKitaake11g179600
Chr11	22637887	2	Deletion	Frameshift	OsKitaake11g179600
Chr11	22637935	4	Deletion	Frameshift	OsKitaake11g179600
Chr11	22637945	1	Deletion	Frameshift	OsKitaake11g179600
Chr11	22639713	9	Insertion	Frameshift	OsKitaake11g179700
Chr11	22639861	72	Insertion	Frameshift	OsKitaake11g179700
Chr11	22647511	3	Insertion	Frameshift	OsKitaake11g179800
Chr11	22677641	1	Deletion	Frameshift	OsKitaake11g179900
Chr11	22930656	3	Deletion	Inframe deletion	OsKitaake11g181600
Chr11	22930661	3	Deletion	Inframe deletion	OsKitaake11g181600
Chr11	22930807	25	Deletion	Frameshift	OsKitaake11g181600
Chr11	23070415	6	Deletion	Splice acceptor	OsKitaake11g183000
Chr11	23071260	6	Insertion	Frameshift	OsKitaake11g183000
Chr11	23071785	15	Deletion	Inframe deletion	OsKitaake11g183000
Chr11	23071926	1	Insertion	Frameshift	OsKitaake11g183000
Chr11	23072103	1	Insertion	Frameshift	OsKitaake11g183000
Chr11	23072104	1	Insertion	Frameshift	OsKitaake11g183000
Chr11	23072105	1	Insertion	Frameshift	OsKitaake11g183000
Chr11	23073324	3	Deletion	Inframe deletion	OsKitaake11g183000
Chr11	23073637	2	Insertion	Frameshift	OsKitaake11g183000
Chr11	23073698	1	Deletion	Frameshift	OsKitaake11g183000
Chr11	23091402	3	Deletion	Inframe deletion	OsKitaake11g183200
Chr11	23091408	3	Deletion	Inframe deletion	OsKitaake11g183200
Chr11	23091510	6	Deletion	Inframe deletion	OsKitaake11g183200
Chr11	23091519	2	Deletion	Frameshift	OsKitaake11g183200
Chr11	23091523	1	Deletion	Frameshift	OsKitaake11g183200
Chr11	23091572	6	Deletion	Inframe deletion	OsKitaake11g183200
Chr11	23091623	3	Deletion	Inframe deletion	OsKitaake11g183200
Chr11	23091671	3	Insertion	Frameshift	OsKitaake11g183200
Chr11	23100440	3	Insertion	Frameshift	OsKitaake11g183300
Chr11	23100481	2	Deletion	Frameshift	OsKitaake11g183300
Chr11	23100485	1	Deletion	Frameshift	OsKitaake11g183300
Chr11	23100489	3	Deletion	Inframe deletion	OsKitaake11g183300
Chr11	23163468	2	Insertion	Frameshift	OsKitaake11g183600
Chr11	23163470	1	Insertion	Frameshift	OsKitaake11g183600
Chr11	23165936	18	Insertion	Frameshift	OsKitaake11g183700
Chr11	23190882	8	Insertion	Frameshift	OsKitaake11g184100
Chr11	23191131	5	Deletion	Frameshift	OsKitaake11g184100
Chr11	23191182	1	Deletion	Frameshift	OsKitaake11g184100
Chr11	23205289	1	Deletion	Frameshift	OsKitaake11g184450
Chr11	23225677	3	Insertion	Frameshift	OsKitaake11g184750
Chr11	23226326	12	Insertion	Frameshift	OsKitaake11g184750
Chr11	23228859	5	Insertion	Frameshift	OsKitaake11g184801
Chr11	23228860	1	Insertion	Frameshift	OsKitaake11g184801
Chr11	23274022	3	Insertion	Frameshift	OsKitaake11g185000
Chr11	23291054	3	Insertion	Frameshift	OsKitaake11g185400
Chr11	23301594	6	Insertion	Frameshift	OsKitaake11g185600
Chr11	23301822	1	Deletion	Frameshift	OsKitaake11g185600
Chr11	23302071	6	Deletion	Inframe deletion	OsKitaake11g185600
Chr11	23332893	10	Deletion	Frameshift	OsKitaake11g185900
Chr11	23394176	8	Insertion	Frameshift	OsKitaake11g186540
Chr11	23397539	4	Deletion	Frameshift	OsKitaake11g186540
Chr11	23434409	2	Insertion	Frameshift	OsKitaake11g186700
Chr11	23434410	1	Insertion	Frameshift	OsKitaake11g186700
Chr11	23434418	1	Insertion	Frameshift	OsKitaake11g186700
Chr11	23434420	2	Insertion	Frameshift	OsKitaake11g186700
Chr11	23434423	1	Insertion	Frameshift	OsKitaake11g186700
Chr11	23434425	7	Insertion	Frameshift	OsKitaake11g186700
Chr11	23434427	1	Insertion	Frameshift	OsKitaake11g186700
Chr11	23435121	4	Insertion	Frameshift	OsKitaake11g186700
Chr11	23435126	2	Insertion	Frameshift	OsKitaake11g186700
Chr11	23435165	3	Deletion	Inframe deletion	OsKitaake11g186700
Chr11	23435179	3	Deletion	Inframe deletion	OsKitaake11g186700
Chr11	23435223	3	Deletion	Inframe deletion	OsKitaake11g186700
Chr11	23435249	1	Insertion	Frameshift	OsKitaake11g186700
Chr11	23435255	2	Insertion	Frameshift	OsKitaake11g186700
Chr11	23435318	3	Insertion	Frameshift	OsKitaake11g186700
Chr11	23435387	3	Insertion	Frameshift	OsKitaake11g186700
Chr11	23435435	1	Deletion	Frameshift	OsKitaake11g186700
Chr11	23435440	2	Deletion	Frameshift	OsKitaake11g186700
Chr11	23435659	6	Insertion	Frameshift	OsKitaake11g186700
Chr11	23435777	3	Insertion	Frameshift	OsKitaake11g186700
Chr11	23441303	1	Insertion	Frameshift	OsKitaake11g186900
Chr11	23441304	3	Insertion	Frameshift	OsKitaake11g186900
Chr11	23441370	1	Deletion	Frameshift	OsKitaake11g186900
Chr11	23441665	8	Insertion	Frameshift	OsKitaake11g186900
Chr11	23441685	3	Insertion	Frameshift	OsKitaake11g186900
Chr11	23441687	3	Insertion	Frameshift	OsKitaake11g186900
Chr11	23441708	9	Deletion	Inframe deletion	OsKitaake11g186900
Chr11	23441720	1	Deletion	Frameshift	OsKitaake11g186900
Chr11	23441738	3	Insertion	Frameshift	OsKitaake11g186900
Chr11	23459932	1	Insertion	Frameshift	OsKitaake11g187100
Chr11	23467624	4	Insertion	Start lost	OsKitaake11g187200
Chr11	23467625	9	Insertion	Frameshift	OsKitaake11g187200
Chr11	23467831	3	Insertion	Frameshift	OsKitaake11g187200
Chr11	23467864	3	Deletion	Inframe deletion	OsKitaake11g187200
Chr11	23467878	3	Deletion	Inframe deletion	OsKitaake11g187200
Chr11	23515628	1	Deletion	Frameshift	OsKitaake11g188200
Chr11	25079649	1	Deletion	Frameshift	OsKitaake11g203020
Chr11	25113160	1	Insertion	Frameshift	OsKitaake11g203030
Chr11	25113168	1	Deletion	Frameshift	OsKitaake11g203030
Chr11	25114286	1	Deletion	Frameshift	OsKitaake11g203030
Chr11	25114290	1	Insertion	Frameshift	OsKitaake11g203030
Chr11	25114506	1	Deletion	Frameshift	OsKitaake11g203030
Chr11	25114509	1	Insertion	Frameshift	OsKitaake11g203030
Chr11	25114973	1	Deletion	Frameshift	OsKitaake11g203030
Chr11	25114977	1	Insertion	Frameshift	OsKitaake11g203030
Chr11	25115035	1	Insertion	Frameshift	OsKitaake11g203030
Chr11	25115038	1	Deletion	Frameshift	OsKitaake11g203030
Chr11	25165517	11	Deletion	Splice acceptor	OsKitaake11g203055
Chr11	25626353	1	Insertion	Splice donor	OsKitaake11g206800
Chr11	26617427	15	Insertion	Frameshift	OsKitaake11g216400
Chr11	26617499	12	Deletion	Inframe deletion	OsKitaake11g216400
Chr11	26635898	21	Insertion	Frameshift	OsKitaake11g216700
Chr11	26644261	9	Insertion	Frameshift	OsKitaake11g216800
Chr11	26644312	6	Insertion	Frameshift	OsKitaake11g216800
Chr11	26647661	3	Deletion	Inframe deletion	OsKitaake11g216900
Chr11	26652442	1	Insertion	Frameshift	OsKitaake11g216900
Chr11	26652475	7	Deletion	Frameshift	OsKitaake11g216900
Chr11	26693761	9	Insertion	Frameshift	OsKitaake11g217500
Chr11	26693792	3	Deletion	Inframe deletion	OsKitaake11g217500
Chr11	26693852	3	Insertion	Frameshift	OsKitaake11g217500
Chr11	26693946	3	Insertion	Frameshift	OsKitaake11g217500
Chr11	26693972	9	Insertion	Frameshift	OsKitaake11g217500
Chr11	26694101	3	Deletion	Inframe deletion	OsKitaake11g217500
Chr11	26821882	3	Deletion	Inframe deletion	OsKitaake11g218200
Chr11	26821891	6	Deletion	Inframe deletion	OsKitaake11g218200
Chr11	26824012	3	Deletion	Inframe deletion	OsKitaake11g218200
Chr11	26824027	1	Deletion	Frameshift	OsKitaake11g218200
Chr11	26824032	1	Insertion	Frameshift	OsKitaake11g218200
Chr11	26824052	3	Insertion	Frameshift	OsKitaake11g218200
Chr11	26824056	1	Insertion	Frameshift	OsKitaake11g218200
Chr11	26824061	1	Deletion	Frameshift	OsKitaake11g218200
Chr11	26853570	1	Deletion	Frameshift	OsKitaake11g218400
Chr11	26906863	6	Insertion	Frameshift	OsKitaake11g218700
Chr11	26907538	6	Deletion	Inframe deletion	OsKitaake11g218700
Chr11	26907553	1	Deletion	Frameshift	OsKitaake11g218700
Chr11	26907555	5	Deletion	Frameshift	OsKitaake11g218700
Chr11	26907772	1	Insertion	Frameshift	OsKitaake11g218700
Chr11	26907773	4	Insertion	Frameshift	OsKitaake11g218700
Chr11	26907774	1	Insertion	Frameshift	OsKitaake11g218700
Chr11	26907777	3	Insertion	Frameshift	OsKitaake11g218700
Chr11	26908318	1	Insertion	Frameshift	OsKitaake11g218700
Chr11	26908319	1	Insertion	Frameshift	OsKitaake11g218700
Chr11	26908320	1	Insertion	Frameshift	OsKitaake11g218700
Chr11	26912439	3	Deletion	Splice acceptor	OsKitaake11g218800
Chr11	26926243	1	Insertion	Frameshift	OsKitaake11g219100
Chr11	27029380	48	Deletion	Inframe deletion	OsKitaake11g220300
Chr11	28221337	3	Deletion	Inframe deletion	OsKitaake11g231700
Chr11	28221774	1	Deletion	Frameshift	OsKitaake11g231700
Chr11	28235954	1	Deletion	Frameshift	OsKitaake11g232000
Chr11	28235956	5	Deletion	Frameshift	OsKitaake11g232000
Chr11	28235986	1	Deletion	Frameshift	OsKitaake11g232000
Chr11	28235988	2	Deletion	Frameshift	OsKitaake11g232000
Chr11	28272187	3	Deletion	Inframe deletion	OsKitaake11g232100
Chr11	28273929	3	Deletion	Inframe deletion	OsKitaake11g232100
Chr11	28273959	5	Deletion	Frameshift	OsKitaake11g232100
Chr11	28273965	1	Deletion	Frameshift	OsKitaake11g232100
Chr11	28504965	1	Insertion	Frameshift	OsKitaake11g233300
Chr11	28511442	8	Deletion	Frameshift	OsKitaake11g233400
Chr11	28511451	4	Deletion	Frameshift	OsKitaake11g233400
Chr11	28511511	9	Insertion	Frameshift	OsKitaake11g233400
Chr11	28511513	3	Insertion	Frameshift	OsKitaake11g233400
Chr11	28511516	3	Insertion	Frameshift	OsKitaake11g233400
Chr11	28511521	10	Insertion	Frameshift	OsKitaake11g233400
Chr11	28511522	2	Insertion	Frameshift	OsKitaake11g233400
Chr11	28517510	1	Deletion	Frameshift	OsKitaake11g233500
Chr11	28518009	3	Deletion	Inframe deletion	OsKitaake11g233500
Chr11	28521492	3	Insertion	Frameshift	OsKitaake11g233601
Chr11	28532728	2	Deletion	Frameshift	OsKitaake11g233800
Chr11	28532880	50	Deletion	Frameshift	OsKitaake11g233800
Chr11	28532931	3	Deletion	Inframe deletion	OsKitaake11g233800
Chr11	28595706	3	Insertion	Frameshift	OsKitaake11g234300
Chr11	28619698	9	Deletion	Inframe deletion	OsKitaake11g234500
Chr11	28641474	4	Insertion	Frameshift	OsKitaake11g234700
Chr11	28679565	3	Deletion	Inframe deletion	OsKitaake11g235101
Chr11	28680608	15	Insertion	Frameshift	OsKitaake11g235101
Chr11	28680684	1	Deletion	Frameshift	OsKitaake11g235101
Chr11	28729532	2	Deletion	Frameshift	OsKitaake11g235300
Chr11	28729763	9	Deletion	Inframe deletion	OsKitaake11g235300
Chr11	28739056	2	Deletion	Frameshift	OsKitaake11g235400
Chr11	28739060	9	Deletion	Inframe deletion	OsKitaake11g235400
Chr11	28739070	1	Deletion	Frameshift	OsKitaake11g235400
Chr11	28739082	3	Deletion	Inframe deletion	OsKitaake11g235400
Chr11	28740842	3	Deletion	Inframe deletion	OsKitaake11g235400
Chr11	28803100	1	Deletion	Frameshift	OsKitaake11g235700
Chr11	28842445	3	Insertion	Frameshift	OsKitaake11g236000
Chr11	28842463	6	Insertion	Frameshift	OsKitaake11g236000
Chr11	28842468	3	Insertion	Frameshift	OsKitaake11g236000
Chr11	28842796	1	Insertion	Frameshift	OsKitaake11g236000
Chr11	28842797	2	Insertion	Frameshift	OsKitaake11g236000
Chr11	28842804	3	Insertion	Frameshift	OsKitaake11g236000
Chr11	28842811	6	Insertion	Frameshift	OsKitaake11g236000
Chr11	28842977	6	Deletion	Inframe deletion	OsKitaake11g236000
Chr11	28842988	12	Deletion	Inframe deletion	OsKitaake11g236000
Chr11	28877509	3	Deletion	Inframe deletion	OsKitaake11g236500
Chr11	28880755	2	Deletion	Frameshift	OsKitaake11g236500
Chr11	28889346	9	Insertion	Frameshift	OsKitaake11g236600
Chr11	28889583	6	Deletion	Inframe deletion	OsKitaake11g236600
Chr11	28889593	6	Deletion	Inframe deletion	OsKitaake11g236600
Chr11	28951950	8	Insertion	Splice acceptor	OsKitaake11g236700
Chr11	28953272	1	Deletion	Frameshift	OsKitaake11g236700
Chr11	28953276	1	Insertion	Frameshift	OsKitaake11g236700
Chr11	28953629	2	Deletion	Frameshift	OsKitaake11g236700
Chr11	28972664	3	Deletion	Inframe deletion	OsKitaake11g237000
Chr11	28973504	2	Insertion	Frameshift	OsKitaake11g237000
Chr11	28973505	1	Insertion	Frameshift	OsKitaake11g237000
Chr11	28973526	1	Insertion	Frameshift	OsKitaake11g237000
Chr11	28973527	3	Insertion	Frameshift	OsKitaake11g237000
Chr11	28979891	6	Insertion	Frameshift	OsKitaake11g237200
Chr11	28979893	1	Insertion	Frameshift	OsKitaake11g237200
Chr11	28979894	1	Insertion	Frameshift	OsKitaake11g237200
Chr11	28979895	1	Insertion	Frameshift	OsKitaake11g237200
Chr11	28980050	1	Deletion	Frameshift	OsKitaake11g237200
Chr11	28980053	1	Insertion	Frameshift	OsKitaake11g237200
Chr11	28980608	2	Insertion	Frameshift	OsKitaake11g237200
Chr11	28981178	6	Deletion	Inframe deletion	OsKitaake11g237200
Chr11	29011105	5	Insertion	Frameshift	OsKitaake11g237600
Chr11	29011176	1	Deletion	Frameshift	OsKitaake11g237600
Chr11	29011178	1	Insertion	Frameshift	OsKitaake11g237600
Chr11	29011195	1	Insertion	Frameshift	OsKitaake11g237600
Chr11	29011200	1	Deletion	Frameshift	OsKitaake11g237600
Chr11	29012846	2	Insertion	Frameshift	OsKitaake11g237600
Chr11	29012848	4	Insertion	Frameshift	OsKitaake11g237600
Chr11	29030755	6	Insertion	Frameshift	OsKitaake11g237700
Chr11	29030764	1	Insertion	Frameshift	OsKitaake11g237700
Chr11	29030765	2	Insertion	Frameshift	OsKitaake11g237700
Chr11	29030771	3	Insertion	Frameshift	OsKitaake11g237700
Chr11	29030781	3	Insertion	Frameshift	OsKitaake11g237700
Chr11	29032217	6	Deletion	Inframe deletion	OsKitaake11g237700
Chr11	29032228	8	Deletion	Frameshift	OsKitaake11g237700
Chr11	29032237	1	Deletion	Frameshift	OsKitaake11g237700
Chr11	29032334	3	Deletion	Inframe deletion	OsKitaake11g237700
Chr11	29033149	3	Insertion	Frameshift	OsKitaake11g237700
Chr11	29033222	3	Insertion	Frameshift	OsKitaake11g237700
Chr11	29033227	3	Insertion	Frameshift	OsKitaake11g237700
Chr11	29033246	1	Insertion	Frameshift	OsKitaake11g237700
Chr11	29033247	1	Insertion	Frameshift	OsKitaake11g237700
Chr11	29033248	3	Insertion	Frameshift	OsKitaake11g237700
Chr11	29033252	1	Insertion	Frameshift	OsKitaake11g237700
Chr11	29033419	4	Insertion	Frameshift	OsKitaake11g237700
Chr11	29033820	1	Deletion	Frameshift	OsKitaake11g237700
Chr11	29033822	2	Deletion	Frameshift	OsKitaake11g237700
Chr11	29051449	6	Deletion	Inframe deletion	OsKitaake11g238000
Chr11	29053806	1	Insertion	Frameshift	OsKitaake11g238000
Chr11	29053810	1	Deletion	Frameshift	OsKitaake11g238000
Chr11	29054113	30	Insertion	Frameshift	OsKitaake11g238000
Chr11	29101952	1	Deletion	Frameshift	OsKitaake11g238500
Chr11	29101957	1	Insertion	Frameshift	OsKitaake11g238500
Chr11	29102083	1	Insertion	Frameshift	OsKitaake11g238500
Chr11	29102087	1	Deletion	Frameshift	OsKitaake11g238500
Chr11	29150888	3	Insertion	Frameshift	OsKitaake11g238900
Chr11	29150989	8	Deletion	Frameshift	OsKitaake11g238900
Chr11	29155642	2	Insertion	Frameshift	OsKitaake11g239000
Chr11	29155646	3	Insertion	Frameshift	OsKitaake11g239000
Chr11	29155655	13	Insertion	Frameshift	OsKitaake11g239000
Chr11	29415313	2	Deletion	Frameshift	OsKitaake11g240800
Chr11	29428741	2	Insertion	Frameshift	OsKitaake11g241100
Chr11	29428781	5	Deletion	Frameshift	OsKitaake11g241100
Chr11	29434273	12	Insertion	Frameshift	OsKitaake11g241300
Chr11	29435360	2	Deletion	Frameshift	OsKitaake11g241400
Chr11	29435368	2	Deletion	Frameshift	OsKitaake11g241400
Chr11	29435371	2	Deletion	Frameshift	OsKitaake11g241400
Chr11	29435378	2	Deletion	Frameshift	OsKitaake11g241400
Chr11	29435381	4	Deletion	Frameshift	OsKitaake11g241400
Chr11	29439813	3	Insertion	Frameshift	OsKitaake11g241500
Chr11	29439845	3	Insertion	Frameshift	OsKitaake11g241500
Chr11	29453348	27	Deletion	Inframe deletion	OsKitaake11g241700
Chr11	29456385	6	Insertion	Frameshift	OsKitaake11g241900
Chr11	29635458	10	Deletion	Frameshift	OsKitaake11g244500
Chr12	582880	1	Insertion	Frameshift	OsKitaake12g007300
Chr12	995246	1	Deletion	Frameshift	OsKitaake12g014800
Chr12	2264395	2	Deletion	Frameshift	OsKitaake12g035050
Chr12	2403047	3	Insertion	Frameshift	OsKitaake12g036800
Chr12	2453793	1	Insertion	Frameshift	OsKitaake12g037250
Chr12	2477000	1	Insertion	Frameshift	OsKitaake12g037300
Chr12	2481357	6	Insertion	Frameshift	OsKitaake12g037400
Chr12	3122302	1	Insertion	Frameshift	OsKitaake12g045400
Chr12	3334325	1	Insertion	Frameshift	OsKitaake12g047400
Chr12	3760889	3	Deletion	Inframe deletion	OsKitaake12g052300
Chr12	3770274	24	Insertion	Frameshift	OsKitaake12g052400
Chr12	3887857	2	Insertion	Frameshift	OsKitaake12g053500
Chr12	4061779	1	Insertion	Frameshift	OsKitaake12g055300
Chr12	4078387	1	Insertion	Frameshift	OsKitaake12g055500
Chr12	4078460	1	Insertion	Frameshift	OsKitaake12g055500
Chr12	4078514	1	Insertion	Frameshift	OsKitaake12g055500
Chr12	4078518	1	Insertion	Frameshift	OsKitaake12g055500
Chr12	4078522	2	Deletion	Frameshift	OsKitaake12g055500
Chr12	4078529	1	Deletion	Frameshift	OsKitaake12g055500
Chr12	4078535	1	Insertion	Frameshift	OsKitaake12g055500
Chr12	4078538	1	Insertion	Frameshift	OsKitaake12g055500
Chr12	4078545	1	Insertion	Frameshift	OsKitaake12g055500
Chr12	4078553	1	Insertion	Frameshift	OsKitaake12g055500
Chr12	4078572	1	Insertion	Frameshift	OsKitaake12g055500
Chr12	4080946	1	Insertion	Frameshift	OsKitaake12g055600
Chr12	4080952	1	Insertion	Frameshift	OsKitaake12g055600
Chr12	4080960	1	Insertion	Frameshift	OsKitaake12g055600
Chr12	4080962	1	Insertion	Frameshift	OsKitaake12g055600
Chr12	4263175	1	Insertion	Frameshift	OsKitaake12g058100
Chr12	4263191	1	Insertion	Frameshift	OsKitaake12g058100
Chr12	4690378	1	Deletion	Frameshift	OsKitaake12g061700
Chr12	4900696	1	Insertion	Frameshift	OsKitaake12g063200
Chr12	4900701	1	Deletion	Frameshift	OsKitaake12g063200
Chr12	4900704	1	Deletion	Frameshift	OsKitaake12g063200
Chr12	4900707	1	Deletion	Frameshift	OsKitaake12g063200
Chr12	4900709	1	Deletion	Frameshift	OsKitaake12g063200
Chr12	4900720	3	Deletion	Inframe deletion	OsKitaake12g063200
Chr12	4900727	3	Deletion	Inframe deletion	OsKitaake12g063200
Chr12	5705031	1	Deletion	Frameshift	OsKitaake12g069101
Chr12	5724296	1	Insertion	Frameshift	OsKitaake12g069326
Chr12	5750260	12	Deletion	Inframe deletion	OsKitaake12g069700
Chr12	5872964	3	Insertion	Frameshift	OsKitaake12g070800
Chr12	6107419	3	Insertion	Frameshift	OsKitaake12g072000
Chr12	6179398	3	Insertion	Frameshift	OsKitaake12g071525
Chr12	6179416	9	Insertion	Frameshift	OsKitaake12g071525
Chr12	6214087	9	Insertion	Frameshift	OsKitaake12g072200
Chr12	6429898	3	Deletion	Inframe deletion	OsKitaake12g074000
Chr12	6443024	6	Deletion	Inframe deletion	OsKitaake12g074200
Chr12	6443069	12	Insertion	Frameshift	OsKitaake12g074200
Chr12	6443502	1	Insertion	Frameshift	OsKitaake12g074300
Chr12	6503898	73	Insertion	Frameshift	OsKitaake12g074800
Chr12	6503918	5	Insertion	Frameshift	OsKitaake12g074800
Chr12	6524637	2	Insertion	Frameshift	OsKitaake12g075201
Chr12	6525025	7	Insertion	Frameshift	OsKitaake12g075201
Chr12	6574016	5	Deletion	Frameshift	OsKitaake12g075600
Chr12	6574023	5	Deletion	Frameshift	OsKitaake12g075600
Chr12	6605079	2	Insertion	Frameshift	OsKitaake12g075700
Chr12	6605080	2	Insertion	Frameshift	OsKitaake12g075700
Chr12	6605081	1	Insertion	Frameshift	OsKitaake12g075700
Chr12	6605340	1	Insertion	Frameshift	OsKitaake12g075700
Chr12	6605345	1	Deletion	Frameshift	OsKitaake12g075700
Chr12	6606131	1	Deletion	Frameshift	OsKitaake12g075700
Chr12	6613452	3	Deletion	Inframe deletion	OsKitaake12g075800
Chr12	6619802	3	Insertion	Frameshift	OsKitaake12g075900
Chr12	6619941	3	Insertion	Frameshift	OsKitaake12g075900
Chr12	6623371	2	Insertion	Frameshift	OsKitaake12g076000
Chr12	6654862	3	Insertion	Frameshift	OsKitaake12g076250
Chr12	6654893	3	Insertion	Frameshift	OsKitaake12g076250
Chr12	6655004	3	Deletion	Inframe deletion	OsKitaake12g076250
Chr12	6655145	8	Deletion	Frameshift	OsKitaake12g076250
Chr12	6655154	1	Deletion	Frameshift	OsKitaake12g076250
Chr12	6688075	9	Insertion	Frameshift	OsKitaake12g076450
Chr12	7135089	1	Deletion	Frameshift	OsKitaake12g080000
Chr12	8390354	1	Insertion	Frameshift	OsKitaake12g087100
Chr12	8701325	3	Deletion	Inframe deletion	OsKitaake12g088100
Chr12	9816327	1	Insertion	Frameshift	OsKitaake12g094100
Chr12	12505366	1	Deletion	Frameshift	OsKitaake12g106650
Chr12	13450756	24	Insertion	Frameshift	OsKitaake12g111400
Chr12	13607465	1	Insertion	Frameshift	OsKitaake12g112200
Chr12	14220706	1	Deletion	Frameshift	OsKitaake12g115500
Chr12	16068988	1	Insertion	Frameshift	OsKitaake12g123250
Chr12	17977243	3	Deletion	Inframe deletion	OsKitaake12g132200
Chr12	17995070	3	Insertion	Frameshift	OsKitaake12g132300
Chr12	17995121	3	Deletion	Inframe deletion	OsKitaake12g132300
Chr12	18021247	9	Deletion	Inframe deletion	OsKitaake12g132600
Chr12	18021311	3	Insertion	Frameshift	OsKitaake12g132600
Chr12	18021945	3	Deletion	Inframe deletion	OsKitaake12g132600
Chr12	18032427	1	Deletion	Frameshift	OsKitaake12g132700
Chr12	18200037	3	Deletion	Inframe deletion	OsKitaake12g133575
Chr12	18200163	9	Insertion	Frameshift	OsKitaake12g133575
Chr12	18200172	1	Insertion	Frameshift	OsKitaake12g133575
Chr12	18200176	4	Insertion	Frameshift	OsKitaake12g133575
Chr12	18200177	1	Insertion	Frameshift	OsKitaake12g133575
Chr12	18200224	4	Insertion	Frameshift	OsKitaake12g133575
Chr12	18200225	3	Insertion	Frameshift	OsKitaake12g133575
Chr12	18200226	1	Insertion	Frameshift	OsKitaake12g133575
Chr12	18200231	4	Insertion	Frameshift	OsKitaake12g133575
Chr12	18200300	3	Insertion	Frameshift	OsKitaake12g133575
Chr12	18200579	3	Deletion	Inframe deletion	OsKitaake12g133575
Chr12	18200668	4	Insertion	Frameshift	OsKitaake12g133575
Chr12	18200737	1	Deletion	Frameshift	OsKitaake12g133575
Chr12	18200739	2	Deletion	Frameshift	OsKitaake12g133575
Chr12	18200750	3	Deletion	Inframe deletion	OsKitaake12g133575
Chr12	18226051	3	Deletion	Inframe deletion	OsKitaake12g133600
Chr12	18226123	3	Insertion	Frameshift	OsKitaake12g133600
Chr12	18226250	2	Deletion	Frameshift	OsKitaake12g133600
Chr12	18226253	1	Deletion	Frameshift	OsKitaake12g133600
Chr12	18226630	20	Deletion	Frameshift	OsKitaake12g133600
Chr12	18226655	4	Deletion	Frameshift	OsKitaake12g133600
Chr12	18237518	12	Deletion	Inframe deletion	OsKitaake12g133650
Chr12	18246473	6	Insertion	Frameshift	OsKitaake12g133700
Chr12	18250538	9	Deletion	Inframe deletion	OsKitaake12g133800
Chr12	18250656	6	Deletion	Inframe deletion	OsKitaake12g133800
Chr12	18250887	6	Insertion	Frameshift	OsKitaake12g133800
Chr12	18250979	7	Deletion	Frameshift	OsKitaake12g133800
Chr12	18250988	2	Deletion	Frameshift	OsKitaake12g133800
Chr12	18250999	3	Deletion	Inframe deletion	OsKitaake12g133800
Chr12	18251026	3	Deletion	Inframe deletion	OsKitaake12g133800
Chr12	18314972	4	Deletion	Frameshift	OsKitaake12g134000
Chr12	18314978	7	Deletion	Frameshift	OsKitaake12g134000
Chr12	18315105	3	Deletion	Inframe deletion	OsKitaake12g134000
Chr12	18315125	3	Deletion	Inframe deletion	OsKitaake12g134000
Chr12	18315406	3	Deletion	Inframe deletion	OsKitaake12g134000
Chr12	18317953	3	Insertion	Frameshift	OsKitaake12g134100
Chr12	18485373	6	Insertion	Frameshift	OsKitaake12g134900
Chr12	18485589	3	Deletion	Inframe deletion	OsKitaake12g134900
Chr12	18485773	6	Insertion	Frameshift	OsKitaake12g134900
Chr12	18493662	2	Insertion	Frameshift	OsKitaake12g135000
Chr12	18592787	2	Insertion	Frameshift	OsKitaake12g136800
Chr12	18592788	1	Insertion	Frameshift	OsKitaake12g136800
Chr12	18592832	4	Deletion	Frameshift	OsKitaake12g136800
Chr12	18592838	1	Deletion	Frameshift	OsKitaake12g136800
Chr12	18592844	1	Deletion	Frameshift	OsKitaake12g136800
Chr12	18592852	3	Deletion	Inframe deletion	OsKitaake12g136800
Chr12	18593079	3	Deletion	Inframe deletion	OsKitaake12g136800
Chr12	18616387	1	Insertion	Frameshift	OsKitaake12g137000
Chr12	18631300	2	Insertion	Frameshift	OsKitaake12g137200
Chr12	18631305	1	Insertion	Frameshift	OsKitaake12g137200
Chr12	18631326	11	Deletion	Frameshift	OsKitaake12g137200
Chr12	18631338	1	Deletion	Frameshift	OsKitaake12g137200
Chr12	18631478	6	Insertion	Frameshift	OsKitaake12g137200
Chr12	18631530	17	Insertion	Frameshift	OsKitaake12g137200
Chr12	18631535	3	Insertion	Frameshift	OsKitaake12g137200
Chr12	18631543	1	Insertion	Frameshift	OsKitaake12g137200
Chr12	18631545	2	Insertion	Frameshift	OsKitaake12g137200
Chr12	18638905	2	Insertion	Frameshift	OsKitaake12g137300
Chr12	18638907	1	Insertion	Frameshift	OsKitaake12g137300
Chr12	18642718	3	Insertion	Frameshift	OsKitaake12g137300
Chr12	18642862	12	Deletion	Inframe deletion	OsKitaake12g137300
Chr12	18654822	4	Insertion	Splice acceptor	OsKitaake12g137400
Chr12	18689540	2	Insertion	Frameshift	OsKitaake12g137900
Chr12	18689542	1	Insertion	Frameshift	OsKitaake12g137900
Chr12	18692519	1	Insertion	Frameshift	OsKitaake12g138000
Chr12	18703858	3	Insertion	Frameshift	OsKitaake12g138200
Chr12	18704615	3	Deletion	Inframe deletion	OsKitaake12g138200
Chr12	18994094	6	Insertion	Frameshift	OsKitaake12g140200
Chr12	19016162	3	Insertion	Frameshift	OsKitaake12g140400
Chr12	19156402	1	Insertion	Splice acceptor	OsKitaake12g142400
Chr12	19349940	1	Insertion	Frameshift	OsKitaake12g144900
Chr12	20814760	1	Insertion	Frameshift	OsKitaake12g163000
Chr12	22042056	1	Insertion	Frameshift	OsKitaake12g173400
Chr12	22582264	9	Deletion	Inframe deletion	OsKitaake12g177300
Chr12	23032375	3	Insertion	Frameshift	OsKitaake12g183000
Chr12	23462802	1	Insertion	Frameshift	OsKitaake12g187900
Chr12	24584888	1	Insertion	Frameshift	OsKitaake12g199101
Chr12	24590677	1	Insertion	Frameshift	OsKitaake12g199200
Chr12	24848283	1	Deletion	Frameshift	OsKitaake12g201600
Chr12	24999784	1	Insertion	Frameshift	OsKitaake12g202600
Chr12	25000275	3	Deletion	Inframe deletion	OsKitaake12g202600
Chr12	25198775	3	Deletion	Inframe deletion	OsKitaake12g205000
Chr12	25275641	1	Deletion	Frameshift	OsKitaake12g206050
Chr12	25421156	1	Insertion	Frameshift	OsKitaake12g208600
Chr12	25421163	1	Deletion	Frameshift	OsKitaake12g208600
Chr12	25421165	1	Deletion	Frameshift	OsKitaake12g208600
Chr12	25421172	1	Insertion	Frameshift	OsKitaake12g208600
Chr12	25509124	1	Insertion	Frameshift	OsKitaake12g209750
Chr12	25542918	1	Deletion	Frameshift	OsKitaake12g209900
Chr12	26581261	9	Insertion	Frameshift	OsKitaake12g220600
Chr12	26583714	3	Insertion	Frameshift	OsKitaake12g220700
Chr12	26583839	3	Deletion	Inframe deletion	OsKitaake12g220700
Chr12	26584069	3	Insertion	Frameshift	OsKitaake12g220700
Chr12	26584097	3	Insertion	Frameshift	OsKitaake12g220700
Chr12	26584153	3	Insertion	Frameshift	OsKitaake12g220700
Chr12	26584624	6	Insertion	Frameshift	OsKitaake12g220700
Chr12	26585944	3	Deletion	Inframe deletion	OsKitaake12g220700
Chr12	26585965	3	Deletion	Inframe deletion	OsKitaake12g220700
Chr12	26591856	15	Deletion	Inframe deletion	OsKitaake12g220800
Chr12	26591936	3	Insertion	Frameshift	OsKitaake12g220800
Chr12	26631198	1	Insertion	Frameshift	OsKitaake12g221350
Chr12	26631230	3	Insertion	Frameshift	OsKitaake12g221350
Chr12	26631254	3	Deletion	Inframe deletion	OsKitaake12g221350
Chr12	26631603	1	Deletion	Frameshift	OsKitaake12g221350
Chr12	26631606	5	Deletion	Frameshift	OsKitaake12g221350
Chr12	26631656	6	Insertion	Frameshift	OsKitaake12g221350
Chr12	26631679	6	Insertion	Frameshift	OsKitaake12g221350
Chr12	26635590	3	Deletion	Inframe deletion	OsKitaake12g221400
Chr12	26656130	1	Insertion	Frameshift	OsKitaake12g221650
Chr12	26656297	3	Deletion	Inframe deletion	OsKitaake12g221650
Chr12	26701044	1	Deletion	Frameshift	OsKitaake12g221800
Chr12	26704467	6	Insertion	Frameshift	OsKitaake12g221800
Chr12	26717057	2	Insertion	Frameshift	OsKitaake12g222000
Chr12	26717062	4	Insertion	Frameshift	OsKitaake12g222000
Chr12	26717316	3	Insertion	Frameshift	OsKitaake12g222000
Chr12	26718394	1	Deletion	Splice donor	OsKitaake12g222000
Chr12	26742051	2	Insertion	Frameshift	OsKitaake12g222200
Chr12	26742055	2	Insertion	Frameshift	OsKitaake12g222200
Chr12	26742057	1	Insertion	Frameshift	OsKitaake12g222200
Chr12	26742062	1	Insertion	Frameshift	OsKitaake12g222200
Chr12	26744126	1	Insertion	Frameshift	OsKitaake12g222200
Chr12	26744128	2	Insertion	Frameshift	OsKitaake12g222200
Chr12	26788477	1	Insertion	Frameshift	OsKitaake12g223000
Chr12	26811234	1	Insertion	Frameshift	OsKitaake12g223300
Chr12	26934851	1	Insertion	Frameshift	OsKitaake12g225500
Chr12	26969855	3	Insertion	Frameshift	OsKitaake12g226100
Chr2	88014	2	Insertion	Frameshift	OsKitaake02g001400
Chr2	164426	4	Insertion	Frameshift	OsKitaake02g002500
Chr2	3226021	12	Deletion	Inframe deletion	OsKitaake02g046500
Chr2	3280084	20	Deletion	Frameshift	OsKitaake02g047650
Chr2	3280317	10	Insertion	Frameshift	OsKitaake02g047650
Chr2	3289418	3	Insertion	Frameshift	OsKitaake02g047900
Chr2	3307257	1	Deletion	Frameshift	OsKitaake02g048100
Chr2	3307260	2	Deletion	Frameshift	OsKitaake02g048100
Chr2	4894866	9	Deletion	Inframe deletion	OsKitaake02g067700
Chr2	5048704	3	Deletion	Inframe deletion	OsKitaake02g070100
Chr2	5875586	3	Deletion	Inframe deletion	OsKitaake02g081000
Chr2	6402899	1	Insertion	Frameshift	OsKitaake02g086850
Chr2	6536147	1	Insertion	Frameshift	OsKitaake02g088800
Chr2	6624831	16	Deletion	Frameshift	OsKitaake02g090200
Chr2	7863541	37	Insertion	Frameshift	OsKitaake02g102600
Chr2	8405654	9	Deletion	Inframe deletion	OsKitaake02g106700
Chr2	9123761	6	Insertion	Frameshift	OsKitaake02g113900
Chr2	9319978	1	Deletion	Frameshift	OsKitaake02g115850
Chr2	9834893	11	Deletion	Frameshift	OsKitaake02g119400
Chr2	10155378	2	Deletion	Frameshift	OsKitaake02g121901
Chr2	10796877	3	Insertion	Frameshift	OsKitaake02g126500
Chr2	10952028	3	Deletion	Inframe deletion	OsKitaake02g128200
Chr2	12360258	2	Insertion	Frameshift	OsKitaake02g139700
Chr2	13020247	2	Deletion	Frameshift	OsKitaake02g145100
Chr2	13114187	2	Deletion	Frameshift	OsKitaake02g146200
Chr2	13645252	1	Deletion	Frameshift	OsKitaake02g150150
Chr2	14362745	1	Insertion	Splice acceptor	OsKitaake02g154000
Chr2	14377556	1	Insertion	Frameshift	OsKitaake02g155500
Chr2	14408915	1	Insertion	Frameshift	OsKitaake02g155876
Chr2	15267398	1	Insertion	Frameshift	OsKitaake02g159250
Chr2	15504171	1	Insertion	Frameshift	OsKitaake02g160700
Chr2	15853531	1	Deletion	Frameshift	OsKitaake02g164250
Chr2	16392243	1	Insertion	Frameshift	OsKitaake02g167950
Chr2	16531099	1	Insertion	Splice acceptor	OsKitaake02g169000
Chr2	16531100	1	Insertion	Splice acceptor	OsKitaake02g169000
Chr2	16576090	24	Deletion	Inframe deletion	OsKitaake02g169300
Chr2	16587218	10	Deletion	Frameshift	OsKitaake02g169600
Chr2	16587578	7	Insertion	Splice donor	OsKitaake02g169600
Chr2	16590573	4	Deletion	Frameshift	OsKitaake02g169600
Chr2	16592492	33	Deletion	Inframe deletion	OsKitaake02g169700
Chr2	16592788	1	Deletion	Frameshift	OsKitaake02g169700
Chr2	16592792	1	Insertion	Frameshift	OsKitaake02g169700
Chr2	16622807	1	Insertion	Frameshift	OsKitaake02g170000
Chr2	16623192	6	Deletion	Inframe deletion	OsKitaake02g170000
Chr2	16645046	3	Deletion	Inframe deletion	OsKitaake02g170300
Chr2	16659693	1	Deletion	Frameshift	OsKitaake02g170600
Chr2	16763886	25	Insertion	Frameshift	OsKitaake02g171400
Chr2	16764993	22	Insertion	Frameshift	OsKitaake02g171400
Chr2	16820348	1	Insertion	Splice donor	OsKitaake02g171600
Chr2	16851042	1	Deletion	Frameshift	OsKitaake02g172000
Chr2	16851443	1	Insertion	Frameshift	OsKitaake02g172000
Chr2	16851768	3	Deletion	Inframe deletion	OsKitaake02g172000
Chr2	16852121	1	Deletion	Frameshift	OsKitaake02g172000
Chr2	16955598	3	Deletion	Inframe deletion	OsKitaake02g172200
Chr2	16955602	4	Deletion	Frameshift	OsKitaake02g172200
Chr2	16955607	1	Deletion	Frameshift	OsKitaake02g172200
Chr2	16955609	1	Deletion	Frameshift	OsKitaake02g172200
Chr2	16955612	2	Deletion	Frameshift	OsKitaake02g172200
Chr2	16955616	2	Deletion	Frameshift	OsKitaake02g172200
Chr2	16955619	1	Deletion	Frameshift	OsKitaake02g172200
Chr2	16955621	7	Deletion	Frameshift	OsKitaake02g172200
Chr2	16956310	15	Insertion	Frameshift	OsKitaake02g172200
Chr2	16980925	9	Deletion	Inframe deletion	OsKitaake02g172300
Chr2	16985887	3	Insertion	Frameshift	OsKitaake02g172600
Chr2	17108238	3	Deletion	Inframe deletion	OsKitaake02g172800
Chr2	17111182	3	Deletion	Inframe deletion	OsKitaake02g172800
Chr2	17130316	12	Deletion	Inframe deletion	OsKitaake02g173000
Chr2	17150571	10	Deletion	Splice donor	OsKitaake02g173200
Chr2	17225762	17	Deletion	Splice donor	OsKitaake02g173600
Chr2	17252857	3	Insertion	Frameshift	OsKitaake02g173700
Chr2	17599260	1	Insertion	Frameshift	OsKitaake02g176500
Chr2	17960086	3	Insertion	Frameshift	OsKitaake02g178700
Chr2	18018505	1	Deletion	Frameshift	OsKitaake02g179400
Chr2	18018508	1	Deletion	Frameshift	OsKitaake02g179400
Chr2	18018510	1	Deletion	Frameshift	OsKitaake02g179400
Chr2	18018515	1	Insertion	Frameshift	OsKitaake02g179400
Chr2	18018521	1	Deletion	Frameshift	OsKitaake02g179400
Chr2	18018629	4	Insertion	Frameshift	OsKitaake02g179400
Chr2	18018640	4	Insertion	Frameshift	OsKitaake02g179400
Chr2	18018653	2	Deletion	Frameshift	OsKitaake02g179400
Chr2	18018677	2	Deletion	Frameshift	OsKitaake02g179400
Chr2	18018738	7	Insertion	Frameshift	OsKitaake02g179400
Chr2	18018774	1	Deletion	Frameshift	OsKitaake02g179400
Chr2	18092673	3	Insertion	Frameshift	OsKitaake02g180000
Chr2	18092680	3	Insertion	Frameshift	OsKitaake02g180000
Chr2	18101088	1	Deletion	Frameshift	OsKitaake02g180100
Chr2	18120186	14	Deletion	Frameshift	OsKitaake02g180300
Chr2	18220711	1	Insertion	Frameshift	OsKitaake02g181100
Chr2	18416648	3	Deletion	Inframe deletion	OsKitaake02g182400
Chr2	18417970	1	Insertion	Frameshift	OsKitaake02g182500
Chr2	18439151	3	Insertion	Splice donor	OsKitaake02g182700
Chr2	18439362	4	Insertion	Splice acceptor	OsKitaake02g182700
Chr2	18444125	1	Deletion	Frameshift	OsKitaake02g182800
Chr2	18444130	8	Deletion	Frameshift	OsKitaake02g182800
Chr2	18462583	12	Deletion	Inframe deletion	OsKitaake02g183200
Chr2	18482058	3	Deletion	Inframe deletion	OsKitaake02g183300
Chr2	18483057	12	Deletion	Inframe deletion	OsKitaake02g183300
Chr2	18483120	3	Insertion	Frameshift	OsKitaake02g183300
Chr2	18607367	1	Insertion	Frameshift	OsKitaake02g183400
Chr2	18624484	18	Insertion	Frameshift	OsKitaake02g183500
Chr2	18659063	6	Deletion	Inframe deletion	OsKitaake02g183700
Chr2	18724534	2	Insertion	Frameshift	OsKitaake02g184300
Chr2	18842106	3	Insertion	Frameshift	OsKitaake02g184800
Chr2	18876262	12	Deletion	Inframe deletion	OsKitaake02g184900
Chr2	18876370	5	Insertion	Frameshift	OsKitaake02g184900
Chr2	18891088	1	Insertion	Splice acceptor	OsKitaake02g185000
Chr2	19002670	2	Deletion	Frameshift	OsKitaake02g186101
Chr2	19556429	9	Insertion	Frameshift	OsKitaake02g191200
Chr2	19634000	3	Deletion	Inframe deletion	OsKitaake02g192000
Chr2	19653874	6	Deletion	Inframe deletion	OsKitaake02g192100
Chr2	19714727	3	Deletion	Inframe deletion	OsKitaake02g192700
Chr2	19812695	6	Deletion	Inframe deletion	OsKitaake02g193200
Chr2	19829872	12	Insertion	Frameshift	OsKitaake02g193350
Chr2	19830017	5	Insertion	Frameshift	OsKitaake02g193350
Chr2	19845261	3	Deletion	Inframe deletion	OsKitaake02g193600
Chr2	20195545	2	Deletion	Frameshift	OsKitaake02g197132
Chr2	20420709	3	Insertion	Frameshift	OsKitaake02g198900
Chr2	21352029	12	Deletion	Inframe deletion	OsKitaake02g206001
Chr2	21685195	1	Insertion	Frameshift	OsKitaake02g209980
Chr2	21698172	1	Insertion	Frameshift	OsKitaake02g210340
Chr2	21698447	2	Insertion	Frameshift	OsKitaake02g210340
Chr2	21698533	3	Insertion	Frameshift	OsKitaake02g210340
Chr2	22500054	1	Insertion	Splice acceptor	OsKitaake02g218100
Chr2	23480330	1	Insertion	Frameshift	OsKitaake02g230100
Chr2	23971902	1	Deletion	Frameshift	OsKitaake02g235350
Chr2	24014501	2	Insertion	Frameshift	OsKitaake02g235950
Chr2	24556074	1	Insertion	Frameshift	OsKitaake02g244000
Chr2	24556393	1	Insertion	Frameshift	OsKitaake02g244000
Chr2	24636389	2	Deletion	Frameshift	OsKitaake02g244900
Chr2	24765091	3	Deletion	Inframe deletion	OsKitaake02g246400
Chr2	24765557	6	Insertion	Frameshift	OsKitaake02g246400
Chr2	24770025	12	Insertion	Frameshift	OsKitaake02g246500
Chr2	24781420	1	Insertion	Frameshift	OsKitaake02g246600
Chr2	24781421	1	Insertion	Frameshift	OsKitaake02g246600
Chr2	24781422	1	Insertion	Frameshift	OsKitaake02g246600
Chr2	24781423	3	Insertion	Frameshift	OsKitaake02g246600
Chr2	24781424	1	Insertion	Frameshift	OsKitaake02g246600
Chr2	24781425	2	Insertion	Frameshift	OsKitaake02g246600
Chr2	24781426	3	Insertion	Frameshift	OsKitaake02g246600
Chr2	24781891	3	Insertion	Frameshift	OsKitaake02g246600
Chr2	24781918	3	Insertion	Frameshift	OsKitaake02g246600
Chr2	24782019	1	Deletion	Frameshift	OsKitaake02g246600
Chr2	24785434	1	Insertion	Frameshift	OsKitaake02g246700
Chr2	24785439	1	Deletion	Frameshift	OsKitaake02g246700
Chr2	24786203	1	Deletion	Frameshift	OsKitaake02g246700
Chr2	24786206	1	Insertion	Frameshift	OsKitaake02g246700
Chr2	24786373	1	Insertion	Frameshift	OsKitaake02g246700
Chr2	24786380	1	Deletion	Frameshift	OsKitaake02g246700
Chr2	24786509	2	Deletion	Frameshift	OsKitaake02g246700
Chr2	24795014	3	Insertion	Frameshift	OsKitaake02g246800
Chr2	24795185	1	Deletion	Frameshift	OsKitaake02g246800
Chr2	24795190	1	Insertion	Frameshift	OsKitaake02g246800
Chr2	24795498	2	Insertion	Frameshift	OsKitaake02g246800
Chr2	25198050	6	Deletion	Inframe deletion	OsKitaake02g248100
Chr2	25212785	20	Insertion	Splice acceptor	OsKitaake02g248300
Chr2	25401244	17	Deletion	Frameshift	OsKitaake02g250400
Chr2	26094785	2	Insertion	Frameshift	OsKitaake02g258100
Chr2	26094787	3	Insertion	Frameshift	OsKitaake02g258100
Chr2	26276842	6	Insertion	Frameshift	OsKitaake02g261450
Chr2	26316036	1	Insertion	Frameshift	OsKitaake02g262000
Chr2	26415331	1	Deletion	Frameshift	OsKitaake02g263600
Chr2	26483292	9	Deletion	Inframe deletion	OsKitaake02g264500
Chr2	26674104	1	Insertion	Frameshift	OsKitaake02g266650
Chr2	26861627	6	Deletion	Inframe deletion	OsKitaake02g268100
Chr2	26952372	3	Insertion	Frameshift	OsKitaake02g268900
Chr2	27302730	3	Deletion	Inframe deletion	OsKitaake02g274400
Chr2	27501406	6	Insertion	Splice donor	OsKitaake02g276000
Chr2	27508402	3	Deletion	Inframe deletion	OsKitaake02g276150
Chr2	28379177	26	Insertion	Splice donor	OsKitaake02g285600
Chr2	29663046	1	Insertion	Frameshift	OsKitaake02g299601
Chr2	29877240	3	Deletion	Inframe deletion	OsKitaake02g302400
Chr2	30296905	21	Deletion	Inframe deletion	OsKitaake02g308400
Chr2	30741046	3	Insertion	Frameshift	OsKitaake02g303700
Chr2	30784734	2	Insertion	Frameshift	OsKitaake02g306866
Chr2	30850892	5	Insertion	Frameshift	OsKitaake02g314700
Chr2	30850917	7	Insertion	Frameshift	OsKitaake02g314700
Chr2	30851001	10	Deletion	Frameshift	OsKitaake02g314700
Chr2	31175475	4	Insertion	Frameshift	OsKitaake02g318950
Chr2	35341530	1	Insertion	Frameshift	OsKitaake02g370548
Chr2	35341540	1	Insertion	Frameshift	OsKitaake02g370548
Chr2	35341545	1	Insertion	Frameshift	OsKitaake02g370548
Chr2	35341583	1	Insertion	Frameshift	OsKitaake02g370548
Chr2	35341608	1	Insertion	Frameshift	OsKitaake02g370548
Chr2	35345807	1	Insertion	Frameshift	OsKitaake02g370548
Chr2	36662343	2	Deletion	Frameshift	OsKitaake02g390800
Chr2	36662349	1	Deletion	Frameshift	OsKitaake02g390800
Chr2	36662355	1	Deletion	Frameshift	OsKitaake02g390800
Chr2	36662357	1	Deletion	Frameshift	OsKitaake02g390800
Chr2	37007958	3	Insertion	Frameshift	OsKitaake02g397100
Chr3	411087	2	Deletion	Frameshift	OsKitaake03g006100
Chr3	824057	1	Insertion	Frameshift	OsKitaake03g012900
Chr3	1350197	1	Deletion	Frameshift	OsKitaake03g019800
Chr3	1453236	17	Insertion	Frameshift	OsKitaake03g020600
Chr3	1763023	12	Deletion	Inframe deletion	OsKitaake03g025400
Chr3	2123454	3	Insertion	Splice donor	OsKitaake03g030500
Chr3	3100538	1	Insertion	Frameshift	OsKitaake03g043600
Chr3	5049432	1	Insertion	Frameshift	OsKitaake03g072466
Chr3	6667106	9	Insertion	Frameshift	OsKitaake03g094800
Chr3	7291282	1	Insertion	Frameshift	OsKitaake03g101700
Chr3	8383927	12	Insertion	Frameshift	OsKitaake03g115400
Chr3	8425630	1	Insertion	Frameshift	OsKitaake03g115900
Chr3	8508588	2	Insertion	Frameshift	OsKitaake03g116700
Chr3	8520534	9	Insertion	Frameshift	OsKitaake03g116800
Chr3	8535015	2	Insertion	Frameshift	OsKitaake03g116900
Chr3	8535021	1	Insertion	Frameshift	OsKitaake03g116900
Chr3	8535040	1	Deletion	Frameshift	OsKitaake03g116900
Chr3	8535044	2	Deletion	Frameshift	OsKitaake03g116900
Chr3	8535417	1	Insertion	Frameshift	OsKitaake03g116900
Chr3	8543857	16	Deletion	Frameshift	OsKitaake03g116950
Chr3	8617804	3	Deletion	Inframe deletion	OsKitaake03g118300
Chr3	9624293	1	Insertion	Frameshift	OsKitaake03g131032
Chr3	11113631	3	Deletion	Inframe deletion	OsKitaake03g152500
Chr3	11188551	5	Deletion	Frameshift	OsKitaake03g153700
Chr3	11251121	5	Insertion	Frameshift	OsKitaake03g154501
Chr3	11310738	3	Deletion	Inframe deletion	OsKitaake03g155100
Chr3	11528857	1	Insertion	Frameshift	OsKitaake03g156750
Chr3	12085759	3	Deletion	Inframe deletion	OsKitaake03g164050
Chr3	12615809	1	Deletion	Frameshift	OsKitaake03g170300
Chr3	12691948	1	Deletion	Splice acceptor	OsKitaake03g171300
Chr3	14118823	1	Insertion	Frameshift	OsKitaake03g184500
Chr3	15151797	5	Insertion	Frameshift	OsKitaake03g196600
Chr3	15153965	6	Deletion	Inframe deletion	OsKitaake03g196600
Chr3	15161089	2	Deletion	Frameshift	OsKitaake03g196700
Chr3	15161092	1	Deletion	Frameshift	OsKitaake03g196700
Chr3	15225645	6	Insertion	Frameshift	OsKitaake03g197500
Chr3	15263969	3	Insertion	Frameshift	OsKitaake03g198000
Chr3	15873752	3	Deletion	Inframe deletion	OsKitaake03g203500
Chr3	16421928	1	Deletion	Frameshift	OsKitaake03g208100
Chr3	16574627	1	Insertion	Frameshift	OsKitaake03g209500
Chr3	16574639	1	Insertion	Frameshift	OsKitaake03g209500
Chr3	16574658	2	Insertion	Frameshift	OsKitaake03g209500
Chr3	16575853	1	Insertion	Frameshift	OsKitaake03g209500
Chr3	16575886	1	Insertion	Frameshift	OsKitaake03g209500
Chr3	16582424	1	Insertion	Frameshift	OsKitaake03g209600
Chr3	16582567	1	Insertion	Frameshift	OsKitaake03g209600
Chr3	16582576	1	Insertion	Frameshift	OsKitaake03g209600
Chr3	16582721	1	Deletion	Frameshift	OsKitaake03g209700
Chr3	16582740	1	Insertion	Frameshift	OsKitaake03g209700
Chr3	16582754	1	Insertion	Frameshift	OsKitaake03g209700
Chr3	16582790	1	Deletion	Frameshift	OsKitaake03g209700
Chr3	17099572	1	Deletion	Splice donor	OsKitaake03g212500
Chr3	17369453	3	Deletion	Splice acceptor	OsKitaake03g214200
Chr3	18430611	1	Deletion	Frameshift	OsKitaake03g223800
Chr3	18537258	8	Deletion	Frameshift	OsKitaake03g224401
Chr3	19088680	2	Deletion	Frameshift	OsKitaake03g228200
Chr3	21900396	2	Insertion	Frameshift	OsKitaake03g240300
Chr3	22168635	1	Insertion	Frameshift	OsKitaake03g241635
Chr3	22931771	22	Deletion	Frameshift	OsKitaake03g248000
Chr3	23241177	3	Deletion	Inframe deletion	OsKitaake03g250100
Chr3	23338189	3	Deletion	Stop lost	OsKitaake03g251300
Chr3	23729988	6	Deletion	Inframe deletion	OsKitaake03g254900
Chr3	24738105	6	Deletion	Inframe deletion	OsKitaake03g264200
Chr3	25577156	1	Insertion	Frameshift	OsKitaake03g270300
Chr3	25957268	3	Deletion	Inframe deletion	OsKitaake03g273700
Chr3	26051064	6	Insertion	Frameshift	OsKitaake03g274400
Chr3	26101755	16	Deletion	Frameshift	OsKitaake03g274800
Chr3	26381985	1	Insertion	Frameshift	OsKitaake03g275200
Chr3	26409406	1	Deletion	Frameshift	OsKitaake03g275500
Chr3	26410237	1	Deletion	Frameshift	OsKitaake03g275500
Chr3	26423899	3	Deletion	Inframe deletion	OsKitaake03g275700
Chr3	26500670	3	Insertion	Frameshift	OsKitaake03g276800
Chr3	26855815	3	Insertion	Frameshift	OsKitaake03g179800
Chr3	26922866	15	Insertion	Frameshift	OsKitaake03g180500
Chr3	26922867	1	Insertion	Frameshift	OsKitaake03g180500
Chr3	26923106	6	Deletion	Splice acceptor	OsKitaake03g180400
Chr3	26923192	2	Deletion	Splice acceptor	OsKitaake03g180400
Chr3	27109523	10	Deletion	Frameshift	OsKitaake03g279300
Chr3	27109535	1	Deletion	Frameshift	OsKitaake03g279300
Chr3	27200079	1	Insertion	Frameshift	OsKitaake03g280200
Chr3	28213041	1	Insertion	Frameshift	OsKitaake03g291550
Chr3	28544662	1	Insertion	Frameshift	OsKitaake03g296100
Chr3	29611911	1	Insertion	Frameshift	OsKitaake03g308733
Chr3	31345268	5	Insertion	Frameshift	OsKitaake03g330200
Chr3	32616463	1	Deletion	Frameshift	OsKitaake03g345300
Chr3	32616473	1	Insertion	Frameshift	OsKitaake03g345300
Chr3	33112072	2	Deletion	Frameshift	OsKitaake03g353450
Chr3	33419498	1	Insertion	Frameshift	OsKitaake03g357200
Chr3	35314672	1	Insertion	Frameshift	OsKitaake03g387000
Chr3	35314748	1	Insertion	Frameshift	OsKitaake03g387000
Chr3	35664607	1	Insertion	Splice donor	OsKitaake03g391500
Chr4	104139	1	Insertion	Frameshift	OsKitaake04g000300
Chr4	383197	1	Deletion	Frameshift	OsKitaake04g002400
Chr4	383304	1	Insertion	Frameshift	OsKitaake04g002400
Chr4	383307	1	Deletion	Frameshift	OsKitaake04g002400
Chr4	383357	1	Insertion	Frameshift	OsKitaake04g002400
Chr4	383360	1	Deletion	Frameshift	OsKitaake04g002400
Chr4	434560	1	Insertion	Frameshift	OsKitaake04g003100
Chr4	584778	1	Insertion	Frameshift	OsKitaake04g004300
Chr4	584784	1	Insertion	Frameshift	OsKitaake04g004300
Chr4	673771	2	Deletion	Frameshift	OsKitaake04g005400
Chr4	719752	3	Deletion	Inframe deletion	OsKitaake04g005800
Chr4	917458	3	Deletion	Inframe deletion	OsKitaake04g006900
Chr4	944498	3	Deletion	Inframe deletion	OsKitaake04g007200
Chr4	973524	5	Insertion	Frameshift	OsKitaake04g007400
Chr4	1039907	1	Insertion	Frameshift	OsKitaake04g008100
Chr4	1110483	1	Insertion	Frameshift	OsKitaake04g008700
Chr4	1110486	9	Insertion	Frameshift	OsKitaake04g008700
Chr4	1110487	3	Insertion	Frameshift	OsKitaake04g008700
Chr4	1210218	1	Insertion	Frameshift	OsKitaake04g009600
Chr4	1210289	1	Deletion	Frameshift	OsKitaake04g009600
Chr4	1859174	1	Insertion	Frameshift	OsKitaake04g012400
Chr4	1859251	1	Deletion	Frameshift	OsKitaake04g012400
Chr4	2411058	1	Insertion	Frameshift	OsKitaake04g014900
Chr4	2411066	1	Insertion	Frameshift	OsKitaake04g014900
Chr4	2411095	1	Insertion	Frameshift	OsKitaake04g014900
Chr4	2411206	1	Deletion	Frameshift	OsKitaake04g014900
Chr4	2411262	1	Insertion	Frameshift	OsKitaake04g014900
Chr4	2411297	1	Insertion	Frameshift	OsKitaake04g014900
Chr4	2411329	1	Insertion	Frameshift	OsKitaake04g014900
Chr4	2411352	1	Insertion	Frameshift	OsKitaake04g014900
Chr4	2510968	1	Insertion	Frameshift	OsKitaake04g015300
Chr4	4017950	6	Insertion	Splice donor	OsKitaake04g019500
Chr4	4036602	5	Deletion	Frameshift	OsKitaake04g019650
Chr4	4036632	1	Insertion	Frameshift	OsKitaake04g019650
Chr4	4036636	1	Insertion	Frameshift	OsKitaake04g019650
Chr4	4036683	2	Deletion	Frameshift	OsKitaake04g019650
Chr4	4036755	1	Deletion	Frameshift	OsKitaake04g019650
Chr4	4036766	5	Insertion	Frameshift	OsKitaake04g019650
Chr4	4036767	2	Insertion	Frameshift	OsKitaake04g019650
Chr4	4042792	6	Insertion	Splice acceptor	OsKitaake04g019700
Chr4	4042793	1	Insertion	Splice acceptor	OsKitaake04g019700
Chr4	4166313	4	Insertion	Frameshift	OsKitaake04g020200
Chr4	4167533	3	Insertion	Frameshift	OsKitaake04g020200
Chr4	4168000	12	Insertion	Frameshift	OsKitaake04g020200
Chr4	4175915	3	Deletion	Splice donor	OsKitaake04g020300
Chr4	4191571	1	Insertion	Frameshift	OsKitaake04g020400
Chr4	4191580	1	Insertion	Frameshift	OsKitaake04g020400
Chr4	4191584	1	Insertion	Frameshift	OsKitaake04g020400
Chr4	4191590	1	Insertion	Frameshift	OsKitaake04g020400
Chr4	4191596	1	Insertion	Frameshift	OsKitaake04g020400
Chr4	4191604	1	Insertion	Frameshift	OsKitaake04g020400
Chr4	4196883	7	Deletion	Frameshift	OsKitaake04g020500
Chr4	4197715	24	Insertion	Frameshift	OsKitaake04g020500
Chr4	4197716	3	Insertion	Frameshift	OsKitaake04g020500
Chr4	4210667	3	Insertion	Frameshift	OsKitaake04g020600
Chr4	4232641	1	Insertion	Frameshift	OsKitaake04g020700
Chr4	4232647	1	Deletion	Frameshift	OsKitaake04g020700
Chr4	4241928	1	Deletion	Frameshift	OsKitaake04g020800
Chr4	4242299	3	Deletion	Inframe deletion	OsKitaake04g020800
Chr4	4256436	3	Insertion	Frameshift	OsKitaake04g021000
Chr4	4256437	1	Insertion	Frameshift	OsKitaake04g021000
Chr4	4256982	3	Deletion	Inframe deletion	OsKitaake04g021000
Chr4	4257933	4	Deletion	Frameshift	OsKitaake04g021000
Chr4	4257939	2	Deletion	Frameshift	OsKitaake04g021000
Chr4	4257958	2	Deletion	Frameshift	OsKitaake04g021000
Chr4	4257961	1	Deletion	Frameshift	OsKitaake04g021000
Chr4	4258389	3	Deletion	Inframe deletion	OsKitaake04g021000
Chr4	4279553	8	Deletion	Frameshift	OsKitaake04g021150
Chr4	4279757	10	Deletion	Frameshift	OsKitaake04g021150
Chr4	4299829	33	Insertion	Frameshift	OsKitaake04g021300
Chr4	4299871	1	Deletion	Frameshift	OsKitaake04g021300
Chr4	4299948	1	Deletion	Frameshift	OsKitaake04g021300
Chr4	4299960	1	Deletion	Frameshift	OsKitaake04g021300
Chr4	4299973	1	Deletion	Frameshift	OsKitaake04g021300
Chr4	4299976	1	Deletion	Frameshift	OsKitaake04g021300
Chr4	4299981	1	Deletion	Frameshift	OsKitaake04g021300
Chr4	4587939	42	Deletion	Inframe deletion	OsKitaake04g021850
Chr4	4898868	3	Insertion	Frameshift	OsKitaake04g022300
Chr4	4898888	9	Insertion	Frameshift	OsKitaake04g022300
Chr4	4899021	5	Insertion	Frameshift	OsKitaake04g022300
Chr4	4899022	4	Insertion	Frameshift	OsKitaake04g022300
Chr4	5356974	1	Deletion	Frameshift	OsKitaake04g026000
Chr4	5357067	1	Insertion	Frameshift	OsKitaake04g026000
Chr4	5751528	2	Insertion	Frameshift	OsKitaake04g028100
Chr4	5751543	2	Deletion	Frameshift	OsKitaake04g028100
Chr4	5803504	1	Insertion	Frameshift	OsKitaake04g028300
Chr4	5803804	1	Deletion	Frameshift	OsKitaake04g028300
Chr4	5803821	1	Deletion	Frameshift	OsKitaake04g028300
Chr4	5803827	1	Deletion	Frameshift	OsKitaake04g028300
Chr4	5882558	1	Deletion	Frameshift	OsKitaake04g029400
Chr4	6509228	1	Insertion	Frameshift	OsKitaake04g032950
Chr4	6598816	1	Insertion	Frameshift	OsKitaake04g033500
Chr4	6789923	1	Insertion	Frameshift	OsKitaake04g034601
Chr4	7166419	1	Deletion	Frameshift	OsKitaake04g036300
Chr4	7166427	1	Deletion	Frameshift	OsKitaake04g036300
Chr4	7402053	1	Insertion	Frameshift	OsKitaake04g037600
Chr4	7646855	3	Insertion	Frameshift	OsKitaake04g038400
Chr4	7660472	9	Deletion	Inframe deletion	OsKitaake04g038500
Chr4	7700697	1	Insertion	Frameshift	OsKitaake04g038900
Chr4	7702006	3	Insertion	Frameshift	OsKitaake04g038900
Chr4	7827937	1	Insertion	Frameshift	OsKitaake04g040000
Chr4	7828037	17	Deletion	Frameshift	OsKitaake04g040000
Chr4	9224415	1	Insertion	Frameshift	OsKitaake04g047400
Chr4	10080902	1	Deletion	Frameshift	OsKitaake04g054100
Chr4	10080914	1	Deletion	Frameshift	OsKitaake04g054100
Chr4	10082757	1	Deletion	Frameshift	OsKitaake04g054100
Chr4	10082773	1	Deletion	Frameshift	OsKitaake04g054100
Chr4	10082782	1	Deletion	Frameshift	OsKitaake04g054100
Chr4	10082793	1	Insertion	Frameshift	OsKitaake04g054100
Chr4	10260362	3	Insertion	Frameshift	OsKitaake04g054700
Chr4	12048079	1	Deletion	Frameshift	OsKitaake04g058200
Chr4	12079061	1	Insertion	Splice acceptor	OsKitaake04g058400
Chr4	12079071	1	Insertion	Splice donor	OsKitaake04g058400
Chr4	12079081	1	Insertion	Splice acceptor	OsKitaake04g058400
Chr4	12079090	1	Insertion	Splice donor	OsKitaake04g058400
Chr4	12079092	1	Insertion	Splice donor	OsKitaake04g058400
Chr4	12146173	1	Insertion	Frameshift	OsKitaake04g058950
Chr4	12707611	1	Insertion	Frameshift	OsKitaake04g209500
Chr4	12707619	1	Insertion	Frameshift	OsKitaake04g209500
Chr4	12707620	1	Insertion	Frameshift	OsKitaake04g209500
Chr4	12707628	1	Insertion	Frameshift	OsKitaake04g209500
Chr4	12707632	2	Insertion	Frameshift	OsKitaake04g209500
Chr4	12707649	1	Insertion	Splice acceptor	OsKitaake04g209500
Chr4	12719260	1	Deletion	Frameshift	OsKitaake04g209700
Chr4	12846355	1	Deletion	Frameshift	OsKitaake04g061200
Chr4	13189585	1	Insertion	Frameshift	OsKitaake04g062400
Chr4	13337978	1	Insertion	Frameshift	OsKitaake04g063400
Chr4	13481004	1	Insertion	Frameshift	OsKitaake04g064600
Chr4	13481009	1	Insertion	Frameshift	OsKitaake04g064600
Chr4	14187069	1	Insertion	Frameshift	OsKitaake04g067900
Chr4	14187076	1	Insertion	Frameshift	OsKitaake04g067900
Chr4	14498579	1	Insertion	Frameshift	OsKitaake04g068600
Chr4	14498591	1	Deletion	Frameshift	OsKitaake04g068600
Chr4	14498652	3	Deletion	Inframe deletion	OsKitaake04g068600
Chr4	14840577	1	Insertion	Frameshift	OsKitaake04g070300
Chr4	14840588	1	Insertion	Frameshift	OsKitaake04g070300
Chr4	14840600	1	Insertion	Frameshift	OsKitaake04g070300
Chr4	14840606	1	Insertion	Frameshift	OsKitaake04g070300
Chr4	15121467	8	Deletion	Frameshift	OsKitaake04g072300
Chr4	15228122	1	Deletion	Frameshift	OsKitaake04g073150
Chr4	15301776	1	Deletion	Frameshift	OsKitaake04g073400
Chr4	15301801	1	Deletion	Splice donor	OsKitaake04g073400
Chr4	15499536	1	Insertion	Frameshift	OsKitaake04g074800
Chr4	15785136	1	Deletion	Frameshift	OsKitaake04g077400
Chr4	15785160	1	Deletion	Frameshift	OsKitaake04g077400
Chr4	15785195	1	Deletion	Frameshift	OsKitaake04g077400
Chr4	15785197	1	Deletion	Frameshift	OsKitaake04g077400
Chr4	15785205	1	Deletion	Frameshift	OsKitaake04g077400
Chr4	15785212	1	Deletion	Frameshift	OsKitaake04g077400
Chr4	15785217	1	Deletion	Frameshift	OsKitaake04g077400
Chr4	15785223	1	Deletion	Frameshift	OsKitaake04g077400
Chr4	15785226	3	Deletion	Inframe deletion	OsKitaake04g077400
Chr4	15785230	1	Deletion	Frameshift	OsKitaake04g077400
Chr4	15785236	2	Deletion	Frameshift	OsKitaake04g077400
Chr4	15785250	1	Deletion	Frameshift	OsKitaake04g077400
Chr4	17076567	1	Insertion	Frameshift	OsKitaake04g083350
Chr4	17116787	1	Deletion	Frameshift	OsKitaake04g083450
Chr4	17116860	1	Deletion	Frameshift	OsKitaake04g083450
Chr4	17194623	2	Insertion	Frameshift	OsKitaake04g084101
Chr4	17256050	1	Insertion	Frameshift	OsKitaake04g084600
Chr4	17256069	1	Insertion	Frameshift	OsKitaake04g084600
Chr4	17256144	1	Insertion	Frameshift	OsKitaake04g084600
Chr4	17256233	1	Insertion	Frameshift	OsKitaake04g084600
Chr4	17362057	3	Insertion	Frameshift	OsKitaake04g085500
Chr4	17372105	1	Deletion	Frameshift	OsKitaake04g085550
Chr4	17372226	1	Deletion	Frameshift	OsKitaake04g085550
Chr4	17372772	1	Deletion	Frameshift	OsKitaake04g085550
Chr4	17372775	1	Deletion	Frameshift	OsKitaake04g085550
Chr4	17376312	3	Deletion	Inframe deletion	OsKitaake04g085600
Chr4	17379430	51	Deletion	Frameshift	OsKitaake04g085600
Chr4	17437441	1	Insertion	Frameshift	OsKitaake04g086300
Chr4	17437463	1	Insertion	Frameshift	OsKitaake04g086300
Chr4	17437484	1	Deletion	Frameshift	OsKitaake04g086300
Chr4	17437543	1	Deletion	Frameshift	OsKitaake04g086300
Chr4	17437574	1	Insertion	Frameshift	OsKitaake04g086300
Chr4	17437577	1	Deletion	Frameshift	OsKitaake04g086300
Chr4	17494801	1	Deletion	Frameshift	OsKitaake04g087100
Chr4	17528966	1	Deletion	Frameshift	OsKitaake04g087300
Chr4	17529008	1	Deletion	Frameshift	OsKitaake04g087300
Chr4	17529098	1	Deletion	Frameshift	OsKitaake04g087300
Chr4	17611866	12	Deletion	Inframe deletion	OsKitaake04g088100
Chr4	18105112	1	Deletion	Frameshift	OsKitaake04g091200
Chr4	18105115	1	Deletion	Frameshift	OsKitaake04g091200
Chr4	18737271	1	Insertion	Frameshift	OsKitaake04g093800
Chr4	18737288	3	Insertion	Frameshift	OsKitaake04g093800
Chr4	18738276	6	Deletion	Inframe deletion	OsKitaake04g093800
Chr4	18752424	27	Insertion	Frameshift	OsKitaake04g094000
Chr4	18778240	8	Deletion	Splice acceptor	OsKitaake04g094250
Chr4	18812646	2	Deletion	Frameshift	OsKitaake04g094400
Chr4	18812901	3	Insertion	Frameshift	OsKitaake04g094400
Chr4	18956043	1	Insertion	Frameshift	OsKitaake04g095100
Chr4	18956052	1	Deletion	Frameshift	OsKitaake04g095100
Chr4	18956282	6	Insertion	Frameshift	OsKitaake04g095100
Chr4	18956284	3	Insertion	Frameshift	OsKitaake04g095100
Chr4	18956397	6	Deletion	Inframe deletion	OsKitaake04g095100
Chr4	18956485	3	Insertion	Frameshift	OsKitaake04g095100
Chr4	18956512	3	Insertion	Frameshift	OsKitaake04g095100
Chr4	18956686	1	Insertion	Frameshift	OsKitaake04g095100
Chr4	18956687	1	Insertion	Frameshift	OsKitaake04g095100
Chr4	18956689	1	Insertion	Frameshift	OsKitaake04g095100
Chr4	19061108	4	Insertion	Frameshift	OsKitaake04g096100
Chr4	19096719	1	Insertion	Frameshift	OsKitaake04g096600
Chr4	19255709	1	Insertion	Frameshift	OsKitaake04g097900
Chr4	19319027	2	Insertion	Frameshift	OsKitaake04g098300
Chr4	19391904	2	Deletion	Frameshift	OsKitaake04g099100
Chr4	19391909	2	Deletion	Frameshift	OsKitaake04g099100
Chr4	19391915	1	Deletion	Frameshift	OsKitaake04g099100
Chr4	19450604	1	Deletion	Frameshift	OsKitaake04g099700
Chr4	19450610	1	Deletion	Frameshift	OsKitaake04g099700
Chr4	19450670	1	Deletion	Frameshift	OsKitaake04g099700
Chr4	19450685	1	Insertion	Frameshift	OsKitaake04g099700
Chr4	19698159	2	Deletion	Frameshift	OsKitaake04g102600
Chr4	19865399	1	Insertion	Frameshift	OsKitaake04g103700
Chr4	19865549	1	Insertion	Frameshift	OsKitaake04g103700
Chr4	19865556	1	Insertion	Frameshift	OsKitaake04g103700
Chr4	19883124	1	Insertion	Frameshift	OsKitaake04g104001
Chr4	19939668	2	Deletion	Frameshift	OsKitaake04g104200
Chr4	19939675	1	Deletion	Frameshift	OsKitaake04g104200
Chr4	19939687	1	Deletion	Frameshift	OsKitaake04g104200
Chr4	19939693	1	Deletion	Frameshift	OsKitaake04g104200
Chr4	19939702	1	Deletion	Frameshift	OsKitaake04g104200
Chr4	19939707	1	Deletion	Frameshift	OsKitaake04g104200
Chr4	19939714	1	Deletion	Frameshift	OsKitaake04g104200
Chr4	19939718	1	Deletion	Frameshift	OsKitaake04g104200
Chr4	19939759	1	Deletion	Frameshift	OsKitaake04g104200
Chr4	19939792	2	Deletion	Frameshift	OsKitaake04g104200
Chr4	19939797	1	Deletion	Frameshift	OsKitaake04g104200
Chr4	19939844	1	Deletion	Frameshift	OsKitaake04g104200
Chr4	19939849	1	Deletion	Frameshift	OsKitaake04g104200
Chr4	19939871	1	Deletion	Frameshift	OsKitaake04g104200
Chr4	19939884	1	Deletion	Frameshift	OsKitaake04g104200
Chr4	19939892	1	Deletion	Frameshift	OsKitaake04g104200
Chr4	19939896	1	Deletion	Frameshift	OsKitaake04g104200
Chr4	19939907	1	Deletion	Frameshift	OsKitaake04g104200
Chr4	19939911	1	Deletion	Frameshift	OsKitaake04g104200
Chr4	19940698	1	Insertion	Frameshift	OsKitaake04g104200
Chr4	19940708	1	Insertion	Frameshift	OsKitaake04g104200
Chr4	20000924	1	Insertion	Frameshift	OsKitaake04g104800
Chr4	20026763	1	Deletion	Frameshift	OsKitaake04g105300
Chr4	20149117	1	Deletion	Frameshift	OsKitaake04g106300
Chr4	20162596	1	Insertion	Frameshift	OsKitaake04g106500
Chr4	20246634	1	Insertion	Frameshift	OsKitaake04g107400
Chr4	20255893	1	Insertion	Frameshift	OsKitaake04g107600
Chr4	20255991	1	Insertion	Frameshift	OsKitaake04g107600
Chr4	20302623	1	Insertion	Frameshift	OsKitaake04g108000
Chr4	20302673	1	Deletion	Frameshift	OsKitaake04g108000
Chr4	20302679	1	Deletion	Frameshift	OsKitaake04g108000
Chr4	20302712	1	Deletion	Frameshift	OsKitaake04g108000
Chr4	20328701	1	Deletion	Frameshift	OsKitaake04g108750
Chr4	20328709	1	Deletion	Frameshift	OsKitaake04g108750
Chr4	20328719	2	Deletion	Frameshift	OsKitaake04g108750
Chr4	20328733	1	Deletion	Frameshift	OsKitaake04g108750
Chr4	20328854	1	Insertion	Frameshift	OsKitaake04g108750
Chr4	20328859	1	Deletion	Frameshift	OsKitaake04g108750
Chr4	20385511	1	Insertion	Frameshift	OsKitaake04g109300
Chr4	20628013	6	Insertion	Frameshift	OsKitaake04g111300
Chr4	20633107	3	Deletion	Inframe deletion	OsKitaake04g111400
Chr4	20847037	3	Deletion	Inframe deletion	OsKitaake04g113400
Chr4	21035335	11	Deletion	Frameshift	OsKitaake04g115300
Chr4	21246234	3	Deletion	Inframe deletion	OsKitaake04g117400
Chr4	21275071	9	Insertion	Frameshift	OsKitaake04g117700
Chr4	21280651	9	Insertion	Splice acceptor	OsKitaake04g117800
Chr4	21340343	1	Deletion	Frameshift	OsKitaake04g118600
Chr4	21340349	1	Deletion	Frameshift	OsKitaake04g118600
Chr4	21340361	1	Deletion	Frameshift	OsKitaake04g118600
Chr4	21430195	1	Deletion	Frameshift	OsKitaake04g119700
Chr4	21698159	1	Insertion	Frameshift	OsKitaake04g123600
Chr4	21698168	1	Deletion	Frameshift	OsKitaake04g123600
Chr4	21698171	1	Deletion	Frameshift	OsKitaake04g123600
Chr4	21698179	1	Insertion	Frameshift	OsKitaake04g123600
Chr4	21698189	1	Insertion	Frameshift	OsKitaake04g123600
Chr4	21698194	1	Insertion	Frameshift	OsKitaake04g123600
Chr4	21698242	1	Insertion	Frameshift	OsKitaake04g123600
Chr4	21749366	3	Insertion	Splice acceptor	OsKitaake04g124100
Chr4	21795454	3	Insertion	Frameshift	OsKitaake04g124700
Chr4	21795471	1	Insertion	Frameshift	OsKitaake04g124700
Chr4	21795474	1	Deletion	Frameshift	OsKitaake04g124700
Chr4	21795487	1	Deletion	Frameshift	OsKitaake04g124700
Chr4	21795501	1	Insertion	Frameshift	OsKitaake04g124700
Chr4	21795521	3	Deletion	Inframe deletion	OsKitaake04g124700
Chr4	21804014	21	Deletion	Inframe deletion	OsKitaake04g124800
Chr4	21811353	32	Deletion	Frameshift	OsKitaake04g125000
Chr4	21811515	5	Insertion	Frameshift	OsKitaake04g125000
Chr4	21811606	6	Insertion	Frameshift	OsKitaake04g125000
Chr4	21989908	1	Deletion	Frameshift	OsKitaake04g127900
Chr4	22012732	1	Insertion	Splice donor	OsKitaake04g128300
Chr4	22013346	1	Insertion	Frameshift	OsKitaake04g128300
Chr4	22013416	1	Deletion	Frameshift	OsKitaake04g128300
Chr4	22034348	1	Deletion	Frameshift	OsKitaake04g128400
Chr4	22034359	1	Deletion	Frameshift	OsKitaake04g128400
Chr4	22034366	1	Deletion	Frameshift	OsKitaake04g128400
Chr4	22034376	1	Deletion	Frameshift	OsKitaake04g128400
Chr4	22034430	1	Deletion	Frameshift	OsKitaake04g128400
Chr4	22034433	1	Deletion	Frameshift	OsKitaake04g128400
Chr4	22034481	1	Deletion	Frameshift	OsKitaake04g128400
Chr4	22034502	1	Deletion	Frameshift	OsKitaake04g128400
Chr4	22034530	1	Deletion	Frameshift	OsKitaake04g128400
Chr4	22034571	1	Deletion	Frameshift	OsKitaake04g128400
Chr4	22034574	1	Deletion	Frameshift	OsKitaake04g128400
Chr4	22034579	1	Deletion	Frameshift	OsKitaake04g128400
Chr4	22034592	1	Deletion	Frameshift	OsKitaake04g128400
Chr4	22034606	1	Deletion	Frameshift	OsKitaake04g128400
Chr4	22034611	1	Deletion	Frameshift	OsKitaake04g128400
Chr4	22034616	1	Insertion	Frameshift	OsKitaake04g128400
Chr4	22034625	1	Deletion	Frameshift	OsKitaake04g128400
Chr4	22034628	1	Deletion	Frameshift	OsKitaake04g128400
Chr4	22034637	2	Deletion	Frameshift	OsKitaake04g128400
Chr4	22034652	1	Deletion	Frameshift	OsKitaake04g128400
Chr4	22034655	1	Deletion	Frameshift	OsKitaake04g128400
Chr4	22034664	1	Deletion	Frameshift	OsKitaake04g128400
Chr4	22034669	1	Deletion	Frameshift	OsKitaake04g128400
Chr4	22034672	1	Deletion	Frameshift	OsKitaake04g128400
Chr4	22034678	1	Deletion	Frameshift	OsKitaake04g128400
Chr4	22034684	1	Deletion	Frameshift	OsKitaake04g128400
Chr4	22034688	1	Deletion	Frameshift	OsKitaake04g128400
Chr4	22034691	1	Deletion	Frameshift	OsKitaake04g128400
Chr4	22034695	2	Deletion	Frameshift	OsKitaake04g128400
Chr4	22034698	1	Deletion	Frameshift	OsKitaake04g128400
Chr4	22034703	1	Deletion	Frameshift	OsKitaake04g128400
Chr4	22034706	1	Deletion	Frameshift	OsKitaake04g128400
Chr4	22034718	1	Deletion	Frameshift	OsKitaake04g128400
Chr4	22040665	42	Insertion	Frameshift	OsKitaake04g128500
Chr4	22370977	1	Insertion	Frameshift	OsKitaake04g130900
Chr4	22370984	1	Insertion	Frameshift	OsKitaake04g130900
Chr4	22591061	8	Deletion	Frameshift	OsKitaake04g133900
Chr4	23512864	1	Insertion	Frameshift	OsKitaake04g146600
Chr4	23594336	1	Insertion	Frameshift	OsKitaake04g148300
Chr4	23594338	1	Insertion	Frameshift	OsKitaake04g148300
Chr4	23967763	1	Deletion	Frameshift	OsKitaake04g151500
Chr4	24027628	1	Deletion	Frameshift	OsKitaake04g152701
Chr4	24090502	1	Insertion	Frameshift	OsKitaake04g153801
Chr4	24090626	1	Insertion	Frameshift	OsKitaake04g153801
Chr4	24128341	1	Insertion	Frameshift	OsKitaake04g154550
Chr4	24328830	1	Insertion	Frameshift	OsKitaake04g157100
Chr4	24328836	1	Insertion	Frameshift	OsKitaake04g157100
Chr4	24328841	1	Insertion	Frameshift	OsKitaake04g157100
Chr4	24328852	1	Insertion	Frameshift	OsKitaake04g157100
Chr4	24328855	1	Insertion	Frameshift	OsKitaake04g157100
Chr4	24328868	2	Insertion	Frameshift	OsKitaake04g157100
Chr4	24328877	1	Insertion	Frameshift	OsKitaake04g157100
Chr4	24328882	1	Insertion	Frameshift	OsKitaake04g157100
Chr4	24529545	1	Insertion	Splice acceptor	OsKitaake04g160300
Chr4	24691163	1	Insertion	Frameshift	OsKitaake04g162100
Chr4	24738779	6	Deletion	Inframe deletion	OsKitaake04g163000
Chr4	24810671	3	Deletion	Inframe deletion	OsKitaake04g163800
Chr4	24882447	1	Deletion	Frameshift	OsKitaake04g165500
Chr4	25074347	6	Deletion	Inframe deletion	OsKitaake04g168300
Chr4	25212149	1	Insertion	Frameshift	OsKitaake04g170250
Chr4	25212167	1	Insertion	Frameshift	OsKitaake04g170250
Chr4	25539840	1	Deletion	Frameshift	OsKitaake04g175966
Chr4	26642485	1	Deletion	Frameshift	OsKitaake04g192000
Chr4	26642500	1	Deletion	Frameshift	OsKitaake04g192000
Chr4	26642513	1	Deletion	Frameshift	OsKitaake04g192000
Chr4	26642521	1	Deletion	Frameshift	OsKitaake04g192000
Chr4	26642541	1	Deletion	Frameshift	OsKitaake04g192000
Chr4	26642557	1	Deletion	Frameshift	OsKitaake04g192000
Chr4	26642583	2	Deletion	Frameshift	OsKitaake04g192000
Chr4	26642616	1	Insertion	Frameshift	OsKitaake04g192000
Chr4	26642625	1	Deletion	Frameshift	OsKitaake04g192000
Chr4	26642627	1	Deletion	Frameshift	OsKitaake04g192000
Chr4	26796715	3	Insertion	Frameshift	OsKitaake04g193600
Chr4	27120142	1	Deletion	Frameshift	OsKitaake04g197200
Chr4	27120149	1	Deletion	Frameshift	OsKitaake04g197200
Chr4	27120168	1	Deletion	Frameshift	OsKitaake04g197200
Chr4	27122799	1	Insertion	Frameshift	OsKitaake04g197300
Chr4	27122815	1	Insertion	Frameshift	OsKitaake04g197300
Chr4	27731294	1	Insertion	Frameshift	OsKitaake04g204000
Chr4	27731297	1	Insertion	Frameshift	OsKitaake04g204000
Chr4	27731303	1	Insertion	Frameshift	OsKitaake04g204000
Chr4	27731306	1	Insertion	Frameshift	OsKitaake04g204000
Chr4	27731309	1	Insertion	Frameshift	OsKitaake04g204000
Chr4	27731317	1	Insertion	Frameshift	OsKitaake04g204000
Chr4	27731318	1	Insertion	Frameshift	OsKitaake04g204000
Chr4	27731319	1	Insertion	Frameshift	OsKitaake04g204000
Chr4	27731320	1	Insertion	Frameshift	OsKitaake04g204000
Chr4	27731341	1	Deletion	Frameshift	OsKitaake04g204000
Chr4	27731366	1	Deletion	Frameshift	OsKitaake04g204000
Chr4	28631796	1	Insertion	Frameshift	OsKitaake04g214300
Chr4	28631803	1	Deletion	Frameshift	OsKitaake04g214300
Chr4	29010087	1	Deletion	Frameshift	OsKitaake04g218700
Chr4	29217085	1	Insertion	Frameshift	OsKitaake04g221550
Chr4	29235111	1	Deletion	Frameshift	OsKitaake04g221700
Chr4	29235326	2	Insertion	Frameshift	OsKitaake04g221700
Chr4	29439759	1	Deletion	Frameshift	OsKitaake04g225500
Chr4	29440300	1	Insertion	Frameshift	OsKitaake04g225500
Chr4	29440375	1	Insertion	Frameshift	OsKitaake04g225500
Chr4	29440410	1	Insertion	Frameshift	OsKitaake04g225500
Chr4	29440436	1	Insertion	Frameshift	OsKitaake04g225500
Chr4	29440441	1	Insertion	Frameshift	OsKitaake04g225500
Chr4	29440447	1	Insertion	Frameshift	OsKitaake04g225500
Chr4	29501338	1	Insertion	Frameshift	OsKitaake04g226200
Chr4	29573657	1	Insertion	Frameshift	OsKitaake04g226800
Chr4	29574893	1	Deletion	Frameshift	OsKitaake04g226900
Chr4	29585565	1	Insertion	Frameshift	OsKitaake04g227100
Chr4	29585568	1	Deletion	Frameshift	OsKitaake04g227100
Chr4	29709925	1	Deletion	Frameshift	OsKitaake04g228200
Chr4	29710037	1	Insertion	Frameshift	OsKitaake04g228200
Chr4	29890706	1	Insertion	Frameshift	OsKitaake04g229600
Chr4	29890711	1	Insertion	Frameshift	OsKitaake04g229600
Chr4	30170137	9	Deletion	Inframe deletion	OsKitaake04g232000
Chr4	30289518	34	Deletion	Frameshift	OsKitaake04g233201
Chr4	30289553	3	Deletion	Inframe deletion	OsKitaake04g233201
Chr4	30289558	1	Deletion	Frameshift	OsKitaake04g233201
Chr4	30289579	1	Insertion	Frameshift	OsKitaake04g233201
Chr4	30289584	1	Insertion	Frameshift	OsKitaake04g233201
Chr4	30289590	1	Insertion	Frameshift	OsKitaake04g233201
Chr4	30289599	1	Insertion	Frameshift	OsKitaake04g233201
Chr4	30289621	1	Insertion	Frameshift	OsKitaake04g233201
Chr4	30289629	1	Insertion	Frameshift	OsKitaake04g233201
Chr4	30289630	1	Insertion	Frameshift	OsKitaake04g233201
Chr4	30289665	1	Insertion	Frameshift	OsKitaake04g233201
Chr4	30290095	1	Insertion	Frameshift	OsKitaake04g233201
Chr4	30290104	1	Insertion	Frameshift	OsKitaake04g233201
Chr4	30290142	1	Insertion	Frameshift	OsKitaake04g233201
Chr4	30378269	1	Deletion	Frameshift	OsKitaake04g233800
Chr4	30378290	1	Insertion	Frameshift	OsKitaake04g233800
Chr4	30378293	1	Deletion	Frameshift	OsKitaake04g233800
Chr4	30378310	1	Deletion	Frameshift	OsKitaake04g233800
Chr4	30476085	1	Deletion	Frameshift	OsKitaake04g235100
Chr4	30476090	1	Deletion	Frameshift	OsKitaake04g235100
Chr4	30476129	1	Deletion	Frameshift	OsKitaake04g235100
Chr4	30476153	1	Deletion	Frameshift	OsKitaake04g235100
Chr4	30476156	1	Deletion	Frameshift	OsKitaake04g235100
Chr4	30476161	1	Deletion	Frameshift	OsKitaake04g235100
Chr4	30476175	1	Deletion	Frameshift	OsKitaake04g235100
Chr4	30594070	1	Insertion	Frameshift	OsKitaake04g235900
Chr4	30594080	1	Insertion	Frameshift	OsKitaake04g235900
Chr4	30594088	1	Insertion	Frameshift	OsKitaake04g235900
Chr4	30594106	1	Insertion	Frameshift	OsKitaake04g235900
Chr4	30664312	1	Deletion	Frameshift	OsKitaake04g236600
Chr4	30731749	1	Deletion	Frameshift	OsKitaake04g237100
Chr4	30731759	1	Deletion	Frameshift	OsKitaake04g237100
Chr4	30736629	1	Insertion	Frameshift	OsKitaake04g237200
Chr4	30756611	1	Insertion	Frameshift	OsKitaake04g237500
Chr4	30756642	1	Deletion	Frameshift	OsKitaake04g237500
Chr4	30756650	1	Insertion	Frameshift	OsKitaake04g237500
Chr4	31013886	1	Deletion	Frameshift	OsKitaake04g241000
Chr4	31014154	1	Insertion	Frameshift	OsKitaake04g241000
Chr4	31014157	1	Insertion	Frameshift	OsKitaake04g241000
Chr4	31014165	1	Insertion	Frameshift	OsKitaake04g241000
Chr4	31016745	1	Insertion	Frameshift	OsKitaake04g241100
Chr4	31016748	1	Insertion	Frameshift	OsKitaake04g241100
Chr4	31016752	1	Insertion	Frameshift	OsKitaake04g241100
Chr4	31016755	1	Insertion	Frameshift	OsKitaake04g241100
Chr4	31016892	1	Insertion	Frameshift	OsKitaake04g241100
Chr4	31016895	1	Insertion	Frameshift	OsKitaake04g241100
Chr4	31016898	1	Insertion	Frameshift	OsKitaake04g241100
Chr4	31016901	1	Insertion	Frameshift	OsKitaake04g241100
Chr4	31041579	1	Deletion	Frameshift	OsKitaake04g241300
Chr4	31041593	1	Deletion	Frameshift	OsKitaake04g241300
Chr4	31078991	1	Insertion	Frameshift	OsKitaake04g241800
Chr4	31078995	1	Insertion	Frameshift	OsKitaake04g241800
Chr4	31079015	1	Insertion	Frameshift	OsKitaake04g241800
Chr4	31087148	1	Deletion	Frameshift	OsKitaake04g242000
Chr4	31087161	1	Deletion	Frameshift	OsKitaake04g242000
Chr4	31087163	1	Deletion	Frameshift	OsKitaake04g242000
Chr4	31087186	1	Deletion	Frameshift	OsKitaake04g242000
Chr4	31087251	1	Deletion	Frameshift	OsKitaake04g242000
Chr4	31087264	1	Deletion	Frameshift	OsKitaake04g242000
Chr4	31087283	2	Deletion	Frameshift	OsKitaake04g242000
Chr4	31087289	1	Deletion	Frameshift	OsKitaake04g242000
Chr4	31087297	2	Deletion	Frameshift	OsKitaake04g242000
Chr4	31087308	2	Deletion	Frameshift	OsKitaake04g242000
Chr4	31322562	1	Insertion	Frameshift	OsKitaake04g245300
Chr4	31322567	1	Insertion	Frameshift	OsKitaake04g245300
Chr4	31322573	1	Insertion	Frameshift	OsKitaake04g245300
Chr4	31322587	1	Insertion	Frameshift	OsKitaake04g245300
Chr4	31527357	1	Insertion	Frameshift	OsKitaake04g248000
Chr4	31527375	1	Insertion	Frameshift	OsKitaake04g248000
Chr4	31527383	1	Insertion	Frameshift	OsKitaake04g248000
Chr4	31527392	1	Insertion	Frameshift	OsKitaake04g248000
Chr4	31552194	1	Insertion	Frameshift	OsKitaake04g248400
Chr4	31552195	1	Insertion	Frameshift	OsKitaake04g248400
Chr4	31687473	1	Insertion	Splice donor	OsKitaake04g250300
Chr4	31989171	2	Insertion	Splice donor	OsKitaake04g254000
Chr4	32090585	1	Deletion	Frameshift	OsKitaake04g255000
Chr4	32101537	1	Insertion	Frameshift	OsKitaake04g255100
Chr4	32101551	1	Insertion	Frameshift	OsKitaake04g255100
Chr4	32141424	1	Insertion	Frameshift	OsKitaake04g255500
Chr4	32203661	1	Deletion	Splice donor	OsKitaake04g256000
Chr4	32203876	1	Insertion	Splice donor	OsKitaake04g256000
Chr4	32203892	1	Insertion	Frameshift	OsKitaake04g256000
Chr4	32203911	1	Insertion	Frameshift	OsKitaake04g256000
Chr4	32325486	1	Insertion	Frameshift	OsKitaake04g257800
Chr4	32325494	1	Insertion	Frameshift	OsKitaake04g257800
Chr4	32325514	1	Insertion	Frameshift	OsKitaake04g257800
Chr4	32447859	1	Insertion	Frameshift	OsKitaake04g259700
Chr4	32447868	1	Insertion	Frameshift	OsKitaake04g259700
Chr4	32447878	1	Insertion	Frameshift	OsKitaake04g259700
Chr4	32447882	1	Insertion	Frameshift	OsKitaake04g259700
Chr4	32543438	1	Deletion	Frameshift	OsKitaake04g260900
Chr4	32543455	2	Insertion	Frameshift	OsKitaake04g260900
Chr4	32543474	2	Insertion	Frameshift	OsKitaake04g260900
Chr4	32543510	1	Deletion	Frameshift	OsKitaake04g260900
Chr4	32733231	3	Deletion	Inframe deletion	OsKitaake04g263900
Chr4	32733682	1	Deletion	Frameshift	OsKitaake04g263900
Chr4	32733690	1	Insertion	Frameshift	OsKitaake04g263900
Chr4	32733693	1	Deletion	Frameshift	OsKitaake04g263900
Chr4	32733698	2	Deletion	Frameshift	OsKitaake04g263900
Chr4	32738239	6	Deletion	Inframe deletion	OsKitaake04g264000
Chr4	32738256	3	Deletion	Inframe deletion	OsKitaake04g264000
Chr4	32738348	3	Insertion	Frameshift	OsKitaake04g264000
Chr4	32739865	16	Insertion	Frameshift	OsKitaake04g264000
Chr4	32739867	2	Insertion	Frameshift	OsKitaake04g264000
Chr4	32740813	15	Deletion	Inframe deletion	OsKitaake04g264000
Chr4	32747153	2	Deletion	Frameshift	OsKitaake04g264100
Chr4	32760623	1	Deletion	Frameshift	OsKitaake04g264300
Chr4	33192802	1	Insertion	Frameshift	OsKitaake04g270500
Chr4	33259705	1	Deletion	Frameshift	OsKitaake04g271600
Chr4	33324063	8	Insertion	Frameshift	OsKitaake04g273050
Chr4	33346304	6	Deletion	Inframe deletion	OsKitaake04g273400
Chr4	33365285	5	Insertion	Frameshift	OsKitaake04g273700
Chr4	33365286	2	Insertion	Frameshift	OsKitaake04g273700
Chr4	33365287	2	Insertion	Frameshift	OsKitaake04g273700
Chr4	33365296	1	Insertion	Frameshift	OsKitaake04g273700
Chr4	33365297	1	Insertion	Frameshift	OsKitaake04g273700
Chr4	33365298	1	Insertion	Frameshift	OsKitaake04g273700
Chr4	33365655	8	Insertion	Frameshift	OsKitaake04g273700
Chr4	33375302	12	Insertion	Frameshift	OsKitaake04g273900
Chr4	33380552	2	Insertion	Splice donor	OsKitaake04g274000
Chr4	33399496	6	Deletion	Inframe deletion	OsKitaake04g274300
Chr4	33400509	6	Insertion	Frameshift	OsKitaake04g274300
Chr4	33407409	2	Insertion	Frameshift	OsKitaake04g274350
Chr4	33407425	3	Deletion	Inframe deletion	OsKitaake04g274350
Chr4	33407456	25	Deletion	Frameshift	OsKitaake04g274350
Chr4	33407725	4	Deletion	Frameshift	OsKitaake04g274350
Chr4	33413112	2	Deletion	Frameshift	OsKitaake04g274400
Chr4	33413372	6	Deletion	Inframe deletion	OsKitaake04g274400
Chr4	33414240	6	Deletion	Inframe deletion	OsKitaake04g274400
Chr4	33431041	1	Insertion	Splice acceptor	OsKitaake04g274700
Chr4	33432360	1	Insertion	Frameshift	OsKitaake04g274700
Chr4	33432378	9	Insertion	Frameshift	OsKitaake04g274700
Chr4	33442285	6	Insertion	Frameshift	OsKitaake04g274900
Chr4	33483687	26	Insertion	Frameshift	OsKitaake04g275500
Chr4	33588449	9	Deletion	Inframe deletion	OsKitaake04g277900
Chr4	33606666	1	Deletion	Frameshift	OsKitaake04g278200
Chr4	33606679	1	Deletion	Frameshift	OsKitaake04g278200
Chr4	33644115	1	Deletion	Frameshift	OsKitaake04g278750
Chr4	33897917	1	Deletion	Frameshift	OsKitaake04g282200
Chr4	33898628	1	Insertion	Frameshift	OsKitaake04g282200
Chr4	33898746	1	Deletion	Frameshift	OsKitaake04g282200
Chr4	33898764	1	Deletion	Frameshift	OsKitaake04g282200
Chr4	33898767	1	Insertion	Frameshift	OsKitaake04g282200
Chr4	33898770	1	Deletion	Frameshift	OsKitaake04g282200
Chr4	33898787	1	Deletion	Frameshift	OsKitaake04g282200
Chr4	33898810	1	Deletion	Frameshift	OsKitaake04g282200
Chr4	33898817	1	Deletion	Frameshift	OsKitaake04g282200
Chr4	33934230	1	Insertion	Frameshift	OsKitaake04g282600
Chr4	33934500	1	Deletion	Frameshift	OsKitaake04g282600
Chr4	33934516	1	Deletion	Frameshift	OsKitaake04g282600
Chr4	33934519	1	Deletion	Frameshift	OsKitaake04g282600
Chr4	33934526	1	Deletion	Frameshift	OsKitaake04g282600
Chr4	33991624	1	Insertion	Frameshift	OsKitaake04g283500
Chr4	34328245	1	Deletion	Frameshift	OsKitaake04g285000
Chr4	34328424	1	Insertion	Frameshift	OsKitaake04g285000
Chr4	34328429	1	Insertion	Frameshift	OsKitaake04g285000
Chr4	34328441	1	Insertion	Frameshift	OsKitaake04g285000
Chr4	34328497	1	Insertion	Frameshift	OsKitaake04g285000
Chr4	34328519	1	Insertion	Frameshift	OsKitaake04g285000
Chr4	34328530	1	Insertion	Frameshift	OsKitaake04g285000
Chr4	34328531	1	Insertion	Frameshift	OsKitaake04g285000
Chr4	34328540	1	Insertion	Frameshift	OsKitaake04g285000
Chr4	34328545	1	Insertion	Frameshift	OsKitaake04g285000
Chr4	34328548	1	Insertion	Frameshift	OsKitaake04g285000
Chr4	34328552	1	Insertion	Frameshift	OsKitaake04g285000
Chr4	34328561	1	Insertion	Frameshift	OsKitaake04g285000
Chr4	34385272	1	Deletion	Frameshift	OsKitaake04g285700
Chr4	34385280	1	Deletion	Frameshift	OsKitaake04g285700
Chr4	34385284	1	Deletion	Frameshift	OsKitaake04g285700
Chr4	34385295	1	Deletion	Frameshift	OsKitaake04g285700
Chr4	34385306	1	Deletion	Frameshift	OsKitaake04g285700
Chr4	34385319	2	Deletion	Frameshift	OsKitaake04g285700
Chr4	34385329	1	Deletion	Frameshift	OsKitaake04g285700
Chr4	34385338	1	Deletion	Frameshift	OsKitaake04g285700
Chr4	34385346	1	Deletion	Frameshift	OsKitaake04g285700
Chr4	34385353	1	Deletion	Frameshift	OsKitaake04g285700
Chr4	34385361	1	Deletion	Frameshift	OsKitaake04g285700
Chr4	34385369	1	Deletion	Frameshift	OsKitaake04g285700
Chr4	34385384	1	Deletion	Frameshift	OsKitaake04g285700
Chr4	34385396	1	Deletion	Frameshift	OsKitaake04g285700
Chr4	34385400	1	Deletion	Frameshift	OsKitaake04g285700
Chr4	34385425	1	Deletion	Frameshift	OsKitaake04g285700
Chr4	34385441	1	Deletion	Frameshift	OsKitaake04g285700
Chr4	34385454	1	Deletion	Frameshift	OsKitaake04g285700
Chr4	34521621	1	Deletion	Frameshift	OsKitaake04g287600
Chr4	34778153	3	Deletion	Inframe deletion	OsKitaake04g290600
Chr4	34787049	3	Insertion	Frameshift	OsKitaake04g290800
Chr4	34787058	3	Deletion	Inframe deletion	OsKitaake04g290800
Chr4	34787075	3	Deletion	Inframe deletion	OsKitaake04g290800
Chr4	35168342	1	Insertion	Frameshift	OsKitaake04g296200
Chr4	35168373	1	Insertion	Frameshift	OsKitaake04g296200
Chr4	35207423	1	Insertion	Splice donor	OsKitaake04g296800
Chr4	35207428	1	Insertion	Frameshift	OsKitaake04g296800
Chr4	35207446	2	Insertion	Frameshift	OsKitaake04g296800
Chr4	35207450	1	Insertion	Frameshift	OsKitaake04g296800
Chr4	35207475	1	Insertion	Frameshift	OsKitaake04g296800
Chr4	35207546	1	Deletion	Frameshift	OsKitaake04g296800
Chr4	35207549	1	Deletion	Frameshift	OsKitaake04g296800
Chr4	35207578	1	Deletion	Frameshift	OsKitaake04g296800
Chr4	35207586	1	Insertion	Frameshift	OsKitaake04g296800
Chr4	35207627	1	Insertion	Frameshift	OsKitaake04g296800
Chr4	35207646	1	Insertion	Frameshift	OsKitaake04g296800
Chr4	35314886	2	Insertion	Frameshift	OsKitaake04g298200
Chr4	35314888	1	Insertion	Frameshift	OsKitaake04g298200
Chr4	35314891	1	Insertion	Frameshift	OsKitaake04g298200
Chr4	35314893	1	Insertion	Frameshift	OsKitaake04g298200
Chr4	35314896	1	Insertion	Frameshift	OsKitaake04g298200
Chr4	35314899	1	Insertion	Frameshift	OsKitaake04g298200
Chr4	35314904	2	Insertion	Frameshift	OsKitaake04g298200
Chr4	35314908	1	Insertion	Frameshift	OsKitaake04g298200
Chr4	35314910	1	Insertion	Frameshift	OsKitaake04g298200
Chr4	35314913	1	Insertion	Frameshift	OsKitaake04g298200
Chr4	35314914	1	Insertion	Frameshift	OsKitaake04g298200
Chr4	35314917	1	Insertion	Frameshift	OsKitaake04g298200
Chr4	35314921	1	Insertion	Frameshift	OsKitaake04g298200
Chr4	35314923	1	Insertion	Frameshift	OsKitaake04g298200
Chr4	35314925	1	Insertion	Frameshift	OsKitaake04g298200
Chr4	35314927	1	Insertion	Frameshift	OsKitaake04g298200
Chr4	35314930	1	Insertion	Frameshift	OsKitaake04g298200
Chr4	35314934	1	Insertion	Frameshift	OsKitaake04g298200
Chr4	35314936	1	Insertion	Frameshift	OsKitaake04g298200
Chr4	35314941	1	Insertion	Frameshift	OsKitaake04g298200
Chr4	35314945	1	Insertion	Frameshift	OsKitaake04g298200
Chr4	35314947	1	Insertion	Frameshift	OsKitaake04g298200
Chr4	35314950	1	Insertion	Frameshift	OsKitaake04g298200
Chr4	35314956	1	Insertion	Frameshift	OsKitaake04g298200
Chr4	35314960	1	Insertion	Frameshift	OsKitaake04g298200
Chr4	35314962	1	Insertion	Frameshift	OsKitaake04g298200
Chr4	35314964	1	Insertion	Frameshift	OsKitaake04g298200
Chr4	35314969	1	Insertion	Frameshift	OsKitaake04g298200
Chr4	35314976	1	Insertion	Frameshift	OsKitaake04g298200
[truncated: 592 more rows]

## Sheet: PAV-genes
Additional file 4. Comparative genomic analysis between KitaakeX and Nipponbare
Chromosome	Start Position	End Position	Size (bp)	Gene ID
Chr1	1399824	1416991	17167	OsKitaake01g017100
Chr1	1399824	1416991	17167	OsKitaake01g017200
Chr1	1421226	1426237	5011	OsKitaake01g017300
Chr1	1421226	1426237	5011	OsKitaake01g017308
Chr1	1421226	1426237	5011	OsKitaake01g017500
Chr1	1569002	1569497	495	OsKitaake01g019100
Chr1	2432102	2441461	9359	OsKitaake01g030500
Chr1	2432102	2441461	9359	OsKitaake01g030508
Chr1	2432102	2441461	9359	OsKitaake01g030600
Chr1	2432102	2441461	9359	OsKitaake01g030700
Chr1	2468630	2490874	22244	OsKitaake01g031500
Chr1	2468630	2490874	22244	OsKitaake01g031600
Chr1	2577458	2578590	1132	OsKitaake01g032700
Chr1	2830542	2832350	1808	OsKitaake01g035900
Chr1	2834358	2838833	4475	OsKitaake01g035908
Chr1	2846302	2848013	1711	OsKitaake01g036200
Chr1	3145589	3168827	23238	OsKitaake01g041200
Chr1	3145589	3168827	23238	OsKitaake01g041300
Chr1	3244339	3245021	682	OsKitaake01g042400
Chr1	3276659	3287576	10917	OsKitaake01g042908
Chr1	3289983	3298907	8924	OsKitaake01g043000
Chr1	3353049	3358400	5351	OsKitaake01g044100
Chr1	5798285	5799217	932	OsKitaake01g073508
Chr1	5842846	5853455	10609	OsKitaake01g074000
Chr1	5842846	5853455	10609	OsKitaake01g074100
Chr1	8958228	8958642	414	OsKitaake01g112000
Chr1	10212246	10225231	12985	OsKitaake01g128600
Chr1	11661739	11675554	13815	OsKitaake01g140800
Chr1	16255638	16262380	6742	OsKitaake01g175000
Chr1	16815233	16820010	4777	OsKitaake01g178300
Chr1	18897952	18940748	42796	OsKitaake01g189900
Chr1	18897952	18940748	42796	OsKitaake01g190100
Chr1	18897952	18940748	42796	OsKitaake01g190200
Chr1	20143442	20144087	645	OsKitaake01g198200
Chr1	21322343	21323043	700	OsKitaake01g207708
Chr1	21339707	21371134	31427	OsKitaake01g207724
Chr1	21339707	21371134	31427	OsKitaake01g207732
Chr1	21376433	21417593	41160	OsKitaake01g207748
Chr1	21376433	21417593	41160	OsKitaake01g207756
Chr1	21376433	21417593	41160	OsKitaake01g207764
Chr1	21376433	21417593	41160	OsKitaake01g207772
Chr1	21421748	21424797	3049	OsKitaake01g207780
Chr1	23920956	23921104	148	OsKitaake01g229700
Chr1	24062428	24065411	2983	OsKitaake01g231100
Chr1	24218573	24222584	4011	OsKitaake01g233200
Chr1	24369956	24372955	2999	OsKitaake01g234700
Chr1	26135738	26138782	3044	OsKitaake01g254800
Chr1	28019691	28024225	4534	OsKitaake01g272600
Chr1	30551353	30559069	7716	OsKitaake01g302400
Chr1	32635954	32640323	4369	OsKitaake01g331100
Chr1	34076030	34076187	157	OsKitaake01g351000
Chr1	35822443	35828995	6552	OsKitaake01g379500
Chr1	35822443	35828995	6552	OsKitaake01g379600
Chr1	42170801	42176867	6066	OsKitaake01g463500
Chr1	42170801	42176867	6066	OsKitaake01g463600
Chr1	42170801	42176867	6066	OsKitaake01g463700
Chr10	2716963	2722402	5439	OsKitaake10g022300
Chr10	4236738	4270454	33716	OsKitaake10g032200
Chr10	4270939	4290792	19853	OsKitaake10g032250
Chr10	4270939	4290792	19853	OsKitaake10g032300
Chr10	10429747	10453794	24047	OsKitaake10g061050
Chr10	12873638	12926610	52972	OsKitaake10g078500
Chr10	13673950	13675662	1712	OsKitaake10g083100
Chr10	16492234	16493164	930	OsKitaake10g112000
Chr10	17916711	17916817	106	OsKitaake10g125300
Chr10	19101218	19101616	398	OsKitaake10g137301
Chr10	19333332	19352352	19020	OsKitaake10g140200
Chr10	19333332	19352352	19020	OsKitaake10g140300
Chr10	19333332	19352352	19020	OsKitaake10g140301
Chr10	19333332	19352352	19020	OsKitaake10g140500
Chr10	19333332	19352352	19020	OsKitaake10g140600
Chr11	225294	225534	240	OsKitaake11g001500
Chr11	3610030	3620772	10742	OsKitaake11g050000
Chr11	4893773	4898072	4299	OsKitaake11g062701
Chr11	4900209	4914688	14479	OsKitaake11g062800
Chr11	5029981	5045883	15902	OsKitaake11g063900
Chr11	5113197	5114131	934	OsKitaake11g064366
Chr11	5142965	5146670	3705	OsKitaake11g064700
Chr11	5142965	5146670	3705	OsKitaake11g064800
Chr11	5186383	5188473	2090	OsKitaake11g065200
Chr11	5196135	5197549	1414	OsKitaake11g065301
Chr11	5245758	5246117	359	OsKitaake11g066000
Chr11	6672694	6673254	560	OsKitaake11g079200
Chr11	6685159	6715737	30578	OsKitaake11g079500
Chr11	6685159	6715737	30578	OsKitaake11g079600
Chr11	6685159	6715737	30578	OsKitaake11g079700
Chr11	6718594	6741478	22884	OsKitaake11g079750
Chr11	6718594	6741478	22884	OsKitaake11g079800
Chr11	6759410	6830722	71312	OsKitaake11g079855
Chr11	6885641	6918308	32667	OsKitaake11g079910
Chr11	6885641	6918308	32667	OsKitaake11g079965
Chr11	6918443	6941793	23350	OsKitaake11g080020
Chr11	6918443	6941793	23350	OsKitaake11g080075
Chr11	6942326	7010727	68401	OsKitaake11g080130
Chr11	6942326	7010727	68401	OsKitaake11g080185
Chr11	6942326	7010727	68401	OsKitaake11g080240
Chr11	6942326	7010727	68401	OsKitaake11g080300
Chr11	7011886	7121867	109981	OsKitaake11g080400
Chr11	7011886	7121867	109981	OsKitaake11g080500
Chr11	7011886	7121867	109981	OsKitaake11g080600
Chr11	7011886	7121867	109981	OsKitaake11g080700
Chr11	7011886	7121867	109981	OsKitaake11g080800
Chr11	7122803	7123492	689	OsKitaake11g080900
Chr11	7216347	7220238	3891	OsKitaake11g082001
Chr11	7223161	7223795	634	OsKitaake11g082200
Chr11	7247514	7257001	9487	OsKitaake11g082566
Chr11	7247514	7257001	9487	OsKitaake11g082632
Chr11	7278482	7279653	1171	OsKitaake11g082800
Chr11	7282534	7285511	2977	OsKitaake11g082900
Chr11	7489195	7495250	6055	OsKitaake11g084432
Chr11	7550344	7558063	7719	OsKitaake11g084933
Chr11	7550344	7558063	7719	OsKitaake11g084966
Chr11	7578942	7579413	471	OsKitaake11g085200
Chr11	9202453	9240786	38333	OsKitaake11g096900
Chr11	9202453	9240786	38333	OsKitaake11g097000
Chr11	9202453	9240786	38333	OsKitaake11g097033
Chr11	17175116	17176566	1450	OsKitaake11g134000
Chr11	18551219	18568318	17099	OsKitaake11g143600
Chr11	18698105	18698320	215	OsKitaake11g145200
Chr11	19837567	19838071	504	OsKitaake11g155000
Chr11	19897237	19938935	41698	OsKitaake11g155900
Chr11	19897237	19938935	41698	OsKitaake11g156000
Chr11	19897237	19938935	41698	OsKitaake11g156200
Chr11	19897237	19938935	41698	OsKitaake11g156300
Chr11	19897237	19938935	41698	OsKitaake11g156450
Chr11	19940208	19940783	575	OsKitaake11g156450
Chr11	19950426	19988302	37876	OsKitaake11g156700
Chr11	19950426	19988302	37876	OsKitaake11g156800
Chr11	19950426	19988302	37876	OsKitaake11g156900
Chr11	19950426	19988302	37876	OsKitaake11g157000
Chr11	19950426	19988302	37876	OsKitaake11g157100
Chr11	19991408	20005476	14068	OsKitaake11g157157
Chr11	19991408	20005476	14068	OsKitaake11g157214
Chr11	20007204	20017175	9971	OsKitaake11g157271
Chr11	20025148	20052223	27075	OsKitaake11g157328
Chr11	20053649	20145616	91967	OsKitaake11g157385
Chr11	20053649	20145616	91967	OsKitaake11g157442
Chr11	20605474	20605720	246	OsKitaake11g161200
Chr11	20611736	20612182	446	OsKitaake11g161300
Chr11	22650506	22667977	17471	OsKitaake11g179850
Chr11	22701544	22705713	4169	OsKitaake11g180000
Chr11	22987933	23045057	57124	OsKitaake11g182700
Chr11	22987933	23045057	57124	OsKitaake11g182800
Chr11	22987933	23045057	57124	OsKitaake11g182900
Chr11	23159679	23161094	1415	OsKitaake11g183450
Chr11	23171362	23175144	3782	OsKitaake11g183750
Chr11	23175879	23183824	7945	OsKitaake11g183800
Chr11	23436872	23440675	3803	OsKitaake11g186700
Chr11	23436872	23440675	3803	OsKitaake11g186800
Chr11	25115069	25132077	17008	OsKitaake11g203030
Chr11	25115069	25132077	17008	OsKitaake11g203035
Chr11	25115069	25132077	17008	OsKitaake11g203040
Chr11	25133056	25157936	24880	OsKitaake11g203045
Chr11	25158642	25161656	3014	OsKitaake11g203050
Chr11	25186979	25217133	30154	OsKitaake11g203060
Chr11	25186979	25217133	30154	OsKitaake11g203065
Chr11	25218149	25224942	6793	OsKitaake11g203065
Chr11	25225927	25317451	91524	OsKitaake11g203070
Chr11	25225927	25317451	91524	OsKitaake11g203075
Chr11	25225927	25317451	91524	OsKitaake11g203080
Chr11	25225927	25317451	91524	OsKitaake11g203085
Chr11	25225927	25317451	91524	OsKitaake11g203100
Chr11	26563891	26568850	4959	OsKitaake11g216000
Chr11	26648533	26650296	1763	OsKitaake11g216900
Chr11	26908142	26908259	117	OsKitaake11g218700
Chr11	26930987	26981692	50705	OsKitaake11g219300
Chr11	26930987	26981692	50705	OsKitaake11g219400
Chr11	26985698	26986455	757	OsKitaake11g219450
Chr11	27006194	27007075	881	OsKitaake11g219700
Chr11	27043662	27056915	13253	OsKitaake11g220500
Chr11	28218845	28219566	721	OsKitaake11g231700
Chr11	28282802	28307719	24917	OsKitaake11g232400
Chr11	28308591	28346217	37626	OsKitaake11g232501
Chr11	28506035	28510184	4149	OsKitaake11g233300
Chr11	28748994	28770756	21762	OsKitaake11g235501
Chr11	28843220	28855697	12477	OsKitaake11g236000
Chr11	28843220	28855697	12477	OsKitaake11g236100
Chr11	28843220	28855697	12477	OsKitaake11g236200
Chr11	28857572	28859591	2019	OsKitaake11g236250
Chr11	28950121	28951574	1453	OsKitaake11g236700
Chr11	29009692	29011034	1342	OsKitaake11g237600
Chr11	29031142	29031879	737	OsKitaake11g237700
Chr11	29034068	29037319	3251	OsKitaake11g237800
Chr11	29054529	29059511	4982	OsKitaake11g238000
Chr11	29077259	29099880	22621	OsKitaake11g238300
Chr11	29077259	29099880	22621	OsKitaake11g238400
Chr11	29077259	29099880	22621	OsKitaake11g238500
Chr11	29129874	29135200	5326	OsKitaake11g238700
Chr11	29129874	29135200	5326	OsKitaake11g238800
Chr11	29442558	29444142	1584	OsKitaake11g241600
Chr12	375967	376099	132	OsKitaake12g004400
Chr12	5873872	5876882	3010	OsKitaake12g070800
Chr12	5877602	5878884	1282	OsKitaake12g070900
Chr12	5880255	5912500	32245	OsKitaake12g071000
Chr12	6107948	6109475	1527	OsKitaake12g072025
Chr12	6115473	6118662	3189	OsKitaake12g071825
Chr12	6140274	6143240	2966	OsKitaake12g071500
Chr12	6145572	6179011	33439	OsKitaake12g071525
Chr12	6574133	6574320	187	OsKitaake12g075600
Chr12	7768619	7781123	12504	OsKitaake12g083700
Chr12	8431874	8440885	9011	OsKitaake12g087300
Chr12	13733343	13733532	189	OsKitaake12g113100
Chr12	18057885	18058289	404	OsKitaake12g133100
Chr12	18116153	18131867	15714	OsKitaake12g133400
Chr12	18151969	18155310	3341	OsKitaake12g133500
Chr12	18164224	18192165	27941	OsKitaake12g133525
Chr12	18164224	18192165	27941	OsKitaake12g133550
Chr12	18200781	18201607	826	OsKitaake12g133575
Chr12	18237074	18237223	149	OsKitaake12g133650
Chr12	18243948	18245795	1847	OsKitaake12g133700
Chr12	18315695	18317807	2112	OsKitaake12g134000
Chr12	18593194	18611556	18362	OsKitaake12g136900
Chr12	23020263	23020352	89	OsKitaake12g182900
Chr12	25150337	25152942	2605	OsKitaake12g204000
Chr12	25233232	25257736	24504	OsKitaake12g205500
Chr12	25233232	25257736	24504	OsKitaake12g205533
Chr12	25233232	25257736	24504	OsKitaake12g205566
Chr12	25233232	25257736	24504	OsKitaake12g205600
Chr12	25233232	25257736	24504	OsKitaake12g205700
Chr12	26591999	26593723	1724	OsKitaake12g220800
Chr12	26594791	26596785	1994	OsKitaake12g220900
Chr12	26619235	26630068	10833	OsKitaake12g221200
Chr12	26619235	26630068	10833	OsKitaake12g221250
Chr12	26619235	26630068	10833	OsKitaake12g221300
Chr12	26630834	26631195	361	OsKitaake12g221350
Chr12	26705984	26707792	1808	OsKitaake12g221901
Chr12	26719130	26737967	18837	OsKitaake12g222100
Chr2	6052328	6065090	12762	OsKitaake02g082800
Chr2	13776578	13781012	4434	OsKitaake02g150500
Chr2	16986365	16986701	336	OsKitaake02g172600
Chr2	17524326	17524508	182	OsKitaake02g175900
Chr2	18018841	18092421	73580	OsKitaake02g179900
Chr2	18339621	18351307	11686	OsKitaake02g181900
Chr2	18421471	18426892	5421	OsKitaake02g182600
Chr2	24782420	24785194	2774	OsKitaake02g246600
Chr2	24782420	24785194	2774	OsKitaake02g246700
Chr2	24786516	24787447	931	OsKitaake02g246700
Chr2	24796365	24817410	21045	OsKitaake02g246900
Chr2	24796365	24817410	21045	OsKitaake02g247000
Chr2	24796365	24817410	21045	OsKitaake02g247100
Chr2	24817597	24836640	19043	OsKitaake02g247200
Chr2	24817597	24836640	19043	OsKitaake02g247300
Chr2	24817597	24836640	19043	OsKitaake02g247400
Chr2	24817597	24836640	19043	OsKitaake02g247500
Chr2	24817597	24836640	19043	OsKitaake02g247601
Chr2	24836931	24857472	20541	OsKitaake02g247601
Chr2	24836931	24857472	20541	OsKitaake02g247700
Chr2	24836931	24857472	20541	OsKitaake02g247780
Chr2	25093460	25161614	68154	OsKitaake02g247940
Chr2	25093460	25161614	68154	OsKitaake02g248020
Chr2	25573278	25577551	4273	OsKitaake02g252800
Chr3	8573289	8573654	365	OsKitaake03g117600
Chr3	8575263	8576663	1400	OsKitaake03g117600
Chr3	13891526	13904025	12499	OsKitaake03g183100
Chr3	13891526	13904025	12499	OsKitaake03g183200
Chr3	13923480	13941335	17855	OsKitaake03g183450
Chr3	13923480	13941335	17855	OsKitaake03g183500
Chr3	16569339	16574594	5255	OsKitaake03g209500
Chr3	16597668	16607469	9801	OsKitaake03g209800
Chr3	16628913	16638320	9407	OsKitaake03g210050
Chr3	16628913	16638320	9407	OsKitaake03g210100
Chr3	16775489	16901290	125801	OsKitaake03g210700
Chr3	16775489	16901290	125801	OsKitaake03g210800
Chr3	16775489	16901290	125801	OsKitaake03g210900
Chr3	16775489	16901290	125801	OsKitaake03g211000
Chr3	16902212	16902654	442	OsKitaake03g211000
Chr3	16905727	16938728	33001	OsKitaake03g211200
Chr3	16905727	16938728	33001	OsKitaake03g211100
Chr3	16905727	16938728	33001	OsKitaake03g211200
Chr3	16905727	16938728	33001	OsKitaake03g211233
Chr3	26115241	26120943	5702	OsKitaake03g275000
Chr3	27500820	27505139	4319	OsKitaake03g283900
Chr3	29958744	29961746	3002	OsKitaake03g313700
Chr3	29958744	29961746	3002	OsKitaake03g313800
Chr3	30174838	30176237	1399	OsKitaake03g316300
Chr3	32280486	32350103	69617	OsKitaake03g342500
Chr3	32280486	32350103	69617	OsKitaake03g342600
Chr3	32374641	32380486	5845	OsKitaake03g342700
Chr3	32374641	32380486	5845	OsKitaake03g342800
Chr4	717796	719550	1754	OsKitaake04g005800
Chr4	1447822	1448222	400	OsKitaake04g010500
Chr4	3155862	3190687	34825	OsKitaake04g016750
Chr4	3155862	3190687	34825	OsKitaake04g016775
Chr4	3191581	3239075	47494	OsKitaake04g016801
Chr4	3191581	3239075	47494	OsKitaake04g016826
Chr4	3191581	3239075	47494	OsKitaake04g016851
Chr4	4042936	4165948	123012	OsKitaake04g019800
Chr4	4042936	4165948	123012	OsKitaake04g019900
Chr4	4042936	4165948	123012	OsKitaake04g020000
Chr4	4042936	4165948	123012	OsKitaake04g020100
Chr4	4211945	4226083	14138	OsKitaake04g020600
Chr4	4249520	4254002	4482	OsKitaake04g020900
Chr4	4271864	4278729	6865	OsKitaake04g021150
Chr4	4870964	4875076	4112	OsKitaake04g022100
Chr4	5352561	5352661	100	OsKitaake04g026000
Chr4	7687411	7688467	1056	OsKitaake04g038700
Chr4	9147213	9179138	31925	OsKitaake04g047100
Chr4	16057551	16071845	14294	OsKitaake04g077832
Chr4	17263068	17338860	75792	OsKitaake04g084700
Chr4	17263068	17338860	75792	OsKitaake04g084800
Chr4	17263068	17338860	75792	OsKitaake04g085000
Chr4	17263068	17338860	75792	OsKitaake04g085100
Chr4	17372529	17372740	211	OsKitaake04g085550
Chr4	18696513	18726030	29517	OsKitaake04g093500
Chr4	18696513	18726030	29517	OsKitaake04g093601
Chr4	18696513	18726030	29517	OsKitaake04g093700
Chr4	18696513	18726030	29517	OsKitaake04g093800
Chr4	18754792	18757569	2777	OsKitaake04g094000
Chr4	18817089	18819023	1934	OsKitaake04g094500
Chr4	18841372	18842478	1106	OsKitaake04g094600
Chr4	18957040	19015008	57968	OsKitaake04g095200
Chr4	18957040	19015008	57968	OsKitaake04g095266
Chr4	18957040	19015008	57968	OsKitaake04g095332
Chr4	18957040	19015008	57968	OsKitaake04g095400
Chr4	18957040	19015008	57968	OsKitaake04g095500
Chr4	19047256	19050379	3123	OsKitaake04g095966
Chr4	19456620	19460409	3789	OsKitaake04g099800
Chr4	19731738	19731826	88	OsKitaake04g102800
Chr4	21109861	21113760	3899	OsKitaake04g116000
Chr4	21274043	21274394	351	OsKitaake04g117700
Chr4	21322413	21328167	5754	OsKitaake04g118400
Chr4	21347184	21348388	1204	OsKitaake04g118800
Chr4	21922758	21925032	2274	OsKitaake04g127000
Chr4	22594547	22595394	847	OsKitaake04g134000
Chr4	23211266	23262275	51009	OsKitaake04g141800
Chr4	23211266	23262275	51009	OsKitaake04g141900
Chr4	23211266	23262275	51009	OsKitaake04g142000
Chr4	23211266	23262275	51009	OsKitaake04g142100
Chr4	23211266	23262275	51009	OsKitaake04g142200
Chr4	23211266	23262275	51009	OsKitaake04g142300
Chr4	23449436	23453734	4298	OsKitaake04g145500
Chr4	24090507	24090622	115	OsKitaake04g153801
Chr4	31013895	31014146	251	OsKitaake04g241000
Chr4	33274548	33275376	828	OsKitaake04g272101
Chr4	33549147	33553225	4078	OsKitaake04g276700
Chr4	33723804	33734581	10777	OsKitaake04g280200
Chr4	33934235	33934347	112	OsKitaake04g282600
Chr4	36871605	36916160	44555	OsKitaake04g322100
Chr4	36871605	36916160	44555	OsKitaake04g322200
Chr4	36871605	36916160	44555	OsKitaake04g322300
Chr4	36871605	36916160	44555	OsKitaake04g322400
Chr4	36871605	36916160	44555	OsKitaake04g322500
Chr4	36871605	36916160	44555	OsKitaake04g322600
Chr4	36871605	36916160	44555	OsKitaake04g322700
Chr4	36871605	36916160	44555	OsKitaake04g322800
Chr4	36871605	36916160	44555	OsKitaake04g322900
Chr4	36871605	36916160	44555	OsKitaake04g323000
Chr4	36871605	36916160	44555	OsKitaake04g323100
Chr5	13739216	13741149	1933	OsKitaake05g106400
Chr5	14783505	14787941	4436	OsKitaake05g112800
Chr5	27764741	27769520	4779	OsKitaake05g254200
Chr5	27764741	27769520	4779	OsKitaake05g254300
Chr6	3279302	3281142	1840	OsKitaake06g045800
Chr6	3353738	3354174	436	OsKitaake06g046700
Chr6	4332921	4333926	1005	OsKitaake06g059600
Chr6	4547197	4549338	2141	OsKitaake06g062700
Chr6	4547197	4549338	2141	OsKitaake06g062750
Chr6	4574456	4624757	50301	OsKitaake06g062800
Chr6	4574456	4624757	50301	OsKitaake06g062900
Chr6	4574456	4624757	50301	OsKitaake06g063000
Chr6	4574456	4624757	50301	OsKitaake06g063100
Chr6	10574899	10586275	11376	OsKitaake06g119000
Chr6	10610165	10611898	1733	OsKitaake06g119300
Chr6	10614873	10615858	985	OsKitaake06g119400
Chr6	18482069	18489737	7668	OsKitaake06g169003
Chr6	18550781	18553625	2844	OsKitaake06g169400
Chr6	18858134	18859023	889	OsKitaake06g170700
Chr6	18865223	18897918	32695	OsKitaake06g170900
Chr6	18900067	18901987	1920	OsKitaake06g171100
Chr6	22311316	22313382	2066	OsKitaake06g195500
Chr6	22315067	22384365	69298	OsKitaake06g195600
Chr6	22315067	22384365	69298	OsKitaake06g195700
Chr6	22315067	22384365	69298	OsKitaake06g195703
Chr6	22315067	22384365	69298	OsKitaake06g195900
Chr6	22315067	22384365	69298	OsKitaake06g196100
Chr6	22315067	22384365	69298	OsKitaake06g196200
Chr6	22315067	22384365	69298	OsKitaake06g196300
Chr6	22315067	22384365	69298	OsKitaake06g196400
Chr6	22315067	22384365	69298	OsKitaake06g196500
Chr6	22384878	22394000	9122	OsKitaake06g196600
Chr6	23558204	23562344	4140	OsKitaake06g207806
Chr6	24771212	24771570	358	OsKitaake06g220000
Chr6	28156502	28173158	16656	OsKitaake06g256300
Chr6	28156502	28173158	16656	OsKitaake06g256303
Chr7	1201555	1217182	15627	OsKitaake07g016800
Chr7	1201555	1217182	15627	OsKitaake07g016900
Chr7	1275881	1284796	8915	OsKitaake07g018600
Chr7	1673256	1673384	128	OsKitaake07g023500
Chr7	1676448	1684420	7972	OsKitaake07g023600
Chr7	1732381	1740367	7986	OsKitaake07g024300
Chr7	1744356	1750418	6062	OsKitaake07g024400
Chr7	1752276	1753743	1467	OsKitaake07g024701
Chr7	2617259	2620488	3229	OsKitaake07g034350
Chr7	3080890	3094746	13856	OsKitaake07g038700
Chr7	3129799	3134028	4229	OsKitaake07g038800
Chr7	3825753	3836137	10384	OsKitaake07g049200
Chr7	5212682	5220818	8136	OsKitaake07g063700
Chr7	5212682	5220818	8136	OsKitaake07g063800
Chr7	5353588	5367887	14299	OsKitaake07g065100
Chr7	5353588	5367887	14299	OsKitaake07g065200
Chr7	6153868	6193899	40031	OsKitaake07g073200
Chr7	6153868	6193899	40031	OsKitaake07g073300
Chr7	6197127	6204366	7239	OsKitaake07g073550
Chr7	12538345	12540170	1825	OsKitaake07g112000
Chr7	22887358	22892487	5129	OsKitaake07g197100
Chr7	24483493	24484172	679	OsKitaake07g218060
Chr7	24486729	24502432	15703	OsKitaake07g218080
Chr7	24486729	24502432	15703	OsKitaake07g218100
Chr7	24505685	24505893	208	OsKitaake07g218200
Chr7	24538861	24562010	23149	OsKitaake07g218700
Chr7	24563776	24565194	1418	OsKitaake07g218900
Chr7	25112878	25145361	32483	OsKitaake07g226100
Chr7	25112878	25145361	32483	OsKitaake07g226200
Chr7	25146034	25154427	8393	OsKitaake07g226300
Chr7	25159192	25163039	3847	OsKitaake07g226500
Chr7	25159192	25163039	3847	OsKitaake07g226600
Chr7	25239983	25247018	7035	OsKitaake07g228000
Chr7	27594764	27595205	441	OsKitaake07g257400
Chr7	27839288	27840561	1273	OsKitaake07g260400
Chr8	737352	741777	4425	OsKitaake08g010500
Chr8	1252371	1252937	566	OsKitaake08g016100
Chr8	3229939	3245751	15812	OsKitaake08g036200
Chr8	3229939	3245751	15812	OsKitaake08g036300
Chr8	3257270	3258674	1404	OsKitaake08g036500
Chr8	3257270	3258674	1404	OsKitaake08g036600
Chr8	10570951	10571235	284	OsKitaake08g095300
Chr8	14841095	14846241	5146	OsKitaake08g116200
Chr8	14904341	14907031	2690	OsKitaake08g116900
Chr8	15129677	15138947	9270	OsKitaake08g118400
Chr8	16570215	16620783	50568	OsKitaake08g127300
Chr8	16621413	16633550	12137	OsKitaake08g127400
Chr8	17131638	17179661	48023	OsKitaake08g130548
Chr8	17131638	17179661	48023	OsKitaake08g130564
Chr8	17185573	17188037	2464	OsKitaake08g130600
Chr8	19942470	19950117	7647	OsKitaake08g147100
Chr8	20341454	20343681	2227	OsKitaake08g150300
Chr8	20368778	20373400	4622	OsKitaake08g150800
Chr8	20368778	20373400	4622	OsKitaake08g150850
Chr8	20383418	20405901	22483	OsKitaake08g151000
Chr8	20383418	20405901	22483	OsKitaake08g151050
Chr8	20407715	20417748	10033	OsKitaake08g151100
Chr8	20407715	20417748	10033	OsKitaake08g151150
Chr8	20422382	20423118	736	OsKitaake08g151200
Chr8	20782212	20789284	7072	OsKitaake08g155200
Chr8	29313358	29321560	8202	OsKitaake08g255501
Chr9	7274763	7283554	8791	OsKitaake09g041900
Chr9	7412595	7431164	18569	OsKitaake09g042401
Chr9	7442465	7468358	25893	OsKitaake09g042500
Chr9	7525972	7529311	3339	OsKitaake09g042700
Chr9	7531598	7664920	133322	OsKitaake09g042801
Chr9	7531598	7664920	133322	OsKitaake09g042900
Chr9	7531598	7664920	133322	OsKitaake09g043000
Chr9	7531598	7664920	133322	OsKitaake09g043100
Chr9	7531598	7664920	133322	OsKitaake09g043200
Chr9	10243287	10298364	55077	OsKitaake09g063201
Chr9	10243287	10298364	55077	OsKitaake09g063300
Chr9	10243287	10298364	55077	OsKitaake09g063401
Chr9	10988960	10992736	3776	OsKitaake09g068200
Chr9	11003582	11006525	2943	OsKitaake09g068600
Chr9	11003582	11006525	2943	OsKitaake09g068700
Chr9	14753410	14757485	4075	OsKitaake09g100900
Chr9	14794044	14797814	3770	OsKitaake09g101200
Chr9	18936465	18944330	7865	OsKitaake09g151200
*We defined the truncation effect when the gene is affected by PAVs (≥ 87 bp).

## Sheet: Inversion-genes
Additional file 4. Comparative genomic analysis between KitaakeX and Nipponbare
Chromosome	Start position	End position	Size (bp)	Gene ID
Chr11	5116419	5118429	2010	OsKitaake11g064432
Chr2	18909189	18910083	894	OsKitaake02g185300
