# Supplementary material for: Genome sequence of the model rice variety KitaakeX
Source: BMC Genomics. 2019 Nov 27;20:905. doi: 10.1186/s12864-019-6262-4 (PMC6882167; doi:10.1186/s12864-019-6262-4)
Supplement: Supplementary file 5 — Additional file 5. Comparative genomic analysis between KitaakeX and Zhenshan97. SNPs, InDels, PAVs, Inversions, and genes affected by SNPs, IndDels, PAVs and Inversions are listed in this file. [file 12864_2019_6262_MOESM5_ESM.xlsx]

## Sheet: InDels
Additional file 5 Comparative genomic analysis between KitaakeX and Zhenshan97
Chromosome	Position	Size (bp)	Variation Type
Chr1	21852	1	Deletion
Chr1	23843	1	Deletion
Chr1	24641	2	Insertion
Chr1	24741	1	Deletion
Chr1	24774	1	Deletion
Chr1	24960	1	Deletion
Chr1	25678	12	Insertion
Chr1	25956	2	Insertion
Chr1	26401	1	Deletion
Chr1	26594	12	Insertion
Chr1	26779	2	Insertion
Chr1	28031	1	Deletion
Chr1	28135	1	Insertion
Chr1	28308	1	Insertion
Chr1	28894	1	Insertion
Chr1	28934	1	Insertion
Chr1	29079	1	Insertion
Chr1	29920	2	Insertion
Chr1	30004	1	Deletion
Chr1	30347	2	Insertion
Chr1	30926	1	Deletion
Chr1	30944	36	Deletion
Chr1	30984	6	Deletion
Chr1	31013	3	Deletion
Chr1	31202	19	Deletion
Chr1	31962	10	Deletion
Chr1	32028	4	Deletion
Chr1	32034	6	Deletion
Chr1	32080	1	Deletion
Chr1	32844	2	Deletion
Chr1	33275	1	Deletion
Chr1	33606	1	Deletion
Chr1	34982	1	Deletion
Chr1	37577	1	Insertion
Chr1	37744	1	Insertion
Chr1	37814	1	Insertion
Chr1	38297	2	Insertion
Chr1	38551	1	Insertion
Chr1	38681	1	Deletion
Chr1	38696	2	Deletion
Chr1	39630	9	Insertion
Chr1	41570	2	Deletion
Chr1	44982	2	Insertion
Chr1	45309	2	Insertion
Chr1	45493	1	Insertion
Chr1	66939	1	Deletion
Chr1	68059	5	Deletion
Chr1	68210	2	Deletion
Chr1	72074	1	Insertion
Chr1	75331	18	Insertion
Chr1	75873	3	Deletion
Chr1	78132	1	Insertion
Chr1	79313	6	Insertion
Chr1	79965	3	Insertion
Chr1	80018	3	Deletion
Chr1	80075	7	Insertion
Chr1	80245	1	Insertion
Chr1	80395	29	Deletion
Chr1	81055	1	Deletion
Chr1	81195	1	Deletion
Chr1	81581	1	Insertion
Chr1	84795	1	Deletion
Chr1	86067	1	Deletion
Chr1	86403	12	Insertion
Chr1	88880	1	Deletion
Chr1	89052	2	Insertion
Chr1	89258	2	Insertion
Chr1	92258	2	Insertion
Chr1	93021	10	Insertion
Chr1	93154	4	Insertion
Chr1	93156	2	Insertion
Chr1	93157	1	Insertion
Chr1	93162	1	Insertion
Chr1	93170	32	Insertion
Chr1	93175	16	Insertion
Chr1	93609	2	Insertion
Chr1	93865	52	Deletion
Chr1	93918	1	Deletion
Chr1	94285	1	Deletion
Chr1	95404	2	Insertion
Chr1	95659	1	Deletion
Chr1	95736	19	Insertion
Chr1	96163	1	Insertion
Chr1	96241	1	Deletion
Chr1	96913	1	Deletion
Chr1	97049	6	Deletion
Chr1	99156	1	Insertion
Chr1	99198	2	Insertion
Chr1	99521	10	Deletion
Chr1	101604	1	Insertion
Chr1	103041	3	Insertion
Chr1	105549	2	Deletion
Chr1	105553	2	Deletion
Chr1	105556	23	Deletion
Chr1	105580	1	Deletion
Chr1	105791	9	Deletion
Chr1	105802	1	Deletion
Chr1	105806	1	Deletion
Chr1	106192	8	Deletion
Chr1	106702	2	Insertion
Chr1	106853	1	Insertion
Chr1	106882	1	Deletion
Chr1	107054	1	Insertion
Chr1	107578	1	Deletion
Chr1	108308	2	Insertion
Chr1	108888	8	Insertion
Chr1	108890	7	Insertion
Chr1	110591	2	Insertion
Chr1	113579	1	Insertion
Chr1	113917	1	Insertion
Chr1	146970	1	Insertion
Chr1	149158	4	Insertion
Chr1	149356	1	Insertion
Chr1	149454	1	Deletion
Chr1	149482	1	Insertion
Chr1	149616	1	Deletion
Chr1	152004	1	Deletion
Chr1	153847	1	Deletion
Chr1	154986	12	Insertion
Chr1	155307	2	Insertion
Chr1	155401	1	Deletion
Chr1	155670	6	Insertion
Chr1	158065	3	Deletion
Chr1	158673	2	Insertion
Chr1	158851	2	Deletion
Chr1	159941	2	Insertion
Chr1	160392	7	Insertion
Chr1	161604	1	Deletion
Chr1	162167	3	Deletion
Chr1	162889	10	Insertion
Chr1	163607	1	Deletion
Chr1	164346	67	Deletion
Chr1	164747	1	Deletion
Chr1	165025	16	Deletion
Chr1	165448	6	Insertion
Chr1	165567	6	Deletion
Chr1	165775	2	Insertion
Chr1	168805	5	Deletion
Chr1	170453	6	Insertion
Chr1	170875	14	Deletion
Chr1	175382	1	Insertion
Chr1	176064	1	Insertion
Chr1	176900	3	Insertion
Chr1	177084	8	Insertion
Chr1	178102	19	Insertion
Chr1	178642	1	Insertion
Chr1	178737	1	Insertion
Chr1	179387	1	Deletion
Chr1	180653	2	Insertion
Chr1	181193	2	Insertion
Chr1	182115	1	Deletion
Chr1	182119	2	Deletion
Chr1	182123	11	Deletion
Chr1	182135	2	Deletion
Chr1	182139	5	Deletion
Chr1	182146	5	Deletion
Chr1	182152	5	Deletion
Chr1	184081	3	Deletion
Chr1	184160	3	Insertion
Chr1	184215	1	Insertion
Chr1	184414	2	Insertion
Chr1	185205	1	Insertion
Chr1	186908	3	Insertion
Chr1	187642	1	Deletion
Chr1	188134	2	Deletion
Chr1	188873	55	Deletion
Chr1	188959	1	Deletion
Chr1	189823	2	Deletion
Chr1	189827	4	Deletion
Chr1	189897	6	Insertion
Chr1	190155	2	Deletion
Chr1	190254	1	Insertion
Chr1	190479	8	Deletion
Chr1	190489	1	Deletion
Chr1	190494	17	Deletion
Chr1	190922	1	Deletion
Chr1	191129	1	Insertion
Chr1	191245	20	Insertion
Chr1	191393	1	Insertion
Chr1	191421	1	Deletion
Chr1	191563	1	Deletion
Chr1	191613	11	Insertion
Chr1	191751	1	Deletion
Chr1	191931	1	Deletion
Chr1	191939	1	Deletion
Chr1	191968	6	Insertion
Chr1	192161	4	Insertion
Chr1	192177	1	Deletion
Chr1	195052	1	Insertion
Chr1	195201	2	Insertion
Chr1	195434	6	Deletion
Chr1	195690	1	Insertion
Chr1	195982	1	Deletion
Chr1	196318	9	Deletion
Chr1	196354	1	Deletion
Chr1	196402	2	Insertion
Chr1	196848	1	Insertion
Chr1	196934	1	Insertion
Chr1	196994	7	Insertion
Chr1	197026	2	Insertion
Chr1	197220	1	Deletion
Chr1	197303	1	Deletion
Chr1	197314	1	Insertion
Chr1	197854	2	Deletion
Chr1	198303	1	Insertion
Chr1	200280	3	Deletion
Chr1	201043	1	Insertion
Chr1	202453	1	Insertion
Chr1	203324	2	Deletion
Chr1	204116	3	Insertion
Chr1	204131	4	Deletion
Chr1	204257	1	Insertion
Chr1	204358	1	Insertion
Chr1	204365	1	Deletion
Chr1	204370	4	Deletion
Chr1	204377	2	Deletion
Chr1	204384	1	Deletion
Chr1	204389	1	Deletion
Chr1	204395	2	Deletion
Chr1	204402	3	Deletion
Chr1	204677	10	Deletion
Chr1	204736	1	Deletion
Chr1	204819	12	Deletion
Chr1	204844	1	Insertion
Chr1	205672	1	Insertion
Chr1	208991	7	Deletion
Chr1	210841	1	Insertion
Chr1	210989	1	Insertion
Chr1	211272	10	Deletion
Chr1	211380	14	Deletion
Chr1	211515	1	Insertion
Chr1	211539	2	Deletion
Chr1	211603	2	Deletion
Chr1	212592	5	Deletion
Chr1	212605	1	Deletion
Chr1	214804	13	Insertion
Chr1	215221	2	Insertion
Chr1	215229	3	Insertion
Chr1	215231	6	Insertion
Chr1	215232	4	Insertion
Chr1	215235	2	Insertion
Chr1	215237	5	Insertion
Chr1	215674	2	Deletion
Chr1	215680	1	Deletion
Chr1	215746	10	Deletion
Chr1	216166	9	Insertion
Chr1	216227	6	Deletion
Chr1	222694	6	Deletion
Chr1	222918	1	Deletion
Chr1	223315	9	Deletion
Chr1	225321	1	Insertion
Chr1	228298	1	Insertion
Chr1	228309	1	Deletion
Chr1	228369	1	Insertion
Chr1	228473	1	Insertion
Chr1	229433	1	Deletion
Chr1	229473	3	Insertion
Chr1	229476	6	Insertion
Chr1	229906	6	Insertion
Chr1	230596	3	Deletion
Chr1	230605	2	Deletion
Chr1	230613	2	Deletion
Chr1	230618	1	Deletion
Chr1	230621	1	Deletion
Chr1	230680	9	Deletion
Chr1	230830	12	Deletion
Chr1	231121	12	Deletion
Chr1	231324	2	Insertion
Chr1	231770	4	Deletion
Chr1	232160	5	Deletion
Chr1	232167	1	Deletion
Chr1	232463	2	Deletion
Chr1	235598	4	Deletion
Chr1	235975	1	Deletion
Chr1	236959	1	Deletion
Chr1	236972	1	Insertion
Chr1	237308	1	Insertion
Chr1	238053	1	Deletion
Chr1	238204	1	Deletion
Chr1	238269	5	Deletion
Chr1	238512	1	Deletion
Chr1	238514	1	Deletion
Chr1	238517	3	Deletion
Chr1	238522	3	Deletion
Chr1	238527	4	Deletion
Chr1	238532	1	Deletion
Chr1	238737	2	Insertion
Chr1	239724	1	Deletion
Chr1	240457	1	Deletion
Chr1	240738	15	Insertion
Chr1	240810	4	Insertion
Chr1	240915	14	Insertion
Chr1	240967	3	Deletion
Chr1	241100	33	Deletion
Chr1	241470	33	Deletion
Chr1	241741	15	Insertion
Chr1	242013	24	Deletion
Chr1	242647	1	Insertion
Chr1	242769	4	Deletion
Chr1	242920	1	Insertion
Chr1	243185	24	Deletion
Chr1	243227	1	Insertion
Chr1	243415	1	Insertion
Chr1	243459	5	Deletion
Chr1	243795	5	Deletion
Chr1	243885	21	Insertion
Chr1	244486	1	Insertion
Chr1	245331	3	Deletion
Chr1	245567	1	Insertion
Chr1	245623	1	Deletion
Chr1	245626	1	Deletion
Chr1	248270	4	Insertion
Chr1	248595	30	Deletion
Chr1	248673	11	Deletion
Chr1	249318	2	Deletion
Chr1	249554	1	Deletion
Chr1	250153	1	Deletion
Chr1	250297	1	Insertion
Chr1	250298	1	Insertion
Chr1	250566	11	Deletion
Chr1	250756	2	Deletion
Chr1	250938	10	Deletion
Chr1	251884	1	Deletion
Chr1	252576	8	Deletion
Chr1	253415	2	Insertion
Chr1	253884	3	Deletion
Chr1	254109	4	Insertion
Chr1	254168	2	Insertion
Chr1	254351	1	Deletion
Chr1	254629	30	Insertion
Chr1	254746	2	Insertion
Chr1	255699	9	Deletion
Chr1	255734	6	Insertion
Chr1	255977	13	Deletion
Chr1	255992	29	Deletion
Chr1	256575	1	Deletion
Chr1	256585	5	Deletion
Chr1	256918	13	Deletion
Chr1	256970	11	Deletion
Chr1	257002	3	Insertion
Chr1	257769	7	Deletion
Chr1	258263	4	Insertion
Chr1	258614	1	Insertion
Chr1	259462	9	Deletion
Chr1	262076	1	Insertion
Chr1	263370	1	Insertion
Chr1	265678	1	Deletion
Chr1	265879	4	Deletion
Chr1	266098	1	Deletion
Chr1	270133	20	Deletion
Chr1	270508	11	Deletion
Chr1	270558	6	Insertion
Chr1	270932	11	Deletion
Chr1	271134	1	Deletion
Chr1	271222	26	Insertion
Chr1	271400	1	Deletion
Chr1	271580	1	Deletion
Chr1	272124	1	Insertion
Chr1	272961	13	Insertion
Chr1	273034	3	Insertion
Chr1	273041	6	Insertion
Chr1	273043	1	Insertion
Chr1	273851	1	Deletion
Chr1	273959	1	Insertion
Chr1	276196	1	Insertion
Chr1	279327	3	Deletion
Chr1	280195	28	Deletion
Chr1	280311	1	Insertion
Chr1	280640	1	Insertion
Chr1	280888	2	Deletion
Chr1	281069	1	Insertion
Chr1	281963	4	Insertion
Chr1	283658	3	Insertion
Chr1	284183	3	Insertion
Chr1	285183	3	Insertion
Chr1	285314	6	Deletion
Chr1	285456	3	Insertion
Chr1	285469	2	Deletion
Chr1	285477	2	Deletion
Chr1	285482	2	Deletion
Chr1	285506	6	Deletion
Chr1	285612	15	Deletion
Chr1	285741	4	Insertion
Chr1	285742	1	Insertion
Chr1	285748	4	Insertion
Chr1	285787	4	Deletion
Chr1	285798	3	Deletion
Chr1	285805	8	Deletion
Chr1	285814	1	Deletion
Chr1	285819	1	Deletion
Chr1	285868	4	Insertion
Chr1	286096	2	Insertion
Chr1	286097	2	Insertion
Chr1	286101	1	Insertion
Chr1	286103	1	Insertion
Chr1	286104	1	Insertion
Chr1	286131	19	Insertion
Chr1	286133	1	Insertion
Chr1	286622	4	Insertion
Chr1	286734	2	Deletion
Chr1	286790	2	Deletion
Chr1	286794	1	Deletion
Chr1	286796	5	Deletion
Chr1	286805	2	Deletion
Chr1	286820	4	Insertion
Chr1	287535	2	Deletion
Chr1	287538	1	Deletion
Chr1	287545	1	Insertion
Chr1	287656	2	Insertion
Chr1	288024	5	Insertion
Chr1	288195	2	Deletion
Chr1	288198	8	Deletion
Chr1	288208	1	Deletion
Chr1	288219	14	Deletion
Chr1	288536	1	Insertion
Chr1	289412	12	Deletion
Chr1	289640	1	Insertion
Chr1	289728	27	Deletion
Chr1	289757	8	Deletion
Chr1	289768	1	Deletion
Chr1	289953	1	Deletion
Chr1	296947	11	Insertion
Chr1	297302	3	Deletion
Chr1	298310	4	Insertion
Chr1	302536	1	Deletion
Chr1	303032	1	Deletion
Chr1	303053	1	Deletion
Chr1	304014	12	Deletion
Chr1	307182	14	Insertion
Chr1	308579	11	Deletion
Chr1	308849	1	Deletion
Chr1	308954	1	Insertion
Chr1	309591	1	Insertion
Chr1	310104	8	Insertion
Chr1	311178	1	Insertion
Chr1	311187	1	Insertion
Chr1	311361	2	Insertion
Chr1	311803	1	Insertion
Chr1	312579	1	Insertion
Chr1	312686	10	Insertion
Chr1	313185	9	Insertion
Chr1	313187	4	Insertion
Chr1	313687	29	Insertion
Chr1	313741	1	Deletion
Chr1	313743	2	Deletion
Chr1	314138	1	Deletion
Chr1	314171	10	Deletion
Chr1	314424	1	Deletion
Chr1	314602	17	Insertion
Chr1	314611	5	Insertion
Chr1	314619	7	Insertion
Chr1	314623	1	Insertion
Chr1	314628	1	Insertion
Chr1	314630	2	Insertion
Chr1	314632	2	Insertion
Chr1	314633	2	Insertion
Chr1	314634	1	Insertion
Chr1	314673	1	Insertion
Chr1	315019	1	Insertion
Chr1	316355	36	Deletion
Chr1	316434	8	Insertion
Chr1	317064	1	Insertion
Chr1	317379	60	Insertion
Chr1	317417	1	Deletion
Chr1	321378	3	Deletion
Chr1	323582	13	Deletion
Chr1	327008	31	Insertion
Chr1	329464	4	Insertion
Chr1	332222	2	Deletion
Chr1	332460	1	Deletion
Chr1	332522	1	Insertion
Chr1	332838	4	Insertion
Chr1	333392	1	Deletion
Chr1	333424	1	Deletion
Chr1	333504	25	Deletion
Chr1	333703	2	Deletion
Chr1	333708	2	Deletion
Chr1	333712	1	Deletion
Chr1	333714	1	Deletion
Chr1	333750	2	Insertion
Chr1	333792	2	Deletion
Chr1	333847	24	Insertion
Chr1	333981	7	Insertion
Chr1	334049	2	Insertion
Chr1	334164	7	Insertion
Chr1	334190	11	Deletion
Chr1	334251	5	Insertion
Chr1	334263	7	Deletion
Chr1	334272	2	Deletion
Chr1	334679	3	Insertion
Chr1	334683	2	Deletion
Chr1	334715	2	Deletion
Chr1	334764	5	Deletion
Chr1	334770	1	Deletion
Chr1	334773	3	Deletion
Chr1	334889	1	Deletion
Chr1	335178	1	Insertion
Chr1	335179	4	Insertion
Chr1	335180	3	Insertion
Chr1	335181	4	Insertion
Chr1	335183	1	Insertion
Chr1	335185	1	Insertion
Chr1	335188	9	Insertion
Chr1	335279	7	Insertion
Chr1	335577	1	Insertion
Chr1	335613	3	Deletion
Chr1	335617	2	Deletion
Chr1	335620	1	Deletion
Chr1	335622	1	Deletion
Chr1	335625	1	Insertion
Chr1	335707	2	Insertion
Chr1	335838	1	Insertion
Chr1	335870	3	Deletion
Chr1	336106	1	Deletion
Chr1	337183	2	Deletion
Chr1	337188	12	Deletion
Chr1	337202	13	Deletion
Chr1	339472	4	Insertion
Chr1	339766	1	Deletion
Chr1	339935	20	Insertion
Chr1	340021	2	Deletion
Chr1	340257	1	Insertion
Chr1	341251	14	Deletion
Chr1	341742	11	Insertion
Chr1	342014	43	Insertion
Chr1	342937	10	Insertion
Chr1	343506	4	Deletion
Chr1	343579	3	Insertion
Chr1	343660	14	Insertion
Chr1	344745	33	Insertion
Chr1	345853	1	Insertion
Chr1	346499	6	Insertion
Chr1	346731	10	Insertion
Chr1	346941	9	Deletion
Chr1	347504	12	Deletion
Chr1	347714	9	Deletion
Chr1	347970	18	Deletion
Chr1	348045	3	Insertion
Chr1	348625	1	Insertion
Chr1	348650	2	Deletion
Chr1	348795	1	Deletion
Chr1	349272	1	Deletion
Chr1	349828	13	Insertion
Chr1	349831	1	Insertion
Chr1	349833	2	Insertion
Chr1	349835	3	Insertion
Chr1	349836	4	Insertion
Chr1	350020	1	Deletion
Chr1	350123	1	Deletion
Chr1	350168	2	Insertion
Chr1	350169	1	Insertion
Chr1	355353	6	Insertion
Chr1	357743	1	Insertion
Chr1	361322	3	Insertion
Chr1	361742	1	Deletion
Chr1	362349	1	Deletion
Chr1	366226	1	Insertion
Chr1	366587	1	Deletion
Chr1	368393	1	Deletion
Chr1	369771	1	Insertion
Chr1	370574	3	Deletion
Chr1	370709	2	Deletion
Chr1	371784	2	Insertion
Chr1	371786	4	Insertion
Chr1	377194	1	Deletion
Chr1	381377	1	Deletion
Chr1	382894	1	Deletion
Chr1	385220	4	Insertion
Chr1	385479	5	Insertion
Chr1	385680	3	Deletion
Chr1	386053	3	Deletion
Chr1	386059	27	Deletion
Chr1	386088	1	Deletion
Chr1	386091	4	Deletion
Chr1	386269	1	Insertion
Chr1	389333	2	Deletion
Chr1	389718	2	Deletion
Chr1	389852	30	Deletion
Chr1	393959	1	Insertion
Chr1	395424	6	Deletion
Chr1	395959	1	Deletion
Chr1	397510	2	Insertion
Chr1	397522	1	Insertion
Chr1	397616	5	Deletion
Chr1	397624	2	Deletion
Chr1	397641	1	Deletion
Chr1	397872	1	Deletion
Chr1	398135	12	Deletion
Chr1	398509	1	Insertion
Chr1	398669	1	Insertion
Chr1	401033	9	Insertion
Chr1	401306	1	Insertion
Chr1	401709	1	Deletion
Chr1	401722	1	Insertion
Chr1	401746	1	Insertion
Chr1	401747	1	Insertion
Chr1	401748	1	Insertion
Chr1	402123	2	Insertion
Chr1	402198	1	Deletion
Chr1	402234	1	Insertion
Chr1	402795	1	Deletion
Chr1	403381	1	Insertion
Chr1	404179	1	Insertion
Chr1	404287	13	Deletion
Chr1	404323	59	Deletion
Chr1	405071	3	Insertion
Chr1	405856	2	Deletion
Chr1	405926	3	Insertion
Chr1	406193	1	Insertion
Chr1	406573	11	Deletion
Chr1	409849	1	Deletion
Chr1	410294	1	Deletion
Chr1	411094	6	Insertion
Chr1	411126	3	Deletion
Chr1	414246	14	Insertion
Chr1	414770	6	Deletion
Chr1	414800	1	Deletion
Chr1	415062	9	Insertion
Chr1	416056	1	Deletion
Chr1	417038	3	Deletion
Chr1	417085	1	Insertion
Chr1	417275	1	Insertion
Chr1	417285	6	Deletion
Chr1	417382	1	Insertion
Chr1	417401	1	Insertion
Chr1	417715	1	Deletion
Chr1	417723	1	Deletion
Chr1	417791	2	Deletion
Chr1	417839	1	Insertion
Chr1	417952	9	Deletion
Chr1	418128	1	Deletion
Chr1	418325	3	Insertion
Chr1	419875	7	Insertion
Chr1	420087	13	Insertion
Chr1	420088	3	Insertion
Chr1	420144	1	Deletion
Chr1	421079	4	Deletion
Chr1	421353	4	Deletion
Chr1	421726	28	Insertion
Chr1	421876	25	Insertion
Chr1	422062	8	Insertion
Chr1	422253	4	Deletion
Chr1	422277	1	Insertion
Chr1	422371	22	Deletion
Chr1	422447	1	Insertion
Chr1	422453	2	Insertion
Chr1	422496	2	Deletion
Chr1	422922	2	Deletion
Chr1	422931	4	Deletion
Chr1	422940	1	Deletion
Chr1	422942	1	Deletion
Chr1	422946	1	Deletion
Chr1	423024	1	Deletion
Chr1	423232	1	Insertion
Chr1	423233	1	Insertion
Chr1	423293	1	Deletion
Chr1	423452	1	Insertion
Chr1	423754	34	Insertion
Chr1	423925	1	Insertion
Chr1	424018	1	Deletion
Chr1	424050	1	Insertion
Chr1	424241	2	Insertion
Chr1	424382	1	Insertion
Chr1	424469	7	Deletion
Chr1	424477	1	Deletion
Chr1	424487	12	Deletion
Chr1	426079	4	Deletion
Chr1	426271	1	Deletion
Chr1	426307	1	Deletion
Chr1	426315	1	Deletion
Chr1	426317	1	Deletion
Chr1	426332	2	Deletion
Chr1	426415	1	Deletion
Chr1	426577	1	Insertion
Chr1	426631	5	Insertion
Chr1	427005	1	Insertion
Chr1	427027	1	Insertion
Chr1	427040	4	Deletion
Chr1	427161	1	Insertion
Chr1	427186	1	Deletion
Chr1	427204	1	Insertion
Chr1	427326	8	Insertion
Chr1	427542	3	Deletion
Chr1	427570	8	Insertion
Chr1	427573	3	Insertion
Chr1	427575	4	Insertion
Chr1	427936	5	Insertion
Chr1	427937	2	Insertion
Chr1	427939	15	Insertion
Chr1	428364	1	Deletion
Chr1	428580	2	Insertion
Chr1	428801	28	Insertion
Chr1	429002	1	Insertion
Chr1	430483	1	Insertion
Chr1	430583	5	Insertion
Chr1	430819	1	Deletion
Chr1	432052	1	Deletion
Chr1	434961	6	Deletion
Chr1	435219	1	Deletion
Chr1	435234	1	Deletion
Chr1	435403	1	Insertion
Chr1	435692	23	Insertion
Chr1	435744	1	Insertion
Chr1	436232	3	Insertion
Chr1	436342	2	Insertion
Chr1	436562	1	Deletion
Chr1	437284	14	Deletion
Chr1	437687	1	Insertion
Chr1	438498	2	Deletion
Chr1	438542	7	Deletion
Chr1	438705	1	Deletion
Chr1	438950	2	Deletion
Chr1	439048	2	Insertion
Chr1	439200	1	Deletion
Chr1	441744	2	Deletion
Chr1	442086	3	Deletion
Chr1	442396	3	Deletion
Chr1	442411	1	Deletion
Chr1	443135	1	Deletion
Chr1	443781	2	Deletion
Chr1	443851	2	Insertion
Chr1	444210	1	Insertion
Chr1	444215	1	Deletion
Chr1	444526	12	Deletion
Chr1	445073	1	Deletion
Chr1	445214	2	Deletion
Chr1	445455	10	Insertion
Chr1	445734	4	Deletion
Chr1	445843	1	Deletion
Chr1	445846	1	Deletion
Chr1	445854	1	Deletion
Chr1	445958	5	Deletion
Chr1	446579	1	Deletion
Chr1	446618	1	Insertion
Chr1	446686	1	Insertion
Chr1	446687	2	Insertion
Chr1	446751	6	Insertion
Chr1	446763	24	Insertion
Chr1	446814	2	Deletion
Chr1	448352	2	Insertion
Chr1	448371	1	Insertion
Chr1	448403	1	Insertion
Chr1	448412	1	Deletion
Chr1	448620	3	Insertion
Chr1	448693	18	Insertion
Chr1	449965	1	Insertion
Chr1	450012	1	Deletion
Chr1	450279	1	Insertion
Chr1	450906	7	Insertion
Chr1	451903	23	Deletion
Chr1	451936	2	Deletion
Chr1	452044	1	Deletion
Chr1	452153	1	Insertion
Chr1	452217	2	Insertion
Chr1	452221	14	Insertion
Chr1	452223	2	Insertion
Chr1	452224	3	Insertion
Chr1	452225	2	Insertion
Chr1	452307	11	Insertion
Chr1	452465	8	Deletion
Chr1	452483	1	Deletion
Chr1	452734	3	Deletion
Chr1	452775	4	Deletion
Chr1	452965	17	Deletion
Chr1	453025	4	Deletion
Chr1	453495	2	Deletion
Chr1	454044	1	Insertion
Chr1	454462	1	Insertion
Chr1	454727	16	Deletion
Chr1	454746	1	Deletion
Chr1	455685	12	Deletion
Chr1	455698	1	Deletion
Chr1	455712	4	Deletion
Chr1	455717	3	Deletion
Chr1	455721	1	Deletion
Chr1	455724	12	Deletion
Chr1	459005	1	Deletion
Chr1	459014	1	Deletion
Chr1	459051	3	Deletion
Chr1	459072	2	Deletion
Chr1	459180	3	Insertion
Chr1	459495	1	Deletion
Chr1	462488	1	Insertion
Chr1	464351	4	Deletion
Chr1	464464	3	Insertion
Chr1	464569	5	Deletion
Chr1	464769	10	Deletion
Chr1	464785	1	Deletion
Chr1	464788	5	Deletion
Chr1	464796	3	Deletion
Chr1	464882	3	Deletion
Chr1	464894	1	Insertion
Chr1	464941	5	Deletion
Chr1	464971	5	Insertion
Chr1	465044	1	Insertion
Chr1	465137	1	Insertion
Chr1	465175	1	Insertion
Chr1	465316	1	Insertion
Chr1	465356	1	Deletion
Chr1	465380	13	Insertion
Chr1	465792	1	Insertion
Chr1	465807	1	Insertion
Chr1	465888	1	Deletion
Chr1	465960	2	Deletion
Chr1	466128	1	Insertion
Chr1	466203	2	Insertion
Chr1	466260	1	Insertion
Chr1	466409	1	Deletion
Chr1	466552	1	Insertion
Chr1	467971	1	Deletion
Chr1	467973	1	Deletion
Chr1	467978	2	Deletion
Chr1	468105	4	Deletion
Chr1	468182	3	Deletion
Chr1	468188	3	Deletion
Chr1	468262	2	Insertion
Chr1	468367	4	Deletion
Chr1	469392	1	Insertion
Chr1	469421	2	Deletion
Chr1	469470	1	Insertion
Chr1	469818	2	Insertion
Chr1	469870	1	Insertion
Chr1	469986	4	Deletion
Chr1	470209	2	Deletion
Chr1	470295	3	Insertion
Chr1	470337	6	Insertion
Chr1	470456	15	Deletion
Chr1	470492	12	Deletion
Chr1	470612	4	Deletion
Chr1	470625	4	Insertion
Chr1	470673	8	Insertion
Chr1	470958	2	Insertion
Chr1	470960	2	Insertion
Chr1	471059	1	Insertion
Chr1	471230	46	Deletion
Chr1	471312	4	Deletion
Chr1	471511	3	Deletion
Chr1	471557	4	Deletion
Chr1	471563	2	Deletion
Chr1	471797	21	Deletion
Chr1	471831	4	Deletion
Chr1	471847	2	Deletion
Chr1	471861	1	Deletion
Chr1	471894	5	Insertion
Chr1	471895	1	Insertion
Chr1	471947	3	Deletion
Chr1	472029	1	Insertion
Chr1	472606	2	Deletion
Chr1	472714	2	Deletion
Chr1	473056	8	Insertion
Chr1	473325	5	Deletion
Chr1	473494	8	Insertion
Chr1	473663	16	Insertion
Chr1	473774	1	Insertion
Chr1	476087	1	Deletion
Chr1	476287	1	Insertion
Chr1	476523	1	Deletion
Chr1	476558	12	Deletion
Chr1	477468	1	Insertion
Chr1	477677	1	Deletion
Chr1	479029	1	Deletion
Chr1	479058	1	Deletion
Chr1	479084	1	Insertion
Chr1	479382	1	Deletion
Chr1	479507	2	Deletion
Chr1	506365	1	Deletion
Chr1	506468	11	Deletion
Chr1	506581	2	Deletion
Chr1	506585	1	Deletion
Chr1	506700	20	Deletion
Chr1	506788	11	Deletion
Chr1	506831	1	Insertion
Chr1	507298	10	Deletion
Chr1	507634	8	Deletion
Chr1	507934	31	Insertion
Chr1	508495	1	Insertion
Chr1	509060	5	Insertion
Chr1	509410	4	Deletion
Chr1	509416	4	Deletion
Chr1	509422	6	Deletion
Chr1	510082	10	Deletion
Chr1	511131	1	Insertion
Chr1	511482	2	Deletion
Chr1	511487	2	Deletion
Chr1	511562	76	Insertion
Chr1	515943	18	Deletion
Chr1	515963	1	Deletion
Chr1	515965	1	Deletion
Chr1	516606	3	Insertion
Chr1	521071	3	Insertion
Chr1	522919	8	Deletion
Chr1	524232	3	Deletion
Chr1	524236	1	Deletion
Chr1	525365	9	Insertion
Chr1	525551	29	Deletion
Chr1	525632	1	Deletion
Chr1	525640	4	Deletion
Chr1	525668	2	Insertion
Chr1	525676	1	Deletion
Chr1	526304	2	Insertion
Chr1	526305	1	Insertion
Chr1	526306	2	Insertion
Chr1	526309	2	Insertion
Chr1	526639	3	Deletion
Chr1	527085	3	Deletion
Chr1	529257	1	Deletion
Chr1	529831	1	Deletion
Chr1	529924	21	Deletion
Chr1	530361	1	Insertion
Chr1	531506	5	Insertion
Chr1	533006	3	Insertion
Chr1	534115	6	Deletion
Chr1	534411	1	Insertion
Chr1	534499	2	Deletion
Chr1	534700	2	Deletion
Chr1	534721	10	Insertion
Chr1	534818	1	Insertion
Chr1	534954	1	Insertion
Chr1	535007	2	Insertion
Chr1	537482	1	Deletion
Chr1	538610	1	Deletion
Chr1	538862	9	Deletion
Chr1	539842	2	Deletion
Chr1	542317	2	Deletion
Chr1	542403	1	Deletion
Chr1	544018	1	Insertion
Chr1	546646	2	Insertion
Chr1	551386	1	Insertion
Chr1	551583	10	Insertion
Chr1	552691	1	Deletion
Chr1	556291	11	Insertion
Chr1	556614	1	Insertion
Chr1	557113	5	Insertion
Chr1	557512	2	Deletion
Chr1	557601	2	Insertion
Chr1	558288	12	Deletion
Chr1	558476	11	Deletion
Chr1	558634	5	Deletion
Chr1	558721	2	Insertion
Chr1	558814	1	Insertion
Chr1	558816	2	Insertion
Chr1	558822	2	Insertion
Chr1	558826	2	Insertion
Chr1	558835	1	Insertion
Chr1	558854	6	Insertion
Chr1	558859	3	Insertion
Chr1	558866	1	Insertion
Chr1	558867	1	Insertion
Chr1	558881	1	Deletion
Chr1	558979	1	Insertion
Chr1	559195	3	Insertion
Chr1	559321	9	Insertion
Chr1	559417	1	Deletion
Chr1	559542	1	Deletion
Chr1	559831	1	Deletion
Chr1	559989	1	Deletion
Chr1	560146	1	Deletion
Chr1	560168	1	Insertion
Chr1	560393	2	Deletion
Chr1	560404	1	Deletion
Chr1	560448	1	Insertion
Chr1	560478	1	Insertion
Chr1	560503	1	Deletion
Chr1	560546	2	Insertion
Chr1	560625	1	Insertion
Chr1	560672	1	Insertion
Chr1	560717	1	Insertion
Chr1	560776	1	Deletion
Chr1	560806	1	Deletion
Chr1	560813	4	Deletion
Chr1	560991	8	Insertion
Chr1	561086	3	Insertion
Chr1	561308	1	Deletion
Chr1	561443	6	Insertion
Chr1	561974	1	Deletion
Chr1	563076	16	Insertion
Chr1	563121	2	Deletion
Chr1	563383	1	Deletion
Chr1	563514	5	Insertion
Chr1	563519	2	Insertion
Chr1	563521	1	Insertion
Chr1	563522	1	Insertion
Chr1	563808	1	Deletion
Chr1	565144	1	Deletion
Chr1	565543	2	Insertion
Chr1	565691	9	Insertion
Chr1	565944	2	Insertion
Chr1	566009	1	Insertion
Chr1	566021	1	Deletion
Chr1	566023	1	Insertion
Chr1	566869	2	Insertion
Chr1	567293	2	Insertion
Chr1	567568	15	Deletion
Chr1	567731	2	Deletion
Chr1	568063	9	Deletion
Chr1	568135	1	Insertion
Chr1	569782	3	Insertion
Chr1	569794	2	Deletion
Chr1	570254	1	Deletion
Chr1	571277	1	Deletion
Chr1	572083	2	Deletion
Chr1	573176	1	Deletion
Chr1	574298	1	Insertion
Chr1	574929	1	Deletion
Chr1	575388	1	Insertion
Chr1	575479	34	Deletion
Chr1	575515	2	Deletion
Chr1	575580	14	Insertion
Chr1	575812	27	Insertion
Chr1	575966	1	Deletion
Chr1	576547	1	Deletion
Chr1	577341	1	Insertion
Chr1	577352	4	Insertion
Chr1	577996	44	Deletion
Chr1	578042	3	Deletion
Chr1	578047	9	Deletion
Chr1	578059	2	Deletion
Chr1	578063	8	Deletion
Chr1	578814	3	Insertion
Chr1	580482	1	Insertion
Chr1	581105	1	Insertion
Chr1	585686	3	Deletion
Chr1	586920	1	Deletion
Chr1	586998	1	Insertion
Chr1	587650	2	Insertion
Chr1	588488	1	Insertion
Chr1	588639	1	Deletion
Chr1	588885	1	Deletion
Chr1	589377	2	Deletion
Chr1	589745	1	Insertion
Chr1	589768	1	Deletion
Chr1	589805	1	Insertion
Chr1	590535	1	Insertion
Chr1	592436	2	Insertion
Chr1	593181	1	Insertion
Chr1	595446	1	Insertion
Chr1	596483	1	Deletion
Chr1	597457	1	Insertion
Chr1	599025	4	Insertion
Chr1	601268	1	Deletion
Chr1	601488	4	Insertion
Chr1	601508	1	Insertion
Chr1	601647	1	Deletion
Chr1	601995	1	Insertion
Chr1	602003	1	Insertion
Chr1	602006	8	Insertion
Chr1	602524	10	Deletion
Chr1	602535	2	Deletion
Chr1	602541	1	Insertion
Chr1	602754	1	Deletion
Chr1	603274	1	Deletion
Chr1	603454	1	Deletion
Chr1	604280	2	Deletion
Chr1	604284	1	Deletion
Chr1	604556	9	Deletion
Chr1	607833	9	Insertion
Chr1	608326	1	Deletion
Chr1	608436	2	Deletion
Chr1	608463	2	Insertion
Chr1	608916	12	Deletion
Chr1	610981	3	Deletion
Chr1	611235	4	Deletion
Chr1	611241	11	Deletion
Chr1	611254	4	Deletion
Chr1	611306	8	Deletion
Chr1	611608	4	Insertion
Chr1	612924	8	Deletion
Chr1	612934	2	Deletion
Chr1	613025	1	Insertion
Chr1	613178	10	Insertion
Chr1	613212	6	Insertion
Chr1	613216	8	Insertion
Chr1	613262	8	Insertion
Chr1	613264	28	Insertion
Chr1	613266	5	Insertion
Chr1	613387	1	Insertion
Chr1	613857	10	Insertion
Chr1	616824	3	Deletion
Chr1	619558	1	Insertion
Chr1	619583	1	Deletion
Chr1	620754	2	Deletion
Chr1	621811	2	Deletion
Chr1	622175	6	Deletion
Chr1	622183	4	Deletion
Chr1	622385	18	Insertion
Chr1	624683	5	Deletion
Chr1	624719	10	Deletion
Chr1	625706	1	Deletion
Chr1	625708	1	Deletion
Chr1	626279	3	Deletion
Chr1	627347	5	Deletion
Chr1	631055	3	Insertion
Chr1	631844	3	Deletion
Chr1	633067	12	Deletion
Chr1	634489	1	Insertion
Chr1	634752	1	Insertion
Chr1	634943	2	Insertion
Chr1	635374	1	Insertion
Chr1	635760	62	Deletion
Chr1	635856	1	Deletion
Chr1	636165	3	Deletion
Chr1	636338	3	Deletion
Chr1	637196	20	Insertion
Chr1	638347	1	Insertion
Chr1	638521	1	Deletion
Chr1	638591	1	Deletion
Chr1	638681	1	Deletion
Chr1	638748	1	Insertion
Chr1	638894	1	Insertion
Chr1	638945	1	Deletion
Chr1	639490	24	Insertion
Chr1	640115	4	Deletion
Chr1	640191	1	Deletion
Chr1	640246	1	Deletion
Chr1	640305	5	Insertion
Chr1	640403	3	Deletion
Chr1	640839	10	Deletion
Chr1	640850	2	Deletion
Chr1	641238	10	Deletion
Chr1	641505	5	Insertion
Chr1	641681	16	Deletion
Chr1	641793	4	Insertion
Chr1	642083	4	Insertion
Chr1	642529	1	Insertion
Chr1	642531	1	Insertion
Chr1	642535	1	Insertion
Chr1	642539	1	Deletion
Chr1	642542	1	Insertion
Chr1	643277	5	Insertion
Chr1	643597	8	Deletion
Chr1	643775	1	Deletion
Chr1	643886	2	Deletion
Chr1	644312	4	Deletion
Chr1	644545	2	Deletion
Chr1	644995	4	Deletion
Chr1	645199	15	Deletion
Chr1	645258	2	Insertion
Chr1	645356	15	Insertion
Chr1	645547	2	Deletion
Chr1	646259	1	Insertion
Chr1	646337	2	Deletion
Chr1	646455	13	Deletion
Chr1	646797	2	Insertion
Chr1	647439	1	Insertion
Chr1	647702	2	Insertion
Chr1	647868	12	Deletion
Chr1	648164	1	Insertion
Chr1	648464	1	Deletion
Chr1	648907	1	Insertion
Chr1	649114	4	Deletion
Chr1	649120	8	Deletion
Chr1	649130	5	Deletion
Chr1	649407	3	Insertion
Chr1	649446	3	Insertion
Chr1	653563	1	Deletion
Chr1	655131	1	Deletion
Chr1	656554	17	Deletion
Chr1	657474	2	Insertion
Chr1	658694	2	Deletion
Chr1	659229	2	Insertion
Chr1	659802	1	Deletion
Chr1	661219	2	Deletion
Chr1	661594	2	Insertion
Chr1	661598	1	Deletion
Chr1	661600	1	Deletion
Chr1	661602	1	Deletion
Chr1	661689	2	Deletion
Chr1	662122	1	Deletion
Chr1	662142	1	Insertion
Chr1	662339	4	Insertion
Chr1	663303	2	Deletion
Chr1	663837	2	Deletion
Chr1	663881	1	Insertion
Chr1	667230	9	Deletion
Chr1	667599	1	Deletion
Chr1	667665	1	Deletion
Chr1	667712	1	Deletion
Chr1	667714	1	Deletion
Chr1	667811	2	Insertion
Chr1	667983	26	Deletion
Chr1	668105	2	Deletion
Chr1	668158	1	Insertion
Chr1	668223	14	Insertion
Chr1	668225	2	Insertion
Chr1	668308	4	Deletion
Chr1	672187	1	Deletion
Chr1	672368	6	Insertion
Chr1	672463	3	Deletion
Chr1	672942	1	Deletion
Chr1	673230	1	Insertion
Chr1	673869	1	Deletion
Chr1	674892	6	Deletion
Chr1	676126	1	Deletion
Chr1	676199	5	Deletion
Chr1	680031	3	Deletion
Chr1	680165	4	Deletion
Chr1	682012	1	Insertion
Chr1	683237	7	Deletion
Chr1	683325	3	Insertion
Chr1	683366	1	Deletion
Chr1	683370	1	Deletion
Chr1	683372	2	Deletion
Chr1	683380	3	Deletion
Chr1	683384	1	Deletion
Chr1	683440	1	Deletion
Chr1	684777	1	Insertion
Chr1	684819	1	Deletion
Chr1	685096	21	Deletion
Chr1	685438	1	Deletion
Chr1	685474	1	Insertion
Chr1	685722	1	Deletion
Chr1	685740	1	Deletion
Chr1	686179	5	Deletion
Chr1	686222	1	Deletion
Chr1	686395	2	Deletion
Chr1	686490	1	Deletion
Chr1	686830	3	Deletion
Chr1	687010	6	Deletion
Chr1	687412	1	Deletion
Chr1	687476	1	Insertion
Chr1	687563	3	Insertion
Chr1	687566	5	Insertion
Chr1	687568	3	Insertion
Chr1	687615	2	Insertion
Chr1	687771	1	Deletion
Chr1	687842	1	Insertion
Chr1	688135	1	Deletion
Chr1	688232	5	Insertion
Chr1	688439	2	Insertion
Chr1	688481	5	Insertion
Chr1	701549	3	Insertion
Chr1	701619	1	Deletion
Chr1	701760	1	Deletion
Chr1	702274	13	Deletion
Chr1	702330	1	Insertion
Chr1	702762	7	Deletion
Chr1	702779	1	Deletion
Chr1	703047	17	Insertion
Chr1	703052	1	Insertion
Chr1	703256	5	Insertion
Chr1	703578	1	Deletion
Chr1	703585	1	Insertion
Chr1	703602	1	Insertion
Chr1	703605	1	Deletion
Chr1	703837	2	Deletion
Chr1	703914	12	Deletion
Chr1	704326	1	Insertion
Chr1	704376	1	Deletion
Chr1	704379	5	Deletion
Chr1	704494	2	Deletion
Chr1	704559	1	Insertion
Chr1	704678	1	Deletion
Chr1	705429	3	Deletion
Chr1	706001	1	Deletion
Chr1	713562	1	Deletion
Chr1	713574	5	Deletion
Chr1	714887	9	Deletion
Chr1	714897	8	Deletion
Chr1	714943	36	Deletion
Chr1	715764	3	Deletion
Chr1	715961	1	Insertion
Chr1	715991	1	Insertion
Chr1	716074	1	Deletion
Chr1	716158	21	Insertion
Chr1	716220	1	Insertion
Chr1	716298	2	Insertion
Chr1	716315	2	Insertion
Chr1	716327	1	Insertion
Chr1	716331	6	Insertion
Chr1	716340	1	Insertion
Chr1	716443	5	Deletion
Chr1	716449	4	Deletion
Chr1	716472	1	Deletion
Chr1	716653	1	Insertion
Chr1	716739	12	Insertion
Chr1	716785	8	Insertion
Chr1	716815	6	Deletion
Chr1	717018	2	Insertion
Chr1	717105	2	Deletion
Chr1	717273	1	Insertion
Chr1	717444	1	Insertion
Chr1	718054	1	Insertion
Chr1	718141	9	Insertion
Chr1	718258	12	Deletion
Chr1	745526	1	Insertion
Chr1	747581	1	Insertion
Chr1	748151	1	Deletion
Chr1	748699	1	Deletion
Chr1	748701	1	Deletion
Chr1	748705	15	Deletion
Chr1	748886	4	Insertion
Chr1	749310	2	Insertion
Chr1	749402	1	Insertion
Chr1	749405	1	Insertion
Chr1	749414	1	Insertion
Chr1	749415	1	Insertion
Chr1	749419	2	Insertion
Chr1	749491	2	Deletion
Chr1	749495	3	Deletion
Chr1	749576	8	Insertion
Chr1	749581	1	Insertion
Chr1	749712	1	Insertion
Chr1	750074	5	Deletion
Chr1	750162	1	Deletion
Chr1	750319	23	Insertion
Chr1	752532	1	Insertion
Chr1	752818	1	Insertion
Chr1	752824	1	Insertion
Chr1	753935	1	Deletion
Chr1	753975	8	Deletion
Chr1	756441	2	Deletion
Chr1	756483	7	Deletion
Chr1	756758	1	Insertion
Chr1	756766	3	Insertion
Chr1	756767	5	Insertion
Chr1	758090	18	Insertion
Chr1	758092	31	Insertion
Chr1	758093	1	Insertion
Chr1	758095	3	Insertion
Chr1	758097	11	Insertion
Chr1	758183	1	Deletion
Chr1	758835	6	Deletion
Chr1	758842	3	Deletion
Chr1	758908	3	Deletion
Chr1	758990	1	Deletion
Chr1	759066	18	Insertion
Chr1	759268	3	Deletion
Chr1	761466	8	Deletion
Chr1	761790	1	Deletion
Chr1	763048	1	Insertion
Chr1	764254	1	Deletion
Chr1	764481	3	Insertion
Chr1	764796	3	Deletion
Chr1	767561	2	Insertion
Chr1	767562	1	Insertion
Chr1	767563	4	Insertion
Chr1	767597	2	Insertion
Chr1	767600	14	Insertion
Chr1	767603	7	Insertion
Chr1	767971	3	Deletion
Chr1	768077	7	Insertion
Chr1	768081	13	Insertion
Chr1	768083	1	Insertion
Chr1	768161	22	Insertion
Chr1	768176	1	Insertion
Chr1	768344	6	Insertion
Chr1	768346	1	Insertion
Chr1	768347	1	Insertion
Chr1	768349	1	Insertion
Chr1	768476	1	Deletion
Chr1	768499	37	Insertion
Chr1	768501	4	Insertion
Chr1	768511	11	Insertion
Chr1	768513	4	Insertion
Chr1	768515	4	Insertion
Chr1	768517	1	Insertion
Chr1	768549	3	Insertion
Chr1	768558	1	Deletion
Chr1	768563	1	Insertion
Chr1	768667	6	Insertion
Chr1	768668	1	Insertion
Chr1	768670	2	Insertion
Chr1	768671	4	Insertion
Chr1	768723	3	Insertion
Chr1	768966	25	Insertion
Chr1	768967	1	Insertion
Chr1	772625	2	Deletion
Chr1	775912	8	Deletion
Chr1	777103	5	Insertion
Chr1	777548	10	Deletion
Chr1	794598	1	Deletion
Chr1	795536	1	Deletion
Chr1	796293	1	Insertion
Chr1	796366	1	Insertion
Chr1	797428	11	Deletion
Chr1	797603	1	Deletion
Chr1	799366	9	Insertion
Chr1	800614	2	Insertion
Chr1	800909	1	Insertion
Chr1	801621	3	Insertion
Chr1	802237	1	Insertion
Chr1	804771	1	Insertion
Chr1	805160	2	Deletion
Chr1	805248	19	Insertion
Chr1	809184	1	Insertion
Chr1	811671	4	Insertion
Chr1	811755	4	Insertion
Chr1	811924	1	Deletion
Chr1	813495	1	Deletion
Chr1	816398	1	Insertion
Chr1	816765	1	Deletion
Chr1	817136	3	Deletion
Chr1	821320	1	Insertion
Chr1	823695	13	Deletion
Chr1	823709	1	Deletion
Chr1	823712	15	Deletion
Chr1	823731	30	Deletion
Chr1	826187	1	Insertion
Chr1	828723	10	Insertion
Chr1	831929	14	Deletion
Chr1	832829	2	Insertion
Chr1	833671	1	Insertion
Chr1	835248	1	Insertion
Chr1	836740	7	Deletion
Chr1	839149	5	Deletion
Chr1	840841	1	Deletion
Chr1	842110	2	Deletion
Chr1	842493	2	Insertion
Chr1	844469	1	Insertion
Chr1	845251	1	Insertion
Chr1	845254	1	Insertion
Chr1	845362	1	Deletion
Chr1	845884	1	Deletion
Chr1	864851	2	Deletion
Chr1	865086	2	Insertion
Chr1	866040	29	Deletion
Chr1	866312	1	Deletion
Chr1	870803	4	Deletion
Chr1	871473	5	Deletion
Chr1	871642	8	Insertion
Chr1	873611	2	Insertion
Chr1	873629	3	Insertion
Chr1	873678	1	Insertion
Chr1	873737	1	Deletion
Chr1	873801	8	Insertion
Chr1	873835	1	Deletion
Chr1	873839	6	Deletion
Chr1	873934	2	Deletion
Chr1	874316	2	Deletion
Chr1	874355	2	Insertion
Chr1	874356	1	Insertion
Chr1	875134	1	Insertion
Chr1	875305	1	Insertion
Chr1	875322	1	Deletion
Chr1	875338	2	Deletion
Chr1	875539	1	Deletion
Chr1	875987	1	Insertion
Chr1	876122	2	Deletion
Chr1	876194	1	Insertion
Chr1	876419	39	Deletion
Chr1	876516	1	Insertion
Chr1	876782	1	Deletion
Chr1	878243	1	Deletion
Chr1	878524	44	Deletion
Chr1	881621	1	Insertion
Chr1	881645	4	Insertion
Chr1	881646	2	Insertion
Chr1	881863	3	Insertion
Chr1	881931	1	Deletion
Chr1	881953	14	Deletion
Chr1	881968	2	Deletion
Chr1	882068	5	Insertion
Chr1	882070	1	Insertion
Chr1	882704	4	Insertion
Chr1	882775	9	Deletion
Chr1	884117	4	Insertion
Chr1	884212	2	Insertion
Chr1	884213	1	Insertion
Chr1	884359	6	Insertion
Chr1	884387	1	Insertion
Chr1	884546	5	Insertion
Chr1	884612	35	Deletion
Chr1	884955	3	Deletion
Chr1	885280	3	Insertion
Chr1	885309	2	Deletion
Chr1	886707	1	Deletion
Chr1	886715	1	Insertion
Chr1	886734	3	Insertion
Chr1	886767	3	Insertion
Chr1	886777	1	Insertion
Chr1	886782	1	Insertion
Chr1	887862	1	Deletion
Chr1	887923	2	Insertion
Chr1	887925	2	Insertion
Chr1	888043	1	Insertion
Chr1	888197	1	Insertion
Chr1	888212	3	Insertion
Chr1	888241	6	Insertion
Chr1	888242	1	Insertion
Chr1	888409	1	Insertion
Chr1	888501	1	Deletion
Chr1	890408	1	Insertion
Chr1	890441	1	Deletion
Chr1	890497	3	Insertion
Chr1	890499	1	Insertion
Chr1	890586	1	Deletion
Chr1	890590	1	Insertion
Chr1	890825	3	Deletion
Chr1	891458	2	Deletion
Chr1	891462	3	Deletion
Chr1	891467	6	Deletion
Chr1	891475	9	Deletion
Chr1	891489	1	Deletion
Chr1	891492	13	Deletion
Chr1	891506	1	Deletion
Chr1	891886	1	Insertion
Chr1	892037	2	Deletion
Chr1	892041	1	Deletion
Chr1	892190	1	Deletion
Chr1	895263	9	Deletion
Chr1	895564	8	Insertion
Chr1	895565	7	Insertion
Chr1	895567	17	Insertion
Chr1	895568	1	Insertion
Chr1	896085	1	Deletion
Chr1	896483	1	Deletion
Chr1	898174	1	Deletion
Chr1	900651	1	Deletion
Chr1	900828	1	Deletion
Chr1	901588	10	Insertion
Chr1	901627	1	Deletion
Chr1	901639	1	Deletion
Chr1	902759	1	Deletion
Chr1	902975	1	Deletion
Chr1	905034	1	Deletion
Chr1	905595	3	Deletion
Chr1	905601	1	Deletion
Chr1	905607	7	Deletion
Chr1	905615	2	Deletion
Chr1	905656	2	Deletion
Chr1	905784	3	Deletion
Chr1	905866	3	Insertion
Chr1	952481	2	Insertion
Chr1	952487	1	Insertion
Chr1	952497	1	Deletion
Chr1	952512	5	Insertion
Chr1	952544	1	Insertion
Chr1	953681	3	Insertion
Chr1	953698	8	Deletion
Chr1	953726	1	Insertion
Chr1	953775	1	Insertion
Chr1	953808	2	Deletion
Chr1	953934	18	Insertion
Chr1	954847	23	Insertion
Chr1	954849	5	Insertion
Chr1	955265	3	Insertion
Chr1	955293	3	Insertion
Chr1	959471	1	Insertion
Chr1	960480	9	Deletion
Chr1	960641	4	Deletion
Chr1	960819	1	Deletion
Chr1	961434	2	Insertion
Chr1	961438	1	Insertion
Chr1	961511	1	Insertion
Chr1	961627	1	Insertion
Chr1	961647	8	Deletion
Chr1	961656	4	Deletion
Chr1	961725	2	Insertion
Chr1	962170	16	Deletion
Chr1	962464	1	Deletion
Chr1	962488	42	Deletion
Chr1	962534	4	Deletion
Chr1	962573	10	Insertion
Chr1	962648	15	Deletion
Chr1	962664	4	Deletion
Chr1	962733	17	Deletion
Chr1	962785	4	Deletion
Chr1	963804	4	Deletion
Chr1	963842	4	Insertion
Chr1	963942	2	Insertion
Chr1	964056	5	Deletion
Chr1	964268	1	Insertion
Chr1	965263	1	Deletion
Chr1	965971	2	Deletion
Chr1	968274	3	Insertion
Chr1	968336	9	Deletion
Chr1	968435	1	Deletion
Chr1	969384	4	Insertion
Chr1	969385	3	Insertion
Chr1	969387	1	Insertion
Chr1	969389	2	Insertion
Chr1	970931	58	Deletion
Chr1	971189	2	Deletion
Chr1	972454	3	Insertion
Chr1	972573	2	Deletion
Chr1	972701	1	Insertion
Chr1	972778	3	Insertion
Chr1	973143	3	Insertion
Chr1	988242	1	Deletion
Chr1	988286	1	Insertion
Chr1	989133	1	Deletion
Chr1	989146	3	Deletion
Chr1	989466	1	Insertion
Chr1	991296	3	Insertion
Chr1	991514	10	Deletion
Chr1	991564	1	Deletion
Chr1	991762	8	Deletion
Chr1	991805	14	Deletion
Chr1	991945	3	Insertion
Chr1	993540	4	Insertion
Chr1	994765	1	Deletion
Chr1	994845	16	Insertion
Chr1	994856	7	Insertion
Chr1	994857	1	Insertion
Chr1	994901	2	Deletion
Chr1	994984	5	Deletion
Chr1	995564	8	Insertion
Chr1	995704	3	Deletion
Chr1	995748	6	Deletion
Chr1	996074	6	Deletion
Chr1	996098	3	Insertion
Chr1	996608	1	Deletion
Chr1	996768	1	Insertion
Chr1	996769	1	Insertion
Chr1	996772	1	Insertion
Chr1	996773	1	Insertion
Chr1	996870	4	Deletion
Chr1	997952	1	Deletion
Chr1	997982	1	Deletion
Chr1	997986	1	Insertion
Chr1	997990	1	Insertion
Chr1	998000	1	Insertion
Chr1	998061	1	Insertion
Chr1	998880	2	Deletion
Chr1	999152	1	Deletion
Chr1	999156	3	Deletion
Chr1	999160	5	Deletion
Chr1	999199	2	Deletion
Chr1	999280	7	Insertion
Chr1	999281	4	Insertion
Chr1	999299	1	Deletion
Chr1	999339	1	Deletion
Chr1	1034975	2	Insertion
Chr1	1035855	1	Deletion
Chr1	1035884	1	Insertion
Chr1	1036262	3	Deletion
Chr1	1036375	2	Insertion
Chr1	1036377	1	Insertion
Chr1	1037449	1	Insertion
Chr1	1037474	1	Deletion
Chr1	1037483	1	Deletion
Chr1	1037563	4	Deletion
Chr1	1038540	3	Insertion
Chr1	1040205	1	Insertion
Chr1	1040293	1	Deletion
Chr1	1040376	9	Deletion
Chr1	1040386	1	Deletion
Chr1	1040390	5	Deletion
Chr1	1040402	6	Deletion
Chr1	1040409	6	Deletion
Chr1	1040701	10	Insertion
Chr1	1040841	1	Deletion
Chr1	1041076	4	Insertion
Chr1	1041083	8	Insertion
Chr1	1041086	2	Insertion
Chr1	1041133	3	Insertion
Chr1	1041167	1	Insertion
Chr1	1041171	4	Insertion
Chr1	1041195	10	Deletion
Chr1	1041286	1	Deletion
Chr1	1041396	4	Insertion
Chr1	1041432	3	Insertion
Chr1	1041811	4	Insertion
Chr1	1042153	1	Insertion
Chr1	1043139	1	Deletion
Chr1	1043180	1	Deletion
Chr1	1043312	1	Deletion
Chr1	1045362	2	Insertion
Chr1	1045364	3	Insertion
Chr1	1045366	3	Insertion
Chr1	1045401	3	Insertion
Chr1	1045405	8	Insertion
Chr1	1045406	1	Insertion
Chr1	1045643	2	Deletion
Chr1	1045653	1	Deletion
Chr1	1046018	3	Deletion
Chr1	1046034	1	Insertion
Chr1	1046035	2	Insertion
Chr1	1046043	3	Insertion
Chr1	1046147	4	Insertion
Chr1	1046198	2	Insertion
Chr1	1046219	1	Insertion
Chr1	1046441	1	Insertion
Chr1	1046457	2	Insertion
Chr1	1047670	3	Deletion
Chr1	1047684	4	Deletion
Chr1	1047710	1	Deletion
Chr1	1048300	1	Deletion
Chr1	1048323	4	Deletion
Chr1	1048345	57	Deletion
Chr1	1048458	1	Insertion
Chr1	1048505	3	Deletion
Chr1	1048574	3	Insertion
Chr1	1048593	1	Deletion
Chr1	1049066	18	Insertion
Chr1	1050473	4	Insertion
Chr1	1050664	1	Deletion
Chr1	1053603	1	Deletion
Chr1	1053959	2	Deletion
Chr1	1057883	1	Insertion
Chr1	1065566	2	Deletion
Chr1	1065599	1	Deletion
Chr1	1065867	38	Insertion
Chr1	1066002	5	Insertion
Chr1	1066006	4	Insertion
Chr1	1066011	2	Insertion
Chr1	1066255	1	Insertion
Chr1	1066491	7	Insertion
Chr1	1066494	1	Insertion
Chr1	1066951	4	Deletion
Chr1	1067383	2	Insertion
Chr1	1067405	2	Insertion
Chr1	1067407	1	Insertion
Chr1	1067414	1	Insertion
Chr1	1067615	1	Insertion
Chr1	1067742	1	Insertion
Chr1	1067757	1	Deletion
Chr1	1068013	1	Deletion
Chr1	1068179	1	Insertion
Chr1	1068191	7	Insertion
Chr1	1068192	3	Insertion
Chr1	1068235	3	Insertion
Chr1	1068802	4	Insertion
Chr1	1068817	1	Insertion
Chr1	1068950	2	Deletion
Chr1	1069229	1	Deletion
Chr1	1069716	1	Deletion
Chr1	1070344	2	Deletion
Chr1	1070980	1	Deletion
Chr1	1071503	1	Insertion
Chr1	1071997	1	Deletion
Chr1	1072819	2	Insertion
Chr1	1073267	1	Insertion
Chr1	1073278	1	Insertion
Chr1	1074690	1	Deletion
Chr1	1074708	8	Insertion
Chr1	1075370	1	Deletion
Chr1	1076165	5	Deletion
Chr1	1076235	9	Insertion
Chr1	1076849	6	Insertion
Chr1	1079443	2	Deletion
Chr1	1079753	6	Insertion
Chr1	1079754	2	Insertion
Chr1	1079872	5	Insertion
Chr1	1079921	13	Insertion
Chr1	1079971	4	Insertion
Chr1	1080165	2	Insertion
Chr1	1080166	1	Insertion
Chr1	1080182	6	Deletion
Chr1	1080278	3	Deletion
Chr1	1080304	3	Deletion
Chr1	1080309	1	Deletion
Chr1	1080315	11	Deletion
Chr1	1080477	1	Deletion
Chr1	1080573	1	Deletion
Chr1	1080577	2	Deletion
Chr1	1080590	3	Insertion
Chr1	1080610	2	Deletion
Chr1	1080656	4	Deletion
Chr1	1080672	1	Insertion
Chr1	1080769	2	Deletion
Chr1	1080901	1	Deletion
Chr1	1080904	2	Deletion
Chr1	1081162	3	Deletion
Chr1	1081169	1	Deletion
Chr1	1081288	1	Deletion
Chr1	1081362	1	Deletion
Chr1	1081373	1	Deletion
Chr1	1081398	1	Deletion
Chr1	1081452	1	Insertion
Chr1	1081735	3	Insertion
Chr1	1082034	5	Deletion
Chr1	1082202	1	Deletion
Chr1	1082497	1	Deletion
Chr1	1082551	10	Deletion
Chr1	1082629	1	Deletion
Chr1	1083071	5	Deletion
Chr1	1083248	8	Insertion
Chr1	1083249	3	Insertion
Chr1	1083251	1	Insertion
Chr1	1083465	23	Insertion
Chr1	1083682	1	Insertion
Chr1	1089089	10	Insertion
Chr1	1090749	3	Insertion
Chr1	1093904	3	Deletion
Chr1	1094105	6	Insertion
Chr1	1094244	2	Insertion
Chr1	1094317	3	Deletion
Chr1	1094419	1	Deletion
Chr1	1094498	1	Insertion
Chr1	1095117	1	Deletion
Chr1	1095414	3	Deletion
Chr1	1095460	1	Deletion
Chr1	1095474	9	Deletion
Chr1	1095484	3	Deletion
Chr1	1095824	4	Deletion
Chr1	1095833	2	Deletion
Chr1	1095921	4	Deletion
Chr1	1097128	2	Insertion
Chr1	1097262	1	Deletion
Chr1	1097427	4	Insertion
Chr1	1097805	1	Insertion
Chr1	1098263	2	Deletion
Chr1	1098872	1	Insertion
Chr1	1099416	1	Insertion
Chr1	1099442	1	Deletion
Chr1	1099810	1	Deletion
Chr1	1099859	3	Insertion
Chr1	1100417	1	Insertion
Chr1	1100435	3	Deletion
Chr1	1100893	4	Deletion
Chr1	1101322	1	Deletion
Chr1	1103496	4	Insertion
Chr1	1105381	3	Deletion
Chr1	1106039	11	Deletion
Chr1	1106687	1	Deletion
Chr1	1108543	1	Deletion
Chr1	1109492	1	Deletion
Chr1	1109503	1	Insertion
Chr1	1109891	3	Deletion
Chr1	1110415	3	Insertion
Chr1	1110453	1	Deletion
Chr1	1110489	7	Deletion
Chr1	1111603	1	Deletion
Chr1	1112233	1	Insertion
Chr1	1112823	1	Deletion
Chr1	1114290	1	Insertion
Chr1	1116162	1	Insertion
Chr1	1116184	2	Deletion
Chr1	1116403	1	Deletion
Chr1	1117213	2	Deletion
Chr1	1118322	1	Insertion
Chr1	1118467	1	Deletion
Chr1	1119839	1	Deletion
Chr1	1119968	4	Deletion
Chr1	1119973	1	Deletion
Chr1	1120303	1	Deletion
Chr1	1120392	10	Deletion
Chr1	1123229	2	Insertion
Chr1	1123231	1	Insertion
Chr1	1123232	3	Insertion
Chr1	1123422	1	Insertion
Chr1	1123474	1	Insertion
Chr1	1124217	1	Deletion
Chr1	1124334	1	Insertion
Chr1	1125985	5	Deletion
Chr1	1125993	6	Deletion
Chr1	1126057	5	Insertion
Chr1	1126076	3	Insertion
Chr1	1126174	1	Deletion
Chr1	1126177	16	Deletion
Chr1	1126325	11	Deletion
Chr1	1126728	4	Deletion
Chr1	1127181	1	Insertion
Chr1	1127191	4	Insertion
Chr1	1127193	1	Insertion
Chr1	1127382	3	Insertion
Chr1	1127405	3	Deletion
Chr1	1127429	1	Deletion
Chr1	1127584	6	Insertion
Chr1	1127645	2	Insertion
Chr1	1127696	4	Insertion
Chr1	1127698	8	Insertion
Chr1	1127760	1	Deletion
Chr1	1127764	1	Deletion
Chr1	1127804	3	Deletion
Chr1	1127810	14	Deletion
Chr1	1127826	3	Deletion
Chr1	1127866	2	Deletion
Chr1	1127871	1	Deletion
Chr1	1127943	1	Insertion
Chr1	1127953	4	Deletion
Chr1	1127958	1	Deletion
Chr1	1128542	3	Deletion
Chr1	1128547	8	Deletion
Chr1	1128587	3	Deletion
Chr1	1128717	1	Insertion
Chr1	1128763	17	Insertion
Chr1	1128856	1	Insertion
Chr1	1129025	3	Deletion
Chr1	1129051	2	Insertion
Chr1	1129078	2	Insertion
Chr1	1129140	1	Insertion
Chr1	1129146	1	Insertion
Chr1	1129208	2	Deletion
Chr1	1129214	1	Deletion
Chr1	1129229	7	Deletion
Chr1	1129241	2	Deletion
Chr1	1129297	1	Insertion
Chr1	1129303	1	Deletion
Chr1	1129509	25	Deletion
Chr1	1129537	2	Deletion
Chr1	1129798	2	Deletion
Chr1	1129811	1	Insertion
Chr1	1129813	1	Insertion
Chr1	1129818	1	Deletion
Chr1	1129831	1	Deletion
Chr1	1129898	8	Insertion
Chr1	1129899	1	Insertion
Chr1	1129961	5	Deletion
Chr1	1129967	3	Deletion
Chr1	1129978	11	Deletion
Chr1	1130324	2	Insertion
Chr1	1130383	1	Insertion
Chr1	1133509	28	Deletion
Chr1	1133629	1	Deletion
Chr1	1133631	13	Deletion
Chr1	1133648	11	Deletion
Chr1	1133660	9	Deletion
Chr1	1133672	1	Deletion
Chr1	1133674	1	Deletion
Chr1	1133676	1	Deletion
Chr1	1133678	1	Deletion
Chr1	1133681	1	Deletion
Chr1	1133685	1	Deletion
Chr1	1133744	1	Deletion
Chr1	1134113	6	Deletion
Chr1	1135373	36	Deletion
Chr1	1137873	1	Deletion
Chr1	1139975	1	Insertion
Chr1	1140980	1	Insertion
Chr1	1150192	1	Insertion
Chr1	1150300	5	Deletion
Chr1	1150306	1	Deletion
Chr1	1150409	1	Deletion
Chr1	1150487	2	Insertion
Chr1	1151043	4	Deletion
Chr1	1151048	2	Deletion
Chr1	1151177	2	Insertion
Chr1	1151495	1	Insertion
Chr1	1151539	10	Deletion
Chr1	1151552	3	Deletion
Chr1	1151557	6	Deletion
Chr1	1151864	1	Insertion
Chr1	1152079	3	Insertion
Chr1	1152088	1	Deletion
Chr1	1152148	1	Insertion
Chr1	1152890	4	Insertion
Chr1	1152893	1	Insertion
Chr1	1154143	18	Insertion
Chr1	1154526	1	Insertion
Chr1	1154971	2	Insertion
Chr1	1155018	3	Insertion
Chr1	1155523	17	Insertion
Chr1	1155765	2	Insertion
Chr1	1155964	1	Deletion
Chr1	1156189	2	Insertion
Chr1	1156931	2	Insertion
Chr1	1157343	18	Insertion
Chr1	1157548	1	Insertion
Chr1	1158352	1	Deletion
Chr1	1158983	1	Deletion
Chr1	1159073	1	Insertion
Chr1	1159955	2	Deletion
Chr1	1159992	1	Deletion
Chr1	1160124	13	Deletion
Chr1	1160138	1	Deletion
Chr1	1161435	33	Deletion
Chr1	1161643	8	Deletion
Chr1	1161654	29	Deletion
Chr1	1161687	9	Deletion
Chr1	1161703	32	Deletion
Chr1	1162342	1	Insertion
Chr1	1162429	1	Insertion
Chr1	1162438	8	Insertion
Chr1	1163233	1	Deletion
Chr1	1163273	1	Insertion
Chr1	1163693	1	Deletion
Chr1	1163800	1	Insertion
Chr1	1163835	14	Deletion
Chr1	1163850	2	Deletion
Chr1	1163853	3	Deletion
Chr1	1164197	9	Deletion
Chr1	1164564	1	Insertion
Chr1	1164630	1	Deletion
Chr1	1164891	1	Deletion
Chr1	1165022	1	Insertion
Chr1	1165087	10	Deletion
Chr1	1165098	12	Deletion
Chr1	1166183	3	Insertion
Chr1	1166242	2	Insertion
Chr1	1167216	1	Insertion
Chr1	1167360	4	Deletion
Chr1	1167373	4	Insertion
Chr1	1167439	9	Insertion
Chr1	1167441	3	Insertion
Chr1	1167546	1	Insertion
Chr1	1168472	1	Deletion
Chr1	1168531	1	Deletion
Chr1	1169085	4	Insertion
Chr1	1169089	1	Insertion
Chr1	1169143	16	Insertion
Chr1	1169251	1	Insertion
Chr1	1169628	1	Insertion
Chr1	1170350	2	Insertion
Chr1	1170701	1	Deletion
Chr1	1171291	26	Insertion
Chr1	1172611	14	Deletion
Chr1	1174559	1	Deletion
Chr1	1175026	8	Insertion
Chr1	1175037	10	Deletion
Chr1	1175673	3	Deletion
Chr1	1175762	2	Insertion
Chr1	1175798	1	Deletion
Chr1	1177675	12	Deletion
Chr1	1177942	4	Insertion
Chr1	1198716	1	Insertion
Chr1	1205419	1	Insertion
[truncated: 440,964+ more rows]

## Sheet: PAVs
Additional file 5 Comparative genomic analysis between KitaakeX and Zhenshan97
Chromosome	Start position	End position	Size (bp)
Chr1	32940	33052	112
Chr1	68402	71660	3258
Chr1	95809	96043	234
Chr1	113974	117538	3564
Chr1	118009	142447	24438
Chr1	194493	194909	416
Chr1	198307	199896	1589
Chr1	205011	205665	654
Chr1	252660	253083	423
Chr1	284199	284817	618
Chr1	286272	286483	211
Chr1	287108	287348	240
Chr1	290055	296807	6752
Chr1	298561	302405	3844
Chr1	315818	316086	268
Chr1	327712	328755	1043
Chr1	404570	404676	106
Chr1	411565	412082	517
Chr1	412839	413844	1005
Chr1	415473	415716	243
Chr1	416339	416682	343
Chr1	418346	419826	1480
Chr1	420403	420987	584
Chr1	422698	422908	210
Chr1	425514	426019	505
Chr1	426721	426921	200
Chr1	446879	448321	1442
Chr1	449545	449810	265
Chr1	450971	451552	581
Chr1	462893	463171	278
Chr1	465555	465747	192
Chr1	466622	467778	1156
Chr1	468399	469388	989
Chr1	535515	536959	1444
Chr1	609436	609782	346
Chr1	643969	644205	236
Chr1	659020	659221	201
Chr1	687215	687378	163
Chr1	688506	701528	13022
Chr1	701853	701968	115
Chr1	706728	713498	6770
Chr1	723170	741320	18150
Chr1	745703	747162	1459
Chr1	780154	794370	14216
Chr1	822943	823354	411
Chr1	832841	833445	604
Chr1	846608	862681	16073
Chr1	878727	881616	2889
Chr1	885383	886444	1061
Chr1	886874	887857	983
Chr1	896163	896306	143
Chr1	901983	902541	558
Chr1	962958	963740	782
Chr1	969132	969293	161
Chr1	971295	971628	333
Chr1	973754	987848	14094
Chr1	988758	989007	249
Chr1	992254	992695	441
Chr1	995351	995475	124
Chr1	996923	997909	986
Chr1	999377	1033867	34490
Chr1	1046468	1047604	1136
Chr1	1074037	1074278	241
Chr1	1077755	1078367	612
Chr1	1095541	1095782	241
Chr1	1096161	1097108	947
Chr1	1109911	1110158	247
Chr1	1127998	1128472	474
Chr1	1128918	1129005	87
Chr1	1141079	1150137	9058
Chr1	1165288	1165817	529
Chr1	1166677	1166960	283
Chr1	1175163	1175325	162
Chr1	1399824	1416991	17167
Chr1	1417686	1418372	686
Chr1	1421226	1426237	5011
Chr1	1428503	1429956	1453
Chr1	1430146	1430875	729
Chr1	1431201	1431529	328
Chr1	1433015	1433773	758
Chr1	1434033	1434463	430
Chr1	1434907	1435544	637
Chr1	1435939	1436227	288
Chr1	1483105	1492373	9268
Chr1	1557021	1557404	383
Chr1	1569002	1569497	495
Chr1	1571460	1572015	555
Chr1	1573997	1574940	943
Chr1	1576182	1576376	194
Chr1	1580950	1588154	7204
Chr1	1753442	1753596	154
Chr1	1764365	1765383	1018
Chr1	1804288	1804720	432
Chr1	1849906	1850269	363
Chr1	1878131	1880805	2674
Chr1	1915255	1916430	1175
Chr1	1922246	1922420	174
Chr1	1928288	1928530	242
Chr1	1972531	1980998	8467
Chr1	2007404	2007629	225
Chr1	2016985	2017241	256
Chr1	2019241	2020029	788
Chr1	2024889	2026435	1546
Chr1	2028686	2029305	619
Chr1	2034602	2035460	858
Chr1	2042091	2042342	251
Chr1	2042841	2044087	1246
Chr1	2045167	2048672	3505
Chr1	2049976	2051133	1157
Chr1	2053600	2053753	153
Chr1	2054110	2054440	330
Chr1	2055314	2055787	473
Chr1	2059828	2061199	1371
Chr1	2061506	2063045	1539
Chr1	2063405	2070112	6707
Chr1	2073917	2077760	3843
Chr1	2079054	2079300	246
Chr1	2080483	2092231	11748
Chr1	2096849	2097655	806
Chr1	2110388	2110542	154
Chr1	2126222	2130108	3886
Chr1	2233846	2234190	344
Chr1	2271544	2277721	6177
Chr1	2278709	2279834	1125
Chr1	2282085	2282202	117
Chr1	2282500	2283206	706
Chr1	2283940	2284966	1026
Chr1	2285876	2286050	174
Chr1	2298410	2298587	177
Chr1	2330718	2343164	12446
Chr1	2364969	2370382	5413
Chr1	2381477	2383060	1583
Chr1	2383569	2383817	248
Chr1	2384185	2384497	312
Chr1	2384732	2385016	284
Chr1	2408022	2412093	4071
Chr1	2432102	2441461	9359
Chr1	2452545	2455025	2480
Chr1	2457318	2457640	322
Chr1	2460535	2460738	203
Chr1	2461362	2492017	30655
Chr1	2492431	2492680	249
Chr1	2493011	2494563	1552
Chr1	2494883	2495169	286
Chr1	2495622	2514357	18735
Chr1	2514816	2515423	607
Chr1	2516422	2555228	38806
Chr1	2556104	2561095	4991
Chr1	2564909	2566132	1223
Chr1	2571504	2571926	422
Chr1	2577458	2577689	231
Chr1	2578306	2578590	284
Chr1	2583183	2583430	247
Chr1	2601258	2601390	132
Chr1	2605534	2606017	483
Chr1	2634051	2641442	7391
Chr1	2641897	2642655	758
Chr1	2648073	2649573	1500
Chr1	2653944	2654033	89
Chr1	2664587	2664798	211
Chr1	2667846	2695071	27225
Chr1	2719166	2719295	129
Chr1	2770001	2772072	2071
Chr1	2778765	2778977	212
Chr1	2795239	2795385	146
Chr1	2800811	2802258	1447
Chr1	2802989	2803327	338
Chr1	2803802	2805291	1489
Chr1	2809585	2809734	149
Chr1	2810504	2810962	458
Chr1	2813764	2815228	1464
Chr1	2830542	2832350	1808
Chr1	2834358	2835013	655
Chr1	2835676	2838833	3157
Chr1	2839611	2840386	775
Chr1	2844266	2844736	470
Chr1	2846302	2848013	1711
Chr1	2849775	2849997	222
Chr1	2853900	2854654	754
Chr1	2873584	2874628	1044
Chr1	2898111	2898413	302
Chr1	2899246	2899481	235
Chr1	2907632	2911244	3612
Chr1	2911782	2911929	147
Chr1	2912154	2912673	519
Chr1	2913311	2913725	414
Chr1	2918121	2930196	12075
Chr1	2930672	2932114	1442
Chr1	2933019	2934650	1631
Chr1	2942443	2942753	310
Chr1	2947614	2947945	331
Chr1	2995091	2996609	1518
Chr1	2997172	2997800	628
Chr1	3023991	3026976	2985
Chr1	3029047	3041053	12006
Chr1	3051492	3051623	131
Chr1	3071156	3071349	193
Chr1	3099421	3100486	1065
Chr1	3103450	3103592	142
Chr1	3132929	3133554	625
Chr1	3135130	3136259	1129
Chr1	3136849	3168827	31978
Chr1	3178692	3190288	11596
Chr1	3191778	3192378	600
Chr1	3214269	3221318	7049
Chr1	3222385	3222955	570
Chr1	3225824	3227286	1462
Chr1	3240889	3257012	16123
Chr1	3258874	3259143	269
Chr1	3263357	3263626	269
Chr1	3263973	3274183	10210
Chr1	3276659	3300143	23484
Chr1	3303987	3308782	4795
Chr1	3309632	3311969	2337
Chr1	3312450	3316765	4315
Chr1	3316989	3317438	449
Chr1	3319860	3320010	150
Chr1	3324550	3325499	949
Chr1	3325648	3325988	340
Chr1	3328704	3331180	2476
Chr1	3333737	3341531	7794
Chr1	3345979	3346226	247
Chr1	3392697	3393210	513
Chr1	3404393	3404958	565
Chr1	3469307	3469645	338
Chr1	3487322	3487488	166
Chr1	3492560	3492780	220
Chr1	3505420	3506047	627
Chr1	3705947	3706556	609
Chr1	3714906	3718481	3575
Chr1	3729370	3729722	352
Chr1	3740544	3741323	779
Chr1	3837561	3848564	11003
Chr1	3863816	3865872	2056
Chr1	3880827	3883916	3089
Chr1	3887639	3888829	1190
Chr1	3889266	3890293	1027
Chr1	3891023	3893336	2313
Chr1	3902689	3903252	563
Chr1	3917817	3918221	404
Chr1	3919328	3919663	335
Chr1	3923074	3923319	245
Chr1	3926726	3927117	391
Chr1	3931021	3931252	231
Chr1	3931699	3932475	776
Chr1	3934792	3935080	288
Chr1	3939321	3940565	1244
Chr1	3950622	3960734	10112
Chr1	3963745	3964000	255
Chr1	3966547	3966865	318
Chr1	3973141	3974298	1157
Chr1	3976111	3978963	2852
Chr1	3979423	3982897	3474
Chr1	3983015	3983184	169
Chr1	3989622	3997629	8007
Chr1	3998050	3998380	330
Chr1	4000286	4000521	235
Chr1	4001202	4001937	735
Chr1	4003338	4004060	722
Chr1	4006116	4006856	740
Chr1	4008398	4008557	159
Chr1	4045840	4045958	118
Chr1	4087570	4087834	264
Chr1	4147714	4148227	513
Chr1	4172348	4172518	170
Chr1	4173088	4173198	110
Chr1	4185224	4185847	623
Chr1	4189560	4189674	114
Chr1	4273537	4273884	347
Chr1	4275787	4282125	6338
Chr1	4283021	4283231	210
Chr1	4284836	4285078	242
Chr1	4285854	4291228	5374
Chr1	4292305	4292553	248
Chr1	4374771	4375040	269
Chr1	4392739	4393465	726
Chr1	4428801	4429023	222
Chr1	4439327	4439470	143
Chr1	4446565	4457385	10820
Chr1	4502928	4503126	198
Chr1	4538625	4538870	245
Chr1	4540227	4575681	35454
Chr1	4580914	4581147	233
Chr1	4583007	4583496	489
Chr1	4583992	4584419	427
Chr1	4586539	4586703	164
Chr1	4594571	4597036	2465
Chr1	4639764	4650668	10904
Chr1	4669425	4669643	218
Chr1	4738669	4738939	270
Chr1	4802515	4802603	88
Chr1	4829845	4830413	568
Chr1	4849063	4852920	3857
Chr1	4861776	4862117	341
Chr1	4869127	4869348	221
Chr1	4869726	4870264	538
Chr1	4871525	4872102	577
Chr1	4872591	4874753	2162
Chr1	4876807	4877938	1131
Chr1	4878385	4879402	1017
Chr1	4880064	4880320	256
Chr1	4880900	4881038	138
Chr1	4881160	4881303	143
Chr1	4881574	4881831	257
Chr1	4904691	4911413	6722
Chr1	5142029	5142379	350
Chr1	5149418	5149657	239
Chr1	5177452	5177791	339
Chr1	5178956	5179110	154
Chr1	5179722	5179875	153
Chr1	5188416	5188729	313
Chr1	5218055	5218169	114
Chr1	5231933	5232430	497
Chr1	5233013	5233498	485
Chr1	5234131	5235862	1731
Chr1	5255120	5256343	1223
Chr1	5264978	5265123	145
Chr1	5283752	5283858	106
Chr1	5363408	5363649	241
Chr1	5371703	5372787	1084
Chr1	5373040	5376545	3505
Chr1	5380756	5380890	134
Chr1	5418802	5418902	100
Chr1	5427386	5430934	3548
Chr1	5433107	5433213	106
Chr1	5438189	5442166	3977
Chr1	5449195	5449553	358
Chr1	5457076	5457409	333
Chr1	5458390	5458608	218
Chr1	5461865	5462547	682
Chr1	5477862	5479743	1881
Chr1	5517078	5517176	98
Chr1	5561386	5591482	30096
Chr1	5620023	5620258	235
Chr1	5728142	5728254	112
Chr1	5729999	5730508	509
Chr1	5730879	5731119	240
Chr1	5758656	5759625	969
Chr1	5785689	5785781	92
Chr1	5798285	5799217	932
Chr1	5803199	5803318	119
Chr1	5828414	5833570	5156
Chr1	5841967	5842930	963
Chr1	5846817	5849478	2661
Chr1	5851442	5862808	11366
Chr1	5874357	5874564	207
Chr1	5875755	5876222	467
Chr1	5882257	5884189	1932
Chr1	5889356	5889690	334
Chr1	5906577	5909722	3145
Chr1	5922354	5926229	3875
Chr1	5928743	5929609	866
Chr1	6101028	6101358	330
Chr1	6113473	6113697	224
Chr1	6117353	6117617	264
Chr1	6117915	6118045	130
Chr1	6169466	6174104	4638
Chr1	6184560	6184892	332
Chr1	6265103	6270885	5782
Chr1	6277480	6281304	3824
Chr1	6297096	6297697	601
Chr1	6304457	6304755	298
Chr1	6309614	6315440	5826
Chr1	6323348	6323682	334
Chr1	6334562	6334682	120
Chr1	6365768	6367018	1250
Chr1	6410141	6410298	157
Chr1	6447251	6450348	3097
Chr1	6472134	6472513	379
Chr1	6474879	6479209	4330
Chr1	6483246	6483702	456
Chr1	6489473	6489586	113
Chr1	6497270	6497399	129
Chr1	6569268	6569496	228
Chr1	6582530	6588843	6313
Chr1	6598861	6599133	272
Chr1	6608162	6608297	135
Chr1	6649279	6658433	9154
Chr1	6660510	6665060	4550
Chr1	6778423	6778539	116
Chr1	6793431	6793558	127
Chr1	6802107	6802336	229
Chr1	6837559	6838816	1257
Chr1	6895235	6895397	162
Chr1	6905254	6905808	554
Chr1	6942225	6942461	236
Chr1	6958114	6958452	338
Chr1	6959962	6960080	118
Chr1	6970103	6970663	560
Chr1	6979672	6979781	109
Chr1	6989761	6990102	341
Chr1	7039916	7040082	166
Chr1	7043995	7044162	167
Chr1	7051881	7064694	12813
Chr1	7079459	7080668	1209
Chr1	7087388	7087609	221
Chr1	7103617	7103879	262
Chr1	7123565	7123669	104
Chr1	7140482	7140664	182
Chr1	7203003	7203608	605
Chr1	7204705	7204975	270
Chr1	7205645	7205877	232
Chr1	7223611	7225265	1654
Chr1	7234708	7234847	139
Chr1	7235269	7235495	226
Chr1	7236779	7237634	855
Chr1	7237860	7240548	2688
Chr1	7244810	7244952	142
Chr1	7247471	7247650	179
Chr1	7249640	7250455	815
Chr1	7268374	7268530	156
Chr1	7274429	7274649	220
Chr1	7278450	7278541	91
Chr1	7382825	7383095	270
Chr1	7409973	7410065	92
Chr1	7432120	7432352	232
Chr1	7500144	7503564	3420
Chr1	7506873	7514667	7794
Chr1	7519228	7519844	616
Chr1	7520587	7520839	252
Chr1	7521863	7522127	264
Chr1	7532588	7729829	197241
Chr1	7731378	7731487	109
Chr1	7738194	7738796	602
Chr1	7739978	7740480	502
Chr1	7756996	7757168	172
Chr1	7767053	7767459	406
Chr1	7782508	7784472	1964
Chr1	7797132	7797620	488
Chr1	7821836	7822038	202
Chr1	7828667	7829525	858
Chr1	7853819	7854033	214
Chr1	7887332	7890043	2711
Chr1	7906775	7917978	11203
Chr1	7947370	7948065	695
Chr1	7949860	7964232	14372
Chr1	7993688	7993957	269
Chr1	7996352	7996474	122
Chr1	8022295	8022557	262
Chr1	8233225	8233360	135
Chr1	8234306	8234403	97
Chr1	8235036	8235160	124
Chr1	8269611	8269702	91
Chr1	8285700	8289706	4006
Chr1	8331567	8331659	92
Chr1	8436350	8436780	430
Chr1	8595809	8696950	101141
Chr1	8697365	8699074	1709
Chr1	8788688	8795160	6472
Chr1	8887401	8888233	832
Chr1	8893539	8894301	762
Chr1	8914814	8915427	613
Chr1	8915604	8915776	172
Chr1	8916611	8917048	437
Chr1	8917523	8917702	179
Chr1	8918410	8919169	759
Chr1	8921365	8921501	136
Chr1	8937191	8937641	450
Chr1	8939250	8939682	432
Chr1	8940970	8941079	109
Chr1	8941364	8941722	358
Chr1	8942118	8942545	427
Chr1	8942719	8943444	725
Chr1	8943882	8944104	222
Chr1	8945342	8945800	458
Chr1	8958228	8958642	414
Chr1	8963593	8964044	451
Chr1	9030434	9030704	270
Chr1	9117808	9122209	4401
Chr1	9155055	9156141	1086
Chr1	9329977	9330087	110
Chr1	9333863	9334040	177
Chr1	9349477	9349609	132
Chr1	9356100	9356222	122
Chr1	9360057	9366449	6392
Chr1	9386456	9386597	141
Chr1	9506557	9512058	5501
Chr1	9585266	9585390	124
Chr1	9608304	9611688	3384
Chr1	9647073	9661612	14539
Chr1	9732488	9738965	6477
Chr1	9743532	9743787	255
Chr1	9852448	9852612	164
Chr1	9885720	9885848	128
Chr1	9920135	9920890	755
Chr1	9938838	9939112	274
Chr1	9947440	9947650	210
Chr1	9953181	9953292	111
Chr1	10045579	10046078	499
Chr1	10069155	10069310	155
Chr1	10088121	10088367	246
Chr1	10120544	10120768	224
Chr1	10147838	10160777	12939
Chr1	10166947	10167218	271
Chr1	10189206	10201693	12487
Chr1	10217665	10220001	2336
Chr1	10233943	10234371	428
Chr1	10241601	10248024	6423
Chr1	10253394	10259453	6059
Chr1	10323293	10323486	193
Chr1	10336821	10337123	302
Chr1	10341507	10341729	222
Chr1	10343228	10343412	184
Chr1	10353446	10356610	3164
Chr1	10361084	10361320	236
Chr1	10390744	10391719	975
Chr1	10418600	10429985	11385
Chr1	10452050	10452249	199
Chr1	10551700	10558479	6779
Chr1	10559473	10567512	8039
Chr1	10574816	10597795	22979
Chr1	10601224	10601402	178
Chr1	10634077	10635343	1266
Chr1	10660629	10660736	107
Chr1	10672013	10675812	3799
Chr1	10676292	10676442	150
Chr1	10693653	10693802	149
Chr1	10710601	10711928	1327
Chr1	10727284	10792740	65456
Chr1	10809498	10809636	138
Chr1	10853661	10854211	550
Chr1	10864439	10872247	7808
Chr1	10874656	10874930	274
Chr1	10875754	10876956	1202
Chr1	10877702	10878781	1079
Chr1	10882164	10883375	1211
Chr1	10896193	10915131	18938
Chr1	10943109	10955916	12807
Chr1	10959961	10973326	13365
Chr1	10984977	10985217	240
Chr1	10986693	10987558	865
Chr1	11047380	11052019	4639
Chr1	11059058	11060059	1001
Chr1	11091481	11092739	1258
Chr1	11093166	11094245	1079
Chr1	11102518	11102741	223
Chr1	11112556	11112696	140
Chr1	11113914	11115065	1151
Chr1	11140174	11141499	1325
Chr1	11150820	11151045	225
Chr1	11183642	11184202	560
Chr1	11188300	11188404	104
Chr1	11248431	11248794	363
Chr1	11262569	11262661	92
Chr1	11289368	11298417	9049
Chr1	11341567	11342243	676
Chr1	11362478	11363236	758
Chr1	11373710	11374659	949
Chr1	11458235	11465885	7650
Chr1	11466537	11473338	6801
Chr1	11490682	11490769	87
Chr1	11492287	11492928	641
Chr1	11514905	11516297	1392
Chr1	11534980	11535660	680
Chr1	11548443	11862422	313979
Chr1	11863377	11864357	980
Chr1	11874231	11874465	234
Chr1	11916698	11916869	171
Chr1	11941989	11945883	3894
Chr1	11991862	11992004	142
Chr1	12003908	12004149	241
Chr1	12050440	12054290	3850
Chr1	12065710	12065855	145
Chr1	12066735	12074164	7429
Chr1	12086059	12086201	142
Chr1	12092521	12092766	245
Chr1	12113817	12114835	1018
Chr1	12120150	12120302	152
Chr1	12126907	12128347	1440
Chr1	12173776	12174144	368
Chr1	12179881	12211663	31782
Chr1	12221878	12233379	11501
Chr1	12276350	12277831	1481
Chr1	12278540	12283784	5244
Chr1	12296323	12296463	140
Chr1	12304589	12305273	684
Chr1	12310383	12310696	313
Chr1	12318520	12319112	592
Chr1	12321648	12321747	99
Chr1	12322167	12322997	830
Chr1	12351965	12352956	991
Chr1	12360531	12364108	3577
Chr1	12376800	12376994	194
Chr1	12380618	12382136	1518
Chr1	12431228	12439282	8054
Chr1	12473632	12473843	211
Chr1	12474816	12475679	863
Chr1	12491563	12491666	103
Chr1	12494007	12494153	146
Chr1	12500140	12500408	268
Chr1	12507364	12507856	492
Chr1	12540940	12541251	311
Chr1	12549032	12549366	334
Chr1	12556338	12557873	1535
Chr1	12614158	12620264	6106
Chr1	12627058	12655281	28223
Chr1	12655507	12655677	170
Chr1	12655853	12669172	13319
Chr1	12669678	12672279	2601
Chr1	12674082	12675531	1449
Chr1	12710518	12726633	16115
Chr1	12733262	12733521	259
Chr1	12734369	12738664	4295
Chr1	12739892	12740585	693
Chr1	12740848	12741556	708
Chr1	12744428	12744957	529
Chr1	12745788	12745994	206
Chr1	12747518	12747716	198
Chr1	12748191	12748856	665
Chr1	12749874	12750234	360
Chr1	12750873	12751045	172
Chr1	12751608	12752117	509
Chr1	12759766	12760103	337
Chr1	12760324	12760895	571
Chr1	12765163	12765333	170
Chr1	12766495	12766843	348
Chr1	12821167	12842709	21542
Chr1	12844579	12845769	1190
Chr1	12846940	12848024	1084
Chr1	12882744	12883521	777
Chr1	12885542	12886030	488
Chr1	12899958	12900209	251
Chr1	12913881	12914227	346
Chr1	12918219	12921264	3045
Chr1	12922676	12928891	6215
Chr1	12942640	12942787	147
Chr1	12966294	12966387	93
Chr1	12984088	13007560	23472
Chr1	13014134	13017270	3136
Chr1	13029263	13032498	3235
Chr1	13040058	13040160	102
Chr1	13045260	13048673	3413
Chr1	13049064	13052231	3167
Chr1	13064687	13071128	6441
Chr1	13103722	13108827	5105
Chr1	13129082	13129222	140
Chr1	13129567	13129996	429
Chr1	13188440	13189504	1064
Chr1	13190377	13190710	333
Chr1	13198804	13275181	76377
Chr1	13276533	13302629	26096
Chr1	13307637	13310683	3046
Chr1	13336738	13337080	342
Chr1	13356698	13356817	119
Chr1	13363528	13407006	43478
Chr1	13411848	13412334	486
Chr1	13414834	13416278	1444
Chr1	13442111	13442280	169
Chr1	13480652	13481054	402
Chr1	13600657	13650883	50226
Chr1	13654251	13670182	15931
Chr1	13670430	13680723	10293
Chr1	13681904	13685652	3748
Chr1	13688220	13688761	541
Chr1	13703226	13715088	11862
Chr1	13757773	13759133	1360
Chr1	13770177	13770513	336
Chr1	13801205	13804831	3626
Chr1	13809231	13809741	510
Chr1	13835498	13845755	10257
Chr1	13869615	13872757	3142
Chr1	13875552	13967520	91968
Chr1	13973860	13976852	2992
Chr1	13983194	13985923	2729
Chr1	14010217	14010408	191
Chr1	14013660	14013922	262
Chr1	14015803	14018097	2294
Chr1	14036096	14045119	9023
Chr1	14063034	14063372	338
Chr1	14183527	14183772	245
Chr1	14184038	14191598	7560
Chr1	14192042	14193720	1678
Chr1	14194780	14197868	3088
Chr1	14205976	14206274	298
Chr1	14209735	14209936	201
Chr1	14212286	14212411	125
Chr1	14213265	14216118	2853
Chr1	14216419	14218051	1632
Chr1	14224777	14224943	166
Chr1	14230064	14230196	132
Chr1	14231354	14234168	2814
Chr1	14239477	14240201	724
Chr1	14250836	14250967	131
Chr1	14263863	14264067	204
Chr1	14275689	14277283	1594
Chr1	14286612	14286886	274
Chr1	14346018	14346193	175
Chr1	14350225	14350339	114
Chr1	14383300	14383567	267
Chr1	14395984	14419483	23499
Chr1	14421181	14421565	384
Chr1	14437552	14440695	3143
Chr1	14460819	14461213	394
Chr1	14471510	14474519	3009
Chr1	14477866	14481714	3848
Chr1	14489988	14497524	7536
Chr1	14498264	14498483	219
Chr1	14499259	14500181	922
Chr1	14502949	14505939	2990
Chr1	14519712	14525948	6236
Chr1	14530191	14536507	6316
Chr1	14541419	14542324	905
Chr1	14544532	14545095	563
Chr1	14547576	14548476	900
Chr1	14549172	14550681	1509
Chr1	14551462	14551971	509
Chr1	14552880	14553211	331
Chr1	14554971	14555979	1008
Chr1	14563253	14563509	256
Chr1	14565410	14566229	819
Chr1	14582207	14583324	1117
Chr1	14583671	14584803	1132
Chr1	14586323	14587152	829
Chr1	14626374	14637041	10667
Chr1	14728874	14728987	113
Chr1	14752489	14765122	12633
Chr1	14796239	14806124	9885
Chr1	14812948	14846918	33970
Chr1	14848089	14848496	407
Chr1	14860401	14864516	4115
Chr1	14903300	14903539	239
Chr1	14903792	14904118	326
Chr1	14906093	14906251	158
Chr1	14922053	14922307	254
Chr1	14923256	14948100	24844
Chr1	14958984	14960823	1839
Chr1	14967580	14973742	6162
Chr1	14985013	14986186	1173
Chr1	14996463	15002432	5969
Chr1	15027339	15027734	395
Chr1	15029030	15029524	494
Chr1	15034540	15035280	740
Chr1	15036103	15038584	2481
Chr1	15040495	15064819	24324
Chr1	15070386	15070652	266
Chr1	15073197	15073775	578
Chr1	15107117	15108042	925
Chr1	15109826	15129486	19660
Chr1	15129779	15132059	2280
Chr1	15132342	15133077	735
Chr1	15137053	15180333	43280
Chr1	15182153	15183298	1145
Chr1	15188100	15191113	3013
Chr1	15192406	15197418	5012
Chr1	15198484	15202349	3865
Chr1	15409073	15420300	11227
Chr1	15436138	15436465	327
Chr1	15470279	15474914	4635
Chr1	15475295	15476575	1280
Chr1	15481292	15481990	698
Chr1	15483241	15486317	3076
Chr1	15487532	15488177	645
Chr1	15491594	15493066	1472
Chr1	15493430	15493686	256
Chr1	15495787	15496387	600
Chr1	15533476	15534039	563
Chr1	15534710	15538274	3564
Chr1	15541140	15545267	4127
Chr1	15545834	15553995	8161
Chr1	15554527	15603048	48521
Chr1	15622241	15645719	23478
Chr1	15671624	15675365	3741
Chr1	15683904	15685513	1609
Chr1	15685863	15686507	644
Chr1	15687237	15688896	1659
Chr1	15689545	15705318	15773
Chr1	15710229	15715248	5019
Chr1	15715678	15715912	234
Chr1	15736159	15737883	1724
Chr1	15766899	15767646	747
Chr1	15771519	15771893	374
Chr1	15775456	15775557	101
Chr1	15776377	15776619	242
Chr1	15780865	15785195	4330
Chr1	15790992	15791227	235
Chr1	15792824	15795856	3032
Chr1	15801528	15801824	296
Chr1	15803937	15804147	210
Chr1	15821614	15821952	338
Chr1	15829365	15829466	101
Chr1	15839765	15852279	12514
Chr1	15875132	15875644	512
Chr1	15899790	15904807	5017
Chr1	15906798	15941049	34251
Chr1	15948282	15950898	2616
Chr1	15952659	15963674	11015
Chr1	15964255	15964854	599
Chr1	15967546	15967658	112
Chr1	15974139	15986205	12066
Chr1	15986651	15989357	2706
Chr1	15990840	15991090	250
Chr1	16002294	16002731	437
Chr1	16003442	16010478	7036
Chr1	16018138	16037371	19233
Chr1	16040066	16040909	843
Chr1	16041380	16045774	4394
Chr1	16049230	16050543	1313
Chr1	16051081	16056702	5621
Chr1	16057950	16058301	351
Chr1	16062369	16067586	5217
Chr1	16068124	16084477	16353
Chr1	16084764	16102234	17470
Chr1	16103015	16103281	266
Chr1	16107793	16108030	237
Chr1	16108518	16126322	17804
Chr1	16128354	16129447	1093
Chr1	16131571	16131714	143
Chr1	16142619	16143293	674
Chr1	16147037	16148662	1625
Chr1	16153441	16154737	1296
Chr1	16164765	16169301	4536
Chr1	16175363	16175453	90
Chr1	16176665	16180716	4051
Chr1	16185199	16197138	11939
Chr1	16207269	16207593	324
Chr1	16208516	16219369	10853
Chr1	16219980	16223416	3436
Chr1	16226233	16234737	8504
Chr1	16235784	16238348	2564
Chr1	16243131	16254189	11058
Chr1	16255638	16262380	6742
Chr1	16268307	16268397	90
Chr1	16269325	16274964	5639
Chr1	16280461	16285035	4574
Chr1	16287155	16293586	6431
Chr1	16299356	16302344	2988
Chr1	16309626	16317112	7486
Chr1	16318869	16326269	7400
Chr1	16328999	16330207	1208
Chr1	16330634	16331069	435
Chr1	16332102	16347737	15635
Chr1	16348399	16348747	348
Chr1	16349245	16353777	4532
Chr1	16358484	16361265	2781
Chr1	16362976	16365560	2584
Chr1	16365968	16366251	283
Chr1	16368168	16373135	4967
Chr1	16380756	16382141	1385
Chr1	16383709	16385700	1991
Chr1	16406097	16409360	3263
Chr1	16410082	16413429	3347
Chr1	16416608	16422721	6113
Chr1	16431173	16435851	4678
Chr1	16453576	16454321	745
Chr1	16528873	16528961	88
Chr1	16549162	16553398	4236
Chr1	16563625	16564195	570
Chr1	16565184	16574631	9447
Chr1	16603780	16608174	4394
Chr1	16613497	16613586	89
Chr1	16636479	16637735	1256
Chr1	16650433	16652210	1777
Chr1	16700819	16703965	3146
Chr1	16733788	16738482	4694
Chr1	16744493	16744677	184
Chr1	16760727	16761227	500
Chr1	16773415	16774045	630
Chr1	16791333	16791454	121
Chr1	16815233	16820010	4777
Chr1	16845594	16846279	685
Chr1	16859803	16860157	354
Chr1	16875212	16887705	12493
Chr1	16919331	16930946	11615
Chr1	16944915	16955971	11056
Chr1	16956751	16956885	134
Chr1	16959210	17015952	56742
Chr1	17016901	17063110	46209
Chr1	17063746	17139053	75307
Chr1	17139462	17157455	17993
Chr1	17159655	17187544	27889
Chr1	17449340	17463259	13919
Chr1	17482839	17486113	3274
Chr1	17487182	17487494	312
Chr1	17488812	17497696	8884
Chr1	17502166	17502514	348
Chr1	17508297	17508626	329
Chr1	17525037	17525371	334
Chr1	17569685	17571059	1374
Chr1	17596861	17596983	122
Chr1	17598055	17599669	1614
Chr1	17613030	17613218	188
Chr1	17616637	17620281	3644
Chr1	17627508	17628202	694
Chr1	17638402	17638509	107
Chr1	17644653	17655020	10367
Chr1	17684569	17684717	148
Chr1	17691115	17697428	6313
Chr1	17701824	17702009	185
Chr1	17728866	17729376	510
Chr1	17733314	17737251	3937
Chr1	17754717	17754921	204
Chr1	17794627	17795512	885
Chr1	17799800	17806276	6476
Chr1	17812181	17813101	920
Chr1	17828937	17829281	344
Chr1	17861797	17884449	22652
Chr1	17885089	17997317	112228
Chr1	17997760	18020060	22300
Chr1	18063579	18069107	5528
Chr1	18070708	18070809	101
Chr1	18094715	18097547	2832
Chr1	18117775	18118330	555
Chr1	18136308	18140908	4600
Chr1	18146078	18146470	392
Chr1	18150511	18151083	572
Chr1	18164193	18165041	848
Chr1	18182075	18182171	96
Chr1	18231778	18231882	104
Chr1	18284263	18284628	365
Chr1	18290772	18291857	1085
Chr1	18295908	18297020	1112
Chr1	18323528	18323619	91
Chr1	18384715	18384999	284
Chr1	18385884	18386466	582
Chr1	18437208	18437339	131
Chr1	18446100	18446275	175
Chr1	18480353	18483688	3335
Chr1	18568754	18568971	217
Chr1	18574280	18580726	6446
Chr1	18588823	18589022	199
Chr1	18606186	18607357	1171
Chr1	18632155	18632509	354
Chr1	18636500	18647750	11250
Chr1	18652906	18660612	7706
Chr1	18668807	18670950	2143
Chr1	18672399	18688877	16478
Chr1	18771755	18772517	762
Chr1	18775128	18775649	521
Chr1	18789144	18799940	10796
Chr1	18854599	18855658	1059
Chr1	18855870	18856001	131
Chr1	18871332	18872472	1140
Chr1	18882812	18885017	2205
Chr1	18915645	18915979	334
Chr1	18938257	18938450	193
Chr1	18983577	18988395	4818
Chr1	19014410	19014918	508
Chr1	19017355	19020183	2828
Chr1	19030561	19033983	3422
Chr1	19048658	19049621	963
Chr1	19053459	19058638	5179
Chr1	19078073	19078396	323
Chr1	19088445	19090850	2405
Chr1	19137817	19138368	551
Chr1	19147177	19150167	2990
Chr1	19159507	19159630	123
Chr1	19162491	19166871	4380
Chr1	19227585	19236606	9021
Chr1	19352413	19352706	293
Chr1	19364258	19364486	228
Chr1	19368293	19373350	5057
Chr1	19374355	19375735	1380
Chr1	19377332	19377466	134
Chr1	19382211	19383695	1484
Chr1	19384491	19389159	4668
Chr1	19483440	19483833	393
Chr1	19521056	19521939	883
Chr1	19529195	19529710	515
Chr1	19614893	19615023	130
Chr1	19694853	19696227	1374
Chr1	19697623	19697739	116
Chr1	19698618	19698941	323
Chr1	19732912	19733149	237
Chr1	19755032	19755149	117
Chr1	19781342	19788564	7222
Chr1	19797278	19797483	205
Chr1	19806955	19818365	11410
Chr1	19892072	19901459	9387
Chr1	19904223	19907469	3246
Chr1	19916681	19955643	38962
Chr1	19971283	19992518	21235
Chr1	19999054	19999564	510
Chr1	20017226	20048854	31628
Chr1	20049597	20129723	80126
Chr1	20130519	20230838	100319
Chr1	20286090	20289580	3490
Chr1	20307747	20307908	161
Chr1	20312412	20313613	1201
Chr1	20355162	20358330	3168
Chr1	20362088	20362202	114
Chr1	20390734	20391353	619
Chr1	20397469	20397757	288
Chr1	20398179	20398287	108
Chr1	20399527	20399783	256
Chr1	20404070	20405056	986
Chr1	20406030	20423798	17768
Chr1	20424457	20428810	4353
Chr1	20429143	20430367	1224
Chr1	20431046	20431286	240
Chr1	20431788	20432078	290
Chr1	20432906	20440515	7609
Chr1	20443469	20444927	1458
Chr1	20445938	20447331	1393
Chr1	20448081	20460026	11945
Chr1	20460721	20461807	1086
Chr1	20462150	20463206	1056
Chr1	20465515	20494909	29394
Chr1	20496403	20522090	25687
Chr1	20523237	20531226	7989
Chr1	20536528	20539925	3397
Chr1	20543761	20544348	587
Chr1	20549051	20549491	440
Chr1	20550082	20554292	4210
Chr1	20558679	20559131	452
Chr1	20560229	20572292	12063
Chr1	20575032	20575545	513
Chr1	20584122	20584278	156
Chr1	20587959	20588543	584
Chr1	20601569	20601975	406
Chr1	20615053	20615268	215
Chr1	20710030	20715380	5350
Chr1	20716920	20717031	111
Chr1	20739515	20746034	6519
Chr1	20746805	20823779	76974
Chr1	20847972	20850771	2799
Chr1	20851911	20855547	3636
Chr1	20873068	20873289	221
Chr1	20898950	20904836	5886
Chr1	20942756	20942869	113
Chr1	20999405	21024686	25281
Chr1	21040564	21040948	384
Chr1	21057514	21061386	3872
Chr1	21066523	21066865	342
Chr1	21069813	21106926	37113
Chr1	21109087	21211525	102438
Chr1	21213094	21228036	14942
Chr1	21241640	21246618	4978
Chr1	21368332	21514135	145803
Chr1	21514255	21517183	2928
Chr1	21536179	21546385	10206
Chr1	21742316	21761166	18850
Chr1	21762569	21763178	609
Chr1	21773053	21774217	1164
Chr1	21776019	21776261	242
Chr1	21783077	21795972	12895
Chr1	21821916	21872770	50854
Chr1	21874095	21874315	220
Chr1	21875558	21879298	3740
Chr1	21885666	21886036	370
Chr1	21898154	21898749	595
Chr1	21907628	21910894	3266
Chr1	21917162	21965384	48222
Chr1	21966085	22067227	101142
Chr1	22067387	22072141	4754
Chr1	22073508	22074560	1052
Chr1	22075672	22403969	328297
Chr1	22405561	22601618	196057
Chr1	22601795	22798308	196513
Chr1	22835716	22842165	6449
Chr1	22850113	22850288	175
Chr1	22911947	22915517	3570
Chr1	22920803	22921411	608
Chr1	22922794	22923709	915
Chr1	22928203	22928343	140
Chr1	22930719	22931259	540
Chr1	22953543	22957736	4193
Chr1	22958372	22959463	1091
Chr1	22960624	22960833	209
Chr1	22961504	22968983	7479
Chr1	22972360	22975202	2842
Chr1	22976417	22976578	161
Chr1	22979593	22980207	614
Chr1	22983191	22987391	4200
Chr1	22990448	22991403	955
Chr1	23007467	23007688	221
Chr1	23020683	23021450	767
Chr1	23024915	23026441	1526
Chr1	23043007	23044380	1373
Chr1	23050145	23062088	11943
Chr1	23088252	23092226	3974
Chr1	23154019	23154146	127
Chr1	23163933	23164023	90
Chr1	23171787	23172769	982
Chr1	23181336	23181783	447
Chr1	23204721	23205260	539
Chr1	23241055	23249009	7954
Chr1	23275026	23275181	155
Chr1	23281063	23281520	457
Chr1	23310934	23311380	446
Chr1	23331971	23332690	719
Chr1	23333248	23333342	94
Chr1	23341252	23341369	117
Chr1	23387741	23394055	6314
Chr1	23509279	23509611	332
Chr1	23519677	23519786	109
Chr1	23522164	23522491	327
Chr1	23523861	23524287	426
Chr1	23555823	23556249	426
Chr1	23557697	23566762	9065
Chr1	23651600	23652702	1102
Chr1	23689736	23699676	9940
Chr1	23718631	23720800	2169
Chr1	23790804	23790999	195
Chr1	23814567	23826524	11957
Chr1	23858064	23858398	334
Chr1	23905551	23918831	13280
Chr1	23926134	23927034	900
Chr1	23933665	23934030	365
Chr1	23937720	23938273	553
Chr1	23962982	23963306	324
Chr1	23969026	23969119	93
Chr1	23976058	23976348	290
Chr1	24007638	24008311	673
Chr1	24008999	24014701	5702
Chr1	24032043	24032934	891
Chr1	24062426	24065416	2990
Chr1	24083488	24084331	843
Chr1	24113365	24118226	4861
Chr1	24119216	24132527	13311
Chr1	24146280	24146785	505
Chr1	24191598	24191706	108
Chr1	24197199	24197566	367
Chr1	24197784	24200213	2429
Chr1	24201472	24205358	3886
Chr1	24214237	24214404	167
Chr1	24219337	24219431	94
Chr1	24243860	24244094	234
Chr1	24320160	24320398	238
Chr1	24322872	24323713	841
Chr1	24323980	24324501	521
Chr1	24325573	24326538	965
Chr1	24327281	24328020	739
Chr1	24329725	24351896	22171
Chr1	24358934	24365366	6432
Chr1	24369956	24372955	2999
Chr1	24457213	24475772	18559
Chr1	24521129	24524293	3164
Chr1	24638741	24638878	137
Chr1	24664092	24666384	2292
Chr1	24741386	24741728	342
Chr1	24741902	24742210	308
Chr1	25004537	25005534	997
Chr1	25067012	25067584	572
Chr1	25094105	25094368	263
Chr1	25135594	25139408	3814
Chr1	25153166	25153306	140
Chr1	25157042	25157249	207
Chr1	25176486	25176689	203
Chr1	25198244	25198360	116
Chr1	25235714	25235808	94
Chr1	25292758	25293112	354
Chr1	25307473	25310049	2576
Chr1	25355655	25355855	200
Chr1	25357951	25358559	608
Chr1	25385365	25385595	230
Chr1	25389442	25395021	5579
Chr1	25396502	25397020	518
Chr1	25400152	25400453	301
Chr1	25401423	25401847	424
Chr1	25421535	25426365	4830
Chr1	25437706	25437889	183
Chr1	25440789	25441008	219
Chr1	25453343	25454506	1163
Chr1	25474854	25478614	3760
Chr1	25494717	25494819	102
Chr1	25495435	25495866	431
Chr1	25521427	25521638	211
Chr1	25527378	25527494	116
Chr1	25535932	25536139	207
Chr1	25601630	25601765	135
Chr1	25669080	25669333	253
Chr1	25680274	25682478	2204
Chr1	25740501	25744340	3839
Chr1	25773474	25773596	122
Chr1	25784811	25785051	240
Chr1	25799765	25800349	584
Chr1	25854527	25861218	6691
Chr1	25897995	25898317	322
Chr1	25924620	25924957	337
Chr1	25925433	25925920	487
Chr1	25957840	25957973	133
Chr1	25999492	26000646	1154
Chr1	26006298	26006455	157
Chr1	26034586	26035227	641
Chr1	26165961	26166892	931
Chr1	26206653	26208040	1387
Chr1	26226950	26233406	6456
Chr1	26290710	26294052	3342
Chr1	26310021	26311290	1269
Chr1	26313554	26324847	11293
Chr1	26330207	26330425	218
Chr1	26536540	26538808	2268
Chr1	26596591	26675353	78762
Chr1	26710339	26723690	13351
Chr1	26724493	26724711	218
Chr1	26726240	26726779	539
Chr1	26736587	26736751	164
Chr1	26810689	26815192	4503
Chr1	26825638	26826979	1341
Chr1	26929276	26939264	9988
Chr1	27011006	27011370	364
Chr1	27053895	27058364	4469
Chr1	27061608	27063143	1535
Chr1	27069520	27081036	11516
Chr1	27228683	27228789	106
Chr1	27265257	27280371	15114
Chr1	27289910	27294482	4572
Chr1	27297364	27298501	1137
Chr1	27343666	27343775	109
Chr1	27381808	27401943	20135
Chr1	27404489	27404622	133
Chr1	27452858	27453777	919
Chr1	27465807	27466076	269
Chr1	27472920	27478350	5430
Chr1	27486881	27492077	5196
Chr1	27544009	27544178	169
Chr1	27558480	27566266	7786
Chr1	27571518	27584389	12871
Chr1	27622468	27627037	4569
Chr1	27642647	27642842	195
Chr1	27645723	27645966	243
Chr1	27654950	27658543	3593
Chr1	27713234	27713606	372
Chr1	27717049	27741198	24149
Chr1	27766370	27766592	222
Chr1	27808383	27812008	3625
Chr1	27844055	27845152	1097
Chr1	27848162	27848405	243
Chr1	27887685	27888198	513
Chr1	27900828	27902135	1307
Chr1	27918603	27918926	323
Chr1	27923062	27923489	427
Chr1	27930246	27930687	441
Chr1	27933210	27933300	90
Chr1	28017630	28026342	8712
Chr1	28188794	28200082	11288
Chr1	28215000	28223633	8633
Chr1	28225526	28253046	27520
Chr1	28253223	28254387	1164
Chr1	28254571	28255689	1118
Chr1	28286153	28288515	2362
Chr1	28289367	28289514	147
Chr1	28290341	28290699	358
Chr1	28296951	28297753	802
Chr1	28306902	28308123	1221
Chr1	28320085	28327224	7139
Chr1	28328400	28329781	1381
Chr1	28335960	28336097	137
Chr1	28339767	28343679	3912
Chr1	28345291	28345384	93
Chr1	28465498	28465598	100
Chr1	28465933	28466354	421
Chr1	28470762	28470970	208
Chr1	28555377	28555759	382
Chr1	28557728	28557960	232
Chr1	28566386	28566706	320
Chr1	28596415	28600439	4024
Chr1	28601593	28613895	12302
Chr1	28701594	28708027	6433
Chr1	28735520	28735887	367
Chr1	28772941	28773900	959
Chr1	28776759	28781551	4792
Chr1	28782693	28782971	278
Chr1	28838371	28851268	12897
Chr1	28937536	28937746	210
Chr1	28946557	28946739	182
Chr1	29019051	29022440	3389
Chr1	29026503	29033804	7301
Chr1	29042428	29043421	993
Chr1	29094434	29094570	136
Chr1	29097382	29099243	1861
Chr1	29105070	29105202	132
Chr1	29119712	29120563	851
Chr1	29158565	29159101	536
Chr1	29163427	29164609	1182
Chr1	29183982	29184858	876
Chr1	29185173	29185603	430
Chr1	29196879	29197309	430
Chr1	29239265	29239872	607
Chr1	29279302	29280477	1175
Chr1	29294304	29294667	363
Chr1	29296189	29296344	155
Chr1	29297021	29297390	369
Chr1	29301105	29301219	114
Chr1	29301529	29304435	2906
Chr1	29306512	29312823	6311
Chr1	29314358	29316715	2357
Chr1	29317214	29317345	131
Chr1	29318015	29319344	1329
Chr1	29321987	29325252	3265
Chr1	29326119	29326991	872
Chr1	29328167	29332132	3965
Chr1	29333349	29335451	2102
Chr1	29337191	29337849	658
Chr1	29339002	29339147	145
Chr1	29447555	29451828	4273
Chr1	29471312	29471738	426
Chr1	29500399	29500648	249
Chr1	29500853	29500943	90
Chr1	29501883	29507491	5608
Chr1	29508288	29508756	468
Chr1	29509603	29509758	155
Chr1	29510690	29511192	502
Chr1	29563609	29563701	92
Chr1	29586375	29589456	3081
Chr1	29608066	29612352	4286
Chr1	29613469	29613663	194
Chr1	29613903	29614087	184
Chr1	29659184	29659278	94
Chr1	29719539	29720218	679
Chr1	29789816	29790476	660
Chr1	29790810	29791049	239
Chr1	29791498	29792138	640
Chr1	29792689	29845556	52867
Chr1	29847156	29847686	530
Chr1	29886698	29899613	12915
Chr1	29968482	29969372	890
Chr1	29974203	29974565	362
Chr1	29974916	29981322	6406
Chr1	29981498	29987149	5651
Chr1	29988928	29989061	133
Chr1	30131053	30131342	289
Chr1	30138646	30151564	12918
Chr1	30152994	30155993	2999
Chr1	30163793	30171501	7708
Chr1	30184402	30184563	161
Chr1	30209804	30217860	8056
Chr1	30327598	30327863	265
Chr1	30328203	30330830	2627
Chr1	30337472	30337747	275
Chr1	30338306	30338572	266
Chr1	30345580	30345807	227
Chr1	30349656	30349838	182
Chr1	30351379	30353395	2016
Chr1	30362140	30362870	730
Chr1	30366025	30366263	238
Chr1	30367730	30367952	222
Chr1	30371212	30372095	883
Chr1	30372739	30373068	329
Chr1	30388888	30391643	2755
Chr1	30392754	30393293	539
Chr1	30397138	30397310	172
Chr1	30410311	30410750	439
Chr1	30410904	30411507	603
Chr1	30420773	30424697	3924
Chr1	30429923	30430170	247
Chr1	30473191	30473430	239
Chr1	30477996	30515824	37828
Chr1	30516217	30516977	760
Chr1	30518086	30518433	347
Chr1	30518824	30520579	1755
Chr1	30521289	30521437	148
Chr1	30541989	30542083	94
Chr1	30544041	30545416	1375
Chr1	30553958	30554193	235
Chr1	30556348	30557091	743
Chr1	30624875	30625297	422
Chr1	30641238	30641376	138
Chr1	30671670	30671810	140
Chr1	30684400	30689675	5275
Chr1	30696591	30696892	301
Chr1	30741189	30741452	263
Chr1	31031551	31031708	157
Chr1	31283042	31283185	143
Chr1	31367383	31370888	3505
Chr1	31371465	31383418	11953
Chr1	31438370	31438533	163
Chr1	31537676	31537772	96
Chr1	31549489	31551119	1630
Chr1	32170268	32170388	120
Chr1	32635980	32640212	4232
Chr1	33117244	33117414	170
Chr1	33217610	33217886	276
Chr1	33240338	33240506	168
Chr1	33282798	33283112	314
Chr1	33292605	33296288	3683
Chr1	33296586	33296865	279
Chr1	33297320	33297875	555
Chr1	33298037	33299204	1167
Chr1	33308422	33309064	642
Chr1	33343003	33343236	233
Chr1	33343535	33348616	5081
Chr1	33349183	33349486	303
Chr1	33349727	33352179	2452
Chr1	33363470	33363562	92
Chr1	33396222	33397327	1105
Chr1	33397952	33405507	7555
Chr1	33412100	33412348	248
Chr1	33427876	33429089	1213
Chr1	33494722	33495057	335
Chr1	33549044	33549457	413
Chr1	33552265	33565938	13673
Chr1	33578206	33581977	3771
Chr1	33620655	33620810	155
Chr1	33626635	33626816	181
Chr1	33677215	33677457	242
Chr1	33691067	33691774	707
Chr1	33753772	33754055	283
Chr1	33839971	33840996	1025
Chr1	33841281	33852602	11321
Chr1	34107550	34107638	88
Chr1	34132125	34132294	169
Chr1	34144864	34144971	107
Chr1	34164343	34164455	112
Chr1	34182924	34183041	117
Chr1	34685344	34685493	149
Chr1	34821281	34821472	191
Chr1	34914836	35089864	175028
Chr1	35423212	35423350	138
Chr1	35625978	35637391	11413
Chr1	35658559	35658821	262
Chr1	35662949	35664354	1405
Chr1	35697830	35707543	9713
Chr1	35773794	35774220	426
Chr1	36129083	36137016	7933
Chr1	36495676	36495879	203
Chr1	36516520	36520372	3852
Chr1	36527949	36528462	513
Chr1	36533145	36533279	134
Chr1	36543434	36544258	824
Chr1	36549454	36550138	684
Chr1	36582824	36583682	858
Chr1	36598498	36598607	109
Chr1	36621611	36634486	12875
Chr1	36669593	36669960	367
Chr1	36704218	36705222	1004
Chr1	36733547	36734346	799
Chr1	36886384	36888242	1858
Chr1	36909486	36909682	196
Chr1	36944507	36944617	110
Chr1	36991078	36992298	1220
Chr1	37017866	37020874	3008
Chr1	37028074	37029102	1028
Chr1	37117452	37117717	265
Chr1	37218830	37219393	563
Chr1	37219669	37219842	173
Chr1	37265481	37265591	110
Chr1	37266537	37275381	8844
Chr1	37290698	37290792	94
Chr1	37365225	37365563	338
Chr1	37370482	37371711	1229
Chr1	37412256	37413421	1165
Chr1	37418356	37426494	8138
Chr1	37460767	37461526	759
Chr1	37462241	37462350	109
Chr1	37464031	37464602	571
Chr1	37465723	37465878	155
Chr1	37534324	37534592	268
Chr1	37547100	37559087	11987
Chr1	37561274	37594072	32798
Chr1	37611764	37616777	5013
Chr1	37681390	37682953	1563
Chr1	37705453	37709245	3792
Chr1	37711866	37716683	4817
Chr1	37730199	37734125	3926
Chr1	37821215	37832646	11431
Chr1	37834271	37839244	4973
Chr1	37845718	37862909	17191
Chr1	37879068	37882779	3711
Chr1	37890392	37892638	2246
Chr1	37904596	37906494	1898
Chr1	37907195	37924077	16882
Chr1	37963593	37963702	109
Chr1	37974793	37975656	863
Chr1	37977581	37977844	263
Chr1	37999449	37999618	169
Chr1	38039179	38039268	89
Chr1	38097759	38099234	1475
Chr1	38117657	38118767	1110
Chr1	38131212	38136089	4877
Chr1	38143991	38144494	503
Chr1	38208673	38225968	17295
Chr1	38255490	38258820	3330
Chr1	38292297	38293056	759
Chr1	38296626	38299649	3023
Chr1	38301644	38301778	134
Chr1	38350837	38351359	522
Chr1	38359266	38362790	3524
Chr1	38363239	38364165	926
Chr1	38364403	38364515	112
Chr1	38364699	38365034	335
Chr1	38367681	38368284	603
Chr1	38368534	38368834	300
Chr1	38392455	38393079	624
Chr1	38393972	38394317	345
Chr1	38394425	38394723	298
Chr1	38395373	38401959	6586
Chr1	38402548	38403087	539
Chr1	38403341	38403561	220
Chr1	38404240	38404698	458
Chr1	38487997	38488508	511
Chr1	38492580	38494545	1965
Chr1	38631680	38632040	360
Chr1	38633391	38634597	1206
Chr1	38644108	38645472	1364
Chr1	38647525	38648371	846
Chr1	38656482	38656702	220
Chr1	38678563	38678851	288
Chr1	38719223	38719503	280
Chr1	38728338	38731004	2666
Chr1	38844019	38844744	725
Chr1	38848172	38848982	810
Chr1	38895593	38898328	2735
Chr1	38903877	38903991	114
Chr1	38912778	38914465	1687
Chr1	38918719	38920298	1579
Chr1	38956768	38957728	960
Chr1	38959221	38959836	615
Chr1	38994945	38995091	146
Chr1	39015253	39015616	363
Chr1	39093693	39094058	365
Chr1	39127792	39128211	419
Chr1	39160368	39162132	1764
Chr1	39179563	39179923	360
Chr1	39208815	39210852	2037
Chr1	39305772	39309333	3561
Chr1	39329941	39330249	308
Chr1	39350117	39350232	115
Chr1	39381697	39395221	13524
Chr1	39415299	39415533	234
Chr1	39436243	39436462	219
Chr1	39489995	39490094	99
Chr1	39500811	39503878	3067
Chr1	39522102	39523495	1393
Chr1	39541032	39541166	134
Chr1	39551109	39551587	478
Chr1	39584623	39590323	5700
Chr1	39601488	39601804	316
Chr1	39630511	39631252	741
Chr1	39711720	39711812	92
Chr1	39800618	39800805	187
Chr1	39801300	39801536	236
Chr1	39811804	39814946	3142
Chr1	39823427	39823527	100
Chr1	39862063	39877936	15873
Chr1	39878590	39878747	157
Chr1	39885719	39890243	4524
Chr1	39893686	39895168	1482
Chr1	39895306	39897342	2036
Chr1	39897793	39899120	1327
Chr1	39900548	39901543	995
Chr1	39905524	39912201	6677
Chr1	39917140	39921110	3970
Chr1	39964961	39965120	159
Chr1	39971704	39971807	103
Chr1	39973158	39975015	1857
Chr1	39977034	39977167	133
Chr1	39998669	39998828	159
Chr1	40145405	40145493	88
Chr1	40153783	40154833	1050
Chr1	40188354	40188614	260
Chr1	40218170	40221885	3715
Chr1	40222083	40222363	280
Chr1	40242123	40242281	158
Chr1	40325050	40325202	152
Chr1	40344918	40346362	1444
Chr1	40349441	40350070	629
Chr1	40360880	40361813	933
Chr1	40368840	40374289	5449
Chr1	40374521	40380833	6312
Chr1	40391765	40392143	378
Chr1	40419677	40422551	2874
Chr1	40442003	40446716	4713
Chr1	40458491	40460605	2114
Chr1	40468834	40469172	338
Chr1	40502182	40503649	1467
Chr1	40519392	40520384	992
Chr1	40548434	40548915	481
Chr1	40551612	40555967	4355
Chr1	40559375	40562019	2644
Chr1	40687218	40694958	7740
Chr1	40707144	40707296	152
Chr1	40710558	40710696	138
Chr1	40713449	40713685	236
Chr1	40715626	40715899	273
Chr1	40716052	40716681	629
Chr1	40716790	40717384	594
Chr1	40718934	40719940	1006
Chr1	40761245	40761391	146
Chr1	40787243	40801238	13995
Chr1	40875872	40876208	336
Chr1	40877755	40877937	182
Chr1	41017855	41021277	3422
Chr1	41022953	41023092	139
Chr1	41036340	41036471	131
Chr1	41042955	41043082	127
Chr1	41082369	41087643	5274
Chr1	41090847	41091118	271
Chr1	41101834	41101976	142
Chr1	41103321	41103661	340
Chr1	41116063	41119426	3363
Chr1	41130854	41132166	1312
Chr1	41132955	41134163	1208
Chr1	41237023	41241010	3987
Chr1	41260901	41424522	163621
Chr1	41424859	41625182	200323
Chr1	41646024	41646363	339
Chr1	41695004	41695224	220
Chr1	41696144	41696380	236
Chr1	41745999	41746133	134
Chr1	41747471	41747595	124
Chr1	41764140	41764825	685
Chr1	41774276	41774512	236
Chr1	41792765	41792875	110
Chr1	41797185	41797311	126
Chr1	41896506	41901624	5118
Chr1	41947152	41947272	120
Chr1	41950200	41950289	89
Chr1	41981081	41984857	3776
Chr1	42015363	42015474	111
Chr1	42074206	42080573	6367
Chr1	42137970	42138189	219
Chr1	42152149	42152373	224
Chr1	42170602	42175478	4876
Chr1	42194211	42194359	148
Chr1	42289696	42290224	528
Chr1	42343304	42343433	129
Chr1	42371550	42371903	353
Chr1	42383477	42387290	3813
Chr1	42451102	42451313	211
Chr1	42618543	42618780	237
Chr1	42648577	42654361	5784
Chr1	42677553	42677640	87
Chr1	42688618	42688818	200
Chr1	42689020	42694536	5516
Chr1	42697377	42712680	15303
Chr1	42715507	42775177	59670
Chr1	42787276	42787570	294
Chr1	42806041	42806393	352
Chr1	42837059	42842133	5074
Chr1	42842865	42843080	215
Chr1	42843270	42845397	2127
Chr1	42847889	42848039	150
Chr1	42859638	42860025	387
Chr1	42873262	42885939	12677
Chr1	42889462	42889614	152
Chr1	42891542	42891995	453
Chr1	42907595	42910160	2565
Chr1	44091786	44092032	246
Chr1	44243704	44243838	134
Chr10	148696	149370	674
Chr10	163170	163278	108
Chr10	177845	178017	172
Chr10	180230	180350	120
Chr10	188006	188255	249
Chr10	196398	202649	6251
Chr10	241359	275208	33849
Chr10	294611	294853	242
Chr10	322283	323729	1446
Chr10	342342	342501	159
Chr10	343071	343279	208
Chr10	343788	344252	464
Chr10	351900	352135	235
Chr10	405531	411842	6311
Chr10	442826	443160	334
Chr10	455703	455867	164
Chr10	477293	477429	136
Chr10	488908	494703	5795
Chr10	499274	499949	675
Chr10	511832	514983	3151
Chr10	541278	576284	35006
Chr10	589168	589743	575
Chr10	625549	625700	151
Chr10	631755	636153	4398
Chr10	645194	652459	7265
Chr10	666557	670213	3656
Chr10	737181	737591	410
Chr10	750688	750958	270
Chr10	754001	759633	5632
Chr10	784043	786533	2490
Chr10	813011	813596	585
Chr10	816157	818025	1868
Chr10	818625	820641	2016
Chr10	823266	831446	8180
Chr10	832508	840704	8196
Chr10	841081	842060	979
Chr10	843386	843648	262
Chr10	844980	845140	160
Chr10	850011	850387	376
Chr10	856956	857665	709
Chr10	859322	860006	684
Chr10	862560	867644	5084
Chr10	885686	885942	256
Chr10	887929	888203	274
Chr10	908534	909049	515
Chr10	941900	942117	217
Chr10	948157	948368	211
Chr10	949921	953472	3551
Chr10	964077	977080	13003
Chr10	984685	985785	1100
Chr10	986366	987560	1194
Chr10	989244	1001573	12329
Chr10	1009734	1010220	486
Chr10	1045930	1054071	8141
Chr10	1056709	1062538	5829
Chr10	1063274	1088452	25178
Chr10	1126511	1127824	1313
Chr10	1149528	1160824	11296
Chr10	1163033	1166882	3849
Chr10	1192087	1195658	3571
Chr10	1222261	1228669	6408
Chr10	1251928	1271129	19201
Chr10	1272852	1359080	86228
Chr10	1360786	1362952	2166
Chr10	1373787	1385921	12134
Chr10	1392223	1393887	1664
Chr10	1395340	1395962	622
Chr10	1405643	1408691	3048
Chr10	1413425	1423330	9905
Chr10	1464744	1468322	3578
Chr10	1492594	1492696	102
Chr10	1519333	1519812	479
Chr10	1520796	1521241	445
Chr10	1524101	1525769	1668
Chr10	1526070	1526365	295
Chr10	1561272	1562436	1164
Chr10	1563389	1563653	264
Chr10	1564133	1565238	1105
Chr10	1568654	1591930	23276
Chr10	1603689	1604580	891
Chr10	1605113	1606479	1366
Chr10	1609022	1609895	873
Chr10	1610931	1612581	1650
Chr10	1613843	1624803	10960
Chr10	1627298	1627528	230
Chr10	1638441	1642127	3686
Chr10	1650856	1650989	133
Chr10	1651625	1652573	948
Chr10	1670592	1670782	190
Chr10	1671880	1672056	176
Chr10	1684580	1684673	93
Chr10	1689091	1689806	715
Chr10	1690891	1691302	411
Chr10	1692838	1699613	6775
Chr10	1702594	1712011	9417
Chr10	1713391	1718024	4633
Chr10	1718848	1723402	4554
Chr10	1737592	1741094	3502
Chr10	1775189	1776522	1333
Chr10	1825988	1830699	4711
Chr10	1835185	1838709	3524
Chr10	1847326	1847452	126
Chr10	1862524	1866568	4044
Chr10	1869713	1869828	115
Chr10	1873861	1879620	5759
Chr10	1882599	1884134	1535
Chr10	1886236	1887488	1252
Chr10	1904215	1904398	183
Chr10	1905929	1906870	941
Chr10	1943940	1966029	22089
Chr10	1968899	1970597	1698
Chr10	1971438	1977469	6031
Chr10	1979201	2003599	24398
Chr10	2003742	2123351	119609
Chr10	2123458	2124028	570
Chr10	2125988	2126441	453
Chr10	2133275	2133834	559
Chr10	2136730	2136969	239
Chr10	2137463	2138902	1439
Chr10	2139899	2140648	749
Chr10	2141770	2142825	1055
Chr10	2144318	2148162	3844
Chr10	2154424	2155946	1522
Chr10	2156823	2157059	236
Chr10	2173807	2174240	433
Chr10	2177114	2177397	283
Chr10	2178869	2178973	104
Chr10	2186415	2189811	3396
Chr10	2195561	2195883	322
Chr10	2213143	2213663	520
Chr10	2221402	2221837	435
Chr10	2224660	2225052	392
Chr10	2239013	2244268	5255
Chr10	2257145	2257757	612
Chr10	2274005	2303510	29505
Chr10	2304605	2305615	1010
Chr10	2307072	2307203	131
Chr10	2308641	2311217	2576
Chr10	2314995	2315280	285
Chr10	2316200	2320081	3881
Chr10	2321107	2322556	1449
Chr10	2326877	2340870	13993
Chr10	2344181	2344881	700
Chr10	2346250	2347806	1556
Chr10	2349923	2351866	1943
Chr10	2352535	2353084	549
Chr10	2357956	2361520	3564
Chr10	2382723	2383292	569
Chr10	2399458	2411109	11651
Chr10	2414370	2419716	5346
Chr10	2431337	2447353	16016
Chr10	2531687	2551092	19405
Chr10	2577793	2582027	4234
Chr10	2594572	2597952	3380
Chr10	2619606	2620430	824
Chr10	2629934	2630178	244
Chr10	2636965	2638476	1511
Chr10	2684368	2688371	4003
Chr10	2692173	2692320	147
Chr10	2708022	2713370	5348
Chr10	2716963	2719847	2884
Chr10	2722415	2725258	2843
Chr10	2725932	2726613	681
Chr10	2727582	2728039	457
Chr10	2731723	2732165	442
Chr10	2736309	2737105	796
Chr10	2813569	2813745	176
Chr10	2820996	2824262	3266
Chr10	2824895	2825035	140
Chr10	2840053	2840344	291
Chr10	2852367	2852872	505
Chr10	2853846	2854109	263
Chr10	2857338	2857501	163
Chr10	2863070	2863335	265
Chr10	2928118	2929454	1336
Chr10	2935920	2948217	12297
Chr10	2949962	2950333	371
Chr10	2955799	2957049	1250
Chr10	2958435	2960515	2080
Chr10	2963524	2964086	562
Chr10	2964230	2964479	249
Chr10	2968504	2975873	7369
Chr10	2978006	2979304	1298
Chr10	2980158	2980621	463
Chr10	2982170	2982308	138
Chr10	2985945	2986515	570
Chr10	2987816	2987959	143
Chr10	2990635	2990778	143
Chr10	2994553	2994756	203
Chr10	2997240	3005067	7827
Chr10	3006020	3006750	730
Chr10	3008488	3011776	3288
Chr10	3015711	3021867	6156
Chr10	3022782	3032616	9834
Chr10	3033645	3033831	186
Chr10	3033937	3040386	6449
Chr10	3041064	3046214	5150
Chr10	3050005	3053587	3582
Chr10	3054664	3062060	7396
Chr10	3063739	3067182	3443
Chr10	3070422	3070983	561
Chr10	3080086	3080231	145
Chr10	3102137	3103492	1355
Chr10	3104885	3106937	2052
Chr10	3107898	3108518	620
Chr10	3109816	3109965	149
Chr10	3110076	3110380	304
Chr10	3110890	3112220	1330
Chr10	3113439	3115956	2517
Chr10	3158286	3158959	673
Chr10	3160362	3160859	497
Chr10	3166352	3168238	1886
Chr10	3171047	3185848	14801
Chr10	3215143	3221576	6433
Chr10	3224751	3236336	11585
Chr10	3236855	3244444	7589
Chr10	3246624	3253814	7190
Chr10	3262163	3315750	53587
Chr10	3424594	3436828	12234
Chr10	3437415	3437784	369
Chr10	3442554	3454528	11974
Chr10	3509144	3509375	231
Chr10	3518761	3519004	243
Chr10	3610766	3612133	1367
Chr10	3621630	3623421	1791
Chr10	3674943	3675032	89
Chr10	3690582	3690682	100
Chr10	3694558	3716508	21950
Chr10	3721468	3727866	6398
Chr10	3746126	3747997	1871
Chr10	3751966	3752475	509
Chr10	3791090	3793843	2753
Chr10	3822156	3823036	880
Chr10	3825519	3826304	785
Chr10	3826721	3828331	1610
Chr10	3829360	3832702	3342
Chr10	3835786	3835916	130
Chr10	3840245	3840534	289
Chr10	3841032	3841595	563
Chr10	3842175	3843745	1570
Chr10	3846898	3875053	28155
Chr10	3876848	3920409	43561
Chr10	3921451	3921756	305
Chr10	3924995	3925256	261
Chr10	3928958	3930179	1221
Chr10	3930751	3934114	3363
Chr10	3936721	3939249	2528
Chr10	3945844	3945954	110
Chr10	3956804	3964088	7284
Chr10	3988800	3989059	259
Chr10	3989535	3989879	344
Chr10	4031298	4031668	370
Chr10	4043219	4043362	143
Chr10	4084644	4085321	677
Chr10	4085934	4086911	977
Chr10	4091217	4096298	5081
Chr10	4102932	4106599	3667
Chr10	4111222	4112035	813
Chr10	4113452	4114383	931
Chr10	4123538	4289506	165968
Chr10	4327109	4341341	14232
Chr10	4342399	4387680	45281
Chr10	4392575	4392998	423
Chr10	4393490	4393589	99
Chr10	4394175	4394662	487
Chr10	4396542	4396789	247
Chr10	4438675	4439192	517
Chr10	4439948	4441139	1191
Chr10	4454557	4460978	6421
Chr10	4478024	4478316	292
Chr10	4479280	4480799	1519
Chr10	4482212	4483522	1310
Chr10	4484153	4486150	1997
Chr10	4503169	4506341	3172
Chr10	4534623	4534872	249
Chr10	4535366	4546742	11376
Chr10	4558967	4559101	134
Chr10	4562858	4563372	514
Chr10	4620673	4627580	6907
Chr10	4639037	4639515	478
Chr10	4651379	4652266	887
Chr10	4685747	4689170	3423
Chr10	4691767	4692107	340
Chr10	4692461	4705149	12688
Chr10	4707159	4717741	10582
Chr10	4721552	4724463	2911
Chr10	4734530	4739942	5412
Chr10	4756700	4756856	156
Chr10	4774472	4774680	208
Chr10	4780888	4784068	3180
Chr10	4785340	4788823	3483
Chr10	4795642	4818257	22615
Chr10	4833628	4833798	170
Chr10	4852474	4853023	549
Chr10	4865304	4865547	243
Chr10	4870552	4879546	8994
Chr10	4904957	4906005	1048
Chr10	4944404	4945025	621
Chr10	4954548	4955168	620
Chr10	4966021	4977428	11407
Chr10	4979380	4979498	118
Chr10	5138689	5157957	19268
Chr10	5175868	5181158	5290
Chr10	5193009	5193343	334
Chr10	5196192	5196592	400
Chr10	5198383	5199348	965
Chr10	5214557	5217612	3055
Chr10	5222708	5224431	1723
Chr10	5225929	5237611	11682
Chr10	5259988	5262675	2687
Chr10	5268632	5272250	3618
Chr10	5272837	5273424	587
Chr10	5276686	5276877	191
Chr10	5277235	5277552	317
Chr10	5282143	5283261	1118
Chr10	5283991	5292350	8359
Chr10	5292525	5292742	217
Chr10	5294083	5297058	2975
Chr10	5298056	5312288	14232
Chr10	5313564	5316140	2576
Chr10	5317302	5366434	49132
Chr10	5367517	5387558	20041
Chr10	5399936	5476982	77046
Chr10	5478146	5479022	876
Chr10	5479223	5480891	1668
Chr10	5488366	5491383	3017
Chr10	5492914	5497014	4100
Chr10	5498556	5510305	11749
Chr10	5511850	5518131	6281
Chr10	5522037	5523402	1365
Chr10	5524320	5524553	233
Chr10	5525126	5526196	1070
Chr10	5526647	5526747	100
Chr10	5528398	5532506	4108
Chr10	5582993	5589217	6224
Chr10	5604173	5605099	926
Chr10	5616326	5616457	131
Chr10	5670056	5677441	7385
Chr10	5678201	5678706	505
Chr10	5681781	5686725	4944
Chr10	5715306	5739958	24652
Chr10	5745079	5746712	1633
Chr10	5748811	5754761	5950
Chr10	5777382	5777652	270
Chr10	5782139	5784779	2640
Chr10	5797962	5798168	206
Chr10	5804224	5810829	6605
Chr10	5949306	5949839	533
Chr10	6010730	6011111	381
Chr10	6049775	6055091	5316
Chr10	6619317	6620638	1321
Chr10	6693398	6693566	168
Chr10	6700656	6703767	3111
Chr10	6717770	6721322	3552
Chr10	6741852	6741941	89
Chr10	6747639	6747758	119
Chr10	6749784	6773872	24088
Chr10	6825583	6836840	11257
Chr10	6842479	6855428	12949
Chr10	6869803	6881874	12071
Chr10	6930106	6933521	3415
Chr10	7001223	7001606	383
Chr10	7035026	7092240	57214
Chr10	7100393	7100545	152
Chr10	7103254	7109544	6290
Chr10	7111465	7119330	7865
Chr10	7120448	7124735	4287
Chr10	7280021	7291342	11321
[truncated: 12,432 more rows]

## Sheet: Inversions
Additional file 5 Comparative genomic analysis between KitaakeX and Zhenshan97
Chromosome	Start position	End position	Size (bp)
Chr1	806931	809189	2259
Chr1	5553275	5554618	1343
Chr1	12364108	12376800	12639
Chr1	21813384	21817033	3645
Chr1	28104387	28107059	2671
Chr1	35943891	35946635	2733
Chr1	38893458	38895593	2137
Chr10	8132467	8139679	7171
Chr10	8141376	8149559	8173
Chr10	8152649	8158229	5560
Chr10	8158233	8162972	4740
Chr10	8170730	8174756	4009
Chr10	9466266	9471574	5306
Chr10	9574396	9576748	2351
Chr10	9814704	9817000	2297
Chr10	10072390	10075918	3527
Chr10	10299122	10301211	2095
Chr10	10303685	10337111	33394
Chr10	10438298	10441400	3102
Chr10	11480966	11488324	7357
Chr10	14601286	14611396	10089
Chr10	15853737	15855893	2156
Chr10	19698568	19701737	3169
Chr10	21635354	21660235	24969
Chr11	1591374	1595002	3615
Chr11	1713281	1718043	4770
Chr11	2476973	2478069	1093
Chr11	4662126	4664919	2793
Chr11	4712978	4724216	11234
Chr11	4724212	4729676	5443
Chr11	11843655	11845827	2169
Chr11	12551242	12555473	4232
Chr11	12568891	12588894	19968
Chr11	12589354	12594306	4952
Chr11	12601878	12603111	1234
Chr11	13127469	13136224	8750
Chr11	13136220	13139975	3752
Chr11	13154703	13159900	5195
Chr11	14073366	14074455	1086
Chr11	14485396	14488120	2727
Chr11	14522924	14542279	19342
Chr11	14542364	14566138	23793
Chr11	14587766	14595033	7289
Chr11	14595040	14599170	4133
Chr11	14601907	14607539	5634
Chr11	14607522	14608709	1183
Chr11	14608697	14618589	9860
Chr11	14618585	14624200	5637
Chr11	14646254	14647478	1224
Chr11	14647472	14652398	4925
Chr11	14815994	14819836	3868
Chr11	14819832	14823380	3538
Chr11	14824246	14828112	3866
Chr11	14829248	14837670	8434
Chr11	14837666	14845287	7615
Chr11	14850215	14868755	18563
Chr11	16080240	16082817	2558
Chr11	16831874	16836776	4920
Chr11	16885991	16887026	1034
Chr11	17009517	17014573	5068
Chr11	17360304	17372435	12163
Chr11	17380146	17385285	5141
Chr11	17464401	17474697	10300
Chr11	17474889	17478256	3368
Chr11	17478252	17489500	11204
Chr11	18208964	18211945	2984
Chr11	23277727	23280427	2675
Chr11	28391516	28404283	12783
Chr11	28630827	28633260	2433
Chr12	10235229	10249687	14484
Chr12	10252714	10256053	3371
Chr12	10256048	10257519	1481
Chr12	10257852	10261523	3688
Chr12	10511598	10514390	2802
Chr12	11428182	11429265	1079
Chr12	12968880	12971890	3010
Chr12	14492401	14493717	1316
Chr12	14493716	14497068	3352
Chr12	14497136	14501035	3907
Chr12	14535366	14578235	43034
Chr12	14578231	14589321	11081
Chr12	14590395	14592865	2471
Chr12	14594082	14609337	15173
Chr12	14691329	14692826	1494
Chr12	17567347	17570639	3310
Chr12	19149822	19153443	3613
Chr12	19153452	19167693	14271
Chr12	19311414	19313995	2568
Chr12	19348026	19356934	8968
Chr12	20179168	20180490	1322
Chr12	24069525	24071653	2141
Chr2	1001734	1003376	1642
Chr2	4746890	4750674	3784
Chr2	11620391	11624903	4526
Chr2	14429968	14431565	1598
Chr2	14582835	14591694	8868
Chr2	18019411	18022553	3144
Chr2	18645665	18647909	2245
Chr2	18648437	18653451	5017
Chr2	18830058	18832343	2286
Chr2	20460128	20461192	1064
Chr2	30697729	30717595	19778
Chr2	30718948	30753922	34917
Chr2	30753917	30759157	5232
Chr2	30760623	30764916	4289
Chr2	30766423	30770372	3942
Chr2	30770379	30788192	17825
Chr2	30789112	30792945	3836
Chr2	30792938	30794197	1259
Chr2	30921342	30924486	3143
Chr2	36657398	36663268	5869
Chr3	314989	318359	3361
Chr3	11052470	11056785	4315
Chr3	13479830	13481744	1911
Chr3	13509053	13510105	1052
Chr3	13513361	13514805	1442
Chr3	19421515	19425347	3822
Chr3	19429531	19440805	11288
Chr3	19458766	19462417	3657
Chr3	19492920	19510411	17506
Chr3	19520345	19528039	7686
Chr3	19528038	19531446	3407
Chr3	19571673	19583497	11837
Chr3	19586475	19588671	2194
Chr3	19588667	19591744	3076
Chr3	19598822	19609107	10310
Chr3	19609103	19647060	37960
Chr3	19680935	19691615	10680
Chr3	19693275	19695955	2681
Chr3	19695948	19697034	1088
Chr3	19711204	19716347	5143
Chr3	19736959	19743306	6339
Chr3	19756073	19759638	3566
Chr3	19782340	19789573	7219
Chr3	21016131	21017752	1615
Chr3	21017748	21018791	1043
Chr3	22766051	22767564	1510
Chr3	24364526	24366347	1821
Chr3	24762062	24765305	3247
Chr3	27495145	27497696	2551
Chr3	35374786	35378176	3377
Chr3	36141392	36147706	6298
Chr3	36147708	36155061	7389
Chr4	63682	65734	2052
Chr4	2210934	2215228	4288
Chr4	2215659	2226290	10649
Chr4	2226530	2227594	1064
Chr4	2230786	2233042	2267
Chr4	2231818	2237022	5209
Chr4	2551973	2554082	2106
Chr4	2554238	2555790	1552
Chr4	8610173	8617341	7157
Chr4	9462927	9464049	1120
Chr4	9465975	9469644	3663
Chr4	10469071	10470396	1324
Chr4	11807669	11810242	2571
Chr4	14934179	14938137	3959
Chr4	14956979	14959323	2336
Chr4	14977855	14988917	11016
Chr4	14989034	15010443	21497
Chr4	15042558	15064695	22086
Chr4	15068980	15088830	19826
Chr4	15356316	15402544	46212
Chr4	15405550	15473194	67621
Chr4	15688405	15778426	90030
Chr4	15872323	15992776	120297
Chr4	15992784	16005124	12352
Chr4	16046873	16057551	10747
Chr4	16071845	16079011	7168
Chr4	16079007	16087937	8873
Chr4	16115928	16118671	2749
Chr4	17533897	17569068	35177
Chr4	22261083	22263046	1971
Chr4	28132514	28147293	14767
Chr4	28173883	28177645	3743
Chr4	30324940	30340596	15699
Chr4	30340591	30358399	17884
Chr4	31863083	31865877	2796
Chr5	1579754	1584287	4533
Chr5	4667085	4672192	5107
Chr5	4672193	4674679	2456
Chr5	4693130	4697576	4456
Chr5	7406964	7415069	8095
Chr5	7415029	7420509	5478
Chr5	10470999	10498154	27153
Chr5	10527114	10571929	44795
Chr5	11338052	11537390	199214
Chr5	11537374	11615884	78519
Chr5	12759676	12764122	4446
Chr5	15178811	15180586	1775
Chr5	16200217	16204256	4038
Chr5	16662013	16664870	2857
Chr5	25016272	25019855	3572
Chr5	28678153	28679809	1652
Chr6	3598383	3601791	3404
Chr6	3608902	3614908	6000
Chr6	6520648	6521818	1169
Chr6	8072505	8078217	5712
Chr6	11183234	11185639	2410
Chr6	11185843	11189770	3927
Chr6	13476646	13478034	1389
Chr6	14202033	14203498	1465
Chr6	16021257	16025274	4014
Chr6	16025265	16036973	11686
Chr6	16037116	16038477	1355
Chr6	16038616	16055191	16518
Chr6	16055290	16061038	5753
Chr6	16061093	16071069	9894
Chr6	16279211	16282261	3038
Chr6	16280748	16292081	11269
Chr6	18073572	18075029	1457
Chr6	21636057	21643158	7090
Chr6	22137533	22141298	3754
Chr6	22141291	22143918	2624
Chr6	25097355	25107798	10445
Chr6	26713445	26717141	3654
Chr7	1880179	1881335	1150
Chr7	1881295	1883753	2469
Chr7	1883752	1887060	3326
Chr7	1887206	1891560	4351
Chr7	4337193	4338540	1348
Chr7	8652502	8659408	6896
Chr7	9345129	9346133	1005
Chr7	9346641	9349084	2445
Chr7	9384676	9421003	36160
Chr7	9420999	9431148	10125
Chr7	9431749	9435827	4081
Chr7	9441887	9443626	1739
Chr7	9443612	9452440	8821
Chr7	9452438	9458362	5920
Chr7	9458361	9459906	1535
Chr7	9495401	9505627	10228
Chr7	9599675	9604638	4960
Chr7	10069056	10072485	3432
Chr7	10072485	10088994	16545
Chr7	10214695	10232248	17577
Chr7	10232573	10247699	15085
Chr7	10276049	10278762	2706
Chr7	10637789	10638958	1169
Chr7	13635071	13636590	1518
Chr7	13636586	13642334	5782
Chr7	17830375	17848739	18354
Chr7	17851024	17875763	24739
Chr7	19087596	19090936	3363
Chr7	19583349	19605106	21760
Chr7	20417495	20418851	1354
Chr7	20912482	20917440	4965
Chr7	22987578	22990024	2446
Chr8	641640	646654	5017
Chr8	4904138	4908085	3929
Chr8	4966079	4968088	2009
Chr8	4968094	4975481	7397
Chr8	6735843	6738071	2231
Chr8	6781258	6789052	7801
Chr8	6801374	6806998	5644
Chr8	6806993	6812419	5466
Chr8	6814504	6843639	29210
Chr8	6843615	6845763	2139
Chr8	6855569	6873738	18259
Chr8	6883671	6885814	2141
Chr8	6885809	6896216	10388
Chr8	6899945	6929726	29780
Chr8	6941808	6943761	1962
Chr8	6943754	6948333	4557
Chr8	6945301	6953205	7897
Chr8	6953620	6958787	5174
Chr8	6958779	6963048	4292
Chr8	6963284	6986436	23273
Chr8	7317709	7321070	3362
Chr8	7321069	7324606	3548
Chr8	7336168	7338601	2433
Chr8	11741477	11742808	1325
Chr8	13625852	13629996	4154
Chr8	15041598	15043545	1962
Chr8	17369579	17371628	2048
Chr8	17375050	17380989	5904
Chr8	17382014	17385407	3398
Chr8	17868621	17870664	2034
Chr9	1657195	1659014	1819
Chr9	22395537	22401439	5901

## Sheet: SNP-Genes
Additional file 5 Comparative genomic analysis between KitaakeX and Zhenshan97
Chromosome	Position	Substitution	Effect	Gene ID
Chr1	29143	C>T	Missense	OsKitaake01g000400
Chr1	29475	A>T	Missense	OsKitaake01g000400
Chr1	29562	C>G	Missense	OsKitaake01g000400
Chr1	33435	G>A	Missense	OsKitaake01g000600
Chr1	33444	T>A	Missense	OsKitaake01g000600
Chr1	33980	G>A	Missense	OsKitaake01g000600
Chr1	35963	T>G	Missense	OsKitaake01g000600
Chr1	36541	T>C	Missense	OsKitaake01g000600
Chr1	43259	C>T	Missense	OsKitaake01g000700
Chr1	71735	A>G	Missense	OsKitaake01g000800
Chr1	71763	C>T	Missense	OsKitaake01g000800
Chr1	73992	A>G	Missense	OsKitaake01g000900
Chr1	90366	T>C	Missense	OsKitaake01g001200
Chr1	90775	T>G	Missense	OsKitaake01g001200
Chr1	99356	C>G	Missense	OsKitaake01g001400
Chr1	99399	C>A	Missense	OsKitaake01g001400
Chr1	100826	A>C	Missense	OsKitaake01g001400
Chr1	100952	A>G	Missense	OsKitaake01g001400
Chr1	104914	T>C	Missense	OsKitaake01g001600
Chr1	154157	T>A	Missense	OsKitaake01g001800
Chr1	154514	C>T	Missense	OsKitaake01g001800
Chr1	154809	G>C	Missense	OsKitaake01g001800
Chr1	155091	T>C	Missense	OsKitaake01g001800
Chr1	166080	C>G	Missense	OsKitaake01g002300
Chr1	166239	A>G	Missense	OsKitaake01g002300
Chr1	166313	A>G	Missense	OsKitaake01g002300
Chr1	167028	G>A	Missense	OsKitaake01g002300
Chr1	167466	T>C	Missense	OsKitaake01g002300
Chr1	192588	G>A	Missense	OsKitaake01g002600
Chr1	207749	G>C	Missense	OsKitaake01g002800
Chr1	207940	C>T	Missense	OsKitaake01g002800
Chr1	208021	C>T	Missense	OsKitaake01g002800
Chr1	208515	C>T	Missense	OsKitaake01g002800
Chr1	209071	G>A	Missense	OsKitaake01g002800
Chr1	209151	G>T	Missense	OsKitaake01g002800
Chr1	209843	A>G	Missense	OsKitaake01g002800
Chr1	213374	T>C	Missense	OsKitaake01g002900
Chr1	223325	A>C	Missense	OsKitaake01g003100
Chr1	223411	A>G	Missense	OsKitaake01g003200
Chr1	223427	T>A	Missense	OsKitaake01g003200
Chr1	256186	G>A	Missense	OsKitaake01g003700
Chr1	256579	T>G	Missense	OsKitaake01g003700
Chr1	256580	A>C	Missense	OsKitaake01g003700
Chr1	256796	A>C	Missense	OsKitaake01g003700
Chr1	264764	G>A	Stop gained	OsKitaake01g003800
Chr1	276935	G>A	Missense	OsKitaake01g003900
Chr1	279473	A>C	Missense	OsKitaake01g003900
Chr1	285103	G>C	Missense	OsKitaake01g004000
Chr1	285149	G>C	Missense	OsKitaake01g004000
Chr1	285474	T>C	Missense	OsKitaake01g004000
Chr1	285480	A>C	Missense	OsKitaake01g004000
Chr1	285486	A>T	Missense	OsKitaake01g004000
Chr1	285489	C>A	Missense	OsKitaake01g004000
Chr1	285583	C>T	Missense	OsKitaake01g004000
Chr1	318599	T>A	Missense	OsKitaake01g004300
Chr1	318807	T>C	Missense	OsKitaake01g004300
Chr1	320116	G>C	Missense	OsKitaake01g004300
Chr1	325783	A>G	Missense	OsKitaake01g004500
Chr1	338192	C>A	Missense	OsKitaake01g004800
Chr1	347265	T>C	Missense	OsKitaake01g005100
Chr1	363793	G>A	Missense	OsKitaake01g005200
Chr1	368050	A>G	Missense	OsKitaake01g005200
Chr1	370990	T>C	Missense	OsKitaake01g005200
Chr1	391109	C>T	Missense	OsKitaake01g005400
Chr1	398428	C>T	Missense	OsKitaake01g005500
Chr1	400347	T>C	Missense	OsKitaake01g005500
Chr1	405069	G>C	Missense	OsKitaake01g005600
Chr1	405310	T>C	Missense	OsKitaake01g005600
Chr1	427557	C>G	Missense	OsKitaake01g006000
Chr1	428131	C>A	Missense	OsKitaake01g006000
Chr1	428257	T>A	Missense	OsKitaake01g006000
Chr1	428414	A>G	Missense	OsKitaake01g006000
Chr1	429309	A>G	Missense	OsKitaake01g006000
Chr1	429537	T>A	Missense	OsKitaake01g006000
Chr1	429834	A>G	Missense	OsKitaake01g006000
Chr1	429975	C>T	Missense	OsKitaake01g006000
Chr1	430006	C>T	Missense	OsKitaake01g006000
Chr1	430045	C>A	Missense	OsKitaake01g006000
Chr1	430191	A>T	Missense	OsKitaake01g006000
Chr1	433537	G>T	Missense	OsKitaake01g006100
Chr1	437814	C>A	Missense	OsKitaake01g006200
Chr1	437892	C>T	Missense	OsKitaake01g006200
Chr1	438325	T>G	Missense	OsKitaake01g006200
Chr1	438826	C>A	Missense	OsKitaake01g006200
Chr1	440145	G>A	Missense	OsKitaake01g006200
Chr1	440154	C>T	Missense	OsKitaake01g006200
Chr1	440385	G>A	Missense	OsKitaake01g006200
Chr1	441232	T>G	Missense	OsKitaake01g006200
Chr1	441308	A>G	Missense	OsKitaake01g006200
Chr1	441401	T>C	Missense	OsKitaake01g006200
Chr1	451562	T>C	Splice acceptor	OsKitaake01g006300
Chr1	452358	A>C	Missense	OsKitaake01g006400
Chr1	452411	G>C	Missense	OsKitaake01g006400
Chr1	452453	T>C	Missense	OsKitaake01g006400
Chr1	452475	C>A	Missense	OsKitaake01g006400
Chr1	452478	G>T	Missense	OsKitaake01g006400
Chr1	453968	G>C	Missense	OsKitaake01g006400
Chr1	456089	A>G	Missense	OsKitaake01g006500
Chr1	456125	G>A	Missense	OsKitaake01g006500
Chr1	456322	G>A	Missense	OsKitaake01g006500
Chr1	456378	A>G	Missense	OsKitaake01g006500
Chr1	457809	T>A	Missense	OsKitaake01g006500
Chr1	470589	A>T	Missense	OsKitaake01g006600
Chr1	470603	T>A	Missense	OsKitaake01g006600
Chr1	471374	C>G	Missense	OsKitaake01g006600
Chr1	471379	T>A	Missense	OsKitaake01g006600
Chr1	471382	A>G	Missense	OsKitaake01g006600
Chr1	471515	G>T	Missense	OsKitaake01g006600
Chr1	472030	T>C	Missense	OsKitaake01g006600
Chr1	512399	G>C	Missense	OsKitaake01g115700
Chr1	527091	C>T	Missense	OsKitaake01g115600
Chr1	527106	T>A	Missense	OsKitaake01g115600
Chr1	532561	T>A	Missense	OsKitaake01g115600
Chr1	533879	A>C	Missense	OsKitaake01g115600
Chr1	537905	T>G	Missense	OsKitaake01g115500
Chr1	537923	C>A	Missense	OsKitaake01g115500
Chr1	537973	C>G	Missense	OsKitaake01g115500
Chr1	538076	G>A	Missense	OsKitaake01g115500
Chr1	538353	C>A	Missense	OsKitaake01g115500
Chr1	539274	T>G	Missense	OsKitaake01g115400
Chr1	541728	C>T	Missense	OsKitaake01g115300
Chr1	544695	A>G	Missense	OsKitaake01g115200
Chr1	545405	C>T	Missense	OsKitaake01g115200
Chr1	545633	C>T	Missense	OsKitaake01g115200
Chr1	557194	G>A	Missense	OsKitaake01g115108
Chr1	557212	A>G	Missense	OsKitaake01g115108
Chr1	557222	G>A	Missense	OsKitaake01g115108
Chr1	557233	A>G	Missense	OsKitaake01g115108
Chr1	557771	A>C	Missense	OsKitaake01g114900
Chr1	566568	C>A	Missense	OsKitaake01g114700
Chr1	570117	A>T	Missense	OsKitaake01g114700
Chr1	578580	A>G	Missense	OsKitaake01g114500
Chr1	584226	C>T	Missense	OsKitaake01g114400
Chr1	590874	T>C	Missense	OsKitaake01g114300
Chr1	598789	G>A	Stop gained	OsKitaake01g114300
Chr1	606225	C>T	Missense	OsKitaake01g114200
Chr1	606885	C>T	Splice donor	OsKitaake01g114200
Chr1	614369	C>A	Missense	OsKitaake01g114100
Chr1	614505	C>A	Missense	OsKitaake01g114100
Chr1	614677	T>C	Missense	OsKitaake01g114100
Chr1	618708	T>C	Missense	OsKitaake01g113900
Chr1	618747	C>T	Missense	OsKitaake01g113900
Chr1	624759	A>G	Missense	OsKitaake01g113800
Chr1	628763	T>A	Missense	OsKitaake01g113700
Chr1	633532	T>C	Missense	OsKitaake01g113600
Chr1	649272	T>C	Missense	OsKitaake01g113400
Chr1	669783	A>C	Missense	OsKitaake01g112900
Chr1	671216	C>T	Missense	OsKitaake01g112900
Chr1	674060	C>G	Missense	OsKitaake01g112800
Chr1	718369	C>A	Missense	OsKitaake01g006800
Chr1	718538	G>T	Missense	OsKitaake01g006800
Chr1	748534	A>T	Missense	OsKitaake01g007300
Chr1	748767	T>C	Missense	OsKitaake01g007300
Chr1	748823	A>C	Missense	OsKitaake01g007300
Chr1	748827	A>C	Missense	OsKitaake01g007300
Chr1	749457	C>A	Missense	OsKitaake01g007300
Chr1	752983	C>A	Missense	OsKitaake01g007400
Chr1	753223	T>C	Missense	OsKitaake01g007400
Chr1	754153	G>C	Missense	OsKitaake01g007500
Chr1	754258	G>A	Missense	OsKitaake01g007500
Chr1	754378	A>C	Missense	OsKitaake01g007500
Chr1	754687	G>A	Missense	OsKitaake01g007500
Chr1	754759	C>T	Missense	OsKitaake01g007500
Chr1	754928	A>C	Missense	OsKitaake01g007500
Chr1	755590	G>A	Missense	OsKitaake01g007500
Chr1	755931	C>A	Missense	OsKitaake01g007500
Chr1	756018	A>G	Missense	OsKitaake01g007500
Chr1	756210	A>C	Missense	OsKitaake01g007500
Chr1	760256	G>A	Missense	OsKitaake01g007600
Chr1	760394	A>G	Missense	OsKitaake01g007600
Chr1	760403	A>G	Missense	OsKitaake01g007600
Chr1	760436	A>G	Missense	OsKitaake01g007600
Chr1	760607	C>T	Missense	OsKitaake01g007600
Chr1	760615	T>G	Missense	OsKitaake01g007600
Chr1	760651	T>C	Missense	OsKitaake01g007600
Chr1	761081	T>A	Missense	OsKitaake01g007600
Chr1	761095	T>C	Missense	OsKitaake01g007600
Chr1	761152	G>A	Missense	OsKitaake01g007600
Chr1	764724	T>C	Missense	OsKitaake01g007800
Chr1	764734	A>G	Missense	OsKitaake01g007800
Chr1	764944	A>G	Missense	OsKitaake01g007800
Chr1	764952	C>G	Missense	OsKitaake01g007800
Chr1	764977	C>T	Missense	OsKitaake01g007800
Chr1	764992	A>G	Missense	OsKitaake01g007800
Chr1	764999	T>G	Missense	OsKitaake01g007800
Chr1	765023	G>C	Missense	OsKitaake01g007800
Chr1	765052	T>C	Missense	OsKitaake01g007800
Chr1	765114	G>C	Missense	OsKitaake01g007800
Chr1	765241	C>G	Missense	OsKitaake01g007800
Chr1	765307	C>A	Missense	OsKitaake01g007800
Chr1	765385	C>T	Missense	OsKitaake01g007800
Chr1	766471	T>G	Missense	OsKitaake01g007800
Chr1	766574	T>C	Missense	OsKitaake01g007800
Chr1	766817	A>C	Missense	OsKitaake01g007800
Chr1	767153	G>C	Missense	OsKitaake01g007800
Chr1	767379	C>T	Missense	OsKitaake01g007800
Chr1	778354	G>T	Missense	OsKitaake01g008100
Chr1	798184	G>C	Missense	OsKitaake01g008500
Chr1	798364	C>T	Missense	OsKitaake01g008500
Chr1	798381	A>G	Missense	OsKitaake01g008500
Chr1	798447	C>T	Missense	OsKitaake01g008500
Chr1	798453	T>C	Missense	OsKitaake01g008500
Chr1	798868	G>T	Missense	OsKitaake01g008500
Chr1	798889	C>T	Missense	OsKitaake01g008500
Chr1	798967	C>A	Missense	OsKitaake01g008500
Chr1	798972	T>C	Missense	OsKitaake01g008500
Chr1	799386	G>A	Missense	OsKitaake01g008500
Chr1	799464	G>A	Missense	OsKitaake01g008500
Chr1	801239	G>A	Missense	OsKitaake01g008600
Chr1	801498	T>C	Missense	OsKitaake01g008600
Chr1	801510	C>T	Missense	OsKitaake01g008600
Chr1	801517	G>C	Missense	OsKitaake01g008600
Chr1	801521	C>T	Missense	OsKitaake01g008600
Chr1	801524	G>A	Missense	OsKitaake01g008600
Chr1	801555	A>G	Missense	OsKitaake01g008600
Chr1	801567	C>T	Missense	OsKitaake01g008600
Chr1	801569	G>A	Missense	OsKitaake01g008600
Chr1	801573	T>C	Missense	OsKitaake01g008600
Chr1	801581	G>C	Missense	OsKitaake01g008600
Chr1	801623	G>A	Missense	OsKitaake01g008600
Chr1	801648	C>T	Missense	OsKitaake01g008600
Chr1	801716	C>T	Missense	OsKitaake01g008600
Chr1	805600	G>A	Missense	OsKitaake01g008700
Chr1	805606	A>G	Missense	OsKitaake01g008700
Chr1	805621	G>A	Missense	OsKitaake01g008700
Chr1	805659	C>T	Missense	OsKitaake01g008700
Chr1	806039	A>G	Missense	OsKitaake01g008700
Chr1	812380	C>G	Missense	OsKitaake01g008900
Chr1	814902	G>A	Missense	OsKitaake01g008900
Chr1	818048	T>C	Missense	OsKitaake01g008908
Chr1	819207	C>G	Missense	OsKitaake01g008916
Chr1	820942	C>T	Missense	OsKitaake01g009100
Chr1	821235	T>C	Missense	OsKitaake01g009100
Chr1	822259	G>A	Missense	OsKitaake01g009100
Chr1	825248	G>A	Missense	OsKitaake01g009108
Chr1	825434	C>A	Missense	OsKitaake01g009108
Chr1	870962	A>G	Missense	OsKitaake01g009500
Chr1	871593	C>T	Missense	OsKitaake01g009500
Chr1	872765	C>T	Missense	OsKitaake01g009500
Chr1	872869	C>G	Missense	OsKitaake01g009500
Chr1	874310	C>G	Missense	OsKitaake01g009600
Chr1	874313	A>C	Missense	OsKitaake01g009600
Chr1	874341	C>A	Missense	OsKitaake01g009600
Chr1	874343	T>G	Missense	OsKitaake01g009600
Chr1	874344	C>T	Missense	OsKitaake01g009600
Chr1	874349	A>G	Missense	OsKitaake01g009600
Chr1	874376	A>G	Missense	OsKitaake01g009600
Chr1	874393	C>G	Missense	OsKitaake01g009600
Chr1	874451	C>T	Missense	OsKitaake01g009600
Chr1	874599	A>C	Missense	OsKitaake01g009600
Chr1	874611	A>G	Missense	OsKitaake01g009600
Chr1	874944	T>C	Missense	OsKitaake01g009600
Chr1	874980	G>A	Missense	OsKitaake01g009600
Chr1	874988	T>G	Missense	OsKitaake01g009600
Chr1	875043	G>A	Missense	OsKitaake01g009600
Chr1	876704	C>T	Missense	OsKitaake01g009600
Chr1	877113	C>T	Missense	OsKitaake01g009600
Chr1	877328	A>G	Missense	OsKitaake01g009600
Chr1	877412	A>G	Missense	OsKitaake01g009600
Chr1	877445	C>T	Stop gained	OsKitaake01g009600
Chr1	877745	G>A	Missense	OsKitaake01g009600
Chr1	877810	A>T	Missense	OsKitaake01g009600
Chr1	877902	C>G	Missense	OsKitaake01g009600
Chr1	877957	A>T	Missense	OsKitaake01g009600
Chr1	883078	A>G	Missense	OsKitaake01g009800
Chr1	883101	C>A	Missense	OsKitaake01g009800
Chr1	883191	C>T	Missense	OsKitaake01g009800
Chr1	883212	A>G	Missense	OsKitaake01g009800
Chr1	883281	C>T	Missense	OsKitaake01g009800
Chr1	883846	C>T	Missense	OsKitaake01g009800
Chr1	883974	G>A	Missense	OsKitaake01g009800
Chr1	884071	T>C	Missense	OsKitaake01g009800
Chr1	884356	T>A	Missense	OsKitaake01g009800
Chr1	884367	T>A	Missense	OsKitaake01g009800
Chr1	884368	A>C	Missense	OsKitaake01g009800
Chr1	884371	C>T	Missense	OsKitaake01g009800
Chr1	884377	A>T	Missense	OsKitaake01g009800
Chr1	884382	A>G	Missense	OsKitaake01g009800
Chr1	884391	T>A	Missense	OsKitaake01g009800
Chr1	884392	G>A	Missense	OsKitaake01g009800
Chr1	884404	T>G	Missense	OsKitaake01g009800
Chr1	884410	T>A	Missense	OsKitaake01g009800
Chr1	884424	T>C	Missense	OsKitaake01g009800
Chr1	884436	G>A	Missense	OsKitaake01g009800
Chr1	884466	T>A	Missense	OsKitaake01g009800
Chr1	884470	G>C	Missense	OsKitaake01g009800
Chr1	884716	A>G	Missense	OsKitaake01g009800
Chr1	884772	G>C	Missense	OsKitaake01g009800
Chr1	884782	C>A	Missense	OsKitaake01g009800
Chr1	884848	T>C	Missense	OsKitaake01g009800
Chr1	884882	A>T	Missense	OsKitaake01g009800
Chr1	884899	C>G	Missense	OsKitaake01g009800
Chr1	884915	T>C	Missense	OsKitaake01g009800
Chr1	884971	T>C	Missense	OsKitaake01g009800
Chr1	884992	C>T	Missense	OsKitaake01g009800
Chr1	885038	T>C	Missense	OsKitaake01g009800
Chr1	885045	A>C	Missense	OsKitaake01g009800
Chr1	885166	C>T	Missense	OsKitaake01g009800
Chr1	885200	T>C	Missense	OsKitaake01g009800
Chr1	885238	A>G	Missense	OsKitaake01g009800
Chr1	885254	T>A	Missense	OsKitaake01g009800
Chr1	889255	G>A	Missense	OsKitaake01g010000
Chr1	889304	C>G	Missense	OsKitaake01g010000
Chr1	889494	C>A	Missense	OsKitaake01g010000
Chr1	889523	C>A	Missense	OsKitaake01g010000
Chr1	889797	C>G	Missense	OsKitaake01g010000
Chr1	889798	T>A	Missense	OsKitaake01g010000
Chr1	890267	A>T	Missense	OsKitaake01g010000
Chr1	890288	G>A	Missense	OsKitaake01g010000
Chr1	890354	C>T	Missense	OsKitaake01g010000
Chr1	890587	A>T	Stop gained	OsKitaake01g010000
Chr1	890594	C>T	Missense	OsKitaake01g010000
Chr1	890595	G>A	Missense	OsKitaake01g010000
Chr1	890612	C>T	Missense	OsKitaake01g010000
Chr1	890651	G>A	Missense	OsKitaake01g010000
Chr1	890652	C>T	Missense	OsKitaake01g010000
Chr1	890693	C>T	Missense	OsKitaake01g010000
Chr1	890744	G>A	Missense	OsKitaake01g010000
Chr1	890745	A>G	Missense	OsKitaake01g010000
Chr1	890748	C>T	Missense	OsKitaake01g010000
Chr1	899112	C>A	Missense	OsKitaake01g010300
Chr1	899538	G>A	Missense	OsKitaake01g010300
Chr1	899574	A>G	Missense	OsKitaake01g010300
Chr1	903201	C>A	Stop gained	OsKitaake01g010400
Chr1	903872	G>A	Missense	OsKitaake01g010400
Chr1	904076	A>G	Missense	OsKitaake01g010400
Chr1	904101	C>T	Missense	OsKitaake01g010400
Chr1	904778	T>C	Missense	OsKitaake01g010400
Chr1	904813	C>A	Missense	OsKitaake01g010400
Chr1	904862	A>G	Missense	OsKitaake01g010400
Chr1	904872	T>G	Missense	OsKitaake01g010400
Chr1	905062	G>T	Missense	OsKitaake01g010400
Chr1	905081	T>C	Missense	OsKitaake01g010400
Chr1	905225	C>T	Missense	OsKitaake01g010400
Chr1	905261	G>A	Missense	OsKitaake01g010400
Chr1	905438	C>T	Missense	OsKitaake01g010400
Chr1	905475	G>A	Missense	OsKitaake01g010400
Chr1	952604	C>T	Missense	OsKitaake01g010700
Chr1	952616	C>T	Missense	OsKitaake01g010700
Chr1	952641	G>C	Missense	OsKitaake01g010700
Chr1	952645	A>G	Missense	OsKitaake01g010700
Chr1	952647	A>G	Missense	OsKitaake01g010700
Chr1	952655	T>C	Missense	OsKitaake01g010700
Chr1	952663	A>C	Missense	OsKitaake01g010700
Chr1	952754	A>G	Missense	OsKitaake01g010700
Chr1	952765	G>A	Missense	OsKitaake01g010700
Chr1	952798	T>A	Missense	OsKitaake01g010700
Chr1	952870	A>C	Missense	OsKitaake01g010700
Chr1	952879	A>T	Missense	OsKitaake01g010700
Chr1	952890	T>G	Missense	OsKitaake01g010700
Chr1	952940	T>C	Missense	OsKitaake01g010700
Chr1	952941	A>G	Missense	OsKitaake01g010700
Chr1	952945	A>G	Missense	OsKitaake01g010700
Chr1	952952	G>A	Missense	OsKitaake01g010700
Chr1	952974	T>A	Missense	OsKitaake01g010700
Chr1	952985	A>G	Missense	OsKitaake01g010700
Chr1	952987	A>G	Missense	OsKitaake01g010700
Chr1	953041	C>T	Missense	OsKitaake01g010700
Chr1	953042	A>G	Missense	OsKitaake01g010700
Chr1	953045	A>G	Missense	OsKitaake01g010700
Chr1	953074	G>C	Missense	OsKitaake01g010700
Chr1	953368	G>A	Missense	OsKitaake01g010700
Chr1	953413	C>G	Missense	OsKitaake01g010700
Chr1	953438	C>T	Missense	OsKitaake01g010700
Chr1	953454	G>T	Missense	OsKitaake01g010700
Chr1	953488	A>G	Missense	OsKitaake01g010700
Chr1	953544	G>T	Missense	OsKitaake01g010700
Chr1	953626	G>C	Missense	OsKitaake01g010700
Chr1	955283	T>C	Missense	OsKitaake01g010800
Chr1	956029	T>C	Missense	OsKitaake01g010800
Chr1	956228	T>A	Missense	OsKitaake01g010800
Chr1	956548	T>A	Missense	OsKitaake01g010800
Chr1	957565	C>T	Missense	OsKitaake01g010800
Chr1	962791	A>C	Missense	OsKitaake01g010908
Chr1	964117	G>C	Missense	OsKitaake01g011100
Chr1	964168	C>A	Missense	OsKitaake01g011100
Chr1	965089	A>C	Missense	OsKitaake01g011100
Chr1	965861	A>C	Missense	OsKitaake01g011100
Chr1	966452	C>A	Missense	OsKitaake01g011100
Chr1	967152	T>A	Missense	OsKitaake01g011100
Chr1	968315	C>T	Missense	OsKitaake01g011100
Chr1	968361	T>C	Missense	OsKitaake01g011100
Chr1	970872	A>G	Missense	OsKitaake01g011200
Chr1	971009	A>G	Missense	OsKitaake01g011200
Chr1	972026	C>G	Missense	OsKitaake01g011200
Chr1	972153	C>T	Missense	OsKitaake01g011200
Chr1	972174	C>A	Missense	OsKitaake01g011200
Chr1	972353	C>T	Missense	OsKitaake01g011200
Chr1	972929	G>A	Missense	OsKitaake01g011300
Chr1	973064	C>G	Missense	OsKitaake01g011300
Chr1	973085	A>G	Missense	OsKitaake01g011300
Chr1	973157	G>T	Missense	OsKitaake01g011300
Chr1	973176	G>T	Missense	OsKitaake01g011300
Chr1	973181	A>G	Missense	OsKitaake01g011300
Chr1	973202	A>G	Missense	OsKitaake01g011300
Chr1	973208	G>A	Missense	OsKitaake01g011300
Chr1	973305	T>C	Missense	OsKitaake01g011300
Chr1	989612	A>G	Splice acceptor	OsKitaake01g011300
Chr1	989763	G>C	Missense	OsKitaake01g011300
Chr1	989844	C>T	Missense	OsKitaake01g011300
Chr1	989847	A>G	Missense	OsKitaake01g011300
Chr1	989972	A>G	Missense	OsKitaake01g011300
Chr1	990043	G>A	Missense	OsKitaake01g011300
Chr1	990369	C>A	Missense	OsKitaake01g011300
Chr1	990410	T>G	Missense	OsKitaake01g011300
Chr1	990436	G>A	Missense	OsKitaake01g011300
Chr1	990445	A>C	Missense	OsKitaake01g011300
Chr1	990478	A>C	Missense	OsKitaake01g011300
Chr1	995695	C>G	Missense	OsKitaake01g011500
Chr1	995707	C>G	Missense	OsKitaake01g011500
Chr1	995718	G>C	Missense	OsKitaake01g011500
Chr1	995806	G>A	Missense	OsKitaake01g011500
Chr1	995908	T>G	Missense	OsKitaake01g011500
Chr1	996059	G>A	Missense	OsKitaake01g011500
Chr1	996099	C>G	Missense	OsKitaake01g011500
Chr1	996100	A>G	Missense	OsKitaake01g011500
Chr1	996101	C>G	Missense	OsKitaake01g011500
Chr1	996103	G>C	Missense	OsKitaake01g011500
Chr1	996193	A>C	Missense	OsKitaake01g011500
Chr1	996275	G>A	Missense	OsKitaake01g011500
Chr1	996379	A>C	Missense	OsKitaake01g011500
Chr1	996493	A>G	Missense	OsKitaake01g011500
Chr1	996502	G>T	Missense	OsKitaake01g011500
Chr1	996506	G>T	Missense	OsKitaake01g011500
Chr1	996575	G>A	Missense	OsKitaake01g011500
Chr1	998107	A>G	Missense	OsKitaake01g011500
Chr1	998117	T>C	Missense	OsKitaake01g011500
Chr1	998120	T>C	Missense	OsKitaake01g011500
Chr1	998123	T>C	Missense	OsKitaake01g011500
Chr1	998153	C>A	Missense	OsKitaake01g011500
Chr1	998259	C>G	Missense	OsKitaake01g011500
Chr1	998275	G>C	Missense	OsKitaake01g011500
Chr1	998336	T>C	Missense	OsKitaake01g011500
Chr1	998359	A>G	Missense	OsKitaake01g011500
Chr1	998447	T>C	Missense	OsKitaake01g011500
Chr1	998448	A>C	Missense	OsKitaake01g011500
Chr1	998527	G>A	Missense	OsKitaake01g011500
Chr1	998542	G>C	Missense	OsKitaake01g011500
Chr1	998650	C>A	Missense	OsKitaake01g011500
Chr1	998791	C>T	Missense	OsKitaake01g011500
Chr1	998818	T>C	Missense	OsKitaake01g011500
Chr1	998867	G>A	Missense	OsKitaake01g011500
Chr1	998884	A>C	Missense	OsKitaake01g011500
Chr1	998902	A>G	Missense	OsKitaake01g011500
Chr1	998903	T>A	Missense	OsKitaake01g011500
Chr1	998941	G>A	Missense	OsKitaake01g011500
Chr1	998977	G>C	Missense	OsKitaake01g011500
Chr1	998996	C>T	Missense	OsKitaake01g011500
Chr1	999045	T>A	Missense	OsKitaake01g011500
Chr1	999106	G>A	Missense	OsKitaake01g011500
Chr1	999119	A>C	Missense	OsKitaake01g011500
Chr1	999133	G>A	Missense	OsKitaake01g011500
Chr1	999146	C>A	Missense	OsKitaake01g011500
Chr1	1036482	C>T	Missense	OsKitaake01g012300
Chr1	1036630	G>T	Missense	OsKitaake01g012300
Chr1	1036894	C>T	Missense	OsKitaake01g012300
Chr1	1036912	T>G	Missense	OsKitaake01g012300
Chr1	1036940	A>C	Missense	OsKitaake01g012300
Chr1	1037050	T>C	Missense	OsKitaake01g012300
Chr1	1037065	T>C	Missense	OsKitaake01g012300
Chr1	1037106	T>C	Missense	OsKitaake01g012300
Chr1	1037143	C>A	Missense	OsKitaake01g012300
Chr1	1037146	T>C	Missense	OsKitaake01g012300
Chr1	1037183	C>G	Missense	OsKitaake01g012300
Chr1	1037188	G>A	Missense	OsKitaake01g012300
Chr1	1038478	T>C	Missense	OsKitaake01g012300
Chr1	1038486	A>T	Missense	OsKitaake01g012300
Chr1	1038574	G>A	Missense	OsKitaake01g012300
Chr1	1038601	G>T	Missense	OsKitaake01g012300
Chr1	1038661	T>C	Missense	OsKitaake01g012300
Chr1	1038773	A>G	Missense	OsKitaake01g012300
Chr1	1038865	C>T	Missense	OsKitaake01g012300
Chr1	1039106	T>G	Missense	OsKitaake01g012300
Chr1	1040450	C>T	Missense	OsKitaake01g012300
Chr1	1044511	T>C	Missense	OsKitaake01g012400
Chr1	1052642	G>C	Missense	OsKitaake01g012500
Chr1	1092535	A>G	Missense	OsKitaake01g012800
Chr1	1093732	C>T	Missense	OsKitaake01g012800
Chr1	1094038	G>C	Missense	OsKitaake01g012800
Chr1	1101172	G>A	Missense	OsKitaake01g012900
Chr1	1102215	A>G	Missense	OsKitaake01g012900
Chr1	1107249	T>C	Missense	OsKitaake01g013000
Chr1	1107417	G>A	Missense	OsKitaake01g013000
Chr1	1115780	A>T	Missense	OsKitaake01g013100
Chr1	1126557	T>C	Missense	OsKitaake01g013200
Chr1	1126559	G>A	Missense	OsKitaake01g013200
Chr1	1126758	A>C	Missense	OsKitaake01g013200
Chr1	1126890	T>C	Missense	OsKitaake01g013200
Chr1	1126900	C>T	Missense	OsKitaake01g013200
Chr1	1126906	A>C	Missense	OsKitaake01g013200
Chr1	1126908	G>A	Missense	OsKitaake01g013200
Chr1	1131954	C>T	Missense	OsKitaake01g013300
Chr1	1132556	G>A	Missense	OsKitaake01g013300
Chr1	1132559	A>C	Missense	OsKitaake01g013300
Chr1	1132564	G>A	Missense	OsKitaake01g013300
Chr1	1132585	G>T	Missense	OsKitaake01g013300
Chr1	1132607	A>C	Missense	OsKitaake01g013300
Chr1	1138354	T>A	Missense	OsKitaake01g013400
Chr1	1139098	G>A	Missense	OsKitaake01g013400
Chr1	1139410	G>A	Missense	OsKitaake01g013400
Chr1	1139536	G>T	Missense	OsKitaake01g013400
Chr1	1158298	C>G	Missense	OsKitaake01g013500
Chr1	1158797	A>C	Missense	OsKitaake01g013500
Chr1	1160226	C>A	Missense	OsKitaake01g013600
Chr1	1160473	T>C	Missense	OsKitaake01g013600
Chr1	1381334	A>C	Missense	OsKitaake01g016600
Chr1	1391817	G>C	Missense	OsKitaake01g016800
Chr1	1421140	A>T	Missense	OsKitaake01g017300
Chr1	1421150	G>A	Missense	OsKitaake01g017300
Chr1	1421204	T>C	Missense	OsKitaake01g017300
Chr1	1427978	A>C	Missense	OsKitaake01g017600
Chr1	1427989	T>G	Missense	OsKitaake01g017600
Chr1	1428235	C>G	Missense	OsKitaake01g017600
Chr1	1428341	G>T	Missense	OsKitaake01g017600
Chr1	1431989	A>G	Missense	OsKitaake01g017700
Chr1	1431990	C>G	Missense	OsKitaake01g017700
Chr1	1432031	G>C	Missense	OsKitaake01g017700
Chr1	1432032	C>T	Missense	OsKitaake01g017700
Chr1	1432059	A>G	Missense	OsKitaake01g017700
Chr1	1432313	G>C	Missense	OsKitaake01g017700
Chr1	1432331	A>G	Missense	OsKitaake01g017700
Chr1	1432353	A>G	Missense	OsKitaake01g017700
Chr1	1432354	T>G	Missense	OsKitaake01g017700
Chr1	1432374	C>A	Missense	OsKitaake01g017700
Chr1	1432487	G>C	Missense	OsKitaake01g017700
Chr1	1432655	G>A	Missense	OsKitaake01g017700
Chr1	1432681	A>T	Missense	OsKitaake01g017700
Chr1	1432688	C>G	Missense	OsKitaake01g017700
Chr1	1432689	C>A	Missense	OsKitaake01g017700
Chr1	1432698	A>G	Missense	OsKitaake01g017700
Chr1	1432706	C>T	Missense	OsKitaake01g017700
Chr1	1432760	C>A	Missense	OsKitaake01g017700
Chr1	1432769	A>G	Missense	OsKitaake01g017700
Chr1	1442431	A>G	Missense	OsKitaake01g017900
Chr1	1442596	G>A	Missense	OsKitaake01g017900
Chr1	1459718	A>G	Missense	OsKitaake01g018200
Chr1	1460885	T>C	Missense	OsKitaake01g018200
Chr1	1471390	C>G	Missense	OsKitaake01g018300
Chr1	1471809	G>A	Missense	OsKitaake01g018300
Chr1	1479895	G>C	Missense	OsKitaake01g018500
Chr1	1546648	C>G	Missense	OsKitaake01g018700
Chr1	1547066	C>A	Missense	OsKitaake01g018700
Chr1	1547092	G>C	Missense	OsKitaake01g018700
Chr1	1547100	G>C	Missense	OsKitaake01g018700
Chr1	1547278	T>A	Missense	OsKitaake01g018700
Chr1	1547279	T>A	Stop gained	OsKitaake01g018700
Chr1	1547389	G>A	Missense	OsKitaake01g018700
Chr1	1547392	G>A	Missense	OsKitaake01g018700
Chr1	1547393	T>C	Missense	OsKitaake01g018700
Chr1	1547404	A>T	Missense	OsKitaake01g018700
Chr1	1547413	G>T	Missense	OsKitaake01g018700
Chr1	1547435	G>C	Missense	OsKitaake01g018700
Chr1	1547483	A>T	Missense	OsKitaake01g018700
Chr1	1547484	G>C	Missense	OsKitaake01g018700
Chr1	1547485	T>G	Missense	OsKitaake01g018700
Chr1	1547492	T>C	Missense	OsKitaake01g018700
Chr1	1547848	G>A	Missense	OsKitaake01g018700
Chr1	1547849	T>C	Missense	OsKitaake01g018700
Chr1	1547852	A>T	Missense	OsKitaake01g018700
Chr1	1547855	T>C	Missense	OsKitaake01g018700
Chr1	1547860	T>A	Missense	OsKitaake01g018700
Chr1	1547876	C>T	Missense	OsKitaake01g018700
Chr1	1547885	G>T	Missense	OsKitaake01g018700
Chr1	1548211	A>G	Missense	OsKitaake01g018700
Chr1	1548212	C>T	Missense	OsKitaake01g018700
Chr1	1548214	T>G	Missense	OsKitaake01g018700
Chr1	1548215	C>G	Missense	OsKitaake01g018700
Chr1	1548218	T>C	Missense	OsKitaake01g018700
Chr1	1548219	T>G	Missense	OsKitaake01g018700
Chr1	1548220	T>G	Missense	OsKitaake01g018700
Chr1	1548716	C>G	Missense	OsKitaake01g018700
Chr1	1548814	G>C	Missense	OsKitaake01g018700
Chr1	1548965	C>T	Missense	OsKitaake01g018700
Chr1	1556175	A>G	Missense	OsKitaake01g018800
Chr1	1561968	T>C	Missense	OsKitaake01g018900
Chr1	1562028	G>A	Missense	OsKitaake01g018900
Chr1	1562130	C>T	Missense	OsKitaake01g018900
Chr1	1563862	T>C	Missense	OsKitaake01g018900
Chr1	1563911	C>A	Missense	OsKitaake01g018900
Chr1	1564098	A>G	Missense	OsKitaake01g018900
Chr1	1564231	A>G	Missense	OsKitaake01g018900
Chr1	1564431	A>G	Missense	OsKitaake01g018900
Chr1	1566768	G>T	Missense	OsKitaake01g019000
Chr1	1570280	G>A	Missense	OsKitaake01g019200
Chr1	1570462	A>G	Missense	OsKitaake01g019200
Chr1	1570561	G>A	Missense	OsKitaake01g019200
Chr1	1570568	A>G	Missense	OsKitaake01g019200
Chr1	1572291	A>C	Missense	OsKitaake01g019300
Chr1	1572466	T>C	Missense	OsKitaake01g019300
Chr1	1575165	A>T	Missense	OsKitaake01g019400
Chr1	1575173	C>G	Missense	OsKitaake01g019400
Chr1	1575177	G>A	Missense	OsKitaake01g019400
Chr1	1575180	T>G	Missense	OsKitaake01g019400
Chr1	1575214	A>G	Missense	OsKitaake01g019400
Chr1	1575298	A>G	Missense	OsKitaake01g019400
Chr1	1575943	G>C	Missense	OsKitaake01g019400
Chr1	1578061	T>C	Missense	OsKitaake01g019400
Chr1	1594396	G>A	Missense	OsKitaake01g019500
Chr1	1596205	T>C	Missense	OsKitaake01g019500
Chr1	1607036	C>T	Missense	OsKitaake01g019600
Chr1	1607616	C>T	Missense	OsKitaake01g019600
Chr1	1627139	T>C	Missense	OsKitaake01g019900
Chr1	1790811	T>G	Missense	OsKitaake01g021200
Chr1	1802625	C>T	Missense	OsKitaake01g021400
Chr1	1821890	G>C	Missense	OsKitaake01g021800
Chr1	1822156	T>A	Missense	OsKitaake01g021800
Chr1	1822874	A>C	Missense	OsKitaake01g021800
Chr1	1823099	G>A	Missense	OsKitaake01g021800
Chr1	1823101	G>A	Missense	OsKitaake01g021800
Chr1	1823186	C>T	Missense	OsKitaake01g021800
Chr1	1823459	G>T	Missense	OsKitaake01g021800
Chr1	1823723	C>T	Missense	OsKitaake01g021800
Chr1	1823937	G>C	Missense	OsKitaake01g021800
Chr1	1827645	G>A	Missense	OsKitaake01g021900
Chr1	1832573	A>G	Missense	OsKitaake01g022000
Chr1	1845678	A>G	Missense	OsKitaake01g022200
Chr1	1869984	G>A	Missense	OsKitaake01g022400
Chr1	1890328	C>T	Missense	OsKitaake01g022700
Chr1	1901555	T>G	Missense	OsKitaake01g022900
Chr1	1905801	C>T	Missense	OsKitaake01g023000
Chr1	1906833	A>C	Missense	OsKitaake01g023000
Chr1	1906889	G>A	Missense	OsKitaake01g023000
Chr1	1910348	C>T	Missense	OsKitaake01g023000
Chr1	1913042	A>C	Missense	OsKitaake01g023100
Chr1	1913061	G>C	Missense	OsKitaake01g023100
Chr1	1913995	A>G	Missense	OsKitaake01g023100
Chr1	1920648	A>C	Missense	OsKitaake01g023200
Chr1	1921182	C>G	Missense	OsKitaake01g023200
Chr1	1921256	T>G	Missense	OsKitaake01g023200
Chr1	1921320	G>A	Missense	OsKitaake01g023200
Chr1	1924372	C>T	Missense	OsKitaake01g023300
Chr1	1959402	T>C	Missense	OsKitaake01g023500
Chr1	1962704	A>G	Missense	OsKitaake01g023600
Chr1	1988640	A>G	Missense	OsKitaake01g024000
Chr1	1997276	T>C	Missense	OsKitaake01g024200
Chr1	2013190	G>T	Missense	OsKitaake01g024700
Chr1	2013309	C>G	Missense	OsKitaake01g024700
Chr1	2013310	T>G	Missense	OsKitaake01g024700
Chr1	2013313	T>C	Missense	OsKitaake01g024700
Chr1	2013317	C>A	Missense	OsKitaake01g024700
Chr1	2013320	G>C	Missense	OsKitaake01g024700
Chr1	2013323	G>T	Missense	OsKitaake01g024700
Chr1	2013324	A>C	Missense	OsKitaake01g024700
Chr1	2013326	A>G	Missense	OsKitaake01g024700
Chr1	2013329	A>T	Missense	OsKitaake01g024700
Chr1	2013849	C>T	Missense	OsKitaake01g024800
Chr1	2013971	C>A	Missense	OsKitaake01g024800
Chr1	2015116	T>C	Missense	OsKitaake01g024800
Chr1	2015253	C>T	Missense	OsKitaake01g024800
Chr1	2015261	T>C	Missense	OsKitaake01g024800
Chr1	2016393	G>T	Missense	OsKitaake01g025000
Chr1	2016575	G>T	Missense	OsKitaake01g025000
Chr1	2016640	G>C	Missense	OsKitaake01g025000
Chr1	2016726	C>G	Missense	OsKitaake01g025000
Chr1	2016785	C>T	Missense	OsKitaake01g025000
Chr1	2016793	G>C	Missense	OsKitaake01g025000
Chr1	2018545	T>C	Stop lost	OsKitaake01g024900
Chr1	2018942	T>G	Missense	OsKitaake01g024900
Chr1	2018947	C>T	Missense	OsKitaake01g024900
Chr1	2018956	T>C	Missense	OsKitaake01g024900
Chr1	2018974	T>C	Missense	OsKitaake01g024900
Chr1	2018996	T>G	Missense	OsKitaake01g024900
Chr1	2019094	T>A	Missense	OsKitaake01g024900
Chr1	2019104	G>A	Missense	OsKitaake01g024900
Chr1	2019176	G>T	Missense	OsKitaake01g024900
Chr1	2019181	C>G	Missense	OsKitaake01g024900
Chr1	2019197	C>A	Stop gained	OsKitaake01g024900
Chr1	2019206	C>G	Missense	OsKitaake01g024900
Chr1	2019207	C>A	Missense	OsKitaake01g024900
Chr1	2019220	G>A	Missense	OsKitaake01g024900
Chr1	2019234	C>T	Missense	OsKitaake01g024900
Chr1	2022294	C>G	Missense	OsKitaake01g024800
Chr1	2022297	C>G	Missense	OsKitaake01g024800
Chr1	2022379	T>C	Missense	OsKitaake01g024800
Chr1	2022451	T>G	Missense	OsKitaake01g024800
Chr1	2022464	A>C	Missense	OsKitaake01g024800
Chr1	2022480	A>C	Missense	OsKitaake01g024800
Chr1	2022520	A>G	Missense	OsKitaake01g024800
Chr1	2022594	C>A	Missense	OsKitaake01g024800
Chr1	2022774	T>G	Missense	OsKitaake01g024800
Chr1	2022814	G>T	Missense	OsKitaake01g024800
Chr1	2022850	A>G	Missense	OsKitaake01g024800
Chr1	2022853	T>C	Missense	OsKitaake01g024800
Chr1	2022865	G>C	Missense	OsKitaake01g024800
Chr1	2022927	C>G	Missense	OsKitaake01g024800
Chr1	2024127	C>G	Missense	OsKitaake01g025100
Chr1	2024187	A>C	Missense	OsKitaake01g025100
Chr1	2024197	A>C	Missense	OsKitaake01g025100
Chr1	2024319	G>T	Missense	OsKitaake01g025100
Chr1	2024320	C>T	Missense	OsKitaake01g025100
Chr1	2024469	G>T	Missense	OsKitaake01g025100
Chr1	2024550	A>T	Missense	OsKitaake01g025100
Chr1	2024626	A>C	Missense	OsKitaake01g025100
Chr1	2032003	T>C	Missense	OsKitaake01g025300
Chr1	2032152	C>G	Missense	OsKitaake01g025300
Chr1	2032165	A>C	Missense	OsKitaake01g025300
Chr1	2032768	T>G	Missense	OsKitaake01g025300
Chr1	2032789	C>G	Missense	OsKitaake01g025300
Chr1	2032790	T>A	Missense	OsKitaake01g025300
Chr1	2032800	C>G	Missense	OsKitaake01g025300
Chr1	2032823	A>G	Missense	OsKitaake01g025300
Chr1	2033413	T>A	Missense	OsKitaake01g025400
Chr1	2033536	G>C	Missense	OsKitaake01g025400
Chr1	2033594	C>T	Missense	OsKitaake01g025400
Chr1	2033966	A>C	Missense	OsKitaake01g025400
Chr1	2033983	C>G	Missense	OsKitaake01g025400
Chr1	2034055	G>C	Missense	OsKitaake01g025400
Chr1	2037356	C>T	Missense	OsKitaake01g025400
Chr1	2040055	A>G	Missense	OsKitaake01g025500
Chr1	2040086	A>G	Missense	OsKitaake01g025500
Chr1	2040470	C>A	Missense	OsKitaake01g025500
Chr1	2040619	T>G	Missense	OsKitaake01g025500
Chr1	2040978	G>A	Missense	OsKitaake01g025500
Chr1	2041419	T>C	Missense	OsKitaake01g025500
Chr1	2041467	C>T	Missense	OsKitaake01g025500
Chr1	2041728	G>T	Missense	OsKitaake01g025500
Chr1	2041778	A>C	Missense	OsKitaake01g025500
Chr1	2041779	G>A	Missense	OsKitaake01g025500
Chr1	2041799	T>C	Missense	OsKitaake01g025500
Chr1	2042000	A>G	Missense	OsKitaake01g025500
Chr1	2049255	T>G	Missense	OsKitaake01g025700
Chr1	2049257	T>G	Missense	OsKitaake01g025700
Chr1	2049276	A>C	Missense	OsKitaake01g025700
Chr1	2049498	G>A	Missense	OsKitaake01g025700
Chr1	2049514	G>A	Missense	OsKitaake01g025700
Chr1	2049535	C>T	Missense	OsKitaake01g025700
Chr1	2049549	T>C	Missense	OsKitaake01g025700
Chr1	2049550	C>T	Missense	OsKitaake01g025700
Chr1	2049565	G>C	Missense	OsKitaake01g025700
Chr1	2049568	C>G	Missense	OsKitaake01g025700
Chr1	2049577	C>A	Missense	OsKitaake01g025700
Chr1	2049637	G>A	Missense	OsKitaake01g025700
Chr1	2049643	G>A	Missense	OsKitaake01g025700
Chr1	2049648	G>A	Missense	OsKitaake01g025700
Chr1	2049691	G>T	Missense	OsKitaake01g025700
Chr1	2049736	A>T	Missense	OsKitaake01g025700
Chr1	2049750	C>G	Missense	OsKitaake01g025700
Chr1	2049834	G>A	Missense	OsKitaake01g025700
Chr1	2049924	A>T	Missense	OsKitaake01g025700
Chr1	2051271	A>G	Missense	OsKitaake01g025600
Chr1	2051285	G>T	Missense	OsKitaake01g025600
Chr1	2051693	A>G	Missense	OsKitaake01g025600
Chr1	2051713	T>G	Missense	OsKitaake01g025600
Chr1	2051739	C>G	Missense	OsKitaake01g025600
Chr1	2051887	T>G	Missense	OsKitaake01g025600
Chr1	2051927	G>A	Missense	OsKitaake01g025600
Chr1	2052243	G>C	Missense	OsKitaake01g025600
Chr1	2052258	T>G	Stop gained	OsKitaake01g025600
Chr1	2052282	A>C	Missense	OsKitaake01g025600
Chr1	2052351	A>C	Missense	OsKitaake01g025600
Chr1	2052429	G>A	Missense	OsKitaake01g025600
Chr1	2052467	A>T	Missense	OsKitaake01g025600
Chr1	2054529	T>C	Missense	OsKitaake01g025800
Chr1	2054552	T>G	Missense	OsKitaake01g025800
Chr1	2054586	T>C	Missense	OsKitaake01g025800
Chr1	2054616	A>G	Missense	OsKitaake01g025800
Chr1	2054670	A>T	Missense	OsKitaake01g025800
Chr1	2054694	A>G	Missense	OsKitaake01g025800
Chr1	2055007	G>A	Missense	OsKitaake01g025800
Chr1	2055100	T>C	Missense	OsKitaake01g025800
Chr1	2055187	G>A	Missense	OsKitaake01g025800
Chr1	2055205	C>T	Missense	OsKitaake01g025800
Chr1	2056851	C>G	Missense	OsKitaake01g025800
Chr1	2057553	C>G	Missense	OsKitaake01g025800
Chr1	2057891	A>T	Missense	OsKitaake01g025800
Chr1	2058151	G>A	Missense	OsKitaake01g025800
Chr1	2058703	T>C	Stop lost	OsKitaake01g025800
Chr1	2070593	C>G	Missense	OsKitaake01g025908
Chr1	2070626	T>C	Missense	OsKitaake01g025908
Chr1	2070644	T>C	Missense	OsKitaake01g025908
Chr1	2070648	G>C	Missense	OsKitaake01g025908
Chr1	2070667	C>G	Missense	OsKitaake01g025908
Chr1	2070677	A>G	Missense	OsKitaake01g025908
Chr1	2070705	G>C	Missense	OsKitaake01g025908
Chr1	2070716	G>T	Missense	OsKitaake01g025908
Chr1	2070718	A>G	Missense	OsKitaake01g025908
Chr1	2070720	C>G	Missense	OsKitaake01g025908
Chr1	2070827	C>G	Missense	OsKitaake01g025908
Chr1	2070829	C>T	Missense	OsKitaake01g025908
Chr1	2070833	A>T	Missense	OsKitaake01g025908
Chr1	2070838	T>C	Missense	OsKitaake01g025908
Chr1	2070924	T>C	Start lost	OsKitaake01g026000
Chr1	2071056	T>C	Missense	OsKitaake01g026000
Chr1	2071080	C>T	Missense	OsKitaake01g026000
Chr1	2072958	C>T	Missense	OsKitaake01g026000
Chr1	2073325	A>C	Missense	OsKitaake01g026000
Chr1	2073585	C>T	Missense	OsKitaake01g026000
Chr1	2073675	C>G	Missense	OsKitaake01g026000
Chr1	2092364	C>A	Missense	OsKitaake01g026200
Chr1	2092386	G>A	Missense	OsKitaake01g026200
Chr1	2092388	A>C	Missense	OsKitaake01g026200
Chr1	2092406	C>T	Missense	OsKitaake01g026200
Chr1	2092409	C>T	Missense	OsKitaake01g026200
Chr1	2092437	G>A	Missense	OsKitaake01g026200
Chr1	2092464	A>T	Missense	OsKitaake01g026200
Chr1	2092595	A>C	Missense	OsKitaake01g026200
Chr1	2092736	G>C	Missense	OsKitaake01g026200
Chr1	2092824	G>A	Missense	OsKitaake01g026200
Chr1	2092835	A>G	Missense	OsKitaake01g026200
Chr1	2092838	G>A	Missense	OsKitaake01g026200
Chr1	2092870	T>G	Missense	OsKitaake01g026200
Chr1	2092974	G>A	Missense	OsKitaake01g026200
Chr1	2093051	A>T	Missense	OsKitaake01g026200
Chr1	2093054	T>A	Missense	OsKitaake01g026200
Chr1	2093060	G>A	Missense	OsKitaake01g026200
Chr1	2093138	C>T	Stop gained	OsKitaake01g026200
Chr1	2093139	A>C	Missense	OsKitaake01g026200
Chr1	2093160	A>C	Missense	OsKitaake01g026200
Chr1	2093163	A>G	Missense	OsKitaake01g026200
Chr1	2093222	C>G	Missense	OsKitaake01g026200
Chr1	2093249	G>T	Missense	OsKitaake01g026200
Chr1	2093342	G>A	Missense	OsKitaake01g026200
Chr1	2093480	T>C	Missense	OsKitaake01g026200
Chr1	2093508	A>C	Missense	OsKitaake01g026200
Chr1	2093511	G>A	Missense	OsKitaake01g026200
Chr1	2093514	C>A	Missense	OsKitaake01g026200
Chr1	2093519	G>A	Missense	OsKitaake01g026200
Chr1	2093531	G>T	Missense	OsKitaake01g026200
Chr1	2097847	C>G	Missense	OsKitaake01g026300
Chr1	2097931	A>G	Missense	OsKitaake01g026300
Chr1	2098113	C>A	Missense	OsKitaake01g026300
Chr1	2098280	T>A	Missense	OsKitaake01g026300
Chr1	2104533	G>A	Missense	OsKitaake01g026400
Chr1	2107158	G>A	Missense	OsKitaake01g026400
Chr1	2107942	T>G	Missense	OsKitaake01g026400
Chr1	2107979	G>C	Missense	OsKitaake01g026400
Chr1	2117182	T>C	Missense	OsKitaake01g026600
Chr1	2120225	C>T	Missense	OsKitaake01g026700
Chr1	2131864	T>G	Missense	OsKitaake01g026800
Chr1	2132203	T>G	Missense	OsKitaake01g026800
Chr1	2132204	T>A	Stop gained	OsKitaake01g026800
Chr1	2135411	T>C	Missense	OsKitaake01g026900
Chr1	2135503	T>C	Missense	OsKitaake01g026900
Chr1	2135888	A>G	Missense	OsKitaake01g026900
Chr1	2135982	C>T	Missense	OsKitaake01g026900
Chr1	2139908	C>T	Missense	OsKitaake01g027000
Chr1	2145947	A>C	Missense	OsKitaake01g027100
Chr1	2192451	C>T	Missense	OsKitaake01g027500
Chr1	2255760	C>T	Missense	OsKitaake01g028000
Chr1	2265348	T>C	Missense	OsKitaake01g028100
Chr1	2265362	C>A	Missense	OsKitaake01g028100
Chr1	2265374	A>G	Missense	OsKitaake01g028100
Chr1	2265467	T>C	Missense	OsKitaake01g028100
Chr1	2268654	A>G	Missense	OsKitaake01g028100
Chr1	2285702	C>T	Missense	OsKitaake01g028200
Chr1	2285709	C>T	Missense	OsKitaake01g028200
Chr1	2285740	A>T	Missense	OsKitaake01g028200
Chr1	2289466	C>G	Missense	OsKitaake01g028200
Chr1	2289640	G>A	Missense	OsKitaake01g028200
Chr1	2289777	A>C	Missense	OsKitaake01g028200
Chr1	2289789	T>C	Missense	OsKitaake01g028200
Chr1	2291385	A>G	Missense	OsKitaake01g028300
Chr1	2292444	C>A	Missense	OsKitaake01g028300
Chr1	2294288	A>T	Missense	OsKitaake01g028300
Chr1	2294406	G>A	Missense	OsKitaake01g028300
Chr1	2309723	C>A	Missense	OsKitaake01g028500
Chr1	2310872	T>C	Missense	OsKitaake01g028600
Chr1	2314670	A>T	Missense	OsKitaake01g028700
Chr1	2318118	T>C	Missense	OsKitaake01g028700
Chr1	2401175	T>G	Missense	OsKitaake01g029700
Chr1	2401179	A>G	Missense	OsKitaake01g029700
Chr1	2401415	G>A	Missense	OsKitaake01g029700
Chr1	2401461	A>G	Missense	OsKitaake01g029700
Chr1	2401472	A>G	Missense	OsKitaake01g029700
Chr1	2401484	A>G	Missense	OsKitaake01g029700
Chr1	2401488	G>T	Missense	OsKitaake01g029700
Chr1	2401557	C>T	Missense	OsKitaake01g029700
Chr1	2401586	G>A	Missense	OsKitaake01g029700
Chr1	2401685	G>A	Missense	OsKitaake01g029700
Chr1	2401704	A>G	Missense	OsKitaake01g029700
Chr1	2417478	G>T	Missense	OsKitaake01g030000
Chr1	2417645	C>A	Missense	OsKitaake01g030000
Chr1	2429089	C>T	Missense	OsKitaake01g030400
Chr1	2429829	C>G	Missense	OsKitaake01g030400
Chr1	2443311	C>A	Missense	OsKitaake01g030800
Chr1	2443888	C>T	Missense	OsKitaake01g030800
Chr1	2444083	T>A	Missense	OsKitaake01g030800
Chr1	2446273	G>A	Missense	OsKitaake01g030900
Chr1	2451261	G>T	Missense	OsKitaake01g030900
Chr1	2451461	T>A	Missense	OsKitaake01g030900
Chr1	2451462	T>G	Missense	OsKitaake01g030900
Chr1	2455362	G>C	Missense	OsKitaake01g031000
Chr1	2455568	G>A	Missense	OsKitaake01g031000
Chr1	2456618	T>C	Missense	OsKitaake01g031000
Chr1	2456621	T>C	Missense	OsKitaake01g031000
Chr1	2458712	C>T	Missense	OsKitaake01g031100
Chr1	2458856	G>A	Missense	OsKitaake01g031100
Chr1	2458875	T>C	Missense	OsKitaake01g031100
Chr1	2459866	T>C	Missense	OsKitaake01g031100
Chr1	2459952	A>C	Missense	OsKitaake01g031100
Chr1	2460001	A>G	Missense	OsKitaake01g031100
Chr1	2514420	G>A	Missense	OsKitaake01g031900
Chr1	2514463	T>C	Missense	OsKitaake01g031900
Chr1	2514498	C>G	Missense	OsKitaake01g031900
Chr1	2514609	C>G	Missense	OsKitaake01g031900
Chr1	2514634	G>T	Missense	OsKitaake01g031900
Chr1	2514753	G>T	Missense	OsKitaake01g031900
Chr1	2566632	A>G	Missense	OsKitaake01g032400
Chr1	2566641	A>G	Missense	OsKitaake01g032400
Chr1	2566764	A>G	Missense	OsKitaake01g032400
Chr1	2566784	G>C	Missense	OsKitaake01g032400
Chr1	2568709	T>G	Missense	OsKitaake01g032400
Chr1	2572472	C>T	Missense	OsKitaake01g032500
Chr1	2574172	G>A	Missense	OsKitaake01g032500
Chr1	2575568	G>T	Missense	OsKitaake01g032600
Chr1	2575617	C>T	Missense	OsKitaake01g032600
Chr1	2575620	A>G	Missense	OsKitaake01g032600
Chr1	2575628	T>C	Missense	OsKitaake01g032600
Chr1	2575936	C>T	Missense	OsKitaake01g032600
Chr1	2575946	A>C	Missense	OsKitaake01g032600
Chr1	2575956	C>T	Missense	OsKitaake01g032600
Chr1	2576019	G>A	Missense	OsKitaake01g032600
Chr1	2576201	G>A	Missense	OsKitaake01g032600
Chr1	2576237	G>A	Missense	OsKitaake01g032600
Chr1	2576279	A>G	Missense	OsKitaake01g032600
Chr1	2576280	C>T	Missense	OsKitaake01g032600
Chr1	2576311	A>C	Missense	OsKitaake01g032600
Chr1	2576316	C>T	Missense	OsKitaake01g032600
Chr1	2576320	T>G	Missense	OsKitaake01g032600
Chr1	2576328	T>C	Missense	OsKitaake01g032600
Chr1	2576360	G>A	Missense	OsKitaake01g032600
Chr1	2576364	C>A	Missense	OsKitaake01g032600
Chr1	2576373	C>A	Missense	OsKitaake01g032600
Chr1	2576406	G>T	Missense	OsKitaake01g032600
Chr1	2576424	G>C	Missense	OsKitaake01g032600
Chr1	2576431	C>G	Missense	OsKitaake01g032600
Chr1	2576818	G>A	Splice donor	OsKitaake01g032600
Chr1	2576824	T>C	Missense	OsKitaake01g032600
Chr1	2576828	C>T	Missense	OsKitaake01g032600
Chr1	2576881	T>G	Missense	OsKitaake01g032600
Chr1	2576958	C>A	Missense	OsKitaake01g032600
Chr1	2576995	C>T	Missense	OsKitaake01g032600
Chr1	2576998	C>T	Missense	OsKitaake01g032600
Chr1	2578170	G>A	Missense	OsKitaake01g032700
Chr1	2578993	T>C	Missense	OsKitaake01g032700
Chr1	2579094	C>T	Missense	OsKitaake01g032700
Chr1	2579303	T>A	Stop gained	OsKitaake01g032700
Chr1	2581587	G>C	Missense	OsKitaake01g032800
Chr1	2582761	C>G	Missense	OsKitaake01g032800
Chr1	2582766	T>C	Missense	OsKitaake01g032800
Chr1	2582857	C>A	Missense	OsKitaake01g032800
Chr1	2583018	C>T	Missense	OsKitaake01g032800
Chr1	2583071	G>C	Missense	OsKitaake01g032800
Chr1	2583120	C>A	Missense	OsKitaake01g032800
Chr1	2584013	C>G	Missense	OsKitaake01g032800
Chr1	2586006	C>T	Missense	OsKitaake01g032900
Chr1	2586023	C>T	Missense	OsKitaake01g032900
Chr1	2586065	C>T	Missense	OsKitaake01g032900
Chr1	2594358	A>C	Missense	OsKitaake01g032900
Chr1	2594678	G>A	Missense	OsKitaake01g032900
Chr1	2597243	C>G	Missense	OsKitaake01g033000
Chr1	2597442	A>C	Missense	OsKitaake01g033000
Chr1	2599420	G>A	Missense	OsKitaake01g033000
Chr1	2600959	A>T	Splice donor	OsKitaake01g033100
Chr1	2603170	C>A	Missense	OsKitaake01g033200
Chr1	2618722	C>T	Missense	OsKitaake01g033300
Chr1	2621742	T>A	Missense	OsKitaake01g033300
Chr1	2645727	A>C	Missense	OsKitaake01g033400
Chr1	2645929	C>T	Missense	OsKitaake01g033400
Chr1	2646148	T>A	Missense	OsKitaake01g033400
Chr1	2646481	C>T	Missense	OsKitaake01g033400
Chr1	2654968	G>A	Missense	OsKitaake01g033408
Chr1	2655876	T>C	Missense	OsKitaake01g033408
Chr1	2655918	G>A	Stop gained	OsKitaake01g033408
Chr1	2655983	G>A	Missense	OsKitaake01g033408
Chr1	2656004	C>T	Missense	OsKitaake01g033408
Chr1	2656023	C>T	Missense	OsKitaake01g033408
Chr1	2656091	A>G	Missense	OsKitaake01g033408
Chr1	2656146	C>A	Missense	OsKitaake01g033408
Chr1	2657448	G>A	Missense	OsKitaake01g033600
Chr1	2701646	A>G	Missense	OsKitaake01g033800
Chr1	2701999	C>T	Missense	OsKitaake01g033800
Chr1	2702066	G>A	Missense	OsKitaake01g033800
Chr1	2702294	A>T	Missense	OsKitaake01g033800
Chr1	2702356	C>G	Missense	OsKitaake01g033800
Chr1	2702481	C>A	Missense	OsKitaake01g033800
Chr1	2702706	A>C	Missense	OsKitaake01g033800
Chr1	2702857	C>A	Missense	OsKitaake01g033800
Chr1	2702860	T>A	Missense	OsKitaake01g033800
Chr1	2703184	T>A	Missense	OsKitaake01g033800
Chr1	2703202	A>G	Missense	OsKitaake01g033800
Chr1	2703743	C>G	Missense	OsKitaake01g033800
Chr1	2720583	A>G	Missense	OsKitaake01g034108
Chr1	2720624	C>G	Missense	OsKitaake01g034108
Chr1	2720714	T>C	Missense	OsKitaake01g034108
Chr1	2720757	T>A	Missense	OsKitaake01g034108
Chr1	2720821	T>G	Missense	OsKitaake01g034108
Chr1	2720972	C>T	Missense	OsKitaake01g034108
Chr1	2721038	A>G	Missense	OsKitaake01g034108
Chr1	2721080	C>T	Missense	OsKitaake01g034108
Chr1	2721138	C>T	Missense	OsKitaake01g034108
Chr1	2721339	C>T	Missense	OsKitaake01g034108
Chr1	2722038	C>T	Missense	OsKitaake01g034116
Chr1	2722134	G>T	Missense	OsKitaake01g034116
Chr1	2722345	C>T	Missense	OsKitaake01g034116
Chr1	2722372	T>G	Missense	OsKitaake01g034116
Chr1	2722528	C>T	Missense	OsKitaake01g034116
Chr1	2722815	T>C	Missense	OsKitaake01g034116
Chr1	2722826	G>A	Missense	OsKitaake01g034116
Chr1	2722886	C>T	Missense	OsKitaake01g034116
Chr1	2732099	C>G	Missense	OsKitaake01g034400
Chr1	2759634	A>C	Missense	OsKitaake01g034900
Chr1	2759793	T>C	Missense	OsKitaake01g034900
Chr1	2762064	G>T	Missense	OsKitaake01g034900
Chr1	2762308	C>G	Missense	OsKitaake01g034900
Chr1	2762323	A>G	Missense	OsKitaake01g034900
Chr1	2779839	A>G	Missense	OsKitaake01g035100
Chr1	2779878	T>C	Missense	OsKitaake01g035100
Chr1	2786483	T>A	Missense	OsKitaake01g035100
Chr1	2793212	T>C	Missense	OsKitaake01g035200
Chr1	2793259	A>G	Missense	OsKitaake01g035200
Chr1	2793265	A>G	Missense	OsKitaake01g035200
Chr1	2796084	C>A	Missense	OsKitaake01g035300
Chr1	2796312	G>T	Missense	OsKitaake01g035300
Chr1	2798978	T>C	Missense	OsKitaake01g035300
Chr1	2802510	C>A	Missense	OsKitaake01g035400
Chr1	2802513	A>G	Missense	OsKitaake01g035400
Chr1	2802515	C>A	Missense	OsKitaake01g035400
Chr1	2802555	C>T	Missense	OsKitaake01g035400
Chr1	2802612	G>A	Missense	OsKitaake01g035400
Chr1	2802636	C>T	Missense	OsKitaake01g035400
Chr1	2802747	T>C	Missense	OsKitaake01g035400
Chr1	2802774	T>C	Missense	OsKitaake01g035400
Chr1	2802857	G>A	Missense	OsKitaake01g035400
Chr1	2805898	A>G	Missense	OsKitaake01g035400
Chr1	2806247	C>T	Missense	OsKitaake01g035400
Chr1	2806339	T>A	Missense	OsKitaake01g035400
Chr1	2806598	T>A	Missense	OsKitaake01g035400
Chr1	2806903	G>C	Missense	OsKitaake01g035400
Chr1	2807170	G>A	Missense	OsKitaake01g035400
Chr1	2807176	A>G	Missense	OsKitaake01g035400
Chr1	2807362	A>T	Missense	OsKitaake01g035400
Chr1	2807392	A>G	Missense	OsKitaake01g035400
Chr1	2807526	A>G	Missense	OsKitaake01g035400
Chr1	2809075	G>T	Missense	OsKitaake01g035500
Chr1	2809120	T>A	Missense	OsKitaake01g035500
Chr1	2809122	G>C	Missense	OsKitaake01g035500
Chr1	2809123	C>T	Missense	OsKitaake01g035500
Chr1	2809344	C>G	Missense	OsKitaake01g035500
Chr1	2809357	A>C	Missense	OsKitaake01g035500
Chr1	2812849	G>A	Missense	OsKitaake01g035500
Chr1	2812966	G>A	Missense	OsKitaake01g035500
Chr1	2813243	T>A	Missense	OsKitaake01g035500
Chr1	2813341	A>C	Missense	OsKitaake01g035500
Chr1	2813351	G>A	Missense	OsKitaake01g035500
Chr1	2813649	T>A	Missense	OsKitaake01g035500
Chr1	2820693	T>G	Missense	OsKitaake01g035600
Chr1	2827986	G>A	Missense	OsKitaake01g035700
Chr1	2832498	C>G	Missense	OsKitaake01g035900
Chr1	2832517	C>T	Missense	OsKitaake01g035900
Chr1	2832538	G>A	Missense	OsKitaake01g035900
Chr1	2832559	C>G	Missense	OsKitaake01g035900
Chr1	2832590	T>C	Missense	OsKitaake01g035900
Chr1	2832688	T>G	Missense	OsKitaake01g035900
Chr1	2832889	A>G	Missense	OsKitaake01g035900
Chr1	2833377	A>T	Missense	OsKitaake01g035900
Chr1	2833787	G>A	Missense	OsKitaake01g035900
Chr1	2838860	G>C	Splice acceptor	OsKitaake01g035908
Chr1	2838864	C>A	Missense	OsKitaake01g035908
Chr1	2838873	A>T	Missense	OsKitaake01g035908
Chr1	2838885	C>T	Missense	OsKitaake01g035908
Chr1	2838945	G>C	Missense	OsKitaake01g035908
Chr1	2838947	A>T	Missense	OsKitaake01g035908
Chr1	2838951	C>G	Missense	OsKitaake01g035908
Chr1	2838953	C>G	Missense	OsKitaake01g035908
Chr1	2838960	G>T	Missense	OsKitaake01g035908
Chr1	2838963	T>C	Missense	OsKitaake01g035908
Chr1	2839045	G>C	Missense	OsKitaake01g035908
Chr1	2839056	T>C	Missense	OsKitaake01g035908
Chr1	2839076	G>A	Missense	OsKitaake01g035908
Chr1	2839185	C>A	Missense	OsKitaake01g035908
Chr1	2839195	A>G	Stop lost	OsKitaake01g035908
Chr1	2839199	C>T	Missense	OsKitaake01g035908
Chr1	2840593	G>T	Missense	OsKitaake01g036000
Chr1	2840692	C>T	Missense	OsKitaake01g036000
Chr1	2840764	G>A	Missense	OsKitaake01g036000
Chr1	2840772	A>G	Missense	OsKitaake01g036000
Chr1	2840787	C>G	Missense	OsKitaake01g036000
Chr1	2840863	G>C	Missense	OsKitaake01g036000
Chr1	2841082	G>A	Missense	OsKitaake01g036000
Chr1	2841159	C>G	Missense	OsKitaake01g036000
Chr1	2841160	A>G	Missense	OsKitaake01g036000
Chr1	2841228	A>C	Missense	OsKitaake01g036000
Chr1	2841231	T>C	Missense	OsKitaake01g036000
Chr1	2841234	C>T	Missense	OsKitaake01g036000
Chr1	2841237	A>T	Missense	OsKitaake01g036000
Chr1	2841246	G>A	Missense	OsKitaake01g036000
Chr1	2841307	C>T	Missense	OsKitaake01g036000
Chr1	2841310	A>G	Missense	OsKitaake01g036000
Chr1	2841311	C>G	Missense	OsKitaake01g036000
Chr1	2841336	A>G	Missense	OsKitaake01g036000
Chr1	2841343	A>G	Missense	OsKitaake01g036000
Chr1	2841348	C>G	Missense	OsKitaake01g036000
Chr1	2841382	G>A	Missense	OsKitaake01g036000
Chr1	2841435	A>T	Missense	OsKitaake01g036000
Chr1	2841471	G>A	Missense	OsKitaake01g036000
Chr1	2841472	A>T	Missense	OsKitaake01g036000
Chr1	2841477	A>G	Missense	OsKitaake01g036000
Chr1	2841499	G>A	Missense	OsKitaake01g036000
Chr1	2841501	G>A	Missense	OsKitaake01g036000
Chr1	2841619	C>T	Missense	OsKitaake01g036000
Chr1	2841633	G>A	Missense	OsKitaake01g036000
Chr1	2841670	T>C	Missense	OsKitaake01g036000
Chr1	2841682	C>A	Missense	OsKitaake01g036000
Chr1	2841694	C>A	Missense	OsKitaake01g036000
Chr1	2841852	T>A	Missense	OsKitaake01g036000
Chr1	2841969	G>A	Missense	OsKitaake01g036000
Chr1	2842134	G>A	Missense	OsKitaake01g036000
Chr1	2842252	A>G	Missense	OsKitaake01g036000
Chr1	2842555	C>T	Missense	OsKitaake01g036000
Chr1	2842573	T>G	Missense	OsKitaake01g036000
Chr1	2842672	A>G	Missense	OsKitaake01g036000
Chr1	2842794	A>C	Missense	OsKitaake01g036000
Chr1	2842830	G>A	Missense	OsKitaake01g036000
Chr1	2842851	A>G	Missense	OsKitaake01g036000
Chr1	2842882	A>G	Missense	OsKitaake01g036000
Chr1	2842905	G>C	Missense	OsKitaake01g036000
Chr1	2842919	G>C	Missense	OsKitaake01g036000
Chr1	2843077	T>C	Missense	OsKitaake01g036000
Chr1	2843627	T>A	Missense	OsKitaake01g036000
Chr1	2843723	G>A	Missense	OsKitaake01g036000
Chr1	2843786	A>T	Missense	OsKitaake01g036000
Chr1	2844783	T>G	Missense	OsKitaake01g036100
Chr1	2844804	T>C	Missense	OsKitaake01g036100
Chr1	2844876	T>C	Missense	OsKitaake01g036100
Chr1	2844909	T>C	Missense	OsKitaake01g036100
Chr1	2844985	C>T	Missense	OsKitaake01g036100
Chr1	2845760	G>C	Missense	OsKitaake01g036100
Chr1	2845859	C>A	Missense	OsKitaake01g036100
Chr1	2845934	T>C	Missense	OsKitaake01g036100
Chr1	2845935	C>T	Missense	OsKitaake01g036100
Chr1	2848196	G>T	Missense	OsKitaake01g036200
Chr1	2848385	G>C	Missense	OsKitaake01g036200
Chr1	2848466	A>C	Missense	OsKitaake01g036200
Chr1	2848467	G>T	Missense	OsKitaake01g036200
Chr1	2848706	G>A	Missense	OsKitaake01g036200
Chr1	2848841	C>T	Missense	OsKitaake01g036200
Chr1	2848885	A>G	Missense	OsKitaake01g036200
Chr1	2848904	G>A	Missense	OsKitaake01g036200
Chr1	2849044	G>A	Missense	OsKitaake01g036200
Chr1	2856832	C>A	Missense	OsKitaake01g036400
Chr1	2857905	C>G	Missense	OsKitaake01g036400
Chr1	2866531	C>T	Missense	OsKitaake01g036700
Chr1	2873180	T>C	Missense	OsKitaake01g036900
Chr1	2877496	G>A	Missense	OsKitaake01g037000
Chr1	2877512	C>T	Missense	OsKitaake01g037000
Chr1	2877700	T>C	Missense	OsKitaake01g037000
Chr1	2877752	A>G	Missense	OsKitaake01g037000
Chr1	2878009	C>A	Missense	OsKitaake01g037000
Chr1	2878113	G>A	Stop gained	OsKitaake01g037000
Chr1	2879056	A>G	Missense	OsKitaake01g037000
Chr1	2879089	A>C	Missense	OsKitaake01g037000
Chr1	2879680	A>G	Missense	OsKitaake01g037000
Chr1	2879863	A>G	Missense	OsKitaake01g037000
Chr1	2880376	A>C	Missense	OsKitaake01g037000
Chr1	2880514	G>A	Missense	OsKitaake01g037000
Chr1	2889841	C>T	Missense	OsKitaake01g037200
Chr1	2889873	G>T	Missense	OsKitaake01g037200
Chr1	2890437	G>T	Missense	OsKitaake01g037200
Chr1	2890831	C>G	Missense	OsKitaake01g037200
Chr1	2890832	A>C	Missense	OsKitaake01g037200
Chr1	2891474	A>G	Missense	OsKitaake01g037200
Chr1	2892122	C>A	Missense	OsKitaake01g037200
Chr1	2892146	G>A	Missense	OsKitaake01g037200
Chr1	2898745	T>C	Missense	OsKitaake01g037400
Chr1	2898788	G>T	Missense	OsKitaake01g037400
Chr1	2898794	A>T	Missense	OsKitaake01g037400
Chr1	2898823	G>T	Missense	OsKitaake01g037400
Chr1	2898837	C>A	Missense	OsKitaake01g037400
Chr1	2901306	A>T	Missense	OsKitaake01g037400
Chr1	2904196	G>T	Missense	OsKitaake01g037400
Chr1	2911636	A>G	Missense	OsKitaake01g037500
Chr1	2911645	G>A	Missense	OsKitaake01g037500
Chr1	2911659	C>G	Missense	OsKitaake01g037500
Chr1	2911663	G>A	Missense	OsKitaake01g037500
Chr1	2911668	T>G	Missense	OsKitaake01g037500
Chr1	2911674	A>G	Missense	OsKitaake01g037500
Chr1	2911725	T>A	Missense	OsKitaake01g037500
Chr1	2911743	G>T	Missense	OsKitaake01g037500
Chr1	2911755	T>G	Missense	OsKitaake01g037500
Chr1	2911776	A>G	Missense	OsKitaake01g037500
Chr1	2911778	C>A	Missense	OsKitaake01g037500
Chr1	2912055	C>A	Missense	OsKitaake01g037500
Chr1	2913149	T>C	Missense	OsKitaake01g037600
Chr1	2935711	A>G	Missense	OsKitaake01g037608
Chr1	2935778	G>A	Missense	OsKitaake01g037608
Chr1	2935955	C>T	Missense	OsKitaake01g037608
Chr1	2936024	A>G	Missense	OsKitaake01g037608
Chr1	2937129	G>A	Missense	OsKitaake01g037616
Chr1	2938344	T>C	Missense	OsKitaake01g037624
Chr1	2938434	T>C	Missense	OsKitaake01g037624
Chr1	2940217	G>T	Missense	OsKitaake01g037632
Chr1	2940855	A>C	Missense	OsKitaake01g037632
Chr1	2943005	T>G	Missense	OsKitaake01g037640
Chr1	2943006	G>A	Stop gained	OsKitaake01g037640
Chr1	2994023	C>A	Missense	OsKitaake01g037700
Chr1	2998591	G>T	Missense	OsKitaake01g037800
Chr1	2998858	C>A	Missense	OsKitaake01g037800
Chr1	3002068	A>G	Missense	OsKitaake01g037900
Chr1	3002116	G>A	Missense	OsKitaake01g037900
Chr1	3005329	G>A	Missense	OsKitaake01g038000
Chr1	3005600	A>T	Missense	OsKitaake01g038000
Chr1	3005677	C>G	Missense	OsKitaake01g038000
Chr1	3044689	C>A	Missense	OsKitaake01g038200
Chr1	3052461	C>A	Missense	OsKitaake01g038500
Chr1	3053206	G>A	Missense	OsKitaake01g038500
Chr1	3053230	G>A	Missense	OsKitaake01g038500
Chr1	3053893	A>C	Missense	OsKitaake01g038500
Chr1	3061255	C>G	Missense	OsKitaake01g038700
Chr1	3075081	C>G	Missense	OsKitaake01g038800
Chr1	3084913	T>C	Missense	OsKitaake01g039100
Chr1	3091343	A>C	Missense	OsKitaake01g039300
Chr1	3091450	G>T	Missense	OsKitaake01g039300
Chr1	3106924	C>T	Missense	OsKitaake01g039800
Chr1	3107061	A>G	Missense	OsKitaake01g039800
Chr1	3107097	G>A	Missense	OsKitaake01g039800
Chr1	3107125	C>T	Missense	OsKitaake01g039800
Chr1	3110216	C>T	Missense	OsKitaake01g040000
Chr1	3113342	C>A	Missense	OsKitaake01g040200
Chr1	3113609	G>A	Missense	OsKitaake01g040200
Chr1	3114847	C>T	Missense	OsKitaake01g040300
Chr1	3115345	A>G	Missense	OsKitaake01g040300
Chr1	3115496	A>T	Missense	OsKitaake01g040300
Chr1	3115756	C>G	Missense	OsKitaake01g040300
Chr1	3116864	G>T	Missense	OsKitaake01g040400
Chr1	3118409	C>T	Missense	OsKitaake01g040400
Chr1	3119874	C>A	Missense	OsKitaake01g040500
Chr1	3122668	C>G	Missense	OsKitaake01g040600
Chr1	3124835	A>G	Missense	OsKitaake01g040600
Chr1	3127530	C>T	Missense	OsKitaake01g040700
Chr1	3129748	C>A	Missense	OsKitaake01g040800
Chr1	3129780	G>T	Missense	OsKitaake01g040800
Chr1	3129786	T>C	Missense	OsKitaake01g040800
Chr1	3129787	C>A	Missense	OsKitaake01g040800
Chr1	3129835	C>G	Missense	OsKitaake01g040800
Chr1	3130284	C>G	Missense	OsKitaake01g040800
Chr1	3131078	C>T	Missense	OsKitaake01g040800
Chr1	3131305	C>T	Missense	OsKitaake01g040800
Chr1	3132102	G>T	Missense	OsKitaake01g040800
Chr1	3134053	A>G	Missense	OsKitaake01g040900
Chr1	3134074	C>A	Missense	OsKitaake01g040900
Chr1	3134288	T>C	Missense	OsKitaake01g040900
Chr1	3134656	T>G	Missense	OsKitaake01g040900
Chr1	3173523	G>T	Missense	OsKitaake01g041500
Chr1	3173584	A>G	Missense	OsKitaake01g041500
Chr1	3174102	T>G	Missense	OsKitaake01g041500
Chr1	3175189	T>A	Missense	OsKitaake01g041500
Chr1	3175457	C>T	Missense	OsKitaake01g041500
Chr1	3176611	T>C	Missense	OsKitaake01g041500
Chr1	3177273	G>A	Missense	OsKitaake01g041500
Chr1	3177390	C>T	Missense	OsKitaake01g041500
Chr1	3177732	G>T	Missense	OsKitaake01g041500
Chr1	3178253	A>G	Missense	OsKitaake01g041500
Chr1	3178346	G>A	Missense	OsKitaake01g041500
Chr1	3178367	G>A	Missense	OsKitaake01g041500
Chr1	3190957	T>C	Missense	OsKitaake01g041600
Chr1	3191127	C>T	Missense	OsKitaake01g041600
Chr1	3191193	C>T	Missense	OsKitaake01g041600
Chr1	3191418	T>C	Missense	OsKitaake01g041600
Chr1	3191429	T>C	Missense	OsKitaake01g041600
Chr1	3197546	A>C	Missense	OsKitaake01g041700
Chr1	3230333	A>G	Missense	OsKitaake01g042200
Chr1	3239872	T>C	Missense	OsKitaake01g042300
Chr1	3240017	T>G	Missense	OsKitaake01g042300
Chr1	3240020	C>G	Missense	OsKitaake01g042300
Chr1	3240029	C>G	Missense	OsKitaake01g042300
Chr1	3257018	A>G	Missense	OsKitaake01g042500
Chr1	3257025	A>G	Missense	OsKitaake01g042500
Chr1	3257254	G>C	Missense	OsKitaake01g042500
Chr1	3259965	A>C	Missense	OsKitaake01g042700
Chr1	3260005	A>C	Missense	OsKitaake01g042700
Chr1	3260050	T>C	Missense	OsKitaake01g042700
Chr1	3260058	T>C	Missense	OsKitaake01g042700
Chr1	3260121	A>G	Missense	OsKitaake01g042700
Chr1	3260185	A>C	Missense	OsKitaake01g042700
Chr1	3260221	C>A	Missense	OsKitaake01g042700
Chr1	3260326	C>G	Missense	OsKitaake01g042700
Chr1	3260359	T>C	Missense	OsKitaake01g042700
Chr1	3260374	G>A	Missense	OsKitaake01g042700
Chr1	3260383	T>A	Missense	OsKitaake01g042700
Chr1	3260667	G>A	Missense	OsKitaake01g042700
Chr1	3260726	T>G	Missense	OsKitaake01g042700
Chr1	3260797	T>C	Missense	OsKitaake01g042700
Chr1	3260891	G>C	Missense	OsKitaake01g042700
Chr1	3260958	G>A	Missense	OsKitaake01g042700
Chr1	3260962	A>G	Missense	OsKitaake01g042700
Chr1	3261022	T>C	Missense	OsKitaake01g042700
Chr1	3261023	C>A	Missense	OsKitaake01g042700
Chr1	3261094	T>C	Missense	OsKitaake01g042700
Chr1	3261102	A>G	Missense	OsKitaake01g042700
Chr1	3261238	C>T	Missense	OsKitaake01g042700
Chr1	3261253	C>A	Missense	OsKitaake01g042700
Chr1	3261418	A>G	Missense	OsKitaake01g042700
Chr1	3261453	G>A	Missense	OsKitaake01g042700
Chr1	3261468	C>T	Missense	OsKitaake01g042700
Chr1	3261472	C>A	Missense	OsKitaake01g042700
Chr1	3261679	G>A	Missense	OsKitaake01g042700
Chr1	3261680	G>T	Missense	OsKitaake01g042700
Chr1	3261687	C>T	Missense	OsKitaake01g042700
Chr1	3261691	C>A	Missense	OsKitaake01g042700
Chr1	3261805	C>T	Missense	OsKitaake01g042700
Chr1	3261904	G>C	Missense	OsKitaake01g042700
Chr1	3262111	C>A	Missense	OsKitaake01g042700
Chr1	3262113	A>C	Missense	OsKitaake01g042700
Chr1	3262163	C>G	Missense	OsKitaake01g042700
Chr1	3262171	A>C	Missense	OsKitaake01g042700
Chr1	3262194	T>C	Missense	OsKitaake01g042700
Chr1	3262293	T>C	Missense	OsKitaake01g042700
Chr1	3262606	C>T	Missense	OsKitaake01g042700
Chr1	3262684	T>C	Missense	OsKitaake01g042700
Chr1	3262783	T>C	Missense	OsKitaake01g042700
Chr1	3262789	A>G	Missense	OsKitaake01g042700
Chr1	3262981	C>T	Missense	OsKitaake01g042700
Chr1	3262995	A>G	Missense	OsKitaake01g042700
Chr1	3274187	G>A	Missense	OsKitaake01g042900
Chr1	3274201	G>A	Missense	OsKitaake01g042900
Chr1	3274202	A>G	Missense	OsKitaake01g042900
Chr1	3274219	A>C	Missense	OsKitaake01g042900
Chr1	3274237	A>G	Missense	OsKitaake01g042900
Chr1	3274265	G>A	Missense	OsKitaake01g042900
Chr1	3274270	G>A	Missense	OsKitaake01g042900
Chr1	3274271	A>G	Missense	OsKitaake01g042900
Chr1	3274293	C>G	Missense	OsKitaake01g042900
Chr1	3274300	T>A	Missense	OsKitaake01g042900
Chr1	3274310	G>C	Missense	OsKitaake01g042900
Chr1	3274322	C>T	Missense	OsKitaake01g042900
Chr1	3274329	C>A	Missense	OsKitaake01g042900
Chr1	3274330	T>A	Missense	OsKitaake01g042900
Chr1	3274336	A>C	Missense	OsKitaake01g042900
Chr1	3274337	A>G	Missense	OsKitaake01g042900
Chr1	3274339	T>G	Missense	OsKitaake01g042900
Chr1	3274341	C>A	Missense	OsKitaake01g042900
Chr1	3274355	C>T	Missense	OsKitaake01g042900
Chr1	3274364	T>C	Missense	OsKitaake01g042900
Chr1	3274366	T>A	Missense	OsKitaake01g042900
Chr1	3274368	T>A	Missense	OsKitaake01g042900
Chr1	3274372	C>A	Missense	OsKitaake01g042900
Chr1	3274373	A>C	Missense	OsKitaake01g042900
Chr1	3274378	G>A	Missense	OsKitaake01g042900
Chr1	3274400	A>T	Missense	OsKitaake01g042900
Chr1	3274402	G>T	Missense	OsKitaake01g042900
Chr1	3274418	A>G	Missense	OsKitaake01g042900
Chr1	3274430	A>C	Missense	OsKitaake01g042900
Chr1	3274435	A>T	Missense	OsKitaake01g042900
Chr1	3274438	C>A	Missense	OsKitaake01g042900
Chr1	3274459	A>T	Missense	OsKitaake01g042900
Chr1	3274461	A>G	Missense	OsKitaake01g042900
Chr1	3274472	A>C	Missense	OsKitaake01g042900
Chr1	3274475	G>A	Missense	OsKitaake01g042900
Chr1	3274501	A>T	Missense	OsKitaake01g042900
Chr1	3274503	A>G	Missense	OsKitaake01g042900
Chr1	3274516	G>C	Missense	OsKitaake01g042900
Chr1	3274519	T>C	Missense	OsKitaake01g042900
Chr1	3274520	C>A	Missense	OsKitaake01g042900
Chr1	3274543	A>G	Missense	OsKitaake01g042900
Chr1	3274549	G>A	Missense	OsKitaake01g042900
Chr1	3274573	A>G	Missense	OsKitaake01g042900
Chr1	3274585	A>G	Missense	OsKitaake01g042900
Chr1	3274591	T>G	Missense	OsKitaake01g042900
Chr1	3274609	C>A	Missense	OsKitaake01g042900
Chr1	3274610	C>G	Missense	OsKitaake01g042900
Chr1	3274618	G>T	Missense	OsKitaake01g042900
Chr1	3274619	T>C	Missense	OsKitaake01g042900
Chr1	3274621	G>A	Missense	OsKitaake01g042900
Chr1	3274636	A>T	Missense	OsKitaake01g042900
Chr1	3274688	T>A	Missense	OsKitaake01g042900
Chr1	3274693	A>G	Missense	OsKitaake01g042900
Chr1	3274695	C>G	Missense	OsKitaake01g042900
Chr1	3274700	A>G	Missense	OsKitaake01g042900
Chr1	3274701	G>T	Missense	OsKitaake01g042900
Chr1	3274733	G>A	Missense	OsKitaake01g042900
Chr1	3274751	G>A	Missense	OsKitaake01g042900
Chr1	3274759	A>G	Missense	OsKitaake01g042900
Chr1	3274760	C>A	Missense	OsKitaake01g042900
Chr1	3274762	A>T	Missense	OsKitaake01g042900
Chr1	3274774	G>A	Missense	OsKitaake01g042900
Chr1	3274793	G>A	Missense	OsKitaake01g042900
Chr1	3274809	G>A	Splice donor	OsKitaake01g042900
Chr1	3274810	T>A	Splice donor	OsKitaake01g042900
Chr1	3274899	C>T	Missense	OsKitaake01g042900
Chr1	3274905	T>G	Missense	OsKitaake01g042900
Chr1	3274906	C>T	Missense	OsKitaake01g042900
Chr1	3274909	T>A	Missense	OsKitaake01g042900
Chr1	3274921	T>A	Missense	OsKitaake01g042900
Chr1	3274926	A>G	Missense	OsKitaake01g042900
Chr1	3274929	A>C	Missense	OsKitaake01g042900
Chr1	3274930	A>T	Missense	OsKitaake01g042900
Chr1	3274950	G>A	Missense	OsKitaake01g042900
Chr1	3274995	T>C	Missense	OsKitaake01g042900
Chr1	3275014	G>A	Missense	OsKitaake01g042900
Chr1	3275043	G>A	Missense	OsKitaake01g042900
Chr1	3275053	T>G	Missense	OsKitaake01g042900
Chr1	3275055	C>G	Missense	OsKitaake01g042900
Chr1	3275056	A>G	Missense	OsKitaake01g042900
Chr1	3275062	A>C	Missense	OsKitaake01g042900
Chr1	3275063	A>C	Missense	OsKitaake01g042900
Chr1	3275064	A>T	Missense	OsKitaake01g042900
Chr1	3275065	T>A	Missense	OsKitaake01g042900
Chr1	3275106	C>G	Missense	OsKitaake01g042900
Chr1	3275119	G>C	Missense	OsKitaake01g042900
Chr1	3275122	G>C	Missense	OsKitaake01g042900
Chr1	3275123	C>A	Missense	OsKitaake01g042900
Chr1	3275154	A>T	Missense	OsKitaake01g042900
Chr1	3275169	A>T	Missense	OsKitaake01g042900
Chr1	3275175	T>C	Missense	OsKitaake01g042900
Chr1	3275181	C>A	Missense	OsKitaake01g042900
Chr1	3275186	C>G	Missense	OsKitaake01g042900
Chr1	3275196	G>A	Missense	OsKitaake01g042900
Chr1	3275197	G>A	Missense	OsKitaake01g042900
Chr1	3275200	C>T	Missense	OsKitaake01g042900
Chr1	3275241	C>G	Missense	OsKitaake01g042900
Chr1	3275253	A>T	Missense	OsKitaake01g042900
Chr1	3275274	T>A	Missense	OsKitaake01g042900
Chr1	3275281	T>C	Missense	OsKitaake01g042900
Chr1	3275283	C>A	Missense	OsKitaake01g042900
Chr1	3275303	C>G	Missense	OsKitaake01g042900
Chr1	3275323	C>G	Missense	OsKitaake01g042900
Chr1	3275345	A>C	Missense	OsKitaake01g042900
Chr1	3275383	G>A	Missense	OsKitaake01g042900
Chr1	3275406	A>G	Missense	OsKitaake01g042900
Chr1	3275407	C>T	Missense	OsKitaake01g042900
Chr1	3275416	G>A	Missense	OsKitaake01g042900
Chr1	3275447	G>T	Missense	OsKitaake01g042900
Chr1	3275469	T>A	Missense	OsKitaake01g042900
Chr1	3275483	C>A	Missense	OsKitaake01g042900
Chr1	3275485	A>G	Missense	OsKitaake01g042900
Chr1	3275486	A>C	Missense	OsKitaake01g042900
Chr1	3275493	A>G	Missense	OsKitaake01g042900
Chr1	3275495	T>A	Missense	OsKitaake01g042900
Chr1	3275551	A>G	Missense	OsKitaake01g042900
Chr1	3275557	A>C	Missense	OsKitaake01g042900
Chr1	3275566	C>T	Missense	OsKitaake01g042900
Chr1	3275591	C>A	Missense	OsKitaake01g042900
Chr1	3275595	G>A	Missense	OsKitaake01g042900
Chr1	3275603	T>A	Missense	OsKitaake01g042900
Chr1	3275604	G>A	Missense	OsKitaake01g042900
Chr1	3275608	C>T	Missense	OsKitaake01g042900
Chr1	3275620	A>T	Missense	OsKitaake01g042900
Chr1	3275622	A>G	Missense	OsKitaake01g042900
Chr1	3275631	A>C	Missense	OsKitaake01g042900
Chr1	3275634	A>C	Missense	OsKitaake01g042900
Chr1	3275640	A>G	Missense	OsKitaake01g042900
Chr1	3275653	C>A	Missense	OsKitaake01g042900
Chr1	3275667	A>T	Missense	OsKitaake01g042900
Chr1	3275679	A>G	Missense	OsKitaake01g042900
Chr1	3275687	G>C	Missense	OsKitaake01g042900
Chr1	3275689	T>A	Missense	OsKitaake01g042900
Chr1	3275690	G>T	Missense	OsKitaake01g042900
Chr1	3275691	G>T	Stop gained	OsKitaake01g042900
Chr1	3275718	C>A	Missense	OsKitaake01g042900
Chr1	3275757	A>G	Missense	OsKitaake01g042900
Chr1	3275765	G>T	Missense	OsKitaake01g042900
Chr1	3275787	A>G	Missense	OsKitaake01g042900
Chr1	3275823	A>G	Missense	OsKitaake01g042900
Chr1	3275833	G>C	Missense	OsKitaake01g042900
Chr1	3275842	G>A	Missense	OsKitaake01g042900
Chr1	3275849	G>C	Missense	OsKitaake01g042900
Chr1	3275932	T>C	Missense	OsKitaake01g042900
Chr1	3275953	A>T	Missense	OsKitaake01g042900
Chr1	3275980	T>C	Missense	OsKitaake01g042900
Chr1	3275992	C>T	Missense	OsKitaake01g042900
Chr1	3276052	T>G	Missense	OsKitaake01g042900
Chr1	3276058	G>A	Missense	OsKitaake01g042900
Chr1	3276090	G>C	Missense	OsKitaake01g042900
Chr1	3276168	G>A	Missense	OsKitaake01g042900
Chr1	3276180	A>T	Missense	OsKitaake01g042900
Chr1	3300464	A>G	Missense	OsKitaake01g043200
Chr1	3300503	C>G	Missense	OsKitaake01g043200
Chr1	3300605	A>G	Missense	OsKitaake01g043200
Chr1	3300616	C>G	Missense	OsKitaake01g043200
Chr1	3300633	T>C	Missense	OsKitaake01g043200
Chr1	3300636	A>G	Missense	OsKitaake01g043200
Chr1	3300662	G>A	Missense	OsKitaake01g043200
Chr1	3300764	A>T	Missense	OsKitaake01g043200
Chr1	3300765	C>T	Missense	OsKitaake01g043200
Chr1	3300788	G>C	Missense	OsKitaake01g043200
Chr1	3300951	T>A	Missense	OsKitaake01g043200
Chr1	3300963	C>A	Missense	OsKitaake01g043200
Chr1	3301019	A>C	Missense	OsKitaake01g043200
Chr1	3301070	G>C	Missense	OsKitaake01g043200
Chr1	3301172	T>C	Missense	OsKitaake01g043200
Chr1	3301178	G>A	Missense	OsKitaake01g043200
Chr1	3301222	G>C	Missense	OsKitaake01g043200
Chr1	3301230	A>C	Missense	OsKitaake01g043200
Chr1	3301244	G>A	Missense	OsKitaake01g043200
Chr1	3301245	G>A	Missense	OsKitaake01g043200
Chr1	3301392	C>T	Missense	OsKitaake01g043200
Chr1	3301411	A>G	Missense	OsKitaake01g043200
Chr1	3301424	G>A	Missense	OsKitaake01g043200
Chr1	3301463	A>G	Missense	OsKitaake01g043200
Chr1	3301500	A>G	Missense	OsKitaake01g043200
Chr1	3301525	C>G	Missense	OsKitaake01g043200
Chr1	3301586	T>G	Missense	OsKitaake01g043200
Chr1	3301659	A>C	Missense	OsKitaake01g043200
Chr1	3301691	C>T	Missense	OsKitaake01g043200
Chr1	3301730	G>T	Missense	OsKitaake01g043200
Chr1	3301742	C>T	Missense	OsKitaake01g043200
Chr1	3301745	T>C	Missense	OsKitaake01g043200
Chr1	3301746	A>T	Missense	OsKitaake01g043200
Chr1	3301957	G>T	Missense	OsKitaake01g043200
Chr1	3301999	A>T	Missense	OsKitaake01g043200
Chr1	3302057	C>A	Missense	OsKitaake01g043200
Chr1	3302062	C>G	Missense	OsKitaake01g043200
Chr1	3302063	A>T	Missense	OsKitaake01g043200
Chr1	3302064	C>G	Missense	OsKitaake01g043200
Chr1	3302068	G>C	Missense	OsKitaake01g043200
Chr1	3302103	G>C	Missense	OsKitaake01g043200
Chr1	3302212	G>T	Missense	OsKitaake01g043200
Chr1	3302239	A>G	Missense	OsKitaake01g043200
Chr1	3302546	A>G	Missense	OsKitaake01g043200
Chr1	3302647	A>G	Missense	OsKitaake01g043200
Chr1	3303103	A>G	Missense	OsKitaake01g043200
Chr1	3303109	G>A	Missense	OsKitaake01g043200
Chr1	3303193	G>A	Missense	OsKitaake01g043200
Chr1	3303601	T>C	Missense	OsKitaake01g043200
Chr1	3303622	G>A	Missense	OsKitaake01g043200
Chr1	3303716	G>A	Missense	OsKitaake01g043200
Chr1	3303743	C>G	Missense	OsKitaake01g043200
Chr1	3318085	G>C	Missense	OsKitaake01g043300
Chr1	3318275	C>G	Missense	OsKitaake01g043300
Chr1	3318282	A>C	Missense	OsKitaake01g043300
Chr1	3318331	G>A	Missense	OsKitaake01g043300
Chr1	3318345	G>T	Missense	OsKitaake01g043300
Chr1	3318351	T>G	Missense	OsKitaake01g043300
Chr1	3318356	C>A	Missense	OsKitaake01g043300
Chr1	3318413	A>C	Missense	OsKitaake01g043300
Chr1	3318418	A>G	Missense	OsKitaake01g043300
Chr1	3318421	G>A	Missense	OsKitaake01g043300
Chr1	3318423	A>T	Missense	OsKitaake01g043300
Chr1	3318424	G>C	Missense	OsKitaake01g043300
Chr1	3318429	A>T	Missense	OsKitaake01g043300
Chr1	3318489	C>A	Missense	OsKitaake01g043300
Chr1	3318499	G>A	Missense	OsKitaake01g043300
Chr1	3318511	T>A	Missense	OsKitaake01g043300
Chr1	3318565	A>G	Missense	OsKitaake01g043300
Chr1	3318580	A>G	Missense	OsKitaake01g043300
Chr1	3318582	A>G	Missense	OsKitaake01g043300
Chr1	3318592	G>A	Missense	OsKitaake01g043300
Chr1	3318594	C>G	Missense	OsKitaake01g043300
Chr1	3318595	G>A	Missense	OsKitaake01g043300
Chr1	3318600	A>T	Missense	OsKitaake01g043300
Chr1	3318601	G>C	Missense	OsKitaake01g043300
Chr1	3318655	C>A	Missense	OsKitaake01g043300
Chr1	3318666	T>A	Missense	OsKitaake01g043300
Chr1	3318726	A>C	Missense	OsKitaake01g043300
Chr1	3318727	G>A	Missense	OsKitaake01g043300
Chr1	3318745	G>A	Missense	OsKitaake01g043300
Chr1	3318764	A>C	Missense	OsKitaake01g043300
Chr1	3318804	G>T	Missense	OsKitaake01g043300
Chr1	3318805	G>A	Missense	OsKitaake01g043300
Chr1	3318810	T>G	Missense	OsKitaake01g043300
Chr1	3318811	C>A	Missense	OsKitaake01g043300
Chr1	3318942	G>T	Missense	OsKitaake01g043300
Chr1	3319092	G>A	Missense	OsKitaake01g043300
Chr1	3319098	T>C	Missense	OsKitaake01g043300
Chr1	3319165	A>C	Missense	OsKitaake01g043300
Chr1	3319177	G>A	Missense	OsKitaake01g043300
Chr1	3319201	C>A	Missense	OsKitaake01g043300
Chr1	3319244	T>G	Missense	OsKitaake01g043300
Chr1	3319249	G>T	Missense	OsKitaake01g043300
Chr1	3319252	G>A	Missense	OsKitaake01g043300
Chr1	3319259	T>A	Missense	OsKitaake01g043300
Chr1	3319269	T>A	Missense	OsKitaake01g043300
Chr1	3319324	G>A	Missense	OsKitaake01g043300
Chr1	3319336	T>C	Missense	OsKitaake01g043300
Chr1	3319362	G>A	Missense	OsKitaake01g043300
Chr1	3319383	G>A	Missense	OsKitaake01g043300
Chr1	3319390	G>A	Missense	OsKitaake01g043300
Chr1	3319399	A>G	Missense	OsKitaake01g043300
Chr1	3319409	A>C	Missense	OsKitaake01g043300
Chr1	3319462	G>C	Missense	OsKitaake01g043300
Chr1	3319469	G>T	Missense	OsKitaake01g043300
Chr1	3319471	C>A	Missense	OsKitaake01g043300
Chr1	3319476	G>A	Missense	OsKitaake01g043300
Chr1	3322155	G>A	Missense	OsKitaake01g043300
Chr1	3322161	C>T	Missense	OsKitaake01g043300
Chr1	3322165	T>G	Missense	OsKitaake01g043300
Chr1	3322180	G>A	Missense	OsKitaake01g043300
Chr1	3322185	G>A	Missense	OsKitaake01g043300
Chr1	3322186	G>T	Missense	OsKitaake01g043300
Chr1	3322189	C>G	Missense	OsKitaake01g043300
Chr1	3322228	T>C	Missense	OsKitaake01g043300
Chr1	3322239	C>T	Missense	OsKitaake01g043300
Chr1	3322246	G>C	Missense	OsKitaake01g043300
Chr1	3322248	G>T	Missense	OsKitaake01g043300
Chr1	3322260	G>A	Missense	OsKitaake01g043300
Chr1	3322262	T>C	Splice donor	OsKitaake01g043300
Chr1	3322317	T>A	Missense	OsKitaake01g043300
Chr1	3322333	A>G	Missense	OsKitaake01g043300
Chr1	3322379	T>G	Missense	OsKitaake01g043300
Chr1	3322392	C>G	Missense	OsKitaake01g043300
Chr1	3322446	G>A	Missense	OsKitaake01g043300
Chr1	3322464	T>C	Missense	OsKitaake01g043300
Chr1	3322482	T>C	Missense	OsKitaake01g043300
Chr1	3322543	G>C	Missense	OsKitaake01g043300
Chr1	3322629	G>A	Missense	OsKitaake01g043300
Chr1	3322732	G>T	Missense	OsKitaake01g043300
Chr1	3322806	T>C	Missense	OsKitaake01g043300
Chr1	3322915	T>C	Missense	OsKitaake01g043300
Chr1	3323118	C>G	Missense	OsKitaake01g043300
Chr1	3323124	A>G	Missense	OsKitaake01g043300
Chr1	3323137	T>C	Missense	OsKitaake01g043300
Chr1	3323182	C>A	Missense	OsKitaake01g043300
Chr1	3323223	T>A	Missense	OsKitaake01g043300
Chr1	3323225	C>A	Missense	OsKitaake01g043300
Chr1	3323227	T>A	Missense	OsKitaake01g043300
Chr1	3323250	G>A	Missense	OsKitaake01g043300
Chr1	3323271	C>T	Stop gained	OsKitaake01g043300
Chr1	3323273	G>T	Missense	OsKitaake01g043300
Chr1	3323351	C>G	Missense	OsKitaake01g043300
Chr1	3323371	A>T	Missense	OsKitaake01g043300
Chr1	3323372	C>A	Missense	OsKitaake01g043300
Chr1	3323374	A>C	Missense	OsKitaake01g043300
Chr1	3323381	G>C	Missense	OsKitaake01g043300
Chr1	3323383	G>A	Missense	OsKitaake01g043300
Chr1	3323385	G>C	Missense	OsKitaake01g043300
Chr1	3323400	G>C	Missense	OsKitaake01g043300
Chr1	3323401	A>G	Missense	OsKitaake01g043300
Chr1	3323410	T>C	Missense	OsKitaake01g043300
Chr1	3323413	A>G	Missense	OsKitaake01g043300
Chr1	3323415	G>A	Missense	OsKitaake01g043300
Chr1	3323416	C>T	Missense	OsKitaake01g043300
Chr1	3323421	G>C	Missense	OsKitaake01g043300
Chr1	3323433	G>A	Missense	OsKitaake01g043300
Chr1	3323437	T>A	Missense	OsKitaake01g043300
Chr1	3323449	G>C	Missense	OsKitaake01g043300
Chr1	3323460	G>A	Missense	OsKitaake01g043300
Chr1	3323461	G>A	Missense	OsKitaake01g043300
Chr1	3323464	T>C	Missense	OsKitaake01g043300
Chr1	3323465	G>T	Missense	OsKitaake01g043300
Chr1	3323470	C>T	Missense	OsKitaake01g043300
Chr1	3323499	T>G	Missense	OsKitaake01g043300
Chr1	3323500	T>C	Missense	OsKitaake01g043300
Chr1	3323548	T>G	Stop gained	OsKitaake01g043300
Chr1	3323550	C>G	Missense	OsKitaake01g043300
Chr1	3323551	A>G	Missense	OsKitaake01g043300
Chr1	3323560	T>C	Missense	OsKitaake01g043300
Chr1	3323563	T>C	Missense	OsKitaake01g043300
Chr1	3323569	G>A	Missense	OsKitaake01g043300
Chr1	3323574	C>T	Missense	OsKitaake01g043300
Chr1	3323580	A>C	Missense	OsKitaake01g043300
Chr1	3323586	T>C	Missense	OsKitaake01g043300
Chr1	3323599	T>C	Missense	OsKitaake01g043300
Chr1	3323604	G>C	Missense	OsKitaake01g043300
Chr1	3323613	C>T	Missense	OsKitaake01g043300
Chr1	3323637	G>C	Missense	OsKitaake01g043300
Chr1	3323686	C>T	Missense	OsKitaake01g043300
Chr1	3323688	G>C	Missense	OsKitaake01g043300
Chr1	3323785	A>G	Missense	OsKitaake01g043300
Chr1	3323808	T>A	Missense	OsKitaake01g043300
Chr1	3323826	C>T	Missense	OsKitaake01g043300
Chr1	3323908	A>G	Missense	OsKitaake01g043300
Chr1	3323946	G>A	Missense	OsKitaake01g043300
Chr1	3326880	T>C	Missense	OsKitaake01g043500
Chr1	3327004	A>G	Missense	OsKitaake01g043500
Chr1	3327141	C>G	Missense	OsKitaake01g043500
Chr1	3327387	T>C	Missense	OsKitaake01g043500
Chr1	3327578	G>C	Missense	OsKitaake01g043500
Chr1	3327587	T>A	Missense	OsKitaake01g043500
Chr1	3327594	G>A	Missense	OsKitaake01g043500
Chr1	3327673	G>C	Missense	OsKitaake01g043500
Chr1	3327763	C>T	Missense	OsKitaake01g043500
Chr1	3327781	C>G	Missense	OsKitaake01g043500
Chr1	3327810	G>A	Missense	OsKitaake01g043500
Chr1	3327822	A>C	Missense	OsKitaake01g043500
Chr1	3328049	T>A	Missense	OsKitaake01g043500
Chr1	3328180	A>G	Missense	OsKitaake01g043500
Chr1	3331461	C>A	Missense	OsKitaake01g043500
Chr1	3331534	C>A	Missense	OsKitaake01g043500
Chr1	3331542	A>C	Missense	OsKitaake01g043500
Chr1	3331609	A>C	Missense	OsKitaake01g043500
Chr1	3331764	T>C	Missense	OsKitaake01g043500
Chr1	3331776	C>A	Missense	OsKitaake01g043500
Chr1	3331833	A>G	Missense	OsKitaake01g043500
Chr1	3331878	G>T	Missense	OsKitaake01g043500
Chr1	3331895	T>G	Missense	OsKitaake01g043500
Chr1	3331939	A>T	Missense	OsKitaake01g043500
Chr1	3331966	A>T	Missense	OsKitaake01g043500
Chr1	3332000	A>G	Missense	OsKitaake01g043500
Chr1	3332050	A>C	Missense	OsKitaake01g043500
Chr1	3332558	G>A	Missense	OsKitaake01g043500
Chr1	3332687	A>T	Missense	OsKitaake01g043500
Chr1	3332731	G>A	Missense	OsKitaake01g043500
Chr1	3332778	T>C	Missense	OsKitaake01g043500
Chr1	3332805	C>T	Missense	OsKitaake01g043500
Chr1	3343499	A>G	Missense	OsKitaake01g043600
Chr1	3343956	G>C	Missense	OsKitaake01g043600
Chr1	3344236	T>G	Missense	OsKitaake01g043600
Chr1	3344476	A>C	Missense	OsKitaake01g043600
Chr1	3347100	C>T	Missense	OsKitaake01g043800
Chr1	3347238	G>A	Missense	OsKitaake01g043800
Chr1	3347294	A>G	Missense	OsKitaake01g043800
Chr1	3347544	A>G	Missense	OsKitaake01g043800
Chr1	3349827	T>C	Splice acceptor	OsKitaake01g043900
Chr1	3349863	G>A	Missense	OsKitaake01g043900
Chr1	3349941	T>C	Missense	OsKitaake01g043900
Chr1	3354920	C>T	Missense	OsKitaake01g044100
Chr1	3355459	G>A	Missense	OsKitaake01g044100
Chr1	3359097	C>T	Missense	OsKitaake01g044200
Chr1	3359361	C>T	Missense	OsKitaake01g044200
Chr1	3362220	G>A	Missense	OsKitaake01g044300
Chr1	3364674	G>A	Missense	OsKitaake01g044400
Chr1	3364817	G>A	Missense	OsKitaake01g044400
Chr1	3364914	T>C	Missense	OsKitaake01g044400
Chr1	3373523	A>G	Missense	OsKitaake01g044500
Chr1	3375641	G>A	Missense	OsKitaake01g044600
Chr1	3375838	T>C	Missense	OsKitaake01g044600
Chr1	3376033	G>A	Missense	OsKitaake01g044600
Chr1	3378320	C>T	Missense	OsKitaake01g044700
Chr1	3378443	C>T	Missense	OsKitaake01g044700
Chr1	3378446	T>C	Missense	OsKitaake01g044700
Chr1	3378481	G>T	Missense	OsKitaake01g044700
Chr1	3378572	G>A	Missense	OsKitaake01g044700
Chr1	3378668	C>A	Missense	OsKitaake01g044700
Chr1	3381236	T>C	Missense	OsKitaake01g044800
Chr1	3381484	G>T	Missense	OsKitaake01g044800
Chr1	3381490	T>G	Missense	OsKitaake01g044800
Chr1	3381493	T>G	Missense	OsKitaake01g044800
Chr1	3383590	T>G	Missense	OsKitaake01g044900
Chr1	3383667	G>A	Missense	OsKitaake01g044900
Chr1	3385032	T>A	Missense	OsKitaake01g044900
Chr1	3385125	G>A	Missense	OsKitaake01g044900
Chr1	3389425	G>T	Missense	OsKitaake01g045000
Chr1	3389520	C>T	Missense	OsKitaake01g045000
Chr1	3389618	T>C	Missense	OsKitaake01g045000
Chr1	3391039	G>A	Missense	OsKitaake01g045000
Chr1	3391529	C>T	Missense	OsKitaake01g045000
Chr1	3395180	C>A	Missense	OsKitaake01g045100
Chr1	3395705	T>A	Missense	OsKitaake01g045100
Chr1	3399145	G>A	Missense	OsKitaake01g045200
Chr1	3399146	A>G	Missense	OsKitaake01g045200
Chr1	3405753	C>T	Missense	OsKitaake01g045300
Chr1	3406049	G>T	Missense	OsKitaake01g045300
Chr1	3406931	C>T	Missense	OsKitaake01g045300
Chr1	3406932	A>G	Missense	OsKitaake01g045300
Chr1	3406970	G>A	Missense	OsKitaake01g045300
Chr1	3408660	G>A	Missense	OsKitaake01g045300
Chr1	3408678	G>C	Missense	OsKitaake01g045300
Chr1	3408717	G>T	Missense	OsKitaake01g045300
Chr1	3409452	T>C	Missense	OsKitaake01g045300
Chr1	3409488	T>C	Missense	OsKitaake01g045300
Chr1	3410192	A>G	Missense	OsKitaake01g045300
Chr1	3410377	T>C	Missense	OsKitaake01g045300
Chr1	3410560	C>T	Missense	OsKitaake01g045300
Chr1	3410857	T>C	Missense	OsKitaake01g045300
Chr1	3411759	A>G	Missense	OsKitaake01g045300
Chr1	3412006	C>A	Missense	OsKitaake01g045300
Chr1	3412587	T>C	Missense	OsKitaake01g045300
Chr1	3413251	A>C	Missense	OsKitaake01g045300
Chr1	3413663	C>T	Missense	OsKitaake01g045300
Chr1	3413997	C>T	Missense	OsKitaake01g045300
Chr1	3414645	A>G	Missense	OsKitaake01g045300
Chr1	3414775	C>G	Missense	OsKitaake01g045300
Chr1	3415142	T>G	Missense	OsKitaake01g045300
Chr1	3415151	G>A	Missense	OsKitaake01g045300
Chr1	3448018	C>G	Missense	OsKitaake01g045500
Chr1	3451342	C>T	Missense	OsKitaake01g045600
Chr1	3469992	G>C	Missense	OsKitaake01g046000
Chr1	3470010	G>C	Missense	OsKitaake01g046000
Chr1	3470344	G>A	Missense	OsKitaake01g046000
Chr1	3470347	G>A	Missense	OsKitaake01g046000
Chr1	3470455	C>T	Missense	OsKitaake01g046000
Chr1	3470656	G>A	Missense	OsKitaake01g046000
Chr1	3470658	G>A	Missense	OsKitaake01g046000
Chr1	3470818	T>C	Missense	OsKitaake01g046000
Chr1	3471080	G>C	Missense	OsKitaake01g046000
Chr1	3476480	G>C	Missense	OsKitaake01g046008
Chr1	3476559	A>T	Missense	OsKitaake01g046008
Chr1	3487564	A>G	Missense	OsKitaake01g046300
Chr1	3490647	G>T	Missense	OsKitaake01g046400
Chr1	3490731	A>G	Missense	OsKitaake01g046400
Chr1	3491583	C>T	Missense	OsKitaake01g046400
Chr1	3521910	T>C	Missense	OsKitaake01g046900
Chr1	3522508	G>T	Missense	OsKitaake01g046900
Chr1	3522886	C>A	Missense	OsKitaake01g046900
Chr1	3523203	C>T	Missense	OsKitaake01g046900
Chr1	3523353	T>G	Missense	OsKitaake01g046900
Chr1	3523674	T>A	Missense	OsKitaake01g046900
Chr1	3523724	T>C	Missense	OsKitaake01g046900
Chr1	3524142	A>C	Missense	OsKitaake01g046900
Chr1	3526264	A>G	Splice donor	OsKitaake01g046908
Chr1	3534906	T>G	Missense	OsKitaake01g047000
Chr1	3535124	A>G	Missense	OsKitaake01g047000
Chr1	3547133	G>T	Missense	OsKitaake01g047300
Chr1	3547360	A>C	Missense	OsKitaake01g047300
Chr1	3547447	T>A	Missense	OsKitaake01g047300
Chr1	3547587	G>T	Missense	OsKitaake01g047300
Chr1	3547766	T>C	Missense	OsKitaake01g047300
Chr1	3547814	T>C	Missense	OsKitaake01g047300
Chr1	3549463	T>G	Missense	OsKitaake01g047300
Chr1	3551999	G>T	Missense	OsKitaake01g047300
Chr1	3553101	T>C	Missense	OsKitaake01g047300
Chr1	3555015	A>G	Missense	OsKitaake01g047400
Chr1	3556054	C>T	Missense	OsKitaake01g047400
Chr1	3556308	A>G	Missense	OsKitaake01g047400
Chr1	3556374	G>A	Missense	OsKitaake01g047400
Chr1	3556593	G>A	Missense	OsKitaake01g047400
Chr1	3563229	C>A	Missense	OsKitaake01g047500
Chr1	3563730	T>G	Missense	OsKitaake01g047500
Chr1	3568954	A>G	Missense	OsKitaake01g047700
Chr1	3569624	T>C	Missense	OsKitaake01g047700
Chr1	3582615	T>C	Missense	OsKitaake01g048000
Chr1	3584083	A>C	Missense	OsKitaake01g048000
Chr1	3585481	A>G	Missense	OsKitaake01g048000
Chr1	3593173	A>G	Missense	OsKitaake01g048100
Chr1	3594844	T>C	Missense	OsKitaake01g048200
Chr1	3595182	A>G	Start lost	OsKitaake01g048200
Chr1	3606509	A>C	Missense	OsKitaake01g048500
Chr1	3607784	T>G	Missense	OsKitaake01g048500
Chr1	3610629	G>T	Missense	OsKitaake01g048600
Chr1	3611005	G>C	Missense	OsKitaake01g048600
Chr1	3611008	G>C	Missense	OsKitaake01g048600
Chr1	3622567	C>T	Missense	OsKitaake01g048700
Chr1	3622714	A>G	Missense	OsKitaake01g048700
Chr1	3651457	G>A	Missense	OsKitaake01g049000
Chr1	3660807	C>A	Missense	OsKitaake01g049000
Chr1	3663235	A>C	Missense	OsKitaake01g049000
Chr1	3668049	T>C	Missense	OsKitaake01g049100
Chr1	3681587	G>A	Missense	OsKitaake01g049200
Chr1	3687860	G>A	Missense	OsKitaake01g049300
Chr1	3690443	G>C	Missense	OsKitaake01g049300
Chr1	3690556	T>C	Missense	OsKitaake01g049300
Chr1	3691102	C>T	Missense	OsKitaake01g049300
Chr1	3712116	G>A	Missense	OsKitaake01g049500
Chr1	3712845	C>G	Missense	OsKitaake01g049500
Chr1	3712857	A>G	Missense	OsKitaake01g049500
Chr1	3713802	T>C	Missense	OsKitaake01g049500
Chr1	3713944	A>G	Missense	OsKitaake01g049500
Chr1	3741958	C>A	Missense	OsKitaake01g049900
Chr1	3743957	A>T	Missense	OsKitaake01g049900
Chr1	3744625	T>G	Missense	OsKitaake01g049900
Chr1	3744640	A>G	Missense	OsKitaake01g049900
Chr1	3744895	A>G	Splice acceptor	OsKitaake01g049900
Chr1	3750406	G>A	Missense	OsKitaake01g050000
Chr1	3750452	A>C	Missense	OsKitaake01g050000
Chr1	3751210	C>G	Missense	OsKitaake01g050000
Chr1	3751319	T>G	Missense	OsKitaake01g050000
Chr1	3751424	G>T	Missense	OsKitaake01g050000
Chr1	3767959	A>C	Missense	OsKitaake01g050300
Chr1	3768783	T>C	Missense	OsKitaake01g050300
Chr1	3768814	C>G	Missense	OsKitaake01g050300
Chr1	3772905	T>C	Missense	OsKitaake01g050400
Chr1	3773385	C>A	Splice donor	OsKitaake01g050400
Chr1	3773440	A>G	Missense	OsKitaake01g050400
Chr1	3774604	G>A	Missense	OsKitaake01g050400
Chr1	3774668	A>G	Missense	OsKitaake01g050400
Chr1	3781296	A>G	Missense	OsKitaake01g050700
Chr1	3785478	C>G	Missense	OsKitaake01g050900
Chr1	3787983	C>T	Missense	OsKitaake01g050900
Chr1	3797196	T>A	Missense	OsKitaake01g051100
Chr1	3797914	A>G	Missense	OsKitaake01g051100
Chr1	3801226	A>G	Missense	OsKitaake01g051200
Chr1	3806641	G>A	Missense	OsKitaake01g051300
Chr1	3806653	C>T	Missense	OsKitaake01g051300
Chr1	3816262	C>T	Missense	OsKitaake01g051500
Chr1	3831036	G>T	Missense	OsKitaake01g051800
Chr1	3870658	G>A	Missense	OsKitaake01g052000
Chr1	3870878	C>G	Missense	OsKitaake01g052000
Chr1	3893815	C>T	Missense	OsKitaake01g052200
Chr1	3893836	C>T	Missense	OsKitaake01g052200
Chr1	3894109	C>G	Missense	OsKitaake01g052200
Chr1	3894124	A>T	Missense	OsKitaake01g052200
Chr1	3894135	T>C	Missense	OsKitaake01g052200
Chr1	3894201	G>C	Missense	OsKitaake01g052200
Chr1	3894283	C>G	Missense	OsKitaake01g052200
Chr1	3894295	G>C	Missense	OsKitaake01g052200
Chr1	3894301	T>C	Missense	OsKitaake01g052200
Chr1	3894343	A>G	Missense	OsKitaake01g052200
Chr1	3895120	G>C	Missense	OsKitaake01g052200
Chr1	3895705	A>G	Missense	OsKitaake01g052200
Chr1	3898274	A>G	Missense	OsKitaake01g052200
Chr1	3899198	G>C	Missense	OsKitaake01g052200
Chr1	3901049	A>G	Missense	OsKitaake01g052208
Chr1	3907491	C>T	Missense	OsKitaake01g052400
Chr1	3907545	C>T	Missense	OsKitaake01g052400
Chr1	3907556	C>A	Missense	OsKitaake01g052400
Chr1	3907566	C>T	Missense	OsKitaake01g052400
Chr1	3907571	A>G	Missense	OsKitaake01g052400
Chr1	3907712	G>C	Missense	OsKitaake01g052400
Chr1	3908448	C>T	Stop gained	OsKitaake01g052500
Chr1	3908449	A>T	Missense	OsKitaake01g052500
Chr1	3908500	C>A	Missense	OsKitaake01g052500
Chr1	3908509	C>T	Missense	OsKitaake01g052500
Chr1	3908559	A>C	Missense	OsKitaake01g052500
Chr1	3908564	C>T	Stop gained	OsKitaake01g052500
Chr1	3908572	C>G	Missense	OsKitaake01g052500
Chr1	3908580	T>G	Missense	OsKitaake01g052500
Chr1	3908581	T>C	Missense	OsKitaake01g052500
Chr1	3908658	G>A	Missense	OsKitaake01g052500
Chr1	3908659	G>A	Missense	OsKitaake01g052500
Chr1	3908676	A>G	Missense	OsKitaake01g052500
Chr1	3908680	T>C	Missense	OsKitaake01g052500
Chr1	3909172	C>T	Missense	OsKitaake01g052500
Chr1	3909222	A>C	Missense	OsKitaake01g052500
Chr1	3909254	C>G	Missense	OsKitaake01g052500
Chr1	3909262	G>T	Missense	OsKitaake01g052500
Chr1	3909276	T>A	Missense	OsKitaake01g052500
Chr1	3909512	C>G	Missense	OsKitaake01g052600
Chr1	3909541	T>C	Missense	OsKitaake01g052600
Chr1	3910187	A>C	Missense	OsKitaake01g052600
Chr1	3911409	C>T	Missense	OsKitaake01g052600
Chr1	3913132	C>T	Missense	OsKitaake01g052600
Chr1	3913249	G>A	Missense	OsKitaake01g052600
Chr1	3913289	T>C	Missense	OsKitaake01g052600
Chr1	3916428	T>G	Missense	OsKitaake01g052700
Chr1	3916433	A>C	Missense	OsKitaake01g052700
Chr1	3916447	T>G	Missense	OsKitaake01g052700
Chr1	3916518	G>A	Missense	OsKitaake01g052700
Chr1	3916552	T>G	Missense	OsKitaake01g052700
Chr1	3916823	C>T	Missense	OsKitaake01g052700
Chr1	3916843	T>A	Missense	OsKitaake01g052700
Chr1	3916848	G>C	Missense	OsKitaake01g052700
Chr1	3916854	C>G	Missense	OsKitaake01g052700
Chr1	3916888	T>G	Missense	OsKitaake01g052700
Chr1	3916920	C>T	Missense	OsKitaake01g052700
Chr1	3917494	C>A	Missense	OsKitaake01g052700
Chr1	3917597	A>G	Missense	OsKitaake01g052700
Chr1	3919233	T>C	Missense	OsKitaake01g052700
Chr1	3919269	T>C	Missense	OsKitaake01g052700
Chr1	3919302	C>A	Stop gained	OsKitaake01g052700
Chr1	3920337	A>G	Missense	OsKitaake01g052800
Chr1	3920466	G>C	Missense	OsKitaake01g052800
Chr1	3920467	G>C	Missense	OsKitaake01g052800
Chr1	3920469	G>C	Missense	OsKitaake01g052800
Chr1	3920473	C>G	Missense	OsKitaake01g052800
Chr1	3920476	C>G	Missense	OsKitaake01g052800
Chr1	3920482	A>C	Missense	OsKitaake01g052800
Chr1	3920665	A>G	Missense	OsKitaake01g052800
Chr1	3920666	C>A	Missense	OsKitaake01g052800
Chr1	3924585	T>C	Missense	OsKitaake01g052900
Chr1	3924632	G>A	Missense	OsKitaake01g052900
Chr1	3924765	G>T	Missense	OsKitaake01g052900
Chr1	3924939	A>G	Missense	OsKitaake01g052900
Chr1	3925283	G>C	Missense	OsKitaake01g052900
Chr1	3925292	C>T	Missense	OsKitaake01g052900
Chr1	3926019	C>T	Missense	OsKitaake01g052900
Chr1	3926472	G>A	Missense	OsKitaake01g052900
Chr1	3932961	C>T	Missense	OsKitaake01g053000
Chr1	3932984	A>T	Missense	OsKitaake01g053000
Chr1	3932986	G>C	Missense	OsKitaake01g053000
Chr1	3932989	G>A	Missense	OsKitaake01g053000
Chr1	3932990	T>A	Missense	OsKitaake01g053000
Chr1	3933094	A>G	Missense	OsKitaake01g053000
Chr1	3933313	G>A	Missense	OsKitaake01g053000
Chr1	3934203	G>T	Missense	OsKitaake01g053000
Chr1	3936640	C>G	Missense	OsKitaake01g053100
Chr1	3962327	A>G	Missense	OsKitaake01g053400
Chr1	3962340	T>C	Missense	OsKitaake01g053400
Chr1	3964994	A>G	Missense	OsKitaake01g053500
Chr1	3965163	T>C	Missense	OsKitaake01g053500
Chr1	3965567	G>T	Missense	OsKitaake01g053500
Chr1	3965604	G>A	Missense	OsKitaake01g053500
Chr1	3965642	A>C	Missense	OsKitaake01g053500
Chr1	3965762	C>G	Missense	OsKitaake01g053500
Chr1	3965775	C>T	Missense	OsKitaake01g053500
Chr1	3965883	A>G	Missense	OsKitaake01g053500
Chr1	3965906	A>G	Missense	OsKitaake01g053500
Chr1	3965913	A>G	Missense	OsKitaake01g053500
Chr1	3966013	T>A	Missense	OsKitaake01g053500
Chr1	3966039	A>G	Missense	OsKitaake01g053500
Chr1	3966107	T>C	Missense	OsKitaake01g053500
Chr1	3966108	A>G	Missense	OsKitaake01g053500
Chr1	3966183	A>T	Missense	OsKitaake01g053500
Chr1	3967406	T>G	Missense	OsKitaake01g053600
Chr1	3967411	T>A	Missense	OsKitaake01g053600
Chr1	3967734	G>A	Missense	OsKitaake01g053600
Chr1	3967755	T>C	Missense	OsKitaake01g053600
Chr1	3967836	T>C	Missense	OsKitaake01g053600
Chr1	3968432	T>C	Missense	OsKitaake01g053600
Chr1	3968634	A>T	Missense	OsKitaake01g053600
Chr1	3968658	G>T	Missense	OsKitaake01g053600
Chr1	3968661	C>T	Missense	OsKitaake01g053600
Chr1	3968678	T>A	Missense	OsKitaake01g053600
Chr1	3969108	G>T	Missense	OsKitaake01g053600
Chr1	3969109	T>G	Missense	OsKitaake01g053600
Chr1	3969912	T>C	Missense	OsKitaake01g053600
Chr1	3970244	A>C	Missense	OsKitaake01g053600
Chr1	3971609	T>C	Missense	OsKitaake01g053600
Chr1	3971801	G>A	Missense	OsKitaake01g053600
Chr1	3971875	A>G	Missense	OsKitaake01g053600
Chr1	3971886	T>A	Missense	OsKitaake01g053600
Chr1	3983350	A>C	Missense	OsKitaake01g053700
Chr1	3984136	G>A	Missense	OsKitaake01g053700
Chr1	3984624	A>C	Missense	OsKitaake01g053700
Chr1	3984635	A>C	Missense	OsKitaake01g053700
Chr1	3987075	G>T	Missense	OsKitaake01g053700
Chr1	4003292	G>A	Missense	OsKitaake01g053800
Chr1	4004172	A>G	Missense	OsKitaake01g053800
Chr1	4004226	C>G	Missense	OsKitaake01g053800
Chr1	4004376	C>T	Missense	OsKitaake01g053800
Chr1	4004569	T>C	Missense	OsKitaake01g053800
Chr1	4004599	C>T	Missense	OsKitaake01g053800
Chr1	4004739	T>C	Missense	OsKitaake01g053800
Chr1	4004764	T>C	Missense	OsKitaake01g053800
Chr1	4004965	A>C	Missense	OsKitaake01g053800
Chr1	4004997	T>A	Missense	OsKitaake01g053800
Chr1	4005219	C>G	Missense	OsKitaake01g053800
Chr1	4005223	C>G	Missense	OsKitaake01g053800
[truncated: 67,617 more rows]

## Sheet: InDel-genes
Additional file 5 Comparative genomic analysis between KitaakeX and Zhenshan97
Chromosome	Position	Size (bp)	Variation Type	Effect	Gene ID
Chr1	223315	9	Deletion	Inframe deletion	OsKitaake01g003100
Chr1	241100	33	Deletion	Inframe deletion	OsKitaake01g003600
Chr1	256575	1	Deletion	Frameshift	OsKitaake01g003700
Chr1	256585	5	Deletion	Frameshift	OsKitaake01g003700
Chr1	285314	6	Deletion	Inframe deletion	OsKitaake01g004000
Chr1	285469	2	Deletion	Frameshift	OsKitaake01g004000
Chr1	285477	2	Deletion	Frameshift	OsKitaake01g004000
Chr1	285482	2	Deletion	Frameshift	OsKitaake01g004000
Chr1	285506	6	Deletion	Inframe deletion	OsKitaake01g004000
Chr1	285612	15	Deletion	Inframe deletion	OsKitaake01g004000
Chr1	347504	12	Deletion	Inframe deletion	OsKitaake01g005100
Chr1	347714	9	Deletion	Inframe deletion	OsKitaake01g005100
Chr1	347970	18	Deletion	Inframe deletion	OsKitaake01g005100
Chr1	398135	12	Deletion	Inframe deletion	OsKitaake01g005500
Chr1	427542	3	Deletion	Inframe deletion	OsKitaake01g006000
Chr1	434961	6	Deletion	Inframe deletion	OsKitaake01g006100
Chr1	452465	8	Deletion	Frameshift	OsKitaake01g006400
Chr1	452483	1	Deletion	Frameshift	OsKitaake01g006400
Chr1	452734	3	Deletion	Inframe deletion	OsKitaake01g006400
Chr1	470456	15	Deletion	Inframe deletion	OsKitaake01g006600
Chr1	470492	12	Deletion	Inframe deletion	OsKitaake01g006600
Chr1	471511	3	Deletion	Inframe deletion	OsKitaake01g006600
Chr1	471557	4	Deletion	Frameshift	OsKitaake01g006600
Chr1	471563	2	Deletion	Frameshift	OsKitaake01g006600
Chr1	527085	3	Deletion	Inframe deletion	OsKitaake01g115600
Chr1	633067	12	Deletion	Inframe deletion	OsKitaake01g113600
Chr1	667230	9	Deletion	Inframe deletion	OsKitaake01g113000
Chr1	674892	6	Deletion	Inframe deletion	OsKitaake01g112800
Chr1	680031	3	Deletion	Inframe deletion	OsKitaake01g112700
Chr1	718258	12	Deletion	Inframe deletion	OsKitaake01g006800
Chr1	748699	1	Deletion	Frameshift	OsKitaake01g007300
Chr1	748701	1	Deletion	Frameshift	OsKitaake01g007300
Chr1	748705	15	Deletion	Inframe deletion	OsKitaake01g007300
Chr1	764796	3	Deletion	Inframe deletion	OsKitaake01g007800
Chr1	817136	3	Deletion	Inframe deletion	OsKitaake01g008908
Chr1	870803	4	Deletion	Frameshift	OsKitaake01g009500
Chr1	874316	2	Deletion	Frameshift	OsKitaake01g009600
Chr1	884612	35	Deletion	Frameshift	OsKitaake01g009800
Chr1	884955	3	Deletion	Inframe deletion	OsKitaake01g009800
Chr1	890586	1	Deletion	Frameshift	OsKitaake01g010000
Chr1	905034	1	Deletion	Frameshift	OsKitaake01g010400
Chr1	962648	15	Deletion	Inframe deletion	OsKitaake01g010908
Chr1	962664	4	Deletion	Frameshift	OsKitaake01g010908
Chr1	962733	17	Deletion	Frameshift	OsKitaake01g010908
Chr1	962785	4	Deletion	Frameshift	OsKitaake01g010908
Chr1	968336	9	Deletion	Inframe deletion	OsKitaake01g011100
Chr1	970931	58	Deletion	Frameshift	OsKitaake01g011200
Chr1	995704	3	Deletion	Inframe deletion	OsKitaake01g011500
Chr1	995748	6	Deletion	Inframe deletion	OsKitaake01g011500
Chr1	996074	6	Deletion	Inframe deletion	OsKitaake01g011500
Chr1	998880	2	Deletion	Frameshift	OsKitaake01g011500
Chr1	999152	1	Deletion	Frameshift	OsKitaake01g011500
Chr1	1046018	3	Deletion	Inframe deletion	OsKitaake01g012400
Chr1	1083071	5	Deletion	Splice acceptor	OsKitaake01g012700
Chr1	1101322	1	Deletion	Frameshift	OsKitaake01g012900
Chr1	1108543	1	Deletion	Frameshift	OsKitaake01g013000
Chr1	1159955	2	Deletion	Frameshift	OsKitaake01g013500
Chr1	1159992	1	Deletion	Frameshift	OsKitaake01g013600
Chr1	1160124	13	Deletion	Frameshift	OsKitaake01g013600
Chr1	1160138	1	Deletion	Frameshift	OsKitaake01g013600
Chr1	1358607	1	Deletion	Frameshift	OsKitaake01g015808
Chr1	1399286	3	Deletion	Inframe deletion	OsKitaake01g017000
Chr1	1432637	9	Deletion	Inframe deletion	OsKitaake01g017700
Chr1	1432676	5	Deletion	Frameshift	OsKitaake01g017700
Chr1	1432684	1	Deletion	Frameshift	OsKitaake01g017700
Chr1	1432754	1	Deletion	Frameshift	OsKitaake01g017700
Chr1	1432756	1	Deletion	Frameshift	OsKitaake01g017700
Chr1	1432758	1	Deletion	Frameshift	OsKitaake01g017700
Chr1	1432763	3	Deletion	Inframe deletion	OsKitaake01g017700
Chr1	1548800	1	Deletion	Frameshift	OsKitaake01g018700
Chr1	1572236	5	Deletion	Frameshift	OsKitaake01g019300
Chr1	1572280	1	Deletion	Frameshift	OsKitaake01g019300
Chr1	1572320	6	Deletion	Inframe deletion	OsKitaake01g019300
Chr1	1572540	15	Deletion	Inframe deletion	OsKitaake01g019300
Chr1	1572560	6	Deletion	Inframe deletion	OsKitaake01g019300
Chr1	1575134	6	Deletion	Inframe deletion	OsKitaake01g019400
Chr1	1578140	6	Deletion	Inframe deletion	OsKitaake01g019400
Chr1	1821183	14	Deletion	Frameshift	OsKitaake01g021800
Chr1	1823238	4	Deletion	Frameshift	OsKitaake01g021800
Chr1	1825123	6	Deletion	Inframe deletion	OsKitaake01g021800
Chr1	1825275	15	Deletion	Inframe deletion	OsKitaake01g021800
Chr1	1825292	9	Deletion	Inframe deletion	OsKitaake01g021800
Chr1	1825307	11	Deletion	Frameshift	OsKitaake01g021800
Chr1	1832690	6	Deletion	Inframe deletion	OsKitaake01g022000
Chr1	2013312	1	Deletion	Frameshift	OsKitaake01g024700
Chr1	2013322	1	Deletion	Frameshift	OsKitaake01g024700
Chr1	2019194	2	Deletion	Frameshift	OsKitaake01g024900
Chr1	2019199	1	Deletion	Frameshift	OsKitaake01g024900
Chr1	2022810	3	Deletion	Inframe deletion	OsKitaake01g024800
Chr1	2022818	1	Deletion	Frameshift	OsKitaake01g024800
Chr1	2022820	2	Deletion	Frameshift	OsKitaake01g024800
Chr1	2022824	3	Deletion	Inframe deletion	OsKitaake01g024800
Chr1	2022834	8	Deletion	Frameshift	OsKitaake01g024800
Chr1	2022843	1	Deletion	Frameshift	OsKitaake01g024800
Chr1	2051273	3	Deletion	Inframe deletion	OsKitaake01g025600
Chr1	2052255	3	Deletion	Inframe deletion	OsKitaake01g025600
Chr1	2071087	9	Deletion	Inframe deletion	OsKitaake01g026000
Chr1	2073673	1	Deletion	Frameshift	OsKitaake01g026000
Chr1	2131875	1	Deletion	Frameshift	OsKitaake01g026800
Chr1	2132092	9	Deletion	Inframe deletion	OsKitaake01g026800
Chr1	2145248	3	Deletion	Inframe deletion	OsKitaake01g027100
Chr1	2213956	1	Deletion	Frameshift	OsKitaake01g027800
Chr1	2285260	12	Deletion	Inframe deletion	OsKitaake01g028200
Chr1	2285730	3	Deletion	Inframe deletion	OsKitaake01g028200
Chr1	2310515	3	Deletion	Inframe deletion	OsKitaake01g028500
Chr1	2455382	3	Deletion	Inframe deletion	OsKitaake01g031000
Chr1	2456945	3	Deletion	Inframe deletion	OsKitaake01g031000
Chr1	2514410	3	Deletion	Inframe deletion	OsKitaake01g031900
Chr1	2572388	6	Deletion	Inframe deletion	OsKitaake01g032500
Chr1	2576977	3	Deletion	Inframe deletion	OsKitaake01g032600
Chr1	2578108	1	Deletion	Frameshift	OsKitaake01g032700
Chr1	2578110	5	Deletion	Frameshift	OsKitaake01g032700
Chr1	2578118	3	Deletion	Inframe deletion	OsKitaake01g032700
Chr1	2594681	3	Deletion	Inframe deletion	OsKitaake01g032900
Chr1	2657120	9	Deletion	Inframe deletion	OsKitaake01g033600
Chr1	2701436	17	Deletion	Frameshift	OsKitaake01g033800
Chr1	2722385	3	Deletion	Inframe deletion	OsKitaake01g034116
Chr1	2794349	8	Deletion	Frameshift	OsKitaake01g035200
Chr1	2838940	2	Deletion	Frameshift	OsKitaake01g035908
Chr1	2838949	1	Deletion	Frameshift	OsKitaake01g035908
Chr1	2839100	40	Deletion	Frameshift	OsKitaake01g035908
Chr1	2845077	12	Deletion	Inframe deletion	OsKitaake01g036100
Chr1	2848440	6	Deletion	Inframe deletion	OsKitaake01g036200
Chr1	2848484	8	Deletion	Frameshift	OsKitaake01g036200
Chr1	2848733	3	Deletion	Inframe deletion	OsKitaake01g036200
Chr1	2848764	3	Deletion	Inframe deletion	OsKitaake01g036200
Chr1	2848969	1	Deletion	Frameshift	OsKitaake01g036200
Chr1	2848974	1	Deletion	Frameshift	OsKitaake01g036200
Chr1	2849102	12	Deletion	Inframe deletion	OsKitaake01g036200
Chr1	2943331	4	Deletion	Frameshift	OsKitaake01g037640
Chr1	3047154	1	Deletion	Frameshift	OsKitaake01g038300
Chr1	3178386	9	Deletion	Inframe deletion	OsKitaake01g041500
Chr1	3197655	1	Deletion	Frameshift	OsKitaake01g041700
Chr1	3239877	6	Deletion	Inframe deletion	OsKitaake01g042300
Chr1	3257195	3	Deletion	Inframe deletion	OsKitaake01g042500
Chr1	3259974	3	Deletion	Inframe deletion	OsKitaake01g042700
Chr1	3260207	9	Deletion	Inframe deletion	OsKitaake01g042700
Chr1	3261064	2	Deletion	Frameshift	OsKitaake01g042700
Chr1	3262305	25	Deletion	Frameshift	OsKitaake01g042700
Chr1	3274767	3	Deletion	Inframe deletion	OsKitaake01g042900
Chr1	3275685	1	Deletion	Frameshift	OsKitaake01g042900
Chr1	3300613	1	Deletion	Frameshift	OsKitaake01g043200
Chr1	3318735	2	Deletion	Frameshift	OsKitaake01g043300
Chr1	3318739	1	Deletion	Frameshift	OsKitaake01g043300
Chr1	3319052	3	Deletion	Inframe deletion	OsKitaake01g043300
Chr1	3319394	1	Deletion	Frameshift	OsKitaake01g043300
Chr1	3322242	1	Deletion	Frameshift	OsKitaake01g043300
Chr1	3323364	3	Deletion	Inframe deletion	OsKitaake01g043300
Chr1	3323426	1	Deletion	Frameshift	OsKitaake01g043300
Chr1	3323721	1	Deletion	Frameshift	OsKitaake01g043300
Chr1	3359514	3	Deletion	Inframe deletion	OsKitaake01g044200
Chr1	3359519	3	Deletion	Inframe deletion	OsKitaake01g044200
Chr1	3362137	3	Deletion	Inframe deletion	OsKitaake01g044300
Chr1	3381438	3	Deletion	Inframe deletion	OsKitaake01g044800
Chr1	3381487	1	Deletion	Frameshift	OsKitaake01g044800
Chr1	3383556	3	Deletion	Inframe deletion	OsKitaake01g044900
Chr1	3383670	3	Deletion	Inframe deletion	OsKitaake01g044900
Chr1	3385103	3	Deletion	Inframe deletion	OsKitaake01g044900
Chr1	3476688	3	Deletion	Inframe deletion	OsKitaake01g046008
Chr1	3504924	3	Deletion	Inframe deletion	OsKitaake01g046600
Chr1	3524094	1	Deletion	Frameshift	OsKitaake01g046900
Chr1	3524106	2	Deletion	Frameshift	OsKitaake01g046900
Chr1	3547203	1	Deletion	Frameshift	OsKitaake01g047300
Chr1	3585471	3	Deletion	Inframe deletion	OsKitaake01g048000
Chr1	3590679	6	Deletion	Inframe deletion	OsKitaake01g048100
Chr1	3595009	40	Deletion	Frameshift	OsKitaake01g048200
Chr1	3595052	2	Deletion	Frameshift	OsKitaake01g048200
Chr1	3595055	1	Deletion	Frameshift	OsKitaake01g048200
Chr1	3776196	1	Deletion	Frameshift	OsKitaake01g050400
Chr1	3807320	9	Deletion	Inframe deletion	OsKitaake01g051300
Chr1	3811992	6	Deletion	Inframe deletion	OsKitaake01g051400
Chr1	3894030	3	Deletion	Inframe deletion	OsKitaake01g052200
Chr1	3894375	3	Deletion	Inframe deletion	OsKitaake01g052200
Chr1	3908527	1	Deletion	Frameshift	OsKitaake01g052500
Chr1	3908706	4	Deletion	Frameshift	OsKitaake01g052500
Chr1	3908749	34	Deletion	Frameshift	OsKitaake01g052500
Chr1	3909303	46	Deletion	Frameshift	OsKitaake01g052500
Chr1	3918282	3	Deletion	Inframe deletion	OsKitaake01g052700
Chr1	3919285	4	Deletion	Frameshift	OsKitaake01g052700
Chr1	3920014	6	Deletion	Inframe deletion	OsKitaake01g052800
Chr1	3920393	3	Deletion	Inframe deletion	OsKitaake01g052800
Chr1	3920471	1	Deletion	Frameshift	OsKitaake01g052800
Chr1	3920770	3	Deletion	Inframe deletion	OsKitaake01g052800
Chr1	3924850	3	Deletion	Inframe deletion	OsKitaake01g052900
Chr1	3925120	9	Deletion	Inframe deletion	OsKitaake01g052900
Chr1	3965756	3	Deletion	Inframe deletion	OsKitaake01g053500
Chr1	3965903	3	Deletion	Inframe deletion	OsKitaake01g053500
Chr1	3971313	1	Deletion	Frameshift	OsKitaake01g053600
Chr1	4004540	1	Deletion	Frameshift	OsKitaake01g053800
Chr1	4004543	2	Deletion	Frameshift	OsKitaake01g053800
Chr1	4004552	3	Deletion	Inframe deletion	OsKitaake01g053800
Chr1	4005031	9	Deletion	Inframe deletion	OsKitaake01g053800
Chr1	4014926	12	Deletion	Inframe deletion	OsKitaake01g054100
Chr1	4042906	3	Deletion	Inframe deletion	OsKitaake01g054500
Chr1	4065777	3	Deletion	Inframe deletion	OsKitaake01g054700
Chr1	4152125	6	Deletion	Inframe deletion	OsKitaake01g055200
Chr1	4191988	1	Deletion	Frameshift	OsKitaake01g056008
Chr1	4322954	6	Deletion	Inframe deletion	OsKitaake01g057500
Chr1	4408349	15	Deletion	Inframe deletion	OsKitaake01g058800
Chr1	4484072	35	Deletion	Frameshift	OsKitaake01g059600
Chr1	4517590	1	Deletion	Frameshift	OsKitaake01g060208
Chr1	4517593	1	Deletion	Frameshift	OsKitaake01g060208
Chr1	4517600	1	Deletion	Frameshift	OsKitaake01g060208
Chr1	4523726	6	Deletion	Inframe deletion	OsKitaake01g060300
Chr1	4579997	6	Deletion	Inframe deletion	OsKitaake01g061200
Chr1	4580128	3	Deletion	Inframe deletion	OsKitaake01g061200
Chr1	4580188	5	Deletion	Frameshift	OsKitaake01g061200
Chr1	4580195	3	Deletion	Inframe deletion	OsKitaake01g061200
Chr1	4580199	1	Deletion	Frameshift	OsKitaake01g061200
Chr1	4581575	3	Deletion	Inframe deletion	OsKitaake01g061300
Chr1	4663392	12	Deletion	Inframe deletion	OsKitaake01g062400
Chr1	4744440	3	Deletion	Inframe deletion	OsKitaake01g063208
Chr1	4841385	1	Deletion	Frameshift	OsKitaake01g064700
Chr1	4862470	3	Deletion	Inframe deletion	OsKitaake01g065000
Chr1	4882670	3	Deletion	Inframe deletion	OsKitaake01g065200
Chr1	4887390	3	Deletion	Inframe deletion	OsKitaake01g065300
Chr1	5070695	3	Deletion	Inframe deletion	OsKitaake01g066600
Chr1	5105429	3	Deletion	Inframe deletion	OsKitaake01g067000
Chr1	5107206	1	Deletion	Splice acceptor	OsKitaake01g067100
Chr1	5108326	33	Deletion	Inframe deletion	OsKitaake01g067100
Chr1	5116432	9	Deletion	Inframe deletion	OsKitaake01g067300
Chr1	5128565	3	Deletion	Inframe deletion	OsKitaake01g067500
Chr1	5258257	2	Deletion	Splice acceptor	OsKitaake01g068500
Chr1	5366181	6	Deletion	Inframe deletion	OsKitaake01g069600
Chr1	5493298	9	Deletion	Inframe deletion	OsKitaake01g070600
Chr1	5732225	1	Deletion	Frameshift	OsKitaake01g072800
Chr1	5732228	2	Deletion	Frameshift	OsKitaake01g072800
Chr1	5762799	6	Deletion	Inframe deletion	OsKitaake01g073208
Chr1	5819892	3	Deletion	Inframe deletion	OsKitaake01g073608
Chr1	5820416	2	Deletion	Frameshift	OsKitaake01g073608
Chr1	5826542	3	Deletion	Inframe deletion	OsKitaake01g073608
Chr1	5846027	3	Deletion	Inframe deletion	OsKitaake01g074000
Chr1	5930623	9	Deletion	Inframe deletion	OsKitaake01g075700
Chr1	5931228	3	Deletion	Inframe deletion	OsKitaake01g075700
Chr1	6199350	6	Deletion	Inframe deletion	OsKitaake01g078800
Chr1	6325727	3	Deletion	Inframe deletion	OsKitaake01g080000
Chr1	6325934	9	Deletion	Inframe deletion	OsKitaake01g080000
Chr1	6350769	1	Deletion	Frameshift	OsKitaake01g080200
Chr1	6400181	6	Deletion	Inframe deletion	OsKitaake01g080900
Chr1	6464733	6	Deletion	Inframe deletion	OsKitaake01g081600
Chr1	6690769	6	Deletion	Inframe deletion	OsKitaake01g084500
Chr1	6748646	8	Deletion	Splice acceptor	OsKitaake01g085000
Chr1	6756786	3	Deletion	Inframe deletion	OsKitaake01g085200
Chr1	6819003	1	Deletion	Frameshift	OsKitaake01g086100
Chr1	6819735	3	Deletion	Inframe deletion	OsKitaake01g086100
Chr1	6819836	3	Deletion	Inframe deletion	OsKitaake01g086100
Chr1	6819852	1	Deletion	Frameshift	OsKitaake01g086100
Chr1	6819856	2	Deletion	Frameshift	OsKitaake01g086100
Chr1	6961564	6	Deletion	Inframe deletion	OsKitaake01g087600
Chr1	7006917	11	Deletion	Frameshift	OsKitaake01g087908
Chr1	7006943	1	Deletion	Frameshift	OsKitaake01g087908
Chr1	7014380	3	Deletion	Inframe deletion	OsKitaake01g088000
Chr1	7050024	4	Deletion	Frameshift	OsKitaake01g088508
Chr1	7050030	2	Deletion	Frameshift	OsKitaake01g088508
Chr1	7050033	11	Deletion	Frameshift	OsKitaake01g088508
Chr1	7050047	13	Deletion	Frameshift	OsKitaake01g088508
Chr1	7050069	30	Deletion	Inframe deletion	OsKitaake01g088508
Chr1	7050128	26	Deletion	Frameshift	OsKitaake01g088508
Chr1	7050155	4	Deletion	Frameshift	OsKitaake01g088508
Chr1	7134661	6	Deletion	Inframe deletion	OsKitaake01g089100
Chr1	7134879	9	Deletion	Inframe deletion	OsKitaake01g089100
Chr1	7151021	1	Deletion	Frameshift	OsKitaake01g089200
Chr1	7151485	1	Deletion	Frameshift	OsKitaake01g089200
Chr1	7153650	1	Deletion	Frameshift	OsKitaake01g089200
Chr1	7174414	3	Deletion	Inframe deletion	OsKitaake01g089500
Chr1	7201604	10	Deletion	Frameshift	OsKitaake01g090000
Chr1	7201616	2	Deletion	Frameshift	OsKitaake01g090000
Chr1	7201640	6	Deletion	Inframe deletion	OsKitaake01g090000
Chr1	7202141	6	Deletion	Inframe deletion	OsKitaake01g090000
Chr1	7202955	9	Deletion	Inframe deletion	OsKitaake01g090000
Chr1	7217131	10	Deletion	Frameshift	OsKitaake01g090300
Chr1	7217276	1	Deletion	Frameshift	OsKitaake01g090300
Chr1	7220147	6	Deletion	Inframe deletion	OsKitaake01g090400
Chr1	7222241	2	Deletion	Frameshift	OsKitaake01g090500
Chr1	7222244	7	Deletion	Frameshift	OsKitaake01g090500
Chr1	7222415	3	Deletion	Inframe deletion	OsKitaake01g090500
Chr1	7222465	3	Deletion	Inframe deletion	OsKitaake01g090500
Chr1	7225481	1	Deletion	Frameshift	OsKitaake01g090600
Chr1	7253771	3	Deletion	Inframe deletion	OsKitaake01g090900
Chr1	7302840	3	Deletion	Inframe deletion	OsKitaake01g091408
Chr1	7342121	12	Deletion	Inframe deletion	OsKitaake01g092000
Chr1	7385173	6	Deletion	Inframe deletion	OsKitaake01g092300
Chr1	7505226	3	Deletion	Inframe deletion	OsKitaake01g093900
Chr1	7506380	12	Deletion	Start lost	OsKitaake01g093900
Chr1	7518835	3	Deletion	Inframe deletion	OsKitaake01g094100
Chr1	7518875	3	Deletion	Inframe deletion	OsKitaake01g094100
Chr1	7818585	18	Deletion	Inframe deletion	OsKitaake01g098100
Chr1	7898378	1	Deletion	Frameshift	OsKitaake01g099100
Chr1	8806371	2	Deletion	Splice donor	OsKitaake01g110000
Chr1	8889159	15	Deletion	Inframe deletion	OsKitaake01g111000
Chr1	8923035	2	Deletion	Frameshift	OsKitaake01g111500
Chr1	8923149	2	Deletion	Frameshift	OsKitaake01g111500
Chr1	8948804	5	Deletion	Frameshift	OsKitaake01g111808
Chr1	8948902	3	Deletion	Inframe deletion	OsKitaake01g111808
Chr1	8949241	1	Deletion	Frameshift	OsKitaake01g111808
Chr1	8949291	5	Deletion	Frameshift	OsKitaake01g111808
Chr1	8949301	3	Deletion	Inframe deletion	OsKitaake01g111808
Chr1	8949305	1	Deletion	Frameshift	OsKitaake01g111808
Chr1	8949471	1	Deletion	Frameshift	OsKitaake01g111808
Chr1	8949474	2	Deletion	Frameshift	OsKitaake01g111808
Chr1	8971241	1	Deletion	Frameshift	OsKitaake01g112200
Chr1	8971734	3	Deletion	Inframe deletion	OsKitaake01g112200
Chr1	9076172	2	Deletion	Frameshift	OsKitaake01g116800
Chr1	9076175	1	Deletion	Frameshift	OsKitaake01g116800
Chr1	9096668	6	Deletion	Inframe deletion	OsKitaake01g116900
Chr1	9400283	2	Deletion	Frameshift	OsKitaake01g120400
Chr1	9400286	1	Deletion	Frameshift	OsKitaake01g120400
Chr1	9410517	9	Deletion	Inframe deletion	OsKitaake01g120700
Chr1	9447953	11	Deletion	Frameshift	OsKitaake01g121200
Chr1	9519111	1	Deletion	Frameshift	OsKitaake01g121800
Chr1	9519114	2	Deletion	Frameshift	OsKitaake01g121800
Chr1	9598377	2	Deletion	Frameshift	OsKitaake01g123066
Chr1	9923862	6	Deletion	Inframe deletion	OsKitaake01g125800
Chr1	9928988	28	Deletion	Frameshift	OsKitaake01g125900
Chr1	9977754	3	Deletion	Inframe deletion	OsKitaake01g126300
Chr1	10022204	9	Deletion	Inframe deletion	OsKitaake01g126600
Chr1	10025217	12	Deletion	Inframe deletion	OsKitaake01g126600
Chr1	10310891	6	Deletion	Inframe deletion	OsKitaake01g129300
Chr1	10496700	1	Deletion	Frameshift	OsKitaake01g131150
Chr1	10514767	2	Deletion	Frameshift	OsKitaake01g131300
Chr1	10530066	2	Deletion	Frameshift	OsKitaake01g131600
Chr1	10643747	12	Deletion	Inframe deletion	OsKitaake01g132100
Chr1	10836931	3	Deletion	Inframe deletion	OsKitaake01g133700
Chr1	10884861	2	Deletion	Frameshift	OsKitaake01g134300
Chr1	10884864	1	Deletion	Frameshift	OsKitaake01g134300
Chr1	10884869	6	Deletion	Inframe deletion	OsKitaake01g134300
Chr1	11079409	6	Deletion	Inframe deletion	OsKitaake01g136100
Chr1	11110552	84	Deletion	Frameshift	OsKitaake01g136500
Chr1	11244248	13	Deletion	Frameshift	OsKitaake01g138100
Chr1	11321774	2	Deletion	Frameshift	OsKitaake01g138600
Chr1	11875124	3	Deletion	Inframe deletion	OsKitaake01g146200
Chr1	11984388	6	Deletion	Inframe deletion	OsKitaake01g147000
Chr1	11984401	66	Deletion	Inframe deletion	OsKitaake01g147000
Chr1	12443918	9	Deletion	Inframe deletion	OsKitaake01g150100
Chr1	12752462	9	Deletion	Inframe deletion	OsKitaake01g152100
Chr1	12752489	3	Deletion	Inframe deletion	OsKitaake01g152100
Chr1	12761098	3	Deletion	Inframe deletion	OsKitaake01g152200
Chr1	12764811	9	Deletion	Inframe deletion	OsKitaake01g152200
Chr1	12905969	12	Deletion	Inframe deletion	OsKitaake01g154000
Chr1	12956119	3	Deletion	Inframe deletion	OsKitaake01g154700
Chr1	12963202	9	Deletion	Inframe deletion	OsKitaake01g154800
Chr1	12963212	5	Deletion	Frameshift	OsKitaake01g154800
Chr1	13074486	3	Deletion	Inframe deletion	OsKitaake01g155100
Chr1	13192692	1	Deletion	Frameshift	OsKitaake01g155600
Chr1	13192753	1	Deletion	Frameshift	OsKitaake01g155600
Chr1	13454825	1	Deletion	Frameshift	OsKitaake01g156500
Chr1	13501995	4	Deletion	Splice donor	OsKitaake01g156900
Chr1	13553036	3	Deletion	Inframe deletion	OsKitaake01g157200
Chr1	13577413	3	Deletion	Inframe deletion	OsKitaake01g157800
Chr1	13653573	9	Deletion	Inframe deletion	OsKitaake01g158900
Chr1	13873964	2	Deletion	Frameshift	OsKitaake01g160400
Chr1	13873967	7	Deletion	Frameshift	OsKitaake01g160400
Chr1	13873975	6	Deletion	Inframe deletion	OsKitaake01g160400
Chr1	13982074	21	Deletion	Inframe deletion	OsKitaake01g160700
Chr1	13987006	3	Deletion	Inframe deletion	OsKitaake01g160800
Chr1	13987015	6	Deletion	Inframe deletion	OsKitaake01g160800
Chr1	13987300	1	Deletion	Frameshift	OsKitaake01g160800
Chr1	14018757	3	Deletion	Inframe deletion	OsKitaake01g161400
Chr1	14018788	8	Deletion	Frameshift	OsKitaake01g161400
Chr1	14018800	4	Deletion	Frameshift	OsKitaake01g161400
Chr1	14018871	1	Deletion	Frameshift	OsKitaake01g161400
Chr1	14018874	4	Deletion	Frameshift	OsKitaake01g161400
Chr1	14018879	6	Deletion	Inframe deletion	OsKitaake01g161400
Chr1	14018889	1	Deletion	Frameshift	OsKitaake01g161400
Chr1	14018897	1	Deletion	Frameshift	OsKitaake01g161400
Chr1	14018903	12	Deletion	Inframe deletion	OsKitaake01g161400
Chr1	14018918	5	Deletion	Frameshift	OsKitaake01g161400
Chr1	14260691	1	Deletion	Frameshift	OsKitaake01g163000
Chr1	14312265	3	Deletion	Inframe deletion	OsKitaake01g163300
Chr1	14526121	1	Deletion	Frameshift	OsKitaake01g164950
Chr1	14526155	1	Deletion	Frameshift	OsKitaake01g164950
Chr1	14561536	6	Deletion	Inframe deletion	OsKitaake01g165300
Chr1	14564707	3	Deletion	Inframe deletion	OsKitaake01g165300
Chr1	14564909	6	Deletion	Inframe deletion	OsKitaake01g165300
Chr1	14584954	4	Deletion	Splice acceptor	OsKitaake01g165600
Chr1	14588306	1	Deletion	Frameshift	OsKitaake01g165700
Chr1	14618893	3	Deletion	Inframe deletion	OsKitaake01g165900
Chr1	14714629	9	Deletion	Inframe deletion	OsKitaake01g166500
Chr1	14723674	1	Deletion	Frameshift	OsKitaake01g166700
Chr1	14743905	1	Deletion	Frameshift	OsKitaake01g166950
Chr1	14743907	5	Deletion	Frameshift	OsKitaake01g166950
Chr1	14743916	1	Deletion	Frameshift	OsKitaake01g166950
Chr1	14743918	1	Deletion	Frameshift	OsKitaake01g166950
Chr1	14749072	4	Deletion	Splice acceptor	OsKitaake01g167000
Chr1	14792501	1	Deletion	Frameshift	OsKitaake01g167300
Chr1	14793876	2	Deletion	Frameshift	OsKitaake01g167400
Chr1	14865892	1	Deletion	Frameshift	OsKitaake01g141550
Chr1	14877706	7	Deletion	Frameshift	OsKitaake01g141700
Chr1	15183829	16	Deletion	Frameshift	OsKitaake01g144400
Chr1	15192346	3	Deletion	Inframe deletion	OsKitaake01g144500
Chr1	15198107	1	Deletion	Frameshift	OsKitaake01g144500
Chr1	15469750	7	Deletion	Frameshift	OsKitaake01g169100
Chr1	15469758	2	Deletion	Frameshift	OsKitaake01g169100
Chr1	15502126	4	Deletion	Frameshift	OsKitaake01g169600
Chr1	15613934	3	Deletion	Inframe deletion	OsKitaake01g170200
Chr1	15659631	5	Deletion	Frameshift	OsKitaake01g170400
Chr1	15777024	3	Deletion	Inframe deletion	OsKitaake01g172100
Chr1	15877768	1	Deletion	Frameshift	OsKitaake01g172700
Chr1	15906064	10	Deletion	Frameshift	OsKitaake01g173100
Chr1	15906075	2	Deletion	Frameshift	OsKitaake01g173100
Chr1	15906079	2	Deletion	Frameshift	OsKitaake01g173100
Chr1	15906082	3	Deletion	Inframe deletion	OsKitaake01g173100
Chr1	15972038	4	Deletion	Splice acceptor	OsKitaake01g173300
Chr1	16046851	1	Deletion	Frameshift	OsKitaake01g173800
Chr1	16046853	2	Deletion	Frameshift	OsKitaake01g173800
Chr1	16046918	9	Deletion	Inframe deletion	OsKitaake01g173800
Chr1	16047176	1	Deletion	Frameshift	OsKitaake01g173800
Chr1	16102471	2	Deletion	Frameshift	OsKitaake01g174300
Chr1	16102475	2	Deletion	Frameshift	OsKitaake01g174300
Chr1	16102478	4	Deletion	Frameshift	OsKitaake01g174300
Chr1	16158691	5	Deletion	Frameshift	OsKitaake01g174600
Chr1	16294394	3	Deletion	Inframe deletion	OsKitaake01g175300
Chr1	16294634	1	Deletion	Frameshift	OsKitaake01g175300
Chr1	16302872	15	Deletion	Inframe deletion	OsKitaake01g175500
Chr1	16414260	3	Deletion	Inframe deletion	OsKitaake01g176300
Chr1	16938082	20	Deletion	Frameshift	OsKitaake01g182801
Chr1	16938257	1	Deletion	Frameshift	OsKitaake01g182801
Chr1	17591892	16	Deletion	Frameshift	OsKitaake01g179700
Chr1	17638218	4	Deletion	Frameshift	OsKitaake01g180000
Chr1	18257292	3	Deletion	Inframe deletion	OsKitaake01g183350
Chr1	18381355	12	Deletion	Inframe deletion	OsKitaake01g184500
Chr1	18394458	1	Deletion	Frameshift	OsKitaake01g184700
Chr1	18735876	1	Deletion	Frameshift	OsKitaake01g188300
Chr1	18736672	1	Deletion	Frameshift	OsKitaake01g188300
Chr1	18770440	1	Deletion	Frameshift	OsKitaake01g188700
Chr1	18770577	13	Deletion	Frameshift	OsKitaake01g188700
Chr1	18771088	13	Deletion	Frameshift	OsKitaake01g188700
Chr1	18804936	7	Deletion	Frameshift	OsKitaake01g188920
Chr1	18828435	1	Deletion	Frameshift	OsKitaake01g189300
Chr1	18828513	6	Deletion	Inframe deletion	OsKitaake01g189300
Chr1	18828711	1	Deletion	Frameshift	OsKitaake01g189300
Chr1	18876821	1	Deletion	Frameshift	OsKitaake01g189600
Chr1	18905615	1	Deletion	Frameshift	OsKitaake01g189900
Chr1	18931091	11	Deletion	Frameshift	OsKitaake01g190100
Chr1	18965770	1	Deletion	Frameshift	OsKitaake01g190500
Chr1	19030250	2	Deletion	Frameshift	OsKitaake01g191150
Chr1	19330494	1	Deletion	Frameshift	OsKitaake01g193200
Chr1	19363803	1	Deletion	Splice acceptor	OsKitaake01g193500
Chr1	19477080	14	Deletion	Splice acceptor	OsKitaake01g194400
Chr1	19544737	2	Deletion	Frameshift	OsKitaake01g195000
Chr1	19544804	1	Deletion	Frameshift	OsKitaake01g195000
Chr1	19609588	1	Deletion	Frameshift	OsKitaake01g195300
Chr1	19822329	1	Deletion	Frameshift	OsKitaake01g197200
Chr1	20463839	1	Deletion	Frameshift	OsKitaake01g200100
Chr1	20598314	24	Deletion	Inframe deletion	OsKitaake01g201100
Chr1	20600809	9	Deletion	Inframe deletion	OsKitaake01g201100
Chr1	20703962	6	Deletion	Inframe deletion	OsKitaake01g202700
Chr1	20703984	3	Deletion	Inframe deletion	OsKitaake01g202700
Chr1	20703989	3	Deletion	Inframe deletion	OsKitaake01g202700
Chr1	20935863	3	Deletion	Inframe deletion	OsKitaake01g205000
Chr1	21050783	3	Deletion	Inframe deletion	OsKitaake01g206100
Chr1	21108880	4	Deletion	Frameshift	OsKitaake01g206500
Chr1	21108886	2	Deletion	Frameshift	OsKitaake01g206500
Chr1	21109010	10	Deletion	Frameshift	OsKitaake01g206500
Chr1	21109023	1	Deletion	Frameshift	OsKitaake01g206500
Chr1	21576938	12	Deletion	Inframe deletion	OsKitaake01g207900
Chr1	21577903	3	Deletion	Inframe deletion	OsKitaake01g207900
Chr1	21731914	1	Deletion	Frameshift	OsKitaake01g209766
Chr1	21733376	9	Deletion	Inframe deletion	OsKitaake01g209800
Chr1	21780219	2	Deletion	Frameshift	OsKitaake01g210000
Chr1	21896491	1	Deletion	Frameshift	OsKitaake01g210900
Chr1	22880903	3	Deletion	Inframe deletion	OsKitaake01g217800
Chr1	22926870	9	Deletion	Inframe deletion	OsKitaake01g218300
Chr1	22996601	13	Deletion	Splice donor	OsKitaake01g219000
Chr1	23007934	7	Deletion	Frameshift	OsKitaake01g219200
Chr1	23007942	2	Deletion	Frameshift	OsKitaake01g219200
Chr1	23096990	1	Deletion	Frameshift	OsKitaake01g220000
Chr1	23132909	24	Deletion	Inframe deletion	OsKitaake01g220500
Chr1	23191435	2	Deletion	Frameshift	OsKitaake01g221600
Chr1	23201505	1	Deletion	Frameshift	OsKitaake01g221900
Chr1	23316002	1	Deletion	Frameshift	OsKitaake01g222900
Chr1	23358997	33	Deletion	Inframe deletion	OsKitaake01g223500
Chr1	23359032	3	Deletion	Inframe deletion	OsKitaake01g223500
Chr1	23359233	10	Deletion	Frameshift	OsKitaake01g223500
Chr1	23415580	3	Deletion	Inframe deletion	OsKitaake01g224000
Chr1	23441369	3	Deletion	Inframe deletion	OsKitaake01g224300
Chr1	23441452	6	Deletion	Inframe deletion	OsKitaake01g224300
Chr1	23441494	9	Deletion	Inframe deletion	OsKitaake01g224300
Chr1	23527130	3	Deletion	Inframe deletion	OsKitaake01g225600
Chr1	23547828	9	Deletion	Inframe deletion	OsKitaake01g226300
Chr1	23638898	1	Deletion	Frameshift	OsKitaake01g226800
Chr1	23748946	24	Deletion	Inframe deletion	OsKitaake01g227900
Chr1	23775966	59	Deletion	Splice acceptor	OsKitaake01g228000
Chr1	23790108	1	Deletion	Frameshift	OsKitaake01g228300
Chr1	23870945	6	Deletion	Inframe deletion	OsKitaake01g229100
Chr1	23870964	12	Deletion	Inframe deletion	OsKitaake01g229100
Chr1	23871089	6	Deletion	Inframe deletion	OsKitaake01g229100
Chr1	23903030	3	Deletion	Inframe deletion	OsKitaake01g229600
Chr1	23904439	3	Deletion	Inframe deletion	OsKitaake01g229600
Chr1	23904476	3	Deletion	Inframe deletion	OsKitaake01g229600
Chr1	23919656	6	Deletion	Inframe deletion	OsKitaake01g229700
Chr1	23931206	3	Deletion	Inframe deletion	OsKitaake01g230000
Chr1	24184501	9	Deletion	Start lost	OsKitaake01g232600
Chr1	24211765	18	Deletion	Inframe deletion	OsKitaake01g233100
Chr1	24220788	1	Deletion	Frameshift	OsKitaake01g233200
Chr1	24220790	1	Deletion	Frameshift	OsKitaake01g233200
Chr1	24220794	1	Deletion	Frameshift	OsKitaake01g233200
Chr1	24220797	1	Deletion	Frameshift	OsKitaake01g233200
Chr1	24220799	2	Deletion	Frameshift	OsKitaake01g233200
Chr1	24240170	1	Deletion	Frameshift	OsKitaake01g233500
Chr1	24329539	1	Deletion	Frameshift	OsKitaake01g234300
Chr1	24603760	12	Deletion	Inframe deletion	OsKitaake01g237700
Chr1	24624367	3	Deletion	Inframe deletion	OsKitaake01g237900
Chr1	24809416	15	Deletion	Inframe deletion	OsKitaake01g239600
Chr1	24978232	6	Deletion	Inframe deletion	OsKitaake01g241300
Chr1	25008152	6	Deletion	Inframe deletion	OsKitaake01g241800
Chr1	25040180	9	Deletion	Inframe deletion	OsKitaake01g242400
Chr1	25040202	2	Deletion	Frameshift	OsKitaake01g242400
Chr1	25120461	1	Deletion	Frameshift	OsKitaake01g242900
Chr1	25207622	15	Deletion	Frameshift	OsKitaake01g243800
Chr1	25244780	3	Deletion	Inframe deletion	OsKitaake01g244500
Chr1	25258633	3	Deletion	Inframe deletion	OsKitaake01g244700
Chr1	25432160	3	Deletion	Inframe deletion	OsKitaake01g246500
Chr1	25459197	2	Deletion	Frameshift	OsKitaake01g246700
Chr1	25512533	12	Deletion	Inframe deletion	OsKitaake01g247533
Chr1	25687657	12	Deletion	Inframe deletion	OsKitaake01g249600
Chr1	25718269	7	Deletion	Frameshift	OsKitaake01g250100
Chr1	25718277	4	Deletion	Frameshift	OsKitaake01g250100
Chr1	25718283	1	Deletion	Frameshift	OsKitaake01g250100
Chr1	25786314	6	Deletion	Inframe deletion	OsKitaake01g250666
Chr1	26188559	1	Deletion	Frameshift	OsKitaake01g255400
Chr1	26307265	12	Deletion	Inframe deletion	OsKitaake01g256400
Chr1	26867020	1	Deletion	Frameshift	OsKitaake01g261100
Chr1	26882836	1	Deletion	Frameshift	OsKitaake01g261400
Chr1	26884117	1	Deletion	Frameshift	OsKitaake01g261400
Chr1	26884159	1	Deletion	Frameshift	OsKitaake01g261400
Chr1	27457685	15	Deletion	Inframe deletion	OsKitaake01g267200
Chr1	27756486	4	Deletion	Frameshift	OsKitaake01g269200
Chr1	27756491	1	Deletion	Frameshift	OsKitaake01g269200
Chr1	27756494	1	Deletion	Frameshift	OsKitaake01g269200
Chr1	27909874	5	Deletion	Frameshift	OsKitaake01g270850
Chr1	28046273	3	Deletion	Inframe deletion	OsKitaake01g272900
Chr1	28295687	15	Deletion	Inframe deletion	OsKitaake01g274400
Chr1	28387706	21	Deletion	Inframe deletion	OsKitaake01g274800
Chr1	28685511	5	Deletion	Frameshift	OsKitaake01g278400
Chr1	28811653	3	Deletion	Inframe deletion	OsKitaake01g279700
Chr1	29127377	3	Deletion	Inframe deletion	OsKitaake01g283200
Chr1	29229440	3	Deletion	Inframe deletion	OsKitaake01g284800
Chr1	29294816	1	Deletion	Frameshift	OsKitaake01g285600
Chr1	29295472	1	Deletion	Frameshift	OsKitaake01g285600
Chr1	29295693	2	Deletion	Frameshift	OsKitaake01g285600
Chr1	29295696	1	Deletion	Frameshift	OsKitaake01g285600
Chr1	29299010	2	Deletion	Frameshift	OsKitaake01g285500
Chr1	29317796	1	Deletion	Frameshift	OsKitaake01g285900
Chr1	29327020	3	Deletion	Inframe deletion	OsKitaake01g286100
Chr1	29327047	9	Deletion	Inframe deletion	OsKitaake01g286100
Chr1	29327068	3	Deletion	Inframe deletion	OsKitaake01g286100
Chr1	29327222	6	Deletion	Inframe deletion	OsKitaake01g286100
Chr1	29327458	1	Deletion	Frameshift	OsKitaake01g286100
Chr1	29327861	7	Deletion	Frameshift	OsKitaake01g286100
Chr1	29327870	4	Deletion	Frameshift	OsKitaake01g286100
Chr1	29327879	4	Deletion	Frameshift	OsKitaake01g286100
Chr1	29332648	1	Deletion	Frameshift	OsKitaake01g286333
Chr1	29338083	3	Deletion	Inframe deletion	OsKitaake01g286466
Chr1	29402202	3	Deletion	Inframe deletion	OsKitaake01g287800
Chr1	29501435	8	Deletion	Frameshift	OsKitaake01g289000
Chr1	29501445	1	Deletion	Frameshift	OsKitaake01g289000
Chr1	29501447	3	Deletion	Inframe deletion	OsKitaake01g289000
Chr1	29501454	3	Deletion	Start lost	OsKitaake01g289000
Chr1	29684962	6	Deletion	Inframe deletion	OsKitaake01g291400
Chr1	29725506	3	Deletion	Inframe deletion	OsKitaake01g291900
Chr1	30089171	1	Deletion	Frameshift	OsKitaake01g296200
Chr1	30242827	3	Deletion	Inframe deletion	OsKitaake01g297900
Chr1	30245006	1	Deletion	Frameshift	OsKitaake01g297900
Chr1	30273597	5	Deletion	Frameshift	OsKitaake01g298300
Chr1	30273604	2	Deletion	Frameshift	OsKitaake01g298300
Chr1	30278144	18	Deletion	Inframe deletion	OsKitaake01g298400
Chr1	30308886	9	Deletion	Inframe deletion	OsKitaake01g298700
Chr1	30373455	8	Deletion	Frameshift	OsKitaake01g299700
Chr1	30393920	1	Deletion	Frameshift	OsKitaake01g300500
Chr1	30470257	1	Deletion	Frameshift	OsKitaake01g301200
Chr1	30470259	1	Deletion	Frameshift	OsKitaake01g301200
Chr1	30477360	3	Deletion	Inframe deletion	OsKitaake01g301300
Chr1	30477377	2	Deletion	Frameshift	OsKitaake01g301300
Chr1	30477380	1	Deletion	Frameshift	OsKitaake01g301300
Chr1	30517472	39	Deletion	Inframe deletion	OsKitaake01g301800
Chr1	30517514	3	Deletion	Inframe deletion	OsKitaake01g301800
Chr1	30752013	3	Deletion	Inframe deletion	OsKitaake01g304400
Chr1	30798350	3	Deletion	Inframe deletion	OsKitaake01g305000
Chr1	31028241	18	Deletion	Inframe deletion	OsKitaake01g309050
Chr1	32919633	1	Deletion	Frameshift	OsKitaake01g335100
Chr1	33006737	3	Deletion	Inframe deletion	OsKitaake01g336600
Chr1	33197425	2	Deletion	Frameshift	OsKitaake01g339000
Chr1	33224623	21	Deletion	Frameshift	OsKitaake01g339532
Chr1	33224646	11	Deletion	Frameshift	OsKitaake01g339532
Chr1	33224662	5	Deletion	Frameshift	OsKitaake01g339532
Chr1	33571104	12	Deletion	Inframe deletion	OsKitaake01g344000
Chr1	33657746	1	Deletion	Frameshift	OsKitaake01g344900
Chr1	33668356	3	Deletion	Inframe deletion	OsKitaake01g345200
Chr1	33673758	19	Deletion	Frameshift	OsKitaake01g345300
Chr1	33688446	3	Deletion	Inframe deletion	OsKitaake01g345600
Chr1	33688450	1	Deletion	Frameshift	OsKitaake01g345600
Chr1	33688453	7	Deletion	Frameshift	OsKitaake01g345600
Chr1	33768259	6	Deletion	Inframe deletion	OsKitaake01g346700
Chr1	33814832	1	Deletion	Frameshift	OsKitaake01g347400
Chr1	33822947	9	Deletion	Inframe deletion	OsKitaake01g347700
Chr1	34407664	1	Deletion	Frameshift	OsKitaake01g357601
Chr1	35595165	3	Deletion	Inframe deletion	OsKitaake01g376800
Chr1	36452573	12	Deletion	Inframe deletion	OsKitaake01g387100
Chr1	36501597	3	Deletion	Inframe deletion	OsKitaake01g387900
Chr1	36557247	9	Deletion	Inframe deletion	OsKitaake01g388400
Chr1	36978774	8	Deletion	Frameshift	OsKitaake01g394150
Chr1	37047738	1	Deletion	Splice acceptor	OsKitaake01g394900
Chr1	37223184	3	Deletion	Inframe deletion	OsKitaake01g397100
Chr1	37233124	6	Deletion	Inframe deletion	OsKitaake01g397300
Chr1	37700308	9	Deletion	Inframe deletion	OsKitaake01g402500
Chr1	37739818	3	Deletion	Inframe deletion	OsKitaake01g402900
Chr1	38016109	3	Deletion	Inframe deletion	OsKitaake01g405000
Chr1	38016359	6	Deletion	Inframe deletion	OsKitaake01g405000
Chr1	38123785	3	Deletion	Inframe deletion	OsKitaake01g406600
Chr1	38137909	1	Deletion	Frameshift	OsKitaake01g406800
Chr1	38137999	1	Deletion	Frameshift	OsKitaake01g406800
Chr1	38138077	1	Deletion	Frameshift	OsKitaake01g406800
Chr1	38189253	3	Deletion	Inframe deletion	OsKitaake01g407300
Chr1	38197081	1	Deletion	Frameshift	OsKitaake01g407350
Chr1	38288252	9	Deletion	Inframe deletion	OsKitaake01g408000
Chr1	38307046	8	Deletion	Frameshift	OsKitaake01g408200
Chr1	38428213	14	Deletion	Frameshift	OsKitaake01g410500
Chr1	38473054	27	Deletion	Inframe deletion	OsKitaake01g410900
Chr1	38620131	2	Deletion	Frameshift	OsKitaake01g412800
Chr1	38688167	3	Deletion	Inframe deletion	OsKitaake01g413500
Chr1	38716923	3	Deletion	Inframe deletion	OsKitaake01g414000
Chr1	38718348	1	Deletion	Frameshift	OsKitaake01g414000
Chr1	38792936	1	Deletion	Frameshift	OsKitaake01g415500
Chr1	38849451	12	Deletion	Inframe deletion	OsKitaake01g416500
Chr1	38871651	6	Deletion	Inframe deletion	OsKitaake01g416900
Chr1	38985069	9	Deletion	Inframe deletion	OsKitaake01g418100
Chr1	39065633	3	Deletion	Inframe deletion	OsKitaake01g419300
Chr1	39070949	15	Deletion	Inframe deletion	OsKitaake01g419500
Chr1	39124445	1	Deletion	Frameshift	OsKitaake01g420200
Chr1	39211221	3	Deletion	Inframe deletion	OsKitaake01g421450
Chr1	39211287	2	Deletion	Frameshift	OsKitaake01g421450
Chr1	39362257	2	Deletion	Frameshift	OsKitaake01g424500
Chr1	39437907	4	Deletion	Frameshift	OsKitaake01g425200
Chr1	39438102	10	Deletion	Start lost	OsKitaake01g425200
Chr1	39469711	2	Deletion	Frameshift	OsKitaake01g425500
Chr1	39469720	15	Deletion	Inframe deletion	OsKitaake01g425500
Chr1	39482308	75	Deletion	Splice acceptor	OsKitaake01g425800
Chr1	39486550	6	Deletion	Inframe deletion	OsKitaake01g426000
Chr1	39511132	9	Deletion	Inframe deletion	OsKitaake01g426200
Chr1	39511912	8	Deletion	Frameshift	OsKitaake01g426300
Chr1	39511921	1	Deletion	Frameshift	OsKitaake01g426300
Chr1	39562100	9	Deletion	Inframe deletion	OsKitaake01g427300
Chr1	39692442	9	Deletion	Inframe deletion	OsKitaake01g428800
Chr1	39728805	12	Deletion	Inframe deletion	OsKitaake01g429400
Chr1	39759654	17	Deletion	Frameshift	OsKitaake01g429900
Chr1	39760122	1	Deletion	Frameshift	OsKitaake01g429900
Chr1	39832291	2	Deletion	Frameshift	OsKitaake01g430800
Chr1	39890557	5	Deletion	Frameshift	OsKitaake01g431600
Chr1	39890563	4	Deletion	Frameshift	OsKitaake01g431600
Chr1	39985522	6	Deletion	Inframe deletion	OsKitaake01g432900
Chr1	39987335	6	Deletion	Inframe deletion	OsKitaake01g432900
Chr1	39993927	1	Deletion	Frameshift	OsKitaake01g433000
Chr1	39994013	1	Deletion	Frameshift	OsKitaake01g433000
Chr1	40028972	3	Deletion	Inframe deletion	OsKitaake01g433800
Chr1	40076959	10	Deletion	Frameshift	OsKitaake01g434450
Chr1	40183766	3	Deletion	Inframe deletion	OsKitaake01g436200
Chr1	40250377	1	Deletion	Frameshift	OsKitaake01g436600
Chr1	40257787	1	Deletion	Frameshift	OsKitaake01g436700
Chr1	40261565	6	Deletion	Inframe deletion	OsKitaake01g436800
Chr1	40305234	2	Deletion	Frameshift	OsKitaake01g437400
Chr1	40305245	1	Deletion	Frameshift	OsKitaake01g437400
Chr1	40360764	3	Deletion	Inframe deletion	OsKitaake01g438300
Chr1	40565396	9	Deletion	Inframe deletion	OsKitaake01g440600
Chr1	40684670	3	Deletion	Inframe deletion	OsKitaake01g442400
Chr1	40698708	1	Deletion	Frameshift	OsKitaake01g442601
Chr1	40707105	9	Deletion	Inframe deletion	OsKitaake01g442700
Chr1	40711695	6	Deletion	Inframe deletion	OsKitaake01g442800
Chr1	40711732	6	Deletion	Inframe deletion	OsKitaake01g442800
Chr1	40711811	21	Deletion	Inframe deletion	OsKitaake01g442800
Chr1	40712050	3	Deletion	Inframe deletion	OsKitaake01g442800
Chr1	40712073	1	Deletion	Frameshift	OsKitaake01g442800
Chr1	40712081	2	Deletion	Frameshift	OsKitaake01g442800
Chr1	40712087	1	Deletion	Frameshift	OsKitaake01g442800
Chr1	40712193	9	Deletion	Inframe deletion	OsKitaake01g442800
Chr1	40712380	3	Deletion	Inframe deletion	OsKitaake01g442800
Chr1	40720416	3	Deletion	Inframe deletion	OsKitaake01g442900
Chr1	40748415	2	Deletion	Frameshift	OsKitaake01g443400
Chr1	40767294	3	Deletion	Inframe deletion	OsKitaake01g443500
Chr1	40803400	6	Deletion	Inframe deletion	OsKitaake01g443900
Chr1	40830387	1	Deletion	Frameshift	OsKitaake01g444300
Chr1	40853093	1	Deletion	Frameshift	OsKitaake01g444700
Chr1	40902732	1	Deletion	Frameshift	OsKitaake01g446000
Chr1	40953555	12	Deletion	Inframe deletion	OsKitaake01g446600
Chr1	40960037	6	Deletion	Inframe deletion	OsKitaake01g446800
Chr1	40960105	17	Deletion	Frameshift	OsKitaake01g446800
Chr1	40960123	1	Deletion	Frameshift	OsKitaake01g446800
Chr1	40960131	3	Deletion	Inframe deletion	OsKitaake01g446800
Chr1	40960154	3	Deletion	Inframe deletion	OsKitaake01g446800
Chr1	40960263	2	Deletion	Frameshift	OsKitaake01g446800
Chr1	40960305	1	Deletion	Frameshift	OsKitaake01g446800
Chr1	40960416	3	Deletion	Inframe deletion	OsKitaake01g446800
Chr1	40960441	3	Deletion	Inframe deletion	OsKitaake01g446800
Chr1	40960743	6	Deletion	Inframe deletion	OsKitaake01g446800
Chr1	41114332	3	Deletion	Inframe deletion	OsKitaake01g448800
Chr1	41135309	15	Deletion	Inframe deletion	OsKitaake01g449000
Chr1	41139408	18	Deletion	Inframe deletion	OsKitaake01g449100
Chr1	41139518	48	Deletion	Inframe deletion	OsKitaake01g449100
Chr1	41709244	12	Deletion	Inframe deletion	OsKitaake01g455800
Chr1	41751022	6	Deletion	Inframe deletion	OsKitaake01g456400
Chr1	41759946	6	Deletion	Inframe deletion	OsKitaake01g456600
Chr1	41918964	6	Deletion	Inframe deletion	OsKitaake01g459300
Chr1	41957687	1	Deletion	Frameshift	OsKitaake01g459750
Chr1	41957713	1	Deletion	Frameshift	OsKitaake01g459750
Chr1	42014252	6	Deletion	Inframe deletion	OsKitaake01g461000
Chr1	42043788	1	Deletion	Frameshift	OsKitaake01g461500
Chr1	42117103	3	Deletion	Inframe deletion	OsKitaake01g462500
Chr1	42156332	5	Deletion	Frameshift	OsKitaake01g463200
Chr1	42157895	6	Deletion	Inframe deletion	OsKitaake01g463200
Chr1	42192545	3	Deletion	Inframe deletion	OsKitaake01g464000
Chr1	42199803	8	Deletion	Frameshift	OsKitaake01g464200
Chr1	42623614	1	Deletion	Frameshift	OsKitaake01g469500
Chr1	42623912	1	Deletion	Frameshift	OsKitaake01g469500
Chr1	42714691	21	Deletion	Inframe deletion	OsKitaake01g471000
Chr1	42893874	6	Deletion	Inframe deletion	OsKitaake01g472200
Chr1	42899914	13	Deletion	Frameshift	OsKitaake01g472300
Chr1	43058654	3	Deletion	Inframe deletion	OsKitaake01g475100
Chr1	44005561	6	Deletion	Inframe deletion	OsKitaake01g490700
Chr1	44231084	1	Deletion	Frameshift	OsKitaake01g494300
Chr10	181746	11	Deletion	Frameshift	OsKitaake10g001150
Chr10	182570	1	Deletion	Frameshift	OsKitaake10g001150
Chr10	182607	9	Deletion	Inframe deletion	OsKitaake10g001150
Chr10	182623	5	Deletion	Frameshift	OsKitaake10g001150
Chr10	214240	10	Deletion	Frameshift	OsKitaake10g001300
Chr10	326981	9	Deletion	Inframe deletion	OsKitaake10g002200
Chr10	352351	27	Deletion	Inframe deletion	OsKitaake10g002300
Chr10	441396	6	Deletion	Inframe deletion	OsKitaake10g003200
Chr10	443549	9	Deletion	Inframe deletion	OsKitaake10g003200
Chr10	532599	1	Deletion	Frameshift	OsKitaake10g003800
Chr10	597762	1	Deletion	Frameshift	OsKitaake10g004300
Chr10	842741	3	Deletion	Inframe deletion	OsKitaake10g005800
Chr10	842803	2	Deletion	Frameshift	OsKitaake10g005800
Chr10	842820	2	Deletion	Frameshift	OsKitaake10g005800
Chr10	843830	3	Deletion	Inframe deletion	OsKitaake10g005800
Chr10	917830	2	Deletion	Frameshift	OsKitaake10g006500
Chr10	1007023	1	Deletion	Frameshift	OsKitaake10g007200
Chr10	1007351	5	Deletion	Frameshift	OsKitaake10g007200
Chr10	1007357	1	Deletion	Frameshift	OsKitaake10g007200
Chr10	1023694	1	Deletion	Frameshift	OsKitaake10g007500
Chr10	1023932	9	Deletion	Inframe deletion	OsKitaake10g007500
Chr10	1063154	18	Deletion	Inframe deletion	OsKitaake10g007700
Chr10	1095335	3	Deletion	Inframe deletion	OsKitaake10g008200
Chr10	1239571	3	Deletion	Inframe deletion	OsKitaake10g009500
Chr10	1239760	1	Deletion	Frameshift	OsKitaake10g009500
Chr10	1600236	6	Deletion	Inframe deletion	OsKitaake10g011100
Chr10	1601807	1	Deletion	Frameshift	OsKitaake10g011100
Chr10	1629053	5	Deletion	Frameshift	OsKitaake10g011500
Chr10	1630393	1	Deletion	Frameshift	OsKitaake10g011600
Chr10	1712418	3	Deletion	Inframe deletion	OsKitaake10g012000
Chr10	1712520	3	Deletion	Inframe deletion	OsKitaake10g012000
Chr10	1712528	3	Deletion	Inframe deletion	OsKitaake10g012000
Chr10	1713092	1	Deletion	Frameshift	OsKitaake10g012000
Chr10	1713280	2	Deletion	Frameshift	OsKitaake10g012000
Chr10	1713284	4	Deletion	Frameshift	OsKitaake10g012000
Chr10	1713293	3	Deletion	Inframe deletion	OsKitaake10g012000
Chr10	1745323	2	Deletion	Frameshift	OsKitaake10g012400
Chr10	1745328	6	Deletion	Inframe deletion	OsKitaake10g012400
Chr10	1749243	23	Deletion	Frameshift	OsKitaake10g012600
Chr10	1763108	12	Deletion	Inframe deletion	OsKitaake10g012800
Chr10	1847866	3	Deletion	Inframe deletion	OsKitaake10g013900
Chr10	1869573	13	Deletion	Frameshift	OsKitaake10g014400
Chr10	1907109	6	Deletion	Inframe deletion	OsKitaake10g015000
Chr10	1927001	1	Deletion	Frameshift	OsKitaake10g015150
Chr10	1942818	1	Deletion	Frameshift	OsKitaake10g015300
Chr10	1943327	1	Deletion	Frameshift	OsKitaake10g015300
Chr10	1966720	6	Deletion	Frameshift	OsKitaake10g015500
Chr10	1967136	1	Deletion	Frameshift	OsKitaake10g015500
Chr10	1967645	1	Deletion	Frameshift	OsKitaake10g015500
Chr10	2129032	3	Deletion	Inframe deletion	OsKitaake10g016500
Chr10	2156494	15	Deletion	Inframe deletion	OsKitaake10g016800
Chr10	2160270	4	Deletion	Frameshift	OsKitaake10g016800
Chr10	2236369	1	Deletion	Frameshift	OsKitaake10g017800
Chr10	2252950	3	Deletion	Inframe deletion	OsKitaake10g018000
Chr10	2253259	4	Deletion	Frameshift	OsKitaake10g018000
Chr10	2253266	2	Deletion	Frameshift	OsKitaake10g018000
Chr10	2304482	18	Deletion	Inframe deletion	OsKitaake10g018900
Chr10	2308450	10	Deletion	Frameshift	OsKitaake10g019000
Chr10	2308462	2	Deletion	Frameshift	OsKitaake10g019000
Chr10	2320540	2	Deletion	Frameshift	OsKitaake10g019200
Chr10	2320543	1	Deletion	Frameshift	OsKitaake10g019200
Chr10	2348394	3	Deletion	Inframe deletion	OsKitaake10g019250
Chr10	2357287	2	Deletion	Frameshift	OsKitaake10g019300
Chr10	2357290	1	Deletion	Frameshift	OsKitaake10g019300
Chr10	2451883	2	Deletion	Frameshift	OsKitaake10g019600
Chr10	2620979	40	Deletion	Frameshift	OsKitaake10g021100
Chr10	2633589	45	Deletion	Inframe deletion	OsKitaake10g021200
Chr10	2634777	13	Deletion	Frameshift	OsKitaake10g021200
Chr10	2675574	3	Deletion	Inframe deletion	OsKitaake10g021850
Chr10	2694965	3	Deletion	Inframe deletion	OsKitaake10g022100
Chr10	2702849	2	Deletion	Frameshift	OsKitaake10g022200
Chr10	2702852	1	Deletion	Frameshift	OsKitaake10g022200
Chr10	2720325	1	Deletion	Frameshift	OsKitaake10g022300
Chr10	2720327	2	Deletion	Frameshift	OsKitaake10g022300
Chr10	2721295	3	Deletion	Inframe deletion	OsKitaake10g022300
Chr10	2721550	3	Deletion	Inframe deletion	OsKitaake10g022300
Chr10	2721643	12	Deletion	Inframe deletion	OsKitaake10g022300
Chr10	2742822	3	Deletion	Inframe deletion	OsKitaake10g022600
Chr10	2900608	3	Deletion	Inframe deletion	OsKitaake10g023700
Chr10	2952270	3	Deletion	Inframe deletion	OsKitaake10g024200
Chr10	2961387	3	Deletion	Inframe deletion	OsKitaake10g024300
Chr10	2961988	3	Deletion	Inframe deletion	OsKitaake10g024300
Chr10	2976475	6	Deletion	Inframe deletion	OsKitaake10g024400
Chr10	2976598	15	Deletion	Inframe deletion	OsKitaake10g024400
Chr10	2977675	3	Deletion	Inframe deletion	OsKitaake10g024400
Chr10	2977693	1	Deletion	Frameshift	OsKitaake10g024400
Chr10	3089830	12	Deletion	Inframe deletion	OsKitaake10g025200
Chr10	3603339	1	Deletion	Frameshift	OsKitaake10g026700
Chr10	3612266	1	Deletion	Frameshift	OsKitaake10g027000
Chr10	3612309	3	Deletion	Inframe deletion	OsKitaake10g027000
Chr10	3612339	3	Deletion	Inframe deletion	OsKitaake10g027000
Chr10	3612346	1	Deletion	Frameshift	OsKitaake10g027000
Chr10	3612350	2	Deletion	Frameshift	OsKitaake10g027000
Chr10	3666569	1	Deletion	Frameshift	OsKitaake10g027400
Chr10	3666571	2	Deletion	Frameshift	OsKitaake10g027400
Chr10	3666579	3	Deletion	Splice donor	OsKitaake10g027400
Chr10	3920808	1	Deletion	Frameshift	OsKitaake10g029700
Chr10	3920847	16	Deletion	Frameshift	OsKitaake10g029700
Chr10	3920866	42	Deletion	Stop gained	OsKitaake10g029700
Chr10	3920909	8	Deletion	Frameshift	OsKitaake10g029700
Chr10	4082693	1	Deletion	Frameshift	OsKitaake10g031101
Chr10	4082696	1	Deletion	Frameshift	OsKitaake10g031101
Chr10	4082715	2	Deletion	Frameshift	OsKitaake10g031101
Chr10	4108054	20	Deletion	Splice acceptor	OsKitaake10g031300
Chr10	4390300	2	Deletion	Frameshift	OsKitaake10g032700
Chr10	4390303	1	Deletion	Frameshift	OsKitaake10g032700
Chr10	4487199	3	Deletion	Inframe deletion	OsKitaake10g033300
Chr10	4516535	3	Deletion	Inframe deletion	OsKitaake10g033500
Chr10	4529839	6	Deletion	Inframe deletion	OsKitaake10g033600
Chr10	4529847	2	Deletion	Frameshift	OsKitaake10g033600
Chr10	4529850	1	Deletion	Frameshift	OsKitaake10g033600
Chr10	4563973	1	Deletion	Frameshift	OsKitaake10g033700
Chr10	5283843	1	Deletion	Frameshift	OsKitaake10g037801
Chr10	5521724	1	Deletion	Frameshift	OsKitaake10g038300
Chr10	6046269	1	Deletion	Frameshift	OsKitaake10g041700
Chr10	6046525	7	Deletion	Frameshift	OsKitaake10g041700
Chr10	6046553	8	Deletion	Frameshift	OsKitaake10g041700
Chr10	6046572	1	Deletion	Frameshift	OsKitaake10g041700
Chr10	6046596	2	Deletion	Frameshift	OsKitaake10g041700
Chr10	6046600	1	Deletion	Frameshift	OsKitaake10g041700
Chr10	6046602	1	Deletion	Frameshift	OsKitaake10g041700
Chr10	6046615	1	Deletion	Frameshift	OsKitaake10g041700
Chr10	6046617	3	Deletion	Inframe deletion	OsKitaake10g041700
Chr10	6049620	3	Deletion	Inframe deletion	OsKitaake10g041800
Chr10	6721655	6	Deletion	Inframe deletion	OsKitaake10g045800
Chr10	7318825	1	Deletion	Frameshift	OsKitaake10g048000
Chr10	7343573	8	Deletion	Frameshift	OsKitaake10g048300
Chr10	8012367	5	Deletion	Splice acceptor	OsKitaake10g050500
Chr10	8126533	15	Deletion	Inframe deletion	OsKitaake10g051400
Chr10	8174808	3	Deletion	Inframe deletion	OsKitaake10g051700
Chr10	8325238	1	Deletion	Frameshift	OsKitaake10g052101
Chr10	8339928	3	Deletion	Inframe deletion	OsKitaake10g052300
Chr10	8518060	6	Deletion	Inframe deletion	OsKitaake10g052700
Chr10	9060919	1	Deletion	Frameshift	OsKitaake10g053700
Chr10	9448096	6	Deletion	Inframe deletion	OsKitaake10g055001
Chr10	9467062	4	Deletion	Frameshift	OsKitaake10g055100
Chr10	9467827	4	Deletion	Frameshift	OsKitaake10g055100
Chr10	9467841	3	Deletion	Inframe deletion	OsKitaake10g055100
Chr10	9496390	3	Deletion	Inframe deletion	OsKitaake10g055400
Chr10	9642412	2	Deletion	Frameshift	OsKitaake10g056300
Chr10	9662538	5	Deletion	Frameshift	OsKitaake10g056500
Chr10	9662545	1	Deletion	Frameshift	OsKitaake10g056500
Chr10	9662558	3	Deletion	Inframe deletion	OsKitaake10g056500
Chr10	9793378	4	Deletion	Frameshift	OsKitaake10g057200
Chr10	10363628	3	Deletion	Inframe deletion	OsKitaake10g060200
Chr10	10363632	3	Deletion	Inframe deletion	OsKitaake10g060200
Chr10	10363637	3	Deletion	Inframe deletion	OsKitaake10g060200
Chr10	10363641	2	Deletion	Frameshift	OsKitaake10g060200
Chr10	10363755	1	Deletion	Frameshift	OsKitaake10g060200
Chr10	10379820	6	Deletion	Inframe deletion	OsKitaake10g060300
Chr10	10409433	2	Deletion	Frameshift	OsKitaake10g060700
Chr10	10501700	3	Deletion	Inframe deletion	OsKitaake10g061401
Chr10	10530545	56	Deletion	Splice acceptor	OsKitaake10g061800
Chr10	10798332	4	Deletion	Frameshift	OsKitaake10g063900
Chr10	11082591	17	Deletion	Splice donor	OsKitaake10g065301
Chr10	11135788	1	Deletion	Frameshift	OsKitaake10g065400
Chr10	11136127	9	Deletion	Inframe deletion	OsKitaake10g065400
Chr10	11136386	1	Deletion	Frameshift	OsKitaake10g065400
Chr10	11136392	2	Deletion	Frameshift	OsKitaake10g065400
Chr10	11356254	3	Deletion	Inframe deletion	OsKitaake10g067100
Chr10	11356716	9	Deletion	Inframe deletion	OsKitaake10g067100
Chr10	11394148	46	Deletion	Frameshift	OsKitaake10g067270
Chr10	11394266	2	Deletion	Frameshift	OsKitaake10g067270
Chr10	11485619	1	Deletion	Frameshift	OsKitaake10g165809
Chr10	11589498	1	Deletion	Frameshift	OsKitaake10g069100
Chr10	11766279	3	Deletion	Inframe deletion	OsKitaake10g070500
Chr10	11766286	3	Deletion	Inframe deletion	OsKitaake10g070500
Chr10	11973250	15	Deletion	Inframe deletion	OsKitaake10g071300
Chr10	12082409	2	Deletion	Frameshift	OsKitaake10g072000
Chr10	12082412	1	Deletion	Frameshift	OsKitaake10g072000
Chr10	12082424	3	Deletion	Inframe deletion	OsKitaake10g072000
Chr10	12082432	3	Deletion	Inframe deletion	OsKitaake10g072000
Chr10	12259343	1	Deletion	Frameshift	OsKitaake10g073300
Chr10	12287341	2	Deletion	Frameshift	OsKitaake10g073600
Chr10	12287344	1	Deletion	Frameshift	OsKitaake10g073600
Chr10	12348093	1	Deletion	Frameshift	OsKitaake10g074100
Chr10	12351389	1	Deletion	Splice acceptor	OsKitaake10g074100
Chr10	12355429	3	Deletion	Inframe deletion	OsKitaake10g074200
Chr10	12557728	12	Deletion	Inframe deletion	OsKitaake10g076300
Chr10	12611538	6	Deletion	Inframe deletion	OsKitaake10g076600
Chr10	12622991	5	Deletion	Frameshift	OsKitaake10g076700
Chr10	12622997	1	Deletion	Frameshift	OsKitaake10g076700
Chr10	12623162	6	Deletion	Inframe deletion	OsKitaake10g076700
Chr10	12692028	3	Deletion	Inframe deletion	OsKitaake10g077200
Chr10	12718097	12	Deletion	Inframe deletion	OsKitaake10g077500
Chr10	12772757	6	Deletion	Inframe deletion	OsKitaake10g077900
Chr10	12859138	3	Deletion	Inframe deletion	OsKitaake10g078400
Chr10	12876101	6	Deletion	Inframe deletion	OsKitaake10g078500
Chr10	12876112	6	Deletion	Inframe deletion	OsKitaake10g078500
Chr10	13039129	25	Deletion	Frameshift	OsKitaake10g079201
Chr10	13055796	12	Deletion	Inframe deletion	OsKitaake10g079500
Chr10	13055947	12	Deletion	Inframe deletion	OsKitaake10g079500
Chr10	13388936	28	Deletion	Frameshift	OsKitaake10g080100
Chr10	13480835	1	Deletion	Frameshift	OsKitaake10g081000
Chr10	13481209	6	Deletion	Inframe deletion	OsKitaake10g081000
Chr10	13489301	6	Deletion	Splice donor	OsKitaake10g081001
Chr10	13512619	3	Deletion	Inframe deletion	OsKitaake10g081300
Chr10	13573069	1	Deletion	Frameshift	OsKitaake10g081900
Chr10	13574075	1	Deletion	Splice acceptor	OsKitaake10g081900
Chr10	13609291	10	Deletion	Frameshift	OsKitaake10g082100
Chr10	13642699	3	Deletion	Inframe deletion	OsKitaake10g082500
Chr10	13719713	9	Deletion	Splice donor	OsKitaake10g083400
Chr10	13766967	6	Deletion	Inframe deletion	OsKitaake10g084000
Chr10	13777352	3	Deletion	Inframe deletion	OsKitaake10g084100
Chr10	13985747	1	Deletion	Frameshift	OsKitaake10g086100
Chr10	13985749	3	Deletion	Inframe deletion	OsKitaake10g086100
Chr10	14227911	1	Deletion	Frameshift	OsKitaake10g088900
Chr10	14400110	1	Deletion	Frameshift	OsKitaake10g089800
Chr10	14400165	1	Deletion	Frameshift	OsKitaake10g089800
Chr10	14400575	1	Deletion	Frameshift	OsKitaake10g089800
Chr10	14509922	21	Deletion	Inframe deletion	OsKitaake10g090800
Chr10	14515995	6	Deletion	Inframe deletion	OsKitaake10g090901
Chr10	14518600	3	Deletion	Inframe deletion	OsKitaake10g090901
Chr10	14525605	9	Deletion	Inframe deletion	OsKitaake10g091000
Chr10	14590688	33	Deletion	Inframe deletion	OsKitaake10g091800
Chr10	14595089	1	Deletion	Frameshift	OsKitaake10g091900
Chr10	14595098	1	Deletion	Frameshift	OsKitaake10g091900
Chr10	14595105	1	Deletion	Frameshift	OsKitaake10g091900
Chr10	14813471	3	Deletion	Inframe deletion	OsKitaake10g092600
Chr10	14873261	3	Deletion	Inframe deletion	OsKitaake10g092700
Chr10	14897177	1	Deletion	Frameshift	OsKitaake10g092801
Chr10	15047149	2	Deletion	Frameshift	OsKitaake10g094400
Chr10	15164355	1	Deletion	Frameshift	OsKitaake10g096300
Chr10	15329073	6	Deletion	Inframe deletion	OsKitaake10g097900
Chr10	15466837	1	Deletion	Frameshift	OsKitaake10g099501
Chr10	15497887	5	Deletion	Frameshift	OsKitaake10g100000
Chr10	15546042	6	Deletion	Inframe deletion	OsKitaake10g100500
Chr10	15546054	3	Deletion	Inframe deletion	OsKitaake10g100500
Chr10	15605380	27	Deletion	Inframe deletion	OsKitaake10g101200
Chr10	15652184	3	Deletion	Inframe deletion	OsKitaake10g101900
Chr10	15652195	1	Deletion	Frameshift	OsKitaake10g101900
Chr10	15652202	11	Deletion	Frameshift	OsKitaake10g101900
Chr10	15652220	1	Deletion	Frameshift	OsKitaake10g101900
Chr10	15652226	2	Deletion	Frameshift	OsKitaake10g101900
Chr10	15652401	1	Deletion	Frameshift	OsKitaake10g101900
Chr10	15652406	2	Deletion	Frameshift	OsKitaake10g101900
Chr10	15694132	8	Deletion	Frameshift	OsKitaake10g102700
Chr10	15748681	3	Deletion	Inframe deletion	OsKitaake10g102800
Chr10	15756991	1	Deletion	Frameshift	OsKitaake10g102900
Chr10	15832215	6	Deletion	Inframe deletion	OsKitaake10g103100
Chr10	15864329	3	Deletion	Inframe deletion	OsKitaake10g103500
Chr10	15865370	1	Deletion	Frameshift	OsKitaake10g103600
Chr10	15865374	3	Deletion	Inframe deletion	OsKitaake10g103600
Chr10	15865380	1	Deletion	Frameshift	OsKitaake10g103600
Chr10	15877229	3	Deletion	Inframe deletion	OsKitaake10g103700
Chr10	15877546	3	Deletion	Inframe deletion	OsKitaake10g103700
Chr10	15893426	6	Deletion	Inframe deletion	OsKitaake10g103800
Chr10	15898786	12	Deletion	Inframe deletion	OsKitaake10g103900
Chr10	15922242	3	Deletion	Inframe deletion	OsKitaake10g104200
Chr10	15922427	3	Deletion	Inframe deletion	OsKitaake10g104200
Chr10	15933409	3	Deletion	Inframe deletion	OsKitaake10g104600
Chr10	15933660	3	Deletion	Inframe deletion	OsKitaake10g104600
Chr10	16061290	2	Deletion	Frameshift	OsKitaake10g106600
Chr10	16062082	9	Deletion	Inframe deletion	OsKitaake10g106600
Chr10	16063692	6	Deletion	Inframe deletion	OsKitaake10g106700
Chr10	16208794	3	Deletion	Inframe deletion	OsKitaake10g109100
Chr10	16288394	2	Deletion	Splice donor	OsKitaake10g109600
Chr10	16309630	6	Deletion	Inframe deletion	OsKitaake10g109900
Chr10	16355301	1	Deletion	Frameshift	OsKitaake10g110300
Chr10	16384226	1	Deletion	Frameshift	OsKitaake10g110800
Chr10	16393173	9	Deletion	Inframe deletion	OsKitaake10g111100
Chr10	16393509	9	Deletion	Inframe deletion	OsKitaake10g111100
Chr10	16469149	27	Deletion	Inframe deletion	OsKitaake10g111800
Chr10	16475491	6	Deletion	Inframe deletion	OsKitaake10g111900
Chr10	16543866	1	Deletion	Frameshift	OsKitaake10g112501
Chr10	16563890	4	Deletion	Frameshift	OsKitaake10g112502
Chr10	16572699	3	Deletion	Inframe deletion	OsKitaake10g112800
Chr10	16605966	3	Deletion	Inframe deletion	OsKitaake10g113400
Chr10	16606011	3	Deletion	Inframe deletion	OsKitaake10g113400
Chr10	16606211	3	Deletion	Inframe deletion	OsKitaake10g113400
Chr10	16626598	3	Deletion	Inframe deletion	OsKitaake10g113700
Chr10	16626701	3	Deletion	Inframe deletion	OsKitaake10g113700
Chr10	16645718	1	Deletion	Frameshift	OsKitaake10g113900
Chr10	16649733	9	Deletion	Inframe deletion	OsKitaake10g114000
Chr10	16746179	4	Deletion	Frameshift	OsKitaake10g114200
Chr10	16746266	2	Deletion	Frameshift	OsKitaake10g114200
Chr10	16786491	3	Deletion	Inframe deletion	OsKitaake10g114500
Chr10	16798455	3	Deletion	Inframe deletion	OsKitaake10g114700
Chr10	17026093	3	Deletion	Inframe deletion	OsKitaake10g116600
Chr10	17064316	4	Deletion	Frameshift	OsKitaake10g116801
Chr10	17190784	3	Deletion	Inframe deletion	OsKitaake10g117600
Chr10	17218150	1	Deletion	Frameshift	OsKitaake10g117800
Chr10	17427966	2	Deletion	Frameshift	OsKitaake10g118700
Chr10	17428002	2	Deletion	Frameshift	OsKitaake10g118700
Chr10	17428038	3	Deletion	Inframe deletion	OsKitaake10g118700
Chr10	17525186	5	Deletion	Frameshift	OsKitaake10g119600
Chr10	17535774	9	Deletion	Inframe deletion	OsKitaake10g119800
Chr10	17627443	12	Deletion	Inframe deletion	OsKitaake10g120900
Chr10	17662537	9	Deletion	Inframe deletion	OsKitaake10g121200
Chr10	17670886	47	Deletion	Bidirectional gene fusion	OsKitaake10g121300&OsKitaake10g121500
Chr10	17752974	1	Deletion	Frameshift	OsKitaake10g122300
Chr10	17868973	15	Deletion	Inframe deletion	OsKitaake10g124200
Chr10	17875741	7	Deletion	Frameshift	OsKitaake10g124201
Chr10	17882486	1	Deletion	Frameshift	OsKitaake10g124600
Chr10	17882506	1	Deletion	Frameshift	OsKitaake10g124600
Chr10	17885588	6	Deletion	Inframe deletion	OsKitaake10g124700
Chr10	17917157	2	Deletion	Frameshift	OsKitaake10g125300
Chr10	17994013	1	Deletion	Frameshift	OsKitaake10g126600
Chr10	18011908	3	Deletion	Inframe deletion	OsKitaake10g127000
Chr10	18011913	3	Deletion	Inframe deletion	OsKitaake10g127000
Chr10	18014846	9	Deletion	Inframe deletion	OsKitaake10g127000
Chr10	18056903	6	Deletion	Inframe deletion	OsKitaake10g127300
Chr10	18057682	1	Deletion	Frameshift	OsKitaake10g127300
Chr10	18064678	1	Deletion	Frameshift	OsKitaake10g127400
Chr10	18122919	1	Deletion	Frameshift	OsKitaake10g128200
Chr10	18198315	3	Deletion	Splice donor	OsKitaake10g128600
Chr10	18391737	4	Deletion	Frameshift	OsKitaake10g130100
Chr10	18391742	5	Deletion	Frameshift	OsKitaake10g130100
Chr10	18391748	1	Deletion	Frameshift	OsKitaake10g130100
Chr10	18472585	9	Deletion	Inframe deletion	OsKitaake10g130900
Chr10	18498356	6	Deletion	Inframe deletion	OsKitaake10g131300
Chr10	18594897	9	Deletion	Start lost	OsKitaake10g132100
Chr10	18875907	1	Deletion	Frameshift	OsKitaake10g134400
Chr10	18892175	7	Deletion	Frameshift	OsKitaake10g134700
Chr10	18895858	1	Deletion	Frameshift	OsKitaake10g134700
Chr10	18903283	6	Deletion	Inframe deletion	OsKitaake10g134900
Chr10	19009223	23	Deletion	Frameshift	OsKitaake10g135900
Chr10	19009247	1	Deletion	Frameshift	OsKitaake10g135900
Chr10	19043817	16	Deletion	Frameshift	OsKitaake10g136300
Chr10	19057517	3	Deletion	Inframe deletion	OsKitaake10g136700
Chr10	19118504	3	Deletion	Inframe deletion	OsKitaake10g137500
Chr10	19129893	6	Deletion	Inframe deletion	OsKitaake10g137700
Chr10	19180099	10	Deletion	Frameshift	OsKitaake10g138301
Chr10	19180360	9	Deletion	Inframe deletion	OsKitaake10g138301
Chr10	19398160	6	Deletion	Inframe deletion	OsKitaake10g141400
Chr10	19423244	3	Deletion	Inframe deletion	OsKitaake10g141800
Chr10	19423281	22	Deletion	Frameshift	OsKitaake10g141800
Chr10	19433092	4	Deletion	Frameshift	OsKitaake10g142000
Chr10	19464145	9	Deletion	Inframe deletion	OsKitaake10g142600
Chr10	19465352	15	Deletion	Inframe deletion	OsKitaake10g142600
Chr10	19515712	6	Deletion	Inframe deletion	OsKitaake10g143300
Chr10	19515769	6	Deletion	Inframe deletion	OsKitaake10g143300
Chr10	19594371	21	Deletion	Inframe deletion	OsKitaake10g144300
Chr10	19619063	1	Deletion	Frameshift	OsKitaake10g144700
Chr10	19659294	9	Deletion	Inframe deletion	OsKitaake10g145500
Chr10	19678305	9	Deletion	Inframe deletion	OsKitaake10g145700
Chr10	19800131	71	Deletion	Frameshift	OsKitaake10g147500
Chr10	19854004	9	Deletion	Inframe deletion	OsKitaake10g148300
Chr10	19874137	3	Deletion	Frameshift	OsKitaake10g148700
Chr10	19907870	6	Deletion	Inframe deletion	OsKitaake10g149100
Chr10	19948518	3	Deletion	Inframe deletion	OsKitaake10g150100
Chr10	19981446	5	Deletion	Frameshift	OsKitaake10g150500
Chr10	19981453	1	Deletion	Frameshift	OsKitaake10g150500
Chr10	20146298	3	Deletion	Inframe deletion	OsKitaake10g152700
Chr10	20152108	2	Deletion	Frameshift	OsKitaake10g152800
Chr10	20152124	2	Deletion	Frameshift	OsKitaake10g152800
Chr10	20152128	1	Deletion	Frameshift	OsKitaake10g152800
Chr10	20186122	9	Deletion	Stop gained	OsKitaake10g153500
Chr10	20186133	1	Deletion	Frameshift	OsKitaake10g153500
Chr10	20186135	3	Deletion	Inframe deletion	OsKitaake10g153500
Chr10	20186139	2	Deletion	Frameshift	OsKitaake10g153500
Chr10	20198375	12	Deletion	Inframe deletion	OsKitaake10g153700
Chr10	20234982	3	Deletion	Inframe deletion	OsKitaake10g154000
Chr10	20247328	12	Deletion	Inframe deletion	OsKitaake10g154100
Chr10	20421105	1	Deletion	Frameshift	OsKitaake10g156200
Chr10	20421193	1	Deletion	Frameshift	OsKitaake10g156200
Chr10	20421475	2	Deletion	Frameshift	OsKitaake10g156200
Chr10	20448194	2	Deletion	Frameshift	OsKitaake10g156300
Chr10	20462950	3	Deletion	Inframe deletion	OsKitaake10g156700
Chr10	20524954	3	Deletion	Inframe deletion	OsKitaake10g157100
Chr10	20580963	1	Deletion	Frameshift	OsKitaake10g157600
Chr10	20623290	3	Deletion	Inframe deletion	OsKitaake10g158200
Chr10	20623301	6	Deletion	Inframe deletion	OsKitaake10g158200
Chr10	20623325	3	Deletion	Inframe deletion	OsKitaake10g158200
Chr10	20623509	78	Deletion	Inframe deletion	OsKitaake10g158200
Chr10	20635511	3	Deletion	Inframe deletion	OsKitaake10g158500
Chr10	20658126	1	Deletion	Frameshift	OsKitaake10g158700
Chr10	20658128	1	Deletion	Frameshift	OsKitaake10g158700
Chr10	20658132	1	Deletion	Frameshift	OsKitaake10g158700
Chr10	20733145	6	Deletion	Inframe deletion	OsKitaake10g159400
Chr10	20750833	12	Deletion	Inframe deletion	OsKitaake10g159601
Chr10	20750848	3	Deletion	Inframe deletion	OsKitaake10g159601
Chr10	20750852	2	Deletion	Frameshift	OsKitaake10g159601
Chr10	20750859	3	Deletion	Inframe deletion	OsKitaake10g159601
Chr10	20750868	10	Deletion	Frameshift	OsKitaake10g159601
Chr10	20750884	4	Deletion	Frameshift	OsKitaake10g159601
Chr10	20750890	2	Deletion	Frameshift	OsKitaake10g159601
Chr10	20750909	18	Deletion	Inframe deletion	OsKitaake10g159601
Chr10	20750932	1	Deletion	Frameshift	OsKitaake10g159601
Chr10	20750934	15	Deletion	Inframe deletion	OsKitaake10g159601
Chr10	20750955	20	Deletion	Frameshift	OsKitaake10g159601
Chr10	20751326	6	Deletion	Inframe deletion	OsKitaake10g159601
Chr10	20911826	12	Deletion	Inframe deletion	OsKitaake10g161200
Chr10	20939324	6	Deletion	Inframe deletion	OsKitaake10g161600
Chr10	21090511	1	Deletion	Frameshift	OsKitaake10g163600
Chr10	21107795	33	Deletion	Inframe deletion	OsKitaake10g163800
Chr10	21173083	14	Deletion	Frameshift	OsKitaake10g164200
Chr10	21185984	3	Deletion	Inframe deletion	OsKitaake10g164500
Chr10	21235787	3	Deletion	Inframe deletion	OsKitaake10g165202
Chr10	21296615	1	Deletion	Frameshift	OsKitaake10g168100
Chr10	21338828	6	Deletion	Inframe deletion	OsKitaake10g168200
Chr10	21399819	4	Deletion	Frameshift	OsKitaake10g169200
Chr10	21428077	3	Deletion	Inframe deletion	OsKitaake10g169900
Chr10	21430437	6	Deletion	Inframe deletion	OsKitaake10g170000
Chr10	21536497	1	Deletion	Frameshift	OsKitaake10g171500
Chr10	21700506	9	Deletion	Inframe deletion	OsKitaake10g173900
Chr10	21854724	3	Deletion	Inframe deletion	OsKitaake10g176250
Chr10	21892731	1	Deletion	Frameshift	OsKitaake10g176700
Chr10	21907380	1	Deletion	Frameshift	OsKitaake10g176800
Chr10	21912897	3	Deletion	Inframe deletion	OsKitaake10g176900
Chr10	21953658	21	Deletion	Inframe deletion	OsKitaake10g177300
Chr10	21954412	4	Deletion	Frameshift	OsKitaake10g177300
Chr10	22126850	3	Deletion	Inframe deletion	OsKitaake10g179600
Chr10	22168138	12	Deletion	Inframe deletion	OsKitaake10g180700
Chr10	22224623	6	Deletion	Inframe deletion	OsKitaake10g181300
Chr10	22345109	1	Deletion	Frameshift	OsKitaake10g183400
Chr10	22436639	3	Deletion	Inframe deletion	OsKitaake10g184500
Chr10	22462691	18	Deletion	Inframe deletion	OsKitaake10g184900
Chr10	22521287	3	Deletion	Inframe deletion	OsKitaake10g186000
Chr10	22561631	3	Deletion	Inframe deletion	OsKitaake10g186500
Chr10	22666869	9	Deletion	Inframe deletion	OsKitaake10g187600
Chr10	22819612	20	Deletion	Frameshift	OsKitaake10g190000
Chr10	22842130	12	Deletion	Inframe deletion	OsKitaake10g190400
Chr10	22858734	1	Deletion	Frameshift	OsKitaake10g190700
Chr10	22912542	6	Deletion	Inframe deletion	OsKitaake10g191400
Chr10	22922226	9	Deletion	Inframe deletion	OsKitaake10g191600
Chr10	22963931	6	Deletion	Inframe deletion	OsKitaake10g192200
Chr10	22993183	12	Deletion	Inframe deletion	OsKitaake10g192750
Chr10	23013602	9	Deletion	Inframe deletion	OsKitaake10g192900
Chr10	23023761	5	Deletion	Frameshift	OsKitaake10g193100
Chr10	23074343	9	Deletion	Inframe deletion	OsKitaake10g194100
Chr10	23083828	14	Deletion	Frameshift	OsKitaake10g194250
Chr10	23120618	17	Deletion	Frameshift	OsKitaake10g195000
Chr10	23134540	3	Deletion	Inframe deletion	OsKitaake10g195250
Chr10	23173357	9	Deletion	Inframe deletion	OsKitaake10g195500
Chr10	23226048	5	Deletion	Frameshift	OsKitaake10g195900
Chr10	23226054	1	Deletion	Frameshift	OsKitaake10g195900
Chr10	23226103	3	Deletion	Inframe deletion	OsKitaake10g195900
Chr10	23226246	3	Deletion	Inframe deletion	OsKitaake10g195900
Chr10	23298094	1	Deletion	Frameshift	OsKitaake10g197400
Chr10	23302488	4	Deletion	Frameshift	OsKitaake10g197500
Chr11	36626	17	Deletion	Frameshift	OsKitaake11g000080
Chr11	36942	16	Deletion	Frameshift	OsKitaake11g000080
Chr11	68746	6	Deletion	Inframe deletion	OsKitaake11g000160
Chr11	68841	1	Deletion	Frameshift	OsKitaake11g000160
Chr11	69438	3	Deletion	Inframe deletion	OsKitaake11g000160
Chr11	69631	1	Deletion	Frameshift	OsKitaake11g000160
Chr11	71841	12	Deletion	Splice acceptor	OsKitaake11g000176
Chr11	261152	27	Deletion	Inframe deletion	OsKitaake11g001900
Chr11	683741	11	Deletion	Frameshift	OsKitaake11g008400
Chr11	738359	13	Deletion	Frameshift	OsKitaake11g009100
Chr11	795072	17	Deletion	Frameshift	OsKitaake11g010200
Chr11	823385	33	Deletion	Inframe deletion	OsKitaake11g010700
Chr11	871859	3	Deletion	Inframe deletion	OsKitaake11g011401
Chr11	1064317	15	Deletion	Inframe deletion	OsKitaake11g012900
Chr11	1065131	1	Deletion	Frameshift	OsKitaake11g012900
Chr11	1065441	1	Deletion	Frameshift	OsKitaake11g012900
Chr11	1124569	16	Deletion	Frameshift	OsKitaake11g013900
Chr11	1132852	1	Deletion	Frameshift	OsKitaake11g014000
Chr11	1271388	1	Deletion	Frameshift	OsKitaake11g015400
Chr11	1316273	9	Deletion	Inframe deletion	OsKitaake11g016100
Chr11	1344803	14	Deletion	Frameshift	OsKitaake11g016700
Chr11	1344818	7	Deletion	Frameshift	OsKitaake11g016700
Chr11	1363742	3	Deletion	Inframe deletion	OsKitaake11g017400
Chr11	1414158	3	Deletion	Inframe deletion	OsKitaake11g018201
Chr11	1482435	24	Deletion	Inframe deletion	OsKitaake11g019400
Chr11	1487492	1	Deletion	Frameshift	OsKitaake11g019500
Chr11	1531811	26	Deletion	Frameshift	OsKitaake11g020200
Chr11	1583973	2	Deletion	Frameshift	OsKitaake11g020900
Chr11	1639381	13	Deletion	Splice donor	OsKitaake11g021800
Chr11	1758023	19	Deletion	Frameshift	OsKitaake11g024000
Chr11	1840108	3	Deletion	Frameshift	OsKitaake11g025700
Chr11	1844460	2	Deletion	Frameshift	OsKitaake11g025800
Chr11	1844465	7	Deletion	Frameshift	OsKitaake11g025800
Chr11	1844473	1	Deletion	Frameshift	OsKitaake11g025800
Chr11	1885747	1	Deletion	Frameshift	OsKitaake11g026600
Chr11	1885875	16	Deletion	Frameshift	OsKitaake11g026600
Chr11	1931074	9	Deletion	Inframe deletion	OsKitaake11g027000
Chr11	1931167	9	Deletion	Inframe deletion	OsKitaake11g027000
Chr11	2060496	3	Deletion	Inframe deletion	OsKitaake11g030200
Chr11	2326668	9	Deletion	Inframe deletion	OsKitaake11g033600
Chr11	2326689	3	Deletion	Inframe deletion	OsKitaake11g033600
Chr11	2390625	9	Deletion	Inframe deletion	OsKitaake11g034600
Chr11	2404941	3	Deletion	Inframe deletion	OsKitaake11g034800
Chr11	2450907	10	Deletion	Frameshift	OsKitaake11g035400
Chr11	2450919	2	Deletion	Frameshift	OsKitaake11g035400
Chr11	2450924	3	Deletion	Inframe deletion	OsKitaake11g035400
Chr11	2467861	3	Deletion	Inframe deletion	OsKitaake11g035700
Chr11	2474855	3	Deletion	Inframe deletion	OsKitaake11g035800
Chr11	2502617	20	Deletion	Frameshift	OsKitaake11g036300
Chr11	2504472	2	Deletion	Frameshift	OsKitaake11g036400
Chr11	2518935	9	Deletion	Inframe deletion	OsKitaake11g036700
Chr11	2532244	6	Deletion	Inframe deletion	OsKitaake11g036900
Chr11	2532300	1	Deletion	Frameshift	OsKitaake11g036900
Chr11	2682217	21	Deletion	Inframe deletion	OsKitaake11g038200
Chr11	2767506	2	Deletion	Splice donor	OsKitaake11g039000
Chr11	3216811	6	Deletion	Inframe deletion	OsKitaake11g044400
Chr11	3241437	31	Deletion	Splice acceptor	OsKitaake11g044900
Chr11	3278746	9	Deletion	Inframe deletion	OsKitaake11g045500
Chr11	3337906	3	Deletion	Inframe deletion	OsKitaake11g046300
Chr11	3352391	1	Deletion	Frameshift	OsKitaake11g046600
Chr11	3462585	1	Deletion	Frameshift	OsKitaake11g047700
Chr11	3463365	28	Deletion	Frameshift	OsKitaake11g047700
Chr11	3536652	1	Deletion	Frameshift	OsKitaake11g049300
Chr11	3561234	2	Deletion	Frameshift	OsKitaake11g049500
Chr11	3561237	1	Deletion	Frameshift	OsKitaake11g049500
Chr11	3563072	1	Deletion	Frameshift	OsKitaake11g049500
Chr11	3569083	1	Deletion	Frameshift	OsKitaake11g049600
Chr11	3597324	1	Deletion	Frameshift	OsKitaake11g049700
Chr11	3679659	9	Deletion	Inframe deletion	OsKitaake11g051100
Chr11	3682741	3	Deletion	Inframe deletion	OsKitaake11g051200
Chr11	3697765	2	Deletion	Frameshift	OsKitaake11g051300
Chr11	3697768	1	Deletion	Frameshift	OsKitaake11g051300
Chr11	3708804	2	Deletion	Splice acceptor	OsKitaake11g051600
Chr11	3726768	1	Deletion	Frameshift	OsKitaake11g051900
Chr11	3731382	9	Deletion	Inframe deletion	OsKitaake11g052000
Chr11	3801575	3	Deletion	Inframe deletion	OsKitaake11g052900
Chr11	3822660	17	Deletion	Frameshift	OsKitaake11g053250
Chr11	3822833	14	Deletion	Splice donor	OsKitaake11g053250
Chr11	3923343	9	Deletion	Inframe deletion	OsKitaake11g054000
Chr11	3945706	5	Deletion	Frameshift	OsKitaake11g054200
Chr11	3989412	1	Deletion	Frameshift	OsKitaake11g054600
Chr11	4168025	3	Deletion	Inframe deletion	OsKitaake11g056500
Chr11	4180344	1	Deletion	Frameshift	OsKitaake11g056700
Chr11	4180961	3	Deletion	Inframe deletion	OsKitaake11g056700
Chr11	4214996	6	Deletion	Inframe deletion	OsKitaake11g056800
Chr11	4224193	3	Deletion	Inframe deletion	OsKitaake11g056900
Chr11	4251236	2	Deletion	Frameshift	OsKitaake11g057100
Chr11	4268015	1	Deletion	Frameshift	OsKitaake11g057300
Chr11	4269133	3	Deletion	Inframe deletion	OsKitaake11g057300
Chr11	4292077	1	Deletion	Frameshift	OsKitaake11g057501
Chr11	4293127	32	Deletion	Frameshift	OsKitaake11g057501
Chr11	4293219	13	Deletion	Frameshift	OsKitaake11g057501
Chr11	4532150	3	Deletion	Splice donor	OsKitaake11g060300
Chr11	4714242	1	Deletion	Frameshift	OsKitaake11g061300
Chr11	4810193	15	Deletion	Inframe deletion	OsKitaake11g061900
Chr11	4810222	2	Deletion	Frameshift	OsKitaake11g061900
Chr11	4810244	1	Deletion	Frameshift	OsKitaake11g061900
Chr11	4810257	19	Deletion	Frameshift	OsKitaake11g061900
Chr11	4810368	3	Deletion	Inframe deletion	OsKitaake11g061900
Chr11	4833878	1	Deletion	Frameshift	OsKitaake11g062000
Chr11	4833931	6	Deletion	Inframe deletion	OsKitaake11g062000
Chr11	4857249	3	Deletion	Inframe deletion	OsKitaake11g062200
Chr11	4884374	2	Deletion	Frameshift	OsKitaake11g062600
Chr11	5053464	3	Deletion	Inframe deletion	OsKitaake11g064100
Chr11	5076322	3	Deletion	Inframe deletion	OsKitaake11g064300
Chr11	5076332	9	Deletion	Inframe deletion	OsKitaake11g064300
Chr11	5076507	3	Deletion	Inframe deletion	OsKitaake11g064300
Chr11	5076718	9	Deletion	Inframe deletion	OsKitaake11g064300
Chr11	5076808	3	Deletion	Inframe deletion	OsKitaake11g064300
Chr11	5114706	4	Deletion	Frameshift	OsKitaake11g064366
Chr11	5117275	4	Deletion	Frameshift	OsKitaake11g064432
Chr11	5120920	1	Deletion	Frameshift	OsKitaake11g064600
Chr11	5145110	4	Deletion	Frameshift	OsKitaake11g064800
Chr11	5157865	2	Deletion	Frameshift	OsKitaake11g064900
Chr11	5157869	4	Deletion	Frameshift	OsKitaake11g064900
Chr11	5208040	1	Deletion	Frameshift	OsKitaake11g065500
Chr11	5216644	1	Deletion	Frameshift	OsKitaake11g065600
Chr11	5253107	6	Deletion	Inframe deletion	OsKitaake11g066200
Chr11	5431009	1	Deletion	Frameshift	OsKitaake11g066600
Chr11	5431012	2	Deletion	Frameshift	OsKitaake11g066600
Chr11	5494351	1	Deletion	Frameshift	OsKitaake11g067400
Chr11	5609085	1	Deletion	Frameshift	OsKitaake11g068700
Chr11	5678126	2	Deletion	Frameshift	OsKitaake11g069500
Chr11	5678325	3	Deletion	Inframe deletion	OsKitaake11g069500
Chr11	5686264	3	Deletion	Inframe deletion	OsKitaake11g069600
Chr11	5760571	1	Deletion	Frameshift	OsKitaake11g070650
Chr11	5781062	1	Deletion	Frameshift	OsKitaake11g070900
Chr11	5799209	3	Deletion	Inframe deletion	OsKitaake11g071000
Chr11	5799219	3	Deletion	Inframe deletion	OsKitaake11g071000
Chr11	5919259	2	Deletion	Frameshift	OsKitaake11g072200
Chr11	6118043	6	Deletion	Inframe deletion	OsKitaake11g073800
Chr11	6118086	9	Deletion	Inframe deletion	OsKitaake11g073800
Chr11	6118096	3	Deletion	Inframe deletion	OsKitaake11g073800
Chr11	6140096	3	Deletion	Inframe deletion	OsKitaake11g073900
Chr11	6251332	1	Deletion	Frameshift	OsKitaake11g075000
Chr11	6336365	8	Deletion	Frameshift	OsKitaake11g075500
Chr11	6336827	17	Deletion	Frameshift	OsKitaake11g075500
Chr11	6338524	29	Deletion	Frameshift	OsKitaake11g075500
Chr11	6353562	2	Deletion	Frameshift	OsKitaake11g075800
Chr11	6389451	32	Deletion	Start lost	OsKitaake11g076000
Chr11	6429799	1	Deletion	Frameshift	OsKitaake11g076500
Chr11	6429896	3	Deletion	Inframe deletion	OsKitaake11g076500
Chr11	6461973	12	Deletion	Inframe deletion	OsKitaake11g076700
Chr11	6520391	1	Deletion	Frameshift	OsKitaake11g077400
Chr11	6520395	2	Deletion	Frameshift	OsKitaake11g077400
Chr11	6524403	1	Deletion	Frameshift	OsKitaake11g077500
Chr11	6525612	3	Deletion	Inframe deletion	OsKitaake11g077500
Chr11	6525620	1	Deletion	Frameshift	OsKitaake11g077500
Chr11	6632774	1	Deletion	Frameshift	OsKitaake11g079900
Chr11	6632776	2	Deletion	Frameshift	OsKitaake11g079900
Chr11	6648918	3	Deletion	Inframe deletion	OsKitaake11g079000
Chr11	6648924	15	Deletion	Inframe deletion	OsKitaake11g079000
Chr11	6648940	3	Deletion	Inframe deletion	OsKitaake11g079000
Chr11	6708519	18	Deletion	Inframe deletion	OsKitaake11g079600
Chr11	6708538	6	Deletion	Inframe deletion	OsKitaake11g079600
Chr11	6708546	1	Deletion	Frameshift	OsKitaake11g079600
Chr11	7220844	5	Deletion	Frameshift	OsKitaake11g082200
Chr11	7220854	2	Deletion	Frameshift	OsKitaake11g082200
Chr11	7239311	6	Deletion	Inframe deletion	OsKitaake11g082400
Chr11	7243918	21	Deletion	Inframe deletion	OsKitaake11g082500
Chr11	7248451	12	Deletion	Inframe deletion	OsKitaake11g082566
Chr11	7257405	6	Deletion	Inframe deletion	OsKitaake11g082700
Chr11	7257634	3	Deletion	Inframe deletion	OsKitaake11g082700
Chr11	7257651	3	Deletion	Inframe deletion	OsKitaake11g082700
Chr11	7284867	3	Deletion	Inframe deletion	OsKitaake11g082900
Chr11	7292492	6	Deletion	Inframe deletion	OsKitaake11g083000
Chr11	7308695	9	Deletion	Inframe deletion	OsKitaake11g083200
Chr11	7308728	3	Deletion	Inframe deletion	OsKitaake11g083200
Chr11	7315657	3	Deletion	Inframe deletion	OsKitaake11g083400
Chr11	7316550	2	Deletion	Frameshift	OsKitaake11g083400
Chr11	7316560	2	Deletion	Frameshift	OsKitaake11g083400
Chr11	7316563	2	Deletion	Frameshift	OsKitaake11g083400
Chr11	7316566	3	Deletion	Inframe deletion	OsKitaake11g083400
Chr11	7316807	3	Deletion	Inframe deletion	OsKitaake11g083400
Chr11	7330050	3	Deletion	Inframe deletion	OsKitaake11g083600
Chr11	7351556	31	Deletion	Frameshift	OsKitaake11g083701
Chr11	7417929	3	Deletion	Inframe deletion	OsKitaake11g083800
Chr11	7418251	3	Deletion	Inframe deletion	OsKitaake11g083800
Chr11	7418258	1	Deletion	Frameshift	OsKitaake11g083800
Chr11	7418261	2	Deletion	Frameshift	OsKitaake11g083800
Chr11	7715400	1	Deletion	Frameshift	OsKitaake11g086150
Chr11	7883773	15	Deletion	Inframe deletion	OsKitaake11g087250
Chr11	7884333	9	Deletion	Inframe deletion	OsKitaake11g087250
Chr11	8031457	3	Deletion	Inframe deletion	OsKitaake11g088500
Chr11	8048327	3	Deletion	Inframe deletion	OsKitaake11g088600
Chr11	8378172	2	Deletion	Frameshift	OsKitaake11g091500
Chr11	8729422	9	Deletion	Inframe deletion	OsKitaake11g094350
Chr11	8932841	3	Deletion	Inframe deletion	OsKitaake11g095400
Chr11	8952655	1	Deletion	Splice donor	OsKitaake11g095501
Chr11	9010758	49	Deletion	Frameshift	OsKitaake11g095700
Chr11	9010881	3	Deletion	Inframe deletion	OsKitaake11g095700
Chr11	9338357	12	Deletion	Inframe deletion	OsKitaake11g097800
Chr11	9421186	5	Deletion	Frameshift	OsKitaake11g098500
Chr11	9421192	1	Deletion	Frameshift	OsKitaake11g098500
Chr11	9446715	1	Deletion	Frameshift	OsKitaake11g098900
Chr11	9997611	10	Deletion	Frameshift	OsKitaake11g101800
Chr11	10070572	4	Deletion	Frameshift	OsKitaake11g102400
Chr11	10421487	18	Deletion	Inframe deletion	OsKitaake11g104200
Chr11	10423394	6	Deletion	Inframe deletion	OsKitaake11g104200
Chr11	10489563	1	Deletion	Frameshift	OsKitaake11g104350
Chr11	10517095	1	Deletion	Frameshift	OsKitaake11g104600
Chr11	10518407	1	Deletion	Frameshift	OsKitaake11g104600
Chr11	11249195	1	Deletion	Frameshift	OsKitaake11g107700
Chr11	11447843	1	Deletion	Frameshift	OsKitaake11g108600
Chr11	11694888	9	Deletion	Inframe deletion	OsKitaake11g109300
Chr11	12315279	6	Deletion	Inframe deletion	OsKitaake11g112950
Chr11	12315287	2	Deletion	Frameshift	OsKitaake11g112950
Chr11	12315430	1	Deletion	Frameshift	OsKitaake11g112950
Chr11	12315457	15	Deletion	Inframe deletion	OsKitaake11g112950
Chr11	12918055	1	Deletion	Frameshift	OsKitaake11g114101
Chr11	14062414	3	Deletion	Inframe deletion	OsKitaake11g117600
Chr11	14537568	3	Deletion	Inframe deletion	OsKitaake11g121200
Chr11	14538425	4	Deletion	Frameshift	OsKitaake11g121300
Chr11	14609661	34	Deletion	Frameshift	OsKitaake11g121550
Chr11	15542387	51	Deletion	Inframe deletion	OsKitaake11g125400
Chr11	15542439	3	Deletion	Inframe deletion	OsKitaake11g125400
Chr11	15608236	6	Deletion	Inframe deletion	OsKitaake11g125500
Chr11	15635883	3	Deletion	Inframe deletion	OsKitaake11g125700
Chr11	15674927	1	Deletion	Frameshift	OsKitaake11g126201
Chr11	16226889	2	Deletion	Frameshift	OsKitaake11g129400
Chr11	16334880	27	Deletion	Inframe deletion	OsKitaake11g130001
Chr11	16334915	1	Deletion	Frameshift	OsKitaake11g130001
Chr11	16334918	1	Deletion	Frameshift	OsKitaake11g130001
Chr11	16334922	11	Deletion	Frameshift	OsKitaake11g130001
Chr11	16334935	5	Deletion	Frameshift	OsKitaake11g130001
Chr11	16528084	9	Deletion	Inframe deletion	OsKitaake11g131000
Chr11	16710977	6	Deletion	Inframe deletion	OsKitaake11g132300
Chr11	17001142	1	Deletion	Frameshift	OsKitaake11g132900
Chr11	17001646	2	Deletion	Frameshift	OsKitaake11g132900
Chr11	17002135	2	Deletion	Frameshift	OsKitaake11g132900
Chr11	17002140	1	Deletion	Frameshift	OsKitaake11g132900
Chr11	17006966	13	Deletion	Frameshift	OsKitaake11g132900
Chr11	17145238	10	Deletion	Frameshift	OsKitaake11g133800
Chr11	17145395	3	Deletion	Inframe deletion	OsKitaake11g133800
Chr11	17325469	1	Deletion	Frameshift	OsKitaake11g135200
Chr11	17325870	4	Deletion	Frameshift	OsKitaake11g135200
Chr11	17366887	1	Deletion	Frameshift	OsKitaake11g135800
Chr11	17431698	3	Deletion	Inframe deletion	OsKitaake11g136300
Chr11	17482241	3	Deletion	Inframe deletion	OsKitaake11g136800
Chr11	17514746	9	Deletion	Inframe deletion	OsKitaake11g137100
Chr11	17550283	7	Deletion	Frameshift	OsKitaake11g137600
Chr11	17550296	2	Deletion	Frameshift	OsKitaake11g137600
Chr11	17550300	1	Deletion	Frameshift	OsKitaake11g137600
Chr11	17550304	8	Deletion	Frameshift	OsKitaake11g137600
Chr11	17550319	2	Deletion	Frameshift	OsKitaake11g137600
Chr11	17550324	4	Deletion	Frameshift	OsKitaake11g137600
Chr11	17572594	1	Deletion	Frameshift	OsKitaake11g137700
Chr11	17572599	2	Deletion	Frameshift	OsKitaake11g137700
Chr11	17574755	24	Deletion	Inframe deletion	OsKitaake11g137700
Chr11	17641056	4	Deletion	Frameshift	OsKitaake11g138200
Chr11	17641602	1	Deletion	Frameshift	OsKitaake11g138300
Chr11	17665119	5	Deletion	Frameshift	OsKitaake11g138500
Chr11	17697955	4	Deletion	Frameshift	OsKitaake11g138800
Chr11	17698772	31	Deletion	Frameshift	OsKitaake11g138800
Chr11	17703124	1	Deletion	Frameshift	OsKitaake11g138850
Chr11	17703204	3	Deletion	Inframe deletion	OsKitaake11g138850
Chr11	17703357	2	Deletion	Frameshift	OsKitaake11g138850
Chr11	17726955	3	Deletion	Inframe deletion	OsKitaake11g139000
Chr11	17728120	1	Deletion	Frameshift	OsKitaake11g139000
Chr11	17798980	3	Deletion	Inframe deletion	OsKitaake11g139300
Chr11	17854875	1	Deletion	Splice donor	OsKitaake11g139800
Chr11	17874864	3	Deletion	Inframe deletion	OsKitaake11g140000
Chr11	17874989	3	Deletion	Inframe deletion	OsKitaake11g140000
Chr11	18169970	1	Deletion	Frameshift	OsKitaake11g141600
Chr11	18208441	6	Deletion	Inframe deletion	OsKitaake11g141900
Chr11	18293624	3	Deletion	Inframe deletion	OsKitaake11g142300
Chr11	18317844	12	Deletion	Inframe deletion	OsKitaake11g142400
Chr11	18335991	6	Deletion	Inframe deletion	OsKitaake11g142600
Chr11	18395308	3	Deletion	Inframe deletion	OsKitaake11g142900
Chr11	18562443	1	Deletion	Frameshift	OsKitaake11g143600
Chr11	18569933	1	Deletion	Frameshift	OsKitaake11g143800
Chr11	18644455	9	Deletion	Inframe deletion	OsKitaake11g144500
Chr11	19326456	1	Deletion	Frameshift	OsKitaake11g150200
Chr11	19332848	15	Deletion	Inframe deletion	OsKitaake11g150500
Chr11	19439363	3	Deletion	Inframe deletion	OsKitaake11g151800
Chr11	19445263	3	Deletion	Inframe deletion	OsKitaake11g151900
Chr11	19592057	14	Deletion	Frameshift	OsKitaake11g152700
Chr11	19592078	27	Deletion	Inframe deletion	OsKitaake11g152700
Chr11	19592108	3	Deletion	Inframe deletion	OsKitaake11g152700
Chr11	19592112	4	Deletion	Frameshift	OsKitaake11g152700
Chr11	19637965	1	Deletion	Frameshift	OsKitaake11g153200
Chr11	19644279	3	Deletion	Inframe deletion	OsKitaake11g153400
Chr11	19700879	27	Deletion	Inframe deletion	OsKitaake11g153800
Chr11	19777995	12	Deletion	Inframe deletion	OsKitaake11g154500
Chr11	19886931	3	Deletion	Inframe deletion	OsKitaake11g155700
Chr11	19886937	9	Deletion	Inframe deletion	OsKitaake11g155700
Chr11	19887104	6	Deletion	Inframe deletion	OsKitaake11g155700
Chr11	19887121	3	Deletion	Inframe deletion	OsKitaake11g155700
Chr11	19895295	8	Deletion	Frameshift	OsKitaake11g155800
Chr11	19895304	4	Deletion	Frameshift	OsKitaake11g155800
Chr11	19939437	12	Deletion	Inframe deletion	OsKitaake11g156450
Chr11	19950278	3	Deletion	Inframe deletion	OsKitaake11g156600
Chr11	19984995	1	Deletion	Frameshift	OsKitaake11g157100
Chr11	19988383	6	Deletion	Inframe deletion	OsKitaake11g157100
Chr11	20164877	12	Deletion	Inframe deletion	OsKitaake11g157600
Chr11	20239671	15	Deletion	Inframe deletion	OsKitaake11g158000
Chr11	20275277	3	Deletion	Inframe deletion	OsKitaake11g158300
Chr11	20279803	2	Deletion	Frameshift	OsKitaake11g158400
Chr11	20279807	1	Deletion	Frameshift	OsKitaake11g158400
Chr11	20279958	2	Deletion	Frameshift	OsKitaake11g158400
Chr11	20279963	2	Deletion	Frameshift	OsKitaake11g158400
Chr11	20279968	2	Deletion	Frameshift	OsKitaake11g158400
Chr11	20280067	1	Deletion	Frameshift	OsKitaake11g158400
Chr11	20280072	1	Deletion	Frameshift	OsKitaake11g158400
Chr11	20280075	1	Deletion	Frameshift	OsKitaake11g158400
Chr11	20280086	3	Deletion	Inframe deletion	OsKitaake11g158400
Chr11	20324984	1	Deletion	Frameshift	OsKitaake11g159101
Chr11	20362992	3	Deletion	Inframe deletion	OsKitaake11g159300
Chr11	20432713	6	Deletion	Inframe deletion	OsKitaake11g159900
Chr11	20432900	1	Deletion	Frameshift	OsKitaake11g159900
Chr11	20441176	1	Deletion	Splice acceptor	OsKitaake11g160100
Chr11	20442247	2	Deletion	Frameshift	OsKitaake11g160100
Chr11	20442250	1	Deletion	Frameshift	OsKitaake11g160100
Chr11	20443002	1	Deletion	Frameshift	OsKitaake11g160100
Chr11	20467916	6	Deletion	Inframe deletion	OsKitaake11g160300
Chr11	20467939	5	Deletion	Frameshift	OsKitaake11g160300
Chr11	20476560	6	Deletion	Inframe deletion	OsKitaake11g160500
Chr11	20548728	4	Deletion	Frameshift	OsKitaake11g160700
Chr11	20550174	26	Deletion	Frameshift	OsKitaake11g160800
Chr11	20754199	3	Deletion	Inframe deletion	OsKitaake11g163600
Chr11	20754895	5	Deletion	Frameshift	OsKitaake11g163600
Chr11	20754901	1	Deletion	Frameshift	OsKitaake11g163600
Chr11	21036933	9	Deletion	Inframe deletion	OsKitaake11g166600
Chr11	21187022	28	Deletion	Frameshift	OsKitaake11g167800
Chr11	21809445	3	Deletion	Inframe deletion	OsKitaake11g172500
Chr11	21883353	3	Deletion	Inframe deletion	OsKitaake11g173000
Chr11	22113464	8	Deletion	Frameshift	OsKitaake11g174800
Chr11	22113474	1	Deletion	Frameshift	OsKitaake11g174800
Chr11	22115134	9	Deletion	Inframe deletion	OsKitaake11g174800
Chr11	22115764	1	Deletion	Frameshift	OsKitaake11g174800
Chr11	22213848	3	Deletion	Splice donor	OsKitaake11g175900
Chr11	22249741	1	Deletion	Frameshift	OsKitaake11g176100
Chr11	22296724	3	Deletion	Inframe deletion	OsKitaake11g176600
Chr11	22300181	3	Deletion	Inframe deletion	OsKitaake11g176700
Chr11	22304086	6	Deletion	Inframe deletion	OsKitaake11g176800
Chr11	22411471	3	Deletion	Inframe deletion	OsKitaake11g177700
Chr11	22411540	1	Deletion	Frameshift	OsKitaake11g177700
Chr11	22440873	18	Deletion	Inframe deletion	OsKitaake11g178200
Chr11	22446284	20	Deletion	Frameshift	OsKitaake11g178301
Chr11	22534934	8	Deletion	Frameshift	OsKitaake11g178700
Chr11	22543277	1	Deletion	Frameshift	OsKitaake11g178801
Chr11	22543413	8	Deletion	Frameshift	OsKitaake11g178801
Chr11	22543422	5	Deletion	Frameshift	OsKitaake11g178801
Chr11	22543428	2	Deletion	Frameshift	OsKitaake11g178801
Chr11	22543475	7	Deletion	Frameshift	OsKitaake11g178801
Chr11	22543483	2	Deletion	Frameshift	OsKitaake11g178801
Chr11	22586697	3	Deletion	Inframe deletion	OsKitaake11g179300
Chr11	22586890	6	Deletion	Inframe deletion	OsKitaake11g179300
Chr11	22705591	1	Deletion	Frameshift	OsKitaake11g180000
Chr11	22705594	2	Deletion	Frameshift	OsKitaake11g180000
Chr11	22741928	6	Deletion	Inframe deletion	OsKitaake11g180300
Chr11	22880914	1	Deletion	Frameshift	OsKitaake11g181000
Chr11	22892275	1	Deletion	Frameshift	OsKitaake11g181200
Chr11	22892282	1	Deletion	Frameshift	OsKitaake11g181200
Chr11	22892287	1	Deletion	Frameshift	OsKitaake11g181200
Chr11	22892300	3	Deletion	Inframe deletion	OsKitaake11g181200
Chr11	22892571	2	Deletion	Frameshift	OsKitaake11g181200
Chr11	22917330	6	Deletion	Inframe deletion	OsKitaake11g181400
Chr11	22930656	3	Deletion	Inframe deletion	OsKitaake11g181600
Chr11	22930661	3	Deletion	Inframe deletion	OsKitaake11g181600
Chr11	22930810	3	Deletion	Inframe deletion	OsKitaake11g181600
Chr11	23070415	6	Deletion	Splice acceptor	OsKitaake11g183000
Chr11	23073324	3	Deletion	Inframe deletion	OsKitaake11g183000
Chr11	23073698	1	Deletion	Frameshift	OsKitaake11g183000
Chr11	23091402	3	Deletion	Inframe deletion	OsKitaake11g183200
Chr11	23091408	3	Deletion	Inframe deletion	OsKitaake11g183200
Chr11	23091510	6	Deletion	Inframe deletion	OsKitaake11g183200
Chr11	23091519	2	Deletion	Frameshift	OsKitaake11g183200
Chr11	23091523	1	Deletion	Frameshift	OsKitaake11g183200
Chr11	23091572	6	Deletion	Inframe deletion	OsKitaake11g183200
Chr11	23091623	3	Deletion	Inframe deletion	OsKitaake11g183200
Chr11	23100481	2	Deletion	Frameshift	OsKitaake11g183300
Chr11	23100485	1	Deletion	Frameshift	OsKitaake11g183300
Chr11	23100489	3	Deletion	Inframe deletion	OsKitaake11g183300
Chr11	23184715	27	Deletion	Inframe deletion	OsKitaake11g183900
Chr11	23186394	3	Deletion	Inframe deletion	OsKitaake11g184000
Chr11	23187014	9	Deletion	Frameshift	OsKitaake11g184000
Chr11	23191566	24	Deletion	Inframe deletion	OsKitaake11g184100
Chr11	23205289	1	Deletion	Frameshift	OsKitaake11g184450
Chr11	23225675	3	Deletion	Inframe deletion	OsKitaake11g184750
Chr11	23232413	6	Deletion	Inframe deletion	OsKitaake11g184851
Chr11	23287485	1	Deletion	Frameshift	OsKitaake11g185200
Chr11	23301822	1	Deletion	Frameshift	OsKitaake11g185600
Chr11	23332946	8	Deletion	Frameshift	OsKitaake11g185900
Chr11	23332960	1	Deletion	Frameshift	OsKitaake11g185900
Chr11	23332963	3	Deletion	Inframe deletion	OsKitaake11g185900
Chr11	23332970	2	Deletion	Frameshift	OsKitaake11g185900
Chr11	23435165	3	Deletion	Inframe deletion	OsKitaake11g186700
Chr11	23435179	3	Deletion	Inframe deletion	OsKitaake11g186700
Chr11	23435223	3	Deletion	Inframe deletion	OsKitaake11g186700
Chr11	23435435	1	Deletion	Frameshift	OsKitaake11g186700
Chr11	23435440	2	Deletion	Frameshift	OsKitaake11g186700
Chr11	23453603	15	Deletion	Inframe deletion	OsKitaake11g187000
Chr11	23467864	3	Deletion	Inframe deletion	OsKitaake11g187200
Chr11	23750900	3	Deletion	Inframe deletion	OsKitaake11g189800
Chr11	23752298	3	Deletion	Inframe deletion	OsKitaake11g189800
Chr11	23977317	1	Deletion	Frameshift	OsKitaake11g192500
Chr11	23983155	3	Deletion	Inframe deletion	OsKitaake11g192500
Chr11	23991506	1	Deletion	Frameshift	OsKitaake11g192700
Chr11	23992164	1	Deletion	Frameshift	OsKitaake11g192700
Chr11	23994320	3	Deletion	Inframe deletion	OsKitaake11g192700
Chr11	23996563	1	Deletion	Frameshift	OsKitaake11g192800
Chr11	23996566	1	Deletion	Frameshift	OsKitaake11g192800
Chr11	23996570	2	Deletion	Frameshift	OsKitaake11g192800
Chr11	24188004	1	Deletion	Frameshift	OsKitaake11g194800
Chr11	24188083	6	Deletion	Inframe deletion	OsKitaake11g194800
Chr11	24357097	3	Deletion	Inframe deletion	OsKitaake11g195700
Chr11	24363479	1	Deletion	Frameshift	OsKitaake11g195800
Chr11	24363484	11	Deletion	Frameshift	OsKitaake11g195800
Chr11	24363586	1	Deletion	Frameshift	OsKitaake11g195800
Chr11	24363601	3	Deletion	Inframe deletion	OsKitaake11g195800
Chr11	24363874	1	Deletion	Frameshift	OsKitaake11g195800
Chr11	24363878	2	Deletion	Frameshift	OsKitaake11g195800
Chr11	24363881	1	Deletion	Frameshift	OsKitaake11g195800
Chr11	24683008	3	Deletion	Inframe deletion	OsKitaake11g200100
Chr11	24762855	15	Deletion	Inframe deletion	OsKitaake11g201100
Chr11	24764493	9	Deletion	Inframe deletion	OsKitaake11g201100
Chr11	24789533	6	Deletion	Inframe deletion	OsKitaake11g201400
Chr11	24898776	5	Deletion	Frameshift	OsKitaake11g202701
Chr11	25113168	1	Deletion	Frameshift	OsKitaake11g203030
Chr11	25114286	1	Deletion	Frameshift	OsKitaake11g203030
Chr11	25114506	1	Deletion	Frameshift	OsKitaake11g203030
Chr11	25114973	1	Deletion	Frameshift	OsKitaake11g203030
Chr11	25115038	1	Deletion	Frameshift	OsKitaake11g203030
Chr11	25326065	15	Deletion	Inframe deletion	OsKitaake11g203300
Chr11	25326248	2	Deletion	Splice donor	OsKitaake11g203300
Chr11	25369533	3	Deletion	Inframe deletion	OsKitaake11g204050
Chr11	25369543	3	Deletion	Inframe deletion	OsKitaake11g204050
Chr11	25629692	6	Deletion	Inframe deletion	OsKitaake11g206900
Chr11	25629701	3	Deletion	Inframe deletion	OsKitaake11g206900
Chr11	25629706	3	Deletion	Inframe deletion	OsKitaake11g206900
Chr11	25978599	9	Deletion	Inframe deletion	OsKitaake11g209300
Chr11	25994290	6	Deletion	Inframe deletion	OsKitaake11g209500
Chr11	26016055	3	Deletion	Inframe deletion	OsKitaake11g209800
Chr11	26016273	12	Deletion	Inframe deletion	OsKitaake11g209800
Chr11	26061356	3	Deletion	Inframe deletion	OsKitaake11g210500
Chr11	26105670	6	Deletion	Inframe deletion	OsKitaake11g210900
Chr11	26105693	6	Deletion	Inframe deletion	OsKitaake11g210900
Chr11	26106082	3	Deletion	Inframe deletion	OsKitaake11g210900
Chr11	26106092	9	Deletion	Inframe deletion	OsKitaake11g210900
Chr11	26108188	2	Deletion	Frameshift	OsKitaake11g210900
Chr11	26108193	3	Deletion	Inframe deletion	OsKitaake11g210900
Chr11	26108198	1	Deletion	Frameshift	OsKitaake11g210900
Chr11	26108340	1	Deletion	Frameshift	OsKitaake11g210900
Chr11	26108344	1	Deletion	Frameshift	OsKitaake11g210900
Chr11	26108346	1	Deletion	Frameshift	OsKitaake11g210900
Chr11	26108417	3	Deletion	Inframe deletion	OsKitaake11g210900
Chr11	26108534	1	Deletion	Frameshift	OsKitaake11g210900
Chr11	26151988	3	Deletion	Inframe deletion	OsKitaake11g211400
Chr11	26152178	3	Deletion	Inframe deletion	OsKitaake11g211400
Chr11	26201153	21	Deletion	Inframe deletion	OsKitaake11g211600
Chr11	26567047	1	Deletion	Frameshift	OsKitaake11g216000
Chr11	26567050	3	Deletion	Inframe deletion	OsKitaake11g216000
Chr11	26567160	2	Deletion	Frameshift	OsKitaake11g216000
Chr11	26567163	1	Deletion	Frameshift	OsKitaake11g216000
Chr11	26647661	3	Deletion	Inframe deletion	OsKitaake11g216900
Chr11	26652475	7	Deletion	Frameshift	OsKitaake11g216900
Chr11	27029642	48	Deletion	Inframe deletion	OsKitaake11g220300
Chr11	27245426	3	Deletion	Inframe deletion	OsKitaake11g222700
Chr11	27246638	12	Deletion	Inframe deletion	OsKitaake11g222700
Chr11	27263401	6	Deletion	Inframe deletion	OsKitaake11g222900
Chr11	27533010	2	Deletion	Frameshift	OsKitaake11g224400
Chr11	27664353	9	Deletion	Inframe deletion	OsKitaake11g225400
Chr11	27664447	2	Deletion	Frameshift	OsKitaake11g225400
Chr11	27664452	1	Deletion	Frameshift	OsKitaake11g225400
Chr11	27714435	6	Deletion	Inframe deletion	OsKitaake11g226300
Chr11	27714526	6	Deletion	Inframe deletion	OsKitaake11g226300
Chr11	27742476	1	Deletion	Frameshift	OsKitaake11g226400
Chr11	27742478	2	Deletion	Frameshift	OsKitaake11g226400
Chr11	27772618	6	Deletion	Inframe deletion	OsKitaake11g226700
Chr11	27782274	3	Deletion	Inframe deletion	OsKitaake11g226900
Chr11	27782281	1	Deletion	Frameshift	OsKitaake11g226900
Chr11	27784536	2	Deletion	Frameshift	OsKitaake11g226900
Chr11	27784539	1	Deletion	Frameshift	OsKitaake11g226900
Chr11	27889230	1	Deletion	Frameshift	OsKitaake11g228400
Chr11	27944957	1	Deletion	Frameshift	OsKitaake11g229100
Chr11	27945050	2	Deletion	Frameshift	OsKitaake11g229100
Chr11	27945055	1	Deletion	Frameshift	OsKitaake11g229100
Chr11	27945348	1	Deletion	Frameshift	OsKitaake11g229100
Chr11	27945351	2	Deletion	Frameshift	OsKitaake11g229100
Chr11	27945355	1	Deletion	Frameshift	OsKitaake11g229100
Chr11	27945358	2	Deletion	Frameshift	OsKitaake11g229100
Chr11	27945401	3	Deletion	Inframe deletion	OsKitaake11g229100
Chr11	27945438	6	Deletion	Inframe deletion	OsKitaake11g229100
Chr11	27945748	1	Deletion	Frameshift	OsKitaake11g229100
Chr11	28004673	1	Deletion	Frameshift	OsKitaake11g230100
Chr11	28055968	9	Deletion	Inframe deletion	OsKitaake11g230300
Chr11	28155613	4	Deletion	Frameshift	OsKitaake11g231100
Chr11	28221337	3	Deletion	Inframe deletion	OsKitaake11g231700
Chr11	28221774	1	Deletion	Frameshift	OsKitaake11g231700
Chr11	28235954	1	Deletion	Frameshift	OsKitaake11g232000
Chr11	28235956	5	Deletion	Frameshift	OsKitaake11g232000
Chr11	28235986	1	Deletion	Frameshift	OsKitaake11g232000
Chr11	28235988	2	Deletion	Frameshift	OsKitaake11g232000
Chr11	28236364	12	Deletion	Inframe deletion	OsKitaake11g232000
Chr11	28273933	3	Deletion	Inframe deletion	OsKitaake11g232100
Chr11	28273959	5	Deletion	Frameshift	OsKitaake11g232100
Chr11	28273965	1	Deletion	Frameshift	OsKitaake11g232100
Chr11	28274555	1	Deletion	Frameshift	OsKitaake11g232100
Chr11	28274574	3	Deletion	Inframe deletion	OsKitaake11g232100
Chr11	28733687	1	Deletion	Frameshift	OsKitaake11g235300
Chr11	28739056	2	Deletion	Frameshift	OsKitaake11g235400
Chr11	28739060	9	Deletion	Inframe deletion	OsKitaake11g235400
Chr11	28739070	1	Deletion	Frameshift	OsKitaake11g235400
Chr11	28739082	3	Deletion	Inframe deletion	OsKitaake11g235400
Chr11	28740843	3	Deletion	Inframe deletion	OsKitaake11g235400
Chr11	28778019	6	Deletion	Inframe deletion	OsKitaake11g235600
Chr11	28877509	3	Deletion	Inframe deletion	OsKitaake11g236500
Chr11	28949598	3	Deletion	Inframe deletion	OsKitaake11g236700
Chr11	28972703	16	Deletion	Frameshift	OsKitaake11g237000
Chr11	29051449	6	Deletion	Inframe deletion	OsKitaake11g238000
Chr11	29053810	1	Deletion	Frameshift	OsKitaake11g238000
Chr11	29061655	1	Deletion	Frameshift	OsKitaake11g238100
Chr11	29061694	1	Deletion	Frameshift	OsKitaake11g238100
Chr11	29061855	1	Deletion	Frameshift	OsKitaake11g238100
Chr11	29061946	3	Deletion	Inframe deletion	OsKitaake11g238100
Chr11	29062114	5	Deletion	Frameshift	OsKitaake11g238100
Chr11	29062121	1	Deletion	Frameshift	OsKitaake11g238100
Chr11	29062124	1	Deletion	Frameshift	OsKitaake11g238100
Chr11	29062126	2	Deletion	Frameshift	OsKitaake11g238100
Chr11	29062304	1	Deletion	Frameshift	OsKitaake11g238100
Chr11	29062373	1	Deletion	Frameshift	OsKitaake11g238100
Chr11	29062606	1	Deletion	Frameshift	OsKitaake11g238100
Chr11	29063579	1	Deletion	Frameshift	OsKitaake11g238100
Chr11	29198127	3	Deletion	Inframe deletion	OsKitaake11g239400
Chr11	29389851	3	Deletion	Inframe deletion	OsKitaake11g240400
Chr11	29415313	2	Deletion	Frameshift	OsKitaake11g240800
Chr11	29428781	5	Deletion	Frameshift	OsKitaake11g241100
Chr11	29435455	6	Deletion	Inframe deletion	OsKitaake11g241400
Chr11	29435505	3	Deletion	Inframe deletion	OsKitaake11g241400
Chr11	29481635	1	Deletion	Frameshift	OsKitaake11g242500
Chr11	29543905	5	Deletion	Frameshift	OsKitaake11g243300
Chr11	29543911	1	Deletion	Frameshift	OsKitaake11g243300
Chr12	195444	1	Deletion	Frameshift	OsKitaake12g002200
Chr12	208633	1	Deletion	Frameshift	OsKitaake12g002400
Chr12	221884	79	Deletion	Splice donor	OsKitaake12g002600
Chr12	226657	3	Deletion	Inframe deletion	OsKitaake12g002700
Chr12	266154	6	Deletion	Inframe deletion	OsKitaake12g002901
Chr12	330800	8	Deletion	Frameshift	OsKitaake12g003800
Chr12	330811	7	Deletion	Frameshift	OsKitaake12g003800
Chr12	405532	33	Deletion	Inframe deletion	OsKitaake12g004900
Chr12	545378	3	Deletion	Inframe deletion	OsKitaake12g006600
Chr12	552742	14	Deletion	Splice acceptor	OsKitaake12g006800
Chr12	725101	1	Deletion	Frameshift	OsKitaake12g010000
Chr12	754330	3	Deletion	Inframe deletion	OsKitaake12g010500
Chr12	875985	8	Deletion	Frameshift	OsKitaake12g012600
Chr12	995243	4	Deletion	Frameshift	OsKitaake12g014800
Chr12	1072574	2	Deletion	Frameshift	OsKitaake12g016100
Chr12	1142203	61	Deletion	Frameshift	OsKitaake12g016633
Chr12	1201899	3	Deletion	Inframe deletion	OsKitaake12g017200
Chr12	1209312	12	Deletion	Inframe deletion	OsKitaake12g017300
Chr12	1209507	22	Deletion	Frameshift	OsKitaake12g017300
Chr12	1223326	2	Deletion	Frameshift	OsKitaake12g017600
Chr12	1224586	5	Deletion	Frameshift	OsKitaake12g017700
Chr12	1421780	3	Deletion	Inframe deletion	OsKitaake12g021400
Chr12	1462441	1	Deletion	Frameshift	OsKitaake12g021900
Chr12	1483200	2	Deletion	Frameshift	OsKitaake12g022200
Chr12	1546924	9	Deletion	Inframe deletion	OsKitaake12g023366
Chr12	1547118	3	Deletion	Inframe deletion	OsKitaake12g023366
Chr12	1585924	2	Deletion	Frameshift	OsKitaake12g024201
Chr12	1587739	1	Deletion	Frameshift	OsKitaake12g024201
Chr12	1709937	15	Deletion	Inframe deletion	OsKitaake12g025700
Chr12	1729999	3	Deletion	Inframe deletion	OsKitaake12g026100
Chr12	1939441	3	Deletion	Inframe deletion	OsKitaake12g030200
Chr12	1953132	3	Deletion	Inframe deletion	OsKitaake12g030400
Chr12	2010708	1	Deletion	Frameshift	OsKitaake12g031600
Chr12	2011157	6	Deletion	Inframe deletion	OsKitaake12g031600
Chr12	2018149	2	Deletion	Frameshift	OsKitaake12g031900
Chr12	2072032	3	Deletion	Inframe deletion	OsKitaake12g032900
Chr12	2072037	2	Deletion	Frameshift	OsKitaake12g032900
Chr12	2072040	5	Deletion	Frameshift	OsKitaake12g032900
Chr12	2112873	6	Deletion	Inframe deletion	OsKitaake12g033400
Chr12	2113066	2	Deletion	Frameshift	OsKitaake12g033400
Chr12	2214005	1	Deletion	Frameshift	OsKitaake12g034400
Chr12	2264395	2	Deletion	Frameshift	OsKitaake12g035050
Chr12	2324992	1	Deletion	Frameshift	OsKitaake12g035700
Chr12	2397652	1	Deletion	Frameshift	OsKitaake12g036600
Chr12	2403042	6	Deletion	Inframe deletion	OsKitaake12g036800
Chr12	2403082	3	Deletion	Inframe deletion	OsKitaake12g036800
Chr12	2434727	6	Deletion	Inframe deletion	OsKitaake12g037000
Chr12	2453717	1	Deletion	Frameshift	OsKitaake12g037250
Chr12	2574772	1	Deletion	Frameshift	OsKitaake12g038250
Chr12	3267338	41	Deletion	Frameshift	OsKitaake12g046400
Chr12	3267794	1	Deletion	Frameshift	OsKitaake12g046400
Chr12	3281004	15	Deletion	Inframe deletion	OsKitaake12g046600
Chr12	3372959	2	Deletion	Frameshift	OsKitaake12g047500
Chr12	3412325	23	Deletion	Frameshift	OsKitaake12g048300
Chr12	3504193	12	Deletion	Inframe deletion	OsKitaake12g049300
Chr12	3702686	3	Deletion	Inframe deletion	OsKitaake12g051533
Chr12	3710898	2	Deletion	Frameshift	OsKitaake12g051600
Chr12	3710901	1	Deletion	Frameshift	OsKitaake12g051600
Chr12	3741275	21	Deletion	Inframe deletion	OsKitaake12g052100
Chr12	3760889	9	Deletion	Inframe deletion	OsKitaake12g052300
Chr12	3802116	3	Deletion	Inframe deletion	OsKitaake12g052600
Chr12	3815525	15	Deletion	Inframe deletion	OsKitaake12g052800
Chr12	3818247	1	Deletion	Frameshift	OsKitaake12g052800
Chr12	3835315	11	Deletion	Frameshift	OsKitaake12g053000
Chr12	3835453	3	Deletion	Inframe deletion	OsKitaake12g053000
Chr12	3836178	3	Deletion	Inframe deletion	OsKitaake12g053000
Chr12	3845313	6	Deletion	Inframe deletion	OsKitaake12g053100
Chr12	3869656	3	Deletion	Inframe deletion	OsKitaake12g053300
Chr12	4029173	11	Deletion	Frameshift	OsKitaake12g054800
Chr12	4029186	4	Deletion	Frameshift	OsKitaake12g054800
Chr12	4029192	2	Deletion	Frameshift	OsKitaake12g054800
Chr12	4029195	4	Deletion	Frameshift	OsKitaake12g054800
Chr12	4029473	6	Deletion	Inframe deletion	OsKitaake12g054800
Chr12	4029592	3	Deletion	Inframe deletion	OsKitaake12g054800
Chr12	4029770	6	Deletion	Inframe deletion	OsKitaake12g054800
Chr12	4030010	9	Deletion	Inframe deletion	OsKitaake12g054800
Chr12	4030504	9	Deletion	Inframe deletion	OsKitaake12g054800
Chr12	4056175	1	Deletion	Frameshift	OsKitaake12g055200
Chr12	4056177	2	Deletion	Frameshift	OsKitaake12g055200
Chr12	4078513	9	Deletion	Inframe deletion	OsKitaake12g055500
Chr12	4078713	2	Deletion	Frameshift	OsKitaake12g055500
Chr12	4078716	1	Deletion	Frameshift	OsKitaake12g055500
Chr12	4078719	2	Deletion	Frameshift	OsKitaake12g055500
Chr12	4078722	1	Deletion	Frameshift	OsKitaake12g055500
Chr12	4092657	9	Deletion	Inframe deletion	OsKitaake12g055800
Chr12	4093375	5	Deletion	Frameshift	OsKitaake12g055900
Chr12	4093683	8	Deletion	Frameshift	OsKitaake12g055900
Chr12	4150403	1	Deletion	Frameshift	OsKitaake12g056700
Chr12	4150563	12	Deletion	Inframe deletion	OsKitaake12g056700
Chr12	4150882	3	Deletion	Inframe deletion	OsKitaake12g056700
Chr12	4150897	2	Deletion	Frameshift	OsKitaake12g056700
Chr12	4150900	1	Deletion	Frameshift	OsKitaake12g056700
Chr12	4151360	8	Deletion	Frameshift	OsKitaake12g056700
Chr12	4151369	1	Deletion	Frameshift	OsKitaake12g056700
Chr12	4184084	1	Deletion	Frameshift	OsKitaake12g057300
Chr12	4261385	4	Deletion	Splice donor	OsKitaake12g058000
Chr12	4263144	3	Deletion	Inframe deletion	OsKitaake12g058100
Chr12	4269271	3	Deletion	Inframe deletion	OsKitaake12g058200
Chr12	4269325	6	Deletion	Inframe deletion	OsKitaake12g058200
Chr12	4299993	13	Deletion	Frameshift	OsKitaake12g058950
Chr12	4596072	6	Deletion	Inframe deletion	OsKitaake12g060800
Chr12	4596104	3	Deletion	Inframe deletion	OsKitaake12g060800
Chr12	4615518	3	Deletion	Inframe deletion	OsKitaake12g061100
Chr12	4746393	15	Deletion	Frameshift	OsKitaake12g061900
Chr12	4880104	7	Deletion	Frameshift	OsKitaake12g063100
Chr12	4901780	1	Deletion	Frameshift	OsKitaake12g063200
Chr12	4941810	2	Deletion	Frameshift	OsKitaake12g063500
Chr12	4945178	82	Deletion	Frameshift	OsKitaake12g063500
Chr12	5046298	2	Deletion	Frameshift	OsKitaake12g064300
Chr12	5046972	2	Deletion	Splice acceptor	OsKitaake12g064300
Chr12	5153188	6	Deletion	Inframe deletion	OsKitaake12g065300
Chr12	5233490	4	Deletion	Frameshift	OsKitaake12g066100
Chr12	5239365	3	Deletion	Inframe deletion	OsKitaake12g066200
Chr12	5498637	3	Deletion	Inframe deletion	OsKitaake12g067300
Chr12	5540003	1	Deletion	Frameshift	OsKitaake12g067800
Chr12	5540028	6	Deletion	Inframe deletion	OsKitaake12g067800
Chr12	5542598	41	Deletion	Splice donor	OsKitaake12g067800
Chr12	5572890	2	Deletion	Frameshift	OsKitaake12g068000
Chr12	5575628	1	Deletion	Frameshift	OsKitaake12g068100
Chr12	5575630	2	Deletion	Frameshift	OsKitaake12g068100
Chr12	5575691	3	Deletion	Inframe deletion	OsKitaake12g068100
Chr12	5575699	9	Deletion	Inframe deletion	OsKitaake12g068100
Chr12	5575709	1	Deletion	Frameshift	OsKitaake12g068100
Chr12	5575713	1	Deletion	Frameshift	OsKitaake12g068100
Chr12	5575718	1	Deletion	Frameshift	OsKitaake12g068100
Chr12	5575720	1	Deletion	Frameshift	OsKitaake12g068100
Chr12	5575722	5	Deletion	Frameshift	OsKitaake12g068100
Chr12	5582196	2	Deletion	Frameshift	OsKitaake12g068000
Chr12	5582224	4	Deletion	Frameshift	OsKitaake12g068000
Chr12	5615433	32	Deletion	Frameshift	OsKitaake12g068500
Chr12	5619116	11	Deletion	Frameshift	OsKitaake12g068500
Chr12	5619264	17	Deletion	Frameshift	OsKitaake12g068500
Chr12	5619732	19	Deletion	Frameshift	OsKitaake12g068500
Chr12	5648530	4	Deletion	Frameshift	OsKitaake12g068701
Chr12	5723567	3	Deletion	Inframe deletion	OsKitaake12g069326
Chr12	5723841	3	Deletion	Inframe deletion	OsKitaake12g069326
Chr12	5723853	3	Deletion	Inframe deletion	OsKitaake12g069326
Chr12	5724269	5	Deletion	Frameshift	OsKitaake12g069326
Chr12	5724277	1	Deletion	Frameshift	OsKitaake12g069326
Chr12	5758551	2	Deletion	Frameshift	OsKitaake12g069850
Chr12	5796462	2	Deletion	Frameshift	OsKitaake12g070000
Chr12	5796611	1	Deletion	Frameshift	OsKitaake12g070000
Chr12	5796623	1	Deletion	Frameshift	OsKitaake12g070000
Chr12	5796626	4	Deletion	Frameshift	OsKitaake12g070000
Chr12	5796632	1	Deletion	Frameshift	OsKitaake12g070000
Chr12	5796637	3	Deletion	Inframe deletion	OsKitaake12g070000
Chr12	5797424	1	Deletion	Frameshift	OsKitaake12g070000
Chr12	5797430	3	Deletion	Inframe deletion	OsKitaake12g070000
Chr12	5797732	2	Deletion	Frameshift	OsKitaake12g070000
Chr12	5797873	19	Deletion	Frameshift	OsKitaake12g070000
Chr12	5797893	2	Deletion	Frameshift	OsKitaake12g070000
Chr12	5797899	15	Deletion	Inframe deletion	OsKitaake12g070000
Chr12	5797915	3	Deletion	Inframe deletion	OsKitaake12g070000
Chr12	5797923	2	Deletion	Frameshift	OsKitaake12g070000
Chr12	5797928	1	Deletion	Frameshift	OsKitaake12g070000
Chr12	5797931	3	Deletion	Inframe deletion	OsKitaake12g070000
Chr12	5798476	3	Deletion	Inframe deletion	OsKitaake12g070000
Chr12	5872015	6	Deletion	Inframe deletion	OsKitaake12g070800
Chr12	6134416	3	Deletion	Inframe deletion	OsKitaake12g071600
Chr12	6137204	1	Deletion	Frameshift	OsKitaake12g071600
Chr12	6179867	4	Deletion	Frameshift	OsKitaake12g071525
Chr12	6179872	2	Deletion	Frameshift	OsKitaake12g071525
Chr12	6179975	6	Deletion	Inframe deletion	OsKitaake12g071525
Chr12	6429898	3	Deletion	Inframe deletion	OsKitaake12g074000
Chr12	6503601	7	Deletion	Frameshift	OsKitaake12g074800
Chr12	6503962	2	Deletion	Frameshift	OsKitaake12g074800
Chr12	6516710	3	Deletion	Inframe deletion	OsKitaake12g075000
Chr12	6522985	4	Deletion	Frameshift	OsKitaake12g075100
Chr12	6523024	3	Deletion	Inframe deletion	OsKitaake12g075100
Chr12	6524624	9	Deletion	Inframe deletion	OsKitaake12g075201
Chr12	6524786	2	Deletion	Frameshift	OsKitaake12g075201
Chr12	6605345	1	Deletion	Frameshift	OsKitaake12g075700
Chr12	6613452	3	Deletion	Inframe deletion	OsKitaake12g075800
Chr12	6807447	6	Deletion	Inframe deletion	OsKitaake12g077100
Chr12	6859108	7	Deletion	Frameshift	OsKitaake12g078050
Chr12	6859118	1	Deletion	Frameshift	OsKitaake12g078050
Chr12	6859122	1	Deletion	Frameshift	OsKitaake12g078050
Chr12	6859132	1	Deletion	Frameshift	OsKitaake12g078050
Chr12	6859136	2	Deletion	Frameshift	OsKitaake12g078050
Chr12	7067492	12	Deletion	Inframe deletion	OsKitaake12g079500
Chr12	7269677	3	Deletion	Inframe deletion	OsKitaake12g080600
Chr12	7269820	6	Deletion	Inframe deletion	OsKitaake12g080600
Chr12	7269841	2	Deletion	Frameshift	OsKitaake12g080600
Chr12	7269844	1	Deletion	Frameshift	OsKitaake12g080600
Chr12	7269871	3	Deletion	Inframe deletion	OsKitaake12g080600
Chr12	7270005	1	Deletion	Frameshift	OsKitaake12g080600
Chr12	7327766	1	Deletion	Frameshift	OsKitaake12g080800
Chr12	7327768	2	Deletion	Frameshift	OsKitaake12g080800
Chr12	7327941	3	Deletion	Inframe deletion	OsKitaake12g080800
Chr12	7345557	9	Deletion	Inframe deletion	OsKitaake12g080900
Chr12	7352607	3	Deletion	Inframe deletion	OsKitaake12g081000
Chr12	7395264	9	Deletion	Inframe deletion	OsKitaake12g081100
Chr12	7395838	7	Deletion	Frameshift	OsKitaake12g081100
Chr12	7395878	1	Deletion	Frameshift	OsKitaake12g081100
Chr12	7399031	8	Deletion	Frameshift	OsKitaake12g081200
Chr12	7399044	5	Deletion	Frameshift	OsKitaake12g081200
Chr12	7399050	1	Deletion	Frameshift	OsKitaake12g081200
Chr12	7399053	4	Deletion	Frameshift	OsKitaake12g081200
Chr12	7413221	12	Deletion	Inframe deletion	OsKitaake12g081300
Chr12	7518910	6	Deletion	Inframe deletion	OsKitaake12g082100
Chr12	7683555	3	Deletion	Inframe deletion	OsKitaake12g083200
Chr12	7761313	7	Deletion	Frameshift	OsKitaake12g083600
Chr12	7761322	7	Deletion	Frameshift	OsKitaake12g083600
Chr12	7761331	3	Deletion	Stop gained	OsKitaake12g083600
Chr12	8323393	3	Deletion	Inframe deletion	OsKitaake12g086100
Chr12	8332635	6	Deletion	Inframe deletion	OsKitaake12g086300
Chr12	8332699	12	Deletion	Inframe deletion	OsKitaake12g086300
Chr12	8332813	16	Deletion	Frameshift	OsKitaake12g086300
Chr12	8332832	17	Deletion	Frameshift	OsKitaake12g086300
Chr12	8332851	15	Deletion	Inframe deletion	OsKitaake12g086300
Chr12	8365282	9	Deletion	Inframe deletion	OsKitaake12g086600
Chr12	8390241	2	Deletion	Frameshift	OsKitaake12g087100
Chr12	8390607	9	Deletion	Inframe deletion	OsKitaake12g087100
Chr12	8400425	3	Deletion	Inframe deletion	OsKitaake12g087200
Chr12	8500216	1	Deletion	Frameshift	OsKitaake12g087500
Chr12	8500914	1	Deletion	Frameshift	OsKitaake12g087500
Chr12	8500920	1	Deletion	Frameshift	OsKitaake12g087500
Chr12	8500923	1	Deletion	Frameshift	OsKitaake12g087500
Chr12	9359341	1	Deletion	Frameshift	OsKitaake12g091300
Chr12	9380985	13	Deletion	Frameshift	OsKitaake12g091500
Chr12	9560678	1	Deletion	Frameshift	OsKitaake12g092300
Chr12	9560871	6	Deletion	Inframe deletion	OsKitaake12g092300
Chr12	9560881	2	Deletion	Frameshift	OsKitaake12g092300
Chr12	9587122	3	Deletion	Inframe deletion	OsKitaake12g092500
Chr12	9587157	1	Deletion	Frameshift	OsKitaake12g092500
Chr12	9626112	3	Deletion	Inframe deletion	OsKitaake12g092800
Chr12	9630310	3	Deletion	Inframe deletion	OsKitaake12g092900
Chr12	9648568	7	Deletion	Frameshift	OsKitaake12g093100
Chr12	9648589	1	Deletion	Frameshift	OsKitaake12g093100
Chr12	9648593	1	Deletion	Frameshift	OsKitaake12g093100
Chr12	9648602	1	Deletion	Frameshift	OsKitaake12g093100
Chr12	9648606	1	Deletion	Frameshift	OsKitaake12g093100
Chr12	9648608	4	Deletion	Frameshift	OsKitaake12g093100
Chr12	9717395	2	Deletion	Frameshift	OsKitaake12g093600
Chr12	10321234	8	Deletion	Frameshift	OsKitaake12g096800
Chr12	10321244	1	Deletion	Frameshift	OsKitaake12g096800
Chr12	10329211	1	Deletion	Frameshift	OsKitaake12g096900
Chr12	10329219	1	Deletion	Frameshift	OsKitaake12g096900
Chr12	10329221	1	Deletion	Frameshift	OsKitaake12g096900
Chr12	10331187	2	Deletion	Splice donor	OsKitaake12g096900
Chr12	10332158	9	Deletion	Inframe deletion	OsKitaake12g096900
Chr12	10355811	9	Deletion	Inframe deletion	OsKitaake12g097100
Chr12	10877521	1	Deletion	Frameshift	OsKitaake12g101100
Chr12	10939128	1	Deletion	Frameshift	OsKitaake12g101400
Chr12	12715504	1	Deletion	Frameshift	OsKitaake12g107700
Chr12	12847822	6	Deletion	Inframe deletion	OsKitaake12g108300
Chr12	12936430	36	Deletion	Inframe deletion	OsKitaake12g108600
Chr12	13114272	3	Deletion	Inframe deletion	OsKitaake12g109400
Chr12	13118861	2	Deletion	Frameshift	OsKitaake12g109475
Chr12	13122755	1	Deletion	Frameshift	OsKitaake12g109550
Chr12	13123501	1	Deletion	Frameshift	OsKitaake12g109550
Chr12	13146982	1	Deletion	Frameshift	OsKitaake12g109625
Chr12	13146995	2	Deletion	Frameshift	OsKitaake12g109625
Chr12	13147002	5	Deletion	Frameshift	OsKitaake12g109625
Chr12	13147011	2	Deletion	Frameshift	OsKitaake12g109625
Chr12	13147021	1	Deletion	Frameshift	OsKitaake12g109625
Chr12	13147023	1	Deletion	Frameshift	OsKitaake12g109625
Chr12	13147033	2	Deletion	Frameshift	OsKitaake12g109625
Chr12	13147036	1	Deletion	Frameshift	OsKitaake12g109625
Chr12	13147043	1	Deletion	Frameshift	OsKitaake12g109625
Chr12	13147136	1	Deletion	Frameshift	OsKitaake12g109625
Chr12	13147158	2	Deletion	Frameshift	OsKitaake12g109625
Chr12	13147161	1	Deletion	Frameshift	OsKitaake12g109625
Chr12	13147168	1	Deletion	Frameshift	OsKitaake12g109625
Chr12	13147185	1	Deletion	Frameshift	OsKitaake12g109625
Chr12	13147467	2	Deletion	Frameshift	OsKitaake12g109625
Chr12	13147472	1	Deletion	Frameshift	OsKitaake12g109625
Chr12	13147487	1	Deletion	Frameshift	OsKitaake12g109625
Chr12	13270919	6	Deletion	Inframe deletion	OsKitaake12g110300
Chr12	13321532	8	Deletion	Frameshift	OsKitaake12g110650
Chr12	13333153	1	Deletion	Frameshift	OsKitaake12g110800
Chr12	13434975	3	Deletion	Inframe deletion	OsKitaake12g111400
Chr12	13481311	9	Deletion	Inframe deletion	OsKitaake12g111500
Chr12	13499284	1	Deletion	Frameshift	OsKitaake12g111600
Chr12	13890167	3	Deletion	Inframe deletion	OsKitaake12g113900
Chr12	13890577	3	Deletion	Inframe deletion	OsKitaake12g113900
Chr12	14221242	2	Deletion	Frameshift	OsKitaake12g115500
Chr12	14297701	1	Deletion	Frameshift	OsKitaake12g115700
Chr12	14303001	19	Deletion	Frameshift	OsKitaake12g115750
Chr12	14804624	1	Deletion	Frameshift	OsKitaake12g117600
Chr12	15007035	35	Deletion	Stop lost	OsKitaake12g118300
Chr12	15570807	1	Deletion	Frameshift	OsKitaake12g120800
Chr12	15642836	11	Deletion	Frameshift	OsKitaake12g121000
Chr12	15647562	1	Deletion	Frameshift	OsKitaake12g121100
Chr12	15673758	1	Deletion	Frameshift	OsKitaake12g121300
Chr12	15820352	3	Deletion	Inframe deletion	OsKitaake12g121900
Chr12	16190310	3	Deletion	Inframe deletion	OsKitaake12g123500
Chr12	16190323	3	Deletion	Inframe deletion	OsKitaake12g123500
Chr12	16248736	12	Deletion	Inframe deletion	OsKitaake12g123800
Chr12	16266600	24	Deletion	Inframe deletion	OsKitaake12g124000
Chr12	16267353	3	Deletion	Inframe deletion	OsKitaake12g124000
Chr12	16267370	9	Deletion	Inframe deletion	OsKitaake12g124000
Chr12	16274063	3	Deletion	Inframe deletion	OsKitaake12g124100
Chr12	16403570	3	Deletion	Inframe deletion	OsKitaake12g124500
Chr12	16409930	9	Deletion	Inframe deletion	OsKitaake12g124600
Chr12	17056544	6	Deletion	Inframe deletion	OsKitaake12g125900
Chr12	17056662	1	Deletion	Frameshift	OsKitaake12g125900
Chr12	17056665	2	Deletion	Frameshift	OsKitaake12g125900
Chr12	17219067	3	Deletion	Inframe deletion	OsKitaake12g126800
Chr12	17219119	6	Deletion	Inframe deletion	OsKitaake12g126800
Chr12	17232835	16	Deletion	Frameshift	OsKitaake12g126900
Chr12	17268755	3	Deletion	Inframe deletion	OsKitaake12g127100
Chr12	17268786	2	Deletion	Frameshift	OsKitaake12g127100
Chr12	17268789	1	Deletion	Frameshift	OsKitaake12g127100
Chr12	17268970	3	Deletion	Inframe deletion	OsKitaake12g127100
Chr12	17269004	9	Deletion	Inframe deletion	OsKitaake12g127100
Chr12	17269162	3	Deletion	Inframe deletion	OsKitaake12g127100
Chr12	17293377	15	Deletion	Inframe deletion	OsKitaake12g127200
Chr12	17366471	3	Deletion	Inframe deletion	OsKitaake12g127500
Chr12	18013953	3	Deletion	Inframe deletion	OsKitaake12g132500
Chr12	18014190	6	Deletion	Inframe deletion	OsKitaake12g132500
Chr12	18021945	3	Deletion	Inframe deletion	OsKitaake12g132600
Chr12	18493660	1	Deletion	Frameshift	OsKitaake12g135000
Chr12	18516641	12	Deletion	Inframe deletion	OsKitaake12g135200
Chr12	18538538	3	Deletion	Inframe deletion	OsKitaake12g135400
[truncated: 9,973 more rows]

## Sheet: PAV-genes
Additional file 5 Comparative genomic analysis between KitaakeX and Zhenshan97
Chromosome	Start Position	End Position	Size (bp)	Gene ID
Chr1	68402	71660	3258	OsKitaake01g000800
Chr1	205011	205665	654	OsKitaake01g002800
Chr1	284199	284817	618	OsKitaake01g004000
Chr1	327712	328755	1043	OsKitaake01g004600
Chr1	418346	419826	1480	OsKitaake01g005800
Chr1	425514	426019	505	OsKitaake01g005900
Chr1	688506	701528	13022	OsKitaake01g112708
Chr1	723170	741320	18150	OsKitaake01g006808
Chr1	723170	741320	18150	OsKitaake01g007000
Chr1	723170	741320	18150	OsKitaake01g007200
Chr1	780154	794370	14216	OsKitaake01g008300
Chr1	780154	794370	14216	OsKitaake01g008400
Chr1	822943	823354	411	OsKitaake01g009100
Chr1	878727	881616	2889	OsKitaake01g009700
Chr1	885383	886444	1061	OsKitaake01g009900
Chr1	886874	887857	983	OsKitaake01g009908
Chr1	962958	963740	782	OsKitaake01g010908
Chr1	992254	992695	441	OsKitaake01g011400
Chr1	996923	997909	986	OsKitaake01g011500
Chr1	999377	1033867	34490	OsKitaake01g011600
Chr1	999377	1033867	34490	OsKitaake01g011700
Chr1	999377	1033867	34490	OsKitaake01g011800
Chr1	999377	1033867	34490	OsKitaake01g011900
Chr1	999377	1033867	34490	OsKitaake01g012000
Chr1	1399824	1416991	17167	OsKitaake01g017100
Chr1	1399824	1416991	17167	OsKitaake01g017200
Chr1	1421226	1426237	5011	OsKitaake01g017300
Chr1	1421226	1426237	5011	OsKitaake01g017308
Chr1	1421226	1426237	5011	OsKitaake01g017500
Chr1	1428503	1429956	1453	OsKitaake01g017600
Chr1	1569002	1569497	495	OsKitaake01g019100
Chr1	2019241	2020029	788	OsKitaake01g024900
Chr1	2034602	2035460	858	OsKitaake01g025400
Chr1	2073917	2077760	3843	OsKitaake01g026100
Chr1	2073917	2077760	3843	OsKitaake01g026200
Chr1	2080483	2092231	11748	OsKitaake01g026200
Chr1	2432102	2441461	9359	OsKitaake01g030500
Chr1	2432102	2441461	9359	OsKitaake01g030508
Chr1	2432102	2441461	9359	OsKitaake01g030600
Chr1	2432102	2441461	9359	OsKitaake01g030700
Chr1	2461362	2492017	30655	OsKitaake01g031200
Chr1	2461362	2492017	30655	OsKitaake01g031300
Chr1	2461362	2492017	30655	OsKitaake01g031400
Chr1	2461362	2492017	30655	OsKitaake01g031500
Chr1	2461362	2492017	30655	OsKitaake01g031600
Chr1	2461362	2492017	30655	OsKitaake01g031700
Chr1	2495622	2514357	18735	OsKitaake01g031800
Chr1	2516422	2555228	38806	OsKitaake01g032000
Chr1	2516422	2555228	38806	OsKitaake01g032200
Chr1	2516422	2555228	38806	OsKitaake01g032300
Chr1	2830542	2832350	1808	OsKitaake01g035900
Chr1	2835676	2838833	3157	OsKitaake01g035908
Chr1	2846302	2848013	1711	OsKitaake01g036200
Chr1	2873584	2874628	1044	OsKitaake01g036900
Chr1	2911782	2911929	147	OsKitaake01g037500
Chr1	2912154	2912673	519	OsKitaake01g037500
Chr1	3136849	3168827	31978	OsKitaake01g041000
Chr1	3136849	3168827	31978	OsKitaake01g041100
Chr1	3136849	3168827	31978	OsKitaake01g041200
Chr1	3136849	3168827	31978	OsKitaake01g041300
Chr1	3240889	3257012	16123	OsKitaake01g042400
Chr1	3240889	3257012	16123	OsKitaake01g042500
Chr1	3263973	3274183	10210	OsKitaake01g042600
Chr1	3263973	3274183	10210	OsKitaake01g042800
Chr1	3263973	3274183	10210	OsKitaake01g042900
Chr1	3276659	3300143	23484	OsKitaake01g042908
Chr1	3276659	3300143	23484	OsKitaake01g043000
Chr1	3345979	3346226	247	OsKitaake01g043700
Chr1	3492560	3492780	220	OsKitaake01g046400
Chr1	3919328	3919663	335	OsKitaake01g052700
Chr1	3931699	3932475	776	OsKitaake01g053000
Chr1	3950622	3960734	10112	OsKitaake01g053300
Chr1	3950622	3960734	10112	OsKitaake01g053400
Chr1	3966547	3966865	318	OsKitaake01g053500
Chr1	4003338	4004060	722	OsKitaake01g053800
Chr1	4285854	4291228	5374	OsKitaake01g057200
Chr1	4540227	4575681	35454	OsKitaake01g061100
Chr1	4594571	4597036	2465	OsKitaake01g061700
Chr1	4861776	4862117	341	OsKitaake01g065000
Chr1	4872591	4874753	2162	OsKitaake01g065108
Chr1	5427386	5430934	3548	OsKitaake01g070100
Chr1	5561386	5591482	30096	OsKitaake01g071500
Chr1	5561386	5591482	30096	OsKitaake01g071600
Chr1	5798285	5799217	932	OsKitaake01g073508
Chr1	5841967	5842930	963	OsKitaake01g074000
Chr1	5851442	5862808	11366	OsKitaake01g074200
Chr1	5851442	5862808	11366	OsKitaake01g074300
Chr1	5928743	5929609	866	OsKitaake01g075700
Chr1	6660510	6665060	4550	OsKitaake01g083908
Chr1	6837559	6838816	1257	OsKitaake01g086500
Chr1	7051881	7064694	12813	OsKitaake01g088508
Chr1	7203003	7203608	605	OsKitaake01g090000
Chr1	7506873	7514667	7794	OsKitaake01g094000
Chr1	7532588	7729829	197241	OsKitaake01g094300
Chr1	7532588	7729829	197241	OsKitaake01g094400
Chr1	7532588	7729829	197241	OsKitaake01g094500
Chr1	7532588	7729829	197241	OsKitaake01g094600
Chr1	7532588	7729829	197241	OsKitaake01g094700
Chr1	7532588	7729829	197241	OsKitaake01g094800
Chr1	7532588	7729829	197241	OsKitaake01g094900
Chr1	7532588	7729829	197241	OsKitaake01g095000
Chr1	7532588	7729829	197241	OsKitaake01g095100
Chr1	7532588	7729829	197241	OsKitaake01g095200
Chr1	7532588	7729829	197241	OsKitaake01g095300
Chr1	7532588	7729829	197241	OsKitaake01g095400
Chr1	7532588	7729829	197241	OsKitaake01g095500
Chr1	7532588	7729829	197241	OsKitaake01g095600
Chr1	7532588	7729829	197241	OsKitaake01g095700
Chr1	7532588	7729829	197241	OsKitaake01g095800
Chr1	7532588	7729829	197241	OsKitaake01g095900
Chr1	7532588	7729829	197241	OsKitaake01g096000
Chr1	7532588	7729829	197241	OsKitaake01g096100
Chr1	7532588	7729829	197241	OsKitaake01g096108
Chr1	7532588	7729829	197241	OsKitaake01g096300
Chr1	7532588	7729829	197241	OsKitaake01g096400
Chr1	7532588	7729829	197241	OsKitaake01g096500
Chr1	7532588	7729829	197241	OsKitaake01g096600
Chr1	7532588	7729829	197241	OsKitaake01g096700
Chr1	7532588	7729829	197241	OsKitaake01g096800
Chr1	7532588	7729829	197241	OsKitaake01g096900
Chr1	7532588	7729829	197241	OsKitaake01g097000
Chr1	7887332	7890043	2711	OsKitaake01g098616
Chr1	7887332	7890043	2711	OsKitaake01g098624
Chr1	7887332	7890043	2711	OsKitaake01g098632
Chr1	8285700	8289706	4006	OsKitaake01g103000
Chr1	8595809	8696950	101141	OsKitaake01g107408
Chr1	8595809	8696950	101141	OsKitaake01g107500
Chr1	8595809	8696950	101141	OsKitaake01g107600
Chr1	8595809	8696950	101141	OsKitaake01g107700
Chr1	8595809	8696950	101141	OsKitaake01g107800
Chr1	8595809	8696950	101141	OsKitaake01g107808
Chr1	8595809	8696950	101141	OsKitaake01g107816
Chr1	8595809	8696950	101141	OsKitaake01g108100
Chr1	8595809	8696950	101141	OsKitaake01g108200
Chr1	8595809	8696950	101141	OsKitaake01g108400
Chr1	8595809	8696950	101141	OsKitaake01g108408
Chr1	8595809	8696950	101141	OsKitaake01g108416
Chr1	8595809	8696950	101141	OsKitaake01g108700
Chr1	8595809	8696950	101141	OsKitaake01g108800
Chr1	8595809	8696950	101141	OsKitaake01g108900
Chr1	8595809	8696950	101141	OsKitaake01g109000
Chr1	8921365	8921501	136	OsKitaake01g111400
Chr1	8940970	8941079	109	OsKitaake01g111800
Chr1	8941364	8941722	358	OsKitaake01g111800
Chr1	8942719	8943444	725	OsKitaake01g111800
Chr1	8943882	8944104	222	OsKitaake01g111800
Chr1	8958228	8958642	414	OsKitaake01g112000
Chr1	9647073	9661612	14539	OsKitaake01g123400
Chr1	10660629	10660736	107	OsKitaake01g132150
Chr1	10727284	10792740	65456	OsKitaake01g132800
Chr1	10727284	10792740	65456	OsKitaake01g132900
Chr1	10727284	10792740	65456	OsKitaake01g133000
Chr1	10864439	10872247	7808	OsKitaake01g134100
Chr1	10943109	10955916	12807	OsKitaake01g134601
Chr1	10943109	10955916	12807	OsKitaake01g134700
Chr1	11289368	11298417	9049	OsKitaake01g138400
Chr1	11289368	11298417	9049	OsKitaake01g138500
Chr1	11548443	11862422	313979	OsKitaake01g140400
Chr1	11548443	11862422	313979	OsKitaake01g140500
Chr1	11548443	11862422	313979	OsKitaake01g140600
Chr1	11548443	11862422	313979	OsKitaake01g140700
Chr1	11548443	11862422	313979	OsKitaake01g140800
Chr1	11548443	11862422	313979	OsKitaake01g140900
Chr1	11548443	11862422	313979	OsKitaake01g141100
Chr1	11548443	11862422	313979	OsKitaake01g143150
Chr1	11548443	11862422	313979	OsKitaake01g145200
Chr1	11548443	11862422	313979	OsKitaake01g145300
Chr1	11548443	11862422	313979	OsKitaake01g145400
Chr1	11548443	11862422	313979	OsKitaake01g145500
Chr1	11548443	11862422	313979	OsKitaake01g145600
Chr1	11548443	11862422	313979	OsKitaake01g145700
Chr1	11548443	11862422	313979	OsKitaake01g145800
Chr1	11548443	11862422	313979	OsKitaake01g145900
Chr1	12473632	12473843	211	OsKitaake01g150400
Chr1	12734369	12738664	4295	OsKitaake01g152000
Chr1	12821167	12842709	21542	OsKitaake01g152600
Chr1	12821167	12842709	21542	OsKitaake01g152900
Chr1	12821167	12842709	21542	OsKitaake01g153000
Chr1	12821167	12842709	21542	OsKitaake01g153100
Chr1	12821167	12842709	21542	OsKitaake01g153200
Chr1	13198804	13275181	76377	OsKitaake01g155750
Chr1	13198804	13275181	76377	OsKitaake01g155900
Chr1	13363528	13407006	43478	OsKitaake01g156300
Chr1	13600657	13650883	50226	OsKitaake01g158200
Chr1	13600657	13650883	50226	OsKitaake01g158500
Chr1	13600657	13650883	50226	OsKitaake01g158600
Chr1	13600657	13650883	50226	OsKitaake01g158800
Chr1	13654251	13670182	15931	OsKitaake01g159000
Chr1	13875552	13967520	91968	OsKitaake01g160400
Chr1	13875552	13967520	91968	OsKitaake01g160500
Chr1	13875552	13967520	91968	OsKitaake01g160600
Chr1	14213265	14216118	2853	OsKitaake01g162650
Chr1	14263863	14264067	204	OsKitaake01g163100
Chr1	14395984	14419483	23499	OsKitaake01g164100
Chr1	14489988	14497524	7536	OsKitaake01g164800
Chr1	14530191	14536507	6316	OsKitaake01g165000
Chr1	14530191	14536507	6316	OsKitaake01g165050
Chr1	14552880	14553211	331	OsKitaake01g165200
Chr1	14583671	14584803	1132	OsKitaake01g165600
Chr1	14812948	14846918	33970	OsKitaake01g141300
Chr1	14848089	14848496	407	OsKitaake01g141400
Chr1	14860401	14864516	4115	OsKitaake01g141550
Chr1	15040495	15064819	24324	OsKitaake01g142900
Chr1	15040495	15064819	24324	OsKitaake01g143000
Chr1	15040495	15064819	24324	OsKitaake01g143100
Chr1	15040495	15064819	24324	OsKitaake01g143200
Chr1	15137053	15180333	43280	OsKitaake01g144100
Chr1	15137053	15180333	43280	OsKitaake01g144300
Chr1	15470279	15474914	4635	OsKitaake01g169200
Chr1	15470279	15474914	4635	OsKitaake01g169300
Chr1	15554527	15603048	48521	OsKitaake01g169900
Chr1	15671624	15675365	3741	OsKitaake01g170700
Chr1	15710229	15715248	5019	OsKitaake01g171100
Chr1	15792824	15795856	3032	OsKitaake01g172300
Chr1	16003442	16010478	7036	OsKitaake01g173500
Chr1	16062369	16067586	5217	OsKitaake01g173900
Chr1	16084764	16102234	17470	OsKitaake01g174100
Chr1	16084764	16102234	17470	OsKitaake01g174200
Chr1	16207269	16207593	324	OsKitaake01g174900
Chr1	16208516	16219369	10853	OsKitaake01g174900
Chr1	16255638	16262380	6742	OsKitaake01g175000
Chr1	16287155	16293586	6431	OsKitaake01g175250
Chr1	16318869	16326269	7400	OsKitaake01g175700
Chr1	16328999	16330207	1208	OsKitaake01g175800
Chr1	16330634	16331069	435	OsKitaake01g175800
Chr1	16380756	16382141	1385	OsKitaake01g175900
Chr1	16406097	16409360	3263	OsKitaake01g176200
Chr1	16528873	16528961	88	OsKitaake01g176900
Chr1	16815233	16820010	4777	OsKitaake01g178300
Chr1	16959210	17015952	56742	OsKitaake01g187100
Chr1	16959210	17015952	56742	OsKitaake01g187200
Chr1	16959210	17015952	56742	OsKitaake01g187300
Chr1	17016901	17063110	46209	OsKitaake01g187500
Chr1	17016901	17063110	46209	OsKitaake01g187600
Chr1	17016901	17063110	46209	OsKitaake01g187700
Chr1	17016901	17063110	46209	OsKitaake01g187800
Chr1	17861797	17884449	22652	OsKitaake01g181600
Chr1	17885089	17997317	112228	OsKitaake01g181800
Chr1	17885089	17997317	112228	OsKitaake01g181900
Chr1	17885089	17997317	112228	OsKitaake01g182000
Chr1	17885089	17997317	112228	OsKitaake01g182100
Chr1	17885089	17997317	112228	OsKitaake01g182200
Chr1	17885089	17997317	112228	OsKitaake01g182300
Chr1	17885089	17997317	112228	OsKitaake01g182400
Chr1	18063579	18069107	5528	OsKitaake01g182650
Chr1	18771755	18772517	762	OsKitaake01g188700
Chr1	19014410	19014918	508	OsKitaake01g191000
Chr1	19368293	19373350	5057	OsKitaake01g193550
Chr1	19384491	19389159	4668	OsKitaake01g193600
Chr1	19483440	19483833	393	OsKitaake01g194600
Chr1	20130519	20230838	100319	OsKitaake01g198200
Chr1	20130519	20230838	100319	OsKitaake01g198300
Chr1	20130519	20230838	100319	OsKitaake01g198350
Chr1	20130519	20230838	100319	OsKitaake01g198400
Chr1	20130519	20230838	100319	OsKitaake01g198501
Chr1	20130519	20230838	100319	OsKitaake01g198600
Chr1	20130519	20230838	100319	OsKitaake01g198650
Chr1	20130519	20230838	100319	OsKitaake01g198700
Chr1	20130519	20230838	100319	OsKitaake01g198800
Chr1	20130519	20230838	100319	OsKitaake01g198850
Chr1	20130519	20230838	100319	OsKitaake01g198900
Chr1	20130519	20230838	100319	OsKitaake01g198950
Chr1	20130519	20230838	100319	OsKitaake01g199000
Chr1	20465515	20494909	29394	OsKitaake01g200200
Chr1	20465515	20494909	29394	OsKitaake01g200300
Chr1	20536528	20539925	3397	OsKitaake01g200600
Chr1	20710030	20715380	5350	OsKitaake01g202800
Chr1	20710030	20715380	5350	OsKitaake01g202900
Chr1	20739515	20746034	6519	OsKitaake01g203200
Chr1	20746805	20823779	76974	OsKitaake01g203300
Chr1	20746805	20823779	76974	OsKitaake01g203400
Chr1	20746805	20823779	76974	OsKitaake01g203500
Chr1	20746805	20823779	76974	OsKitaake01g203600
Chr1	20746805	20823779	76974	OsKitaake01g203700
Chr1	20746805	20823779	76974	OsKitaake01g203900
Chr1	20746805	20823779	76974	OsKitaake01g204000
Chr1	20746805	20823779	76974	OsKitaake01g204100
Chr1	20746805	20823779	76974	OsKitaake01g204200
Chr1	20851911	20855547	3636	OsKitaake01g204300
Chr1	21057514	21061386	3872	OsKitaake01g206200
Chr1	21069813	21106926	37113	OsKitaake01g206401
Chr1	21109087	21211525	102438	OsKitaake01g206500
Chr1	21109087	21211525	102438	OsKitaake01g206700
Chr1	21109087	21211525	102438	OsKitaake01g206800
Chr1	21109087	21211525	102438	OsKitaake01g206900
Chr1	21213094	21228036	14942	OsKitaake01g207100
Chr1	21368332	21514135	145803	OsKitaake01g207740
Chr1	21368332	21514135	145803	OsKitaake01g207748
Chr1	21368332	21514135	145803	OsKitaake01g207756
Chr1	21368332	21514135	145803	OsKitaake01g207764
Chr1	21368332	21514135	145803	OsKitaake01g207772
Chr1	21368332	21514135	145803	OsKitaake01g207780
Chr1	21368332	21514135	145803	OsKitaake01g207788
Chr1	21821916	21872770	50854	OsKitaake01g210400
Chr1	21821916	21872770	50854	OsKitaake01g210500
Chr1	21875558	21879298	3740	OsKitaake01g210600
Chr1	21917162	21965384	48222	OsKitaake01g211000
Chr1	21917162	21965384	48222	OsKitaake01g211100
Chr1	21917162	21965384	48222	OsKitaake01g211200
Chr1	21917162	21965384	48222	OsKitaake01g211300
Chr1	21966085	22067227	101142	OsKitaake01g211300
Chr1	21966085	22067227	101142	OsKitaake01g211400
Chr1	21966085	22067227	101142	OsKitaake01g211500
Chr1	22075672	22403969	328297	OsKitaake01g211500
Chr1	22075672	22403969	328297	OsKitaake01g211600
Chr1	22075672	22403969	328297	OsKitaake01g211800
Chr1	22075672	22403969	328297	OsKitaake01g211900
Chr1	22075672	22403969	328297	OsKitaake01g212000
Chr1	22075672	22403969	328297	OsKitaake01g212050
Chr1	22075672	22403969	328297	OsKitaake01g212101
Chr1	22075672	22403969	328297	OsKitaake01g212151
Chr1	22075672	22403969	328297	OsKitaake01g212200
Chr1	22075672	22403969	328297	OsKitaake01g212300
Chr1	22075672	22403969	328297	OsKitaake01g212400
Chr1	22075672	22403969	328297	OsKitaake01g212500
Chr1	22075672	22403969	328297	OsKitaake01g212600
Chr1	22075672	22403969	328297	OsKitaake01g212700
Chr1	22075672	22403969	328297	OsKitaake01g212800
Chr1	22075672	22403969	328297	OsKitaake01g212900
Chr1	22075672	22403969	328297	OsKitaake01g213000
Chr1	22075672	22403969	328297	OsKitaake01g213300
Chr1	22075672	22403969	328297	OsKitaake01g213600
Chr1	22075672	22403969	328297	OsKitaake01g213700
Chr1	22075672	22403969	328297	OsKitaake01g213800
Chr1	22405561	22601618	196057	OsKitaake01g214000
Chr1	22405561	22601618	196057	OsKitaake01g214100
Chr1	22405561	22601618	196057	OsKitaake01g214200
Chr1	22405561	22601618	196057	OsKitaake01g214300
Chr1	22405561	22601618	196057	OsKitaake01g214400
Chr1	22405561	22601618	196057	OsKitaake01g214500
Chr1	22405561	22601618	196057	OsKitaake01g214600
Chr1	22405561	22601618	196057	OsKitaake01g214700
Chr1	22405561	22601618	196057	OsKitaake01g214800
Chr1	22405561	22601618	196057	OsKitaake01g214900
Chr1	22405561	22601618	196057	OsKitaake01g215000
Chr1	22405561	22601618	196057	OsKitaake01g215100
Chr1	22405561	22601618	196057	OsKitaake01g215250
Chr1	22405561	22601618	196057	OsKitaake01g215400
Chr1	22405561	22601618	196057	OsKitaake01g215500
Chr1	22405561	22601618	196057	OsKitaake01g215600
Chr1	22405561	22601618	196057	OsKitaake01g215700
Chr1	22405561	22601618	196057	OsKitaake01g215800
Chr1	22405561	22601618	196057	OsKitaake01g216001
Chr1	22601795	22798308	196513	OsKitaake01g216200
Chr1	22601795	22798308	196513	OsKitaake01g216250
Chr1	22601795	22798308	196513	OsKitaake01g216300
Chr1	22601795	22798308	196513	OsKitaake01g216400
Chr1	22601795	22798308	196513	OsKitaake01g216500
Chr1	22601795	22798308	196513	OsKitaake01g216600
Chr1	22601795	22798308	196513	OsKitaake01g216700
Chr1	22601795	22798308	196513	OsKitaake01g216800
Chr1	22601795	22798308	196513	OsKitaake01g216900
Chr1	22601795	22798308	196513	OsKitaake01g217000
Chr1	22601795	22798308	196513	OsKitaake01g217100
Chr1	22601795	22798308	196513	OsKitaake01g217200
Chr1	22601795	22798308	196513	OsKitaake01g217300
Chr1	22601795	22798308	196513	OsKitaake01g217600
Chr1	22922794	22923709	915	OsKitaake01g218200
Chr1	22990448	22991403	955	OsKitaake01g218900
Chr1	23204721	23205260	539	OsKitaake01g221900
Chr1	23557697	23566762	9065	OsKitaake01g226500
Chr1	24062426	24065416	2990	OsKitaake01g231100
Chr1	24201472	24205358	3886	OsKitaake01g232900
Chr1	24201472	24205358	3886	OsKitaake01g233000
Chr1	24329725	24351896	22171	OsKitaake01g234300
Chr1	24369956	24372955	2999	OsKitaake01g234700
Chr1	24457213	24475772	18559	OsKitaake01g235132
Chr1	24457213	24475772	18559	OsKitaake01g235300
Chr1	24521129	24524293	3164	OsKitaake01g236250
Chr1	25999492	26000646	1154	OsKitaake01g252800
Chr1	26596591	26675353	78762	OsKitaake01g258550
Chr1	26596591	26675353	78762	OsKitaake01g258600
Chr1	26596591	26675353	78762	OsKitaake01g258700
Chr1	26596591	26675353	78762	OsKitaake01g258800
Chr1	26596591	26675353	78762	OsKitaake01g258900
Chr1	26596591	26675353	78762	OsKitaake01g259000
Chr1	26596591	26675353	78762	OsKitaake01g259100
Chr1	26596591	26675353	78762	OsKitaake01g259200
Chr1	26596591	26675353	78762	OsKitaake01g259300
Chr1	26596591	26675353	78762	OsKitaake01g259400
Chr1	26810689	26815192	4503	OsKitaake01g260600
Chr1	27289910	27294482	4572	OsKitaake01g265500
Chr1	27486881	27492077	5196	OsKitaake01g267300
Chr1	28017630	28026342	8712	OsKitaake01g272600
Chr1	28320085	28327224	7139	OsKitaake01g274500
Chr1	28465933	28466354	421	OsKitaake01g276000
Chr1	29042428	29043421	993	OsKitaake01g281901
Chr1	29301529	29304435	2906	OsKitaake01g285700
Chr1	29318015	29319344	1329	OsKitaake01g285900
Chr1	29318015	29319344	1329	OsKitaake01g285950
Chr1	29326119	29326991	872	OsKitaake01g286000
Chr1	29326119	29326991	872	OsKitaake01g286100
Chr1	29328167	29332132	3965	OsKitaake01g286200
Chr1	29333349	29335451	2102	OsKitaake01g286333
Chr1	29333349	29335451	2102	OsKitaake01g286100
Chr1	29339002	29339147	145	OsKitaake01g286466
Chr1	29447555	29451828	4273	OsKitaake01g288100
Chr1	29500399	29500648	249	OsKitaake01g289000
Chr1	29792689	29845556	52867	OsKitaake01g292900
Chr1	29792689	29845556	52867	OsKitaake01g292966
Chr1	29792689	29845556	52867	OsKitaake01g293032
Chr1	29792689	29845556	52867	OsKitaake01g293100
Chr1	30328203	30330830	2627	OsKitaake01g299000
Chr1	30372739	30373068	329	OsKitaake01g299700
Chr1	30477996	30515824	37828	OsKitaake01g301600
Chr1	30477996	30515824	37828	OsKitaake01g301700
Chr1	31371465	31383418	11953	OsKitaake01g314601
Chr1	32635980	32640212	4232	OsKitaake01g331100
Chr1	33292605	33296288	3683	OsKitaake01g340100
Chr1	33296586	33296865	279	OsKitaake01g340100
Chr1	33298037	33299204	1167	OsKitaake01g340100
Chr1	33349183	33349486	303	OsKitaake01g340700
Chr1	33349727	33352179	2452	OsKitaake01g340800
Chr1	33397952	33405507	7555	OsKitaake01g341300
Chr1	33397952	33405507	7555	OsKitaake01g341400
Chr1	33397952	33405507	7555	OsKitaake01g341500
Chr1	33549044	33549457	413	OsKitaake01g343500
Chr1	33552265	33565938	13673	OsKitaake01g343601
Chr1	33552265	33565938	13673	OsKitaake01g343700
Chr1	33552265	33565938	13673	OsKitaake01g343800
Chr1	34914836	35089864	175028	OsKitaake01g367801
Chr1	34914836	35089864	175028	OsKitaake01g367900
Chr1	34914836	35089864	175028	OsKitaake01g368000
Chr1	34914836	35089864	175028	OsKitaake01g368100
Chr1	34914836	35089864	175028	OsKitaake01g368200
Chr1	34914836	35089864	175028	OsKitaake01g368300
Chr1	34914836	35089864	175028	OsKitaake01g368400
Chr1	34914836	35089864	175028	OsKitaake01g368500
Chr1	34914836	35089864	175028	OsKitaake01g368600
Chr1	34914836	35089864	175028	OsKitaake01g368700
Chr1	34914836	35089864	175028	OsKitaake01g368800
Chr1	34914836	35089864	175028	OsKitaake01g368900
Chr1	34914836	35089864	175028	OsKitaake01g369000
Chr1	34914836	35089864	175028	OsKitaake01g369100
Chr1	34914836	35089864	175028	OsKitaake01g369200
Chr1	34914836	35089864	175028	OsKitaake01g369300
Chr1	34914836	35089864	175028	OsKitaake01g369400
Chr1	34914836	35089864	175028	OsKitaake01g369500
Chr1	34914836	35089864	175028	OsKitaake01g369600
Chr1	34914836	35089864	175028	OsKitaake01g369700
Chr1	34914836	35089864	175028	OsKitaake01g369800
Chr1	34914836	35089864	175028	OsKitaake01g369850
Chr1	34914836	35089864	175028	OsKitaake01g369900
Chr1	37418356	37426494	8138	OsKitaake01g399601
Chr1	37730199	37734125	3926	OsKitaake01g402701
Chr1	38392455	38393079	624	OsKitaake01g409900
Chr1	38728338	38731004	2666	OsKitaake01g414300
Chr1	38895593	38898328	2735	OsKitaake01g417300
Chr1	38903877	38903991	114	OsKitaake01g417500
Chr1	39208815	39210852	2037	OsKitaake01g421450
Chr1	39305772	39309333	3561	OsKitaake01g422700
Chr1	39305772	39309333	3561	OsKitaake01g422800
Chr1	39305772	39309333	3561	OsKitaake01g422900
Chr1	39305772	39309333	3561	OsKitaake01g423000
Chr1	39305772	39309333	3561	OsKitaake01g423101
Chr1	39630511	39631252	741	OsKitaake01g427900
Chr1	39862063	39877936	15873	OsKitaake01g431350
Chr1	39878590	39878747	157	OsKitaake01g431400
Chr1	40360880	40361813	933	OsKitaake01g438300
Chr1	41260901	41424522	163621	OsKitaake01g450800
Chr1	41260901	41424522	163621	OsKitaake01g450900
Chr1	41260901	41424522	163621	OsKitaake01g451000
Chr1	41260901	41424522	163621	OsKitaake01g451100
Chr1	41260901	41424522	163621	OsKitaake01g451200
Chr1	41260901	41424522	163621	OsKitaake01g451250
Chr1	41260901	41424522	163621	OsKitaake01g451300
Chr1	41260901	41424522	163621	OsKitaake01g451366
Chr1	41260901	41424522	163621	OsKitaake01g451432
Chr1	41260901	41424522	163621	OsKitaake01g451500
Chr1	41260901	41424522	163621	OsKitaake01g451400
Chr1	41260901	41424522	163621	OsKitaake01g451600
Chr1	41260901	41424522	163621	OsKitaake01g451700
Chr1	41260901	41424522	163621	OsKitaake01g451801
Chr1	41260901	41424522	163621	OsKitaake01g451900
Chr1	41260901	41424522	163621	OsKitaake01g452000
Chr1	41260901	41424522	163621	OsKitaake01g452050
Chr1	41260901	41424522	163621	OsKitaake01g452100
Chr1	41260901	41424522	163621	OsKitaake01g452150
Chr1	41260901	41424522	163621	OsKitaake01g452200
Chr1	41260901	41424522	163621	OsKitaake01g452300
Chr1	41424859	41625182	200323	OsKitaake01g452400
Chr1	41424859	41625182	200323	OsKitaake01g452500
Chr1	41424859	41625182	200323	OsKitaake01g452600
Chr1	41424859	41625182	200323	OsKitaake01g452700
Chr1	41424859	41625182	200323	OsKitaake01g452800
Chr1	41424859	41625182	200323	OsKitaake01g452900
Chr1	41424859	41625182	200323	OsKitaake01g453000
Chr1	41424859	41625182	200323	OsKitaake01g453100
Chr1	41424859	41625182	200323	OsKitaake01g453200
Chr1	41424859	41625182	200323	OsKitaake01g453300
Chr1	41424859	41625182	200323	OsKitaake01g453400
Chr1	41424859	41625182	200323	OsKitaake01g453500
Chr1	41424859	41625182	200323	OsKitaake01g453600
Chr1	41424859	41625182	200323	OsKitaake01g453700
Chr1	41424859	41625182	200323	OsKitaake01g453800
Chr1	41424859	41625182	200323	OsKitaake01g453900
Chr1	41424859	41625182	200323	OsKitaake01g454000
Chr1	41424859	41625182	200323	OsKitaake01g454100
Chr1	41424859	41625182	200323	OsKitaake01g454200
Chr1	41424859	41625182	200323	OsKitaake01g454300
Chr1	41424859	41625182	200323	OsKitaake01g454400
Chr1	41424859	41625182	200323	OsKitaake01g454500
Chr1	41981081	41984857	3776	OsKitaake01g460300
Chr1	42170602	42175478	4876	OsKitaake01g463500
Chr1	42170602	42175478	4876	OsKitaake01g463600
Chr1	42648577	42654361	5784	OsKitaake01g470100
Chr1	42689020	42694536	5516	OsKitaake01g470900
Chr1	42715507	42775177	59670	OsKitaake01g471100
Chr1	42715507	42775177	59670	OsKitaake01g471200
Chr1	42715507	42775177	59670	OsKitaake01g471250
Chr1	42715507	42775177	59670	OsKitaake01g471300
Chr1	42806041	42806393	352	OsKitaake01g471750
Chr10	241359	275208	33849	OsKitaake10g001800
Chr10	488908	494703	5795	OsKitaake10g003700
Chr10	541278	576284	35006	OsKitaake10g004100
Chr10	589168	589743	575	OsKitaake10g004200
Chr10	818625	820641	2016	OsKitaake10g005500
Chr10	823266	831446	8180	OsKitaake10g005600
Chr10	823266	831446	8180	OsKitaake10g005700
Chr10	844980	845140	160	OsKitaake10g005800
Chr10	1056709	1062538	5829	OsKitaake10g007800
Chr10	1056709	1062538	5829	OsKitaake10g007900
Chr10	1056709	1062538	5829	OsKitaake10g007700
Chr10	1063274	1088452	25178	OsKitaake10g008000
Chr10	1272852	1359080	86228	OsKitaake10g009800
Chr10	1568654	1591930	23276	OsKitaake10g010801
Chr10	1609022	1609895	873	OsKitaake10g011300
Chr10	1613843	1624803	10960	OsKitaake10g011400
Chr10	1702594	1712011	9417	OsKitaake10g012000
Chr10	1713391	1718024	4633	OsKitaake10g012000
Chr10	1775189	1776522	1333	OsKitaake10g013000
Chr10	1835185	1838709	3524	OsKitaake10g013600
Chr10	1873861	1879620	5759	OsKitaake10g014500
Chr10	1873861	1879620	5759	OsKitaake10g014600
Chr10	1943940	1966029	22089	OsKitaake10g015400
Chr10	1968899	1970597	1698	OsKitaake10g015500
Chr10	1971438	1977469	6031	OsKitaake10g015600
Chr10	1979201	2003599	24398	OsKitaake10g015700
Chr10	2003742	2123351	119609	OsKitaake10g015900
Chr10	2003742	2123351	119609	OsKitaake10g016000
Chr10	2003742	2123351	119609	OsKitaake10g016100
Chr10	2003742	2123351	119609	OsKitaake10g016201
Chr10	2003742	2123351	119609	OsKitaake10g016300
Chr10	2125988	2126441	453	OsKitaake10g016400
Chr10	2186415	2189811	3396	OsKitaake10g017100
Chr10	2274005	2303510	29505	OsKitaake10g018500
Chr10	2274005	2303510	29505	OsKitaake10g018600
Chr10	2274005	2303510	29505	OsKitaake10g018700
Chr10	2304605	2305615	1010	OsKitaake10g018900
Chr10	2357956	2361520	3564	OsKitaake10g019250
Chr10	2382723	2383292	569	OsKitaake10g019500
Chr10	2716963	2719847	2884	OsKitaake10g022300
Chr10	3022782	3032616	9834	OsKitaake10g024650
Chr10	3022782	3032616	9834	OsKitaake10g024700
Chr10	3050005	3053587	3582	OsKitaake10g024800
Chr10	3721468	3727866	6398	OsKitaake10g027800
Chr10	3791090	3793843	2753	OsKitaake10g028900
Chr10	3846898	3875053	28155	OsKitaake10g029200
Chr10	3846898	3875053	28155	OsKitaake10g029300
Chr10	3876848	3920409	43561	OsKitaake10g029500
Chr10	3876848	3920409	43561	OsKitaake10g029600
Chr10	4102932	4106599	3667	OsKitaake10g031300
Chr10	4123538	4289506	165968	OsKitaake10g031400
Chr10	4123538	4289506	165968	OsKitaake10g031450
Chr10	4123538	4289506	165968	OsKitaake10g031500
Chr10	4123538	4289506	165968	OsKitaake10g031600
Chr10	4123538	4289506	165968	OsKitaake10g031700
Chr10	4123538	4289506	165968	OsKitaake10g031800
Chr10	4123538	4289506	165968	OsKitaake10g032000
Chr10	4123538	4289506	165968	OsKitaake10g032100
Chr10	4123538	4289506	165968	OsKitaake10g032200
Chr10	4123538	4289506	165968	OsKitaake10g032250
Chr10	4342399	4387680	45281	OsKitaake10g032600
Chr10	4439948	4441139	1191	OsKitaake10g032975
Chr10	4692461	4705149	12688	OsKitaake10g034400
Chr10	4795642	4818257	22615	OsKitaake10g034666
Chr10	4833628	4833798	170	OsKitaake10g034732
Chr10	5283991	5292350	8359	OsKitaake10g037801
Chr10	5283991	5292350	8359	OsKitaake10g037900
Chr10	5317302	5366434	49132	OsKitaake10g038100
Chr10	5367517	5387558	20041	OsKitaake10g038200
Chr10	5399936	5476982	77046	OsKitaake10g038250
Chr10	5525126	5526196	1070	OsKitaake10g038300
Chr10	5525126	5526196	1070	OsKitaake10g038400
Chr10	6049775	6055091	5316	OsKitaake10g041900
Chr10	7035026	7092240	57214	OsKitaake10g046800
Chr10	7035026	7092240	57214	OsKitaake10g046900
Chr10	7035026	7092240	57214	OsKitaake10g046800
Chr10	7487514	7535708	48194	OsKitaake10g048700
Chr10	7487514	7535708	48194	OsKitaake10g048800
Chr10	7623758	7809091	185333	OsKitaake10g049100
Chr10	7623758	7809091	185333	OsKitaake10g049250
Chr10	7623758	7809091	185333	OsKitaake10g049400
Chr10	7623758	7809091	185333	OsKitaake10g049600
Chr10	7826127	7855847	29720	OsKitaake10g049700
Chr10	7826127	7855847	29720	OsKitaake10g049801
Chr10	8081586	8084067	2481	OsKitaake10g051100
Chr10	8632546	8632780	234	OsKitaake10g053100
Chr10	8766101	8819202	53101	OsKitaake10g053300
Chr10	9352758	9370954	18196	OsKitaake10g054475
Chr10	9979426	10072390	92964	OsKitaake10g058500
Chr10	9979426	10072390	92964	OsKitaake10g058600
Chr10	10102460	10127315	24855	OsKitaake10g058800
Chr10	10349695	10353273	3578	OsKitaake10g060150
Chr10	10364229	10364504	275	OsKitaake10g060200
Chr10	10441400	10475289	33889	OsKitaake10g061050
Chr10	10602577	10612812	10235	OsKitaake10g062900
Chr10	10828729	10845829	17100	OsKitaake10g064200
Chr10	10885006	10892611	7605	OsKitaake10g064250
Chr10	10918983	11006370	87387	OsKitaake10g064500
Chr10	10918983	11006370	87387	OsKitaake10g064550
Chr10	10918983	11006370	87387	OsKitaake10g064600
Chr10	10918983	11006370	87387	OsKitaake10g064700
Chr10	10918983	11006370	87387	OsKitaake10g064800
Chr10	10918983	11006370	87387	OsKitaake10g064900
Chr10	10918983	11006370	87387	OsKitaake10g065000
Chr10	11357465	11359169	1704	OsKitaake10g067185
Chr10	11442084	11480966	38882	OsKitaake10g067600
Chr10	11442084	11480966	38882	OsKitaake10g071350
Chr10	11442084	11480966	38882	OsKitaake10g067400
Chr10	11442084	11480966	38882	OsKitaake10g071150
Chr10	11442084	11480966	38882	OsKitaake10g074901
Chr10	11442084	11480966	38882	OsKitaake10g078651
Chr10	11442084	11480966	38882	OsKitaake10g082401
Chr10	11442084	11480966	38882	OsKitaake10g086151
Chr10	11442084	11480966	38882	OsKitaake10g089901
Chr10	11442084	11480966	38882	OsKitaake10g093651
Chr10	11442084	11480966	38882	OsKitaake10g097401
Chr10	11442084	11480966	38882	OsKitaake10g101151
Chr10	11442084	11480966	38882	OsKitaake10g104901
Chr10	11442084	11480966	38882	OsKitaake10g108651
Chr10	11442084	11480966	38882	OsKitaake10g112401
Chr10	11442084	11480966	38882	OsKitaake10g116151
Chr10	11442084	11480966	38882	OsKitaake10g119901
Chr10	11442084	11480966	38882	OsKitaake10g123651
Chr10	11442084	11480966	38882	OsKitaake10g127401
Chr10	11442084	11480966	38882	OsKitaake10g131151
Chr10	11442084	11480966	38882	OsKitaake10g134901
Chr10	11442084	11480966	38882	OsKitaake10g138651
Chr10	11442084	11480966	38882	OsKitaake10g142401
Chr10	11442084	11480966	38882	OsKitaake10g146151
Chr10	11442084	11480966	38882	OsKitaake10g165800
Chr10	11442084	11480966	38882	OsKitaake10g165801
Chr10	11442084	11480966	38882	OsKitaake10g165802
Chr10	11442084	11480966	38882	OsKitaake10g165803
Chr10	11442084	11480966	38882	OsKitaake10g165804
Chr10	11442084	11480966	38882	OsKitaake10g165805
Chr10	11442084	11480966	38882	OsKitaake10g165806
Chr10	11912082	11917467	5385	OsKitaake10g070900
Chr10	12100676	12163938	63262	OsKitaake10g072300
Chr10	12100676	12163938	63262	OsKitaake10g072500
Chr10	12100676	12163938	63262	OsKitaake10g072501
Chr10	12203513	12234391	30878	OsKitaake10g072900
Chr10	12203513	12234391	30878	OsKitaake10g073000
Chr10	12258998	12259305	307	OsKitaake10g073300
Chr10	12341539	12347501	5962	OsKitaake10g074100
Chr10	12396467	12404832	8365	OsKitaake10g074500
Chr10	12429830	12431122	1292	OsKitaake10g074800
Chr10	13068180	13079377	11197	OsKitaake10g079600
Chr10	13068180	13079377	11197	OsKitaake10g079601
Chr10	13444933	13480655	35722	OsKitaake10g080900
Chr10	13444933	13480655	35722	OsKitaake10g081000
Chr10	13512950	13513843	893	OsKitaake10g081300
Chr10	13668563	13670482	1919	OsKitaake10g082900
Chr10	13675793	13678113	2320	OsKitaake10g083200
Chr10	13716823	13718701	1878	OsKitaake10g083400
Chr10	14662119	14664954	2835	OsKitaake10g091903
Chr10	14682693	14682860	167	OsKitaake10g092100
Chr10	14789392	14812173	22781	OsKitaake10g092501
Chr10	14878737	14895182	16445	OsKitaake10g092800
Chr10	14912390	14914582	2192	OsKitaake10g093200
Chr10	15012439	15033395	20956	OsKitaake10g094001
Chr10	15261998	15265697	3699	OsKitaake10g097300
Chr10	15412339	15418256	5917	OsKitaake10g099000
Chr10	15412339	15418256	5917	OsKitaake10g099100
Chr10	15418814	15419541	727	OsKitaake10g099100
Chr10	15418814	15419541	727	OsKitaake10g099101
Chr10	15501147	15505527	4380	OsKitaake10g100100
Chr10	15520095	15522729	2634	OsKitaake10g100301
Chr10	15653079	15654831	1752	OsKitaake10g102000
Chr10	15656161	15660594	4433	OsKitaake10g102100
Chr10	15835842	15853737	17895	OsKitaake10g103101
Chr10	15835842	15853737	17895	OsKitaake10g103300
Chr10	15862885	15863221	336	OsKitaake10g103500
Chr10	15913107	15917979	4872	OsKitaake10g104101
Chr10	15923080	15928607	5527	OsKitaake10g104400
Chr10	15945315	15993682	48367	OsKitaake10g104900
Chr10	15945315	15993682	48367	OsKitaake10g105000
Chr10	15945315	15993682	48367	OsKitaake10g105200
Chr10	15945315	15993682	48367	OsKitaake10g105300
Chr10	15945315	15993682	48367	OsKitaake10g105400
Chr10	15945315	15993682	48367	OsKitaake10g105500
Chr10	15945315	15993682	48367	OsKitaake10g105600
Chr10	15945315	15993682	48367	OsKitaake10g105700
Chr10	16462344	16467079	4735	OsKitaake10g111700
Chr10	16484418	16493164	8746	OsKitaake10g112000
Chr10	16585446	16588381	2935	OsKitaake10g113200
Chr10	16730577	16733507	2930	OsKitaake10g114100
Chr10	16923328	16932002	8674	OsKitaake10g116000
Chr10	16923328	16932002	8674	OsKitaake10g116100
Chr10	16923328	16932002	8674	OsKitaake10g116200
Chr10	17057889	17062562	4673	OsKitaake10g116800
Chr10	17075516	17076719	1203	OsKitaake10g116802
Chr10	17099606	17133974	34368	OsKitaake10g116803
Chr10	17140291	17189476	49185	OsKitaake10g117200
Chr10	17140291	17189476	49185	OsKitaake10g117300
Chr10	17140291	17189476	49185	OsKitaake10g117400
Chr10	17198086	17217889	19803	OsKitaake10g117700
Chr10	17427444	17427889	445	OsKitaake10g118700
Chr10	17584459	17585418	959	OsKitaake10g120200
Chr10	18036393	18045491	9098	OsKitaake10g127100
Chr10	18036393	18045491	9098	OsKitaake10g127200
Chr10	18079232	18090082	10850	OsKitaake10g127402
Chr10	18079232	18090082	10850	OsKitaake10g127403
Chr10	19336522	19346935	10413	OsKitaake10g140200
Chr10	19336522	19346935	10413	OsKitaake10g140300
Chr10	19336522	19346935	10413	OsKitaake10g140301
Chr10	19366987	19387183	20196	OsKitaake10g141100
Chr10	19387836	19394235	6399	OsKitaake10g141200
Chr10	19603954	19604387	433	OsKitaake10g144400
Chr10	19874693	19874843	150	OsKitaake10g148700
Chr10	19874693	19874843	150	OsKitaake10g148800
Chr10	20103512	20107821	4309	OsKitaake10g152100
Chr10	20152294	20153685	1391	OsKitaake10g152800
Chr10	20152294	20153685	1391	OsKitaake10g152900
Chr10	20168430	20168818	388	OsKitaake10g153000
Chr10	20174273	20175031	758	OsKitaake10g153001
Chr10	20176066	20185740	9674	OsKitaake10g153300
Chr10	20624395	20624626	231	OsKitaake10g158200
Chr10	20629460	20631656	2196	OsKitaake10g158300
Chr10	20638085	20639941	1856	OsKitaake10g158600
Chr10	21029448	21067560	38112	OsKitaake10g163000
Chr10	21029448	21067560	38112	OsKitaake10g163100
Chr10	21029448	21067560	38112	OsKitaake10g163200
Chr10	21239456	21249330	9874	OsKitaake10g165500
Chr10	21292622	21294203	1581	OsKitaake10g168000
Chr10	21518220	21520984	2764	OsKitaake10g171100
Chr10	21755662	21757099	1437	OsKitaake10g174500
Chr10	21860900	21872589	11689	OsKitaake10g176400
Chr10	21860900	21872589	11689	OsKitaake10g176501
Chr10	22019317	22021910	2593	OsKitaake10g178200
Chr10	22293030	22304331	11301	OsKitaake10g182633
Chr10	22326838	22330844	4006	OsKitaake10g183000
Chr10	22678872	22678969	97	OsKitaake10g187700
Chr10	23172094	23172531	437	OsKitaake10g195400
Chr10	23244620	23249034	4414	OsKitaake10g196100
Chr10	23244620	23249034	4414	OsKitaake10g196200
Chr10	23244620	23249034	4414	OsKitaake10g196250
Chr10	23244620	23249034	4414	OsKitaake10g196300
Chr10	23387873	23391297	3424	OsKitaake10g199600
Chr10	23520557	23627507	106950	OsKitaake10g201200
Chr10	23520557	23627507	106950	OsKitaake10g201300
Chr10	23520557	23627507	106950	OsKitaake10g201400
Chr10	23520557	23627507	106950	OsKitaake10g201500
Chr10	23520557	23627507	106950	OsKitaake10g201600
Chr10	23520557	23627507	106950	OsKitaake10g201700
Chr10	23520557	23627507	106950	OsKitaake10g201800
Chr10	23520557	23627507	106950	OsKitaake10g201900
Chr10	23520557	23627507	106950	OsKitaake10g202000
Chr10	23520557	23627507	106950	OsKitaake10g202200
Chr10	23520557	23627507	106950	OsKitaake10g202300
Chr10	23520557	23627507	106950	OsKitaake10g202400
Chr10	23520557	23627507	106950	OsKitaake10g202500
Chr10	23520557	23627507	106950	OsKitaake10g202600
Chr10	23520557	23627507	106950	OsKitaake10g202700
Chr10	23520557	23627507	106950	OsKitaake10g202800
Chr11	36717	36831	114	OsKitaake11g000080
Chr11	796784	798767	1983	OsKitaake11g010300
Chr11	1696322	1701314	4992	OsKitaake11g022600
Chr11	2019985	2045680	25695	OsKitaake11g029300
Chr11	2019985	2045680	25695	OsKitaake11g029400
Chr11	2019985	2045680	25695	OsKitaake11g029500
Chr11	2019985	2045680	25695	OsKitaake11g029550
Chr11	2019985	2045680	25695	OsKitaake11g029600
Chr11	2019985	2045680	25695	OsKitaake11g029700
Chr11	2019985	2045680	25695	OsKitaake11g029800
Chr11	2330007	2333880	3873	OsKitaake11g033700
Chr11	2330007	2333880	3873	OsKitaake11g033750
Chr11	2580843	2592809	11966	OsKitaake11g037300
Chr11	3311111	3311392	281	OsKitaake11g046000
Chr11	3403789	3452143	48354	OsKitaake11g047200
Chr11	3403789	3452143	48354	OsKitaake11g047300
Chr11	3403789	3452143	48354	OsKitaake11g047400
Chr11	3403789	3452143	48354	OsKitaake11g047500
Chr11	3622348	3623122	774	OsKitaake11g050000
Chr11	3639221	3640287	1066	OsKitaake11g050400
Chr11	3680031	3680337	306	OsKitaake11g051100
Chr11	3812415	3818625	6210	OsKitaake11g053200
Chr11	4121786	4122139	353	OsKitaake11g056100
Chr11	4138091	4143155	5064	OsKitaake11g056300
Chr11	4143598	4146169	2571	OsKitaake11g056400
Chr11	4177801	4179741	1940	OsKitaake11g056700
Chr11	4230246	4231376	1130	OsKitaake11g056900
Chr11	4295817	4353481	57664	OsKitaake11g057600
Chr11	4295817	4353481	57664	OsKitaake11g057700
Chr11	4295817	4353481	57664	OsKitaake11g057800
Chr11	4295817	4353481	57664	OsKitaake11g057900
Chr11	4295817	4353481	57664	OsKitaake11g057950
Chr11	4295817	4353481	57664	OsKitaake11g058000
Chr11	4295817	4353481	57664	OsKitaake11g058050
Chr11	4295817	4353481	57664	OsKitaake11g058100
Chr11	4295817	4353481	57664	OsKitaake11g058200
Chr11	4295817	4353481	57664	OsKitaake11g058300
Chr11	4295817	4353481	57664	OsKitaake11g058400
Chr11	4354104	4489534	135430	OsKitaake11g058500
Chr11	4354104	4489534	135430	OsKitaake11g058600
Chr11	4354104	4489534	135430	OsKitaake11g058700
Chr11	4354104	4489534	135430	OsKitaake11g058800
Chr11	4354104	4489534	135430	OsKitaake11g058900
Chr11	4354104	4489534	135430	OsKitaake11g059000
Chr11	4354104	4489534	135430	OsKitaake11g059100
Chr11	4354104	4489534	135430	OsKitaake11g059200
Chr11	4354104	4489534	135430	OsKitaake11g059300
Chr11	4354104	4489534	135430	OsKitaake11g059400
Chr11	4354104	4489534	135430	OsKitaake11g059500
Chr11	4354104	4489534	135430	OsKitaake11g059600
Chr11	4354104	4489534	135430	OsKitaake11g059700
Chr11	4354104	4489534	135430	OsKitaake11g059800
Chr11	4354104	4489534	135430	OsKitaake11g059900
Chr11	4354104	4489534	135430	OsKitaake11g060001
Chr11	4510148	4526867	16719	OsKitaake11g060100
Chr11	4510148	4526867	16719	OsKitaake11g060200
Chr11	4596739	4598378	1639	OsKitaake11g060501
Chr11	4773652	4789570	15918	OsKitaake11g061500
Chr11	4773652	4789570	15918	OsKitaake11g061600
Chr11	5029981	5045883	15902	OsKitaake11g063900
Chr11	5113197	5114131	934	OsKitaake11g064366
Chr11	5173871	5174291	420	OsKitaake11g065150
Chr11	5186384	5188473	2089	OsKitaake11g065200
Chr11	5216083	5216583	500	OsKitaake11g065600
Chr11	5245758	5246117	359	OsKitaake11g066000
Chr11	5257109	5269750	12641	OsKitaake11g066300
Chr11	5257109	5269750	12641	OsKitaake11g066400
Chr11	5291774	5430984	139210	OsKitaake11g066466
Chr11	5291774	5430984	139210	OsKitaake11g066499
Chr11	5291774	5430984	139210	OsKitaake11g066532
Chr11	5291774	5430984	139210	OsKitaake11g066565
Chr11	5291774	5430984	139210	OsKitaake11g066600
Chr11	5540778	5548997	8219	OsKitaake11g067800
Chr11	5596817	5608421	11604	OsKitaake11g068700
Chr11	5727984	5728375	391	OsKitaake11g070300
Chr11	5871683	5904682	32999	OsKitaake11g071700
Chr11	5871683	5904682	32999	OsKitaake11g071800
Chr11	5924895	5932638	7743	OsKitaake11g072400
Chr11	5924895	5932638	7743	OsKitaake11g072200
Chr11	5946676	5950280	3604	OsKitaake11g072500
Chr11	5950772	5950970	198	OsKitaake11g072500
Chr11	6118248	6137096	18848	OsKitaake11g073800
Chr11	6197727	6204333	6606	OsKitaake11g074400
Chr11	6539374	6589697	50323	OsKitaake11g077800
Chr11	6539374	6589697	50323	OsKitaake11g077900
Chr11	6539374	6589697	50323	OsKitaake11g078000
Chr11	6539374	6589697	50323	OsKitaake11g078200
Chr11	6966764	7055432	88668	OsKitaake11g080130
Chr11	6966764	7055432	88668	OsKitaake11g080185
Chr11	6966764	7055432	88668	OsKitaake11g080240
Chr11	6966764	7055432	88668	OsKitaake11g080300
Chr11	6966764	7055432	88668	OsKitaake11g080400
Chr11	6966764	7055432	88668	OsKitaake11g080500
Chr11	7055687	7198810	143123	OsKitaake11g080600
Chr11	7055687	7198810	143123	OsKitaake11g080700
Chr11	7055687	7198810	143123	OsKitaake11g080800
Chr11	7055687	7198810	143123	OsKitaake11g080900
Chr11	7055687	7198810	143123	OsKitaake11g080950
Chr11	7055687	7198810	143123	OsKitaake11g081000
Chr11	7055687	7198810	143123	OsKitaake11g081100
Chr11	7055687	7198810	143123	OsKitaake11g081200
Chr11	7055687	7198810	143123	OsKitaake11g081300
Chr11	7055687	7198810	143123	OsKitaake11g081500
Chr11	7055687	7198810	143123	OsKitaake11g081400
Chr11	7055687	7198810	143123	OsKitaake11g081500
Chr11	7055687	7198810	143123	OsKitaake11g081600
Chr11	7055687	7198810	143123	OsKitaake11g081700
Chr11	7055687	7198810	143123	OsKitaake11g081900
Chr11	7204920	7220238	15318	OsKitaake11g082001
Chr11	7223079	7223795	716	OsKitaake11g082200
Chr11	7249569	7257001	7432	OsKitaake11g082632
Chr11	7278032	7282255	4223	OsKitaake11g082800
Chr11	7282534	7283601	1067	OsKitaake11g082900
Chr11	7444207	7547321	103114	OsKitaake11g084300
Chr11	7444207	7547321	103114	OsKitaake11g084366
Chr11	7444207	7547321	103114	OsKitaake11g084432
Chr11	7444207	7547321	103114	OsKitaake11g084500
Chr11	7444207	7547321	103114	OsKitaake11g084600
Chr11	7444207	7547321	103114	OsKitaake11g084700
Chr11	7444207	7547321	103114	OsKitaake11g084800
Chr11	7444207	7547321	103114	OsKitaake11g084900
Chr11	7579023	7579413	390	OsKitaake11g085200
Chr11	7593053	7661004	67951	OsKitaake11g085700
Chr11	8245315	8349314	103999	OsKitaake11g090400
Chr11	8245315	8349314	103999	OsKitaake11g090500
Chr11	8245315	8349314	103999	OsKitaake11g090600
Chr11	8245315	8349314	103999	OsKitaake11g090633
Chr11	8245315	8349314	103999	OsKitaake11g090600
Chr11	8245315	8349314	103999	OsKitaake11g090666
Chr11	8245315	8349314	103999	OsKitaake11g090700
Chr11	8245315	8349314	103999	OsKitaake11g090800
Chr11	8245315	8349314	103999	OsKitaake11g090900
Chr11	8349484	8365275	15791	OsKitaake11g091000
Chr11	8349484	8365275	15791	OsKitaake11g091100
Chr11	8349484	8365275	15791	OsKitaake11g091200
Chr11	8383688	8435679	51991	OsKitaake11g091600
Chr11	8383688	8435679	51991	OsKitaake11g091700
Chr11	8383688	8435679	51991	OsKitaake11g091900
Chr11	8595304	8714690	119386	OsKitaake11g092700
Chr11	8595304	8714690	119386	OsKitaake11g092800
Chr11	8595304	8714690	119386	OsKitaake11g092900
Chr11	8595304	8714690	119386	OsKitaake11g093000
Chr11	8595304	8714690	119386	OsKitaake11g093100
Chr11	8595304	8714690	119386	OsKitaake11g093200
Chr11	8595304	8714690	119386	OsKitaake11g093300
Chr11	8595304	8714690	119386	OsKitaake11g093501
Chr11	8595304	8714690	119386	OsKitaake11g093701
Chr11	8595304	8714690	119386	OsKitaake11g093901
Chr11	8997936	8999305	1369	OsKitaake11g095601
Chr11	9141859	9159560	17701	OsKitaake11g096600
Chr11	9163257	9208859	45602	OsKitaake11g096800
Chr11	9163257	9208859	45602	OsKitaake11g096850
Chr11	9163257	9208859	45602	OsKitaake11g096900
Chr11	9450462	9452115	1653	OsKitaake11g098900
Chr11	9563434	9563626	192	OsKitaake11g099800
Chr11	9695880	9711596	15716	OsKitaake11g100200
Chr11	9695880	9711596	15716	OsKitaake11g100250
Chr11	9810687	9859162	48475	OsKitaake11g101000
Chr11	9907721	9992212	84491	OsKitaake11g101100
Chr11	9907721	9992212	84491	OsKitaake11g101300
Chr11	9907721	9992212	84491	OsKitaake11g101400
Chr11	9907721	9992212	84491	OsKitaake11g101500
Chr11	9907721	9992212	84491	OsKitaake11g101600
Chr11	9907721	9992212	84491	OsKitaake11g101701
Chr11	10180507	10221322	40815	OsKitaake11g103401
Chr11	10180507	10221322	40815	OsKitaake11g103500
Chr11	10278864	10282547	3683	OsKitaake11g103700
Chr11	10288090	10368529	80439	OsKitaake11g103750
Chr11	10406736	10407260	524	OsKitaake11g104100
Chr11	11774537	11843655	69118	OsKitaake11g110300
Chr11	12105605	12158587	52982	OsKitaake11g112200
Chr11	12105605	12158587	52982	OsKitaake11g112400
Chr11	12667647	12676944	9297	OsKitaake11g113800
Chr11	12963149	13088215	125066	OsKitaake11g114400
Chr11	13597985	13598534	549	OsKitaake11g115550
Chr11	14478947	14485396	6449	OsKitaake11g120700
Chr11	14507348	14522924	15576	OsKitaake11g120900
Chr11	14652398	14776276	123878	OsKitaake11g121800
Chr11	14652398	14776276	123878	OsKitaake11g121901
Chr11	14652398	14776276	123878	OsKitaake11g122000
Chr11	14652398	14776276	123878	OsKitaake11g122100
Chr11	14652398	14776276	123878	OsKitaake11g122200
Chr11	14652398	14776276	123878	OsKitaake11g122300
Chr11	14652398	14776276	123878	OsKitaake11g122400
Chr11	14777565	14815994	38429	OsKitaake11g122500
Chr11	15351055	15492699	141644	OsKitaake11g124300
Chr11	15351055	15492699	141644	OsKitaake11g124400
Chr11	15351055	15492699	141644	OsKitaake11g124500
Chr11	15351055	15492699	141644	OsKitaake11g124550
Chr11	15351055	15492699	141644	OsKitaake11g124600
Chr11	15351055	15492699	141644	OsKitaake11g124700
Chr11	15654465	15655634	1169	OsKitaake11g126050
Chr11	15863854	15891559	27705	OsKitaake11g127400
Chr11	15863854	15891559	27705	OsKitaake11g127500
Chr11	15957635	16080240	122605	OsKitaake11g128100
Chr11	15957635	16080240	122605	OsKitaake11g128200
Chr11	15957635	16080240	122605	OsKitaake11g128300
Chr11	15957635	16080240	122605	OsKitaake11g128500
Chr11	15957635	16080240	122605	OsKitaake11g128600
Chr11	15957635	16080240	122605	OsKitaake11g128700
Chr11	15957635	16080240	122605	OsKitaake11g128800
Chr11	15957635	16080240	122605	OsKitaake11g128900
Chr11	16337978	16339099	1121	OsKitaake11g130001
Chr11	16603187	16637114	33927	OsKitaake11g131600
Chr11	16603187	16637114	33927	OsKitaake11g131700
Chr11	16603187	16637114	33927	OsKitaake11g131800
Chr11	16679452	16689001	9549	OsKitaake11g132100
Chr11	16765244	16765566	322	OsKitaake11g132433
Chr11	16816492	16828514	12022	OsKitaake11g132500
Chr11	17106926	17109411	2485	OsKitaake11g133566
Chr11	17120862	17121269	407	OsKitaake11g133700
Chr11	17123619	17144372	20753	OsKitaake11g133750
Chr11	17123619	17144372	20753	OsKitaake11g133800
Chr11	17144589	17144886	297	OsKitaake11g133800
Chr11	17237059	17237173	114	OsKitaake11g134400
Chr11	17332600	17336592	3992	OsKitaake11g135400
Chr11	17337417	17356798	19381	OsKitaake11g135501
Chr11	17337417	17356798	19381	OsKitaake11g135600
Chr11	17373137	17380146	7009	OsKitaake11g136000
Chr11	17373137	17380146	7009	OsKitaake11g136100
Chr11	17503415	17509893	6478	OsKitaake11g137000
Chr11	17511665	17511945	280	OsKitaake11g137100
Chr11	17546934	17549179	2245	OsKitaake11g137500
Chr11	17579035	17581146	2111	OsKitaake11g137800
Chr11	17619917	17627572	7655	OsKitaake11g137950
Chr11	17644618	17644714	96	OsKitaake11g138300
Chr11	17703426	17704878	1452	OsKitaake11g138850
Chr11	17853382	17853939	557	OsKitaake11g139800
Chr11	18277839	18279640	1801	OsKitaake11g142200
Chr11	18302326	18314062	11736	OsKitaake11g142350
Chr11	18649602	18654359	4757	OsKitaake11g144600
Chr11	18788749	18790557	1808	OsKitaake11g146300
Chr11	18794898	18799184	4286	OsKitaake11g146500
Chr11	18799781	19084576	284795	OsKitaake11g146500
Chr11	18799781	19084576	284795	OsKitaake11g146600
Chr11	18799781	19084576	284795	OsKitaake11g146650
Chr11	18799781	19084576	284795	OsKitaake11g146700
Chr11	18799781	19084576	284795	OsKitaake11g146750
Chr11	18799781	19084576	284795	OsKitaake11g146800
Chr11	18799781	19084576	284795	OsKitaake11g146900
Chr11	18799781	19084576	284795	OsKitaake11g147100
Chr11	18799781	19084576	284795	OsKitaake11g147200
Chr11	18799781	19084576	284795	OsKitaake11g147400
Chr11	18799781	19084576	284795	OsKitaake11g147500
Chr11	18799781	19084576	284795	OsKitaake11g147600
Chr11	18799781	19084576	284795	OsKitaake11g147700
Chr11	18799781	19084576	284795	OsKitaake11g147800
Chr11	18799781	19084576	284795	OsKitaake11g147900
Chr11	18799781	19084576	284795	OsKitaake11g148000
Chr11	18799781	19084576	284795	OsKitaake11g148100
Chr11	18799781	19084576	284795	OsKitaake11g148200
Chr11	19084853	19249642	164789	OsKitaake11g148300
Chr11	19084853	19249642	164789	OsKitaake11g148500
Chr11	19084853	19249642	164789	OsKitaake11g148600
Chr11	19084853	19249642	164789	OsKitaake11g148700
Chr11	19084853	19249642	164789	OsKitaake11g148800
Chr11	19084853	19249642	164789	OsKitaake11g148900
Chr11	19084853	19249642	164789	OsKitaake11g149000
Chr11	19084853	19249642	164789	OsKitaake11g149100
Chr11	19084853	19249642	164789	OsKitaake11g149300
Chr11	19348284	19363417	15133	OsKitaake11g150675
Chr11	19348284	19363417	15133	OsKitaake11g150750
Chr11	19348284	19363417	15133	OsKitaake11g150825
Chr11	19557643	19570166	12523	OsKitaake11g152300
Chr11	19557643	19570166	12523	OsKitaake11g152500
Chr11	19701145	19701396	251	OsKitaake11g153800
Chr11	19896978	19938933	41955	OsKitaake11g155900
Chr11	19896978	19938933	41955	OsKitaake11g156000
Chr11	19896978	19938933	41955	OsKitaake11g156200
Chr11	19896978	19938933	41955	OsKitaake11g156300
Chr11	19896978	19938933	41955	OsKitaake11g156450
Chr11	19950435	19977884	27449	OsKitaake11g156700
Chr11	19950435	19977884	27449	OsKitaake11g156800
Chr11	19950435	19977884	27449	OsKitaake11g156900
Chr11	19950435	19977884	27449	OsKitaake11g157000
Chr11	19990958	20039932	48974	OsKitaake11g157157
Chr11	19990958	20039932	48974	OsKitaake11g157214
Chr11	19990958	20039932	48974	OsKitaake11g157271
Chr11	20048611	20105832	57221	OsKitaake11g157328
Chr11	20048611	20105832	57221	OsKitaake11g157385
Chr11	20107104	20158637	51533	OsKitaake11g157442
Chr11	20107104	20158637	51533	OsKitaake11g157500
Chr11	20246956	20248327	1371	OsKitaake11g158100
Chr11	20355382	20362787	7405	OsKitaake11g159300
Chr11	20582225	20583677	1452	OsKitaake11g161000
Chr11	20662952	20707195	44243	OsKitaake11g162000
Chr11	20662952	20707195	44243	OsKitaake11g162100
Chr11	20662952	20707195	44243	OsKitaake11g162200
Chr11	20662952	20707195	44243	OsKitaake11g162301
Chr11	20662952	20707195	44243	OsKitaake11g162400
Chr11	20662952	20707195	44243	OsKitaake11g162600
Chr11	20662952	20707195	44243	OsKitaake11g162800
Chr11	20728032	20745858	17826	OsKitaake11g163300
Chr11	20728032	20745858	17826	OsKitaake11g163400
Chr11	20746968	20753324	6356	OsKitaake11g163500
Chr11	20746968	20753324	6356	OsKitaake11g163600
Chr11	20755194	20769185	13991	OsKitaake11g163600
Chr11	20755194	20769185	13991	OsKitaake11g163700
Chr11	20965805	20984659	18854	OsKitaake11g165701
Chr11	21279738	21284140	4402	OsKitaake11g168500
Chr11	21493247	21530822	37575	OsKitaake11g169800
Chr11	21493247	21530822	37575	OsKitaake11g169850
Chr11	21493247	21530822	37575	OsKitaake11g169900
Chr11	21539616	21702986	163370	OsKitaake11g170001
Chr11	21539616	21702986	163370	OsKitaake11g170100
Chr11	21539616	21702986	163370	OsKitaake11g170300
Chr11	21539616	21702986	163370	OsKitaake11g170400
Chr11	21539616	21702986	163370	OsKitaake11g170600
Chr11	21539616	21702986	163370	OsKitaake11g170700
Chr11	21539616	21702986	163370	OsKitaake11g170600
Chr11	21539616	21702986	163370	OsKitaake11g170700
Chr11	21539616	21702986	163370	OsKitaake11g170600
Chr11	21539616	21702986	163370	OsKitaake11g170800
Chr11	21539616	21702986	163370	OsKitaake11g170900
Chr11	21539616	21702986	163370	OsKitaake11g171000
Chr11	21539616	21702986	163370	OsKitaake11g171100
Chr11	21539616	21702986	163370	OsKitaake11g171200
Chr11	21539616	21702986	163370	OsKitaake11g171300
Chr11	21539616	21702986	163370	OsKitaake11g171400
Chr11	21539616	21702986	163370	OsKitaake11g171500
Chr11	21539616	21702986	163370	OsKitaake11g171600
Chr11	21539616	21702986	163370	OsKitaake11g171700
Chr11	21539616	21702986	163370	OsKitaake11g171800
Chr11	21539616	21702986	163370	OsKitaake11g172100
Chr11	21703533	21723364	19831	OsKitaake11g172200
Chr11	21941466	21980380	38914	OsKitaake11g173800
Chr11	22034142	22092945	58803	OsKitaake11g174400
Chr11	22093307	22094687	1380	OsKitaake11g174500
Chr11	22131860	22196670	64810	OsKitaake11g175100
Chr11	22131860	22196670	64810	OsKitaake11g175200
Chr11	22131860	22196670	64810	OsKitaake11g175500
Chr11	22131860	22196670	64810	OsKitaake11g175601
Chr11	22261423	22289050	27627	OsKitaake11g176300
Chr11	22261423	22289050	27627	OsKitaake11g176400
Chr11	22533135	22533852	717	OsKitaake11g178700
Chr11	22650510	22667977	17467	OsKitaake11g179850
Chr11	22881938	22884497	2559	OsKitaake11g181101
Chr11	22893060	22896412	3352	OsKitaake11g181200
Chr11	22987933	23045057	57124	OsKitaake11g182700
Chr11	22987933	23045057	57124	OsKitaake11g182800
Chr11	22987933	23045057	57124	OsKitaake11g182900
Chr11	23159679	23161094	1415	OsKitaake11g183450
Chr11	23171362	23175144	3782	OsKitaake11g183750
Chr11	23175879	23183824	7945	OsKitaake11g183800
Chr11	23350163	23357063	6900	OsKitaake11g186100
Chr11	23357473	23375614	18141	OsKitaake11g186100
Chr11	23357473	23375614	18141	OsKitaake11g186200
Chr11	23385346	23417030	31684	OsKitaake11g186400
Chr11	23385346	23417030	31684	OsKitaake11g186500
Chr11	23385346	23417030	31684	OsKitaake11g186540
Chr11	23385346	23417030	31684	OsKitaake11g186580
Chr11	23385346	23417030	31684	OsKitaake11g186620
Chr11	23385346	23417030	31684	OsKitaake11g186660
Chr11	23508254	23512279	4025	OsKitaake11g187700
Chr11	23508254	23512279	4025	OsKitaake11g187800
Chr11	23508254	23512279	4025	OsKitaake11g187900
Chr11	23508254	23512279	4025	OsKitaake11g188000
Chr11	23508254	23512279	4025	OsKitaake11g188100
Chr11	24032520	24108305	75785	OsKitaake11g193400
Chr11	24032520	24108305	75785	OsKitaake11g193500
Chr11	24032520	24108305	75785	OsKitaake11g193600
Chr11	24032520	24108305	75785	OsKitaake11g193700
Chr11	24108973	24154272	45299	OsKitaake11g193900
Chr11	24108973	24154272	45299	OsKitaake11g194000
Chr11	24108973	24154272	45299	OsKitaake11g194100
Chr11	24154525	24176742	22217	OsKitaake11g194100
Chr11	24154525	24176742	22217	OsKitaake11g194201
Chr11	24154525	24176742	22217	OsKitaake11g194300
Chr11	24361009	24363374	2365	OsKitaake11g195800
Chr11	24364303	24391524	27221	OsKitaake11g195800
Chr11	24364303	24391524	27221	OsKitaake11g196100
Chr11	24393452	24566230	172778	OsKitaake11g196200
Chr11	24393452	24566230	172778	OsKitaake11g196300
Chr11	24393452	24566230	172778	OsKitaake11g196400
Chr11	24393452	24566230	172778	OsKitaake11g196500
Chr11	24393452	24566230	172778	OsKitaake11g196600
Chr11	24393452	24566230	172778	OsKitaake11g196700
Chr11	24393452	24566230	172778	OsKitaake11g196800
Chr11	24393452	24566230	172778	OsKitaake11g196900
Chr11	24393452	24566230	172778	OsKitaake11g197000
Chr11	24393452	24566230	172778	OsKitaake11g197100
Chr11	24393452	24566230	172778	OsKitaake11g197201
Chr11	24393452	24566230	172778	OsKitaake11g197300
Chr11	24393452	24566230	172778	OsKitaake11g197400
Chr11	24393452	24566230	172778	OsKitaake11g197500
Chr11	24393452	24566230	172778	OsKitaake11g197600
Chr11	24393452	24566230	172778	OsKitaake11g197700
Chr11	24393452	24566230	172778	OsKitaake11g197800
Chr11	24393452	24566230	172778	OsKitaake11g198000
Chr11	24393452	24566230	172778	OsKitaake11g198100
Chr11	24566873	24606335	39462	OsKitaake11g198300
Chr11	24566873	24606335	39462	OsKitaake11g198400
Chr11	24566873	24606335	39462	OsKitaake11g198500
Chr11	24566873	24606335	39462	OsKitaake11g198600
Chr11	24606452	24653548	47096	OsKitaake11g198800
Chr11	24606452	24653548	47096	OsKitaake11g198900
Chr11	24606452	24653548	47096	OsKitaake11g199000
Chr11	24606452	24653548	47096	OsKitaake11g199101
Chr11	24606452	24653548	47096	OsKitaake11g199200
Chr11	24606452	24653548	47096	OsKitaake11g199300
Chr11	24606452	24653548	47096	OsKitaake11g199400
Chr11	24606452	24653548	47096	OsKitaake11g199500
Chr11	24606452	24653548	47096	OsKitaake11g199550
Chr11	24656597	24656707	110	OsKitaake11g199600
Chr11	24658720	24664641	5921	OsKitaake11g199700
Chr11	24693541	24727168	33627	OsKitaake11g200450
Chr11	24749534	24751295	1761	OsKitaake11g200900
Chr11	24768714	24774305	5591	OsKitaake11g201200
Chr11	24786642	24789092	2450	OsKitaake11g201400
Chr11	25031079	25035001	3922	OsKitaake11g202900
Chr11	25044584	25068841	24257	OsKitaake11g203010
Chr11	25115069	25132077	17008	OsKitaake11g203030
Chr11	25115069	25132077	17008	OsKitaake11g203035
Chr11	25115069	25132077	17008	OsKitaake11g203040
Chr11	25136126	25157936	21810	OsKitaake11g203045
Chr11	25158642	25175081	16439	OsKitaake11g203050
Chr11	25158642	25175081	16439	OsKitaake11g203055
Chr11	25185835	25224942	39107	OsKitaake11g203060
Chr11	25185835	25224942	39107	OsKitaake11g203065
Chr11	25225927	25250555	24628	OsKitaake11g203070
Chr11	25251393	25273443	22050	OsKitaake11g203075
Chr11	25251393	25273443	22050	OsKitaake11g203080
Chr11	25279733	25317451	37718	OsKitaake11g203085
Chr11	25279733	25317451	37718	OsKitaake11g203100
Chr11	25624458	25626199	1741	OsKitaake11g206800
Chr11	25907538	25913551	6013	OsKitaake11g208200
Chr11	26002677	26005225	2548	OsKitaake11g209600
Chr11	26017873	26027873	10000	OsKitaake11g210000
Chr11	26017873	26027873	10000	OsKitaake11g210100
Chr11	26116493	26147825	31332	OsKitaake11g211000
Chr11	26116493	26147825	31332	OsKitaake11g211100
Chr11	26116493	26147825	31332	OsKitaake11g211150
Chr11	26116493	26147825	31332	OsKitaake11g211200
Chr11	26116493	26147825	31332	OsKitaake11g211300
Chr11	26147936	26151977	4041	OsKitaake11g211400
Chr11	26434651	26453543	18892	OsKitaake11g214950
Chr11	26434651	26453543	18892	OsKitaake11g215000
Chr11	26434651	26453543	18892	OsKitaake11g215100
Chr11	26472459	26500753	28294	OsKitaake11g215200
Chr11	26472459	26500753	28294	OsKitaake11g215300
Chr11	26501035	26566777	65742	OsKitaake11g215501
Chr11	26501035	26566777	65742	OsKitaake11g215701
Chr11	26501035	26566777	65742	OsKitaake11g215900
Chr11	26501035	26566777	65742	OsKitaake11g216000
Chr11	26648533	26650296	1763	OsKitaake11g216900
Chr11	26793884	26824063	30179	OsKitaake11g218200
Chr11	26824946	26870450	45504	OsKitaake11g218400
Chr11	26824946	26870450	45504	OsKitaake11g218500
Chr11	26873300	26892708	19408	OsKitaake11g218600
Chr11	26903294	26908359	5065	OsKitaake11g218700
Chr11	26908767	26914972	6205	OsKitaake11g218800
Chr11	26929921	26981692	51771	OsKitaake11g219300
Chr11	26929921	26981692	51771	OsKitaake11g219400
Chr11	26985698	26986455	757	OsKitaake11g219450
Chr11	27043662	27056915	13253	OsKitaake11g220500
Chr11	27161072	27171120	10048	OsKitaake11g221700
Chr11	27176984	27182056	5072	OsKitaake11g221800
Chr11	27274920	27280798	5878	OsKitaake11g223100
Chr11	27287178	27299914	12736	OsKitaake11g223300
Chr11	27319439	27319940	501	OsKitaake11g223501
Chr11	27415455	27490788	75333	OsKitaake11g223600
Chr11	27415455	27490788	75333	OsKitaake11g223700
Chr11	27415455	27490788	75333	OsKitaake11g223800
Chr11	27415455	27490788	75333	OsKitaake11g223900
Chr11	27491537	27514409	22872	OsKitaake11g224000
Chr11	27594307	27624787	30480	OsKitaake11g224900
Chr11	27594307	27624787	30480	OsKitaake11g225000
Chr11	27626942	27635380	8438	OsKitaake11g225200
Chr11	27664963	27667162	2199	OsKitaake11g225400
Chr11	27664963	27667162	2199	OsKitaake11g225500
Chr11	27668508	27669401	893	OsKitaake11g225600
Chr11	27669968	27693491	23523	OsKitaake11g225700
Chr11	27669968	27693491	23523	OsKitaake11g226000
Chr11	27669968	27693491	23523	OsKitaake11g226050
Chr11	27669968	27693491	23523	OsKitaake11g225900
Chr11	27697058	27709961	12903	OsKitaake11g226100
Chr11	27697058	27709961	12903	OsKitaake11g226150
Chr11	27697058	27709961	12903	OsKitaake11g226200
Chr11	27697058	27709961	12903	OsKitaake11g226150
Chr11	27697058	27709961	12903	OsKitaake11g226200
Chr11	27697058	27709961	12903	OsKitaake11g226250
Chr11	27710369	27710741	372	OsKitaake11g226250
Chr11	27766628	27771609	4981	OsKitaake11g226600
Chr11	27935197	27937904	2707	OsKitaake11g229000
Chr11	27935197	27937904	2707	OsKitaake11g229050
Chr11	27945827	27949389	3562	OsKitaake11g229100
Chr11	27950554	27962875	12321	OsKitaake11g229200
Chr11	27964208	27987382	23174	OsKitaake11g229400
Chr11	27964208	27987382	23174	OsKitaake11g229500
Chr11	27964208	27987382	23174	OsKitaake11g229700
Chr11	27987766	27998730	10964	OsKitaake11g229800
Chr11	27987766	27998730	10964	OsKitaake11g229900
Chr11	28056647	28068704	12057	OsKitaake11g230400
Chr11	28056647	28068704	12057	OsKitaake11g230500
Chr11	28108050	28126356	18306	OsKitaake11g230600
Chr11	28136655	28150872	14217	OsKitaake11g230700
Chr11	28136655	28150872	14217	OsKitaake11g230900
Chr11	28136655	28150872	14217	OsKitaake11g231000
Chr11	28164948	28166796	1848	OsKitaake11g231200
Chr11	28282734	28344095	61361	OsKitaake11g232400
Chr11	28282734	28344095	61361	OsKitaake11g232501
Chr11	28572061	28630827	58766	OsKitaake11g233932
Chr11	28572061	28630827	58766	OsKitaake11g234000
Chr11	28572061	28630827	58766	OsKitaake11g234100
Chr11	28572061	28630827	58766	OsKitaake11g234200
Chr11	28572061	28630827	58766	OsKitaake11g234300
Chr11	28572061	28630827	58766	OsKitaake11g234400
Chr11	28572061	28630827	58766	OsKitaake11g234500
Chr11	28572061	28630827	58766	OsKitaake11g234600
Chr11	28633260	28680758	47498	OsKitaake11g234700
Chr11	28633260	28680758	47498	OsKitaake11g234800
Chr11	28633260	28680758	47498	OsKitaake11g234900
Chr11	28633260	28680758	47498	OsKitaake11g235101
Chr11	28681279	28733451	52172	OsKitaake11g235300
Chr11	28748994	28770756	21762	OsKitaake11g235501
Chr11	28857572	28859591	2019	OsKitaake11g236250
Chr11	28884183	28895302	11119	OsKitaake11g236600
Chr11	28949666	28958067	8401	OsKitaake11g236700
Chr11	28975179	28981860	6681	OsKitaake11g237200
Chr11	28982018	29021030	39012	OsKitaake11g237300
Chr11	28982018	29021030	39012	OsKitaake11g237500
Chr11	28982018	29021030	39012	OsKitaake11g237600
Chr11	29029785	29037319	7534	OsKitaake11g237700
Chr11	29029785	29037319	7534	OsKitaake11g237800
Chr11	29054529	29059511	4982	OsKitaake11g238000
Chr11	29060179	29061439	1260	OsKitaake11g238100
Chr11	29065600	29184923	119323	OsKitaake11g238200
Chr11	29065600	29184923	119323	OsKitaake11g238300
Chr11	29065600	29184923	119323	OsKitaake11g238400
Chr11	29065600	29184923	119323	OsKitaake11g238500
Chr11	29065600	29184923	119323	OsKitaake11g238600
Chr11	29065600	29184923	119323	OsKitaake11g238700
Chr11	29065600	29184923	119323	OsKitaake11g238800
Chr11	29065600	29184923	119323	OsKitaake11g238900
Chr11	29065600	29184923	119323	OsKitaake11g239000
Chr11	29065600	29184923	119323	OsKitaake11g239100
Chr11	29065600	29184923	119323	OsKitaake11g239200
Chr11	29185365	29195545	10180	OsKitaake11g239300
Chr11	29442558	29444144	1586	OsKitaake11g241600
Chr11	29452145	29452556	411	OsKitaake11g241650
Chr11	29462371	29463857	1486	OsKitaake11g242200
Chr12	113691	120255	6564	OsKitaake12g001100
Chr12	113691	120255	6564	OsKitaake12g001300
Chr12	212666	213053	387	OsKitaake12g002400
Chr12	227045	265635	38590	OsKitaake12g002700
Chr12	227045	265635	38590	OsKitaake12g002800
Chr12	227045	265635	38590	OsKitaake12g002901
Chr12	538666	545271	6605	OsKitaake12g006600
Chr12	637372	662199	24827	OsKitaake12g008400
Chr12	637372	662199	24827	OsKitaake12g008500
Chr12	663071	668614	5543	OsKitaake12g008500
Chr12	663071	668614	5543	OsKitaake12g008600
Chr12	704613	710334	5721	OsKitaake12g009700
Chr12	931400	935492	4092	OsKitaake12g013700
Chr12	947338	958920	11582	OsKitaake12g013900
Chr12	947338	958920	11582	OsKitaake12g014000
Chr12	960268	963199	2931	OsKitaake12g014050
Chr12	1114271	1117184	2913	OsKitaake12g016500
Chr12	1500163	1504780	4617	OsKitaake12g022500
Chr12	1507114	1514459	7345	OsKitaake12g022600
Chr12	1507114	1514459	7345	OsKitaake12g022700
Chr12	1679247	1684170	4923	OsKitaake12g025400
Chr12	1797660	1798848	1188	OsKitaake12g026700
Chr12	1797660	1798848	1188	OsKitaake12g026800
Chr12	1804196	1804504	308	OsKitaake12g026900
Chr12	1920933	1933260	12327	OsKitaake12g029700
Chr12	1920933	1933260	12327	OsKitaake12g029800
Chr12	2120337	2161018	40681	OsKitaake12g033500
Chr12	2339144	2342533	3389	OsKitaake12g035950
Chr12	2397218	2397481	263	OsKitaake12g036600
Chr12	2429734	2433576	3842	OsKitaake12g036950
Chr12	2437810	2443324	5514	OsKitaake12g037100
Chr12	3516062	3613833	97771	OsKitaake12g049400
Chr12	3516062	3613833	97771	OsKitaake12g049500
Chr12	3516062	3613833	97771	OsKitaake12g049550
Chr12	3516062	3613833	97771	OsKitaake12g049600
Chr12	3516062	3613833	97771	OsKitaake12g049700
Chr12	3516062	3613833	97771	OsKitaake12g049900
Chr12	3516062	3613833	97771	OsKitaake12g050000
Chr12	3516062	3613833	97771	OsKitaake12g050100
Chr12	3516062	3613833	97771	OsKitaake12g050200
Chr12	3516062	3613833	97771	OsKitaake12g050300
Chr12	3619259	3702205	82946	OsKitaake12g050500
Chr12	3619259	3702205	82946	OsKitaake12g050600
Chr12	3619259	3702205	82946	OsKitaake12g050700
Chr12	3619259	3702205	82946	OsKitaake12g050800
Chr12	3619259	3702205	82946	OsKitaake12g051000
Chr12	3619259	3702205	82946	OsKitaake12g051100
Chr12	3619259	3702205	82946	OsKitaake12g051200
Chr12	3619259	3702205	82946	OsKitaake12g051300
Chr12	3619259	3702205	82946	OsKitaake12g051400
Chr12	3619259	3702205	82946	OsKitaake12g051500
Chr12	3760132	3760601	469	OsKitaake12g052300
Chr12	3761208	3761412	204	OsKitaake12g052300
Chr12	3821847	3835194	13347	OsKitaake12g052850
Chr12	3821847	3835194	13347	OsKitaake12g052900
Chr12	4086977	4092621	5644	OsKitaake12g055700
Chr12	4086977	4092621	5644	OsKitaake12g055800
Chr12	4095379	4120596	25217	OsKitaake12g056001
Chr12	4095379	4120596	25217	OsKitaake12g056100
Chr12	4095379	4120596	25217	OsKitaake12g056200
Chr12	4151888	4182733	30845	OsKitaake12g056800
Chr12	4151888	4182733	30845	OsKitaake12g056933
Chr12	4151888	4182733	30845	OsKitaake12g057066
Chr12	4151888	4182733	30845	OsKitaake12g057200
Chr12	4183394	4184074	680	OsKitaake12g057300
Chr12	4185772	4194050	8278	OsKitaake12g057400
Chr12	4249443	4250768	1325	OsKitaake12g057800
Chr12	4252770	4256232	3462	OsKitaake12g057900
Chr12	4356163	4505161	148998	OsKitaake12g059800
Chr12	4356163	4505161	148998	OsKitaake12g059900
Chr12	4356163	4505161	148998	OsKitaake12g060000
Chr12	4356163	4505161	148998	OsKitaake12g060101
Chr12	4356163	4505161	148998	OsKitaake12g060201
Chr12	5007820	5014283	6463	OsKitaake12g064200
Chr12	5047160	5051767	4607	OsKitaake12g064300
Chr12	5095056	5115690	20634	OsKitaake12g064700
Chr12	5095056	5115690	20634	OsKitaake12g064750
Chr12	5145256	5148922	3666	OsKitaake12g065200
Chr12	5237207	5238261	1054	OsKitaake12g066200
Chr12	5239494	5270426	30932	OsKitaake12g066300
Chr12	5239494	5270426	30932	OsKitaake12g066400
Chr12	5498795	5539604	40809	OsKitaake12g067400
Chr12	5498795	5539604	40809	OsKitaake12g067500
Chr12	5498795	5539604	40809	OsKitaake12g067600
Chr12	5498795	5539604	40809	OsKitaake12g067700
Chr12	5638824	5643506	4682	OsKitaake12g068601
Chr12	5789721	5796373	6652	OsKitaake12g070000
Chr12	5846633	5850616	3983	OsKitaake12g070500
Chr12	5873872	5876883	3011	OsKitaake12g070800
Chr12	5877602	5878884	1282	OsKitaake12g070900
Chr12	6097097	6124894	27797	OsKitaake12g072000
Chr12	6097097	6124894	27797	OsKitaake12g072025
Chr12	6097097	6124894	27797	OsKitaake12g071900
Chr12	6097097	6124894	27797	OsKitaake12g071800
Chr12	6097097	6124894	27797	OsKitaake12g071825
Chr12	6140274	6143852	3578	OsKitaake12g071500
Chr12	6145740	6179011	33271	OsKitaake12g071525
Chr12	6213958	6214224	266	OsKitaake12g072200
Chr12	6214449	6214606	157	OsKitaake12g072200
Chr12	6228329	6229431	1102	OsKitaake12g072300
Chr12	6233173	6236683	3510	OsKitaake12g072400
Chr12	6240442	6419818	179376	OsKitaake12g072500
Chr12	6240442	6419818	179376	OsKitaake12g072601
Chr12	6240442	6419818	179376	OsKitaake12g072700
Chr12	6240442	6419818	179376	OsKitaake12g072800
Chr12	6240442	6419818	179376	OsKitaake12g072850
Chr12	6240442	6419818	179376	OsKitaake12g072900
Chr12	6240442	6419818	179376	OsKitaake12g073000
Chr12	6240442	6419818	179376	OsKitaake12g073100
Chr12	6240442	6419818	179376	OsKitaake12g073200
Chr12	6240442	6419818	179376	OsKitaake12g073300
Chr12	6240442	6419818	179376	OsKitaake12g073350
Chr12	6240442	6419818	179376	OsKitaake12g073400
Chr12	6240442	6419818	179376	OsKitaake12g073600
Chr12	6240442	6419818	179376	OsKitaake12g073700
Chr12	6240442	6419818	179376	OsKitaake12g073800
Chr12	6240442	6419818	179376	OsKitaake12g073900
Chr12	6523926	6524559	633	OsKitaake12g075201
Chr12	6574133	6574320	187	OsKitaake12g075600
Chr12	6822697	6827001	4304	OsKitaake12g077500
Chr12	6822697	6827001	4304	OsKitaake12g077600
Chr12	7323271	7323829	558	OsKitaake12g080800
Chr12	7397504	7398952	1448	OsKitaake12g081200
Chr12	7667244	7667569	325	OsKitaake12g083050
Chr12	7689259	7701428	12169	OsKitaake12g083300
Chr12	7689259	7701428	12169	OsKitaake12g083400
Chr12	7776859	7777859	1000	OsKitaake12g083700
Chr12	7802675	7990934	188259	OsKitaake12g083800
Chr12	7802675	7990934	188259	OsKitaake12g083900
Chr12	7802675	7990934	188259	OsKitaake12g084000
Chr12	7802675	7990934	188259	OsKitaake12g084100
Chr12	7802675	7990934	188259	OsKitaake12g084200
Chr12	7802675	7990934	188259	OsKitaake12g084500
Chr12	7802675	7990934	188259	OsKitaake12g084550
Chr12	7993279	8212771	219492	OsKitaake12g084600
Chr12	7993279	8212771	219492	OsKitaake12g084700
Chr12	7993279	8212771	219492	OsKitaake12g084800
Chr12	7993279	8212771	219492	OsKitaake12g084900
Chr12	7993279	8212771	219492	OsKitaake12g085000
Chr12	7993279	8212771	219492	OsKitaake12g085100
Chr12	7993279	8212771	219492	OsKitaake12g085200
Chr12	7993279	8212771	219492	OsKitaake12g085500
Chr12	7993279	8212771	219492	OsKitaake12g085600
Chr12	7993279	8212771	219492	OsKitaake12g085666
Chr12	8213118	8240385	27267	OsKitaake12g085732
Chr12	8213118	8240385	27267	OsKitaake12g085800
Chr12	8241185	8276990	35805	OsKitaake12g085900
Chr12	8280607	8309044	28437	OsKitaake12g086000
Chr12	8327978	8332288	4310	OsKitaake12g086200
Chr12	8338649	8340855	2206	OsKitaake12g086350
Chr12	8342258	8346500	4242	OsKitaake12g086350
Chr12	8348171	8350067	1896	OsKitaake12g086400
Chr12	8402893	8403459	566	OsKitaake12g087200
Chr12	8828305	8860094	31789	OsKitaake12g088750
Chr12	8828305	8860094	31789	OsKitaake12g088800
Chr12	8828305	8860094	31789	OsKitaake12g088900
Chr12	8828305	8860094	31789	OsKitaake12g089000
Chr12	9256394	9263624	7230	OsKitaake12g090700
Chr12	9315807	9326361	10554	OsKitaake12g090900
Chr12	9514093	9560307	46214	OsKitaake12g092100
Chr12	9514093	9560307	46214	OsKitaake12g092200
Chr12	9514093	9560307	46214	OsKitaake12g092300
Chr12	9589296	9616694	27398	OsKitaake12g092600
Chr12	9589296	9616694	27398	OsKitaake12g092700
Chr12	9634715	9635047	332	OsKitaake12g093000
Chr12	9704532	9716619	12087	OsKitaake12g093300
Chr12	9704532	9716619	12087	OsKitaake12g093400
Chr12	9704532	9716619	12087	OsKitaake12g093500
Chr12	10110945	10133018	22073	OsKitaake12g095400
Chr12	10110945	10133018	22073	OsKitaake12g095650
Chr12	10313277	10313424	147	OsKitaake12g096700
Chr12	10675884	10678879	2995	OsKitaake12g099400
Chr12	10675884	10678879	2995	OsKitaake12g099500
Chr12	10675884	10678879	2995	OsKitaake12g099600
Chr12	10675884	10678879	2995	OsKitaake12g099700
Chr12	10793119	10866423	73304	OsKitaake12g100200
Chr12	10793119	10866423	73304	OsKitaake12g100300
Chr12	10793119	10866423	73304	OsKitaake12g100400
Chr12	10793119	10866423	73304	OsKitaake12g100500
Chr12	10793119	10866423	73304	OsKitaake12g100600
Chr12	10793119	10866423	73304	OsKitaake12g100701
Chr12	10793119	10866423	73304	OsKitaake12g100800
Chr12	11471146	11493760	22614	OsKitaake12g102501
Chr12	11471146	11493760	22614	OsKitaake12g102600
Chr12	11504026	11504360	334	OsKitaake12g102801
Chr12	12445320	12452406	7086	OsKitaake12g106400
Chr12	12973353	13099435	126082	OsKitaake12g130401
Chr12	12973353	13099435	126082	OsKitaake12g152100
Chr12	12973353	13099435	126082	OsKitaake12g109200
Chr12	13160135	13251588	91453	OsKitaake12g109900
Chr12	13160135	13251588	91453	OsKitaake12g110100
Chr12	13160135	13251588	91453	OsKitaake12g110000
Chr12	13160135	13251588	91453	OsKitaake12g110100
Chr12	13160135	13251588	91453	OsKitaake12g110101
Chr12	13160135	13251588	91453	OsKitaake12g110200
Chr12	13415645	13416866	1221	OsKitaake12g111300
Chr12	13608173	13613325	5152	OsKitaake12g112200
Chr12	13890185	13890503	318	OsKitaake12g113900
Chr12	13911022	13940060	29038	OsKitaake12g114200
Chr12	14109280	14119273	9993	OsKitaake12g114800
Chr12	14662013	14691329	29316	OsKitaake12g117300
Chr12	15273257	15320399	47142	OsKitaake12g119400
Chr12	15461772	15462283	511	OsKitaake12g119900
Chr12	15729894	15813626	83732	OsKitaake12g121700
Chr12	15729894	15813626	83732	OsKitaake12g121800
Chr12	15832335	16011090	178755	OsKitaake12g122000
Chr12	15832335	16011090	178755	OsKitaake12g122150
Chr12	15832335	16011090	178755	OsKitaake12g122300
Chr12	15832335	16011090	178755	OsKitaake12g122400
Chr12	15832335	16011090	178755	OsKitaake12g122500
Chr12	15832335	16011090	178755	OsKitaake12g122550
Chr12	15832335	16011090	178755	OsKitaake12g122600
Chr12	16022441	16116377	93936	OsKitaake12g122750
Chr12	16022441	16116377	93936	OsKitaake12g122900
Chr12	16022441	16116377	93936	OsKitaake12g123000
Chr12	16022441	16116377	93936	OsKitaake12g123200
Chr12	16022441	16116377	93936	OsKitaake12g123250
Chr12	16022441	16116377	93936	OsKitaake12g123300
Chr12	16022441	16116377	93936	OsKitaake12g123400
Chr12	16022441	16116377	93936	OsKitaake12g123450
Chr12	16278673	16280691	2018	OsKitaake12g124200
Chr12	17382905	17502498	119593	OsKitaake12g127800
Chr12	17382905	17502498	119593	OsKitaake12g127900
Chr12	17382905	17502498	119593	OsKitaake12g128000
Chr12	17382905	17502498	119593	OsKitaake12g128100
Chr12	17382905	17502498	119593	OsKitaake12g128200
Chr12	17382905	17502498	119593	OsKitaake12g128300
Chr12	17382905	17502498	119593	OsKitaake12g128401
Chr12	17382905	17502498	119593	OsKitaake12g128500
Chr12	17382905	17502498	119593	OsKitaake12g128600
Chr12	17382905	17502498	119593	OsKitaake12g128700
Chr12	17382905	17502498	119593	OsKitaake12g128800
Chr12	17382905	17502498	119593	OsKitaake12g128900
Chr12	17502799	17567347	64548	OsKitaake12g129000
Chr12	17502799	17567347	64548	OsKitaake12g129100
Chr12	17502799	17567347	64548	OsKitaake12g129200
Chr12	17502799	17567347	64548	OsKitaake12g129300
Chr12	17502799	17567347	64548	OsKitaake12g129400
Chr12	17502799	17567347	64548	OsKitaake12g129466
Chr12	17570639	17693473	122834	OsKitaake12g129532
Chr12	17570639	17693473	122834	OsKitaake12g129600
Chr12	17570639	17693473	122834	OsKitaake12g129800
Chr12	17570639	17693473	122834	OsKitaake12g129900
Chr12	17570639	17693473	122834	OsKitaake12g130000
Chr12	17570639	17693473	122834	OsKitaake12g130100
Chr12	17570639	17693473	122834	OsKitaake12g130200
Chr12	17570639	17693473	122834	OsKitaake12g130300
Chr12	17570639	17693473	122834	OsKitaake12g130400
Chr12	18057973	18058201	228	OsKitaake12g133100
Chr12	18177651	18183538	5887	OsKitaake12g133525
Chr12	18177651	18183538	5887	OsKitaake12g133550
Chr12	18565204	18565427	223	OsKitaake12g136000
Chr12	18746478	18753929	7451	OsKitaake12g138500
Chr12	18746478	18753929	7451	OsKitaake12g138600
Chr12	19122636	19122889	253	OsKitaake12g141900
Chr12	19274927	19290560	15633	OsKitaake12g144200
Chr12	19413795	19428812	15017	OsKitaake12g145300
Chr12	19413795	19428812	15017	OsKitaake12g145400
Chr12	19805998	19930691	124693	OsKitaake12g148200
Chr12	19933327	19934441	1114	OsKitaake12g148300
Chr12	19957614	19961076	3462	OsKitaake12g148400
Chr12	20068927	20090684	21757	OsKitaake12g149451
Chr12	20068927	20090684	21757	OsKitaake12g149601
Chr12	20068927	20090684	21757	OsKitaake12g149751
Chr12	20068927	20090684	21757	OsKitaake12g149901
Chr12	20068927	20090684	21757	OsKitaake12g150051
Chr12	20218198	20229541	11343	OsKitaake12g156500
Chr12	20232170	20238371	6201	OsKitaake12g156600
Chr12	20411911	20416357	4446	OsKitaake12g159200
Chr12	20411911	20416357	4446	OsKitaake12g159400
Chr12	20411911	20416357	4446	OsKitaake12g159500
Chr12	20411911	20416357	4446	OsKitaake12g159600
Chr12	20622629	20624366	1737	OsKitaake12g160200
Chr12	21321447	21336798	15351	OsKitaake12g167500
Chr12	21697121	21700154	3033	OsKitaake12g170050
Chr12	21812854	21834987	22133	OsKitaake12g171400
Chr12	21906282	21928184	21902	OsKitaake12g171700
Chr12	21906282	21928184	21902	OsKitaake12g171800
Chr12	21937859	21938426	567	OsKitaake12g172100
Chr12	21976349	21984136	7787	OsKitaake12g172400
Chr12	22317072	22340195	23123	OsKitaake12g175500
Chr12	22317072	22340195	23123	OsKitaake12g175600
Chr12	22317072	22340195	23123	OsKitaake12g175666
Chr12	22415312	22420082	4770	OsKitaake12g175900
Chr12	22429828	22431664	1836	OsKitaake12g175900
Chr12	22469492	22481660	12168	OsKitaake12g176001
Chr12	22584217	22586391	2174	OsKitaake12g177400
Chr12	22600977	22829190	228213	OsKitaake12g177701
Chr12	22600977	22829190	228213	OsKitaake12g177800
Chr12	22600977	22829190	228213	OsKitaake12g177900
Chr12	22600977	22829190	228213	OsKitaake12g178000
Chr12	22600977	22829190	228213	OsKitaake12g178100
Chr12	22600977	22829190	228213	OsKitaake12g178200
Chr12	22600977	22829190	228213	OsKitaake12g178300
Chr12	22600977	22829190	228213	OsKitaake12g178400
Chr12	22600977	22829190	228213	OsKitaake12g178500
Chr12	22600977	22829190	228213	OsKitaake12g178600
Chr12	22600977	22829190	228213	OsKitaake12g178700
Chr12	22600977	22829190	228213	OsKitaake12g178800
Chr12	22600977	22829190	228213	OsKitaake12g178900
Chr12	22600977	22829190	228213	OsKitaake12g179000
Chr12	22600977	22829190	228213	OsKitaake12g179100
Chr12	22600977	22829190	228213	OsKitaake12g179200
Chr12	22600977	22829190	228213	OsKitaake12g179300
Chr12	22600977	22829190	228213	OsKitaake12g179400
Chr12	22600977	22829190	228213	OsKitaake12g179500
Chr12	22600977	22829190	228213	OsKitaake12g179600
Chr12	22600977	22829190	228213	OsKitaake12g179700
Chr12	22600977	22829190	228213	OsKitaake12g179800
Chr12	22600977	22829190	228213	OsKitaake12g179900
Chr12	22600977	22829190	228213	OsKitaake12g180000
Chr12	22600977	22829190	228213	OsKitaake12g180100
Chr12	22600977	22829190	228213	OsKitaake12g180200
Chr12	22600977	22829190	228213	OsKitaake12g180300
Chr12	22901723	22925535	23812	OsKitaake12g181501
Chr12	22993656	22993942	286	OsKitaake12g182701
Chr12	23080522	23111043	30521	OsKitaake12g184300
Chr12	23237670	23242161	4491	OsKitaake12g185801
Chr12	23303397	23330661	27264	OsKitaake12g186650
Chr12	23341959	23342122	163	OsKitaake12g186750
Chr12	23497782	23498621	839	OsKitaake12g188500
Chr12	23531331	23552624	21293	OsKitaake12g188800
Chr12	23531331	23552624	21293	OsKitaake12g188950
Chr12	23531331	23552624	21293	OsKitaake12g188800
Chr12	23817752	23832012	14260	OsKitaake12g191766
Chr12	23817752	23832012	14260	OsKitaake12g191800
Chr12	23817752	23832012	14260	OsKitaake12g191900
Chr12	24051440	24069525	18085	OsKitaake12g193600
Chr12	24051440	24069525	18085	OsKitaake12g193700
Chr12	24072755	24106852	34097	OsKitaake12g193800
Chr12	24564668	24565613	945	OsKitaake12g198800
Chr12	25149933	25153777	3844	OsKitaake12g204000
Chr12	25149933	25153777	3844	OsKitaake12g204100
Chr12	25413873	25414042	169	OsKitaake12g208500
Chr12	25504232	25504340	108	OsKitaake12g209700
Chr12	25535458	25535996	538	OsKitaake12g209800
Chr12	25536529	25537026	497	OsKitaake12g209800
Chr12	25801640	25802105	465	OsKitaake12g213500
Chr12	25802336	25804009	1673	OsKitaake12g213500
Chr12	26549755	26561775	12020	OsKitaake12g220200
Chr12	26549755	26561775	12020	OsKitaake12g220300
Chr12	26549755	26561775	12020	OsKitaake12g220400
Chr12	26549755	26561775	12020	OsKitaake12g220500
Chr12	26718096	26739972	21876	OsKitaake12g222100
Chr2	33285	44674	11389	OsKitaake02g000600
Chr2	33285	44674	11389	OsKitaake02g000700
Chr2	78721	79029	308	OsKitaake02g001200
Chr2	259022	259317	295	OsKitaake02g004000
Chr2	517173	517825	652	OsKitaake02g007750
Chr2	1017179	1020073	2894	OsKitaake02g014900
Chr2	2202137	2210038	7901	OsKitaake02g033400
Chr2	2608513	2615350	6837	OsKitaake02g037200
Chr2	2608513	2615350	6837	OsKitaake02g037300
Chr2	2608513	2615350	6837	OsKitaake02g037400
Chr2	2998877	3000405	1528	OsKitaake02g042750
Chr2	3011858	3013485	1627	OsKitaake02g043301
Chr2	3011858	3013485	1627	OsKitaake02g043700
Chr2	3025363	3027178	1815	OsKitaake02g043300
Chr2	3033966	3036266	2300	OsKitaake02g043500
Chr2	3055555	3062213	6658	OsKitaake02g043601
Chr2	3055555	3062213	6658	OsKitaake02g043651
Chr2	3121604	3126319	4715	OsKitaake02g044650
Chr2	3160112	3162294	2182	OsKitaake02g045400
Chr2	3459941	3527190	67249	OsKitaake02g050300
Chr2	3459941	3527190	67249	OsKitaake02g050400
Chr2	3459941	3527190	67249	OsKitaake02g050500
Chr2	3459941	3527190	67249	OsKitaake02g050600
Chr2	3459941	3527190	67249	OsKitaake02g050800
Chr2	3459941	3527190	67249	OsKitaake02g050700
Chr2	3459941	3527190	67249	OsKitaake02g050900
Chr2	3459941	3527190	67249	OsKitaake02g051000
Chr2	3459941	3527190	67249	OsKitaake02g051100
Chr2	4089687	4097459	7772	OsKitaake02g057650
Chr2	4176201	4251863	75662	OsKitaake02g059000
Chr2	4176201	4251863	75662	OsKitaake02g059100
Chr2	4176201	4251863	75662	OsKitaake02g059200
Chr2	4176201	4251863	75662	OsKitaake02g059300
Chr2	4176201	4251863	75662	OsKitaake02g059400
Chr2	4176201	4251863	75662	OsKitaake02g059500
[truncated: 3,009 more rows]

## Sheet: Inversion-genes
Additional file 5 Comparative genomic analysis between KitaakeX and Zhenshan97
[truncated: 15 more rows]
